# Supplementary material for: Integrative phenotyping analyses reveal the relevance of the phyB-PIF4 pathway in Arabidopsis thaliana reproductive organs at high ambient temperature
Source: BMC Plant Biol. 2024 Jul 29;24:721. doi: 10.1186/s12870-024-05394-w (PMC11285529; doi:10.1186/s12870-024-05394-w)
Supplement: Supplementary file 6 — Additional File 3: Table S4 [file 12870_2024_5394_MOESM6_ESM.xlsx]

## Sheet: ANOVA_Tukey_NC_39
group1	group2	meandiff	p-adj	lower	upper	reject
COL_0	35S::PIF4	-2216.89	0	-2763.95	-1669.83	TRUE
COL_0	phyb	-3053.7	0	-3608.52	-2498.88	TRUE
COL_0	pif3	-1669.58	0	-2216.64	-1122.52	TRUE
COL_0	pif4	42.3749	1	-504.687	589.437	FALSE
COL_0	pif7	-659.871	0.0064	-1206.93	-112.809	TRUE
COL_0	pif7-2	108.345	0.9995	-446.477	663.166	FALSE
COL_0	pif7pif3	-297.793	0.7374	-844.854	249.269	FALSE
COL_0	pifq	-559.771	0.0406	-1106.83	-12.7097	TRUE
35S::PIF4	phyb	-836.808	0.0001	-1383.87	-289.747	TRUE
35S::PIF4	pif3	547.31	0.0437	8.1201	1086.5	TRUE
35S::PIF4	pif4	2259.27	0	1720.08	2798.46	TRUE
35S::PIF4	pif7	1557.02	0	1017.83	2096.21	TRUE
35S::PIF4	pif7-2	2325.24	0	1778.18	2872.3	TRUE
35S::PIF4	pif7pif3	1919.1	0	1379.91	2458.29	TRUE
35S::PIF4	pifq	1657.12	0	1117.93	2196.31	TRUE
phyb	pif3	1384.12	0	837.057	1931.18	TRUE
phyb	pif4	3096.08	0	2549.01	3643.14	TRUE
phyb	pif7	2393.83	0	1846.77	2940.89	TRUE
phyb	pif7-2	3162.05	0	2607.22	3716.87	TRUE
phyb	pif7pif3	2755.91	0	2208.85	3302.97	TRUE
phyb	pifq	2493.93	0	1946.87	3040.99	TRUE
pif3	pif4	1711.96	0	1172.77	2251.15	TRUE
pif3	pif7	1009.71	0	470.522	1548.9	TRUE
pif3	pif7-2	1777.93	0	1230.87	2324.99	TRUE
pif3	pif7pif3	1371.79	0	832.6	1910.98	TRUE
pif3	pifq	1109.81	0	570.622	1649	TRUE
pif4	pif7	-702.246	0.0022	-1241.44	-163.056	TRUE
pif4	pif7-2	65.9697	1	-481.092	613.031	FALSE
pif4	pif7pif3	-340.167	0.5557	-879.357	199.022	FALSE
pif4	pifq	-602.146	0.0165	-1141.34	-62.9564	TRUE
pif7	pif7-2	768.215	0.0006	221.154	1315.28	TRUE
pif7	pif7pif3	362.078	0.4681	-177.112	901.268	FALSE
pif7	pifq	100.1	0.9997	-439.09	639.289	FALSE
pif7-2	pif7pif3	-406.137	0.3272	-953.199	140.924	FALSE
pif7-2	pifq	-668.116	0.0054	-1215.18	-121.054	TRUE
pif7pif3	pifq	-261.979	0.84	-801.169	277.211	FALSE

## Sheet: ANOVA_Tukey_NC_38
group1	group2	meandiff	p-adj	lower	upper	reject
COL_0	35S::PIF4	-2257.78	0	-2603.52	-1912.05	TRUE
COL_0	phyb	-3005.02	0	-3353.14	-2656.9	TRUE
COL_0	pif3	-1662.1	0	-2007.83	-1316.37	TRUE
COL_0	pif4	37.1537	1	-308.578	382.885	FALSE
COL_0	pif7	-648.519	0	-994.251	-302.787	TRUE
COL_0	pif7-2	28.1581	1	-322.478	378.794	FALSE
COL_0	pif7pif3	-341.951	0.0552	-687.683	3.7811	FALSE
COL_0	pifq	-662.669	0	-1008.4	-316.937	TRUE
35S::PIF4	phyb	-747.238	0	-1090.42	-404.055	TRUE
35S::PIF4	pif3	595.683	0	254.926	936.44	TRUE
35S::PIF4	pif4	2294.94	0	1954.18	2635.69	TRUE
35S::PIF4	pif7	1609.27	0	1268.51	1950.02	TRUE
35S::PIF4	pif7-2	2285.94	0	1940.21	2631.67	TRUE
35S::PIF4	pif7pif3	1915.83	0	1575.08	2256.59	TRUE
35S::PIF4	pifq	1595.12	0	1254.36	1935.87	TRUE
phyb	pif3	1342.92	0	999.739	1686.1	TRUE
phyb	pif4	3042.18	0	2698.99	3385.36	TRUE
phyb	pif7	2356.5	0	2013.32	2699.69	TRUE
phyb	pif7-2	3033.18	0	2685.06	3381.3	TRUE
phyb	pif7pif3	2663.07	0	2319.89	3006.25	TRUE
phyb	pifq	2342.35	0	1999.17	2685.54	TRUE
pif3	pif4	1699.25	0	1358.5	2040.01	TRUE
pif3	pif7	1013.58	0	672.825	1354.34	TRUE
pif3	pif7-2	1690.26	0	1344.53	2035.99	TRUE
pif3	pif7pif3	1320.15	0	979.393	1660.91	TRUE
pif3	pifq	999.432	0	658.675	1340.19	TRUE
pif4	pif7	-685.673	0	-1026.43	-344.916	TRUE
pif4	pif7-2	-8.9955	1	-354.727	336.736	FALSE
pif4	pif7pif3	-379.104	0.0168	-719.861	-38.3474	TRUE
pif4	pifq	-699.823	0	-1040.58	-359.065	TRUE
pif7	pif7-2	676.677	0	330.945	1022.41	TRUE
pif7	pif7pif3	306.568	0.1165	-34.1889	647.325	FALSE
pif7	pifq	-14.15	1	-354.907	326.607	FALSE
pif7-2	pif7pif3	-370.109	0.0256	-715.841	-24.3771	TRUE
pif7-2	pifq	-690.827	0	-1036.56	-345.095	TRUE
pif7pif3	pifq	-320.718	0.0834	-661.475	20.0389	FALSE

## Sheet: ANOVA_Tukey_NC_37
group1	group2	meandiff	p-adj	lower	upper	reject
COL_0	35S::PIF4	-2254.43	0	-2586.94	-1921.91	TRUE
COL_0	phyb	-2855.93	0	-3193.16	-2518.69	TRUE
COL_0	pif3	-1567.88	0	-1900.4	-1235.36	TRUE
COL_0	pif4	19.9974	1	-312.521	352.515	FALSE
COL_0	pif7	-721.334	0	-1053.85	-388.816	TRUE
COL_0	pif7-2	-22.0164	1	-359.251	315.218	FALSE
COL_0	pif7pif3	-397.589	0.0068	-730.107	-65.0708	TRUE
COL_0	pifq	-708.632	0	-1041.15	-376.114	TRUE
35S::PIF4	phyb	-601.503	0	-934.021	-268.985	TRUE
35S::PIF4	pif3	686.544	0	358.811	1014.28	TRUE
35S::PIF4	pif4	2274.42	0	1946.69	2602.16	TRUE
35S::PIF4	pif7	1533.09	0	1205.36	1860.82	TRUE
35S::PIF4	pif7-2	2232.41	0	1899.89	2564.93	TRUE
35S::PIF4	pif7pif3	1856.84	0	1529.1	2184.57	TRUE
35S::PIF4	pifq	1545.79	0	1218.06	1873.53	TRUE
phyb	pif3	1288.05	0	955.53	1620.57	TRUE
phyb	pif4	2875.93	0	2543.41	3208.44	TRUE
phyb	pif7	2134.59	0	1802.08	2467.11	TRUE
phyb	pif7-2	2833.91	0	2496.68	3171.15	TRUE
phyb	pif7pif3	2458.34	0	2125.82	2790.86	TRUE
phyb	pifq	2147.3	0	1814.78	2479.81	TRUE
pif3	pif4	1587.88	0	1260.14	1915.61	TRUE
pif3	pif7	846.546	0	518.813	1174.28	TRUE
pif3	pif7-2	1545.86	0	1213.35	1878.38	TRUE
pif3	pif7pif3	1170.29	0	842.558	1498.03	TRUE
pif3	pifq	859.249	0	531.515	1186.98	TRUE
pif4	pif7	-741.332	0	-1069.07	-413.598	TRUE
pif4	pif7-2	-42.0138	1	-374.532	290.504	FALSE
pif4	pif7pif3	-417.586	0.0027	-745.32	-89.8529	TRUE
pif4	pifq	-728.629	0	-1056.36	-400.896	TRUE
pif7	pif7-2	699.318	0	366.8	1031.84	TRUE
pif7	pif7pif3	323.745	0.0558	-3.9879	651.479	FALSE
pif7	pifq	12.7024	1	-315.031	340.436	FALSE
pif7-2	pif7pif3	-375.572	0.014	-708.09	-43.0544	TRUE
pif7-2	pifq	-686.615	0	-1019.13	-354.097	TRUE
pif7pif3	pifq	-311.043	0.078	-638.776	16.6903	FALSE

## Sheet: ANOVA_Tukey_NC_36
group1	group2	meandiff	p-adj	lower	upper	reject
COL_0	35S::PIF4	-2244.26	0	-2563.02	-1925.5	TRUE
COL_0	phyb	-2686.68	0	-3007.85	-2365.52	TRUE
COL_0	pif3	-1460.15	0	-1776.62	-1143.68	TRUE
COL_0	pif4	-18.7851	1	-337.543	299.973	FALSE
COL_0	pif7	-700.318	0	-1016.79	-383.845	TRUE
COL_0	pif7-2	-76.5828	0.9981	-397.747	244.581	FALSE
COL_0	pif7pif3	-456.796	0.0003	-771.096	-142.496	TRUE
COL_0	pifq	-736.739	0	-1053.21	-420.266	TRUE
35S::PIF4	phyb	-442.425	0.0008	-763.589	-121.261	TRUE
35S::PIF4	pif3	784.111	0	467.638	1100.58	TRUE
35S::PIF4	pif4	2225.47	0	1906.72	2544.23	TRUE
35S::PIF4	pif7	1543.94	0	1227.47	1860.41	TRUE
35S::PIF4	pif7-2	2167.68	0	1846.51	2488.84	TRUE
35S::PIF4	pif7pif3	1787.46	0	1473.16	2101.76	TRUE
35S::PIF4	pifq	1507.52	0	1191.05	1823.99	TRUE
phyb	pif3	1226.54	0	907.64	1545.43	TRUE
phyb	pif4	2667.9	0	2346.74	2989.06	TRUE
phyb	pif7	1986.37	0	1667.47	2305.26	TRUE
phyb	pif7-2	2610.1	0	2286.55	2933.65	TRUE
phyb	pif7pif3	2229.89	0	1913.15	2546.63	TRUE
phyb	pifq	1949.95	0	1631.05	2268.84	TRUE
pif3	pif4	1441.36	0	1124.89	1757.84	TRUE
pif3	pif7	759.831	0	445.659	1074	TRUE
pif3	pif7-2	1383.57	0	1064.67	1702.46	TRUE
pif3	pif7pif3	1003.35	0	691.371	1315.33	TRUE
pif3	pifq	723.41	0	409.238	1037.58	TRUE
pif4	pif7	-681.533	0	-998.006	-365.06	TRUE
pif4	pif7-2	-57.7977	0.9998	-378.962	263.366	FALSE
pif4	pif7pif3	-438.011	0.0006	-752.31	-123.711	TRUE
pif4	pifq	-717.954	0	-1034.43	-401.481	TRUE
pif7	pif7-2	623.735	0	304.839	942.631	TRUE
pif7	pif7pif3	243.522	0.2669	-68.4595	555.504	FALSE
pif7	pifq	-36.421	1	-350.592	277.75	FALSE
pif7-2	pif7pif3	-380.213	0.0065	-696.952	-63.4738	TRUE
pif7-2	pifq	-660.156	0	-979.052	-341.26	TRUE
pif7pif3	pifq	-279.943	0.1186	-591.925	32.0386	FALSE

## Sheet: ANOVA_Tukey_NC_35
group1	group2	meandiff	p-adj	lower	upper	reject
COL_0	35S::PIF4	-2164.26	0	-2460.05	-1868.47	TRUE
COL_0	phyb	-2537.04	0	-2837.03	-2237.06	TRUE
COL_0	pif3	-1400.81	0	-1696.6	-1105.02	TRUE
COL_0	pif4	-101.529	0.9777	-397.318	194.26	FALSE
COL_0	pif7	-722.978	0	-1018.77	-427.189	TRUE
COL_0	pif7-2	-189.736	0.5614	-489.721	110.248	FALSE
COL_0	pif7pif3	-490.611	0	-786.4	-194.822	TRUE
COL_0	pifq	-799.929	0	-1095.72	-504.14	TRUE
35S::PIF4	phyb	-372.781	0.0032	-668.57	-76.9919	TRUE
35S::PIF4	pif3	763.453	0	471.92	1054.99	TRUE
35S::PIF4	pif4	2062.73	0	1771.2	2354.27	TRUE
35S::PIF4	pif7	1441.29	0	1149.75	1732.82	TRUE
35S::PIF4	pif7-2	1974.53	0	1678.74	2270.32	TRUE
35S::PIF4	pif7pif3	1673.65	0	1382.12	1965.18	TRUE
35S::PIF4	pifq	1364.33	0	1072.8	1655.87	TRUE
phyb	pif3	1136.23	0	840.445	1432.02	TRUE
phyb	pif4	2435.52	0	2139.73	2731.3	TRUE
phyb	pif7	1814.07	0	1518.28	2109.86	TRUE
phyb	pif7-2	2347.31	0	2047.32	2647.29	TRUE
phyb	pif7pif3	2046.43	0	1750.64	2342.22	TRUE
phyb	pifq	1737.12	0	1441.33	2032.9	TRUE
pif3	pif4	1299.28	0	1007.75	1590.81	TRUE
pif3	pif7	677.833	0	386.3	969.365	TRUE
pif3	pif7-2	1211.07	0	915.285	1506.86	TRUE
pif3	pif7pif3	910.199	0	618.667	1201.73	TRUE
pif3	pifq	600.882	0	309.349	892.415	TRUE
pif4	pif7	-621.449	0	-912.982	-329.916	TRUE
pif4	pif7-2	-88.2072	0.991	-383.996	207.582	FALSE
pif4	pif7pif3	-389.082	0.0013	-680.615	-97.5493	TRUE
pif4	pifq	-698.399	0	-989.932	-406.867	TRUE
pif7	pif7-2	533.242	0	237.453	829.03	TRUE
pif7	pif7pif3	232.367	0.2409	-59.1657	523.9	FALSE
pif7	pifq	-76.9506	0.9961	-368.483	214.582	FALSE
pif7-2	pif7pif3	-300.875	0.0427	-596.664	-5.0859	TRUE
pif7-2	pifq	-610.192	0	-905.981	-314.403	TRUE
pif7pif3	pifq	-309.317	0.0282	-600.85	-17.7849	TRUE

## Sheet: ANOVA_Tukey_NC_34
group1	group2	meandiff	p-adj	lower	upper	reject
COL_0	35S::PIF4	-1999.85	0	-2271.56	-1728.15	TRUE
COL_0	phyb	-2307.28	0	-2582.84	-2031.72	TRUE
COL_0	pif3	-1264.16	0	-1535.87	-992.457	TRUE
COL_0	pif4	-125.892	0.8783	-397.599	145.815	FALSE
COL_0	pif7	-645.708	0	-917.415	-374.002	TRUE
COL_0	pif7-2	-198.729	0.3744	-474.29	76.8319	FALSE
COL_0	pif7pif3	-417.72	0.0001	-689.427	-146.014	TRUE
COL_0	pifq	-797.605	0	-1069.31	-525.899	TRUE
35S::PIF4	phyb	-307.429	0.0138	-579.135	-35.722	TRUE
35S::PIF4	pif3	735.691	0	467.894	1003.49	TRUE
35S::PIF4	pif4	1873.96	0	1606.17	2141.76	TRUE
35S::PIF4	pif7	1354.15	0	1086.35	1621.94	TRUE
35S::PIF4	pif7-2	1801.13	0	1529.42	2072.83	TRUE
35S::PIF4	pif7pif3	1582.13	0	1314.34	1849.93	TRUE
35S::PIF4	pifq	1202.25	0	934.452	1470.05	TRUE
phyb	pif3	1043.12	0	771.413	1314.83	TRUE
phyb	pif4	2181.39	0	1909.68	2453.1	TRUE
phyb	pif7	1661.57	0	1389.87	1933.28	TRUE
phyb	pif7-2	2108.55	0	1832.99	2384.12	TRUE
phyb	pif7pif3	1889.56	0	1617.86	2161.27	TRUE
phyb	pifq	1509.68	0	1237.97	1781.38	TRUE
pif3	pif4	1138.27	0	870.475	1406.07	TRUE
pif3	pif7	618.455	0	350.658	886.253	TRUE
pif3	pif7-2	1065.43	0	793.728	1337.14	TRUE
pif3	pif7pif3	846.443	0	578.646	1114.24	TRUE
pif3	pifq	466.558	0	198.761	734.356	TRUE
pif4	pif7	-519.817	0	-787.614	-252.019	TRUE
pif4	pif7-2	-72.8373	0.9956	-344.544	198.869	FALSE
pif4	pif7pif3	-291.829	0.0212	-559.626	-24.0315	TRUE
pif4	pifq	-671.714	0	-939.511	-403.916	TRUE
pif7	pif7-2	446.979	0	175.273	718.686	TRUE
pif7	pif7pif3	227.988	0.167	-39.8091	495.785	FALSE
pif7	pifq	-151.897	0.7007	-419.694	115.9	FALSE
pif7-2	pif7pif3	-218.991	0.2275	-490.698	52.7155	FALSE
pif7-2	pifq	-598.876	0	-870.583	-327.17	TRUE
pif7pif3	pifq	-379.885	0.0004	-647.682	-112.088	TRUE

## Sheet: ANOVA_Tukey_NC_33
group1	group2	meandiff	p-adj	lower	upper	reject
COL_0	35S::PIF4	-1878.66	0	-2124.2	-1633.13	TRUE
COL_0	phyb	-2054.22	0	-2303.24	-1805.2	TRUE
COL_0	pif3	-1115.16	0	-1360.69	-869.619	TRUE
COL_0	pif4	-167.497	0.4541	-413.034	78.0401	FALSE
COL_0	pif7	-608.711	0	-854.248	-363.174	TRUE
COL_0	pif7-2	-252.207	0.0445	-501.226	-3.1865	TRUE
COL_0	pif7pif3	-374.708	0.0001	-620.245	-129.171	TRUE
COL_0	pifq	-789.387	0	-1034.92	-543.85	TRUE
35S::PIF4	phyb	-175.555	0.3866	-421.092	69.9818	FALSE
35S::PIF4	pif3	763.507	0	521.503	1005.51	TRUE
35S::PIF4	pif4	1711.17	0	1469.16	1953.17	TRUE
35S::PIF4	pif7	1269.95	0	1027.95	1511.96	TRUE
35S::PIF4	pif7-2	1626.46	0	1380.92	1871.99	TRUE
35S::PIF4	pif7pif3	1503.95	0	1261.95	1745.96	TRUE
35S::PIF4	pifq	1089.28	0	847.271	1331.28	TRUE
phyb	pif3	939.062	0	693.525	1184.6	TRUE
phyb	pif4	1886.72	0	1641.18	2132.26	TRUE
phyb	pif7	1445.51	0	1199.97	1691.04	TRUE
phyb	pif7-2	1802.01	0	1552.99	2051.03	TRUE
phyb	pif7pif3	1679.51	0	1433.97	1925.05	TRUE
phyb	pifq	1264.83	0	1019.29	1510.37	TRUE
pif3	pif4	947.659	0	705.655	1189.66	TRUE
pif3	pif7	506.445	0	264.441	748.449	TRUE
pif3	pif7-2	862.949	0	617.412	1108.49	TRUE
pif3	pif7pif3	740.448	0	498.444	982.452	TRUE
pif3	pifq	325.769	0.0011	83.7647	567.773	TRUE
pif4	pif7	-441.214	0	-683.218	-199.21	TRUE
pif4	pif7-2	-84.7095	0.977	-330.247	160.827	FALSE
pif4	pif7pif3	-207.211	0.1613	-449.215	34.7932	FALSE
pif4	pifq	-621.89	0	-863.894	-379.886	TRUE
pif7	pif7-2	356.505	0.0003	110.968	602.042	TRUE
pif7	pif7pif3	234.003	0.067	-8.0006	476.007	FALSE
pif7	pifq	-180.676	0.3261	-422.68	61.3279	FALSE
pif7-2	pif7pif3	-122.501	0.8263	-368.038	123.036	FALSE
pif7-2	pifq	-537.181	0	-782.718	-291.644	TRUE
pif7pif3	pifq	-414.68	0	-656.683	-172.675	TRUE

## Sheet: ANOVA_Tukey_NC_32
group1	group2	meandiff	p-adj	lower	upper	reject
COL_0	35S::PIF4	-1696.02	0	-1912.82	-1479.21	TRUE
COL_0	phyb	-1816.23	0	-2036.11	-1596.35	TRUE
COL_0	pif3	-990.711	0	-1207.52	-773.903	TRUE
COL_0	pif4	-199.922	0.0975	-416.73	16.885	FALSE
COL_0	pif7	-543.171	0	-759.978	-326.363	TRUE
COL_0	pif7-2	-278.446	0.003	-498.329	-58.563	TRUE
COL_0	pif7pif3	-317.818	0.0002	-534.625	-101.01	TRUE
COL_0	pifq	-759.546	0	-976.354	-542.739	TRUE
35S::PIF4	phyb	-120.216	0.7262	-337.023	96.5919	FALSE
35S::PIF4	pif3	705.305	0	491.618	918.993	TRUE
35S::PIF4	pif4	1496.09	0	1282.41	1709.78	TRUE
35S::PIF4	pif7	1152.84	0	939.157	1366.53	TRUE
35S::PIF4	pif7-2	1417.57	0	1200.76	1634.38	TRUE
35S::PIF4	pif7pif3	1378.2	0	1164.51	1591.89	TRUE
35S::PIF4	pifq	936.469	0	722.782	1150.16	TRUE
phyb	pif3	825.521	0	608.713	1042.33	TRUE
phyb	pif4	1616.31	0	1399.5	1833.12	TRUE
phyb	pif7	1273.06	0	1056.25	1489.87	TRUE
phyb	pif7-2	1537.79	0	1317.9	1757.67	TRUE
phyb	pif7pif3	1498.41	0	1281.61	1715.22	TRUE
phyb	pifq	1056.68	0	839.878	1273.49	TRUE
pif3	pif4	790.788	0	577.1	1004.48	TRUE
pif3	pif7	447.54	0	233.852	661.227	TRUE
pif3	pif7-2	712.265	0	495.457	929.072	TRUE
pif3	pif7pif3	672.893	0	459.205	886.58	TRUE
pif3	pifq	231.164	0.0229	17.4764	444.852	TRUE
pif4	pif7	-343.248	0	-556.936	-129.561	TRUE
pif4	pif7-2	-78.5234	0.9691	-295.331	138.284	FALSE
pif4	pif7pif3	-117.895	0.7316	-331.583	95.7922	FALSE
pif4	pifq	-559.624	0	-773.312	-345.936	TRUE
pif7	pif7-2	264.725	0.0051	47.9176	481.532	TRUE
pif7	pif7pif3	225.353	0.03	11.6652	439.041	TRUE
pif7	pifq	-216.375	0.0446	-430.063	-2.6878	TRUE
pif7-2	pif7pif3	-39.3721	0.9997	-256.18	177.435	FALSE
pif7-2	pifq	-481.101	0	-697.908	-264.293	TRUE
pif7pif3	pifq	-441.728	0	-655.416	-228.041	TRUE

## Sheet: ANOVA_Tukey_NC_31
group1	group2	meandiff	p-adj	lower	upper	reject
COL_0	35S::PIF4	-1532.95	0	-1724.99	-1340.91	TRUE
COL_0	phyb	-1529.35	0	-1724.12	-1334.59	TRUE
COL_0	pif3	-858.937	0	-1050.98	-666.897	TRUE
COL_0	pif4	-211.711	0.0186	-403.751	-19.6708	TRUE
COL_0	pif7	-433.358	0	-625.398	-241.318	TRUE
COL_0	pif7-2	-288.599	0.0002	-483.363	-93.835	TRUE
COL_0	pif7pif3	-259.674	0.001	-451.714	-67.6343	TRUE
COL_0	pifq	-712.852	0	-904.892	-520.812	TRUE
35S::PIF4	phyb	3.5917	1	-188.448	195.632	FALSE
35S::PIF4	pif3	674.009	0	484.733	863.286	TRUE
35S::PIF4	pif4	1321.24	0	1131.96	1510.51	TRUE
35S::PIF4	pif7	1099.59	0	910.312	1288.86	TRUE
35S::PIF4	pif7-2	1244.35	0	1052.31	1436.39	TRUE
35S::PIF4	pif7pif3	1273.27	0	1084	1462.55	TRUE
35S::PIF4	pifq	820.094	0	630.817	1009.37	TRUE
phyb	pif3	670.418	0	478.378	862.458	TRUE
phyb	pif4	1317.64	0	1125.6	1509.68	TRUE
phyb	pif7	1096	0	903.957	1288.04	TRUE
phyb	pif7-2	1240.76	0	1045.99	1435.52	TRUE
phyb	pif7pif3	1269.68	0	1077.64	1461.72	TRUE
phyb	pifq	816.502	0	624.462	1008.54	TRUE
pif3	pif4	647.226	0	457.949	836.503	TRUE
pif3	pif7	425.579	0	236.302	614.856	TRUE
pif3	pif7-2	570.338	0	378.298	762.378	TRUE
pif3	pif7pif3	599.263	0	409.986	788.539	TRUE
pif3	pifq	146.084	0.2816	-43.1924	335.361	FALSE
pif4	pif7	-221.647	0.009	-410.924	-32.3705	TRUE
pif4	pif7-2	-76.8883	0.9443	-268.928	115.152	FALSE
pif4	pif7pif3	-47.9635	0.997	-237.24	141.313	FALSE
pif4	pifq	-501.142	0	-690.418	-311.865	TRUE
pif7	pif7-2	144.759	0.313	-47.2812	336.799	FALSE
pif7	pif7pif3	173.684	0.1011	-15.5931	362.96	FALSE
pif7	pifq	-279.495	0.0002	-468.771	-90.2179	TRUE
pif7-2	pif7pif3	28.9248	0.9999	-163.115	220.965	FALSE
pif7-2	pifq	-424.253	0	-616.293	-232.213	TRUE
pif7pif3	pifq	-453.178	0	-642.455	-263.901	TRUE

## Sheet: ANOVA_Tukey_NC_30
group1	group2	meandiff	p-adj	lower	upper	reject
COL_0	35S::PIF4	-1331.65	0	-1501.69	-1161.6	TRUE
COL_0	phyb	-1277.12	0	-1449.57	-1104.66	TRUE
COL_0	pif3	-737.801	0	-907.843	-567.759	TRUE
COL_0	pif4	-196.03	0.0109	-366.073	-25.9881	TRUE
COL_0	pif7	-370.29	0	-540.332	-200.247	TRUE
COL_0	pif7-2	-284.948	0	-457.403	-112.494	TRUE
COL_0	pif7pif3	-224.508	0.0016	-394.551	-54.4663	TRUE
COL_0	pifq	-647.671	0	-817.713	-477.629	TRUE
35S::PIF4	phyb	54.5304	0.9855	-115.512	224.573	FALSE
35S::PIF4	pif3	593.846	0	426.25	761.441	TRUE
35S::PIF4	pif4	1135.62	0	968.021	1303.21	TRUE
35S::PIF4	pif7	961.357	0	793.761	1128.95	TRUE
35S::PIF4	pif7-2	1046.7	0	876.656	1216.74	TRUE
35S::PIF4	pif7pif3	1107.14	0	939.543	1274.73	TRUE
35S::PIF4	pifq	683.975	0	516.38	851.571	TRUE
phyb	pif3	539.315	0	369.273	709.358	TRUE
phyb	pif4	1081.09	0	911.044	1251.13	TRUE
phyb	pif7	906.827	0	736.784	1076.87	TRUE
phyb	pif7-2	992.168	0	819.713	1164.62	TRUE
phyb	pif7pif3	1052.61	0	882.565	1222.65	TRUE
phyb	pifq	629.445	0	459.403	799.487	TRUE
pif3	pif4	541.77	0	374.175	709.366	TRUE
pif3	pif7	367.511	0	199.916	535.107	TRUE
pif3	pif7-2	452.852	0	282.81	622.895	TRUE
pif3	pif7pif3	513.292	0	345.697	680.888	TRUE
pif3	pifq	90.1297	0.7584	-77.4658	257.725	FALSE
pif4	pif7	-174.259	0.0346	-341.855	-6.6638	TRUE
pif4	pif7-2	-88.918	0.7856	-258.96	81.1243	FALSE
pif4	pif7pif3	-28.4782	0.9998	-196.074	139.117	FALSE
pif4	pifq	-451.641	0	-619.236	-284.045	TRUE
pif7	pif7-2	85.3413	0.8215	-84.701	255.383	FALSE
pif7	pif7pif3	145.781	0.146	-21.8144	313.377	FALSE
pif7	pifq	-277.382	0	-444.977	-109.786	TRUE
pif7-2	pif7pif3	60.4398	0.9724	-109.602	230.482	FALSE
pif7-2	pifq	-362.723	0	-532.765	-192.68	TRUE
pif7pif3	pifq	-423.163	0	-590.758	-255.567	TRUE

[truncated: 48 more sheets: ANOVA_Tukey_NC_29, ANOVA_Tukey_NC_28, ANOVA_Tukey_NC_27, ANOVA_Tukey_NC_26, ANOVA_Tukey_NC_25, ANOVA_Tukey_NC_24, ANOVA_Tukey_NC_23, ANOVA_Tukey_NC_22, ANOVA_Tukey_NC_21, ANOVA_Tukey_NC_20, ANOVA_Tukey_NC_19, ANOVA_Tukey_NC_18, ANOVA_Tukey_NC_17, ANOVA_Tukey_NC_16, ANOVA_Tukey_NC_15, ANOVA_Tukey_NC_14, ANOVA_Tukey_NC_13, ANOVA_Tukey_NC_12, ANOVA_Tukey_NC_11, ANOVA_Tukey_NC_10 …]
