# Supplementary material for: Integrative phenotyping analyses reveal the relevance of the phyB-PIF4 pathway in Arabidopsis thaliana reproductive organs at high ambient temperature
Source: BMC Plant Biol. 2024 Jul 29;24:721. doi: 10.1186/s12870-024-05394-w (PMC11285529; doi:10.1186/s12870-024-05394-w)
Supplement: Supplementary file 8 — Additional File 3: Table S6 [file 12870_2024_5394_MOESM8_ESM.xlsx]

## Sheet: avg data
Measuring Date	Plant Info	Condition	NDVI-avg	PRI-avg	OSAVI-avg	PSRI-avg	SIPI-avg	MCARI1-avg
2022-09-06	Col-0	nAT	0.741296	0.0503485	0.780986	-0.0601143	0.68539	0.655058
2022-09-13	Col-0	nAT	0.789273	0.0533109	0.823279	-0.0471803	0.736143	0.752569
2022-09-20	Col-0	nAT	0.814727	0.0456204	0.830105	-0.0301856	0.775863	0.768508
2022-09-27	Col-0	nAT	0.81604	0.0341728	0.823294	-0.0175109	0.789804	0.745321
2022-09-06	35S::PIF4	nAT	0.674057	0.0663464	0.767051	-0.147226	0.57222	0.639425
2022-09-13	35S::PIF4	nAT	0.723225	0.0569382	0.775188	-0.0938937	0.648376	0.655833
2022-09-20	35S::PIF4	nAT	0.738727	0.037253	0.777801	-0.0594342	0.687127	0.668937
2022-09-27	35S::PIF4	nAT	0.738273	0.0337079	0.786564	-0.0503641	0.691541	0.697112
2022-09-06	phyb	nAT	0.667104	0.0529684	0.763664	-0.115878	0.591591	0.637468
2022-09-13	phyb	nAT	0.722932	0.0492578	0.79635	-0.0858212	0.657346	0.71833
2022-09-20	phyb	nAT	0.733405	0.0385847	0.791552	-0.0610958	0.678698	0.699399
2022-09-27	phyb	nAT	0.738636	0.0414994	0.78935	-0.0550034	0.682581	0.687218
2022-09-06	pif4	nAT	0.724812	0.0367364	0.755383	-0.0396186	0.680272	0.591021
2022-09-13	pif4	nAT	0.787631	0.0496275	0.815977	-0.0427763	0.736593	0.726796
2022-09-20	pif4	nAT	0.825142	0.0446376	0.834994	-0.0249283	0.789081	0.771422
2022-09-27	pif4	nAT	0.827779	0.0302784	0.829115	-0.0128684	0.80558	0.752557
2022-09-06	pifq	nAT	0.727643	0.0315302	0.738314	-0.0318836	0.691073	0.553189
2022-09-13	pifq	nAT	0.777582	0.0503962	0.809535	-0.0448417	0.726119	0.710974
2022-09-20	pifq	nAT	0.822062	0.0495537	0.833652	-0.0307498	0.781601	0.770142
2022-09-27	pifq	nAT	0.828922	0.0322493	0.829046	-0.015889	0.802671	0.754565
2022-09-06	pif3	nAT	0.727766	0.0508689	0.768008	-0.0621835	0.671691	0.622274
2022-09-13	pif3	nAT	0.78375	0.0574713	0.817708	-0.0531173	0.727334	0.729774
2022-09-20	pif3	nAT	0.80745	0.0441656	0.825246	-0.0334638	0.765888	0.74853
2022-09-27	pif3	nAT	0.800307	0.0370563	0.813397	-0.0257062	0.766064	0.717066
2022-09-06	pif7-1	nAT	0.729078	0.0332031	0.746392	-0.0282373	0.692694	0.576627
2022-09-13	pif7-1	nAT	0.78851	0.0484839	0.812081	-0.0351545	0.742739	0.712958
2022-09-20	pif7-1	nAT	0.83282	0.0395786	0.838342	-0.0204976	0.799392	0.780095
2022-09-27	pif7-1	nAT	0.84027	0.032875	0.833356	-0.0120268	0.816598	0.761941
2022-09-06	pif7-2	nAT	0.716797	0.040536	0.747745	-0.0476748	0.667128	0.581248
2022-09-13	pif7-2	nAT	0.775577	0.0504277	0.812954	-0.0458432	0.722688	0.721369
2022-09-20	pif7-2	nAT	0.823574	0.0475911	0.840543	-0.0276619	0.785745	0.79226
2022-09-27	pif7-2	nAT	0.831789	0.0334575	0.836539	-0.014068	0.807705	0.775639
2022-09-06	pif3 pif7	nAT	0.732622	0.0293957	0.757488	-0.031465	0.694082	0.587155
2022-09-13	pif3 pif7	nAT	0.783654	0.0521727	0.817523	-0.0440378	0.732474	0.729168
2022-09-20	pif3 pif7	nAT	0.829035	0.0409767	0.839814	-0.0236807	0.794259	0.783074
2022-09-27	pif3 pif7	nAT	0.831375	0.0313548	0.83304	-0.0141644	0.80672	0.760429
2022-10-18	Col-0	hAT	0.745658	0.0484489	0.757327	-0.0605299	0.694877	0.605639
2022-10-25	Col-0	hAT	0.771043	0.0501504	0.78153	-0.0460327	0.725192	0.655304
2022-11-01	Col-0	hAT	0.761306	0.0327692	0.783365	-0.0376695	0.721975	0.667955
2022-10-18	35s::PIF4	hAT	0.682905	0.0666849	0.757231	-0.137692	0.587556	0.615344
2022-10-25	35s::PIF4	hAT	0.711268	0.0618867	0.760378	-0.0991548	0.637489	0.621013
2022-11-01	35s::PIF4	hAT	0.715255	0.0367372	0.757357	-0.0642836	0.664454	0.62402
2022-10-18	phyb	hAT	0.685315	0.0475112	0.738655	-0.104483	0.618875	0.583657
2022-10-25	phyb	hAT	0.703684	0.0444669	0.737965	-0.0776111	0.650246	0.582494
2022-11-01	phyb	hAT	0.695783	0.0363755	0.745914	-0.0679664	0.645008	0.603565
2022-10-18	pif4	hAT	0.7393	0.0464675	0.760776	-0.05513	0.689262	0.608663
2022-10-25	pif4	hAT	0.770923	0.0529442	0.803277	-0.0433093	0.726262	0.69875
2022-11-01	pif4	hAT	0.779102	0.0298346	0.810673	-0.0269446	0.744177	0.71963
2022-10-18	pifQ	hAT	0.72139	0.0333412	0.731317	-0.0443098	0.682015	0.553928
2022-10-25	pifQ	hAT	0.752008	0.0528036	0.786591	-0.0515399	0.703033	0.660775
2022-11-01	pifQ	hAT	0.774274	0.036152	0.808998	-0.0386934	0.733029	0.723615
2022-10-18	pif3	hAT	0.727361	0.0505141	0.756213	-0.0687292	0.675154	0.609232
2022-10-25	pif3	hAT	0.752726	0.0513392	0.775671	-0.0585059	0.702597	0.645874
2022-11-01	pif3	hAT	0.744546	0.0403365	0.784177	-0.053994	0.697048	0.673206
2022-10-18	pif7-1	hAT	0.750106	0.0561776	0.776459	-0.0656291	0.691516	0.642484
2022-10-25	pif7-1	hAT	0.773778	0.0545196	0.814013	-0.0453523	0.726174	0.727409
2022-11-01	pif7-1	hAT	0.780313	0.0410725	0.812992	-0.0334665	0.741321	0.729408
2022-10-18	pif7-2	hAT	0.732623	0.0366943	0.75197	-0.0510181	0.687175	0.595392
2022-10-25	pif7-2	hAT	0.761682	0.0462579	0.800199	-0.040325	0.720103	0.698298
2022-11-01	pif7-2	hAT	0.769821	0.0345077	0.803439	-0.0289899	0.73598	0.711546
2022-10-18	pif3 pif7	hAT	0.742242	0.0526423	0.767215	-0.066084	0.683088	0.623688
2022-10-25	pif3 pif7	hAT	0.77316	0.0530035	0.811603	-0.0441115	0.726296	0.721786
2022-11-01	pif3 pif7	hAT	0.779048	0.0366164	0.815859	-0.0317328	0.740637	0.735917

## Sheet: NDVI stats
Age	Plant Info	T-statistic	P-value	Average (nAT)	Average (hAT)	Significance
15 DAS	35S::PIF4	-0.747252	0.463607	0.674057	0.682905	Not Significant
15 DAS	Col-0	-1.17411	0.249015	0.741296	0.745658	Not Significant
15 DAS	phyb	-2.46978	0.0194305	0.667104	0.685315	Significant
15 DAS	pif3	0.0638775	0.949465	0.727766	0.727361	Not Significant
15 DAS	pif3 pif7	-1.80097	0.0805831	0.732622	0.742242	Not Significant
15 DAS	pif4	-2.99666	0.00506887	0.724812	0.7393	Significant
15 DAS	pif7-1	-4.2575	0.000161093	0.729078	0.750106	Significant
15 DAS	pif7-2	-3.44894	0.00164271	0.716797	0.732623	Significant
15 DAS	pifq	1.1788	0.248763	0.727643	0.72139	Not Significant
22 DAS	35S::PIF4	1.69005	0.100168	0.723225	0.711268	Not Significant
22 DAS	Col-0	7.15861	3.98359e-08	0.789273	0.771043	Significant
22 DAS	phyb	2.3586	0.0246168	0.722932	0.703684	Significant
22 DAS	pif3	5.19889	9.48121e-06	0.78375	0.752726	Significant
22 DAS	pif3 pif7	2.99166	0.00513493	0.783654	0.77316	Significant
22 DAS	pif4	4.39906	0.000101781	0.787631	0.770923	Significant
22 DAS	pif7-1	4.07638	0.000260004	0.78851	0.773778	Significant
22 DAS	pif7-2	4.17469	0.000213858	0.775577	0.761682	Significant
22 DAS	pifq	5.93246	1.17681e-06	0.777582	0.752008	Significant
29 DAS	35S::PIF4	2.37205	0.0234917	0.738727	0.715255	Significant
29 DAS	Col-0	19.8835	0	0.814727	0.761306	Significant
29 DAS	phyb	6.46183	2.49409e-07	0.733405	0.695783	Significant
29 DAS	pif3	17.9348	0	0.80745	0.744546	Significant
29 DAS	pif3 pif7	20.3063	0	0.829035	0.779048	Significant
29 DAS	pif4	12.945	0	0.825142	0.779102	Significant
29 DAS	pif7-1	16.213	0	0.83282	0.780313	Significant
29 DAS	pif7-2	30.0419	0	0.823574	0.769821	Significant
29 DAS	pifq	16.2844	0	0.822062	0.774274	Significant

## Sheet: PRI stats
Age	Plant Info	T-statistic	P-value	Average (nAT)	Average (hAT)	Significance
15 DAS	Col-0	0.409767	0.684707	0.0503485	0.0484489	Not Significant
15 DAS	35S::PIF4	-0.0544308	0.957132	0.0663464	0.0666849	Not Significant
15 DAS	phyb	1.23791	0.225349	0.0529684	0.0475112	Not Significant
15 DAS	pif3	0.0888212	0.929778	0.0508689	0.0505141	Not Significant
15 DAS	pif3 pif7	-4.40818	9.90967e-05	0.0293957	0.0526423	Significant
15 DAS	pif4	-1.74391	0.0902106	0.0367364	0.0464675	Not Significant
15 DAS	pif7-1	-5.01142	1.78368e-05	0.0332031	0.0561776	Significant
15 DAS	pif7-2	0.849835	0.401933	0.040536	0.0366943	Not Significant
15 DAS	pifq	-0.299533	0.766827	0.0315302	0.0333412	Not Significant
22 DAS	Col-0	0.892028	0.379037	0.0533109	0.0501504	Not Significant
22 DAS	35S::PIF4	-1.32793	0.193048	0.0569382	0.0618867	Not Significant
22 DAS	phyb	1.4818	0.148176	0.0492578	0.0444669	Not Significant
22 DAS	pif3	1.66158	0.105791	0.0574713	0.0513392	Not Significant
22 DAS	pif3 pif7	-0.254097	0.800951	0.0521727	0.0530035	Not Significant
22 DAS	pif4	-0.942511	0.352581	0.0496275	0.0529442	Not Significant
22 DAS	pif7-1	-2.02749	0.0505089	0.0484839	0.0545196	Not Significant
22 DAS	pif7-2	1.21134	0.234635	0.0504277	0.0462579	Not Significant
22 DAS	pifq	-0.721401	0.475743	0.0503962	0.0528036	Not Significant
29 DAS	Col-0	3.19133	0.00316763	0.0456204	0.0327692	Significant
29 DAS	35S::PIF4	0.14138	0.888404	0.037253	0.0367372	Not Significant
29 DAS	phyb	0.512641	0.611617	0.0385847	0.0363755	Not Significant
29 DAS	pif3	1.34555	0.187352	0.0441656	0.0403365	Not Significant
29 DAS	pif3 pif7	1.1415	0.261637	0.0409767	0.0366164	Not Significant
29 DAS	pif4	4.43653	9.11892e-05	0.0446376	0.0298346	Significant
29 DAS	pif7-1	-0.377511	0.708141	0.0395786	0.0410725	Not Significant
29 DAS	pif7-2	3.15696	0.00346504	0.0475911	0.0345077	Significant
29 DAS	pifq	3.3856	0.00184851	0.0495537	0.036152	Significant

## Sheet: OSAVI stats
Age	Plant Info	T-statistic	P-value	Average (nAT)	Average (hAT)	Significance
15 DAS	Col-0	4.22522	0.00018527	0.780986	0.757327	Significant
15 DAS	35S::PIF4	1.08898	0.289112	0.767051	0.757231	Not Significant
15 DAS	phyb	3.91179	0.000486323	0.763664	0.738655	Significant
15 DAS	pif3	2.18853	0.0360443	0.768008	0.756213	Significant
15 DAS	pif3 pif7	-1.57097	0.12545	0.757488	0.767215	Not Significant
15 DAS	pif4	-0.907262	0.370654	0.755383	0.760776	Not Significant
15 DAS	pif7-1	-4.43556	9.62721e-05	0.746392	0.776459	Significant
15 DAS	pif7-2	-0.620081	0.539736	0.747745	0.75197	Not Significant
15 DAS	pifq	0.672826	0.506776	0.738314	0.731317	Not Significant
22 DAS	Col-0	8.29326	1.78525e-09	0.823279	0.78153	Significant
22 DAS	35S::PIF4	2.57057	0.014704	0.775188	0.760378	Significant
22 DAS	phyb	7.89812	5.17427e-09	0.79635	0.737965	Significant
22 DAS	pif3	12.1461	0	0.817708	0.775671	Significant
22 DAS	pif3 pif7	1.34026	0.189049	0.817523	0.811603	Not Significant
22 DAS	pif4	3.20929	0.00290143	0.815977	0.803277	Significant
22 DAS	pif7-1	-0.36636	0.716366	0.812081	0.814013	Not Significant
22 DAS	pif7-2	2.4572	0.0196071	0.812954	0.800199	Significant
22 DAS	pifq	4.48729	8.28389e-05	0.809535	0.786591	Significant
29 DAS	Col-0	10.5035	0	0.830105	0.783365	Significant
29 DAS	35S::PIF4	2.70644	0.010558	0.777801	0.757357	Significant
29 DAS	phyb	6.28211	4.21579e-07	0.791552	0.745914	Significant
29 DAS	pif3	11.3888	0	0.825246	0.784177	Significant
29 DAS	pif3 pif7	5.69701	2.13222e-06	0.839814	0.815859	Significant
29 DAS	pif4	7.63326	7.16827e-09	0.834994	0.810673	Significant
29 DAS	pif7-1	5.59707	2.8765e-06	0.838342	0.812992	Significant
29 DAS	pif7-2	9.17678	1.77616e-10	0.840543	0.803439	Significant
29 DAS	pifq	5.68767	2.42197e-06	0.833652	0.808998	Significant

## Sheet: PSRI stats
Age	Plant Info	T-statistic	P-value	Average (nAT)	Average (hAT)	Significance
15 DAS	Col-0	0.0858901	0.932089	-0.0601143	-0.0605299	Not Significant
15 DAS	35S::PIF4	-0.817644	0.423195	-0.147226	-0.137692	Not Significant
15 DAS	phyb	-1.66095	0.107141	-0.115878	-0.104483	Not Significant
15 DAS	pif3	1.29201	0.205607	-0.0621835	-0.0687292	Not Significant
15 DAS	pif3 pif7	5.19481	9.59773e-06	-0.031465	-0.066084	Significant
15 DAS	pif4	3.08733	0.0040035	-0.0396186	-0.05513	Significant
15 DAS	pif7-1	9.32065	0	-0.0282373	-0.0656291	Significant
15 DAS	pif7-2	0.603066	0.550852	-0.0476748	-0.0510181	Not Significant
15 DAS	pifq	1.98064	0.0579035	-0.0318836	-0.0443098	Not Significant
22 DAS	Col-0	-0.345572	0.731926	-0.0471803	-0.0460327	Not Significant
22 DAS	35S::PIF4	0.798446	0.430154	-0.0938937	-0.0991548	Not Significant
22 DAS	phyb	-1.44129	0.159218	-0.0858212	-0.0776111	Not Significant
22 DAS	pif3	1.38986	0.173604	-0.0531173	-0.0585059	Not Significant
22 DAS	pif3 pif7	0.0195478	0.984518	-0.0440378	-0.0441115	Not Significant
22 DAS	pif4	0.156374	0.876663	-0.0427763	-0.0433093	Not Significant
22 DAS	pif7-1	3.12273	0.00364827	-0.0351545	-0.0453523	Significant
22 DAS	pif7-2	-1.4869	0.146829	-0.0458432	-0.040325	Not Significant
22 DAS	pifq	1.50204	0.142597	-0.0448417	-0.0515399	Not Significant
29 DAS	Col-0	2.41961	0.0213953	-0.0301856	-0.0376695	Significant
29 DAS	35S::PIF4	0.863604	0.393857	-0.0594342	-0.0642836	Not Significant
29 DAS	phyb	1.47363	0.150058	-0.0610958	-0.0679664	Not Significant
29 DAS	pif3	7.08969	3.4405e-08	-0.0334638	-0.053994	Significant
29 DAS	pif3 pif7	3.09157	0.00395933	-0.0236807	-0.0317328	Significant
29 DAS	pif4	0.822072	0.416764	-0.0249283	-0.0269446	Not Significant
29 DAS	pif7-1	4.5781	6.01159e-05	-0.0204976	-0.0334665	Significant
29 DAS	pif7-2	0.458234	0.649881	-0.0276619	-0.0289899	Not Significant
29 DAS	pifq	2.56909	0.0149046	-0.0307498	-0.0386934	Significant

## Sheet: SIPI stats
Age	Plant Info	T-statistic	P-value	Average (nAT)	Average (hAT)	Significance
15 DAS	Col-0	-1.63673	0.111486	0.68539	0.694877	Not Significant
15 DAS	35S::PIF4	-0.995384	0.331441	0.57222	0.587556	Not Significant
15 DAS	phyb	-3.2001	0.00323775	0.591591	0.618875	Significant
15 DAS	pif3	-0.568323	0.573782	0.671691	0.675154	Not Significant
15 DAS	pif3 pif7	1.62441	0.113525	0.694082	0.683088	Not Significant
15 DAS	pif4	-1.56619	0.126564	0.680272	0.689262	Not Significant
15 DAS	pif7-1	0.220516	0.826828	0.692694	0.691516	Not Significant
15 DAS	pif7-2	-3.25989	0.00270723	0.667128	0.687175	Significant
15 DAS	pifq	1.11869	0.273129	0.691073	0.682015	Not Significant
22 DAS	Col-0	3.08468	0.00417959	0.736143	0.725192	Significant
22 DAS	35S::PIF4	1.30707	0.199959	0.648376	0.637489	Not Significant
22 DAS	phyb	0.794546	0.432731	0.657346	0.650246	Not Significant
22 DAS	pif3	4.17406	0.000196076	0.727334	0.702597	Significant
22 DAS	pif3 pif7	1.41128	0.167247	0.732474	0.726296	Not Significant
22 DAS	pif4	2.16412	0.0375707	0.736593	0.726262	Significant
22 DAS	pif7-1	4.05302	0.000278091	0.742739	0.726174	Significant
22 DAS	pif7-2	0.620729	0.539174	0.722688	0.720103	Not Significant
22 DAS	pifq	4.30975	0.000138565	0.726119	0.703033	Significant
29 DAS	Col-0	14.0538	0	0.775863	0.721975	Significant
29 DAS	35S::PIF4	1.9819	0.0556208	0.687127	0.664454	Not Significant
29 DAS	phyb	5.13074	1.25466e-05	0.678698	0.645008	Significant
29 DAS	pif3	16.4542	0	0.765888	0.697048	Significant
29 DAS	pif3 pif7	17.272	0	0.794259	0.740637	Significant
29 DAS	pif4	9.96264	0	0.789081	0.744177	Significant
29 DAS	pif7-1	16.2989	0	0.799392	0.741321	Significant
29 DAS	pif7-2	19.1943	0	0.785745	0.73598	Significant
29 DAS	pifq	13.0594	0	0.781601	0.733029	Significant

## Sheet: MCARI1 stats
Age	Plant Info	T-statistic	P-value	Average (nAT)	Average (hAT)	Significance
15 DAS	Col-0	3.95441	0.000398033	0.655058	0.605639	Significant
15 DAS	35S::PIF4	1.4108	0.173669	0.639425	0.615344	Not Significant
15 DAS	phyb	4.08052	0.000305904	0.637468	0.583657	Significant
15 DAS	pif3	1.27671	0.210892	0.622274	0.609232	Not Significant
15 DAS	pif3 pif7	-2.89729	0.00654148	0.587155	0.623688	Significant
15 DAS	pif4	-1.36778	0.180355	0.591021	0.608663	Not Significant
15 DAS	pif7-1	-5.80678	1.7043e-06	0.576627	0.642484	Significant
15 DAS	pif7-2	-1.10031	0.279667	0.581248	0.595392	Not Significant
15 DAS	pifq	-0.0413723	0.967304	0.553189	0.553928	Not Significant
22 DAS	Col-0	7.33128	2.45996e-08	0.752569	0.655304	Significant
22 DAS	35S::PIF4	2.7171	0.0102834	0.655833	0.621013	Significant
22 DAS	phyb	8.10539	2.95388e-09	0.71833	0.582494	Significant
22 DAS	pif3	9.78151	0	0.729774	0.645874	Significant
22 DAS	pif3 pif7	0.631335	0.532043	0.729168	0.721786	Not Significant
22 DAS	pif4	2.71641	0.010301	0.726796	0.69875	Significant
22 DAS	pif7-1	-1.03323	0.30879	0.712958	0.727409	Not Significant
22 DAS	pif7-2	1.69982	0.0988661	0.721369	0.698298	Not Significant
22 DAS	pifq	4.04554	0.000295601	0.710974	0.660775	Significant
29 DAS	Col-0	7.97617	4.18707e-09	0.768508	0.667955	Significant
29 DAS	35S::PIF4	2.68581	0.0111083	0.668937	0.62402	Significant
29 DAS	phyb	5.81418	1.66749e-06	0.699399	0.603565	Significant
29 DAS	pif3	8.17796	1.5376e-09	0.74853	0.673206	Significant
29 DAS	pif3 pif7	3.89296	0.000439617	0.783074	0.735917	Significant
29 DAS	pif4	5.41558	4.95514e-06	0.771422	0.71963	Significant
29 DAS	pif7-1	3.90452	0.000425387	0.780095	0.729408	Significant
29 DAS	pif7-2	6.54214	2.28094e-07	0.79226	0.711546	Significant
29 DAS	pifq	3.83193	0.00054072	0.770142	0.723615	Significant
