# Supplementary material for: Integrative phenotyping analyses reveal the relevance of the phyB-PIF4 pathway in Arabidopsis thaliana reproductive organs at high ambient temperature
Source: BMC Plant Biol. 2024 Jul 29;24:721. doi: 10.1186/s12870-024-05394-w (PMC11285529; doi:10.1186/s12870-024-05394-w)
Supplement: Supplementary file 9 — Additional File 3: Table S7 [file 12870_2024_5394_MOESM9_ESM.xlsx]

## Sheet: QYmax_stats
Age	Genotype	hAT QY_max	nAT QY_max	Difference	P-value	Significant
10 DAS	Col-0	0.818652	0.8136	0.00505163	0.863266	FALSE
10 DAS	phyb	0.787984	0.800354	-0.0123695		FALSE
10 DAS	pif3	0.784449	0.788922	-0.00447277	0.333333	FALSE
10 DAS	pif3 pif7	0.741071	0.807126	-0.0660547	0.648757	FALSE
10 DAS	pif7-1	0.819203	0.810847	0.0083565	0.033724	TRUE
10 DAS	pif7-2	0.821687	0.802823	0.0188636	0.326797	FALSE
12 DAS	Col-0	0.82524	0.810073	0.0151668	0.67937	FALSE
12 DAS	35S::PIF4	0.809254	0.781374	0.0278804		FALSE
12 DAS	phyb	0.808445	0.792476	0.0159691	0.00992171	TRUE
12 DAS	pif3	0.819721	0.805774	0.0139468	0.0155055	TRUE
12 DAS	pif3 pif7	0.816742	0.812921	0.00382118	0.00309432	TRUE
12 DAS	pif4	0.820063	0.800127	0.0199363	0.936956	FALSE
12 DAS	pif7-1	0.804372	0.798839	0.00553323	0.962148	FALSE
12 DAS	pif7-2	0.804856	0.810905	-0.00604875	0.0327203	TRUE
12 DAS	pifq	0.826373	0.803136	0.023237	0.419791	FALSE
14 DAS	Col-0	0.819557	0.818139	0.00141778	0.00885224	TRUE
14 DAS	35S::PIF4	0.801283	0.807311	-0.00602776		FALSE
14 DAS	phyb	0.819939	0.800738	0.019201	1.40083e-06	TRUE
14 DAS	pif3	0.793146	0.816284	-0.0231385	2.62295e-06	TRUE
14 DAS	pif3 pif7	0.817566	0.825503	-0.00793614	1.81078e-05	TRUE
14 DAS	pif4	0.819274	0.819199	7.54051e-05	0.178741	FALSE
14 DAS	pif7-1	0.805193	0.823033	-0.0178401		FALSE
14 DAS	pif7-2	0.825875	0.812348	0.0135273	1	FALSE
14 DAS	pifq	0.811474	0.818724	-0.00724974		FALSE
23 DAS	Col-0	0.824264	0.824043	0.000220528	0.00011447	TRUE
23 DAS	35S::PIF4	0.798354	0.813271	-0.0149171	4.83604e-06	TRUE
23 DAS	phyb	0.829492	0.809627	0.0198646		FALSE
23 DAS	pif3	0.816498	0.824664	-0.00816541	3.81438e-07	TRUE
23 DAS	pif3 pif7	0.821053	0.827844	-0.00679125	1.19464e-06	TRUE
23 DAS	pif4	0.826869	0.832087	-0.00521732	0.000329436	TRUE
23 DAS	pif7-1	0.830744	0.825434	0.00530962	0.601645	FALSE
23 DAS	pif7-2	0.830172	0.827069	0.00310281	0.000388634	TRUE
23 DAS	pifq	0.825053	0.820089	0.00496357		FALSE
32 DAS	Col-0	0.829573	0.834946	-0.00537251	7.05409e-07	TRUE
32 DAS	35S::PIF4	0.815742	0.825346	-0.00960418	2.62295e-06	TRUE
32 DAS	phyb	0.833292				FALSE
32 DAS	pif3	0.814261	0.831689	-0.0174272	3.22784e-07	TRUE
32 DAS	pif3 pif7	0.824247	0.834385	-0.010138	3.22784e-07	TRUE
32 DAS	pif4	0.831423	0.832368	-0.000944713	5.31113e-07	TRUE
32 DAS	pif7-1	0.831204	0.834275	-0.003071	4.50314e-07	TRUE
32 DAS	pif7-2	0.830558	0.832688	-0.00213001	8.41772e-07	TRUE
32 DAS	pifq	0.825512	0.827169	-0.00165707		FALSE

## Sheet: QY-Lss1 stats
Age	Plant Info	hAT_QY_Lss1	nAT_QY_Lss1	Statistic	p-value	Significant
10 DAS	Col-0	[0.37573545 0.40117823 0.43690695 0.41694449 0.3931728 0.4122129	[0.30300908 0.28466755 0.25367418 0.24755023 0.29622583 0.23230635	18.1016	0	TRUE
		0.36466539 0.40493824 0.40374858 0.40758391 0.36143411 0.37859267	0.23406522 0.24507698 0.23817827 0.2399553 0.23554149 0.24152134
		0.40310081 0.36038363 0.43691735 0.38588414 0.42086115]	0.24271023 0.26001676 0.23700042 0.21525463 0.25168926]
10 DAS	35S::PIF4	[0.36469247 0.3118189 0.44226041 0.45373333 0.42185748 0.40784723	[0.30853724 0.26573244 0.24505331 0.31683075 0.32730596 0.32094695	6.37716	4.21507e-07	TRUE
		0.36818167 0.44499633 0.34941912 0.24781791 0.45104249 0.3940891	0.2905506 0.2368225 0.27996447 0.26729799 0.25677426 0.32301806
		0.49729177 0.42409055 0.45092515 0.3523692 0.35380583]	0.29933714 0.28983 0.27382689 0.29718394]
10 DAS	phyb	[0.47954338 0.43652024 0.45305386 0.46657069 0.41614979 0.43562992	[0.19810535 0.28743818 0.32431969 0.27760312 0.33028238 0.29461373	14.099	0	TRUE
		0.45055911 0.39927369 0.47205376 0.42490089 0.42892006 0.43826795	0.28811664 0.31891881 0.24584327 0.2921511 0.30558515 0.25183037
		0.40937374 0.44189083 0.43960838 0.44105299 0.42408017 0.46366414]	0.2486434 0.32276807 0.19922676]
10 DAS	pif4	[0.41061442 0.45952059 0.38021393 0.41015996 0.36396472 0.39692667	[0.27007341 0.22144729 0.26439197 0.17754814 0.22998524 0.24044637	17.3406	0	TRUE
		0.41443059 0.42453903 0.3824356 0.43001503 0.36539258 0.37867056	0.23102566 0.1843225 0.22622516 0.22594266 0.26220247 0.25783935
		0.36367864 0.35552383 0.40522536 0.38436333 0.42625255 0.40331521]	0.25380722 0.20787007 0.19919843 0.24069259]
10 DAS	pifq	[0.4143727 0.45752371 0.48130054 0.26751921 0.40660298 0.30729807	[0.32321458 0.34268221 0.35475122 0.25799388 0.24725876 0.2803977	5.6928	3.2996e-06	TRUE
		0.45483865 0.39753007 0.39448911 0.4576279 0.29572037 0.4417097	0.17840794 0.16257997 0.10080012 0.23026882 0.20607789 0.28288258
		0.42412108 0.4237009 0.26815909 0.34649529]	0.2850227 0.27980674 0.19385874 0.27269676]
10 DAS	pif3	[0.37024893 0.45192528 0.35893788 0.45914757 0.43571763 0.39125844	[0.3921026 0.32738499 0.36936394 0.34969229 0.27197656 0.26626469	6.00616	1.37049e-06	TRUE
		0.48149703 0.44527061 0.43070009 0.32355144 0.37849229 0.36811907	0.25482274 0.23528223 0.29032473 0.22265374 0.23455833 0.25570498
		0.4431391 0.25248036 0.38027636]	0.25645675 0.18866821 0.23886705 0.28115606 0.26066126]
10 DAS	pif7-1	[0.44388164 0.42282936 0.44056729 0.39968029 0.39875234 0.33737416	[0.32026126 0.3792251 0.44142178 0.38934035 0.35990157 0.24726858	6.26541	4.42698e-07	TRUE
		0.43984071 0.40412054 0.3863188 0.32584935 0.3937309 0.4052758	0.2558427 0.19905166 0.18891725 0.27026129 0.29054469 0.29483917
		0.40538492 0.38687153 0.40379509 0.37903853 0.40962667 0.4253993 ]	0.20799895 0.25108102 0.26197342 0.23023901 0.23674951]
10 DAS	pif7-2	[0.40240722 0.4276285 0.36528425 0.3984841 0.36350506 0.35849314	[0.22187319 0.34731041 0.28769881 0.28539289 0.24000953 0.14993296	5.04154	1.9067e-05	TRUE
		0.21649918 0.30394292 0.28930368 0.35021531 0.33602474 0.38632792	0.19714491 0.2581289 0.23272976 0.23979575 0.28717819 0.25034219
		0.34409218 0.36490235 0.18896748 0.38904067 0.41805577]	0.26763273 0.20254087 0.25316227 0.24580004]
10 DAS	pif3 pif7	[0.39429773 0.39722251 0.40641605 0.38760001 0.4064866 0.40639049	[0.38930855 0.34743884 0.29876402 0.37993706 0.29149216 0.35673657	7.68364	6.20809e-09	TRUE
		0.39556058 0.43394253 0.34314092 0.3343073 0.38079495 0.39274566	0.26943193 0.24612157 0.23889744 0.23356991 0.16340728 0.24479816
		0.36016611 0.40727458 0.40725364 0.41320007 0.43502595 0.40536088]	0.21572699 0.25780488 0.24101263 0.26111935 0.2075747 0.28484102]
12 DAS	Col-0	[0.44169812 0.43590738 0.44539362 0.42507183 0.4547412 0.43776729	[0.26777059 0.25517115 0.2706534 0.3009886 0.23597133 0.30420375	23.2697	0	TRUE
		0.44821883 0.4301411 0.45270683 0.43530982 0.44955058 0.44443164	0.29472141 0.25596245 0.29182052 0.29754161 0.30122259 0.25924289
		0.47082977 0.46240339 0.4705895 0.43523966 0.41815768]	0.26111211 0.24342673 0.20362534 0.25825427 0.25264885]
12 DAS	35S::PIF4	[0.46225935 0.3871433 0.43493966 0.38488264 0.45227393 0.43187079	[0.19653006 0.27080713 0.29613946 0.19361428 0.15222409 0.24358263	8.08379	3.13082e-09	TRUE
		0.41907137 0.39492018 0.20740461 0.34871656 0.42292102 0.37231512	0.25852466 0.23885584 0.28620183 0.277239 0.27383802 0.29932657
		0.45435191 0.38480707 0.40115103 0.34139972]	0.30121815 0.25541458 0.21738661 0.27094755 0.23519327 0.25249515]
12 DAS	phyb	[0.45292664 0.49584017 0.43835847 0.45039228 0.43203494 0.46959644	[0.20373241 0.25722892 0.24471796 0.2627329 0.24260064 0.19770608	17.3073	0	TRUE
		0.41860732 0.41811429 0.44597793 0.41793742 0.39734095 0.42266766	0.26697298 0.29694825 0.29698833 0.30240539 0.29686707 0.28770149
		0.42413266 0.43154016 0.44489336 0.43618614 0.41472166 0.46972933]	0.32872785 0.27321525 0.24617234 0.23837646 0.23569943 0.28868528]
12 DAS	pif4	[0.45022942 0.45291416 0.39812047 0.42398954 0.43750603 0.41884133	[0.22857316 0.25286664 0.25187072 0.2328057 0.26132057 0.27206346	19.0676	0	TRUE
		0.41674655 0.45386632 0.47062213 0.44264228 0.41924329 0.44231464	0.34294305 0.30609838 0.27719028 0.28288751 0.25500434 0.22979815
		0.4397818 0.43640683 0.44249228 0.44276966 0.40362041 0.38347169]	0.21798368 0.26665836 0.24057611 0.21925048 0.25424904 0.22418454]
12 DAS	pifq	[0.47541613 0.46899884 0.42545692 0.39378163 0.41794548 0.26463377	[0.28383063 0.24189446 0.24793349 0.13783138 0.20585542 0.26223355	9.27421	0	TRUE
		0.48028636 0.44983366 0.48461493 0.48565644 0.39345028 0.46427487	0.28654941 0.32264024 0.36447627 0.35909892 0.28238957 0.25631282
		0.46490308 0.49625572 0.47619301 0.38939367 0.39322987 0.41246283]	0.29008644 0.28743669 0.23837926 0.23198958 0.23017665 0.25195498]
12 DAS	pif3	[0.46979981 0.44821407 0.40836176 0.4314186 0.44877885 0.450421	[0.22838357 0.2789662 0.22477407 0.28136324 0.27687818 0.37062124	9.59001	0	TRUE
		0.40920568 0.40919807 0.4985504 0.45443158 0.48722719 0.49102702	0.32430351 0.3176984 0.36682544 0.35629613 0.34758206 0.24594164
		0.44062432 0.42096384 0.4379829 0.45936215 0.33707026 0.37117564]	0.33321447 0.29452192 0.24908783 0.3017073 0.2493543 0.23758002]
12 DAS	pif7-1	[0.4521582 0.46840161 0.47236522 0.46443047 0.39978202 0.44777608	[0.29114859 0.23004353 0.27996281 0.2847532 0.29641068 0.25749238	10.9849	0	TRUE
		0.48451598 0.46722538 0.42740003 0.46606778 0.25195599 0.4582609	0.29952724 0.33168094 0.29494837 0.29926484 0.2760155 0.27045659
		0.44959003 0.36122453 0.45738001 0.44845303 0.41907892 0.44397034]	0.3093986 0.22796255 0.22557949 0.22861501 0.23951132 0.25094701]
12 DAS	pif7-2	[0.4367318 0.45174106 0.38472486 0.45022541 0.41449317 0.4414376	[0.22426396 0.24382523 0.254031 0.2797078 0.32600222 0.29972748	12.2889	0	TRUE
		0.36331363 0.41370611 0.38206823 0.45226439 0.4110011 0.41714467	0.27433525 0.35932129 0.29289064 0.30090412 0.2538355 0.24226183
		0.4428555 0.38722835 0.41921791 0.39561411 0.39329506]	0.26438959 0.21943316 0.25865423 0.19474262 0.2185604 ]
12 DAS	pif3 pif7	[0.45927913 0.40467834 0.44772433 0.4322129 0.380714 0.40730646	[0.24414352 0.28778513 0.26240484 0.26290512 0.28757181 0.19495136	13.7726	0	TRUE
		0.3801702 0.43724054 0.33040436 0.36204681 0.43285938 0.42611648	0.25089435 0.27427493 0.22931946 0.24415541 0.26620332 0.26831773
		0.41840284 0.34729121 0.44447149 0.41143315 0.42458135 0.41676691]	0.25663794 0.29030593 0.30132167 0.3052317 0.25386048 0.22639503]
14 DAS	Col-0	[0.41340279 0.44639909 0.43486133 0.45025861 0.41667693 0.42494446	[0.31609915 0.32007721 0.34034264 0.30152201 0.27397383 0.37402542	13.0346	0	TRUE
		0.41744625 0.47850866 0.45525641 0.46193484 0.48069052 0.44294625	0.34487223 0.32159837 0.35388245 0.33339326 0.35453469 0.3373141
		0.42164252 0.42920916 0.43652594 0.42658634 0.42782963]	0.3266866 0.33776398 0.27618134 0.28697302 0.26764807]
14 DAS	35S::PIF4	[0.39856788 0.46287428 0.42127445 0.36804948 0.42414053 0.38476871	[0.2393142 0.27077045 0.30072357 0.23525259 0.21066123 0.28106749	12.6049	0	TRUE
		0.38339647 0.40227376 0.42864231 0.41803016 0.37814609 0.4072715	0.29389971 0.26326855 0.24626866 0.22505112 0.25447832 0.25709544
		0.40902622 0.42794345 0.2726443 0.37726075 0.42555069]	0.25090419 0.25262066 0.27205893 0.22107099 0.24174892]
14 DAS	phyb	[0.4218334 0.45179966 0.43852414 0.44770044 0.4427175 0.33641618	[0.27589794 0.27993037 0.25382248 0.28331696 0.28214811 0.21223935	16.7131	0	TRUE
		0.44012685 0.41562248 0.41479797 0.43261076 0.42329295 0.41242271	0.2616669 0.26526063 0.31452226 0.30283391 0.32546617 0.29093187
		0.41108244 0.44063968 0.40369223 0.42766486 0.45280672 0.4404919 ]	0.29132545 0.2469827 0.24873644 0.27700246 0.23579344 0.26860899]
14 DAS	pif4	[0.42651939 0.44908629 0.36053878 0.42916562 0.45110441 0.41075874	[0.30933561 0.29908504 0.2690965 0.27530801 0.30107616 0.37126145	12.2541	0	TRUE
		0.4163545 0.40177786 0.4247739 0.43309497 0.42701022 0.47461389	0.35455116 0.36407549 0.30833158 0.34689202 0.28923067 0.32784684
		0.47373547 0.44559535 0.43178399 0.46053905 0.42398494 0.44490415]	0.29081814 0.33926608 0.28605983 0.27969199 0.28094169 0.27438391]
14 DAS	pifq	[0.4558816 0.36849418 0.39769406 0.42170965 0.42398479 0.40861535	[0.27351225 0.31500688 0.34366235 0.24662015 0.27905487 0.26975617	8.03488	3.57241e-09	TRUE
		0.45336727 0.44349741 0.41555267 0.40866464 0.47062663 0.47520703	0.26200241 0.37386362 0.37052923 0.32411153 0.2963094 0.37847369
		0.47301189 0.37877813 0.43308789 0.32189619]	0.34075748 0.31621682 0.30288114 0.3104733 0.27907259 0.27019932]
14 DAS	pif3	[0.35997699 0.39485806 0.42050303 0.49056928 0.47896082 0.49469462	[0.29222561 0.30774263 0.2802582 0.30825514 0.28199369 0.37534476	6.83229	7.30332e-08	TRUE
		0.48413507 0.47335413 0.45914979 0.42424545 0.45842083 0.42510999	0.35913392 0.38778494 0.34435112 0.38123086 0.37727227 0.30082393
		0.32101165 0.41839041 0.38489824 0.40102341 0.41933463 0.37688184]	0.36250865 0.33246338 0.29110143 0.31198976 0.29215657 0.26672342]
14 DAS	pif7-1	[0.44950557 0.47483182 0.42101055 0.43555269 0.43219954 0.49170918	[0.32878954 0.29869522 0.32048354 0.32634604 0.31788867 0.31320344	10.8653	0	TRUE
		0.42854416 0.48289055 0.44245717 0.45453806 0.34758814 0.4526624	0.37940128 0.3592597 0.36509053 0.35374029 0.35475112 0.30333553
		0.47335734 0.40487009 0.46288473 0.47334045 0.45464448 0.4275923 ]	0.32151062 0.27687807 0.32315038 0.26544298 0.26969723]
14 DAS	pif7-2	[0.43837723 0.40129933 0.42346169 0.42066658 0.40617227 0.38231395	[0.27958676 0.28165544 0.26609416 0.29521935 0.33875546 0.29463165	16.6675	0	TRUE
		0.3644562 0.43776636 0.43326549 0.43820281 0.43635726 0.42688701	0.32244421 0.31518401 0.33308715 0.26604412 0.30522217 0.30053812
		0.43854648 0.43461242 0.40807071 0.43767386 0.42900547]	0.29788086 0.27554986 0.30543397 0.28775784 0.27845923]
14 DAS	pif3 pif7	[0.44294595 0.44826576 0.46492425 0.46588378 0.38959354 0.37087345	[0.28654914 0.37156105 0.31277384 0.32072621 0.33432704 0.28927336	10.9144	0	TRUE
		0.40207572 0.40167438 0.42999134 0.46067885 0.40771401 0.44855139	0.29477371 0.29010946 0.26629405 0.2643762 0.29323127 0.25865579
		0.42227411 0.38636046 0.39505782 0.44689598 0.44427135 0.43236386]	0.28000985 0.35813829 0.37292617 0.33111804 0.31819908 0.28228522]
16 DAS	Col-0	[0.41390792 0.44280928 0.43185395 0.44778869 0.41651511 0.41831745	[0.31044943 0.31129176 0.31837549 0.2916063 0.26050053 0.29696013	19.264	0	TRUE
		0.4424882 0.43440481 0.43353068 0.46510646 0.44096392 0.4495804	0.28970129 0.3548908 0.3351442 0.29463999 0.31210711 0.33085373
		0.43332575 0.43629232 0.44544265 0.41860155 0.44099821]	0.34278485 0.31760215 0.30974115 0.33059785 0.31293507]
16 DAS	35S::PIF4	[0.39054709 0.36676652 0.41652485 0.35426251 0.39700893 0.36636444	[0.25272175 0.26941435 0.26499554 0.22236208 0.28769638 0.268122	13.8393	0	TRUE
		0.41343196 0.43211 0.41059155 0.41664779 0.34222981 0.39614349	0.28292847 0.30440454 0.2948619 0.24396529 0.2328926 0.20990628
		0.40495194 0.37136123 0.38855461 0.40311429]	0.22630875 0.18222789 0.26855478 0.26236096 0.27282128 0.23644526]
16 DAS	phyb	[0.3971313 0.42933771 0.4379194 0.45499526 0.4301039 0.44431667	[0.25510545 0.27798151 0.27406834 0.28779103 0.33072954 0.32727226	19.1719	0	TRUE
		0.43796108 0.42325496 0.46131133 0.42400019 0.43708364 0.44416446	0.28652666 0.23148125 0.26407988 0.21841148 0.24063065 0.30351165
		0.39938257 0.43292107 0.42057002 0.43090412 0.45951457 0.45951924]	0.27680047 0.25651653 0.29071501 0.27680537 0.26215057]
16 DAS	pif4	[0.42478332 0.43800332 0.43768106 0.41940791 0.4305978 0.43292405	[0.28621685 0.3301856 0.27224681 0.29650265 0.30629085 0.33990147	19.2346	0	TRUE
		0.39919553 0.44543042 0.46696057 0.44360328 0.44263109 0.44859194	0.33573337 0.32099599 0.34793621 0.27891612 0.33127921 0.29315887
		0.46282721 0.42289162 0.43614117 0.46194643 0.43728972 0.45250315]	0.31813233 0.32701713 0.31976867 0.30880188 0.33041867 0.29499102]
16 DAS	pifq	[0.48372856 0.37005585 0.41706186 0.42066294 0.44514282 0.43141725	[0.28886044 0.31003307 0.31054439 0.28816581 0.25628639 0.26456882	11.8324	0	TRUE
		0.44921142 0.44989688 0.40157307 0.46954174 0.46451537 0.47459699	0.29734903 0.3381125 0.32661779 0.36842056 0.30135112 0.29848833
		0.47826918 0.4181433 0.38724561 0.46238461 0.36319017]	0.30878804 0.30475639 0.32105094 0.32444248 0.30818886 0.27799314]
16 DAS	pif3	[0.40061726 0.39926979 0.46815553 0.46823236 0.48038043 0.44658643	[0.32233725 0.29175182 0.30191181 0.296883 0.3027303 0.31114277	8.76443	3.0503e-10	TRUE
		0.48246372 0.477783 0.46910818 0.43871373 0.47131296 0.43934794	0.29939584 0.33522021 0.2894909 0.33095913 0.34038174 0.37706496
		0.27611086 0.42742118 0.41502712 0.40541508 0.40624576 0.3712202 ]	0.2903295 0.32951143 0.33036654 0.30104163 0.30471226 0.30738633]
16 DAS	pif7-1	[0.45926725 0.46131311 0.41110026 0.43022009 0.44783235 0.45352753	[0.29684916 0.3166604 0.29039288 0.34089082 0.21249272 0.29943791	14.095	0	TRUE
		0.43415898 0.45384683 0.43298779 0.428237 0.39716505 0.45177947	0.34726388 0.34476555 0.33115716 0.34314151 0.31842202 0.34567236
		0.46315786 0.41737856 0.45823453 0.45787552 0.44924965 0.42473377]	0.32527641 0.30609767 0.32714175 0.30798146 0.3237979 0.27546869]
16 DAS	pif7-2	[0.43533648 0.41310567 0.40621541 0.39726796 0.38490612 0.36905595	[0.32617496 0.29946307 0.30084678 0.30153252 0.30615043 0.36184295	14.3132	0	TRUE
		0.45754293 0.437405 0.42370155 0.43831521 0.43866785 0.42782114	0.31299537 0.33725026 0.29729161 0.28970951 0.31854771 0.31941643
		0.44318073 0.44558117 0.40554909 0.43975441 0.41970625]	0.29640604 0.33039518 0.26613867 0.27852486 0.30600917]
16 DAS	pif3 pif7	[0.4307588 0.44272285 0.4642898 0.44110933 0.40852169 0.38947358	[0.29118636 0.30125345 0.28992062 0.2753784 0.34080509 0.358462	17.898	0	TRUE
		0.43371554 0.42599062 0.451043 0.42249652 0.43986592 0.44959257	0.31042126 0.3219696 0.31256801 0.31039045 0.30125469 0.28704211
		0.43032845 0.40372517 0.43410627 0.43724979 0.44503562 0.4333713 ]	0.31985217 0.30461553 0.3417606 0.32485943 0.30577421 0.33900139]
23 DAS	Col-0	[0.44077908 0.47251795 0.47049258 0.45830919 0.45298679 0.46258048	[0.35906719 0.39923481 0.38831854 0.39224472 0.40643556 0.38484301	14.5531	0	TRUE
		0.4629874 0.45878607 0.46852225 0.47668114 0.46550252 0.44830215	0.39738059 0.38439443 0.36665825 0.38121741 0.35271249 0.37109823
		0.45382509 0.45220065 0.44779647 0.43890995 0.45870241]	0.35920041 0.35367159 0.35576186 0.34021766 0.33075188]
23 DAS	35S::PIF4	[0.42563183 0.44443418 0.44790052 0.42997306 0.45098963 0.4267369	[0.35049027 0.3617631 0.34227564 0.34818147 0.33398715 0.35311847	10.4838	0	TRUE
		0.40132389 0.42842868 0.42870037 0.36223031 0.42030718 0.39830431	0.36010402 0.35657865 0.33763682 0.36313113 0.33124223 0.32013668
		0.42023567 0.43924876 0.46014628 0.42157832 0.35748896 0.43343587]	0.28718299 0.31384472 0.30900339 0.32030105 0.34569337 0.3148133 ]
23 DAS	phyb	[0.45123419 0.42895349 0.44057937 0.45835204 0.47221625 0.45496151	[0.36442328 0.36804203 0.33921554 0.32299795 0.36551603 0.36610016	14.7321	0	TRUE
		0.43908259 0.43250481 0.45263411 0.48286337 0.4502874 0.41577365	0.35018243 0.35395958 0.32096133 0.29790142 0.30794447 0.31064952
		0.44156871 0.4328306 0.45921592 0.4497344 ]	0.29242866 0.34976704 0.31343674 0.29433181 0.32094382]
23 DAS	pif4	[0.45935222 0.47686068 0.45436671 0.4515794 0.47071238 0.47074891	[0.40479177 0.3870116 0.37861107 0.3853972 0.40362115 0.39138795	12.6199	0	TRUE
		0.4473569 0.47475135 0.4687315 0.47904962 0.43139014 0.45754481	0.39085466 0.38855625 0.3654795 0.40184897 0.33782164 0.3493158
		0.47836977 0.45843211 0.4365526 0.47455885 0.45554896 0.47403572]	0.3189354 0.37264606 0.35631967 0.3154787 0.36683398 0.35756148]
23 DAS	pifq	[0.4879974 0.45209518 0.45983498 0.46051114 0.48226156 0.44378736	[0.34469184 0.35853245 0.3545301 0.40119791 0.36880211 0.34246132	13.2638	0	TRUE
		0.48306244 0.47029388 0.44711825 0.48115031 0.46294758 0.47351569	0.39280585 0.39326495 0.37320198 0.38294415 0.40234726 0.36510644
		0.46546913 0.44206574 0.45032343 0.48616444 0.40577156]	0.33902188 0.3534707 0.35938402 0.35158189 0.34128684 0.3278041 ]
23 DAS	pif3	[0.45592457 0.45386036 0.49845009 0.48738156 0.48919401 0.43390298	[0.39334621 0.38821778 0.40697641 0.39498213 0.3730657 0.41622134	6.20666	4.6492e-07	TRUE
		0.4861045 0.49248702 0.48384567 0.45060045 0.47178959 0.44490899	0.38477009 0.43618748 0.39225127 0.34625572 0.3861308 0.34367379
		0.31658476 0.43971078 0.4070874 0.42841261 0.44915743 0.44278855]	0.3607891 0.36291526 0.37204263 0.35711579 0.33343738 0.36755294]
23 DAS	pif7-1	[0.48296051 0.48224695 0.45144756 0.46012189 0.4612938 0.46298946	[0.37767312 0.39071157 0.38985765 0.37489912 0.38194051 0.40356537	13.9795	0	TRUE
		0.43358727 0.45681207 0.44004251 0.44462122 0.45565443 0.45927126	0.39928047 0.36906037 0.40799072 0.35588892 0.37923132 0.36175159
		0.45856272 0.45080754 0.46404681 0.46986828 0.46595665 0.45007658]	0.38304736 0.33333456 0.33527715 0.3866595 0.39578214 0.37279388]
23 DAS	pif7-2	[0.46105522 0.43959364 0.45038449 0.44018549 0.40895159 0.40660864	[0.36464918 0.36584017 0.36463322 0.36580859 0.35351114 0.38318616	12.6225	0	TRUE
		0.45638907 0.45624439 0.4320192 0.43647206 0.44556978 0.42997764	0.3709415 0.37851687 0.38061393 0.37219786 0.3540243 0.36455295
		0.45726494 0.45861384 0.43673686 0.44549622 0.44997539]	0.34129675 0.38106922 0.36649606 0.31011261 0.31481485]
23 DAS	pif3 pif7	[0.46038825 0.47007989 0.47519765 0.46571682 0.4584918 0.44537645	[0.40196478 0.37395791 0.38882717 0.35669294 0.39578931 0.36971935	14.0822	0	TRUE
		0.45142074 0.43269436 0.44389395 0.42945064 0.4443834 0.44878842	0.36144131 0.33262082 0.3612898 0.33130825 0.34219933 0.36218976
		0.44185401 0.41700041 0.44449388 0.44739869 0.461293 0.45838058]	0.36306474 0.34235274 0.36753264 0.37426725 0.32171997 0.37205129]
30 DAS	Col-0	[0.49723643 0.5033193 0.49721814 0.48139762 0.47399903 0.48258202	[0.4112927 0.38763052 0.4182055 0.40167024 0.42993958 0.39194987	14.2195	0	TRUE
		0.47926364 0.49100725 0.49291066 0.51151375 0.50260321 0.4823287	0.42626779 0.41435218 0.38548703 0.36824479 0.37720131 0.36614147
		0.4539856 0.4871901 0.48917106 0.49119478 0.45099497]	0.38134511 0.37015757 0.35372668 0.3901555 0.37411722]
30 DAS	35S::PIF4	[0.50964896 0.51771583 0.48117526 0.48355051 0.47434794 0.50325535	[0.32822166 0.34305837 0.36678788 0.41045999 0.38465006 0.37569796	17.0596	0	TRUE
		0.47518345 0.49150233 0.45753777 0.44997997 0.51125389 0.4878674	0.35187404 0.38003419 0.34966285 0.37787657 0.36014181 0.35740365
		0.48985425 0.48114147 0.47907939 0.44978393 0.476452 0.47714518]	0.34897951 0.38393632 0.34557962 0.31355431 0.32687096 0.36169848]
30 DAS	phyb	[0.47834553 0.47013857 0.51791335 0.46148697 0.49558818 0.49945596	[0.33476748 0.36587226 0.36972622 0.36066765 0.35579111 0.32642053	12.8313	0	TRUE
		0.53135479 0.50281752 0.51915231 0.50108601 0.47586615 0.49567687	0.37336919 0.35358685 0.35379436 0.36399877 0.45420452 0.40502527
		0.4669091 0.48006991 0.44921725 0.48625063 0.44471373 0.46587617]	0.38280779 0.37696894 0.37727021 0.38523422 0.33905099]
30 DAS	pif4	[0.51412333 0.5110556 0.48684565 0.50062795 0.51692056 0.4943223	[0.3801051 0.42910685 0.41041942 0.40821303 0.41022098 0.41288395	16.4504	0	TRUE
		0.49336445 0.5100574 0.50502773 0.48387423 0.53414471 0.4867084	0.42796406 0.41769274 0.42939843 0.39086005 0.38716884 0.38687831
		0.51073427 0.50068126 0.49455884 0.49417998 0.48684585 0.49818163]	0.38279587 0.36826743 0.39442941 0.348823 0.3618037 0.37824752]
30 DAS	pifq	[0.5096538 0.50752044 0.4834861 0.50933537 0.51192776 0.495588	[0.40596461 0.4108002 0.41871322 0.39240933 0.40920462 0.4348413	13.3986	0	TRUE
		0.5097135 0.48976864 0.50801063 0.55279519 0.53369461 0.49969637	0.40550818 0.39312854 0.4167999 0.3740965 0.40374645 0.4023306
		0.4922694 0.48007363 0.48868333 0.47788655 0.43056827]	0.37844985 0.39468292 0.39426133 0.38316971 0.36415977 0.36852047]
30 DAS	pif3	[0.48797904 0.48871733 0.47533503 0.47994473 0.56278856 0.56132947	[0.42047538 0.42647369 0.41964823 0.40010939 0.40989096 0.41913815	7.20995	2.42548e-08	TRUE
		0.55979793 0.47552187 0.48215937 0.50477048 0.40779627 0.51348327	0.39076846 0.40606543 0.39037331 0.39981242 0.48172758 0.44973651
		0.4737501 0.4877355 0.4695359 0.50475049 0.46139623 0.44637902]	0.4332193 0.38894725 0.39211216 0.39825967 0.39335672 0.37900439]
30 DAS	pif7-1	[0.5263604 0.52610176 0.51792998 0.51944105 0.54646139 0.5033515	[0.39938357 0.40924891 0.39701606 0.41538282 0.42210667 0.40652878	22.2364	0	TRUE
		0.51836554 0.53039375 0.51658995 0.51850653 0.52004078 0.52545067	0.41829895 0.40544509 0.3910314 0.40713932 0.3969404 0.38382843
		0.51934758 0.50322086 0.51312751 0.48930285 0.47038213 0.49764288]	0.39405312 0.4056514 0.36226819 0.39760759 0.39992828 0.39930405]
30 DAS	pif7-2	[0.49748259 0.50154253 0.50396977 0.50045451 0.54399207 0.49462095	[0.40909632 0.42540323 0.38824196 0.40350958 0.42836515 0.37956167	14.9308	0	TRUE
		0.50229011 0.52279555 0.46658294 0.47782386 0.48153018 0.49439046	0.38209411 0.38977013 0.40717168 0.39558485 0.38123256 0.37388646
		0.48093433 0.46632272 0.46943946 0.47852475 0.49057627]	0.39300758 0.3851326 0.37967193 0.35368099 0.36615815]
30 DAS	pif3 pif7	[0.49467868 0.50311539 0.50814731 0.49876347 0.4919945 0.50118685	[0.41037346 0.41741677 0.4101433 0.42714576 0.41960138 0.40711259	17.8026	0	TRUE
		0.50189226 0.47064707 0.49661212 0.53436789 0.51984563 0.50797978	0.37020488 0.3658116 0.38904788 0.39965564 0.38197907 0.37939346
		0.48077637 0.47741138 0.50603947 0.51538042 0.49241812 0.50149843]	0.37044058 0.38090168 0.38077597 0.37457159 0.35597855 0.40531519]
32 DAS	Col-0	[0.46881243 0.48634819 0.48888849 0.47933511 0.48768345 0.45791954	[0.39721534 0.38162808 0.4053147 0.40004455 0.42066804 0.38385636	13.5904	0	TRUE
		0.45876326 0.49728993 0.50614603 0.49967549 0.4948212 0.47364539	0.41429108 0.41241478 0.38813062 0.37570339 0.37771802 0.36461504
		0.4560834 0.45217694 0.44132222 0.46157255 0.46528736]	0.37794055 0.36976616 0.35451664 0.38668085 0.37509488]
32 DAS	35S::PIF4	[0.4886119 0.4441411 0.49141925 0.49182227 0.48766248 0.48855476	[0.33756119 0.31884993 0.34954137 0.35225505 0.38378514 0.38553776	7.58363	8.26128e-09	TRUE
		0.46046492 0.45817298 0.47060313 0.46480852 0.4809917 0.45974077	0.35493267 0.3523369 0.34822823 0.36942912 0.35911079 0.33238975
		0.46015611 0.45775647 0.45669732 0.42887056 0.24877381 0.45577329]	0.36204621 0.38200577 0.34043207 0.31048952 0.34369912 0.30220732]
32 DAS	phyb	[0.4589435 0.50654445 0.49770244 0.49529294 0.49410503 0.44076155	[0.33288715 0.38730268 0.37037374 0.37729712 0.34648792 0.35970408	10.9096	0	TRUE
		0.45925951 0.48834353 0.47102941 0.46611532 0.45683531 0.44592962	0.38220277 0.36420611 0.36861906 0.38031579 0.44954556 0.38273385
		0.45969192 0.46960286 0.4374294 0.45628902 0.47398207 0.4276533 ]	0.40881659 0.3727456 0.39741112 0.37146435 0.34443204]
32 DAS	pif4	[0.47771034 0.48659368 0.50107258 0.48872141 0.48803285 0.47011741	[0.37437992 0.39866888 0.41105669 0.40635709 0.40781302 0.40356363	14.2238	0	TRUE
		0.49655867 0.49478848 0.4762434 0.49369407 0.52141776 0.48752599	0.43319788 0.41935382 0.41845436 0.39039891 0.38040945 0.38989332
		0.48679654 0.49190127 0.44338231 0.47391557 0.48286788 0.47612119]	0.3732863 0.36347344 0.38762756 0.34479108 0.36594349 0.36786299]
32 DAS	pifq	[0.49453291 0.48163723 0.4656217 0.47818016 0.50312162 0.47746092	[0.40349556 0.40418766 0.40722412 0.38630764 0.40540966 0.43690329	13.017	0	TRUE
		0.49572281 0.46513886 0.47872207 0.52369757 0.48418917 0.51339029	0.39985169 0.38399207 0.39809406 0.37407091 0.39322283 0.39269484
		0.48706734 0.49868177 0.45206837 0.46143654 0.43461077]	0.3740095 0.38172736 0.38338868 0.37113077 0.35343563 0.35808777]
32 DAS	pif3	[0.45067333 0.48852272 0.43398456 0.46590279 0.51297783 0.50961385	[0.41664083 0.41551712 0.41729684 0.40727514 0.41787546 0.41618087	5.41437	4.97323e-06	TRUE
		0.49629778 0.51465028 0.44342335 0.47944134 0.46964869 0.4151052	0.39221758 0.40481703 0.39183176 0.39698781 0.48562632 0.43776053
		0.36424346 0.47162205 0.47833948 0.45537289 0.46852556 0.46429677]	0.42456971 0.38159284 0.39162568 0.39258774 0.39074407 0.38235004]
32 DAS	pif7-1	[0.48908255 0.49275123 0.5020363 0.49735387 0.49906653 0.51031998	[0.41165984 0.39996182 0.40915628 0.42042493 0.420924 0.40404239	19.5602	0	TRUE
		0.48935648 0.50582251 0.48829234 0.46256736 0.48482278 0.49118479	0.4287391 0.41239022 0.40326633 0.39779126 0.3976023 0.38124629
		0.48426816 0.47941961 0.4828752 0.49467467 0.48557163 0.4895453 ]	0.40296402 0.40372829 0.35774374 0.40127601 0.3952621 0.39114198]
32 DAS	pif7-2	[0.48041971 0.48163786 0.48203442 0.46950771 0.47579498 0.48651042	[0.40665964 0.42505033 0.3931321 0.39979094 0.42059449 0.36565455	14.6812	0	TRUE
		0.49549599 0.48254468 0.48890406 0.49076266 0.46840749 0.46535569	0.38309713 0.40132319 0.40675761 0.40348576 0.37768049 0.37904878
		0.4759405 0.45470372 0.46204642 0.46987457 0.4769022 ]	0.39009377 0.38995511 0.37093154 0.34262149 0.35468507]
32 DAS	pif3 pif7	[0.49073478 0.48977423 0.48870079 0.49518701 0.48983665 0.50183512	[0.41933023 0.4144743 0.41723858 0.40862772 0.41815352 0.41218504	15.5649	0	TRUE
		0.48806438 0.47873085 0.5114175 0.51212101 0.47960588 0.4829829	0.37216641 0.36185412 0.3991457 0.40534286 0.38440258 0.37700084
		0.46420433 0.47049405 0.46591057 0.46323477 0.48710397 0.48262543]	0.36769067 0.38094271 0.38100511 0.37946586 0.35256959 0.39964297]
35 DAS	Col-0	[0.4808219 0.46998656 0.48874809 0.49370513 0.47489079 0.47869146	[0.40883868 0.38317 0.40534649 0.41286382 0.41769805 0.42463599	11.471	0	TRUE
		0.50904118 0.52348617 0.50170382 0.49171978 0.48067882 0.49295147	0.42290285 0.44514796 0.45367254 0.41907323 0.43328391 0.4298394
		0.48311016 0.48225176 0.46601225 0.4855611 0.48976932]	0.38457921 0.38244401 0.39181227 0.37507318 0.37750322]
35 DAS	35S::PIF4	[0.48330664 0.48013968 0.47484402 0.4907935 0.48449141 0.49314378	[0.37214577 0.35648103 0.353687 0.36689547 0.42692542 0.33958531	16.4337	0	TRUE
		0.48454792 0.48766236 0.42261486 0.47210266 0.46223389 0.49094837	0.3177902 0.32703856 0.35501024 0.37939184 0.36183467 0.35746193
		0.48310147 0.4966974 0.4918023 0.49652323 0.50203732 0.54497802]	0.31611161 0.34148189 0.34521874 0.33894973 0.32862721 0.342634 ]
35 DAS	phyb	[0.50161194 0.47710862 0.47588074 0.49243725 0.49955059 0.49840452	[0.48566447 0.40859759 0.37205186 0.37778929 0.42124613 0.38556232	9.40249	0	TRUE
		0.48886593 0.48730491 0.47923621 0.47002703 0.51473588 0.48193137	0.41319485 0.43893213 0.38820842 0.43299109 0.36435 0.38389446
		0.4965245 0.46847088 0.49981865 0.59298509 0.48225677 0.49902132]	0.41266839 0.382791 0.35985484 0.34004598 0.3454879 0.3622501 ]
35 DAS	pif4	[0.49811407 0.49056368 0.48354854 0.48549888 0.4841711 0.52953848	[0.39562993 0.40898148 0.41851947 0.4195673 0.42454453 0.41853787	15.1286	0	TRUE
		0.50888166 0.52137728 0.50002909 0.4909509 0.51627874 0.47513019	0.41880291 0.41160308 0.44837943 0.40532671 0.38270907 0.39448943
		0.49274145 0.50134511 0.50695872 0.47311759 0.49358706 0.48357195]	0.38161624 0.40954843 0.39729175 0.35770753 0.38217513 0.38735988]
35 DAS	pifq	[0.48884408 0.4688114 0.49919727 0.47764997 0.50127245 0.50534537	[0.40894232 0.40290101 0.41197338 0.40276261 0.40515807 0.40328113	16.4011	0	TRUE
		0.48808144 0.49334175 0.51318925 0.51313939 0.5213212 0.52345894	0.41869711 0.42471887 0.41696424 0.41823123 0.39393266 0.40951864
		0.49106521 0.44826769 0.49131344 0.49017876 0.49509668]	0.41297804 0.37806029 0.37961399 0.38915283 0.39901051 0.38108623]
35 DAS	pif3	[0.46060835 0.46752052 0.55175177 0.53534763 0.47353467 0.46665377	[0.41709409 0.4030972 0.43150786 0.40425319 0.42300755 0.41215559	6.75993	9.03386e-08	TRUE
		0.48108464 0.48579616 0.47382878 0.40572866 0.47253915 0.43799296	0.39497519 0.48192545 0.46015824 0.43159734 0.41774095 0.4326815
		0.48533079 0.49674322 0.49577742 0.49325028 0.4834671 0.50921833]	0.4122673 0.40423418 0.40191074 0.37693297 0.39013743 0.40940035]
35 DAS	pif7-1	[0.50330245 0.49668622 0.49087321 0.51260198 0.48611846 0.47023195	[0.42980514 0.43959758 0.43386522 0.4233856 0.43226684 0.43459668	13.3389	0	TRUE
		0.50190405 0.54293722 0.5294923 0.4889354 0.50186232 0.49631455	0.4275276 0.42876148 0.41310452 0.47009514 0.43702731 0.417594
		0.50785044 0.49133532 0.4974415 0.50654638 0.48983561 0.5057579 ]	0.42069043 0.41392351 0.40369283 0.39754035 0.42733419 0.38710543]
35 DAS	pif7-2	[0.47059469 0.47617456 0.49437183 0.4744151 0.48052734 0.48536791	[0.39690704 0.42224381 0.42054742 0.39503005 0.39310192 0.47496356	8.03026	3.61719e-09	TRUE
		0.4534122 0.40586099 0.53563296 0.52640683 0.50669566 0.48498889	0.39702062 0.41352756 0.42469735 0.43151071 0.42990779 0.39724934
		0.46158429 0.479336 0.48198498 0.48056189 0.4992634 ]	0.40680434 0.41791642 0.39915358 0.39123687 0.41014452]
35 DAS	pif3 pif7	[0.50764882 0.49490224 0.49289303 0.49831933 0.48549057 0.48083173	[0.41430835 0.44381736 0.43457302 0.40518583 0.42299143 0.43784093	11.3381	0	TRUE
		0.46607397 0.44292232 0.50454383 0.5069071 0.49488832 0.5120254	0.4596799 0.45494387 0.44354376 0.42771838 0.42638371 0.40616306
		0.49966729 0.48284681 0.48775178 0.49412511 0.50080427 0.49514371]	0.40230439 0.39113174 0.40327842 0.40009229 0.4178012 0.41603882]

## Sheet: QY-Lss4 stats
Age	Plant Info	hAT_QY_Lss4	nAT_QY_Lss4	Statistic	p-value	Significant
10 DAS	Col-0	[0.35782142 0.28780997 0.33319392 0.36993854 0.34672894 0.34105463	[0.20733232 0.19597212 0.21418924 0.20834362 0.20837276 0.19716006	17.746	0	TRUE
		0.29188882 0.34566778 0.34217373 0.31949197 0.31006561 0.32648917	0.16630409 0.20235272 0.19932111 0.17073614 0.22226438 0.21063268
		0.37263278 0.33257343 0.35490087 0.36293727 0.3161268 ]	0.20251968 0.23071898 0.2176558 0.18741913 0.16215377]
10 DAS	35S::PIF4	[0.26130544 0.28139804 0.26439769 0.26229104 0.27403236 0.1604063	[0.18892239 0.12926142 0.16942981 0.1528213 0.13611959 0.17463133	5.57854	4.08857e-06	TRUE
		0.1762788 0.31077678 0.11518617 0.267577 0.19429444 0.21293706	0.18204583 0.06786932 0.11689544 0.14955357 0.15928565 0.17661931
		0.29440476 0.22870606 0.26237866 0.24251306 0.18403762]	0.12181073 0.16255612 0.12283243 0.17534342]
10 DAS	phyb	[0.3002891 0.28834914 0.27213421 0.30000194 0.22073269 0.17919762	[0.17988085 0.19088809 0.2026685 0.17144447 0.15496638 0.21663424	9.5378	0	TRUE
		0.30228254 0.28833136 0.27575283 0.29186206 0.28383866 0.25499963	0.18212128 0.14927909 0.16154768 0.14788886 0.1597541 0.17559918
		0.2740662 0.28470659 0.28589808 0.28470263 0.30116677 0.28807509]	0.2112011 0.18995916 0.08844344]
10 DAS	pif4	[0.34321324 0.35400971 0.34614163 0.32220322 0.32574553 0.30419113	[0.18582817 0.19150485 0.22043366 0.13644047 0.2026073 0.17365604	15.8901	0	TRUE
		0.36915075 0.32788111 0.29924719 0.3498938 0.2952847 0.31524929	0.18688647 0.17868557 0.14803236 0.1666457 0.18038235 0.230208
		0.37296103 0.33028199 0.34958811 0.30188161 0.38490767 0.34568657]	0.18103096 0.19067977 0.15564001 0.24352089]
10 DAS	pifq	[0.36884631 0.33915482 0.37707647 0.23874519 0.28161865 0.2731357	[0.24473359 0.22425027 0.20039798 0.25894447 0.21666217 0.15506563	6.81532	1.46503e-07	TRUE
		0.39189041 0.31241673 0.36861365 0.39791461 0.22415234 0.35148944	0.1619598 0.18381574 0.14664303 0.19940303 0.22073801 0.196757
		0.35317398 0.29277762 0.27459504 0.28264767]	0.26400934 0.25860058 0.16548386 0.21050952]
10 DAS	pif3	[0.33142208 0.3665587 0.33869825 0.36755125 0.35375285 0.23522565	[0.24969268 0.17951325 0.23360407 0.22953415 0.18725683 0.20025012	9.16111	3.37962e-10	TRUE
		0.34722407 0.36239115 0.36705672 0.25199472 0.29424029 0.3044219	0.20655518 0.18557381 0.20993916 0.20694 0.19821544 0.20376351
		0.33391795 0.23743537 0.29591058]	0.14598547 0.20884076 0.19279823 0.16923283 0.17684848]
10 DAS	pif7-1	[0.34963479 0.35429467 0.35900164 0.35498766 0.35211711 0.29794948	[0.22093791 0.25120472 0.23350048 0.27837542 0.18823189 0.14439243	9.79562	0	TRUE
		0.34287137 0.34264734 0.36849622 0.26944084 0.22353799 0.36450342	0.20838817 0.21344023 0.2159732 0.21890597 0.18333588 0.18750098
		0.36369558 0.32039803 0.33328313 0.26254665 0.36357645 0.32497197]	0.21737904 0.16641032 0.19034748 0.22805487 0.18952732]
10 DAS	pif7-2	[0.36548756 0.35502401 0.32008233 0.36271549 0.31460161 0.341749	[0.16215561 0.22510861 0.21583414 0.17972376 0.17964101 0.1351623	7.16516	4.69768e-08	TRUE
		0.21232927 0.26157157 0.24688606 0.35302112 0.27471539 0.29580693	0.22002151 0.18530082 0.15099501 0.19401605 0.19854479 0.16239531
		0.30773744 0.32131843 0.17093793 0.33941371 0.34214654]	0.25997759 0.20226218 0.2192077 0.14904877]
10 DAS	pif3 pif7	[0.30229763 0.32659059 0.33356009 0.32042169 0.32891696 0.32378769	[0.28000767 0.22041859 0.24479475 0.22905669 0.21909134 0.21603205	11.2232	0	TRUE
		0.31318999 0.33514452 0.30951606 0.25220563 0.32268891 0.30838308	0.20099949 0.17566547 0.17312999 0.17404793 0.14083026 0.18199283
		0.33021071 0.34108634 0.35175164 0.36464417 0.35519945 0.33419565]	0.18872075 0.25077182 0.22011537 0.22025475 0.12768691 0.14965049]
12 DAS	Col-0	[0.30533154 0.31833247 0.30636006 0.30380873 0.32138613 0.29436622	[0.21377047 0.20581471 0.21577219 0.2369785 0.18315366 0.20278455	14.8561	0	TRUE
		0.3256988 0.28657277 0.32655582 0.28773008 0.30854633 0.29957088	0.21028897 0.20933513 0.23842863 0.21131394 0.21785447 0.1731444
		0.29089903 0.33182817 0.29373222 0.28218787 0.26693547]	0.20443515 0.20050707 0.16808643 0.1908927 0.16344464]
12 DAS	35S::PIF4	[0.28834735 0.21581375 0.22845244 0.23796434 0.2713787 0.27363675	[0.14757452 0.18647317 0.16825719 0.21784432 0.10796273 0.17594218	6.22206	5.7159e-07	TRUE
		0.2084108 0.21574696 0.13744151 0.2368968 0.25632854 0.17720779	0.15979078 0.17251978 0.16903314 0.1708963 0.13969961 0.183757
		0.23543881 0.24399197 0.25835527 0.21186451]	0.14821521 0.15983883 0.14186166 0.19620527 0.15773967 0.14333664]
12 DAS	phyb	[0.26758103 0.31541603 0.29561572 0.27389498 0.26297333 0.28185902	[0.15371355 0.16304206 0.15827706 0.16127039 0.19318065 0.12542979	12.6199	0	TRUE
		0.25772555 0.26499576 0.27875547 0.27070638 0.24644987 0.251687	0.14883865 0.20440505 0.17951396 0.21183442 0.18947727 0.19423118
		0.27959094 0.26876534 0.28356882 0.23909848 0.20591681 0.29474448]	0.15683123 0.17388356 0.1573504 0.17594348 0.15831233 0.18397593]
12 DAS	pif4	[0.33858317 0.3535825 0.3024143 0.31941175 0.33160203 0.3055841	[0.23527137 0.1949776 0.22324194 0.19553766 0.26392766 0.22861853	16.3462	0	TRUE
		0.31355214 0.33098137 0.32914589 0.35012963 0.31549805 0.33001543	0.17885167 0.2336787 0.17501693 0.18946461 0.21272665 0.2028058
		0.33110543 0.35265957 0.34187918 0.30537061 0.30887693 0.29723104]	0.21330022 0.21847334 0.20037476 0.16015238 0.18971185 0.18696546]
12 DAS	pifq	[0.34968431 0.34156344 0.32278931 0.30851714 0.31340355 0.31118132	[0.1966027 0.21248158 0.21655095 0.14186583 0.19347672 0.18335566	15.3187	0	TRUE
		0.37453775 0.3258611 0.31738481 0.36410195 0.30776257 0.33724264	0.19280633 0.22314327 0.24348176 0.21795492 0.21257592 0.22978941
		0.30850304 0.33851219 0.32896086 0.29574802 0.27138204 0.31456716]	0.20732545 0.20093299 0.18415188 0.17281487 0.19027802 0.21204314]
12 DAS	pif3	[0.34097074 0.28541165 0.30012803 0.29745097 0.33269236 0.3203777	[0.15586364 0.21371647 0.17866984 0.19400071 0.22213437 0.25620103	9.10234	1.225e-10	TRUE
		0.30050101 0.27911681 0.31782253 0.2731333 0.32621521 0.31823039	0.21636438 0.23363736 0.22888965 0.19393643 0.23319532 0.23350094
		0.28322121 0.2828428 0.30601515 0.31629374 0.21209946 0.25081205]	0.2182576 0.22249593 0.19221815 0.19521567 0.22810469 0.19210315]
12 DAS	pif7-1	[0.35241108 0.36065907 0.37277159 0.34990468 0.30292916 0.31814362	[0.25464294 0.18868893 0.22838208 0.22051427 0.21029307 0.19885759	10.5666	0	TRUE
		0.38555481 0.34925009 0.30689286 0.36932855 0.20701962 0.34550259	0.20495277 0.23665353 0.22054574 0.21209408 0.21797551 0.25302239
		0.33881646 0.28519307 0.34380662 0.31309882 0.30852077 0.33981194]	0.22873458 0.19561587 0.16166571 0.16837306 0.19464971 0.18886874]
12 DAS	pif7-2	[0.31280174 0.34928978 0.29734076 0.3406853 0.32181046 0.3251689	[0.2156472 0.1719425 0.22277794 0.23392387 0.22599012 0.22237936	11.6682	0	TRUE
		0.32287897 0.28546241 0.28583352 0.36666937 0.32251416 0.3036743	0.23665582 0.2091082 0.22556393 0.1935046 0.2348695 0.17374183
		0.36402258 0.27563234 0.33220257 0.27415567 0.28172585]	0.19572426 0.18041443 0.20840145 0.15438097 0.18209546]
12 DAS	pif3 pif7	[0.33770657 0.28458364 0.36009532 0.32314632 0.2822171 0.30743981	[0.17860107 0.20729466 0.19354388 0.20689152 0.22340428 0.16697258	10.8074	0	TRUE
		0.28317361 0.34422121 0.22227681 0.30618358 0.30494301 0.28468467	0.20464515 0.18985813 0.20930713 0.20134935 0.21733394 0.21596311
		0.33384118 0.25837047 0.29906645 0.28105684 0.26953926 0.27962098]	0.20442829 0.21241684 0.23022115 0.19990394 0.20993332 0.19587067]
14 DAS	Col-0	[0.27469031 0.29772276 0.30679504 0.29964349 0.27728925 0.27971146	[0.24789518 0.26344389 0.28490946 0.25454167 0.22135846 0.28446735	5.00663	1.94924e-05	TRUE
		0.29564127 0.32965458 0.2987935 0.33509959 0.30136284 0.31422978	0.2677575 0.23106176 0.29083585 0.27636738 0.27695629 0.26391876
		0.30646788 0.29575192 0.29018466 0.27229174 0.28078624]	0.26288772 0.30033905 0.22209516 0.22716074 0.21422555]
14 DAS	35S::PIF4	[0.23560682 0.24537334 0.23363316 0.20147497 0.26255293 0.20540405	[0.18892185 0.28722636 0.23281978 0.2068727 0.19064902 0.20905113	3.68853	0.000832802	TRUE
		0.24606511 0.24675209 0.21542349 0.26334128 0.22825291 0.23004977	0.22397605 0.21855879 0.19014444 0.20299097 0.21835061 0.16470636
		0.21707036 0.25510693 0.22885781 0.21400052 0.25128321]	0.18689723 0.1950155 0.17686847 0.14225695 0.18381125]
14 DAS	phyb	[0.28027296 0.27254532 0.26351757 0.24506072 0.24732143 0.21664561	[0.19754094 0.23252474 0.20035555 0.21167591 0.2335504 0.16378177	7.81458	4.27772e-09	TRUE
		0.27486893 0.25048911 0.22156263 0.27138753 0.28908196 0.27220777	0.1795868 0.18332879 0.19342291 0.22788554 0.21310795 0.20613213
		0.24987541 0.25516854 0.24539784 0.23013779 0.28747184 0.26001201]	0.16113381 0.16426806 0.17430233 0.22970665 0.15682308 0.19871223]
14 DAS	pif4	[0.26898546 0.31439495 0.2584311 0.31621975 0.31989135 0.31559289	[0.27374364 0.23827279 0.27051213 0.2255891 0.15577381 0.28725267	5.19143	9.69531e-06	TRUE
		0.3114504 0.30643309 0.34005849 0.33105212 0.29956104 0.33263992	0.28294007 0.31648004 0.26887376 0.28350046 0.24121938 0.29535292
		0.34899995 0.32560094 0.31092285 0.33919813 0.30324602 0.29943321]	0.24548518 0.31197473 0.24863394 0.2482074 0.25023738 0.23597097]
14 DAS	pif7-1	[0.29361722 0.35443737 0.29713732 0.33192057 0.30850272 0.32796084	[0.30354333 0.25638814 0.27044072 0.28860239 0.26665019 0.24956957	5.53154	3.84075e-06	TRUE
		0.33941734 0.35010604 0.33652419 0.34959623 0.25160867 0.35085779	0.33485322 0.28023171 0.28466537 0.30345371 0.28668649 0.27510459
		0.34584879 0.32355546 0.34730897 0.34783501 0.31759965 0.2974121 ]	0.27853785 0.24375546 0.27001891 0.2917338 0.23831444]
14 DAS	pif7-2	[0.3488171 0.30943261 0.33604744 0.33054458 0.32201442 0.31849239	[0.24236176 0.26199445 0.21706475 0.24841974 0.27733469 0.2784522	8.79945	4.70047e-10	TRUE
		0.27372271 0.34576559 0.35330816 0.3520164 0.34948232 0.34899191	0.27784986 0.26989489 0.29912029 0.23717437 0.28043559 0.28587842
		0.34814097 0.33230446 0.31373192 0.3120205 0.30648163]	0.2210187 0.26593058 0.27277411 0.26664687 0.25796334]
14 DAS	pif3 pif7	[0.33869025 0.3235058 0.34800298 0.34161303 0.30405994 0.27957061	[0.26301278 0.31705243 0.28639123 0.29993654 0.29010066 0.25359617	4.71271	4.03736e-05	TRUE
		0.29696155 0.29978632 0.32530554 0.35810658 0.31541189 0.342504	0.24650682 0.2416789 0.25903765 0.25076844 0.2635378 0.26479065
		0.31594006 0.24366416 0.26339766 0.29991553 0.3374616 0.33066501]	0.24317547 0.27759001 0.30162553 0.2766398 0.29245408 0.28273653]
23 DAS	Col-0	[0.31164076 0.34771159 0.33255699 0.34319799 0.30746712 0.35694595	[0.30383983 0.33775637 0.31823019 0.31888628 0.32437367 0.31716651	4.17291	0.000214944	TRUE
		0.33404351 0.34140704 0.3373603 0.35297498 0.33875393 0.33576941	0.32509683 0.3007407 0.30013279 0.29485633 0.29910628 0.32024695
		0.34691426 0.32408248 0.33651417 0.28445656 0.32269337]	0.29618122 0.30231795 0.3184522 0.29173757 0.29524134]
23 DAS	phyb	[0.28823573 0.3188408 0.29529327 0.30635845 0.32413517 0.30258249	[0.27660619 0.2881746 0.27498264 0.25229117 0.27435758 0.27472604	6.78097	1.35922e-07	TRUE
		0.31237383 0.29063975 0.30509259 0.35317916 0.33646788 0.30519863	0.28065906 0.2558969 0.2452118 0.24398345 0.25590891 0.26676459
		0.2955945 0.28524269 0.28083691 0.27440873]	0.24470504 0.2563526 0.26718536 0.24279705 0.26575953]
23 DAS	pif4	[0.3259684 0.38577118 0.36628211 0.33856017 0.35261478 0.36171509	[0.33061506 0.3066293 0.3106139 0.32763834 0.33874541 0.34068983	7.27612	2.00226e-08	TRUE
		0.35463358 0.36447313 0.35996427 0.3915203 0.35822863 0.372792	0.31982688 0.32612734 0.3151492 0.32418951 0.28915689 0.31182494
		0.39569778 0.36759482 0.3484968 0.36791372 0.3161535 0.35211317]	0.29991448 0.31351119 0.31875549 0.2924814 0.32352393 0.32328415]
23 DAS	pifq	[0.36780847 0.32438644 0.35672307 0.33244864 0.36206496 0.31847625	[0.30947385 0.32032121 0.31214606 0.32446161 0.31873803 0.29305611	3.08735	0.00407453	TRUE
		0.3501444 0.34870751 0.3185114 0.33722333 0.32544417 0.37483876	0.32816465 0.3249314 0.32214685 0.30285395 0.34600473 0.31807894
		0.34686808 0.32015085 0.29712285 0.34858159 0.28341175]	0.32205499 0.31582141 0.31463427 0.3066977 0.31342246 0.2906961 ]
23 DAS	pif7-1	[0.36578533 0.38681091 0.35093388 0.3621648 0.34739667 0.37776637	[0.31924826 0.325545 0.33227637 0.31239435 0.32464239 0.33872733	10.038	0	TRUE
		0.36826545 0.38117963 0.36888021 0.37045577 0.35734368 0.37988263	0.34092577 0.3196407 0.33668185 0.31718155 0.32479877 0.33447273
		0.37964539 0.37093164 0.36571798 0.378788 0.36400979 0.32971288]	0.31128488 0.29805995 0.29376622 0.32327301 0.32146905 0.30501357]
23 DAS	pif7-2	[0.36031684 0.36740702 0.36712054 0.33335345 0.32227926 0.30532007	[0.32187474 0.32015114 0.3059662 0.33395109 0.31977855 0.32906288	5.12932	1.36426e-05	TRUE
		0.35758447 0.37435501 0.37455079 0.36538649 0.37067026 0.35808371	0.3151056 0.32525225 0.33393726 0.32177406 0.31897413 0.32182512
		0.37035416 0.36294993 0.32797162 0.33352879 0.32260212]	0.30086075 0.32290376 0.32852452 0.26307383 0.28460151]
23 DAS	pif3 pif7	[0.34102415 0.36088712 0.35701649 0.36970284 0.36372825 0.34611542	[0.31427529 0.31504592 0.3312566 0.32661378 0.33890935 0.31305494	7.9683	2.76959e-09	TRUE
		0.36815299 0.35559041 0.36509739 0.35931669 0.36903669 0.37003143	0.31982854 0.29763654 0.32296071 0.30153031 0.31506986 0.32040443
		0.35429776 0.31941587 0.33086939 0.3377913 0.35824567 0.34456013]	0.31020539 0.30426396 0.31780677 0.32208745 0.26467914 0.30667121]
30 DAS	35S::PIF4	[0.23598835 0.30777348 0.33173528 0.31238388 0.28390706 0.37202871	[0.26524891 0.26433898 0.28974073 0.35418467 0.30234704 0.29876377	3.24321	0.00265047	TRUE
		0.32745884 0.38518965 0.34961868 0.34834078 0.35916321 0.38342192	0.25985075 0.3014971 0.26951324 0.3022851 0.29049598 0.28899149
		0.31299969 0.34235603 0.31354549 0.26843633 0.290732 0.30979683]	0.26966451 0.32132496 0.29450835 0.24924317 0.26996117 0.29625635]
30 DAS	phyb	[0.34718117 0.32266182 0.3642502 0.31527164 0.34707973 0.37832214	[0.27647591 0.30998066 0.30396733 0.30784512 0.29356641 0.26835443	4.43327	9.69116e-05	TRUE
		0.37656006 0.3454373 0.39256857 0.36186699 0.3698305 0.34446026	0.32182614 0.27092288 0.29708379 0.29804289 0.34619343 0.32857146
		0.31863289 0.36958718 0.30929803 0.32499882 0.3228908 0.28143618]	0.31213737 0.30913853 0.32430273 0.33308764 0.28386318]
30 DAS	pif4	[0.35786353 0.36833043 0.34254049 0.36569202 0.39176273 0.35037031	[0.32238296 0.34442054 0.35049521 0.3500559 0.33890958 0.33947246	2.82096	0.0079362	TRUE
		0.34958655 0.36383706 0.37167482 0.34725281 0.41597534 0.39467845	0.36023297 0.3689006 0.350342 0.34967928 0.33163369 0.35272774
		0.35988428 0.31692375 0.35174707 0.35853009 0.31993496 0.35722571]	0.33288965 0.33786528 0.3589838 0.30400395 0.31866911 0.32291274]
30 DAS	pifq	[0.36647478 0.36442575 0.34728995 0.36594863 0.3704004 0.36270552	[0.3380432 0.34081954 0.3454958 0.31510765 0.32903387 0.35800632	3.37852	0.00188412	TRUE
		0.36488604 0.33060812 0.35265102 0.3790432 0.38436541 0.36226291	0.34321791 0.33007876 0.33641599 0.3416159 0.33668319 0.3404908
		0.37725511 0.35911201 0.37463679 0.34821123 0.27080784]	0.333854 0.34036945 0.34105948 0.32336479 0.32767463 0.30938976]
30 DAS	pif7-1	[0.36636246 0.36100396 0.38017032 0.36263013 0.40828471 0.4099722	[0.34619894 0.35022411 0.34470511 0.34140452 0.37166359 0.34278111	5.26452	7.79035e-06	TRUE
		0.40991185 0.37062696 0.408647 0.39955354 0.38771701 0.38797914	0.36175767 0.36016318 0.35697227 0.35674053 0.37126244 0.34972843
		0.38602928 0.38471107 0.38967796 0.37994445 0.32700408 0.37046163]	0.35584571 0.36983875 0.31149973 0.33607222 0.34783104 0.32821017]
30 DAS	pif7-2	[0.3869881 0.36959713 0.33673891 0.34158517 0.37521831 0.38908987	[0.34658821 0.34827984 0.33097937 0.35104731 0.35804116 0.33756716	2.04994	0.0486391	TRUE
		0.32607382 0.35320812 0.37867976 0.36662409 0.37171641 0.36690776	0.35456613 0.34885272 0.35585391 0.34361373 0.34166247 0.35061684
		0.38089024 0.35336689 0.36412115 0.2720772 0.34974484]	0.34104537 0.34900747 0.34327111 0.29571518 0.31029123]
30 DAS	pif3 pif7	[0.36758197 0.37425101 0.36794803 0.34851441 0.30532617 0.34657719	[0.34608534 0.35461346 0.33962223 0.32545475 0.36144908 0.34625177	3.06147	0.00428359	TRUE
		0.35043693 0.33283748 0.40253369 0.39396855 0.38030847 0.36639805	0.34671333 0.33968634 0.36785659 0.36296077 0.34216032 0.33674784
		0.37222158 0.36484449 0.36931607 0.35797879 0.3595713 0.358576 ]	0.32580911 0.33696858 0.35963928 0.33356589 0.29058926 0.33847371]
32 DAS	Col-0	[0.3392314 0.35036997 0.35384776 0.36771769 0.36430711 0.32322119	[0.33191367 0.32586072 0.34084559 0.34468919 0.35566436 0.32224474	3.14993	0.0035291	TRUE
		0.35285141 0.36734453 0.37191825 0.36961755 0.38655075 0.34443011	0.34334873 0.35330946 0.34427473 0.33454155 0.34340886 0.32960018
		0.3516768 0.32441868 0.33286203 0.3520222 0.35112632]	0.33863271 0.33454119 0.32552356 0.34670668 0.33331112]
32 DAS	35S::PIF4	[0.34337208 0.28609907 0.36542534 0.32573046 0.35462886 0.33598643	[0.26894415 0.26024659 0.25553613 0.29079225 0.30670542 0.31208182	7.11067	3.23668e-08	TRUE
		0.32956013 0.35606963 0.30099261 0.34546081 0.36994449 0.33664273	0.26517338 0.26298976 0.26924197 0.29140341 0.27749165 0.26612877
		0.30208663 0.32711373 0.30977064 0.30964873 0.30463144 0.3324404 ]	0.28043846 0.32003789 0.27502454 0.24741452 0.27060633 0.23632023]
32 DAS	phyb	[0.32188793 0.39795009 0.38210286 0.3476485 0.38281432 0.34206852	[0.28150843 0.31083026 0.31171663 0.3110527 0.26507687 0.29158797	4.54515	6.99977e-05	TRUE
		0.31653079 0.36091983 0.35191123 0.34448821 0.32523668 0.33937169	0.31601091 0.29072692 0.30741115 0.29579537 0.35397608 0.30799325
		0.31541249 0.3551937 0.33484653 0.30149332 0.3158922 0.34176275]	0.3236878 0.30014635 0.34260694 0.31032751 0.29250352]
32 DAS	pif4	[0.3533384 0.37387661 0.39745983 0.3632497 0.37185213 0.3496401	[0.33726781 0.35212631 0.35355289 0.36178264 0.34297129 0.34595689	3.21225	0.00287859	TRUE
		0.38631511 0.37177295 0.37372338 0.39625638 0.410244 0.38388728	0.35414086 0.35880548 0.34357348 0.34579677 0.33483691 0.35946735
		0.38722723 0.36629949 0.25586705 0.34856132 0.38081884 0.36640692]	0.32025712 0.32844802 0.34669354 0.30746696 0.32719433 0.3262528 ]
32 DAS	pifq	[0.36273208 0.35093749 0.33741466 0.35679351 0.37854873 0.34934499	[0.34361682 0.3352591 0.35214581 0.33072164 0.34368362 0.35864979	4.33305	0.000129547	TRUE
		0.37199375 0.35981175 0.35731818 0.37506921 0.36729265 0.39069072	0.34009348 0.32443681 0.33227543 0.32764298 0.34053551 0.3298612
		0.37313942 0.37654099 0.35789424 0.36030158 0.28847082]	0.33212419 0.33312047 0.33566255 0.31441614 0.31452213 0.31157923]
32 DAS	pif7-2	[0.36049779 0.36547145 0.37763396 0.35322058 0.36301726 0.37937776	[0.34603269 0.35893603 0.34446426 0.34068681 0.36729822 0.32653733	4.48655	8.77543e-05	TRUE
		0.38379227 0.374128 0.3866378 0.36778563 0.37358628 0.34998503	0.34423545 0.34965368 0.35694272 0.35186105 0.33026107 0.35087038
		0.32983027 0.35914863 0.3568347 0.38525674 0.35658545]	0.33531452 0.352137 0.32888458 0.29437047 0.31563834]
32 DAS	pif3 pif7	[0.35975388 0.35012721 0.36147258 0.3707771 0.37745504 0.39335065	[0.3501605 0.3502681 0.35876704 0.34875749 0.36824394 0.35448489	4.13816	0.000217546	TRUE
		0.35865074 0.35273769 0.40685162 0.38159119 0.37140746 0.37475675	0.33988518 0.32981242 0.36451275 0.36333992 0.3427159 0.33866538
		0.35894338 0.35167062 0.3756958 0.35170119 0.35769484 0.3518289 ]	0.3379837 0.33053608 0.34788717 0.34116404 0.29637501 0.34294325]
35 DAS	Col-0	[0.36921302 0.37079934 0.36573582 0.38416437 0.37452005 0.38401053	[0.35613132 0.32457304 0.35108695 0.34690877 0.35442853 0.35887349	7.9124	4.9774e-09	TRUE
		0.38534081 0.41164845 0.37804435 0.37507058 0.39655731 0.41471865	0.35995989 0.35389037 0.35933075 0.34850623 0.36548991 0.35513419
		0.40255545 0.40820915 0.3706519 0.38414807 0.38209131]	0.34350837 0.3397459 0.35158225 0.33448634 0.33284383]
35 DAS	35S::PIF4	[0.32932775 0.35545146 0.39072478 0.35159256 0.33954084 0.33714975	[0.29452689 0.27863225 0.27777067 0.26751374 0.34706973 0.24487459	9.95306	0	TRUE
		0.3743502 0.35894457 0.31098138 0.36356125 0.34769104 0.37470502	0.24534061 0.25940959 0.28595421 0.31386559 0.29348794 0.27984487
		0.35497387 0.38016458 0.32932739 0.34125452 0.35439215 0.36183669]	0.25791018 0.28589413 0.28189056 0.27394834 0.26303208 0.27940113]
35 DAS	phyb	[0.37910913 0.34902047 0.34360523 0.38716845 0.32040916 0.408466	[0.38820921 0.3401846 0.30280025 0.30598195 0.34348281 0.29593572	5.97089	9.39493e-07	TRUE
		0.3780285 0.36697014 0.3866419 0.33806315 0.42645019 0.40153573	0.31856087 0.347638 0.30910392 0.34725048 0.31140741 0.31751768
		0.4155725 0.35161492 0.38480003 0.43217038 0.34919323 0.38121512]	0.3286255 0.32298959 0.28643312 0.26519847 0.29882698 0.29695752]
35 DAS	pif4	[0.40310153 0.38406554 0.40156138 0.37592909 0.37884139 0.40055576	[0.35447463 0.35943724 0.36480657 0.37206339 0.35090215 0.36178835	8.66002	4.05545e-10	TRUE
		0.40574727 0.4268614 0.39614594 0.39843123 0.44007626 0.40168412	0.35737439 0.35625427 0.36717529 0.35704629 0.34709659 0.35720642
		0.4189288 0.40206594 0.40471433 0.39021337 0.36744339 0.38756021]	0.34869827 0.37075836 0.33461005 0.31718237 0.33850681 0.34904968]
35 DAS	pifq	[0.38270701 0.38457187 0.38740515 0.3555439 0.37271443 0.40124246	[0.35344655 0.35343187 0.34964727 0.34181971 0.34882622 0.34360708	6.04081	8.55602e-07	TRUE
		0.3612615 0.39375348 0.33898496 0.40634857 0.38182348 0.40887949	0.34885171 0.35896224 0.34347531 0.36371157 0.35154661 0.36098117
		0.38746738 0.34770248 0.38313037 0.37579294 0.39080529]	0.35653634 0.3352032 0.33937926 0.34613033 0.35583128 0.32566585]
16 DAS	Col-0	[0.26361277 0.29908816 0.31322342 0.31841575 0.27389556 0.28053571	[0.2570179 0.27011227 0.26553622 0.22071553 0.22137414 0.25124905	6.50608	2.52871e-07	TRUE
		0.29339327 0.27786526 0.29448776 0.29258082 0.29580556 0.28807037	0.265345 0.25813258 0.24643438 0.21287043 0.22078217 0.24704359
		0.29198278 0.28366732 0.3011464 0.27969567 0.29275258]	0.25208324 0.28002901 0.25168057 0.28141479 0.26628529]
16 DAS	35S::PIF4	[0.20785354 0.2549015 0.23392637 0.14163732 0.22365805 0.21360392	[0.18917507 0.20048636 0.16947083 0.22763804 0.21287278 0.17768093	2.70216	0.0109292	TRUE
		0.19784245 0.25548736 0.23851679 0.21314746 0.19815313 0.21985175	0.20345817 0.18220927 0.18805382 0.15151073 0.14917067 0.16585678
		0.21757458 0.10721439 0.23825599 0.21940302]	0.15608143 0.15536559 0.17666433 0.20260193 0.19917172 0.17828222]
16 DAS	phyb	[0.23244884 0.2423169 0.26642984 0.2715223 0.26864695 0.23285389	[0.1867714 0.19639359 0.1991139 0.20785048 0.21957573 0.21987204	8.57433	6.56774e-10	TRUE
		0.28741055 0.2510231 0.29094056 0.2667191 0.26118046 0.28467939	0.17854234 0.16758115 0.20034023 0.17311946 0.17063324 0.23217105
		0.23799944 0.23717898 0.21577017 0.26108027 0.29695607 0.29145872]	0.20686951 0.2161148 0.20803799 0.19702062 0.19204067]
16 DAS	pif4	[0.29407513 0.32596663 0.32377342 0.29868624 0.32618605 0.31239833	[0.23113672 0.27659965 0.2445155 0.25613562 0.26477101 0.26100762	9.53667	0	TRUE
		0.30501725 0.33980926 0.33922586 0.33776882 0.31169325 0.33550985	0.28735025 0.28013677 0.28578039 0.23521595 0.28428349 0.2524221
		0.35634256 0.3240758 0.32881511 0.33108909 0.28345497 0.31259341]	0.27890097 0.25333212 0.27502211 0.2637904 0.27852698 0.25446949]
16 DAS	pifq	[0.34276308 0.24264777 0.3023747 0.28153268 0.30411325 0.28013084	[0.2722292 0.25967798 0.26292834 0.2648787 0.25019192 0.24046821	4.8337	3.00863e-05	TRUE
		0.2977743 0.30728338 0.28858496 0.30324692 0.31865462 0.3457955	0.26001555 0.26897335 0.24719908 0.26751134 0.25969363 0.25332006
		0.30147151 0.32825243 0.24666804 0.29542907 0.25455816]	0.26020774 0.23507872 0.27092969 0.26114116 0.27978459 0.26993388]
16 DAS	pif3	[0.26780256 0.27920591 0.28523436 0.28527641 0.2856376 0.27440603	[0.25663461 0.26415102 0.25342916 0.24658886 0.24619931 0.24473977	2.37584	0.0232867	TRUE
		0.30745169 0.29600462 0.302885 0.29303218 0.2930765 0.28339502	0.24763895 0.28028093 0.24823599 0.26642493 0.27864441 0.27585258
		0.16015501 0.26400697 0.27311699 0.24224847 0.26859181 0.25492018]	0.20937982 0.25411704 0.24915365 0.249433 0.24606487 0.22643726]
16 DAS	pif7-1	[0.32030244 0.35452475 0.31932258 0.30826587 0.33152053 0.33337876	[0.26835833 0.25756392 0.23650011 0.26829249 0.20133966 0.27691276	8.52722	5.83778e-10	TRUE
		0.33114598 0.35372736 0.33944629 0.34382387 0.28743106 0.33914518	0.2837333 0.23902036 0.29379825 0.27790173 0.24000133 0.26072271
		0.33318513 0.32556676 0.33038745 0.34289781 0.30928009 0.27904707]	0.28647622 0.27931706 0.28679421 0.27184327 0.2787676 0.24457021]
16 DAS	pif7-2	[0.32087198 0.32547904 0.31403937 0.29722707 0.28819844 0.27094647	[0.28824928 0.27407752 0.25494244 0.2243557 0.26734661 0.28309994	8.07464	3.20896e-09	TRUE
		0.32434017 0.3427216 0.33827331 0.33670093 0.32599096 0.30966096	0.24403052 0.25870356 0.20984188 0.23205847 0.25263094 0.244143
		0.32238732 0.33417028 0.27966059 0.29733915 0.27191826]	0.24398143 0.24804704 0.23867515 0.22897623 0.26194765]
16 DAS	pif3 pif7	[0.31067671 0.31487773 0.34121232 0.31990353 0.30259727 0.28965589	[0.2530408 0.2593794 0.24144241 0.21978536 0.27754633 0.2909997	7.43302	1.27298e-08	TRUE
		0.31880159 0.30458796 0.33012617 0.31389624 0.33774895 0.3321072	0.27177626 0.26592002 0.25944607 0.28930442 0.26923776 0.25841081
		0.32253537 0.29199095 0.27689566 0.29886408 0.31141372 0.31424236]	0.30059913 0.27560533 0.26703428 0.28429618 0.23507066 0.27569506]
23 DAS	35S::PIF4	[0.25630023 0.27194131 0.27010478 0.25736622 0.25541077 0.2593815	[0.26288249 0.28357441 0.25820184 0.28315333 0.27850646 0.29171204	0.640219	0.526321	FALSE
		0.24228649 0.28092324 0.2744354 0.28154088 0.27905565 0.2569225	0.2773671 0.26846843 0.25622061 0.26190241 0.24066496 0.26358121
		0.27396984 0.26905078 0.30967188 0.22315747 0.21095323 0.27176204]	0.22166714 0.24748067 0.24131109 0.23645169 0.25273639 0.23829122]
23 DAS	pif3	[0.30691602 0.31976489 0.3151785 0.31534872 0.32785151 0.31036158	[0.32209999 0.33314188 0.33852858 0.3233428 0.30422946 0.3376202	-1.08484	0.285627	FALSE
		0.34572621 0.34288259 0.34091422 0.32722238 0.31679352 0.30568357	0.31640343 0.31515238 0.30877024 0.30464948 0.33509498 0.28543223
		0.18988541 0.29041592 0.26667975 0.27116748 0.28350459 0.28455077]	0.2926418 0.30576297 0.32470562 0.31393007 0.2883766 0.29662799]
35 DAS	pif3	[0.35339334 0.27124204 0.37838326 0.3578324 0.3752109 0.33838109	[0.35194871 0.35368071 0.35355657 0.32709671 0.34079565 0.33968699	1.38668	0.174564	FALSE
		0.33050647 0.36742944 0.37671059 0.28631425 0.34279382 0.32816525	0.32074597 0.3477188 0.33538943 0.35429185 0.3513408 0.36220802
		0.37061995 0.3692761 0.3910291 0.37573625 0.37043779 0.36675553]	0.32677467 0.34036813 0.35152703 0.32027632 0.33496541 0.33505751]
35 DAS	pif7-1	[0.38447531 0.38521274 0.39995132 0.3537375 0.30340744 0.28438904	[0.37554967 0.37701357 0.37060973 0.35155112 0.37081831 0.37357981	0.983462	0.332327	FALSE
		0.33457025 0.4171548 0.42717575 0.39270566 0.40553866 0.38350313	0.36131998 0.36365419 0.35581452 0.38695459 0.38912225 0.3774654
		0.40816265 0.38760336 0.37219922 0.40265071 0.38938776 0.42809974]	0.37759196 0.38017745 0.35717656 0.37184355 0.39080248 0.35718757]
35 DAS	pif7-2	[0.37162917 0.37698956 0.38619525 0.37483377 0.38145657 0.37510056	[0.34597973 0.36689426 0.36193807 0.33742181 0.33172132 0.38517231	0.623621	0.537297	FALSE
		0.27336061 0.23426899 0.42458736 0.42364317 0.39997324 0.37679138	0.33651631 0.3732217 0.37361153 0.38000608 0.3830248 0.35364708
		0.3711617 0.38007436 0.3825575 0.3635465 0.39493231]	0.36698518 0.38180598 0.36322519 0.35726444 0.36329282]
35 DAS	pif3 pif7	[0.40129511 0.39473078 0.39124749 0.41964845 0.38850045 0.37699944	[0.34742332 0.3833855 0.37286819 0.33326966 0.35211931 0.37780103	1.3365	0.190261	FALSE
		0.2691009 0.24652562 0.3815406 0.41173643 0.3966214 0.41393006	0.37557671 0.38570515 0.37860015 0.37545151 0.37752354 0.36399104
		0.39788765 0.38565585 0.40694635 0.38549071 0.36940977 0.38451706]	0.35885118 0.33579124 0.34739384 0.34372878 0.36782333 0.36639898]
32 DAS	pif3	[0.32968486 0.34469196 0.32194727 0.36018385 0.35744749 0.35525178	[0.34335511 0.3441286 0.34001598 0.34199231 0.34889197 0.34141248	-1.46069	0.153281	FALSE
		0.32457729 0.36166906 0.33578422 0.31070786 0.29665392 0.2714828	0.33392442 0.32635059 0.30899009 0.31452424 0.36083264 0.34099697
		0.23423654 0.32583771 0.33071859 0.30259523 0.31788618 0.30939939]	0.32738507 0.32219373 0.32594057 0.33692086 0.33847914 0.31214446]
32 DAS	pif7-1	[0.35022969 0.38563669 0.37467595 0.06433681 0.39581133 0.40455944	[0.35202413 0.34909211 0.35986131 0.35866913 0.37003404 0.35038782	0.71702	0.478259	FALSE
		0.38674087 0.40234459 0.38695883 0.39337834 0.39891295 0.38488855	0.35401543 0.35763619 0.35949061 0.35943438 0.3636492 0.34722876
		0.39321074 0.36423629 0.37682759 0.39006223 0.3678097 0.38125665]	0.37057407 0.3678979 0.3143009 0.34291891 0.35100703 0.33667064]
30 DAS	Col-0	[0.35486342 0.34193698 0.36599977 0.32774094 0.28520895 0.35194569	[0.33739654 0.32204515 0.33949121 0.32628425 0.34833192 0.32099398	0.365702	0.716994	FALSE
		0.30908654 0.3469633 0.36731306 0.37519476 0.36279267 0.33778399	0.33564711 0.3619857 0.34213517 0.3441278 0.34401896 0.33161837
		0.33876386 0.32131321 0.34906592 0.36116584 0.28095433]	0.3377677 0.32969102 0.32254221 0.3538282 0.33537161]
30 DAS	pif3	[0.30532516 0.3358416 0.32090678 0.3382037 0.35598079 0.37077093	[0.34426825 0.34644296 0.33456245 0.33666334 0.33764095 0.33189145	-0.646644	0.522204	FALSE
		0.37569516 0.33867668 0.35816261 0.35533146 0.26901486 0.30972902	0.31736912 0.32242015 0.31403115 0.31889106 0.36553564 0.3485627
		0.32684314 0.33623511 0.3065192 0.35499377 0.28184193 0.27195789]	0.33427675 0.33286307 0.32973313 0.3485914 0.33564181 0.30930302]
14 DAS	pifq	[0.3234706 0.25220931 0.28081686 0.28080376 0.28175607 0.28793747	[0.27627923 0.30398962 0.31112533 0.23836721 0.25170423 0.24457349	1.96928	0.057631	FALSE
		0.3304476 0.29962008 0.32893609 0.30393317 0.33712418 0.3369382	0.2540747 0.31409001 0.28521245 0.25713825 0.29076098 0.32092702
		0.29480733 0.29117124 0.30418388 0.23668323]	0.31031414 0.27346654 0.2768296 0.29198822 0.25871476 0.27578285]
14 DAS	pif3	[0.24842102 0.24602239 0.30828434 0.30644316 0.28682925 0.31056959	[0.24622622 0.24359031 0.22582818 0.25007063 0.2782824 0.29161213	1.87914	0.0688199	FALSE
		0.31471326 0.30404732 0.30179076 0.30252445 0.29530132 0.26645694	0.25650317 0.32306415 0.26973501 0.26926146 0.30711822 0.26505365
		0.19703151 0.27393368 0.25436054 0.27498298 0.27255716 0.2708411 ]	0.26813944 0.24923184 0.24816667 0.2614538 0.24324268 0.21971662]

## Sheet: qP-LSS1 stats
Age	Plant Info	hAT_qP_Lss1	nAT_qP_Lss1	Statistic	p-value	Significant
10 DAS	Col-0	[0.56529506 0.57668008 0.66884905 0.63210141 0.6028509 0.6114235	[0.4839794 0.47443533 0.40710609 0.3978583 0.46573089 0.38242081	16.7983	0	TRUE
		0.57587903 0.60599917 0.64837359 0.66620712 0.59073086 0.59606318	0.36554294 0.3857944 0.37620609 0.37410282 0.36978509 0.37639771
		0.61281741 0.58194085 0.67185284 0.60179651 0.65024029]	0.37183794 0.40012652 0.36981869 0.33555397 0.39609412]
10 DAS	35S::PIF4	[0.63228083 0.56283921 0.7379494 0.68144161 0.64456758 0.64004062	[0.54047461 0.44567475 0.43119055 0.55397872 0.5644973 0.55961179	6.88179	1.02702e-07	TRUE
		0.56300405 0.64919919 0.61268875 0.42480054 0.76270273 0.65508036	0.48814102 0.38382252 0.45659609 0.46783346 0.41282092 0.51943459
		0.76068899 0.66694225 0.6838338 0.64537929 0.68404584]	0.48319819 0.47088479 0.43628353 0.49289271]
10 DAS	phyb	[0.70843698 0.68572166 0.67528155 0.71144331 0.66756008 0.67964927	[0.34112591 0.494034 0.54729123 0.46977264 0.55249333 0.52210822	12.0958	0	TRUE
		0.66450248 0.65807042 0.76462736 0.68507473 0.67005531 0.69636588	0.49226637 0.54896754 0.41806329 0.49503234 0.49903287 0.40183426
		0.65939686 0.67760054 0.66143485 0.67449455 0.6748139 0.69230835]	0.40002873 0.49626866 0.34452306]
10 DAS	pif4	[0.63567538 0.68064222 0.5907159 0.61958107 0.58442572 0.59637108	[0.43482494 0.35214272 0.41069919 0.32756012 0.38041415 0.37093986	20.7034	0	TRUE
		0.63358957 0.66287343 0.60638091 0.68766453 0.58482142 0.63096006	0.34662918 0.2890217 0.35421739 0.36475153 0.40845088 0.38663096
		0.5978846 0.56532582 0.63462052 0.60503055 0.65775871 0.62840904]	0.39030987 0.33374083 0.30950428 0.36778141]
10 DAS	pifq	[0.60776332 0.66363263 0.6566788 0.48493635 0.60706206 0.47626148	[0.52468165 0.57507435 0.52932325 0.4288014 0.37331723 0.51630324	5.99712	1.40555e-06	TRUE
		0.66494712 0.63308106 0.60824668 0.67341304 0.50651838 0.66504014	0.25603822 0.26872136 0.16436478 0.35837475 0.31838754 0.42810738
		0.66129976 0.67060814 0.45777827 0.58510693]	0.45684776 0.42282522 0.30696184 0.40701906]
10 DAS	pif3	[0.62705622 0.69267581 0.57703934 0.72066902 0.66680504 0.59875628	[0.62389141 0.50533841 0.5760263 0.55033695 0.44933543 0.39908878	6.91425	1.11923e-07	TRUE
		0.72162156 0.67882582 0.67421943 0.54862915 0.63382029 0.59834505	0.3622145 0.36664927 0.46978803 0.36586838 0.35856468 0.39591545
		0.66765221 0.44117305 0.62470546]	0.41012337 0.29035431 0.38263783 0.44110512 0.39570175]
10 DAS	pif7-1	[0.66529654 0.61742806 0.65033331 0.60056042 0.59860182 0.55697686	[0.50513119 0.61441548 0.68763318 0.6313147 0.55382563 0.40211658	5.29033	7.83254e-06	TRUE
		0.69569228 0.63995585 0.59670332 0.51674036 0.59911094 0.6246731	0.38361964 0.34747474 0.16878024 0.42486298 0.44291652 0.53982162
		0.61672531 0.62905531 0.62428546 0.57824917 0.61711873 0.62700316]	0.31936772 0.38126261 0.41372144 0.36088512 0.36326873]
10 DAS	pif7-2	[0.61980373 0.62777318 0.58511831 0.6280175 0.57612796 0.6003008	[0.36926543 0.55025379 0.48983522 0.45537557 0.38313884 0.25599984	6.28398	5.48345e-07	TRUE
		0.3853313 0.48343585 0.48669875 0.56906929 0.55464443 0.60383613	0.29488164 0.42005168 0.3591772 0.38240024 0.44269626 0.39451107
		0.55457403 0.59737502 0.38491028 0.60722915 0.64055456]	0.39436363 0.31905581 0.41185351 0.37154386]
10 DAS	pif3 pif7	[0.61463562 0.61155903 0.61815795 0.61151484 0.61915332 0.62041765	[0.56413978 0.54555827 0.46930306 0.58292741 0.4675099 0.57022911	8.45712	7.08181e-10	TRUE
		0.6041739 0.66984067 0.5917387 0.63799846 0.61238914 0.63415333	0.44698688 0.41781115 0.42216437 0.35555717 0.26543009 0.37089511
		0.60617161 0.6285076 0.55702915 0.62772061 0.65207252 0.61219462]	0.37320506 0.39721929 0.39458144 0.40753393 0.30371826 0.45163031]
12 DAS	Col-0	[0.63110539 0.63174342 0.63846427 0.62049551 0.64432926 0.64027863	[0.41302151 0.40042371 0.4254242 0.47242753 0.36395114 0.36437857	19.336	0	TRUE
		0.64365223 0.62933668 0.64938836 0.64393769 0.65925741 0.65385201	0.47249297 0.41908776 0.46384771 0.48406852 0.48358921 0.41219479
		0.6736603 0.66942338 0.66524104 0.63050492 0.61483936]	0.42020387 0.39325619 0.32727458 0.40581594 0.40141244]
12 DAS	35S::PIF4	[0.66330905 0.65887418 0.66661712 0.6494721 0.67122579 0.63891127	[0.35932413 0.44437297 0.50043012 0.3434487 0.29746287 0.42014188	9.99509	0	TRUE
		0.6449688 0.59054133 0.4872094 0.58488654 0.71799674 0.64013184	0.43251998 0.4124559 0.4796705 0.48566983 0.49449959 0.51487849
		0.70322884 0.59331685 0.63949086 0.58889 ]	0.51025271 0.43448474 0.36076518 0.45669705 0.40091953 0.40706469]
12 DAS	phyb	[0.65616175 0.70940314 0.66213599 0.67134654 0.64761048 0.66263422	[0.34194109 0.4311527 0.4125878 0.47121703 0.41778161 0.32814781	13.6434	0	TRUE
		0.624988 0.66795298 0.68347695 0.66573978 0.63160551 0.66401636	0.454233 0.49469379 0.50472786 0.4976591 0.49382582 0.51468815
		0.64232787 0.65276112 0.66558441 0.64210405 0.64247916 0.65834052]	0.5534566 0.47786844 0.42828684 0.3792348 0.39561195 0.49622203]
12 DAS	pif4	[0.65793652 0.64499702 0.58450707 0.64174834 0.65149811 0.62994433	[0.35476627 0.40925235 0.38971991 0.36672198 0.42260763 0.46912447	15.2671	0	TRUE
		0.62179049 0.67783631 0.68051042 0.66379847 0.65746713 0.65423215	0.5641822 0.51267693 0.45285079 0.46721755 0.41481217 0.38193653
		0.65486501 0.65593378 0.66477989 0.65257249 0.61824205 0.61243263]	0.35812842 0.43656091 0.38497239 0.34982119 0.40424771 0.3558601 ]
12 DAS	pifq	[0.65643338 0.66211813 0.62622575 0.58619568 0.61547897 0.47574216	[0.45205614 0.33946984 0.3892261 0.23077799 0.33687664 0.40707451	8.99033	1.65488e-10	TRUE
		0.67474876 0.66791527 0.70032831 0.70764466 0.60057934 0.68022969	0.45146306 0.5211556 0.57580077 0.55372016 0.47523625 0.43106555
		0.67267893 0.70240856 0.67697761 0.61801986 0.56711352 0.59734542]	0.46233503 0.45414477 0.37334534 0.35609305 0.35875831 0.38947921]
12 DAS	pif3	[0.68139577 0.66035229 0.60606668 0.64882773 0.65694043 0.65445929	[0.34070975 0.44316846 0.35486713 0.44753602 0.44471009 0.58152599	8.49978	6.29588e-10	TRUE
		0.61159574 0.64108275 0.70050794 0.67715786 0.70683399 0.70849327	0.52673103 0.50910345 0.56961522 0.58629323 0.57151727 0.39796919
		0.68071008 0.64210583 0.66214267 0.67056121 0.53789147 0.57737181]	0.51463191 0.47714514 0.39961428 0.47793949 0.40557829 0.37173119]
12 DAS	pif7-1	[0.65698928 0.66374846 0.6661151 0.65085442 0.58325911 0.67647017	[0.46919249 0.37221079 0.42499754 0.44713275 0.45069619 0.40045249	11.8015	0	TRUE
		0.69289111 0.68766137 0.63651512 0.67064233 0.48512603 0.6922771	0.49963392 0.53437326 0.48664056 0.5185836 0.44821166 0.42300511
		0.64943699 0.59599612 0.66357555 0.65081231 0.6567075 0.65157146]	0.50291283 0.36391044 0.35594178 0.37351603 0.37028367 0.39752204]
12 DAS	pif7-2	[0.64827703 0.65233344 0.58018777 0.69587343 0.65156086 0.67781041	[0.35336636 0.39692694 0.40532759 0.43749033 0.52065327 0.4389271	12.526	0	TRUE
		0.6021115 0.67545554 0.62281037 0.66803566 0.63376825 0.66277392	0.46226766 0.55535003 0.47695146 0.49051566 0.40120586 0.37755441
		0.64646074 0.64824599 0.63480094 0.58111112 0.62143501]	0.40718257 0.34224086 0.40499015 0.31753385 0.35017451]
12 DAS	pif3 pif7	[0.67131946 0.6549438 0.64681552 0.65483319 0.60649854 0.61327993	[0.37770991 0.45572735 0.40975882 0.41999532 0.45204914 0.31689197	16.5963	0	TRUE
		0.61847454 0.64365942 0.58782951 0.62848923 0.70074056 0.68554855	0.39302892 0.43523801 0.36963513 0.39335418 0.41930328 0.42625701
		0.67276171 0.58420616 0.68488431 0.61404689 0.63409758 0.64831551]	0.40822686 0.46487688 0.50368124 0.4914262 0.41568075 0.36292904]
14 DAS	Col-0	[0.60413959 0.64124918 0.62191328 0.64507621 0.60576678 0.61435929	[0.47849793 0.49414387 0.52493331 0.46519997 0.42702622 0.59305481	10.0207	0	TRUE
		0.62330443 0.68724494 0.67773867 0.67224319 0.69007204 0.66024921	0.54771049 0.50874979 0.55201239 0.52432636 0.54900887 0.52773034
		0.61975559 0.62981259 0.6325644 0.62527215 0.61406585]	0.50864371 0.52200715 0.43925431 0.44857404 0.42101494]
14 DAS	35S::PIF4	[0.6315004 0.68373448 0.65471843 0.6167406 0.64469284 0.64266363	[0.42558649 0.46386571 0.4970309 0.41424158 0.43690178 0.47416293	16.2896	0	TRUE
		0.61704918 0.62473938 0.6361095 0.65008959 0.62067985 0.6762002	0.47604469 0.457518 0.42963554 0.40246203 0.44287232 0.41170444
		0.66005751 0.6656769 0.49844433 0.61274491 0.63851212]	0.43437973 0.44195201 0.45170978 0.40638375 0.40858106]
14 DAS	phyb	[0.60840601 0.63635745 0.64014761 0.65396199 0.64337056 0.47811928	[0.43676015 0.47341893 0.4531903 0.48766857 0.51448538 0.36698167	11.1946	0	TRUE
		0.63767473 0.60368001 0.62017292 0.63660251 0.64817531 0.62836273	0.44961806 0.44674563 0.52522508 0.51195714 0.53623551 0.49953409
		0.6397979 0.64359256 0.60582148 0.62256461 0.64552403 0.63648163]	0.49934534 0.42514008 0.43891486 0.44740019 0.3893781 0.46059336]
14 DAS	pif4	[0.63730313 0.6524701 0.59769387 0.62178453 0.65718036 0.62675506	[0.48447451 0.4752865 0.42498982 0.43774595 0.4828477 0.58820346	10.4571	0	TRUE
		0.61248684 0.60488925 0.62598907 0.63681741 0.65107271 0.70614265	0.56570032 0.58447019 0.49249946 0.54933294 0.47176486 0.53200008
		0.70024929 0.65402919 0.64767571 0.66647294 0.6240077 0.64599826]	0.47231986 0.54153528 0.46548517 0.45188462 0.44133243 0.43216902]
14 DAS	pifq	[0.66170651 0.58169719 0.60330711 0.62436142 0.63727513 0.59998502	[0.43568822 0.48987206 0.51649376 0.40019522 0.44588333 0.42748103	7.41075	1.97262e-08	TRUE
		0.65173007 0.65153524 0.60494586 0.60520199 0.68633334 0.69714319	0.41491304 0.58907292 0.5780543 0.51082909 0.48599306 0.58278094
		0.67930875 0.57774102 0.64253502 0.49230126]	0.53456328 0.49750019 0.46655128 0.47604415 0.43151511 0.42994864]
14 DAS	pif3	[0.57321276 0.60355784 0.61944364 0.70258509 0.70249106 0.71307956	[0.46236749 0.47474329 0.4414956 0.4739903 0.45789067 0.57955056	6.92865	5.50619e-08	TRUE
		0.70246705 0.69212212 0.68065921 0.64830572 0.67445607 0.64069918	0.56595007 0.60015169 0.54867672 0.60711428 0.59990936 0.47507774
		0.57702632 0.63198223 0.57796551 0.60653877 0.62099862 0.57425812]	0.55643911 0.52291447 0.46245765 0.49653897 0.46978419 0.41015804]
14 DAS	pif7-1	[0.65969301 0.65985912 0.62898611 0.62422628 0.65447107 0.7106025	[0.51339162 0.48566911 0.49774784 0.50323935 0.48947207 0.4894972	10.5133	0	TRUE
		0.6383411 0.69371319 0.65981936 0.68099531 0.5996169 0.65638714	0.58382656 0.58308832 0.58060407 0.57412571 0.5509828 0.48491929
		0.67807102 0.61872152 0.6658048 0.67449871 0.65459597 0.6331321 ]	0.52238379 0.44178212 0.50504024 0.42704694 0.42837853]
14 DAS	pif7-2	[0.6290253 0.58784639 0.61328815 0.61848688 0.60088944 0.56072761	[0.45738985 0.44097919 0.42105982 0.46000928 0.54825027 0.4720081	12.0119	0	TRUE
		0.5405684 0.67606591 0.65176649 0.65067706 0.65466637 0.64587581	0.53518777 0.50706538 0.53475762 0.44145204 0.48995618 0.47154942
		0.65121026 0.64772787 0.6196657 0.6513717 0.6315941 ]	0.46693177 0.43750572 0.48139347 0.46080235 0.44968373]
14 DAS	pif3 pif7	[0.65733834 0.66921376 0.67948675 0.67216825 0.62246942 0.59009313	[0.45886993 0.57754745 0.49671063 0.50083587 0.51705799 0.46562781	11.6553	0	TRUE
		0.62983963 0.62388413 0.6596479 0.6885395 0.66767511 0.67516972	0.45967992 0.46166372 0.42593115 0.43644426 0.45928404 0.41022501
		0.66312389 0.59269515 0.6143601 0.67088907 0.65389367 0.64679336]	0.44457855 0.54766692 0.58897025 0.5357398 0.50701651 0.45156712]
16 DAS	Col-0	[0.59743631 0.62380073 0.61832686 0.62875522 0.59931961 0.61604716	[0.47746219 0.47878523 0.48060984 0.45725778 0.40499952 0.45969071	14.1606	0	TRUE
		0.6331101 0.63198478 0.62336784 0.67489421 0.65463973 0.65628941	0.4458688 0.55730045 0.52855622 0.46030974 0.48475831 0.51257351
		0.6395179 0.62660257 0.63796686 0.60866399 0.623712 ]	0.53636862 0.49401957 0.47747377 0.51483643 0.47958261]
16 DAS	35S::PIF4	[0.60223896 0.58264208 0.64278503 0.54743588 0.60466319 0.54195914	[0.41415386 0.43343474 0.42777448 0.36407682 0.45792505 0.4180476	13.5287	0	TRUE
		0.6259136 0.64947359 0.64488762 0.66432928 0.56153046 0.62708812	0.46368698 0.50015682 0.493806 0.42567617 0.38205207 0.36440851
		0.6138337 0.63494607 0.59776811 0.60287773]	0.39784518 0.34256581 0.45463515 0.41566625 0.44403706 0.40017549]
16 DAS	phyb	[0.56449851 0.61586725 0.62620915 0.63376963 0.61654954 0.62314972	[0.43548057 0.45225505 0.46364572 0.46018305 0.55517798 0.55512696	12.7608	0	TRUE
		0.60019922 0.60393546 0.67152138 0.63178696 0.65568147 0.6434176	0.47327885 0.38190354 0.45200006 0.37437305 0.42456156 0.50829522
		0.6114689 0.62224523 0.60757371 0.60522559 0.62615448 0.64565618]	0.47911803 0.4378562 0.4596576 0.46069632 0.45112217]
16 DAS	pif4	[0.61667347 0.63409408 0.65237531 0.61345691 0.61425448 0.61806087	[0.46968646 0.50168086 0.43160878 0.45581062 0.47038456 0.51373814	15.7206	0	TRUE
		0.57464889 0.67748893 0.68450479 0.67496899 0.65925176 0.66789407	0.51933444 0.49486569 0.53228947 0.4847185 0.5315773 0.4703399
		0.68100997 0.62597049 0.6383771 0.66255669 0.63638847 0.65071719]	0.50274557 0.51428462 0.50575859 0.49009666 0.51457149 0.45873464]
16 DAS	pifq	[0.66800806 0.5969844 0.61506013 0.61282645 0.64106159 0.6201373	[0.45334871 0.46982848 0.48163058 0.45356238 0.39524803 0.41544083	11.6707	0	TRUE
		0.63424914 0.63939699 0.57298637 0.69131909 0.66362132 0.68029391	0.45454382 0.53891749 0.51267548 0.54613808 0.47513327 0.47125517
		0.66739963 0.63907681 0.58870985 0.66131412 0.54167151]	0.49899064 0.47606125 0.50613894 0.50284361 0.47346789 0.445201 ]
16 DAS	pif3	[0.60427983 0.59253136 0.68725871 0.68564097 0.69161107 0.66775707	[0.50240915 0.46710806 0.46596549 0.45701757 0.46772939 0.48279743	12.1191	0	TRUE
		0.69259184 0.69394292 0.68139867 0.65176871 0.67858807 0.64462543	0.4660733 0.51117528 0.44752314 0.51458579 0.5385783 0.58410048
		0.63460862 0.63485411 0.61369356 0.60093124 0.61158565 0.55140659]	0.45020806 0.509924 0.50658425 0.46607177 0.47931584 0.47712847]
16 DAS	pif7-1	[0.65085586 0.64307909 0.59000816 0.61303694 0.67185839 0.67674045	[0.46624646 0.48759185 0.43714995 0.51952126 0.33125203 0.46353891	11.0893	0	TRUE
		0.64567924 0.65925402 0.6424163 0.64281744 0.61294591 0.65851685	0.52387791 0.56167839 0.53832775 0.54207482 0.50680724 0.53957367
		0.66747237 0.63323265 0.66419674 0.66157197 0.64539469 0.61735142]	0.50678833 0.48213335 0.50716146 0.48232275 0.50626271 0.42257386]
16 DAS	pif7-2	[0.62156294 0.59684006 0.58451838 0.5884423 0.56390955 0.53832277	[0.5086803 0.46561375 0.47360973 0.494501 0.46551733 0.57913409	10.0445	0	TRUE
		0.68038324 0.6660447 0.64431073 0.64611195 0.64449138 0.64421626	0.52407878 0.53715199 0.46674925 0.46491398 0.50447425 0.51175092
		0.65776212 0.65001839 0.60598191 0.64333093 0.62895359]	0.47156416 0.51832529 0.41161554 0.43848418 0.48366228]
16 DAS	pif3 pif7	[0.64044885 0.66516116 0.66421291 0.65833731 0.63215364 0.61368601	[0.46063936 0.46529001 0.44546999 0.42656488 0.54274767 0.57282603	16.3827	0	TRUE
		0.64142908 0.6665968 0.68311288 0.66634513 0.67380117 0.66779487	0.5017505 0.5111218 0.50049761 0.49604717 0.47302616 0.45767422
		0.65668916 0.61742535 0.64777141 0.66088543 0.65668655 0.64393373]	0.49757671 0.49234355 0.53782697 0.50116081 0.50618264 0.52264318]
23 DAS	Col-0	[0.62514207 0.651198 0.65040105 0.64093195 0.63533075 0.63616163	[0.53615563 0.58976809 0.57775758 0.58258921 0.59784436 0.57201782	11.2167	0	TRUE
		0.64251156 0.63412069 0.64423354 0.67529012 0.66784844 0.65487028	0.57989938 0.59542579 0.56869683 0.57861542 0.54612619 0.57442764
		0.64932703 0.64604764 0.6374333 0.62477915 0.64193082]	0.55614037 0.53796777 0.54189502 0.52175049 0.50270624]
23 DAS	35S::PIF4	[0.63674665 0.64261178 0.64899168 0.6358941 0.64254311 0.62069517	[0.54387967 0.55657531 0.52825186 0.54400952 0.51791405 0.54020887	9.8073	0	TRUE
		0.6180096 0.59415259 0.65793248 0.56805891 0.63078254 0.63148619	0.54809894 0.51466494 0.52044422 0.57215651 0.53303322 0.51003732
		0.65013587 0.65965047 0.67705915 0.63730712 0.52274153 0.64632634]	0.45412162 0.4941239 0.48535124 0.50559882 0.53564476 0.49016438]
23 DAS	phyb	[0.63198226 0.57452282 0.60754224 0.62927734 0.63991477 0.62088323	[0.57284231 0.58011794 0.55055391 0.52426865 0.58203999 0.57950596	7.6295	1.3288e-08	TRUE
		0.58137169 0.61625587 0.65982308 0.6900093 0.62946124 0.61082529	0.5629379 0.57632032 0.5199802 0.49863665 0.51835871 0.51870815
		0.60738044 0.59356963 0.63186539 0.62794831]	0.48241944 0.55659602 0.51484857 0.48082896 0.52163182]
23 DAS	pif4	[0.64510971 0.65312992 0.63469851 0.63859285 0.64073087 0.64297524	[0.60721129 0.58158617 0.57088365 0.57690391 0.60052172 0.57895282	10.0642	0	TRUE
		0.62537245 0.68079178 0.67948269 0.67935048 0.63735209 0.66322841	0.58496853 0.57459966 0.56081162 0.61433323 0.52705376 0.54072429
		0.6789633 0.65299687 0.64042562 0.66437564 0.64277251 0.65518238]	0.51867902 0.57051084 0.54635865 0.47729559 0.555357 0.5377364 ]
23 DAS	pifq	[0.66866278 0.64433662 0.64511202 0.6449738 0.66404498 0.62286724	[0.51772802 0.54171626 0.53302748 0.58981688 0.54464692 0.50824109	9.79889	0	TRUE
		0.6586481 0.65520539 0.62576041 0.68529239 0.67287564 0.66605456	0.60709758 0.60112456 0.57882454 0.58656107 0.60707725 0.55983498
		0.65637625 0.64993484 0.6400743 0.67433985 0.59134795]	0.52663258 0.53926658 0.55353888 0.52732355 0.51988734 0.49578117]
23 DAS	pif3	[0.63221959 0.64317418 0.69714741 0.69320969 0.70188191 0.64755508	[0.58340488 0.57963709 0.60297877 0.58931673 0.55242825 0.60640773	8.66159	4.03817e-10	TRUE
		0.68966089 0.69629909 0.68913341 0.64884372 0.6744708 0.64960909	0.56456514 0.6505797 0.60004203 0.54755856 0.59248105 0.52714592
		0.71206754 0.6478762 0.6058697 0.62708499 0.64657144 0.64675256]	0.55425538 0.55503621 0.56964426 0.54845132 0.50492211 0.54278955]
23 DAS	pif7-1	[0.66539716 0.65238265 0.62621284 0.63960278 0.67346121 0.67443154	[0.56108458 0.58648095 0.58281532 0.55922575 0.56580864 0.62046741	9.45046	0	TRUE
		0.63740886 0.65665055 0.64336049 0.65223404 0.65709649 0.66160979	0.61420906 0.57797747 0.62149036 0.55275936 0.59008798 0.5545205
		0.65820726 0.64689423 0.65668889 0.66075684 0.65360869 0.63655195]	0.58339331 0.50004982 0.49843975 0.57674766 0.59166427 0.56644465]
23 DAS	pif7-2	[0.64164813 0.61572435 0.6275071 0.62892852 0.58392168 0.58605716	[0.55142049 0.54531952 0.54574784 0.55857234 0.54179166 0.57363996	8.05964	3.34143e-09	TRUE
		0.67056803 0.67284553 0.63538414 0.64038813 0.64516607 0.63069653	0.5604057 0.5879829 0.59526959 0.57512188 0.55441316 0.57095169
		0.65327046 0.65227409 0.63568742 0.64029704 0.63774101]	0.5298566 0.58407653 0.56713276 0.45993413 0.48202119]
23 DAS	pif3 pif7	[0.66108736 0.66418847 0.66754453 0.66285052 0.65134101 0.64163782	[0.59876556 0.56580342 0.57802585 0.55882965 0.60358384 0.57812715	13.7299	0	TRUE
		0.64973607 0.66258733 0.67104278 0.65176457 0.67137917 0.66537793	0.55793633 0.5192751 0.56655801 0.52406912 0.52884871 0.5590789
		0.65838054 0.62143561 0.64850732 0.65794149 0.66162171 0.65764376]	0.56460925 0.53166717 0.55366387 0.56708288 0.48597217 0.5641482 ]
30 DAS	Col-0	[0.65986568 0.67094255 0.66402998 0.65066665 0.64195977 0.65301298	[0.59559241 0.56109941 0.60254108 0.58309048 0.61664981 0.56917642	9.92966	0	TRUE
		0.64585364 0.65736429 0.71028042 0.69938772 0.69335764 0.67529776	0.63203391 0.61272726 0.57386773 0.55197997 0.55974424 0.54357938
		0.65244092 0.65695449 0.67312796 0.66525061 0.61781443]	0.56485897 0.54801463 0.51838631 0.57119648 0.54415558]
30 DAS	35S::PIF4	[0.69210219 0.68206828 0.67069916 0.67362691 0.65039308 0.701715	[0.50868812 0.52690169 0.56382489 0.61039701 0.57913796 0.55991322	14.0608	0	TRUE
		0.68844413 0.69679017 0.68982948 0.65430742 0.71247979 0.6742976	0.5286664 0.56828113 0.53086677 0.58288622 0.56638138 0.5556767
		0.68323642 0.66568478 0.66821393 0.63617799 0.67841299 0.66523398]	0.56177412 0.58688122 0.54052235 0.48067485 0.49564116 0.54564057]
30 DAS	phyb	[0.65205465 0.63282952 0.79067748 0.63313947 0.65950595 0.67678357	[0.50573236 0.54205289 0.54596843 0.54497531 0.53152908 0.478816	8.7419	4.1923e-10	TRUE
		0.71947812 0.70096834 0.70333265 0.69673622 0.66523143 0.67588191	0.54846728 0.51694421 0.52239824 0.53220878 0.65335328 0.59906107
		0.62437353 0.666018 0.62394393 0.65339388 0.63239811 0.63522237]	0.58189113 0.56771969 0.55953832 0.55584814 0.49436223]
30 DAS	pif4	[0.68245148 0.67607907 0.65665732 0.66162415 0.68071205 0.65893046	[0.55977472 0.62234372 0.59667665 0.59301507 0.59639266 0.59873665	9.78405	0	TRUE
		0.65711138 0.67175341 0.66291196 0.64565667 0.71227729 0.66803772	0.63457136 0.62113449 0.63793202 0.57798088 0.58303971 0.58128646
		0.70177399 0.68475777 0.66041138 0.66742233 0.65754802 0.66145531]	0.56876591 0.55056172 0.58394789 0.51283545 0.53353299 0.56607102]
30 DAS	pifq	[0.6762978 0.67666292 0.6634184 0.67729153 0.6802417 0.66197229	[0.59072929 0.59162877 0.60198195 0.57249334 0.59381541 0.64030068	10.048	0	TRUE
		0.67547123 0.6564309 0.6692319 0.72295776 0.70595957 0.68985896	0.59858434 0.58893719 0.61461452 0.56243324 0.59317528 0.60073683
		0.67478789 0.65664213 0.66542208 0.64982261 0.60310496]	0.56359292 0.58637117 0.58658688 0.55383061 0.53442514 0.54315235]
30 DAS	pif3	[0.6845539 0.68108291 0.65148972 0.65725975 0.76230512 0.75885379	[0.61012082 0.61794125 0.60668431 0.59073032 0.6040185 0.60160885	7.59337	8.03416e-09	TRUE
		0.75858834 0.67634427 0.67442043 0.70580572 0.70768193 0.70809924	0.57344891 0.58874949 0.5605072 0.57132533 0.68854285 0.65415687
		0.68066837 0.68535174 0.67059056 0.68864205 0.65043085 0.62714013]	0.63491913 0.57854408 0.58221899 0.58937997 0.57958512 0.54586907]
30 DAS	pif7-1	[0.69312838 0.69273975 0.67758347 0.67551988 0.7177169 0.69048532	[0.58627706 0.58936312 0.57376599 0.60665815 0.60682197 0.58983995	15.8118	0	TRUE
		0.69765169 0.70835469 0.70063954 0.6968039 0.69891718 0.70437349	0.62093712 0.60927161 0.58922641 0.6082435 0.58919694 0.57572242
		0.69935133 0.68109673 0.68623781 0.66795406 0.64449932 0.66990294]	0.5884499 0.59556526 0.52515548 0.58533245 0.58358227 0.58830298]
30 DAS	pif7-2	[0.66269182 0.66442341 0.6769229 0.66494506 0.7213816 0.67620096	[0.6005176 0.62027527 0.56820109 0.60486748 0.64091904 0.57418828	10.4053	0	TRUE
		0.69493535 0.70345056 0.65670172 0.6657817 0.66409362 0.67111446	0.57735416 0.5874781 0.61288747 0.59718656 0.57394739 0.56337502
		0.6691434 0.65045861 0.65432426 0.67367077 0.6629029 ]	0.59203274 0.57799176 0.57014981 0.51054036 0.54145346]
30 DAS	pif3 pif7	[0.6715708 0.67164339 0.67955284 0.667866 0.67211586 0.67492816	[0.60053225 0.61378451 0.60185939 0.62233029 0.60962872 0.61345576	13.1835	0	TRUE
		0.67260016 0.64719197 0.70412434 0.71818267 0.70834867 0.69402099	0.56094159 0.55365473 0.58230399 0.59330017 0.57181549 0.56399268
		0.6758634 0.67589713 0.69684297 0.7001262 0.67118329 0.6793388 ]	0.55024739 0.56992294 0.55795157 0.55803774 0.5200806 0.595634 ]
32 DAS	Col-0	[0.64686567 0.66807303 0.66936651 0.65778246 0.66262213 0.62359064	[0.5769143 0.55109943 0.58554605 0.58189805 0.60717831 0.55318724	10.2136	0	TRUE
		0.62137704 0.6971245 0.70368631 0.69873484 0.69345148 0.67778741	0.61758364 0.60321854 0.57555761 0.55619018 0.55455016 0.53998141
		0.65668909 0.6384124 0.62825121 0.63272467 0.64892251]	0.55574346 0.54632171 0.51630847 0.55989779 0.54289579]
32 DAS	phyb	[0.63349836 0.6858226 0.66943403 0.65439508 0.69242192 0.64693782	[0.49394595 0.56313175 0.5479657 0.55454001 0.51490459 0.52154762	9.91861	0	TRUE
		0.67347222 0.69024377 0.66600355 0.66636092 0.63488997 0.65063748	0.56323381 0.5370015 0.53716377 0.55361063 0.64600402 0.570645
		0.65402656 0.64912475 0.61821215 0.62711261 0.64148719 0.63470987]	0.60897322 0.56053365 0.58133128 0.53946219 0.4999826 ]
32 DAS	pif4	[0.65388677 0.66024391 0.6724803 0.66192334 0.66335217 0.64342342	[0.5487902 0.58023493 0.59666824 0.59475146 0.59088565 0.58832386	5.38098	5.49644e-06	TRUE
		0.66342748 0.66222221 0.63838859 0.65831335 0.70888673 0.68535769	0.63817065 0.61832238 0.62445534 0.57649232 0.57052568 0.58108063
		0.67475136 0.67397813 0.98315817 0.65994334 0.6627002 0.65139078]	0.55578237 0.54183064 0.57219345 0.504118 0.53665508 0.54597836]
32 DAS	pifq	[0.67458047 0.65167512 0.6377811 0.65095271 0.66701758 0.64847326	[0.58514584 0.58175976 0.58865423 0.56642187 0.5837077 0.64256489	10.4632	0	TRUE
		0.66300549 0.65042708 0.64263525 0.70900539 0.68824228 0.7011517	0.59003063 0.57073051 0.58517562 0.55833898 0.57782276 0.58080128
		0.6791069 0.67686031 0.64436137 0.64794987 0.62591681]	0.55487148 0.56441109 0.56969079 0.53404662 0.51596195 0.52519662]
32 DAS	pif3	[0.64185104 0.68596753 0.64234357 0.67252276 0.71705151 0.71108251	[0.60080097 0.60056316 0.60650631 0.59071138 0.60523549 0.59694253	7.56387	8.74223e-09	TRUE
		0.68099501 0.71941277 0.63918201 0.68717946 0.67181217 0.61632642	0.57014956 0.58612602 0.56120307 0.56541681 0.69185056 0.64165243
		0.68170939 0.66761617 0.66886994 0.65426282 0.66359758 0.66055824]	0.62305932 0.56951785 0.57856325 0.58065037 0.57362483 0.54985334]
32 DAS	pif7-1	[0.66637398 0.66119206 0.66305946 0.63304278 0.66152736 0.70097728	[0.59925164 0.57534779 0.58519363 0.60751605 0.61298203 0.58228741	11.9701	0	TRUE
		0.68196197 0.69829748 0.67624353 0.65700437 0.67208966 0.67474595	0.62799236 0.61573326 0.60596542 0.59337674 0.58589157 0.56975367
		0.66927422 0.66498033 0.6665842 0.67500138 0.66063786 0.66110619]	0.59108379 0.58981407 0.51609809 0.58658072 0.57420574 0.57484838]
32 DAS	pif7-2	[0.64488435 0.6480928 0.65196484 0.63566026 0.64408966 0.6484124	[0.59390271 0.61600873 0.57175489 0.59925856 0.62544846 0.55401424	8.33861	1.58198e-09	TRUE
		0.65609158 0.64284892 0.67905987 0.67939836 0.65516532 0.65991152	0.57692664 0.5996301 0.60941569 0.60398932 0.5669012 0.56840514
		0.66791526 0.63418015 0.64006514 0.63333106 0.6471918 ]	0.5850931 0.57841346 0.55575224 0.4947175 0.5230021 ]
32 DAS	pif3 pif7	[0.67279819 0.67366333 0.66905956 0.6822479 0.66918527 0.67605943	[0.60854352 0.60900931 0.60736741 0.59808998 0.60547769 0.61789121	12.0159	0	TRUE
		0.6740614 0.65956605 0.70718416 0.71497023 0.68168111 0.67659792	0.55902636 0.54731026 0.58896012 0.59701 0.57299999 0.55441179
		0.651666 0.658944 0.65673526 0.64717599 0.67335031 0.66435608]	0.54388474 0.5668953 0.55427331 0.55856416 0.51225585 0.58410455]
32 DAS	35S::PIF4	[ 0.69468337 0.63918939 0.67447626 0.67861545 0.67082993 0.66533687	[0.5145607 0.49734322 0.53175347 0.51988635 0.58324608 0.57153246	1.07958	0.287927	FALSE
		0.67513947 0.6896518 0.69592726 0.66548047 0.72412877 0.66355316	0.53213591 0.53351191 0.52621382 0.57614069 0.55813733 0.5242548
		0.658291 0.66414634 0.67789412 0.6387349 -0.51671761 0.65672546]	0.56912549 0.60181634 0.53784665 0.46980068 0.51196266 0.45786139]
35 DAS	Col-0	[0.64727132 0.66268414 0.65463288 0.65761537 0.63818366 0.64349162	[0.59398297 0.55213451 0.57882525 0.59269389 0.59959005 0.60633048	6.87706	8.79976e-08	TRUE
		0.6977581 0.71003431 0.69131374 0.68358631 0.66868306 0.66654297	0.60192479 0.6479992 0.64981448 0.61339995 0.62829558 0.65782438
		0.65893445 0.65957431 0.64118059 0.65299267 0.6523845 ]	0.5653012 0.568403 0.57012105 0.54951242 0.54461933]
35 DAS	35S::PIF4	[0.65783757 0.6442522 0.64670769 0.66510591 0.64640992 0.65042772	[0.54847906 0.53764748 0.53486879 0.5464572 0.61812962 0.49745005	13.9968	0	TRUE
		0.66478084 0.69613692 0.61645553 0.6799122 0.66241237 0.67488209	0.50360118 0.51343194 0.55327273 0.59043038 0.55661088 0.55242411
		0.67250556 0.67325953 0.6604952 0.67670782 0.70205963 0.71553064]	0.5007038 0.52241918 0.53703237 0.52434116 0.49458516 0.52037211]
35 DAS	phyb	[0.67541279 0.64135599 0.64223871 0.65444479 0.66908533 0.6740968	[0.66594644 0.58165907 0.53651078 0.54172162 0.59993475 0.55285588	6.55428	1.65686e-07	TRUE
		0.64319712 0.64786577 0.67878657 0.65491688 0.69063092 0.68200376	0.60298314 0.64107765 0.5721153 0.62971702 0.53754542 0.56754404
		0.66854135 0.63891701 0.65287985 0.81975169 0.64412322 0.66462514]	0.60557456 0.57559335 0.53783865 0.47435113 0.48747476 0.52834259]
35 DAS	pif4	[0.65405322 0.65854564 0.64031865 0.64098626 0.64382922 0.71362141	[0.57270553 0.5862751 0.6046393 0.60207714 0.60608905 0.60430492	9.01243	1.55932e-10	TRUE
		0.69133935 0.70850924 0.68347377 0.67751285 0.68996119 0.64573369	0.60183559 0.58458815 0.6546757 0.59601978 0.56294376 0.57806246
		0.67264747 0.66591468 0.66812036 0.62626769 0.662441 0.6471583 ]	0.56257447 0.59806304 0.57928066 0.51150374 0.55524154 0.56572536]
35 DAS	pifq	[0.64538903 0.57146011 0.65772708 0.63501626 0.65880426 0.66180204	[0.58699528 0.57844246 0.58953588 0.57918088 0.58381219 0.57965688	8.20203	1.8034e-09	TRUE
		0.64858071 0.65405547 0.67257782 0.69905543 0.70231957 0.70052311	0.61097706 0.61966263 0.60129777 0.6034539 0.57371529 0.59908639
		0.65882138 0.62667526 0.64710188 0.65161655 0.65696862]	0.60000895 0.54544033 0.55785523 0.56189095 0.58045916 0.54372028]
35 DAS	pif3	[0.6340938 0.64214398 0.73891683 0.7294144 0.66761348 0.66118951	[0.59301861 0.58583295 0.62220224 0.5776921 0.60203745 0.59381046	6.56282	1.61555e-07	TRUE
		0.67660478 0.68150198 0.66064922 0.69061719 0.65716075 0.62574039	0.5682497 0.6811731 0.66002487 0.62728383 0.60713347 0.62763098
		0.65866407 0.67435871 0.66542823 0.6714218 0.66925388 0.71683145]	0.60766072 0.58984344 0.58280069 0.53682828 0.56726444 0.62234335]
35 DAS	pif7-1	[0.6557571 0.64593823 0.64275802 0.67191361 0.65062641 0.63315655	[0.61315673 0.62822531 0.61996866 0.60210691 0.61970895 0.61820285	6.55844	1.63662e-07	TRUE
		0.66280934 0.7232692 0.7110242 0.66166362 0.66846622 0.66333511	0.61001707 0.60214775 0.58431198 0.67480906 0.63906492 0.61080896
		0.6713594 0.6450235 0.65847627 0.66114243 0.63864989 0.6577918 ]	0.60637113 0.60408284 0.58941417 0.5802693 0.61526795 0.55340608]
35 DAS	pif7-2	[0.62678817 0.62956933 0.64872644 0.63463074 0.63940252 0.63918629	[0.57231363 0.6078755 0.60921149 0.57053225 0.56431775 0.67876401	4.26323	0.00016627	TRUE
		0.62036959 0.57188203 0.71630197 0.7078386 0.69176049 0.66168525	0.59150872 0.60863819 0.6207592 0.63755712 0.63082426 0.58285002
		0.63053954 0.65095726 0.64032426 0.64402703 0.65558666]	0.59216787 0.6031317 0.59266747 0.56990195 0.58960151]
35 DAS	pif3 pif7	[0.67190862 0.66318848 0.65688501 0.65547582 0.64902957 0.64835447	[0.59024121 0.62894957 0.62073916 0.58637521 0.60551793 0.62227178	6.92606	5.54802e-08	TRUE
		0.64299372 0.61408854 0.70528963 0.69606039 0.68434244 0.69646111	0.66383876 0.65874063 0.6461472 0.62280457 0.62869951 0.58899241
		0.68612089 0.6696011 0.66495667 0.6740215 0.67942483 0.67468522]	0.58832776 0.56852712 0.57888575 0.57866128 0.6004391 0.60182631]

## Sheet: qP-LSS4 stats
Age	Plant Info	hAT_qP_Lss4	nAT_qP_Lss4	Statistic	p-value	Significant
10 DAS	Col-0	[0.53237138 0.42595987 0.53831662 0.58440272 0.56051565 0.53094215	[0.34680741 0.35684239 0.35549565 0.35264951 0.36337862 0.35139905	15.3903	0	TRUE
		0.47449333 0.54291051 0.55108341 0.52223518 0.51487388 0.52633013	0.26838385 0.34619668 0.33980733 0.2957102 0.39424997 0.36515061
		0.58726118 0.5409011 0.54992229 0.56664781 0.52444003]	0.34184997 0.38952468 0.36561977 0.32624731 0.29045111]
10 DAS	35S::PIF4	[0.53579429 0.491709 0.49302106 0.47502165 0.47123947 0.30080076	[0.36477395 0.23986928 0.33312742 0.26111851 0.25187744 0.34371957	6.04494	1.07986e-06	TRUE
		0.32175637 0.49570376 0.23688213 0.46135103 0.38062991 0.43251288	0.33509423 0.11698885 0.22023681 0.29523851 0.28477288 0.32108858
		0.51903554 0.40397555 0.46064802 0.48182898 0.40657114]	0.23563878 0.2516406 0.2240869 0.350675 ]
10 DAS	phyb	[0.49777074 0.50233754 0.44751999 0.48245338 0.36949899 0.28085232	[0.32947677 0.34951755 0.35731408 0.31177054 0.28875628 0.36834151	7.91837	6.13476e-09	TRUE
		0.51396683 0.51150497 0.49479032 0.55569057 0.49998397 0.43683588	0.3249664 0.23098452 0.29589904 0.24464297 0.28256177 0.3056909
		0.4805518 0.48378575 0.472064 0.46958752 0.53139739 0.51356096]	0.36989874 0.33144438 0.13492859]
10 DAS	pif4	[0.54182157 0.56128555 0.53455203 0.50315842 0.53331695 0.49062526	[0.30597128 0.316626 0.37531811 0.26354574 0.34546759 0.29291365	15.8998	0	TRUE
		0.57070772 0.51923115 0.48349837 0.56466707 0.47037695 0.5254835	0.30307681 0.30840693 0.2542126 0.2889468 0.30150983 0.37144961
		0.59490265 0.52784 0.55307435 0.48681445 0.59042105 0.5482557 ]	0.30925881 0.31478746 0.24596598 0.41029386]
10 DAS	pifq	[0.53681209 0.50220023 0.54308731 0.43632509 0.44275812 0.43733399	[0.4149147 0.38314488 0.31673936 0.45943109 0.40746162 0.32332121	6.77414	1.63929e-07	TRUE
		0.57717724 0.49542651 0.58337632 0.59851278 0.38822082 0.53322473	0.24471493 0.31127358 0.25503177 0.32377817 0.35550497 0.31859442
		0.5481733 0.46003363 0.46908443 0.47130846]	0.44518333 0.41423159 0.27298908 0.34019062]
10 DAS	pif3	[0.57643351 0.57289493 0.56915486 0.57090659 0.54528025 0.38643474	[0.42483278 0.30498421 0.37761467 0.38999647 0.3474632 0.32555424	9.38855	1.94742e-10	TRUE
		0.53883152 0.56195163 0.5720966 0.49866158 0.5058073 0.42858886	0.39964532 0.30387573 0.35553178 0.3612786 0.323181 0.3385417
		0.5289393 0.40982227 0.52054046]	0.25474085 0.34658449 0.34474042 0.28102759 0.28336137]
10 DAS	pif7-1	[0.54116992 0.5295061 0.55066952 0.54077398 0.54317977 0.49861358	[0.37154567 0.4235049 0.39511656 0.46600791 0.23413457 0.17686436	8.14994	2.08001e-09	TRUE
		0.55249353 0.53749115 0.5550123 0.43911346 0.37106198 0.55132622	0.33895808 0.37498107 0.29039633 0.37348577 0.3169842 0.35049915
		0.55633147 0.51298048 0.51432768 0.40554777 0.56059875 0.49286046]	0.36132702 0.2726228 0.32299013 0.40127426 0.30991263]
10 DAS	pif7-2	[0.58489231 0.53761078 0.52749789 0.57242383 0.50551713 0.55935638	[0.27862834 0.38209905 0.38348684 0.30563291 0.3134107 0.2452416	7.62208	1.35562e-08	TRUE
		0.3812576 0.42798177 0.42609079 0.56500561 0.4654703 0.48731019	0.37039594 0.33329286 0.16524069 0.33965002 0.3290633 0.27421935
		0.49507539 0.54139108 0.35819297 0.53512148 0.53290052]	0.42721688 0.35307322 0.38970525 0.23162834]
10 DAS	pif3 pif7	[0.49127549 0.52276261 0.53179308 0.51467346 0.51844961 0.51255206	[0.45638022 0.37447029 0.41611511 0.37848078 0.3832475 0.36946677	7.89381	3.41785e-09	TRUE
		0.49308995 0.52794854 0.5394985 0.31216738 0.51788005 0.49617937	0.35544349 0.31060404 0.30730191 0.29971539 0.244521 0.30393785
		0.5418823 0.53125854 0.55177374 0.56574972 0.53495608 0.51856919]	0.36612061 0.41420121 0.45413816 0.37161781 0.20542245 0.25231161]
12 DAS	Col-0	[0.48714316 0.51599881 0.48869514 0.49203032 0.52558047 0.48601382	[0.3639438 0.34969323 0.36796358 0.39810157 0.31815256 0.32185299	13.4221	0	TRUE
		0.51077442 0.47028353 0.49885052 0.47446541 0.49639671 0.48970598	0.36494461 0.36737192 0.40922271 0.36676444 0.38231121 0.30216753
		0.47764224 0.51814206 0.49146056 0.4491385 0.44126575]	0.34842093 0.35801309 0.28032733 0.32679444 0.2835332 ]
12 DAS	35S::PIF4	[0.46957524 0.40360822 0.42028325 0.42291624 0.45889115 0.46725393	[0.30018101 0.34096013 0.31921578 0.41595876 0.22938584 0.33143422	6.74229	1.28946e-07	TRUE
		0.3783525 0.38112303 0.31309096 0.42358078 0.48134497 0.33182568	0.29341497 0.33038143 0.29829817 0.30929065 0.2746765 0.36211679
		0.44569094 0.41780091 0.45649036 0.38545479]	0.28054181 0.27217032 0.25373429 0.36431599 0.28394886 0.25219293]
12 DAS	phyb	[0.45027449 0.5114868 0.5368685 0.46690343 0.46031944 0.48349185	[0.27374095 0.30322504 0.27212029 0.30854434 0.36316914 0.22433481	11.3845	0	TRUE
		0.46130679 0.48169801 0.48807763 0.48692723 0.4330529 0.44321236	0.28003197 0.37801424 0.32904143 0.38059036 0.33968875 0.35814708
		0.48305871 0.46086403 0.48162567 0.40921314 0.3699606 0.47017542]	0.29675233 0.3378046 0.29341706 0.30976347 0.29310697 0.3467527 ]
12 DAS	pif4	[0.53203194 0.53755503 0.46955167 0.51382213 0.52631371 0.5049244	[0.39373414 0.33936284 0.37557186 0.33157501 0.46735316 0.40663189	12.615	0	TRUE
		0.49782856 0.52807115 0.50572585 0.543388 0.51240787 0.51214848	0.28035115 0.42102796 0.30451461 0.32577517 0.37321071 0.36352769
		0.52095792 0.55522584 0.54481793 0.485228 0.4980079 0.48888728]	0.38054235 0.36977378 0.34766226 0.28080735 0.33175289 0.3229247 ]
12 DAS	pifq	[0.50759414 0.50784316 0.50155143 0.45942838 0.48772866 0.49661664	[0.32909394 0.35126119 0.36654171 0.26521104 0.33919871 0.30282139	13.0497	0	TRUE
		0.5623668 0.51551566 0.50135529 0.55076376 0.47312956 0.5290871	0.32844502 0.3793454 0.40691166 0.36957525 0.37456691 0.39991364
		0.48269713 0.52554842 0.50968829 0.49774355 0.40962343 0.46967638]	0.35059067 0.34060359 0.31108594 0.2912597 0.31947768 0.3521606 ]
12 DAS	pif3	[0.51843536 0.46976737 0.47452833 0.48699217 0.5190755 0.5068355	[0.24336601 0.36469331 0.34731002 0.33147138 0.38185081 0.42774275	8.05451	2.17298e-09	TRUE
		0.46782114 0.47096041 0.50156637 0.44586258 0.51735475 0.5052168	0.37371641 0.40090841 0.39135352 0.34269919 0.39745273 0.4018825
		0.48352016 0.46912836 0.49383769 0.50471756 0.33234354 0.44812459]	0.37350607 0.3826199 0.34213447 0.32977181 0.3988955 0.32978484]
12 DAS	pif7-1	[0.54014848 0.54043936 0.55310959 0.52274698 0.46984713 0.50929963	[0.43158591 0.3245164 0.36631208 0.36240501 0.33601341 0.33566072	10.8329	0	TRUE
		0.56913607 0.53503897 0.48261533 0.55365654 0.38270011 0.54057745	0.34519449 0.40638484 0.38505822 0.39791748 0.37047878 0.42037659
		0.51642658 0.47386186 0.52555143 0.48427544 0.51308675 0.52648292]	0.38583513 0.32970958 0.27933799 0.27814092 0.32462818 0.31693708]
12 DAS	pif7-2	[0.50482492 0.53606992 0.48236159 0.55260181 0.51592915 0.51555064	[0.36959548 0.30243165 0.38401978 0.39680396 0.37952599 0.37671961	12.1662	0	TRUE
		0.52637096 0.49598072 0.48529305 0.55881004 0.52198506 0.51564381	0.41514407 0.35300287 0.38720814 0.34079366 0.40534953 0.28586226
		0.56088807 0.48898889 0.51007079 0.43493917 0.48346833]	0.32696485 0.30063176 0.35065254 0.271619 0.31020074]
12 DAS	pif3 pif7	[0.52253481 0.49082146 0.5492711 0.52017382 0.46935993 0.49278294	[0.30990617 0.35095326 0.3204256 0.3523344 0.37455985 0.29794172	12.5457	0	TRUE
		0.48779242 0.53295402 0.41047097 0.52470875 0.52299735 0.49431235	0.34683478 0.28073211 0.36106385 0.34885549 0.37379327 0.3786202
		0.54545579 0.44456258 0.50504385 0.45956907 0.43183486 0.4791187 ]	0.36722421 0.35342524 0.39821543 0.34103836 0.36913153 0.33504457]
14 DAS	Col-0	[0.45271369 0.48247258 0.4885677 0.48669092 0.44540176 0.45827875	[0.40155614 0.42347599 0.45934841 0.41948786 0.37044077 0.45572209	5.21417	1.06572e-05	TRUE
		0.48435699 0.52090578 0.49550319 0.52121268 0.4954093 0.50626488	0.43975666 0.38602747 0.47047635 0.45676285 0.45010261 0.43608239
		0.49371684 0.48093995 0.46525411 0.44677787 0.44633844]	0.42682427 0.48007515 0.37380816 0.37699663 0.35328288]
14 DAS	35S::PIF4	[0.4303637 0.43972338 0.41344196 0.38490339 0.46510093 0.39445634	[0.35337853 0.51412195 0.40583906 0.37254034 0.38117202 0.37232428	4.10405	0.000261215	TRUE
		0.474851 0.44477052 0.37466231 0.45120026 0.43436942 0.4498227	0.43376689 0.37767779 0.34007606 0.3844337 0.37774258 0.25820605
		0.40328169 0.4987048 0.42422109 0.4021877 0.44242842]	0.33948842 0.36059166 0.31463911 0.26395446 0.32677551]
14 DAS	phyb	[0.45756779 0.44545364 0.43944198 0.43311213 0.43002303 0.354462	[0.33333796 0.42763061 0.36939115 0.39087838 0.45841761 0.29212538	6.11868	6.04318e-07	TRUE
		0.46583557 0.44373789 0.4036442 0.470146 0.4923144 0.47551047	0.33791565 0.33379505 0.33153593 0.41322351 0.36709918 0.37612286
		0.43646644 0.44298753 0.4341664 0.39295499 0.45850387 0.4461313 ]	0.30518568 0.29878568 0.32646881 0.39489555 0.27499594 0.36123421]
14 DAS	pif4	[0.44773971 0.49276601 0.46670428 0.49821976 0.50909389 0.52660021	[0.44613245 0.39921504 0.4500238 0.3754502 0.27406194 0.4585041	5.22196	8.84887e-06	TRUE
		0.49402928 0.49053538 0.51964113 0.51596553 0.49033773 0.53327992	0.46222538 0.51510043 0.44337443 0.46064213 0.41223362 0.48884149
		0.55446286 0.51720963 0.5036491 0.5313971 0.48752859 0.48381003]	0.4107991 0.49639693 0.42160478 0.42083117 0.41242084 0.38725679]
14 DAS	pifq	[0.50986599 0.42295753 0.45570265 0.45929555 0.46819943 0.46206334	[0.45197634 0.48041693 0.48011519 0.3990811 0.40940912 0.40597731	1.8885	0.0680522	FALSE
		0.51228014 0.48108412 0.5021561 0.45792199 0.53612871 0.53933352	0.4290769 0.50246614 0.4612676 0.42498983 0.48612046 0.50423428
		0.47532914 0.46580622 0.49173324 0.36900345]	0.48725035 0.44285836 0.42721682 0.45602099 0.41521804 0.45303895]
14 DAS	pif3	[0.41553256 0.41922031 0.48882144 0.49460634 0.47969149 0.50226665	[0.4063834 0.40449079 0.38123134 0.40155793 0.48575579 0.46552686	2.85148	0.00734802	TRUE
		0.51240766 0.48907173 0.49304506 0.49425751 0.48336525 0.44561012	0.41272651 0.50461717 0.44625497 0.44938592 0.5034793 0.43149972
		0.42055705 0.44937616 0.42884015 0.45662753 0.45381033 0.45201338]	0.43550414 0.41516904 0.4160639 0.44137807 0.40779294 0.36415241]
14 DAS	pif7-1	[0.47469113 0.53650271 0.48713958 0.51235656 0.48995784 0.52473565	[0.48751695 0.42383941 0.43170202 0.45539424 0.42454091 0.39962821	5.95837	1.0904e-06	TRUE
		0.51984925 0.53824754 0.52981596 0.54878239 0.43145951 0.54020444	0.51241969 0.45909741 0.47219905 0.48848327 0.44982116 0.44901112
		0.53227503 0.50305249 0.5334598 0.52905927 0.49991966 0.47969917]	0.44671205 0.39561892 0.42396003 0.47657616 0.38754085]
14 DAS	pif7-2	[0.53702247 0.4920406 0.51738875 0.52054025 0.49220688 0.50465734	[0.41337025 0.42135361 0.36556751 0.40776286 0.46354197 0.46061048	7.8523	5.86108e-09	TRUE
		0.45093007 0.54770638 0.55321642 0.54032726 0.55323632 0.5578299	0.4709669 0.45244794 0.48967642 0.40019609 0.46503861 0.46360399
		0.54429298 0.52696075 0.5262266 0.50264923 0.49660983]	0.36214625 0.43566602 0.44443899 0.42605113 0.43256318]
14 DAS	pif3 pif7	[0.52075206 0.52550992 0.55069503 0.53626847 0.51200565 0.46283621	[0.43521054 0.50314755 0.464303 0.48001358 0.45852346 0.41837196	5.50423	3.79921e-06	TRUE
		0.49432985 0.4861704 0.52500498 0.54725719 0.53481435 0.54161312	0.40336035 0.40322151 0.42500305 0.4298236 0.43605902 0.44684014
		0.52585505 0.41334983 0.44203134 0.49116263 0.53302595 0.51396345]	0.41406119 0.43353756 0.48568849 0.46631543 0.47210664 0.4680482 ]
16 DAS	Col-0	[0.43221809 0.48206083 0.50073227 0.50373284 0.44381367 0.46539713	[0.42536039 0.44349059 0.42886337 0.37708101 0.36810611 0.42212169	6.52501	2.3954e-07	TRUE
		0.47990717 0.47825701 0.47487254 0.48969321 0.48639664 0.4715779	0.43442322 0.42598585 0.4145952 0.35968392 0.37144303 0.41400602
		0.48492113 0.46583924 0.4847558 0.45851013 0.46578269]	0.42287838 0.46424171 0.41700495 0.46284878 0.44040344]
16 DAS	35S::PIF4	[0.38184328 0.45363619 0.42939681 0.26582296 0.4000381 0.3746079	[0.33326814 0.35324462 0.30733914 0.40717438 0.38183763 0.31117833	3.35931	0.00203223	TRUE
		0.36566137 0.45611798 0.43265562 0.40871141 0.39370852 0.41620386	0.36252394 0.32942324 0.35315058 0.28125914 0.27540745 0.30917238
		0.40244228 0.21511551 0.42706745 0.40647628]	0.29348903 0.29601666 0.32390396 0.35423477 0.35620825 0.32158843]
16 DAS	phyb	[0.3863585 0.41053626 0.44240712 0.451325 0.45411317 0.38509216	[0.34649474 0.34416802 0.36412428 0.36225641 0.39975762 0.40062191	6.86064	7.84893e-08	TRUE
		0.45927732 0.43069759 0.49734755 0.45539109 0.44653917 0.47157606	0.3163263 0.30024911 0.36663853 0.31543912 0.32941718 0.4185354
		0.41758651 0.41214803 0.3725672 0.43287324 0.46320968 0.4860495 ]	0.37854761 0.39405865 0.35548767 0.35936615 0.35385138]
16 DAS	pif4	[0.47214396 0.51158691 0.51902273 0.48158688 0.50652326 0.49403037	[0.402919 0.43786833 0.41268857 0.41850889 0.43400604 0.4398449	9.0716	1.33019e-10	TRUE
		0.4831192 0.54086791 0.53272909 0.54474676 0.50853153 0.53126808	0.4698898 0.45994457 0.4655607 0.40989349 0.46686718 0.42199607
		0.56469982 0.51255371 0.52068131 0.52308264 0.46673022 0.50701098]	0.46471077 0.4273791 0.45808325 0.44454789 0.45452878 0.42217527]
16 DAS	pifq	[0.51713228 0.43853021 0.48078932 0.45977128 0.49354227 0.4543578	[0.45217562 0.40704479 0.43180498 0.43327441 0.41577444 0.40014107	4.96896	2.02128e-05	TRUE
		0.46934481 0.48271234 0.45099878 0.49684616 0.49666393 0.5355323	0.42150134 0.44569725 0.4067442 0.41488805 0.42065628 0.41767112
		0.48309268 0.52488555 0.40617721 0.4760516 0.40320757]	0.43893525 0.39228133 0.4420308 0.42320871 0.45247137 0.45168241]
16 DAS	pif3	[0.43780549 0.459177 0.47779934 0.47771549 0.47257872 0.46636664	[0.42624268 0.44965504 0.41924352 0.40416574 0.41235179 0.40973936	4.78133	3.29373e-05	TRUE
		0.49879127 0.48372597 0.4990469 0.48291901 0.48196411 0.47482529	0.41432051 0.45644697 0.4124193 0.44342965 0.4547222 0.44816412
		0.43548126 0.44357699 0.45593804 0.40066574 0.45390798 0.41657688]	0.34685213 0.42182316 0.40949028 0.41693314 0.41900411 0.38078664]
16 DAS	pif7-1	[0.49907823 0.53881504 0.49546539 0.49323308 0.5162719 0.52982195	[0.43577 0.4181426 0.38455768 0.42657016 0.33585882 0.44509597	8.19891	1.45021e-09	TRUE
		0.5173829 0.54046289 0.52962831 0.53671419 0.48551969 0.53487742	0.45590945 0.40641638 0.4830203 0.4521095 0.39615207 0.42786025
		0.52197053 0.51181054 0.51473476 0.53483836 0.48967582 0.4514843 ]	0.4610251 0.46324399 0.45959411 0.44170415 0.45580031 0.39682398]
16 DAS	pif7-2	[0.50250334 0.5125518 0.49356615 0.47855049 0.46629107 0.44287824	[0.46872396 0.44288854 0.42479258 0.4018754 0.43026801 0.46615959	8.08996	3.07922e-09	TRUE
		0.51991793 0.54933905 0.54281709 0.52325418 0.52037024 0.50061414	0.42061185 0.4321899 0.34891718 0.3860375 0.41682166 0.40892903
		0.52173462 0.52608735 0.47158234 0.48152722 0.45760303]	0.40000944 0.41448351 0.38247547 0.38146352 0.43832121]
16 DAS	pif3 pif7	[0.49482417 0.51284406 0.54378789 0.52172619 0.50182584 0.48951719	[0.42390589 0.42799464 0.39802791 0.36714754 0.45209038 0.47923519	7.89358	3.42012e-09	TRUE
		0.50511982 0.51508257 0.53102332 0.52043343 0.54383577 0.52556598	0.45189307 0.44276136 0.43850911 0.48318203 0.44552188 0.43509433
		0.52497091 0.48456983 0.45685829 0.49556697 0.50310424 0.50014524]	0.48549822 0.45074252 0.44384559 0.46329747 0.41733251 0.44631703]
23 DAS	Col-0	[0.48167949 0.52659592 0.59184146 0.52166797 0.4752997 0.53139726	[0.46877914 0.5106015 0.48869584 0.48795436 0.49317187 0.48842622	3.68878	0.000832234	TRUE
		0.51021523 0.51572009 0.50890522 0.53896977 0.52252348 0.51994475	0.48668198 0.48092968 0.48101375 0.4616712 0.47989796 0.50870157
		0.52994026 0.49754449 0.50999456 0.4504951 0.49757026]	0.47793413 0.47985972 0.49808249 0.46152377 0.46517633]
23 DAS	35S::PIF4	[0.44883998 0.46246651 0.45240173 0.43437276 0.44210332 0.44148423	[0.43600426 0.46398452 0.42784074 0.45913477 0.45855219 0.46895633	2.28318	0.0287921	TRUE
		0.4500254 0.46438605 0.46901248 0.50243831 0.48026733 0.44427309	0.45414661 0.41810646 0.42544358 0.44792208 0.40961487 0.44164062
		0.46904555 0.46506198 0.52463128 0.39808749 0.35816498 0.46151799]	0.3795445 0.41706457 0.40784753 0.40366233 0.42193348 0.40244482]
23 DAS	phyb	[0.44526893 0.4709753 0.45687996 0.46974989 0.49163428 0.45933847	[0.45232605 0.46514719 0.45938447 0.42874113 0.45422804 0.45832381	2.51597	0.0172627	TRUE
		0.4507783 0.43963394 0.47465077 0.54595028 0.49326762 0.47097545	0.47517273 0.44237044 0.41568649 0.429249 0.44546697 0.4521799
		0.44891233 0.5931261 0.42518551 0.42534349]	0.41918084 0.4362457 0.4537561 0.41272616 0.4436451 ]
23 DAS	pif4	[0.50369324 0.55558405 0.54176266 0.50903722 0.51714607 0.52963896	[0.50974301 0.47635035 0.4849088 0.49970348 0.51785764 0.51065533	6.34481	3.08266e-07	TRUE
		0.5182178 0.53819525 0.53808388 0.57324396 0.53840576 0.55283618	0.49195021 0.4962856 0.49485101 0.50609675 0.46613859 0.49419947
		0.58247312 0.55401376 0.52954229 0.54587952 0.48888916 0.52243427]	0.49608634 0.49409973 0.49751518 0.46035471 0.49752043 0.49403947]
23 DAS	pifq	[0.53379825 0.50176699 0.52562607 0.50299887 0.52942471 0.47712719	[0.47458335 0.48793751 0.47838344 0.48872164 0.4799509 0.44553178	2.28615	0.0287981	TRUE
		0.51051567 0.51068186 0.47842955 0.51390269 0.51729638 0.54587667	0.51108214 0.50634643 0.50550431 0.47934883 0.53053346 0.50099451
		0.51875721 0.5073976 0.46279439 0.52083005 0.44680631]	0.50613374 0.49324003 0.49443744 0.46682045 0.48055032 0.44831407]
23 DAS	pif3	[0.46296642 0.4833085 0.49375315 0.49318465 0.50184525 0.48817296	[0.48950034 0.50783673 0.51306558 0.49980764 0.46857996 0.50650717	0.575937	0.568451	FALSE
		0.5227892 0.52836094 0.52049881 0.51386429 0.4897762 0.48047647	0.481578 0.48538638 0.48038178 0.48949667 0.5238964 0.45148655
		0.49504635 0.50692707 0.43161724 0.44434664 0.52939689 0.45304969]	0.46564465 0.48232227 0.50523539 0.49466833 0.45404144 0.45284217]
23 DAS	pif7-1	[0.52932429 0.54400161 0.51092117 0.52934551 0.51339004 0.55203219	[0.48504332 0.49632708 0.50571944 0.47843943 0.49085142 0.52297469	6.32071	3.31143e-07	TRUE
		0.53900464 0.54680736 0.53797791 0.54185486 0.55797856 0.5568297	0.5241866 0.50256785 0.52131294 0.50266131 0.51467779 0.51720016
		0.54807089 0.54308516 0.52600324 0.54669617 0.52897094 0.49369305]	0.48398179 0.45948998 0.44936406 0.49262662 0.49413939 0.47527456]
23 DAS	pif7-2	[0.52931084 0.5373087 0.52962467 0.51356011 0.49124107 0.47260266	[0.49274398 0.48780203 0.47041712 0.51448418 0.49382036 0.50135256	3.65302	0.000918072	TRUE
		0.53616383 0.56634673 0.55480145 0.53837034 0.5489673 0.53296885	0.48727965 0.50828852 0.52485658 0.50526953 0.50929492 0.51240977
		0.54481529 0.53225609 0.51621081 0.50517158 0.48788193]	0.47945695 0.50641335 0.51128744 0.40426884 0.44773168]
23 DAS	pif3 pif7	[0.51875089 0.53638006 0.54493168 0.54712329 0.5348095 0.52636873	[0.48375865 0.48578706 0.50273009 0.5186963 0.52925316 0.5011648	5.90241	1.15294e-06	TRUE
		0.54862199 0.55143788 0.55323209 0.5430811 0.55606837 0.55084551	0.50564204 0.47982236 0.51821824 0.48783992 0.49396476 0.50329507
		0.53934966 0.49555388 0.50672035 0.51603049 0.53294686 0.5169468 ]	0.49515086 0.48412906 0.49105055 0.49569535 0.41253778 0.47703601]
30 DAS	Col-0	[0.51103863 0.49913338 0.53888463 0.48480655 0.48908835 0.51026596	[0.49723553 0.48050005 0.50157809 0.48565733 0.51168932 0.48308224	0.311838	0.757187	FALSE
		0.46009063 0.50655845 0.54151911 0.54006536 0.52783572 0.51123945	0.50466732 0.53155019 0.51205788 0.51899181 0.51220596 0.49670485
		0.50122293 0.47520232 0.53704771 0.52220062 0.42258507]	0.50738158 0.49380635 0.47931374 0.52044576 0.49685916]
30 DAS	35S::PIF4	[0.09804098 0.45817836 0.5015831 0.49045975 0.43429595 0.65110674	[0.43196579 0.43067325 0.48471773 0.53053149 0.4759571 0.46366396	1.0861	0.285078	FALSE
		0.52660927 0.57220638 0.56633345 0.53587971 0.57487923 0.5743882	0.42142977 0.48159458 0.43178098 0.47177448 0.45997169 0.46064054
		0.50128823 0.5130978 0.48073978 0.41947915 0.47351008 0.46607418]	0.45573323 0.49338425 0.47431714 0.41122775 0.45301081 0.46412853]
30 DAS	phyb	[0.50475303 0.45645227 0.91635753 0.46717788 0.49492317 0.65912486	[0.4208979 0.45632931 0.4512626 0.46312294 0.44480337 0.39874873	2.58117	0.014479	TRUE
		0.53339326 0.49618498 0.55194466 0.52199692 0.53318107 0.50084763	0.47551019 0.40058127 0.44502076 0.43914604 0.50898468 0.47855811
		0.4558442 0.52981997 0.45309302 0.45726918 0.4790225 0.42211139]	0.46717483 0.46059655 0.47678413 0.48198005 0.41580635]
30 DAS	pif4	[0.51382642 0.57582914 0.50165859 0.52521422 0.54725715 0.51255646	[0.48578461 0.51166565 0.5182254 0.51511365 0.50415586 0.50633684	1.97913	0.0559456	FALSE
		0.51906621 0.52945074 0.53431459 0.49467723 0.56715691 0.5494378	0.53055984 0.53975729 0.52744432 0.51901384 0.50540406 0.53141763
		0.54688462 0.49366718 0.51292523 0.51267229 0.48416454 0.52132151]	0.50676602 0.50909876 0.52867568 0.45904577 0.47687306 0.49353634]
30 DAS	pifq	[0.53289022 0.51484345 0.50713226 0.52496924 0.5266067 0.5132435	[0.49918542 0.49905381 0.50638267 0.47484709 0.49035915 0.52541814	1.30271	0.201693	FALSE
		0.50882654 0.47619885 0.49744397 0.5304604 0.54951069 0.53027384	0.51085692 0.50064363 0.51013611 0.51756045 0.50229681 0.51628908
		0.5372132 0.52200605 0.52374075 0.48960662 0.41622349]	0.50508189 0.5152552 0.51267634 0.47706518 0.49147733 0.46662953]
30 DAS	pif3	[0.47655159 0.50612461 0.46916043 0.50214483 0.53425842 0.54873418	[0.50702453 0.5084331 0.50780777 0.50544371 0.50545313 0.49085597	1.1948	0.240434	FALSE
		0.55755209 0.50433237 0.54081098 0.53046255 0.72006709 0.4816853	0.47803801 0.48445052 0.47648808 0.47505582 0.53281082 0.5138277
		0.54678515 0.5101459 0.47430102 0.5546463 0.43215531 0.41468978]	0.4984638 0.4975561 0.49526186 0.51901304 0.50509077 0.46054466]
30 DAS	pif7-1	[0.48961199 0.51500375 0.54858952 0.51373586 0.56162566 0.57885497	[0.51142512 0.51134272 0.50648152 0.51216704 0.54215162 0.50847615	2.60683	0.0134711	TRUE
		0.57393845 0.53933716 0.59415753 0.55287825 0.54541763 0.54547097	0.53225505 0.5370021 0.53553616 0.53834876 0.54963295 0.52703043
		0.54433164 0.54301753 0.55586915 0.57460578 0.47504327 0.52147665]	0.53433467 0.53897909 0.46512436 0.50097912 0.5143337 0.49464209]
30 DAS	pif7-2	[0.54628689 0.524174 0.50080177 0.49899313 0.5293246 0.55311505	[0.51648928 0.51889107 0.49733505 0.52426574 0.53585228 0.51378553	0.499937	0.62054	FALSE
		0.49697411 0.52462461 0.54593227 0.52240977 0.53227972 0.52398776	0.53510052 0.52579137 0.54289036 0.52564515 0.51933329 0.5284814
		0.54684462 0.51836373 0.52513832 0.43631609 0.510267 ]	0.51857732 0.5245026 0.51663052 0.44465953 0.47244436]
30 DAS	pif3 pif7	[0.52733807 0.53534683 0.55096328 0.50682478 0.46365228 0.51868013	[0.51266635 0.52546229 0.50926046 0.49362809 0.53169147 0.52724072	2.21986	0.0332001	TRUE
		0.52201092 0.50824138 0.60263191 0.58518003 0.55147382 0.55802249	0.53021165 0.52473301 0.54978031 0.53878101 0.51460699 0.50386825
		0.54068797 0.52829595 0.54896174 0.53281302 0.51597207 0.51744483]	0.49215104 0.51391622 0.52747102 0.50392993 0.43789073 0.50749578]
32 DAS	Col-0	[0.48603524 0.50870756 0.50142008 0.53492876 0.49664662 0.45876341	[0.4890284 0.48100161 0.50127656 0.50654709 0.51976169 0.48256337	0.799423	0.42994	FALSE
		0.49714094 0.52809474 0.53968315 0.53289543 0.56727352 0.51053083	0.52062435 0.51831893 0.51759277 0.50604113 0.51149142 0.49658009
		0.516125 0.47577556 0.48779559 0.49822374 0.5131229 ]	0.50613551 0.50223645 0.4860046 0.50652557 0.50507228]
32 DAS	35S::PIF4	[0.51394779 0.44576648 0.52518031 0.4828615 0.52119557 0.49505578	[0.43244476 0.43215234 0.41190966 0.45531383 0.4863249 0.48893162	3.31981	0.00215785	TRUE
		0.5043366 0.56570032 0.48004932 0.57851826 0.56645686 0.51729529	0.43437974 0.4248262 0.42618457 0.52768605 0.45386402 0.44008423
		0.47526565 0.50589281 0.50267043 0.47912186 0.46380439 0.51534679]	0.46665237 0.60824614 0.52048192 0.40619367 0.43481769 0.38072625]
32 DAS	phyb	[0.47075814 0.57097313 0.53669452 0.4877886 0.54968039 0.51029593	[0.41994707 0.44961462 0.46128354 0.45309556 0.40116848 0.4203655	4.8152	3.17667e-05	TRUE
		0.46544983 0.52704609 0.5052726 0.50989492 0.48326518 0.51556351	0.46530122 0.42551101 0.45054087 0.43517605 0.5092597 0.45661201
		0.48059722 0.51718814 0.49444363 0.43829979 0.45252298 0.57520983]	0.47932166 0.44825149 0.50116029 0.45163762 0.42272044]
32 DAS	pif4	[ 0.49220993 0.53124311 0.54968021 0.51715435 0.51430582 0.49377274	[0.50314084 0.51468092 0.52170262 0.53102449 0.50627214 0.51399093	-0.87506	0.387681	FALSE
		0.52562863 0.51443403 0.51078192 0.54228152 0.56882192 0.5552696	0.5263153 0.5319808 0.52439681 0.51911591 0.51076242 0.54028071
		0.54027505 0.55513346 -1.73922767 0.51657059 0.53100814 0.50554519]	0.49506751 0.49876285 0.52330184 0.46534099 0.48844232 0.49643754]
32 DAS	pifq	[0.51597181 0.48228837 0.47563292 0.49108014 0.51508655 0.48943429	[0.5060357 0.49122753 0.51468707 0.49382794 0.50349094 0.53245644	1.15372	0.256902	FALSE
		0.50790417 0.51283777 0.49108804 0.53691769 0.53376595 0.54873451	0.51001509 0.49296771 0.50371021 0.50111591 0.5094229 0.50168048
		0.53452844 0.52388695 0.52038053 0.5111587 0.44349622]	0.50507033 0.5046663 0.50833126 0.46681876 0.47362896 0.46964682]
32 DAS	pif3	[0.47808134 0.51412342 0.49620957 0.53408556 0.53391621 0.52735731	[0.50348959 0.50654834 0.50714024 0.50260191 0.51192407 0.49928033	-0.758809	0.453195	FALSE
		0.41352883 0.5358603 0.48704273 0.4800401 0.46443419 0.42402243	0.49169248 0.48399591 0.4632904 0.47501251 0.52973239 0.51214249
		0.50685022 0.48831581 0.4874442 0.48729516 0.4830481 0.47294174]	0.4938018 0.48863835 0.49192772 0.5069869 0.50610107 0.4631903 ]
32 DAS	pif7-1	[ 5.05768017e-01 5.23283604e-01 5.03187044e-01 -6.13491439e+02	[0.51864596 0.51164108 0.5205017 0.52786801 0.56221519 0.51431577	-0.999803	0.324469	FALSE
		5.36881847e-01 5.54442328e-01 5.31868136e-01 5.51309945e-01	0.52537206 0.53794873 0.54368654 0.54146326 0.54232115 0.52729171
		5.26715090e-01 5.55095364e-01 5.47418600e-01 5.38921765e-01	0.54882193 0.53899431 0.4684893 0.5101599 0.51771752 0.50624024]
		5.72919115e-01 5.07807287e-01 5.26156837e-01 5.41646599e-01
		5.05508817e-01 5.23158951e-01]
32 DAS	pif7-2	[0.48800028 0.4973458 0.52584618 0.48700834 0.50141095 0.51425654	[0.51399299 0.52724915 0.51072031 0.51734091 0.54869212 0.50504879	-1.05873	0.297651	FALSE
		0.51495375 0.5058273 0.53736584 0.51691568 0.51601999 0.49103068	0.52723769 0.52835758 0.54556823 0.53748698 0.5091945 0.53287404
		0.46975494 0.51214993 0.49806744 0.54379241 0.51382179]	0.51284146 0.52737828 0.50326997 0.44391741 0.47929191]
32 DAS	pif3 pif7	[0.506921 0.49560763 0.50861763 0.527717 0.53649334 0.54080565	[0.51487828 0.52245863 0.5310674 0.51974075 0.53546631 0.5426687	0.490242	0.627111	FALSE
		0.51131565 0.50990832 0.57495617 0.54548621 0.5362346 0.53040959	0.52037954 0.51476219 0.55373409 0.54205099 0.51728877 0.50839917
		0.51604022 0.50221909 0.54919898 0.50130667 0.50801197 0.49228863]	0.50995749 0.5077172 0.52395952 0.50856285 0.44380348 0.51048598]
35 DAS	35S::PIF4	[0.47022355 0.50692926 0.86245547 0.60729161 0.47062995 0.46321673	[0.44906244 0.43611278 0.44596123 0.42668115 0.51614744 0.38034512	3.2166	0.00284548	TRUE
		0.53756971 0.50561528 0.44949917 0.52385672 0.49835197 0.5317638	0.40138771 0.41981385 0.45798668 0.50242587 0.48604813 0.45449906
		0.50564431 0.5607621 0.46613124 0.48391388 0.56710782 0.41688258]	0.41934851 0.45330546 0.45694502 0.45553564 0.43456676 0.44115163]
35 DAS	phyb	[0.53968948 0.48630463 0.49137643 0.53259414 0.39950208 0.6642762	[0.55090942 0.49080257 0.44216003 0.44330836 0.51528868 0.42463404	2.7148	0.0103422	TRUE
		0.52570649 0.4995107 0.53305437 0.47560541 0.58952309 0.56212258	0.46137307 0.49866024 0.44352702 0.49750814 0.45412371 0.48304025
		0.56986316 0.49236665 0.50851908 1.03103399 0.48921224 0.53448228]	0.47939328 0.49075157 0.42644778 0.37419682 0.42980964 0.42751793]
35 DAS	pif4	[0.5329082 0.6990479 0.53596024 0.50527996 0.51540621 0.53573714	[0.5218936 0.51735405 0.53405063 0.53795319 0.51306251 0.5349193	2.3313	0.0258015	TRUE
		0.53787752 0.57794511 0.5281 0.53938892 0.58338664 0.53917892	0.52711715 0.52827108 0.54437305 0.53233843 0.51725726 0.52487354
		0.56755839 0.54633937 0.54355121 0.51904728 0.50775615 0.53511529]	0.51718673 0.53784543 0.50461513 0.46784124 0.50769193 0.51865811]
35 DAS	pif7-1	[0.50273033 0.50575605 0.52799054 0.50707815 0.45323174 0.42713342	[0.54208234 0.54775203 0.53674288 0.50999838 0.53868088 0.53806155	-2.98483	0.00522619	TRUE
		0.48387443 0.55798972 0.55944568 0.51818839 0.53886496 0.50698905	0.52525463 0.51910594 0.51719665 0.56309409 0.56641322 0.55280536
		0.54232329 0.50141782 0.49101652 0.53085837 0.50397051 0.56050575]	0.55509989 0.55308213 0.52318313 0.5453343 0.57914641 0.51647515]
35 DAS	pif7-2	[0.49193264 0.50716354 0.51931205 0.50426945 0.51101877 0.49926056	[0.5128108 0.53323622 0.53140769 0.49914421 0.48655019 0.55810681	-2.39388	0.0227039	TRUE
		0.41443634 0.37148746 0.57695023 0.58280929 0.537522 0.50360402	0.50044293 0.55650521 0.54629114 0.56633959 0.56467167 0.52724358
		0.50537426 0.51084551 0.50376795 0.47874606 0.53239539]	0.54502053 0.55902096 0.56001323 0.52523677 0.53046878]
35 DAS	Col-0	[0.51618414 0.71442179 0.51898436 0.52428605 0.5099517 0.53289183	[0.52115115 0.47545101 0.50739208 0.51688834 0.51862213 0.51983471	1.97033	0.0575046	FALSE
		0.51929242 0.55660668 0.55172028 0.51672133 0.53842251 0.55806504	0.52536144 0.52330257 0.52265764 0.51443626 0.52843338 0.55016162
		0.53813644 0.55092206 0.50195833 0.54559243 0.52580153]	0.51429759 0.5616581 0.51507344 0.49651852 0.49054592]
35 DAS	pifq	[0.52343416 0.52393873 0.51838845 0.48313245 0.49982755 0.5342775	[0.51080016 0.51168948 0.50647604 0.49983281 0.50905354 0.50066889	0.845819	0.403745	FALSE
		0.52267199 0.53033327 0.48580623 0.56091046 0.5388878 0.55410495	0.51570245 0.53049085 0.50713296 0.53020135 0.52222575 0.55144636
		0.51635004 0.49345317 0.50753549 0.50595869 0.52445701]	0.5255624 0.49724929 0.52267331 0.50513576 0.52164396 0.47559824]
35 DAS	pif3	[0.49045648 0.42935149 0.53426181 0.50232005 0.52366931 0.48934701	[0.50923904 0.51886836 0.53298222 0.47567329 0.4945883 0.50097053	0.826993	0.414007	FALSE
		0.47585143 0.52508888 0.52430495 0.52756409 0.48907404 0.46734263	0.47519301 0.50611816 0.49278398 0.52950001 0.51579709 0.53689141
		0.50994777 0.51522108 0.53864776 0.5220181 0.60505309 0.61110142]	0.50817698 0.50875024 0.5153088 0.47644648 0.4918206 0.52510536]
35 DAS	pif3 pif7	[0.55547122 0.58099664 0.53562695 0.56243677 0.53158605 0.51743083	[0.50435092 0.55795243 0.54083471 0.48988059 0.51429559 0.55703792	-0.886216	0.381726	FALSE
		0.42066867 0.39430203 0.52576246 0.55567537 0.53306851 0.56445858	0.55198755 0.56051924 0.55603178 0.55585417 0.55901371 0.53224998
		0.54953833 0.51922884 0.5464645 0.52635762 0.50173373 0.5295479 ]	0.53450994 0.50455027 0.5381867 0.51685137 0.53673865 0.53504419]
