# Supplementary material for: Integrative phenotyping analyses reveal the relevance of the phyB-PIF4 pathway in Arabidopsis thaliana reproductive organs at high ambient temperature
Source: BMC Plant Biol. 2024 Jul 29;24:721. doi: 10.1186/s12870-024-05394-w (PMC11285529; doi:10.1186/s12870-024-05394-w)
Supplement: Supplementary file 10 — Additional File 3: Table S8 [file 12870_2024_5394_MOESM10_ESM.xlsx]

## Sheet: Col_nAT_A
Predicate	Pixel count	SSE	LS Ratio	Surface	Length	Width	Axes angle
1	939	28.68	5.09268	0.0916599	0.459282	0.250495	60.4774
1	715.333	33.1974	5.53899	0.0698268	0.386996	0.2387	62.6458
1	1072.67	20.3901	4.50934	0.104708	0.470823	0.288594	80.4445
1	739	9.9762	5.1516	0.072137	0.370253	0.233726	73.1175
1	921	16.4173	5.05418	0.0899029	0.450782	0.241504	82.8535
1	1083.67	17.9908	4.75451	0.105781	0.496826	0.243212	81.0316
1	997.333	15.4794	4.47932	0.0973541	0.435526	0.261387	72.6114
1	850.667	14.9884	4.88486	0.0830373	0.405554	0.248458	79.5195
1	781.667	9.2539	5.27497	0.0763019	0.401969	0.230608	84.8875
1	760.333	11.7987	4.90288	0.0742195	0.364085	0.238186	54.9045
1	760.667	47.983	5.39379	0.074252	0.399844	0.23662	63.7092
1	783.667	10.9376	5.26818	0.0764971	0.402334	0.231814	80.6805
1	950.667	16.1418	4.82763	0.0927988	0.447589	0.260508	74.9378
1	909.333	21.9874	4.75058	0.088764	0.420199	0.261144	68.8115
1	1077.33	13.5624	4.40647	0.105163	0.461532	0.269057	83.5382
1	770	30.0752	5.22526	0.0751631	0.392401	0.245168	78.7078
1	1072.67	20.3078	4.52635	0.104708	0.47352	0.265899	74.3311
1	814.333	9.23648	5.17138	0.0794907	0.405211	0.24938	67.2652
1	646	12.8484	5.5057	0.0630589	0.345667	0.229439	75.501
1	945	9.93943	4.94783	0.0922456	0.4561	0.258525	74.2121
1	925.333	14.6692	4.85297	0.0903259	0.436972	0.250121	65.4137
1	699.667	7.14397	5.39056	0.0682975	0.368108	0.227872	63.831
1	918.667	30.1301	4.93035	0.0896751	0.438989	0.257617	77.2735
1	797.333	9.8011	5.28355	0.0778312	0.40954	0.235483	84.0811
1	963.667	9.64341	4.80179	0.0940677	0.450484	0.243672	86.4296
1	1025.67	14.4608	4.79822	0.10012	0.478406	0.27004	84.9803
1	988.667	35.7643	4.83605	0.0965081	0.465517	0.274166	78.6871
1	971	17.0464	4.82389	0.0947836	0.457158	0.290877	66.4661
1	1013	53.3708	4.68704	0.0988834	0.463429	0.285836	77.6296
1	794.333	8.49437	4.83486	0.0775384	0.374245	0.231554	70.4189
1	797.333	29.1475	5.68505	0.0778312	0.440601	0.233529	74.8175
1	794.667	28.2141	5.36381	0.0775709	0.413968	0.224429	78.1419
1	869.333	13.313	4.79019	0.0848595	0.406396	0.25976	55.6408
1	863.667	18.1575	4.98922	0.0843063	0.418688	0.255485	63.7893
1	901.333	18.2438	4.95212	0.0879831	0.432734	0.260683	81.9841
1	946	22.3998	4.98006	0.0923432	0.459242	0.265991	66.8533
1	745.333	20.8859	5.20978	0.0727553	0.3773	0.229161	59.4144
1	1037	45.1753	4.35128	0.101226	0.440945	0.279843	76.0969
1	888	32.415	4.81329	0.0866816	0.416905	0.253036	65.2406
1	848.667	12.8197	5.30896	0.0828421	0.437732	0.252931	77.11
1	1022.67	10.9695	4.39915	0.099827	0.437322	0.270786	85.6428
1	891.333	10.2968	4.97361	0.087007	0.430466	0.254803	68.0009
1	916	32.9056	4.4841	0.0894148	0.398777	0.287991	79.9077
1	1037	13.3672	4.51187	0.101226	0.455109	0.279933	80.3134
1	661.333	9.41203	5.24402	0.0645557	0.337606	0.236389	71.7433
1	838	8.26085	5.25058	0.0818009	0.428269	0.221199	80.3342
1	657.333	6.53376	5.55194	0.0641652	0.356239	0.218615	84.3095
1	961.667	18.5991	4.99834	0.0938725	0.465639	0.251301	77.7813
1	942	9.67652	5.18157	0.0919528	0.46963	0.250128	76.968
1	694.333	10.5534	5.32607	0.0677769	0.359781	0.228379	82.7418
1	734	13.4875	5.17831	0.071649	0.36824	0.248698	75.6159
1	785.333	38.6277	5.24468	0.0766598	0.401402	0.241256	76.7964
1	896.667	8.53299	4.67601	0.0875276	0.409237	0.274107	74.0741
1	807.333	27.9664	4.98904	0.0788074	0.39172	0.243451	71.914
1	833.333	19.8358	5.18671	0.0813453	0.418836	0.245047	75.6887
1	925.667	11.9367	4.81463	0.0903584	0.434619	0.270433	83.2097
1	659	29.8605	5.85651	0.0643279	0.373133	0.210175	84.2234
1	690.667	15.3911	5.64795	0.067419	0.380829	0.236054	61.7356
1	881	18.3374	4.77368	0.0859983	0.407592	0.257846	74.6987
1	981.333	15.7546	5.16662	0.0957923	0.493954	0.272656	81.3244
1	1008.33	15.6363	4.49739	0.0984279	0.441285	0.264013	77.6729
1	864.333	26.3244	5.02721	0.0843714	0.422445	0.240075	80.4316
1	709.333	10.8147	5.61365	0.0692411	0.388353	0.232909	79.5935
1	825.667	20.4289	4.89824	0.080597	0.393414	0.260701	77.8717
1	1049.67	17.6624	4.56048	0.102463	0.465824	0.276216	83.3565
1	957	11.0659	5.00354	0.093417	0.461459	0.26452	85.1402
1	789.667	11.4678	5.28621	0.0770828	0.399844	0.230901	72.4463
1	917.333	15.1973	5.0108	0.0895449	0.448322	0.277516	63.4433
1	844	12.3834	5.01402	0.0823866	0.412469	0.248115	77.223
1	1089	9.69705	4.62773	0.106302	0.491548	0.266653	80.3756
1	799.667	14.4792	5.12837	0.078059	0.397819	0.258168	62.1654
1	833.667	15.1333	4.98422	0.0813779	0.403171	0.245027	75.6034
1	727	8.99591	5.2719	0.0709657	0.372223	0.234599	83.1195
1	728.667	10.8346	5.42451	0.0711284	0.384888	0.237028	65.7773
1	1137.67	23.7035	4.42643	0.111053	0.490178	0.299221	83.3573
1	954	8.29999	4.70138	0.0931241	0.436958	0.257007	80.1342
1	1107.33	11.0684	4.43015	0.108092	0.477081	0.281008	71.7615
1	759.667	15.0868	5.01627	0.0741544	0.370491	0.246518	70.0341
1	754.667	26.3855	5.21077	0.0736663	0.37976	0.251714	73.4638
1	808.333	7.30985	5.12246	0.078905	0.403803	0.256905	72.454
1	951	47.1138	4.93655	0.0928313	0.457325	0.273351	77.1978
1	845.333	32.5715	5.11344	0.0825167	0.421613	0.265899	80.6095
1	992.333	16.7042	4.87482	0.096866	0.470657	0.261873	81.4253
1	709.333	21.0343	5.44071	0.0692411	0.375468	0.233169	82.6288
1	749.333	10.383	5.12645	0.0731457	0.371761	0.240614	76.8642
1	974.333	19.1945	4.70891	0.095109	0.447143	0.267663	84.01
1	775	7.43335	5.06847	0.0756512	0.38216	0.233951	75.393
1	742	17.3806	5.37768	0.0724299	0.389463	0.233192	82.2026
1	842.333	39.1822	4.8301	0.0822239	0.395856	0.260295	69.9772
1	739.333	12.8614	5.39606	0.0721696	0.384333	0.232188	78.8322
1	695	13.5512	5.88917	0.067842	0.398671	0.217975	65.3055
1	693	8.58227	5.33385	0.0676468	0.359339	0.226048	87.137
1	839.333	10.2972	4.95907	0.081931	0.406361	0.246146	80.4303
1	908	10.8261	4.89067	0.0886339	0.430959	0.254573	81.6488
1	799.667	29.5102	5.26107	0.078059	0.409089	0.236948	72.7079
1	696.667	19.24	5.48308	0.0680047	0.372044	0.24387	56.3836
1	792	15.373	4.91662	0.0773106	0.379269	0.240383	50.1758
1	968	7.86096	4.51758	0.0944907	0.426906	0.269036	79.7546
1	939	21.5269	4.78609	0.0916599	0.437691	0.257028	69.0035
1	801.667	11.4131	5.14916	0.0782542	0.4025	0.228041	77.6014
1	852.333	14.8774	5.2185	0.0832	0.431787	0.233524	73.6759
1	928.333	15.8314	4.77419	0.0906187	0.432316	0.258453	84.1164
1	762.333	39.6668	5.51406	0.0744147	0.410858	0.247463	85.249
1	966.333	12.1442	4.48954	0.094328	0.421178	0.268929	85.1128
1	782.667	19.4505	5.37572	0.0763995	0.410444	0.238938	69.0194
1	735	25.0924	5.17443	0.0717466	0.369073	0.224545	72.1131
1	741	6.59303	4.9742	0.0723323	0.358949	0.245925	64.8162
1	708	21.5298	5.53251	0.069111	0.38029	0.226066	85.5483
1	790.667	11.5572	4.86496	0.0771805	0.373783	0.255584	61.1307
1	857.333	14.9934	4.94076	0.0836881	0.413596	0.265965	74.5521
1	951.667	13.4705	4.84095	0.0928964	0.448851	0.264273	75.8713
1	697.667	8.2296	5.14993	0.0681023	0.348154	0.22736	71.3146
1	874	9.26212	4.95708	0.085315	0.419947	0.245258	69.4377
1	882.333	12.7398	4.60243	0.0861284	0.392831	0.259101	71.7573
1	858.333	7.54774	5.03379	0.0837857	0.420707	0.259886	73.9615
1	693	16.8193	5.16917	0.0676468	0.348694	0.233381	70.3453
1	794	4.17289	4.96934	0.0775058	0.383456	0.236451	74.0026
1	725.333	15.0139	5.1155	0.070803	0.36153	0.232775	70.4954
1	758	18.2141	5.59692	0.0739917	0.413559	0.233402	82.7383
1	870.667	10.5773	4.90263	0.0849896	0.415833	0.265293	62.0963
1	886.333	21.0282	4.91018	0.0865189	0.42404	0.25362	60.4738
1	887.667	11.3828	4.73763	0.086649	0.409888	0.256737	81.297
1	966.333	12.1263	4.72596	0.094328	0.44504	0.268424	67.6703
1	829.667	10.7523	5.38014	0.0809874	0.434747	0.266812	79.1936
1	953	12.6062	4.73215	0.0930265	0.438213	0.254903	66.4531
1	1010.33	22.2063	4.72983	0.0986231	0.465463	0.27626	60.8967
1	810.667	11.7181	5.49108	0.0791327	0.433608	0.232303	84.0699
1	700	35.8905	5.49255	0.0683301	0.375555	0.226359	66.8387
1	827.667	22.0908	5.15423	0.0807922	0.413654	0.23864	80.0237
1	706.667	14.3436	5.19415	0.0689808	0.357264	0.239085	67.2885
1	921.333	23.3127	4.53962	0.0899354	0.407056	0.260558	77.1772
1	791.333	6.61025	5.26138	0.0772455	0.403565	0.24665	67.7124
1	1002.67	17.5708	4.77184	0.0978747	0.467004	0.261189	70.4143
1	800.667	27.1016	4.99246	0.0781566	0.387395	0.253648	82.9693
1	896	32.261	5.468	0.0874625	0.474498	0.281116	70.9107
1	836.667	13.3655	4.75412	0.0816707	0.387095	0.240673	69.2197
1	728.333	10.9689	5.0331	0.0710958	0.357013	0.239113	80.6419
1	852	44.9438	5.12366	0.0831675	0.4238	0.248256	77.0245
1	843.333	14.2174	5.16973	0.0823215	0.421558	0.235516	76.274
1	739.333	12.1697	6.27302	0.0721696	0.449144	0.244042	87.3117
1	1071.33	16.3515	4.57687	0.104578	0.478663	0.263591	77.6413
1	962.333	13.3216	4.7186	0.0939376	0.442355	0.249554	79.3932
1	915	13.3172	4.89216	0.0893172	0.435747	0.270306	75.5787
1	772.667	11.5077	4.9218	0.0754234	0.370989	0.25349	84.4813
1	867	12.5195	4.73658	0.0846317	0.397393	0.260424	64.3999
1	924.333	9.07963	4.90009	0.0902282	0.437305	0.267004	65.4083
1	878	14.6703	4.94739	0.0857054	0.422884	0.265876	64.2233
1	968	34.1078	5.05435	0.0944907	0.471997	0.276107	70.3133
1	819.333	14.6787	5.24984	0.0799787	0.417696	0.240462	71.8256
1	766.333	11.4966	5.35686	0.0748052	0.39993	0.245859	62.8229
1	780.333	24.2259	5.66504	0.0761718	0.42098	0.233831	72.5009
1	774.667	7.3839	5.19251	0.0756186	0.390307	0.23231	67.5458
1	972	15.6914	4.78637	0.0948812	0.452937	0.269513	65.8348
1	816.667	27.0549	5.12398	0.0797184	0.404217	0.250499	59.0367
1	988.667	9.80282	4.64309	0.0965081	0.445619	0.250628	80.034
1	855	26.8345	5.30482	0.0834603	0.439011	0.224307	83.29
1	838.667	9.26015	4.80932	0.0818659	0.392304	0.252544	60.5982
1	764.667	11.6445	5.17371	0.0746425	0.384533	0.236114	77.0531
1	960	9.95356	4.5071	0.0937098	0.421504	0.272198	68.9591
1	748	34.5003	5.63142	0.0730156	0.408962	0.229875	74.0236
1	856.667	13.8316	4.67411	0.083623	0.388994	0.253414	54.4451
1	828.667	23.6766	5.0788	0.0808898	0.409635	0.24459	78.3544
1	713	17.1724	5.91357	0.0695991	0.406335	0.227761	74.0206
1	935.667	6.02139	4.54339	0.0913345	0.413054	0.262971	79.99
1	840	14.6705	5.26904	0.0819961	0.431851	0.251302	49.3468
1	709	6.4012	5.81914	0.0692086	0.399392	0.240259	72.0599
1	921.333	11.8167	4.55719	0.0899354	0.408591	0.25383	78.1259
1	628.333	15.2964	5.72134	0.0613344	0.350987	0.219387	71.5378
1	902.333	30.1617	5.12306	0.0880807	0.450778	0.247118	72.5028
1	902	11.6913	5.06712	0.0880482	0.446049	0.264779	78.5673
1	834.667	10.0425	4.89477	0.0814755	0.398431	0.251341	74.8944
1	860.667	12.0603	4.88702	0.0840135	0.40874	0.254842	81.4784
1	746	9.12649	4.87811	0.0728203	0.354579	0.237416	80.2451
1	784.667	4.86264	5.1251	0.0765948	0.3914	0.244509	68.6959
1	810.667	11.2636	5.32687	0.0791327	0.416624	0.245301	81.7691
1	771.333	9.86549	5.09135	0.0752932	0.381683	0.258315	67.6364
1	919.333	16.0715	4.7319	0.0897402	0.422192	0.259173	82.2152
1	815.667	34.6072	5.26213	0.0796208	0.41738	0.251705	59.0443
1	889.333	16.1358	5.10695	0.0868117	0.428065	0.236423	79.9751
1	993.333	16.651	4.87927	0.0969636	0.466615	0.26478	83.8383
1	735.333	33.8824	5.53744	0.0717791	0.393172	0.233698	86.3016
1	1030.33	15.5119	4.56407	0.100575	0.456755	0.267029	78.9523
1	643.333	6.66251	5.42781	0.0627986	0.337885	0.218547	68.4948
1	825	12.3598	5.36212	0.0805319	0.428533	0.254083	69.4798
1	932.333	13.9017	4.76903	0.0910092	0.431117	0.260705	65.1331
1	684.667	9.39027	5.64248	0.0668333	0.377244	0.22632	65.5584
1	751	22.3806	4.87262	0.0733084	0.355109	0.242751	72.5013
1	749	8.14694	4.92609	0.0731132	0.359276	0.254173	75.6143
1	982	13.8791	4.60963	0.0958573	0.439927	0.267974	74.9411
1	843	26.5183	5.09651	0.0822889	0.418788	0.26108	72.0356
1	836.667	13.0624	5.17234	0.0816707	0.421164	0.251417	70.6678
1	858.333	25.9357	4.99964	0.0837857	0.416914	0.247364	62.8737
1	816	16.69	5.31291	0.0796534	0.42013	0.23317	83.415
1	764.333	15.5827	5.08534	0.0746099	0.378837	0.236825	85.0172
1	1021.67	22.8243	4.74163	0.0997294	0.472885	0.278157	78.206
1	756.667	8.47544	5.44321	0.0738616	0.40086	0.220576	69.3199
1	955.333	22.7585	4.85939	0.0932543	0.450695	0.270288	70.7854
1	741.667	14.1029	5.4855	0.0723973	0.394596	0.241573	71.2647
1	841	24.8238	5.11106	0.0820937	0.417333	0.244754	81.6977
1	917.667	33.5737	5.09034	0.0895775	0.45391	0.247416	68.4868
1	666.667	18.4994	5.97397	0.0650763	0.386072	0.229355	71.9684
1	673.667	11.2816	5.73185	0.0657596	0.37675	0.209261	73.8139
1	797.333	21.9476	5.67109	0.0778312	0.438317	0.25806	82.3394
1	814	14.5794	4.92108	0.0794581	0.389012	0.256694	74.9051
1	777.333	29.3238	5.42982	0.0758789	0.406188	0.243707	71.2276
1	990.333	15.3342	4.6844	0.0966708	0.452052	0.267047	85.655
1	823	18.5645	5.12353	0.0803367	0.410854	0.25107	75.0396
1	964.667	16.305	4.85348	0.0941654	0.453258	0.282156	83.8093
1	829.333	13.3609	5.12612	0.0809549	0.413871	0.256019	79.4433
1	948.333	9.0796	4.96645	0.092571	0.455763	0.26794	85.8973
1	917.333	15.7037	4.81509	0.0895449	0.430681	0.267976	73.0704
1	801.667	9.48165	4.90481	0.0782542	0.382616	0.24507	72.112
1	980.333	39.3741	4.77503	0.0956947	0.456164	0.276603	61.3427
1	860.667	10.8388	4.87566	0.0840135	0.40917	0.255613	81.9065
1	877.667	11.4022	5.27988	0.0856729	0.450012	0.235799	78.8688
1	968.333	15.1781	4.76139	0.0945233	0.449325	0.258836	70.8659
1	1006.33	21.0282	4.86317	0.0982326	0.477579	0.269417	77.9527
1	906.333	11.4875	4.65033	0.0884712	0.409785	0.251171	72.1574
1	775	14.4462	5.20437	0.0756512	0.389549	0.266339	68.4774
1	879.667	7.73138	4.85997	0.0858681	0.417161	0.258526	71.8749
1	822.333	17.3304	5.44707	0.0802716	0.436183	0.263637	67.7485
1	795	11.9566	5.21514	0.0776034	0.40367	0.245724	79.8457
1	713.333	28.6111	5.3146	0.0696316	0.368727	0.230665	69.1576
1	959.333	20.5667	4.95401	0.0936447	0.458082	0.264514	60.3352
1	720.333	8.88809	5.12054	0.0703149	0.359361	0.230605	61.8326
1	839.667	12.9189	4.93307	0.0819636	0.402335	0.256142	63.3606
1	967.667	14.3808	4.62124	0.0944582	0.43454	0.257801	85.1742
1	786	7.72757	4.94309	0.0767249	0.376441	0.240435	80.5751
1	962	18.3643	4.96373	0.0939051	0.464239	0.26282	66.9927
1	744	20.6034	5.46788	0.0726251	0.391081	0.233327	82.4971
1	671.333	12.2811	5.64161	0.0655318	0.368705	0.216015	75.4952
1	754.333	36.9202	5.76859	0.0736338	0.425153	0.225147	71.0452
1	1065.33	12.3241	4.57705	0.103992	0.474098	0.277191	79.5167
1	763.667	12.3615	5.60959	0.0745449	0.415951	0.225752	78.983
1	684	12.5848	5.64344	0.0667682	0.37565	0.222429	79.3902
1	663.333	31.4472	5.6748	0.0647509	0.366991	0.250038	81.5124
1	887.333	13.7798	5.00674	0.0866165	0.430132	0.257062	66.4455
1	867.667	24.2432	4.66585	0.0846968	0.394683	0.284179	68.1088
1	962	12.1901	4.49132	0.0939051	0.419129	0.282423	65.154
1	887.333	13.1113	4.73295	0.0866165	0.40961	0.264498	64.042
1	788	22.3736	5.17196	0.0769201	0.39444	0.239761	76.4999
1	824.333	6.13969	4.79491	0.0804668	0.38555	0.247546	76.4636
1	754	31.808	5.72559	0.0736013	0.420059	0.237637	82.2218
1	882	9.2343	5.06038	0.0860959	0.426374	0.267405	74.6951
1	851.333	10.7123	4.95731	0.0831024	0.411668	0.239485	81.8013
1	878.333	13.8717	5.03385	0.085738	0.429668	0.238965	74.7779
1	786.333	10.3584	5.3106	0.0767575	0.406528	0.235165	76.0742
1	961.333	10.2957	4.73061	0.09384	0.442572	0.272459	72.4052
1	863	23.9124	5.2605	0.0842412	0.442934	0.25889	80.0079
1	818.667	10.8948	5.19108	0.0799137	0.411847	0.241833	77.5104
1	730	46.2581	5.42996	0.0712585	0.38568	0.251853	62.7167
1	948	29.8832	5.15377	0.0925385	0.474945	0.250385	80.8477
1	709.667	37.6509	5.99458	0.0692737	0.415449	0.226015	82.9459
1	767.667	11.638	5.09886	0.0749353	0.379179	0.237192	75.513
1	821.333	9.26237	5.62651	0.080174	0.446448	0.249968	77.9473
1	920.333	34.4841	4.87523	0.0898378	0.437279	0.246681	81.258
1	849.333	11.8169	4.87174	0.0829072	0.398489	0.266724	80.9872
1	1063.33	10.9125	4.39471	0.103797	0.455326	0.277859	73.4841
1	1102.33	13.2148	4.24574	0.107604	0.45588	0.270083	77.4243
1	758.333	13.468	5.58938	0.0740243	0.41367	0.22764	85.8201
1	956	11.9335	4.72992	0.0933194	0.439735	0.277028	76.4041
1	771.667	25.2371	5.51921	0.0753258	0.413623	0.239526	78.7631
1	729.333	9.10028	5.24033	0.0711934	0.371939	0.227725	84.7655
1	673.333	23.1457	5.39075	0.065727	0.353567	0.223116	55.9796
1	801.667	11.5281	5.32236	0.0782542	0.409622	0.251616	80.169
1	885	7.03044	4.76929	0.0863887	0.410187	0.253822	75.1597
1	954.333	17.305	5.24114	0.0931567	0.487693	0.239096	82.5787
1	721	14.7997	5.2801	0.07038	0.370943	0.226671	68.029
1	842.333	19.7286	5.19949	0.0822239	0.424365	0.244936	81.4248
1	905.333	19.6722	5.2706	0.0883736	0.465612	0.267987	76.1387
1	819.333	21.7644	5.03631	0.0799787	0.40136	0.239682	72.404
1	783	23.2692	5.55407	0.0764321	0.42369	0.236029	67.609
1	884.667	30.1914	4.94682	0.0863562	0.426848	0.248489	81.6974
1	753.333	10.0907	5.48949	0.0735362	0.400613	0.228361	81.3089
1	919.333	17.6082	4.76143	0.0897402	0.42676	0.255925	66.9778
1	900.667	9.73223	4.91118	0.087918	0.431135	0.258129	81.4204
1	866.333	20.3755	4.72443	0.0845666	0.398986	0.252461	62.2344
1	833.333	17.983	5.19952	0.0813453	0.41776	0.243206	78.348
1	838.333	19.9112	4.91282	0.0818334	0.401536	0.245844	75.9057
1	1010	18.369	4.6682	0.0985905	0.457254	0.264788	81.3563
1	832.667	27.8752	4.96505	0.0812803	0.40256	0.238637	76.5514
1	792.333	12.7652	5.51901	0.0773431	0.425901	0.263269	55.969
1	769.667	8.72484	5.45485	0.0751305	0.408996	0.234893	82.3001
1	743.333	14.9749	5.06865	0.07256	0.366164	0.23552	73.4989
1	980	10.4487	4.74201	0.0956621	0.449544	0.272102	73.435
1	966.333	11.711	4.62326	0.094328	0.434117	0.27184	65.2438
1	1009	13.2916	4.65311	0.0984929	0.456808	0.266151	73.7613
1	657.333	11.5207	5.75876	0.0641652	0.364046	0.230796	69.7753
1	759.667	17.1078	5.54251	0.0741544	0.410211	0.237829	77.5053
1	768.333	11.0562	5.10743	0.0750004	0.382268	0.238447	69.8957
1	909.333	7.56097	5.21097	0.088764	0.456937	0.266568	82.1295
1	776	8.27558	5.00583	0.0757488	0.377964	0.243768	62.9621
1	721.667	5.58092	5.44579	0.0704451	0.383904	0.24764	82.4109
1	862	16.1991	4.90009	0.0841436	0.411237	0.261914	59.8026
1	943	10.7339	4.79153	0.0920504	0.440871	0.263702	81.7349
1	774	7.82958	5.22642	0.0755535	0.394351	0.247347	70.7057
1	917.667	9.65002	4.84517	0.0895775	0.433514	0.261444	65.9192
1	812.667	18.7841	4.94851	0.079328	0.390728	0.246485	77.1317
1	810.667	15.8766	5.26818	0.0791327	0.415179	0.236558	81.9718
1	716	16.3306	4.90372	0.0698919	0.341442	0.238363	67.9418
1	954.333	24.6321	4.57742	0.0931567	0.423374	0.259415	71.305
1	923	20.376	4.78672	0.0900981	0.429078	0.256042	60.2931
1	799	26.925	5.64414	0.0779939	0.426229	0.257851	69.6121
1	881.333	22.6223	5.10691	0.0860308	0.437739	0.268556	69.1907
1	952	11.8762	4.76094	0.0929289	0.442209	0.271719	65.3437
1	826.333	10.7792	4.86236	0.080662	0.391866	0.250811	77.1302
1	591.667	45.4241	6.83859	0.0577552	0.40029	0.191016	82.8649
1	787.667	14.0727	4.90681	0.0768876	0.376906	0.23854	82.9829
1	894	10.7846	4.64451	0.0872673	0.403515	0.25959	74.5663
1	633.333	5.20859	5.01061	0.0618225	0.308363	0.254397	71.587
1	701.333	23.0366	5.44175	0.0684602	0.371624	0.226519	60.4488
1	725	6.84941	5.37228	0.0707704	0.38014	0.256372	65.29
1	966.333	12.5476	4.61451	0.094328	0.434274	0.258728	77.9294
1	1118.67	59.3422	4.72311	0.109198	0.512889	0.272832	71.6613
1	873.667	16.8388	5.19526	0.0852824	0.442859	0.256158	82.7141
1	743	21.8678	5.39487	0.0725275	0.388338	0.233936	84.2643
1	935	19.7016	4.7429	0.0912695	0.431549	0.260436	74.9082
1	758.333	20.6187	5.2976	0.0740243	0.391596	0.241291	77.0214
1	859	30.0818	5.32064	0.0838508	0.44236	0.241741	55.4625
1	799.667	34.933	4.92105	0.078059	0.38341	0.291285	60.1605
1	810.333	33.0808	5.22902	0.0791002	0.412773	0.239864	68.6009
1	764.333	48.1079	5.55688	0.0746099	0.412278	0.233406	75.1732
1	718.333	16.6138	5.24606	0.0701197	0.364932	0.260146	79.8854
1	779.667	15.0187	5.15176	0.0761067	0.390513	0.242515	74.2017
1	954.333	29.6478	4.97702	0.0931567	0.461721	0.270925	79.8221
1	942.667	19.4382	4.7941	0.0920178	0.441051	0.266968	71.6543
1	694.333	11.161	5.11043	0.0677769	0.345988	0.248805	65.0921
1	768	17.9018	5.25696	0.0749679	0.392135	0.233428	75.5618
1	949.333	29.5672	4.84195	0.0926686	0.446929	0.27237	76.2578
1	825.667	7.97354	5.04788	0.080597	0.406359	0.250606	82.705
1	801.667	8.1321	5.32409	0.0782542	0.415278	0.231362	78.7685
1	864.333	13.2318	4.89603	0.0843714	0.410436	0.258579	85.0651
1	758.667	9.88196	5.16289	0.0740568	0.380718	0.247075	84.7814
1	777.667	16.4986	5.19896	0.0759115	0.394281	0.236064	67.7698
1	927	12.2527	4.52004	0.0904885	0.40732	0.268929	55.8492
1	951	16.3275	4.82063	0.0928313	0.44518	0.264288	59.6686
1	1010	13.9082	4.93964	0.0985905	0.484547	0.265878	84.3068
1	692.667	23.5465	5.56058	0.0676142	0.375737	0.238675	78.1776
1	944.333	6.88615	4.63093	0.0921805	0.426317	0.260095	68.7167
1	925.667	7.5907	4.88269	0.0903584	0.439329	0.264962	67.0605
1	796.333	42.1058	5.12775	0.0777336	0.397711	0.25476	61.3347
1	921.667	13.2392	4.59979	0.0899679	0.41289	0.263753	76.4446
1	799.667	40.5948	5.35772	0.078059	0.417793	0.243106	72.8534
1	861	17.4759	5.5206	0.084046	0.461193	0.225217	71.2888
1	917.333	16.3736	4.79151	0.0895449	0.428906	0.260598	69.039
1	1015	11.2106	4.67184	0.0990786	0.459651	0.265569	82.5055
1	885.333	9.22164	4.95224	0.0864213	0.426624	0.240029	63.1216
1	712.667	38.0993	5.08919	0.0695665	0.354015	0.253147	65.1288
1	848.333	13.5886	5.04389	0.0828095	0.4158	0.259288	83.0807
1	831	9.64618	4.94043	0.0811176	0.396507	0.266885	64.7298
1	821.667	21.0521	5.16463	0.0802065	0.413412	0.236283	68.9721
1	713	13.3726	5.25304	0.0695991	0.365376	0.233556	77.2212
1	972.667	18.3754	4.97922	0.0949463	0.472209	0.240192	71.4798
1	764.333	22.5167	5.75874	0.0746099	0.417947	0.260218	78.8141
1	911.333	22.7249	4.67918	0.0889593	0.413917	0.274051	67.1105
1	744	12.1587	5.36456	0.0726251	0.388481	0.239413	73.7664
1	1020.67	12.6018	4.67229	0.0996318	0.462753	0.263471	82.6421
1	851	13.9554	5.23822	0.0830699	0.434165	0.250893	68.4419
1	1012.33	18.7041	4.51661	0.0988183	0.445775	0.283557	80.1304
1	948.667	22.0772	4.8972	0.0926035	0.452257	0.252478	75.6996
1	782.667	6.30877	5.05214	0.0763995	0.381943	0.261383	84.0933
1	815.333	13.1109	4.88078	0.0795883	0.386769	0.247646	66.3951
1	776.667	17.3885	5.28966	0.0758139	0.398314	0.255486	52.7179
1	877.333	11.9165	5.18805	0.0856404	0.439255	0.266239	71.0307
1	785	22.7984	5.16745	0.0766273	0.395725	0.26526	67.2167
1	1101.33	19.2933	4.26048	0.107506	0.45811	0.302024	79.5694
1	1014.33	20.1202	4.5789	0.0990135	0.449862	0.27889	73.1198
1	964.333	14.5997	5.24001	0.0941328	0.49182	0.270533	77.3748
1	789.667	10.7938	4.98782	0.0770828	0.383702	0.245199	76.457
1	725.667	23.8304	5.55758	0.0708355	0.391513	0.244042	50.5368
1	835	16.0131	5.12534	0.081508	0.414888	0.249338	85.4332
1	930.667	19.5479	4.90558	0.0908465	0.444028	0.265119	69.291
1	805.667	14.738	5.43463	0.0786447	0.424158	0.2322	82.7367
1	731.667	18.042	5.88018	0.0714212	0.416024	0.231167	65.5566
1	859	12.0326	5.09056	0.0838508	0.425128	0.262321	59.6375
1	844.667	7.02465	4.75497	0.0824516	0.389442	0.24424	62.8303
1	956.333	13.1464	4.86943	0.0933519	0.453748	0.261407	73.0448
1	769	16.5922	5.15247	0.0750655	0.385098	0.237414	75.9678
1	744	26.6144	5.38725	0.0726251	0.389221	0.2411	77.1268
1	887.333	10.0727	5.12427	0.0866165	0.436515	0.259402	77.4671
1	886.333	20.469	5.02438	0.0865189	0.434597	0.246756	81.4315
1	630.333	5.99511	5.18578	0.0615296	0.31643	0.246931	70.9113
1	707	22.0576	6.44892	0.0690134	0.444048	0.211984	47.5262
1	800	15.1887	5.17714	0.0780915	0.403783	0.242806	67.2168
1	877.333	10.7802	5.02459	0.0856404	0.429164	0.262587	59.6292
1	943	6.52892	4.53646	0.0920504	0.417292	0.262738	69.9042
1	889.333	22.7685	5.17007	0.0868117	0.442302	0.270581	64.9306
1	949	32.4733	4.76964	0.0926361	0.439094	0.287254	73.0214
1	897.333	9.98274	4.84014	0.0875927	0.421912	0.24519	69.6785
1	789.333	35.5983	5.3259	0.0770503	0.407041	0.258228	74.2911
1	900	27.3761	4.87559	0.087853	0.42803	0.247957	79.2331
1	710	21.2037	5.65097	0.0693062	0.391083	0.228851	66.7859
1	723.333	18.1623	5.66527	0.0706077	0.39994	0.235027	76.4312
1	866.333	22.8594	5.09473	0.0845666	0.430085	0.276697	71.1902
1	767.667	14.3452	4.92606	0.0749353	0.369052	0.25707	76.407
1	884	30.2217	4.99966	0.0862911	0.429973	0.247072	63.2056
1	974.333	21.4637	5.05692	0.095109	0.474013	0.268305	77.2447
1	912.667	39.4446	5.07435	0.0890894	0.451994	0.261341	66.0736
1	888.667	13.2907	5.10175	0.0867467	0.44289	0.273161	69.8773
1	626	20.542	5.94627	0.0611066	0.363156	0.228269	74.3342
1	765.667	30.4212	5.32192	0.0747401	0.395655	0.253384	72.7211
1	722	9.35507	5.31646	0.0704776	0.372056	0.222042	83.7898
1	792.667	13.7481	5.03496	0.0773757	0.388488	0.254625	60.2551
1	865.667	15.1097	4.95155	0.0845015	0.415759	0.257002	79.8415
1	870.333	12.7348	5.02074	0.0849571	0.424138	0.258078	60.028
1	741	8.54038	5.6531	0.0723323	0.404205	0.25277	69.2151
1	809.333	15.3338	5.15599	0.0790026	0.401639	0.244608	77.5356
1	754	10.1918	5.49738	0.0736013	0.403282	0.240298	71.3931
1	1007	18.7413	4.53291	0.0982977	0.445064	0.263324	74.4576
1	761.667	11.3433	5.57603	0.0743496	0.413966	0.24795	78.7447
1	1086.33	11.1558	4.40424	0.106042	0.463987	0.277851	83.2991
1	1059.33	14.1381	4.59143	0.103406	0.473887	0.273987	72.613
1	1005.33	13.3461	4.66811	0.098135	0.458078	0.269674	72.5666
1	931	8.30667	4.60998	0.090879	0.417794	0.256644	83.2845
1	767.667	15.6602	5.36534	0.0749353	0.402889	0.231732	70.4478
1	838	23.8767	5.18447	0.0818009	0.422736	0.268487	57.2499
1	853.333	22.8581	5.07215	0.0832976	0.421131	0.250293	86.0344
1	926.667	18.4474	4.87955	0.090456	0.439004	0.242846	78.0676
1	840	6.56475	4.90597	0.0819961	0.401569	0.237419	79.0816
1	880	41.0843	4.94465	0.0859007	0.420978	0.260039	79.1089
1	581.333	8.95796	5.92908	0.0567465	0.331903	0.224069	66.6141
1	848	11.2687	4.73293	0.082777	0.392228	0.264706	73.0946
1	904	15.3	4.69003	0.0882434	0.41071	0.268833	61.4959
1	802.333	18.6275	5.42394	0.0783193	0.420145	0.237317	68.8489
1	640.333	11.6313	5.54912	0.0625058	0.344958	0.231383	86.492
1	993.667	20.7208	4.72639	0.0969962	0.457122	0.261963	73.8581
1	794.667	17.379	5.16022	0.0775709	0.40009	0.246045	64.3848
1	802.333	7.91542	4.98597	0.0783193	0.388453	0.25124	66.1457
1	770.667	13.1426	5.03704	0.0752282	0.377245	0.248007	65.7307
1	705.333	8.18873	5.70221	0.0688507	0.39245	0.239533	67.9293
1	816.333	9.66317	5.06997	0.0796859	0.401446	0.254895	75.0381
1	720.333	9.37935	5.31084	0.0703149	0.369811	0.230844	83.6719
1	790.333	19.4507	5.26392	0.0771479	0.405453	0.23269	74.5525
1	807	12.0053	4.77997	0.0787748	0.37474	0.24655	67.0537
1	794.333	9.83646	5.28263	0.0775384	0.409753	0.24812	75.6503
1	705.333	5.63617	5.26867	0.0688507	0.359716	0.218067	78.1317
1	871.667	9.55942	4.91694	0.0850872	0.416044	0.259323	69.8184
1	664.333	9.02383	5.01879	0.0648485	0.323162	0.243707	69.1025
1	847	16.6835	4.76835	0.0826794	0.394555	0.252922	73.089
1	676	23.0874	5.44014	0.0659873	0.358408	0.254226	73.8149
1	785	11.6293	4.99696	0.0766273	0.382787	0.236762	77.04
1	1024	11.3201	4.67364	0.0999571	0.464677	0.261004	76.9617
1	870	31.9157	5.11398	0.0849245	0.431619	0.244904	66.5927
1	959.333	14.5201	4.63291	0.0936447	0.429953	0.268823	77.555
1	785.333	38.6418	5.21153	0.0766598	0.397977	0.251341	57.8978
1	718	26.2475	5.38279	0.0700871	0.376373	0.245496	74.4185
1	851.667	12.1581	4.74183	0.0831349	0.393939	0.254812	75.1379
1	879	19.8045	4.97541	0.0858031	0.426534	0.260611	78.119
1	761.667	5.96829	5.35387	0.0743496	0.395128	0.241647	68.5397
1	765.667	22.8076	5.51537	0.0747401	0.4109	0.236868	70.2416
1	989.667	29.7903	4.89515	0.0966057	0.470826	0.263272	71.3738
1	747	13.2109	5.31754	0.072918	0.387143	0.227882	64.5807
1	698.667	7.93148	5.51752	0.0681999	0.375473	0.242872	53.3011
1	841	8.9731	5.15754	0.0820937	0.422981	0.250359	77.9828
1	733.667	7.92106	4.80473	0.0716164	0.343691	0.24397	72.4797
1	823.667	24.2833	4.97805	0.0804017	0.399816	0.256461	68.768
1	710.333	13.3429	5.9354	0.0693388	0.409396	0.221073	58.5552
1	701.667	11.8115	5.20161	0.0684928	0.35565	0.234376	69.58
1	831.333	29.847	4.98399	0.0811501	0.403757	0.253533	77.613
1	885.667	9.51785	4.86156	0.0864538	0.418987	0.234625	73.0507
1	942.333	12.3462	4.70987	0.0919853	0.431297	0.244838	55.6604
1	813.333	9.99285	4.80034	0.079393	0.380206	0.245108	75.8786
1	904.333	9.63882	5.0602	0.088276	0.442739	0.277262	71.9733
1	910.333	19.6917	4.52042	0.0888616	0.400911	0.280792	71.6796
1	937.333	29.9175	4.90689	0.0914972	0.448964	0.268826	60.5984
1	911.667	17.5356	4.88259	0.0889918	0.428515	0.254541	77.0933
1	872.667	12.3161	4.89244	0.0851848	0.414729	0.246988	72.1187
1	742.333	22.4524	5.39615	0.0724624	0.389502	0.223985	74.2401
1	894.333	25.1808	5.03608	0.0872998	0.439291	0.255756	78.9688
1	851.667	15.5641	4.91879	0.0831349	0.408852	0.259929	62.8635
1	707.667	29.6304	5.54391	0.0690785	0.379266	0.221621	76.7916
1	1058.67	37.0765	4.81637	0.103341	0.498049	0.280564	82.3399
1	979.667	13.0505	4.62524	0.0956296	0.441403	0.263601	77.7018
1	757	45.5931	5.61397	0.0738941	0.412328	0.239036	58.8201
1	976.667	25.9987	4.70425	0.0953367	0.44668	0.263306	76.611
1	813	32.5885	4.97668	0.0793605	0.392233	0.259917	58.1213
1	780	28.7129	5.09121	0.0761392	0.386099	0.230409	68.9626
1	851	43.8845	5.06816	0.0830699	0.420758	0.243993	63.4349
1	979.333	5.93235	4.31532	0.095597	0.412401	0.275759	71.8955
1	755.667	21.0835	5.25223	0.0737639	0.387414	0.249848	73.5291
1	806.667	6.24244	4.96625	0.0787423	0.390203	0.237487	74.2563
1	800.667	8.2673	5.18653	0.0781566	0.404469	0.261725	72.5943
1	797.333	21.1812	4.71521	0.0778312	0.365437	0.248417	67.7329
1	746	9.10334	5.67052	0.0728203	0.412651	0.23755	75.1843
1	959.333	9.47675	4.57667	0.0936447	0.427628	0.268913	77.1787
1	714.667	6.7831	5.03918	0.0697618	0.348852	0.239738	79.7226
1	750.333	31.0419	5.35113	0.0732433	0.39128	0.225038	59.3605
1	937.333	13.0658	4.99188	0.0914972	0.454628	0.258035	77.6183
1	837	16.8877	5.28625	0.0817033	0.429974	0.256016	72.9495
1	767.667	11.9227	4.82824	0.0749353	0.361037	0.242649	79.3212
1	755.667	6.57509	5.12292	0.0737639	0.378273	0.260022	72.8914
1	951.333	24.6568	4.6524	0.0928638	0.428586	0.265565	81.392
1	856	24.3534	5.28111	0.0835579	0.437213	0.237525	70.2434
1	793.667	11.8663	4.95812	0.0774733	0.379704	0.275129	76.2094
1	898	21.2204	5.11998	0.0876577	0.446073	0.258433	80.3843
1	829.333	60.2863	5.32882	0.0809549	0.42978	0.244041	62.104
1	736.333	27.7697	5.45547	0.0718767	0.391932	0.242168	69.6853
1	760	5.53321	5.05275	0.0741869	0.373347	0.246002	82.1662
1	1021.67	11.6592	4.6029	0.0997294	0.458908	0.278207	77.8214
1	1175.33	15.9683	4.46439	0.114729	0.511331	0.29001	79.2774
1	833.333	23.9241	5.022	0.0813453	0.40723	0.254271	73.8906
1	726.333	12.745	5.41112	0.0709006	0.383139	0.255027	73.6723
1	916.333	11.1026	5.05922	0.0894473	0.444089	0.268713	74.4687
1	948.333	16.5294	4.57473	0.092571	0.422822	0.260497	72.5683
1	862.667	25.4167	4.89455	0.0842087	0.411316	0.266896	70.2164
1	825	8.65343	4.99899	0.0805319	0.401295	0.245107	71.9111
1	939.333	16.2185	4.93528	0.0916925	0.451776	0.253773	83.641
1	948.667	7.70201	4.58744	0.0926035	0.42338	0.272232	54.2953
1	934.667	33.7688	4.9551	0.0912369	0.451015	0.259588	74.3309
1	807.333	47.3209	5.23868	0.0788074	0.411976	0.255413	53.7615
1	793.333	10.4537	5.24965	0.0774408	0.40551	0.251248	74.1442
1	857.333	16.33	4.76168	0.0836881	0.397511	0.261037	51.9964
1	1035	29.7851	4.76211	0.101031	0.478323	0.278597	62.0289
1	772.333	19.796	5.23989	0.0753909	0.392199	0.235147	69.8067
1	670.333	8.58595	5.30332	0.0654342	0.345661	0.230522	68.3357
1	963.667	24.7087	4.85629	0.0940677	0.455987	0.267031	78.3335
1	733.333	13.7009	5.73208	0.0715839	0.407965	0.225453	79.2235
1	951	8.557	4.82662	0.0928313	0.439857	0.284873	78.5041
1	890.333	10.1183	4.76097	0.0869094	0.413721	0.262669	77.7283
1	931.667	10.7405	4.55882	0.0909441	0.412881	0.249785	63.2974
1	865	21.1004	5.03489	0.0844365	0.422689	0.243319	59.214
1	825	42.3328	5.14025	0.0805319	0.412107	0.258101	78.8408
1	937	15.9131	4.72427	0.0914647	0.429707	0.257044	71.851
1	876.667	9.02133	4.82151	0.0855753	0.412153	0.266002	82.3266
1	879	12.2566	5.0185	0.0858031	0.430005	0.262064	76.305
1	707.667	33.2071	5.37488	0.0690785	0.370849	0.23185	68.3631
1	830.667	10.5081	4.68451	0.081085	0.377936	0.255604	85.8928
1	864.333	14.8692	4.6929	0.0843714	0.395734	0.257277	74.327
1	759	36.0947	5.7431	0.0740893	0.425364	0.241015	67.9029
1	930.333	16.3418	5.01996	0.0908139	0.44773	0.265524	79.742
1	836.333	8.99843	5.47783	0.0816382	0.445	0.236117	84.1865
1	779.333	18.5578	5.45312	0.0760742	0.412398	0.235439	77.0084
1	846.667	16.8129	4.90359	0.0826469	0.399809	0.253356	81.3995
1	951.333	16.826	4.80779	0.0928638	0.443359	0.257304	74.7005
1	860.333	18.8894	5.04099	0.0839809	0.420049	0.240039	70.5134
1	839.667	34.7593	4.9744	0.0819636	0.406066	0.256257	69.7411
1	903	19.5402	5.18913	0.0881458	0.455003	0.263249	77.4535
1	821.333	33.971	4.9909	0.080174	0.396853	0.251791	57.2758
1	705.667	39.6536	5.83568	0.0688832	0.397482	0.221319	68.777
1	919.667	39.2271	5.15651	0.0897727	0.458441	0.252214	78.918
1	857	34.9418	5.12286	0.0836555	0.427577	0.248592	72.7788
1	932	21.1122	5.04237	0.0909766	0.458385	0.256366	78.2444
1	942.333	34.4026	4.86783	0.0919853	0.44524	0.267425	74.0912
1	920.667	23.4539	4.90814	0.0898703	0.439846	0.264497	65.6878
1	771.333	16.9972	5.24294	0.0752932	0.392831	0.215657	85.9421
1	801	23.4359	5.50136	0.0781891	0.428317	0.245201	84.3338
1	781	10.3664	5.5687	0.0762368	0.423875	0.242948	62.244
1	839.333	24.8778	4.94482	0.081931	0.402688	0.249662	69.1391
1	748	10.1078	5.53773	0.0730156	0.403289	0.238771	53.1157
1	694	8.20483	5.45793	0.0677444	0.372534	0.234435	66.6986
1	814.333	10.1978	5.06181	0.0794907	0.399932	0.232387	67.4931
1	796.333	22.2887	5.14182	0.0777336	0.397422	0.235407	71.8216
1	924	27.4885	5.2297	0.0901957	0.467498	0.246736	78.1711
1	757	11.1899	5.20402	0.0738941	0.379679	0.24358	71.3812
1	633	14.3478	5.6766	0.0617899	0.348755	0.225085	53.3637
1	796	13.2515	4.95133	0.0777011	0.381752	0.231521	68.0843
1	869.667	13.0058	4.8484	0.084892	0.409715	0.258065	70.6831
1	953.667	14.1457	5.09589	0.0930916	0.468712	0.269046	79.8281
1	839.333	10.562	5.26192	0.081931	0.429928	0.249474	71.8755
1	766.333	23.8617	5.46243	0.0748052	0.403322	0.248945	62.0917
1	1102	21.571	4.70604	0.107571	0.503848	0.274101	81.577
1	1017	23.2005	4.62754	0.0992738	0.456952	0.290459	51.6346
1	806.667	11.1162	5.1284	0.0787423	0.403634	0.259668	66.9707
1	900	5.87313	4.82604	0.087853	0.423105	0.272976	82.1743
1	1048.33	13.1823	4.7139	0.102332	0.480785	0.260497	78.6537
1	858.333	21.1768	5.32319	0.0837857	0.44316	0.255844	77.8691
1	859.333	29.8971	4.81342	0.0838833	0.402273	0.253587	82.2452
1	920.333	33.5612	4.73496	0.0898378	0.424078	0.257363	76.5342
1	712	32.808	5.63536	0.0695015	0.391527	0.246808	55.0714
1	795.667	20.8737	5.23868	0.0776685	0.405851	0.251131	69.5206
1	907.333	10.5553	5.38159	0.0885688	0.473856	0.258058	73.715
1	763.667	31.4595	5.43863	0.0745449	0.404621	0.250365	67.6353
1	787.667	27.9762	5.3063	0.0768876	0.404214	0.232117	88.1382
1	832.667	36.6883	5.04189	0.0812803	0.406176	0.251861	58.0337
1	865	27.8112	5.32666	0.0844365	0.448532	0.273119	77.5801
1	885.333	20.447	5.02364	0.0864213	0.431497	0.245032	78.2551
1	839.333	40.8761	4.99056	0.081931	0.408785	0.248616	72.9076
1	1008.67	18.4075	4.6366	0.0984604	0.454039	0.269161	76.8499
1	735	8.30155	5.39882	0.0717466	0.383885	0.231817	80.8425
1	814.333	12.8974	5.28084	0.0794907	0.419869	0.230248	79.9186
1	786.667	16.3149	5.32034	0.07679	0.40456	0.271533	64.7042
1	818	43.5571	5.27182	0.0798486	0.416667	0.247334	68.2088
1	688.667	17.804	5.29593	0.0672238	0.354793	0.234391	70.2392
1	918.667	25.8953	4.98459	0.0896751	0.445224	0.253587	75.7833
1	752	10.0431	5.52754	0.073406	0.401474	0.249658	75.0123
1	742	8.02702	5.21121	0.0724299	0.377332	0.231624	67.99
1	823.667	20.0697	5.25381	0.0804017	0.418892	0.244266	78.2942
1	825	32.0567	5.30449	0.0805319	0.425839	0.24753	87.2043
1	874.667	21.2538	4.7686	0.0853801	0.406281	0.255248	70.6995
1	796	6.6807	5.10732	0.0777011	0.393732	0.243749	78.738
1	873.333	10.2769	4.66927	0.0852499	0.39592	0.256838	68.6621
1	652.667	13.1279	5.51924	0.0637097	0.3516	0.258009	79.2469
1	797.667	10.1485	5.52228	0.0778638	0.421819	0.239655	80.4919
1	687	12.9222	5.78812	0.0670611	0.387527	0.248518	72.3559
1	784.667	14.4826	5.20732	0.0765948	0.396735	0.238103	70.28
1	833.333	5.92033	5.10094	0.0813453	0.410025	0.268258	73.5477
1	858.333	13.3517	4.924	0.0837857	0.412384	0.255496	76.7633
1	694.667	11.348	5.52603	0.0678095	0.373664	0.226685	70.7624
1	624.667	23.0284	5.90577	0.0609765	0.358389	0.226271	66.515
1	960	11.5375	4.77931	0.0937098	0.444246	0.266501	74.753
1	875.333	18.6082	5.19595	0.0854451	0.443367	0.239841	73.2286
1	979	14.5864	4.8352	0.0955645	0.457578	0.274415	85.1433
1	927.667	11.0616	4.9864	0.0905536	0.45117	0.255669	76.9292
1	795.333	11.7051	5.31013	0.077636	0.407604	0.232975	71.0048
1	823	7.46793	5.3167	0.0803367	0.424714	0.23086	79.5155
1	1050.33	29.3177	4.6095	0.102528	0.470441	0.258767	75.6317
1	957	22.5567	4.99565	0.093417	0.462845	0.265496	59.4462
1	941.333	14.0822	4.83197	0.0918877	0.443711	0.26372	76.5239
1	1002.67	16.2209	4.37807	0.0978747	0.424224	0.282597	73.2804
1	979	6.56989	4.73141	0.0955645	0.451932	0.273503	83.9593
1	1046.33	20.3812	4.63254	0.102137	0.469651	0.269243	85.4828
1	841	22.6332	5.32997	0.0820937	0.431253	0.255775	72.8384
1	806.667	10.5674	5.31223	0.0787423	0.416955	0.247287	80.0569
1	793.333	8.8678	5.30679	0.0774408	0.410065	0.241559	76.1279
1	858	33.9364	4.95742	0.0837532	0.414674	0.255583	74.3675
1	940	27.6058	5.0148	0.0917575	0.454724	0.269734	76.5914
1	1011.33	13.7753	4.86034	0.0987207	0.473747	0.267579	71.6591
1	938	13.4887	5.10551	0.0915623	0.463709	0.250572	76.2637
1	708.333	30.3047	5.66227	0.0691435	0.390847	0.244824	57.8323
1	715.667	11.2965	5.32194	0.0698594	0.370309	0.214506	79.4596
1	742.333	8.73144	5.38106	0.0724624	0.389113	0.22706	79.1572
1	802.667	8.19608	5.07341	0.0783518	0.395772	0.249686	83.6406
1	962.333	16.2483	4.7997	0.0939376	0.446753	0.266516	82.2968
1	677	7.4674	5.60948	0.0660849	0.370241	0.220939	62.8125
1	1102	19.327	4.50911	0.107571	0.48353	0.29781	85.0407
1	732	12.8079	5.17627	0.0714537	0.367733	0.238029	62.3485
1	823.667	43.5557	4.85655	0.0804017	0.390167	0.251367	72.9058
1	841.667	40.4592	5.3344	0.0821588	0.436174	0.263258	73.8995
1	1075.67	14.563	4.4877	0.105001	0.471153	0.264965	81.7751
1	943	38.901	5.67362	0.0920504	0.521466	0.234273	75.3466
1	690.667	17.3753	5.25058	0.067419	0.353836	0.242948	67.684
1	995	17.1453	4.52166	0.0971263	0.438285	0.271048	74.8643
1	684.667	8.84133	5.23858	0.0668333	0.348	0.245388	66.6453
1	935	7.57576	4.72994	0.0912695	0.431566	0.257542	76.2712
1	779	6.82852	5.07043	0.0760416	0.385415	0.235267	80.4989
1	948.333	15.5539	5.0716	0.092571	0.466802	0.261651	75.756
1	930.333	10.2082	4.87774	0.0908139	0.437866	0.262091	77.0275
1	811	20.1184	4.83487	0.0791653	0.382221	0.253	76.5717
1	826.667	15.7445	5.1401	0.0806946	0.414325	0.243981	68.5855
1	999.667	52.7559	4.77243	0.0975819	0.464216	0.267731	64.9327
1	885.667	43.0037	5.07841	0.0864538	0.437529	0.257678	72.6747
1	747.667	5.36423	5.15588	0.072983	0.37458	0.254046	63.3831
1	1137.33	19.0314	4.7564	0.11102	0.527599	0.29599	85.1869
1	789.333	44.4685	5.16171	0.0770503	0.396474	0.249688	65.2699
1	810.667	19.81	5.38278	0.0791327	0.425939	0.236741	76.9773
1	689	7.92239	5.22004	0.0672563	0.351262	0.23668	79.378
1	768	10.452	5.52411	0.0749679	0.413801	0.246057	77.1965
1	780.667	10.6645	5.12973	0.0762043	0.38924	0.24402	61.9009
1	729	9.93279	5.22757	0.0711609	0.371745	0.231118	74.1463
1	824.333	27.5418	5.13835	0.0804668	0.412855	0.247252	69.7497
1	934	13.7823	4.94919	0.0911719	0.449418	0.265939	70.816
1	725.333	12.8467	5.37101	0.070803	0.376463	0.224123	78.4674
1	797	17.7735	5.40432	0.0777987	0.419358	0.237255	72.2553
1	720.667	14.8632	5.37252	0.0703474	0.375318	0.231515	66.0714
1	798.333	11.2218	4.61448	0.0779288	0.358593	0.261658	72.1739
1	934.667	10.1304	4.94107	0.0912369	0.45028	0.263511	78.3009
1	739.667	25.4519	5.41297	0.0722021	0.387	0.237409	75.3314
1	939.333	17.5968	4.91426	0.0916925	0.447364	0.257135	68.6853
1	895	15.5933	4.91364	0.0873649	0.425744	0.268399	72.5595
1	696	32.6754	5.66317	0.0679396	0.383379	0.226959	64.7502
1	798.333	10.308	5.11961	0.0779288	0.39867	0.232586	80.3974
1	847.667	13.2746	5.05041	0.0827445	0.413522	0.240103	82.0494
1	693.667	19.6587	5.63059	0.0677119	0.378584	0.240727	71.3372
1	880.333	7.79667	4.8618	0.0859332	0.416412	0.265493	72.7293
1	773	7.146	5.10254	0.0754559	0.383781	0.255311	69.2332
1	816.333	21.1979	5.13888	0.0796859	0.408509	0.252315	73.7318
1	782	11.7556	5.3635	0.0763345	0.405437	0.243993	72.2185
1	686	31.2863	5.76757	0.0669635	0.383503	0.227493	54.5439
1	861.333	16.5469	4.93208	0.0840785	0.414173	0.254114	85.1193
1	895.667	10.6281	4.83832	0.08743	0.42107	0.24403	69.8298
1	878.667	26.1916	5.02406	0.0857705	0.429596	0.257408	71.0118
1	750.667	21.6533	5.44287	0.0732759	0.399012	0.238692	79.0274
1	741.333	11.4693	5.32365	0.0723648	0.383512	0.230343	67.6165
1	697.333	15.3223	5.50528	0.0680698	0.374369	0.263373	57.0278
1	1029.33	14.0487	4.4164	0.100478	0.442879	0.29074	69.666
1	919.333	8.83179	4.84963	0.0897402	0.434792	0.265983	68.883
1	871	28.189	5.20876	0.0850221	0.441238	0.263481	65.9251
1	812.667	21.7003	4.63646	0.079328	0.367515	0.254594	66.4856
1	834.333	12.1896	5.14342	0.0814429	0.417604	0.247072	73.5042
1	678.333	16.4398	5.46333	0.0662151	0.360397	0.227182	73.2553
1	822.667	11.5477	5.14201	0.0803041	0.412041	0.244019	84.0959
1	952	12.7546	4.54035	0.0929289	0.418691	0.272522	77.4771
1	924	12.0863	4.93212	0.0901957	0.436709	0.262726	75.3142
1	985.667	9.07423	4.76097	0.0962153	0.45523	0.26676	80.3206
1	864.667	8.80557	5.13078	0.0844039	0.432782	0.261037	70.405
1	729	46.2623	5.6074	0.0711609	0.397552	0.246998	69.7884
1	930.333	10.9855	4.73641	0.0908139	0.429588	0.260767	52.9222
1	760.667	17.1734	5.1487	0.074252	0.381689	0.23488	63.5155
1	892	9.99385	4.81331	0.087072	0.41741	0.268853	85.3681
1	900.667	10.5258	4.9578	0.087918	0.435349	0.263729	73.8161
1	970	15.1492	4.75542	0.094686	0.449446	0.258926	75.0763
1	839.667	15.7737	5.0387	0.0819636	0.412289	0.261484	75.5612
1	997.333	15.9741	4.65905	0.0973541	0.450128	0.272283	69.7612
1	735	7.48179	5.28281	0.0717466	0.375077	0.249162	71.8303
1	884.667	8.02988	5.13139	0.0863562	0.44298	0.25745	72.1138
1	723	11.7386	5.37611	0.0705752	0.379292	0.246497	64.1532
1	952.333	10.2958	4.63611	0.0929614	0.429851	0.270672	68.8164
1	1041.67	13.3395	4.49126	0.101682	0.455107	0.26725	84.7693
1	687.667	19.6498	5.63516	0.0671262	0.377656	0.231594	64.2218
1	802	8.08877	4.89359	0.0782867	0.382835	0.26052	68.195
1	813	28.0216	4.81753	0.0793605	0.381319	0.26149	65.3206
1	692.333	8.70475	5.2713	0.0675817	0.355742	0.240652	85.3693
1	853.333	11.8875	5.17735	0.0832976	0.426993	0.251442	74.0834
1	750	6.31261	5.25471	0.0732108	0.382765	0.249081	71.2181
1	783.667	14.7283	5.33843	0.0764971	0.40771	0.23913	68.107
1	882.667	18.7624	5.59141	0.086161	0.475786	0.229688	81.9911
1	806	10.8414	5.11106	0.0786772	0.396935	0.241357	79.2552
1	870	11.0414	4.98915	0.0849245	0.423465	0.259832	70.072
1	878.667	12.6883	5.0096	0.0857705	0.421309	0.261247	77.0785
1	818.333	8.48979	5.25989	0.0798811	0.419434	0.258644	84.0348
1	620	32.4371	5.63444	0.0605209	0.339487	0.222689	74.0941
1	666.667	12.9693	5.57301	0.0650763	0.361953	0.251151	61.621
1	676	11.9356	5.62826	0.0659873	0.37114	0.220696	73.6854
1	882	16.1258	5.01956	0.0860959	0.431669	0.256254	65.7158
1	715.667	15.3382	5.26876	0.0698594	0.364051	0.242224	80.9459
1	708.667	16.9686	5.21509	0.0691761	0.358262	0.259171	71.989
1	849.667	7.06216	4.94847	0.0829397	0.410069	0.263103	75.8268
1	755.333	36.489	5.50846	0.0737314	0.404066	0.236579	85.2338
1	889.333	19.609	4.47924	0.0868117	0.388464	0.279704	83.3916
1	881	25.1204	4.8398	0.0859983	0.41432	0.257699	65.7883
1	865	10.4251	5.05543	0.0844365	0.425198	0.264907	76.4001
1	841	14.1352	4.83124	0.0820937	0.395128	0.244329	63.0393
1	740.333	18.4141	5.09927	0.0722672	0.36808	0.244621	66.5391
1	1070	7.54681	4.66261	0.104447	0.486448	0.274251	82.5778
1	903	8.24362	4.77026	0.0881458	0.419258	0.246789	64.4683
1	914.333	14.0164	4.78383	0.0892521	0.427107	0.249061	73.0715
1	938.333	14.1121	4.48542	0.0915948	0.40689	0.267013	54.5147
1	935.667	13.0303	4.72159	0.0913345	0.430401	0.274455	78.543
1	940.667	9.7269	4.66946	0.0918226	0.427283	0.255068	73.4877
1	800.333	16.2015	4.92728	0.0781241	0.384986	0.253223	72.0563
1	833.333	24.1892	4.74861	0.0813453	0.386022	0.268042	57.7516
1	950.333	7.69461	4.65369	0.0927662	0.430621	0.263169	61.9261
1	811	28.8992	5.23747	0.0791653	0.411623	0.247893	78.3664
1	811	11.3148	5.14489	0.0791653	0.402043	0.239533	75.7315
1	870.667	27.151	5.20161	0.0849896	0.437517	0.270541	71.7407
1	952	26.8923	4.72953	0.0929289	0.437497	0.258596	66.3027
1	860.333	14.686	4.77586	0.0839809	0.397315	0.254064	73.1297
1	1024.67	20.3665	4.80171	0.100022	0.479275	0.276589	71.1568
1	722.667	8.95316	5.23415	0.0705427	0.36812	0.216916	82.4324
1	818.667	20.5619	5.20893	0.0799137	0.415503	0.238485	74.239
1	903	21.2273	4.99359	0.0881458	0.439357	0.256218	63.7598
1	844.333	14.3652	5.00388	0.0824191	0.412376	0.251384	78.9238
1	777.667	27.0658	5.29822	0.0759115	0.401712	0.2503	83.5357
1	954	14.6219	4.90329	0.0931241	0.452636	0.251822	81.0948
1	832	10.4927	5.03564	0.0812152	0.408896	0.251834	82.7835
1	747	16.7847	5.10707	0.072918	0.369775	0.247542	64.2552
1	623.333	10.7086	5.65158	0.0608463	0.342695	0.225646	65.6209
1	946.333	10.2005	4.97442	0.0923758	0.453363	0.261875	71.7316
1	1006	16.557	4.7347	0.0982001	0.462005	0.265546	74.985
1	869	20.4987	4.96333	0.0848269	0.419769	0.244825	80.5502
1	770.667	39.9295	5.15767	0.0752282	0.388577	0.238083	43.8768
1	916	10.7545	4.79673	0.0894148	0.426875	0.263401	84.2042
1	963.333	10.3986	4.61421	0.0940352	0.43257	0.259734	83.8676
1	839.667	9.61841	4.77683	0.0819636	0.389704	0.245767	82.1925
1	727	28.4852	5.6382	0.0709657	0.400147	0.256604	58.082
1	724	7.7146	5.38889	0.0706728	0.375435	0.246144	86.9047
1	1001.67	18.4419	4.6836	0.0977771	0.45536	0.261087	82.5527
1	1027.67	16.2174	4.67047	0.100315	0.467287	0.25666	83.2962
1	954.667	23.3583	5.03171	0.0931892	0.46877	0.283569	71.4943
1	834.333	20.2658	5.16039	0.0814429	0.420212	0.242426	66.1843
1	786.333	29.4677	5.09181	0.0767575	0.388796	0.240965	62.3476
1	1054	19.0996	4.48304	0.102886	0.459479	0.273174	79.7823
1	756	25.3112	5.47498	0.0737965	0.399386	0.247349	66.9766
1	838	9.50215	4.92095	0.0818009	0.401955	0.244754	84.6935
1	897.667	22.0866	5.13976	0.0876252	0.440821	0.263222	65.2579
1	943.333	15.8843	4.72213	0.0920829	0.435439	0.289317	84.1287
1	699.667	5.43427	5.55133	0.0682975	0.37727	0.224311	83.683
1	931	9.34217	4.77758	0.090879	0.433218	0.25688	79.1547
1	860.667	23.3744	5.23373	0.0840135	0.439669	0.23722	74.1976
1	896.667	31.0258	5.27256	0.0875276	0.459705	0.261728	65.4305
1	834.667	6.2731	4.883	0.0814755	0.396403	0.268836	81.8848
1	801.667	7.52729	5.22652	0.0782542	0.404179	0.251836	77.4236
1	947	20.3917	4.49858	0.0924408	0.415196	0.270414	74.6064
1	602.333	12.3674	6.03151	0.0587964	0.352226	0.208814	77.7389
1	833.333	11.4526	5.29073	0.0813453	0.428273	0.238348	68.6691
1	1061	13.8077	4.61476	0.103569	0.473433	0.275314	86.2127
1	919.333	29.5942	5.07495	0.0897402	0.454512	0.25384	83.1264
1	865	19.7345	5.24801	0.0844365	0.4414	0.257667	77.9131
1	928	20.0162	4.46312	0.0905862	0.401845	0.260527	69.7616
1	743.667	26.3466	5.42529	0.0725926	0.391594	0.234113	72.9425
1	745.333	6.38078	5.4519	0.0727553	0.392596	0.250382	74.5015
1	924.333	8.53438	4.98289	0.0902282	0.448319	0.272744	72.1488
1	634.333	12.0356	5.17261	0.0619201	0.320458	0.24395	56.5818
1	956.333	14.2662	4.71681	0.0933519	0.440237	0.257027	77.6764
1	883	18.0336	5.26626	0.0861935	0.451694	0.266491	70.1523
1	739.667	9.93349	5.05401	0.0722021	0.363916	0.234926	79.0335
1	894.333	8.68293	4.87596	0.0872998	0.425339	0.269522	67.5673
1	857.333	8.54236	4.9357	0.0836881	0.412975	0.255177	78.4825
1	839.333	9.62088	5.20618	0.081931	0.425998	0.240413	84.2784
1	863.333	31.0953	5.29889	0.0842738	0.443436	0.26214	64.4578
1	777	17.6035	5.31102	0.0758464	0.400655	0.233858	68.4754
1	787	16.4338	5.42939	0.0768225	0.409828	0.244837	78.187
1	947.667	27.7053	4.8786	0.0925059	0.450652	0.260182	78.4286
1	916.667	12.8858	5.36634	0.0894799	0.477151	0.261387	83.2912
1	753	15.485	4.83264	0.0735036	0.355299	0.254093	67.2477
1	980.333	12.8295	4.769	0.0956947	0.455295	0.268209	85.1469
1	756.333	24.9395	5.14822	0.073829	0.376946	0.228386	59.5781
1	791	37.1076	5.38101	0.077213	0.413094	0.238436	71.2516
1	808.667	23.2918	5.02543	0.0789375	0.396046	0.24858	65.2283
1	1043	40.9525	4.67465	0.101812	0.474487	0.263535	70.5037
1	821.667	10.1214	5.3564	0.0802065	0.428732	0.240132	81.6813
1	751.333	12.8659	5.07349	0.073341	0.371234	0.23551	71.9717
1	802.333	26.4025	5.0311	0.0783193	0.392866	0.23688	83.4214
1	710.333	8.56726	5.31855	0.0693388	0.366385	0.24542	60.5913
1	912	15.374	4.82975	0.0890243	0.428907	0.261746	83.3398
1	932	14.7946	4.7459	0.0909766	0.43029	0.243803	71.0798
1	727.333	17.6511	5.26758	0.0709982	0.373704	0.241762	75.2459
1	750	31.1797	5.46929	0.0732108	0.399739	0.250517	60.003
1	827	7.61009	4.897	0.0807271	0.393873	0.247286	65.4206
1	800	6.84113	5.13964	0.0780915	0.397493	0.246528	78.8653
1	757	11.3027	5.12939	0.0738941	0.374852	0.235288	72.1828
1	954.667	22.1489	4.99282	0.0931892	0.463647	0.237943	78.7272
1	754	27.4932	5.8303	0.0736013	0.42615	0.247381	73.8688
1	742.333	20.8295	5.73361	0.0724624	0.408292	0.244249	78.2234
1	764.667	14.9049	5.18399	0.0746425	0.384574	0.249006	84.0044
1	841.333	10.7537	5.22659	0.0821262	0.429249	0.250886	88.2656
1	884.667	14.9532	4.88162	0.0863562	0.421429	0.255647	72.0915
1	745.667	26.5671	5.53647	0.0727878	0.401242	0.22687	73.8806
1	835.667	7.24711	5.00269	0.0815731	0.408086	0.26822	69.0984
1	854	21.7522	4.9849	0.0833627	0.415424	0.223519	82.6535
1	858.333	13.5588	4.96767	0.0837857	0.414609	0.237746	83.5575
1	751	21.3713	5.36534	0.0733084	0.392834	0.238257	63.8977
1	976	23.6141	4.73632	0.0952717	0.448636	0.255659	65.8279
1	607.333	7.4861	5.42561	0.0592845	0.319044	0.221705	57.7987
1	648.667	7.80211	5.41847	0.0633192	0.341671	0.223269	84.7266
1	755.333	23.4949	5.76538	0.0737314	0.424633	0.24506	72.3512
1	786.667	8.04662	5.03173	0.07679	0.385645	0.247591	78.5735
1	790.667	10.1988	5.10084	0.0771805	0.391643	0.258481	79.6158
1	796.333	11.4447	5.45396	0.0777336	0.422109	0.26827	58.2807
1	584	6.04367	6.01148	0.0570068	0.342216	0.211752	74.5703
1	922.333	13.9892	4.72447	0.090033	0.423449	0.269986	74.4625
1	979.333	31.2883	4.80061	0.095597	0.4548	0.285021	69.7709
1	813.667	12.6596	5.07345	0.0794256	0.401936	0.244961	68.8662
1	828	31.8926	5.03361	0.0808247	0.404797	0.247335	64.0969
1	738.333	7.39753	5.32713	0.072072	0.384235	0.246069	81.5553
1	817.333	8.68454	5.17521	0.0797835	0.411003	0.241748	77.8879
1	851.667	9.67195	4.98597	0.0831349	0.411931	0.244689	81.2498
1	903.333	14.9689	4.99206	0.0881783	0.437212	0.268995	74.1202
1	896.667	19.3334	5.33067	0.0875276	0.463867	0.255837	72.5154
1	824.333	13.4268	4.97987	0.0804668	0.398704	0.256055	80.5923
1	905.667	14.902	4.81544	0.0884061	0.41892	0.245258	78.4595
1	845	19.1892	4.75899	0.0824842	0.390379	0.238278	76.839
1	665	6.92781	5.73749	0.0649136	0.37252	0.252725	55.5817
1	1039.67	11.1498	4.48102	0.101486	0.453877	0.265676	71.1179
1	843.667	12.1943	4.53441	0.082354	0.372999	0.260945	51.2828
1	825.333	22.8301	5.04012	0.0805644	0.405841	0.250213	71.239
1	675.667	27.7215	5.47668	0.0659548	0.359918	0.241047	71.5854
1	872	10.6128	4.5874	0.0851198	0.389143	0.262664	76.9492
1	829.333	35.7714	5.2195	0.0809549	0.420388	0.247827	64.4946
1	1003.33	57.8696	4.9982	0.0979398	0.489388	0.259376	76.9555
1	774.667	24.5676	5.04072	0.0756186	0.379475	0.26074	68.57
1	940	9.68879	4.9632	0.0917575	0.454439	0.272209	80.9061
1	845.667	10.5371	5.05179	0.0825492	0.416112	0.263822	70.1703
1	774	41.2257	5.62156	0.0755535	0.424325	0.240662	64.4156
1	900.667	13.1338	4.98362	0.087918	0.437081	0.253035	58.9184
1	695.667	10.4214	5.62868	0.0679071	0.381617	0.236238	56.0316
1	823.333	10.2265	4.69794	0.0803692	0.378038	0.260152	75.8174
1	808.667	20.7396	5.00105	0.0789375	0.394673	0.260436	74.4314
1	980.667	10.4755	4.48587	0.0957272	0.426893	0.273236	80.9166
1	1084	18.9578	4.54211	0.105814	0.478771	0.27338	78.5442
1	860.333	14.0369	4.97026	0.0839809	0.414434	0.242794	87.8559
1	962	47.7546	5.09685	0.0939051	0.478648	0.256326	75.4531
1	968.333	15.6148	4.69542	0.0945233	0.442694	0.264253	78.6811
1	899	25.4067	5.13859	0.0877553	0.450534	0.261595	72.0284
1	801.333	20.431	5.62008	0.0782217	0.437905	0.26281	79.8062
1	791.667	8.36067	5.0178	0.0772781	0.386055	0.238617	71.7708
1	690.333	10.1745	5.54669	0.0673865	0.374292	0.24164	63.5233
1	939	21.5778	4.76909	0.0916599	0.436289	0.259786	78.7596
1	987.667	8.91494	4.64218	0.0964105	0.447497	0.269861	82.2418
1	1037.33	17.8642	4.67176	0.101259	0.468975	0.267569	76.2572
1	880	7.03382	4.95966	0.0859007	0.423343	0.258882	83.5599
1	750.667	7.53201	5.23727	0.0732759	0.384036	0.252888	73.3212
1	758.667	12.4151	5.27356	0.0740568	0.389485	0.238634	81.7102
1	919	45.951	5.08103	0.0897076	0.453065	0.250293	68.5367
1	781.667	8.22868	5.50707	0.0763019	0.417296	0.245439	84.8581
1	938	17.7418	4.77246	0.0915623	0.433924	0.251896	73.4198
1	850.667	5.82548	4.97354	0.0830373	0.41064	0.240413	70.155
1	961.333	16.8765	4.90571	0.09384	0.455908	0.282302	56.4944
1	802	12.2629	5.03341	0.0782867	0.39298	0.231913	78.7778
1	832.333	28.6297	5.15666	0.0812477	0.418601	0.265917	58.5706
1	825.333	6.65982	4.97911	0.0805644	0.400524	0.25688	74.3617
1	713	7.6503	5.22885	0.0695991	0.362922	0.239817	77.1145
1	796.667	19.0958	4.97125	0.0777661	0.384533	0.257784	75.2224
1	905.333	12.441	4.96564	0.0883736	0.438567	0.258764	80.8174
1	885	21.4687	5.00092	0.0863887	0.430912	0.24734	79.9557
1	791.333	10.5918	4.89297	0.0772455	0.377932	0.231275	72.418
1	917	27.9273	4.61336	0.0895124	0.411762	0.255633	72.4309
1	809.333	15.0677	4.95056	0.0790026	0.390354	0.250884	76.0276
1	853	18.9284	5.00792	0.0832651	0.41517	0.25514	68.174
1	898.333	8.58433	4.77176	0.0876903	0.417189	0.269351	67.2997
1	861	14.5618	4.78463	0.084046	0.399519	0.262733	50.2579
1	721.333	11.3432	5.52946	0.0704125	0.384335	0.236697	69.2756
1	697	8.1721	5.58538	0.0680372	0.376748	0.250226	67.7426
1	916	10.1459	4.8219	0.0894148	0.428513	0.2476	70.173
1	1012.67	19.2748	4.68325	0.0988509	0.458641	0.267055	75.0365
1	880.333	13.4159	5.00084	0.0859332	0.42751	0.244254	76.1721
1	933	18.1031	4.90345	0.0910742	0.445937	0.244868	85.2061
1	665	36.8229	5.30677	0.0649136	0.344214	0.237349	45.3858
1	815.333	22.4059	5.2449	0.0795883	0.416594	0.244865	77.5078
1	889.667	13.9079	5.05207	0.0868443	0.436958	0.243054	76.0837
1	969	26.8806	4.71034	0.0945884	0.443449	0.281407	73.3051
1	1068.67	18.4883	4.50803	0.104317	0.466041	0.278795	69.4846
1	774	14.9302	5.42737	0.0755535	0.408755	0.244245	81.424
1	806.667	10.148	4.78768	0.0787423	0.376112	0.24167	73.8184
1	782	12.9166	5.58452	0.0763345	0.425105	0.254135	74.3345
1	783.333	31.1287	5.66493	0.0764646	0.434631	0.23586	67.5541
1	855.333	25.6338	4.88475	0.0834929	0.407218	0.260559	68.6077
1	783.667	22.5515	5.53269	0.0764972	0.421896	0.230786	72.0919
1	995.667	11.2244	4.45345	0.0971914	0.431928	0.260597	63.2271
1	887	22.2215	5.02493	0.086584	0.434786	0.260863	78.4387
1	755	16.0121	5.34165	0.0736989	0.391047	0.227814	70.8235
1	962	18.5218	4.81797	0.0939051	0.450793	0.268373	79.2556
1	656.667	25.3606	5.72265	0.0641001	0.365297	0.23141	72.2686
1	807.333	14.8237	5.42689	0.0788074	0.421362	0.263059	72.8479
1	917	14.4515	5.21765	0.0895124	0.466034	0.267549	81.056
1	785.333	15.9031	5.36055	0.0766598	0.409234	0.252909	72.8853
1	761.333	11.875	5.08692	0.0743171	0.377504	0.250491	66.6627
1	977.667	9.16355	4.51558	0.0954343	0.42965	0.258759	61.3592
1	881	18.6838	5.07608	0.0859983	0.433291	0.255249	77.9125
1	947	26.8992	4.84461	0.0924408	0.4457	0.254388	78.5814
1	690	21.3471	5.29837	0.0673539	0.356629	0.232319	70.4756
1	972.333	11.9581	4.60203	0.0949137	0.436481	0.270297	84.137
1	933	10.6801	4.70375	0.0910742	0.427278	0.250087	75.7345
1	871.667	14.6885	4.71267	0.0850872	0.400489	0.272925	59.2416
1	1116.67	19.5933	4.50746	0.109003	0.487515	0.270704	81.1973
1	1030.67	20.5691	4.52106	0.100608	0.454694	0.289149	81.149
1	876.667	15.4797	4.96766	0.0855753	0.422093	0.249433	78.3403
1	1028.33	29.9633	4.62113	0.10038	0.46389	0.280768	82.5987
1	756.667	18.3535	5.29213	0.0738616	0.387046	0.240848	82.912
1	813.667	8.66645	5.06176	0.0794256	0.401074	0.253977	67.6263
1	807.333	12.1436	5.08896	0.0788074	0.399508	0.247096	67.0193
1	709.667	24.8614	5.91173	0.0692737	0.408526	0.22086	75.5492
1	942.333	12.5635	4.61411	0.0919853	0.422529	0.261155	63.8364
1	756.667	17.4843	5.255	0.0738616	0.389278	0.255079	81.7378
1	929.667	27.3282	4.87614	0.0907489	0.437152	0.262277	71.4236
1	981	12.8031	4.54099	0.0957597	0.434828	0.263602	72.3098
1	727.667	19.4135	5.49145	0.0710307	0.388687	0.232088	80.9605
1	856	24.4896	4.60446	0.0835579	0.38407	0.255974	68.3127
1	937	33.7777	4.71239	0.0914647	0.431426	0.266188	76.0275
1	809.333	7.1969	5.12068	0.0790026	0.40431	0.246372	76.162
1	893.333	14.8979	4.89745	0.0872022	0.426964	0.268342	64.3099
1	1040.33	51.0864	4.58371	0.101552	0.463876	0.28598	81.1507
1	626.333	9.80789	5.73153	0.0611392	0.344789	0.222155	63.464
1	753.333	11.8585	5.27504	0.0735362	0.384761	0.254148	71.1813
1	711.667	8.17634	5.19536	0.0694689	0.36025	0.226484	72.9274
1	772.333	16.9086	4.99547	0.0753909	0.374962	0.227824	78.3821
1	767.667	13.2051	5.41899	0.0749353	0.401421	0.238729	70.7005
1	722.333	12.6964	5.42015	0.0705101	0.381166	0.24124	86.8703
1	928.333	38.4476	4.83598	0.0906187	0.437318	0.264741	72.2683
1	812.667	6.95958	4.96084	0.079328	0.391594	0.250006	81.1409
1	787.667	8.20511	5.18269	0.0768876	0.398233	0.254276	70.9921
1	816	25.0877	4.56155	0.0796534	0.361958	0.26252	65.4071
1	999.333	17.8496	4.49715	0.0975493	0.437302	0.268438	75.8762
1	798.333	28.4569	4.93632	0.0779288	0.381958	0.246985	63.7968
1	897.333	14.1574	4.93845	0.0875927	0.429457	0.254702	80.7573
1	841	28.2465	4.99494	0.0820937	0.408539	0.252702	65.2552
1	756	11.3305	5.06277	0.0737965	0.372464	0.264921	49.1808
1	901	19.3694	4.59389	0.0879506	0.402176	0.263986	74.9082
1	1040	13.7582	4.46001	0.101519	0.451489	0.265299	81.3498
1	945.333	9.16138	4.58419	0.0922781	0.422189	0.266957	60.8721
1	677.667	7.69412	5.30499	0.06615	0.350296	0.242921	60.2539
1	1022.33	21.505	4.47237	0.0997945	0.444143	0.284131	72.6918
1	928.333	14.8667	4.8126	0.0906187	0.435871	0.254694	84.7875
1	710	18.5799	5.53568	0.0693062	0.379753	0.21847	75.2887
1	915.333	12.0963	4.90045	0.0893497	0.434919	0.243748	81.983
1	961.667	9.88872	4.60029	0.0938725	0.430986	0.269481	74.4846
1	868.667	12.48	5.16766	0.0847944	0.43813	0.249535	82.7251
1	755	22.6208	5.7341	0.0736989	0.4206	0.238901	62.6482
1	776.667	63.3177	5.37728	0.0758138	0.403749	0.247646	53.818
1	732	19.4312	5.23349	0.0714537	0.373892	0.262135	71.4204
1	690	16.029	5.53332	0.0673539	0.36763	0.236394	76.6449
1	884.667	42.286	5.18283	0.0863562	0.439004	0.253336	70.8105
1	875.333	9.89618	4.99107	0.0854451	0.423217	0.247547	85.323
1	964	11.6131	4.73083	0.0941003	0.444834	0.273347	66.6053
1	823.333	25.8451	5.2246	0.0803692	0.415387	0.248561	63.7325
1	801	7.51422	5.07959	0.0781891	0.395759	0.241424	71.7837
1	853.667	28.4329	4.81628	0.0833302	0.398949	0.25055	72.9377
1	858.667	13.7709	4.59753	0.0838182	0.385351	0.258171	64.345
1	956	27.5004	4.7387	0.0933194	0.442207	0.259049	78.9307
1	889.333	35.2897	5.14145	0.0868117	0.445373	0.256628	80.4365
1	823	10.5729	5.06517	0.0803367	0.402458	0.263385	58.1365
1	1027	35.1619	4.69053	0.10025	0.469954	0.26983	71.8556
1	864.333	15.9596	5.04656	0.0843714	0.423904	0.237659	76.7909
1	893.333	19.6023	4.85167	0.0872022	0.423054	0.252856	75.51
1	641	13.4979	5.6733	0.0625708	0.350895	0.231095	68.187
1	663.667	8.45501	5.4752	0.0647834	0.354359	0.230369	58.9308
1	707.667	17.3557	5.27017	0.0690785	0.363083	0.251928	58.6137
1	1091	38.732	4.73451	0.106497	0.50416	0.281419	69.0474
1	815.667	12.2466	5.06143	0.0796208	0.40182	0.246045	81.7933
1	848.333	16.1969	5.31954	0.0828096	0.435429	0.250962	76.8276
1	993	43.9294	4.7974	0.0969311	0.464409	0.263467	81.2315
1	921.333	10.9231	4.92834	0.0899354	0.440615	0.256563	88.3518
1	898	7.79371	4.9027	0.0876577	0.424693	0.268778	80.5247
1	711	46.2554	6.08635	0.0694038	0.415996	0.242163	63.5397
1	836.667	12.8453	4.78354	0.0816707	0.389413	0.236117	69.5826
1	960.333	11.1205	5.15952	0.0937424	0.481982	0.25327	82.7802
1	847	9.02292	5.0865	0.0826794	0.419617	0.26433	64.7621
1	884	12.5236	5.11889	0.0862911	0.440323	0.258025	80.8897
1	807.667	10.0386	5.56559	0.0788399	0.438664	0.244229	83.6196
1	779.667	28.8386	5.15658	0.0761067	0.390966	0.239249	68.8414

## Sheet: Col_nAT_B
Predicate	Pixel count	SSE	LS Ratio	Surface	Length	Width	Axes angle
1	852	13.5819	5.22583	0.0831675	0.434213	0.237148	66.6589
1	748.333	33.9336	5.39616	0.0730481	0.393096	0.216729	74.4746
1	609.667	15.4267	6.48423	0.0595122	0.379665	0.196896	83.7302
1	740	22.0147	5.49758	0.0722347	0.393686	0.223736	66.5127
1	872	30.3445	5.16936	0.0851198	0.437119	0.234824	57.201
1	796.667	14.1322	5.27072	0.0777661	0.406476	0.239524	79.3967
1	620.333	26.0637	5.88497	0.0605535	0.352422	0.215766	72.8127
1	844.667	28.9573	5.75857	0.0824516	0.465418	0.257136	72.1834
1	747.667	15.0415	5.33335	0.072983	0.387505	0.236737	69.8462
1	778.667	11.7155	5.38786	0.0760091	0.409283	0.234957	82.5229
1	662.333	38.3716	5.80534	0.0646533	0.373682	0.215622	69.345
1	737	11.386	5.31486	0.0719418	0.379882	0.230786	83.1609
1	794	32.6554	5.39674	0.0775058	0.416244	0.225372	74.3434
1	793	17.0703	5.35377	0.0774082	0.411008	0.216085	80.3346
1	806	7.92576	5.42153	0.0786772	0.42403	0.235929	69.6812
1	860.333	19.0168	4.9223	0.0839809	0.411451	0.248137	82.9414
1	828.667	10.782	5.06711	0.0808898	0.405601	0.235474	79.0524
1	806	15.2971	5.22898	0.0786772	0.408204	0.236316	70.5585
1	820	19.0149	5.50157	0.0800438	0.438502	0.246046	79.7286
1	565	4.92535	5.85202	0.0551521	0.322722	0.221442	73.7064
1	750	9.01193	5.13009	0.0732108	0.373168	0.233189	79.659
1	735.667	31.6665	5.55386	0.0718117	0.397278	0.228792	62.9885
1	770	9.04402	4.9306	0.0751631	0.367621	0.227309	70.7391
1	878.333	8.41586	4.83133	0.085738	0.412739	0.232249	80.8558
1	671.333	18.6509	5.58409	0.0655318	0.362341	0.21852	68.3838
1	730.333	27.2691	5.33959	0.0712911	0.379731	0.213959	71.2011
1	887.333	23.5289	4.87316	0.0866165	0.416963	0.246474	72.2049
1	662.333	12.801	5.43382	0.0646533	0.34805	0.240832	70.2903
1	736.667	13.3311	5.721	0.0719093	0.407812	0.230259	74.3767
1	927.667	11.5159	4.6921	0.0905536	0.424135	0.254978	76.0141
1	781	17.4479	5.45863	0.0762368	0.412719	0.23179	82.2789
1	628.667	19.681	6.17762	0.0613669	0.378732	0.230533	46.7578
1	667.667	21.0222	5.30362	0.0651739	0.343749	0.240431	82.1499
1	650	12.6274	5.48935	0.0634494	0.34595	0.219315	75.7099
1	815.667	11.4511	5.28842	0.0796208	0.419263	0.24465	79.0919
1	749.333	12.9125	5.40775	0.0731457	0.393882	0.223025	80.7985
1	773.333	14.1116	5.47567	0.0754885	0.411004	0.23971	76.1167
1	780.667	31.4748	5.41687	0.0762043	0.413068	0.228115	69.0517
1	755	9.60494	5.09551	0.0736989	0.372916	0.242978	76.0748
1	824.333	24.6064	5.4583	0.0804668	0.437379	0.244947	75.9635
1	742.667	18.6984	5.25848	0.072495	0.380944	0.245626	70.9611
1	817	17.0218	4.95047	0.079751	0.391683	0.249247	68.4311
1	820.333	14.8418	5.26029	0.0800763	0.419172	0.230933	82.2693
1	710.333	27.3022	5.35503	0.0693388	0.36907	0.240712	66.8888
1	877.333	35.0598	5.29675	0.0856404	0.452173	0.244046	72.9424
1	734	21.8758	5.41831	0.071649	0.386709	0.234012	68.0633
1	813	40.663	5.75648	0.0793605	0.45396	0.241815	82.7236
1	844.667	29.6949	5.21561	0.0824516	0.429648	0.235743	67.8826
1	611.667	8.06611	6.23798	0.0597075	0.365712	0.210314	74.6469
1	840.333	12.6767	4.86614	0.0820286	0.397143	0.246155	75.1995
1	811.333	7.89399	4.77498	0.0791978	0.37769	0.25391	82.7303
1	738.667	11.5554	5.31536	0.0721045	0.37531	0.23746	72.6433
1	672.667	25.0755	6.09526	0.065662	0.393879	0.226576	61.5822
1	630.333	6.52573	5.35754	0.0615296	0.329819	0.241519	57.1971
1	829.667	10.8999	5.42915	0.0809874	0.437709	0.227727	80.4589
1	712	19.5326	5.566	0.0695015	0.385312	0.213425	68.9858
1	727.333	14.9954	5.3503	0.0709982	0.378133	0.22915	75.106
1	724.333	11.7822	5.44601	0.0707054	0.382448	0.220638	69.3828
1	871.333	24.413	5.24879	0.0850547	0.442715	0.253396	83.8733
1	746	29.4379	5.61963	0.0728203	0.408007	0.233313	82.5529
1	807.667	31.7739	5.28959	0.0788399	0.415173	0.240298	63.1435
1	810.667	10.1807	5.1339	0.0791327	0.403453	0.239736	69.1991
1	911	41.1034	5.04232	0.0889267	0.445831	0.242472	80.3791
1	870.667	18.9391	4.95999	0.0849896	0.420263	0.238091	84.7503
1	906	10.5252	4.79847	0.0884386	0.422397	0.253621	71.2128
1	940	8.4975	4.70845	0.0917575	0.430548	0.248332	82.7709
1	978.333	15.3441	4.59602	0.0954994	0.435744	0.262299	81.3855
1	943.667	14.661	4.60537	0.0921155	0.420335	0.254344	81.8643
1	656	10.8127	5.70605	0.064035	0.363968	0.234714	63.3355
1	609.333	34.631	6.7131	0.0594797	0.398951	0.218454	65.6979
1	815.667	12.7261	5.23532	0.0796208	0.41281	0.236362	75.9071
1	789	13.18	5.11365	0.0770178	0.391111	0.240423	77.1078
1	758.667	33.5129	5.3927	0.0740568	0.397422	0.220653	70.5084
1	868.667	27.5614	5.10364	0.0847944	0.4271	0.242889	76.8811
1	813	11.1494	5.37035	0.0793605	0.425973	0.223396	83.6512
1	723	22.4962	5.67295	0.0705752	0.398216	0.21512	80.6559
1	853.667	19.2264	5.12522	0.0833302	0.423994	0.252898	78.877
1	852	25.1256	4.88528	0.0831675	0.406314	0.248583	56.2948
1	715	12.0522	5.46075	0.0697943	0.380703	0.216318	86.7422
1	825.667	26.9891	4.9926	0.080597	0.397448	0.240767	51.9311
1	937.667	17.8921	5.02383	0.0915298	0.458897	0.257927	86.1869
1	951.333	18.4893	4.90621	0.0928638	0.453841	0.262648	82.9632
1	810.333	33.6113	5.57494	0.0791002	0.436725	0.25081	83.41
1	740	13.0605	5.04126	0.0722347	0.36318	0.231044	69.3338
1	806.667	38.5881	5.28767	0.0787423	0.415135	0.229578	61.9707
1	915	29.8973	4.98687	0.0893172	0.443784	0.255862	67.4809
1	826.333	35.2971	5.39688	0.080662	0.434807	0.260484	80.9052
1	773	NaN	5.05811	0.0754559	0.37929	0.241815	75.0638
1	796.667	6.9713	4.93572	0.0777661	0.382676	0.247931	73.6785
1	875.333	23.3129	5.10817	0.0854451	0.433637	0.257124	80.1666
1	854.333	4.88172	4.78209	0.0833952	0.396877	0.243844	73.84
1	680.333	16.325	5.13645	0.0664103	0.338493	0.236569	54.3085
1	819.667	12.4415	4.83507	0.0800113	0.385411	0.227408	79.528
1	915.667	34.9294	4.96124	0.0893823	0.438916	0.253385	86.8526
1	819.667	24.4201	5.21865	0.0800113	0.416309	0.231787	81.7939
1	708.333	8.37771	5.52177	0.0691435	0.379413	0.232314	72.1401
1	544	8.40424	6.09103	0.0531022	0.319424	0.196121	82.5725
1	915.333	20.9952	4.65146	0.0893497	0.415237	0.259218	75.3808
1	874.667	24.8458	4.86588	0.0853801	0.412475	0.239257	86.3166
1	695.667	27.2671	6.06677	0.0679071	0.411161	0.205504	82.8936
1	1007	16.9603	4.74445	0.0982977	0.461628	0.250922	84.7734
1	702	12.8879	5.13296	0.0685253	0.350986	0.234881	80.0163
1	823.667	10.2871	5.11754	0.0804017	0.408353	0.243707	76.951
1	831.333	9.87082	4.7961	0.0811501	0.386657	0.241905	70.517
1	831.667	12.0897	4.93164	0.0811826	0.398867	0.247	78.6886
1	726	33.6692	5.57669	0.0708681	0.394157	0.229568	82.856
1	862	8.96939	4.99264	0.0841436	0.4163	0.258506	55.4111
1	766.333	17.4087	5.67843	0.0748052	0.422097	0.234135	75.1191
1	591	11.8458	5.64994	0.0576901	0.321583	0.203205	71.2836
1	743.333	8.64625	5.43551	0.07256	0.393228	0.224624	80.9051
1	711	41.5719	5.47596	0.0694038	0.377101	0.213011	70.9671
1	946	9.28284	4.66374	0.0923432	0.429592	0.255757	82.7663
1	632.333	9.01885	5.68686	0.0617248	0.348867	0.219179	78.8099
1	666	21.5147	5.85157	0.0650112	0.378886	0.23097	80.1199
1	938.333	21.5246	4.70396	0.0915948	0.429737	0.256941	79.6157
1	715	13.4382	5.59559	0.0697943	0.389119	0.241255	72.1024
1	661.667	27.7134	5.8246	0.0645882	0.375926	0.219459	74.9891
1	854.333	29.8535	5.54249	0.0833952	0.457919	0.24789	82.5865
1	813.667	12.7498	4.72935	0.0794256	0.374844	0.242559	81.4384
1	759	8.5959	5.06571	0.0740893	0.374456	0.228941	71.4171
1	678.333	13.7284	5.4552	0.0662151	0.360826	0.214599	63.1127
1	782	10.8567	5.25164	0.0763345	0.398548	0.244409	80.7932
1	845.333	29.7748	5.08679	0.0825167	0.415118	0.239874	74.8358
1	806	12.6707	4.94317	0.0786772	0.386488	0.228499	80.3775
1	759.667	17.5618	5.00756	0.0741544	0.369962	0.243785	69.2106
1	688.333	9.44768	5.26255	0.0671912	0.351809	0.241665	78.4944
1	822	6.90696	5.15176	0.080239	0.412904	0.238844	76.584
1	972	11.0759	4.60799	0.0948812	0.436015	0.259716	75.8393
1	935.333	10.9211	4.66037	0.091302	0.424774	0.251412	67.7604
1	791.333	7.76255	5.36948	0.0772455	0.413679	0.229172	76.1568
1	899.333	22.3342	4.76269	0.0877879	0.413206	0.253192	56.8585
1	700.333	12.3828	5.44588	0.0683626	0.370949	0.217994	66.6123
1	808.667	21.2709	5.07706	0.0789375	0.399914	0.238518	75.5606
1	713.333	10.2921	5.433	0.0696316	0.375021	0.220747	67.0944
1	716.333	10.9599	5.28286	0.0699245	0.367498	0.233158	57.4927
1	724	12.0735	5.64843	0.0706728	0.397779	0.231157	74.0751
1	682	8.50503	6.02623	0.066573	0.397111	0.229126	80.625
1	690.667	9.28409	5.41204	0.067419	0.363511	0.210206	78.753
1	749.333	13.7849	5.13308	0.0731457	0.375344	0.243266	55.0771
1	761.333	27.7999	5.47948	0.0743171	0.400697	0.238845	79.6257
1	723.667	43.6301	5.51622	0.0706403	0.387184	0.233999	72.7299
1	854.667	10.1705	4.55929	0.0834278	0.377104	0.284771	62.8865
1	765	8.56549	5.143	0.074675	0.382784	0.233142	77.9785
1	740.667	19.5396	5.41462	0.0722997	0.391082	0.233128	66.3467
1	872.333	29.1049	4.93586	0.0851523	0.418761	0.247244	67.2656
1	753	7.31644	5.19371	0.0735036	0.378862	0.241883	68.3525
1	806	12.4012	5.67323	0.0786772	0.439084	0.249495	78.7203
1	634.333	19.5814	5.83891	0.0619201	0.358981	0.209231	60.0864
1	757	38.9278	5.46754	0.0738941	0.400835	0.233736	70.981
1	743.667	10.9386	5.53981	0.0725926	0.399209	0.213321	81.8697
1	831.667	7.33959	5.09484	0.0811826	0.409615	0.248979	69.88
1	833.667	11.8333	5.03227	0.0813779	0.408433	0.245028	77.8612
1	781.333	35.301	5.46424	0.0762694	0.40442	0.228364	76.4787
1	908	31.551	4.77622	0.0886339	0.421303	0.260746	66.2194
1	712.667	7.55621	5.55632	0.0695665	0.381394	0.243501	80.5328
1	743.667	27.7934	5.38651	0.0725926	0.390332	0.23112	65.5641
1	890.333	44.9855	4.95063	0.0869094	0.42886	0.25062	68.0679
1	773.667	10.5665	5.12638	0.075521	0.386955	0.240241	63.3329
1	869.333	27.4745	5.26606	0.0848595	0.444875	0.225747	81.0465
1	822.667	15.2478	4.84581	0.0803041	0.386687	0.237825	71.0638
1	709	13.0627	5.80659	0.0692086	0.395859	0.232074	77.7562
1	767.667	11.7674	5.15563	0.0749353	0.381406	0.234923	82.8116
1	849.333	33.908	5.55387	0.0829072	0.446021	0.242156	79.6663
1	666.333	21.1391	5.83482	0.0650437	0.373313	0.212085	81.4076
1	701	11.6977	5.18666	0.0684277	0.35365	0.219611	63.9124
1	756.667	40.4605	5.53052	0.0738616	0.407535	0.243854	70.1413
1	518.333	23.3855	5.99924	0.0505968	0.302736	0.203277	64.5707
1	1130	24.587	4.32784	0.110304	0.478583	0.341637	70.1384
1	779	15.5996	5.14673	0.0760416	0.390854	0.227669	75.6153
1	865	9.76261	4.96863	0.0844365	0.419483	0.238541	82.3139
1	708.667	19.6656	5.61897	0.0691761	0.386148	0.230581	76.5527
1	621	8.39835	5.63194	0.0606185	0.338075	0.217865	66.5017
1	832.667	15.9844	5.09702	0.0812803	0.410743	0.246495	80.9094
1	754	10.451	5.32204	0.0736013	0.389977	0.239553	73.6493
1	843.333	30.5849	4.97507	0.0823215	0.40804	0.240506	74.0205
1	918.333	6.77462	4.97776	0.0896426	0.444776	0.260913	74.7404
1	780	28.1644	5.04311	0.0761392	0.382073	0.2321	76.9577
1	798.667	22.7659	5.05463	0.0779614	0.389814	0.256338	61.1683
1	884.667	29.8154	4.8646	0.0863562	0.419009	0.246051	68.4541
1	784.333	8.1714	5.37088	0.0765622	0.408762	0.230971	84.159
1	836.667	6.26583	4.78457	0.0816707	0.390878	0.26767	80.1585
1	798	13.0211	5.4539	0.0778963	0.424394	0.228158	74.584
1	675.667	19.0137	5.70392	0.0659548	0.370785	0.212042	80.6008
1	554	31.9297	5.8107	0.0540784	0.314593	0.220025	66.0174
1	736.667	7.54734	5.17702	0.0719093	0.367657	0.242138	81.6584
1	789.333	17.1978	5.50784	0.0770503	0.420471	0.234913	69.3893
1	641.667	21.2804	5.89475	0.0626359	0.36589	0.220609	55.9581
1	773.333	8.98927	5.07573	0.0754885	0.381174	0.249717	80.673
1	843.667	11.5733	4.91094	0.082354	0.403009	0.230671	80.3591
1	652.667	8.6157	5.3261	0.0637097	0.337895	0.240292	69.8121
1	722	20.591	5.62814	0.0704776	0.395877	0.216405	77.7221
1	891.667	28.0874	4.93115	0.0870395	0.425723	0.248274	77.5586
1	631	13.5449	5.3581	0.0615947	0.329596	0.22141	62.7189
1	837.667	8.11469	4.79013	0.0817683	0.389504	0.240462	70.2156
1	751	26.0445	5.53078	0.0733084	0.403709	0.232413	63.1414
1	666.667	32.6521	6.65747	0.0650763	0.427974	0.214218	57.071
1	880.333	6.89039	4.62094	0.0859332	0.397375	0.261459	76.4464
1	886	25.9427	5.01338	0.0864864	0.431413	0.238513	80.3047
1	939.333	17.6309	4.73856	0.0916925	0.434155	0.267282	78.1757
1	976.333	20.7388	4.93838	0.0953042	0.47108	0.27623	79.0882
1	853.667	31.9318	5.1454	0.0833302	0.427149	0.231783	80.5733
1	774.333	17.7607	5.64838	0.0755861	0.425627	0.240336	58.2398
1	707	17.7396	5.54003	0.0690134	0.381574	0.218274	53.6277
1	757.667	14.1023	5.55185	0.0739592	0.407037	0.247817	70.2584
1	624	16.061	6.47016	0.0609114	0.393123	0.22642	66.8536
1	828	14.5228	5.09447	0.0808247	0.411334	0.258205	69.2816
1	596.333	15.1268	5.77857	0.0582107	0.336283	0.231705	79.6946
1	831.667	8.55039	5.07594	0.0811826	0.410261	0.241453	73.7797
1	752.667	24.9307	5.51079	0.0734711	0.404465	0.230382	77.4821
1	719.333	25.3187	5.61215	0.0702173	0.388561	0.239946	65.5712
1	927.333	28.7567	5.07239	0.0905211	0.45495	0.243434	82.4352
1	852.667	11.0044	4.87705	0.0832325	0.404638	0.244031	81.1572
1	757.667	30.115	5.33012	0.0739592	0.39201	0.240712	70.4284
1	814.667	12.1546	5.0367	0.0795232	0.400563	0.237283	75.1355
1	692.333	25.2967	5.77843	0.0675817	0.387247	0.220073	70.2932
1	851	19.1389	4.99122	0.0830699	0.414167	0.262989	79.5333
1	818.667	22.1078	5.1475	0.0799137	0.409052	0.24575	77.1628
1	688.333	13.3329	5.23211	0.0671912	0.347275	0.251686	78.0104
1	934.333	25.5766	4.87921	0.0912044	0.443711	0.265579	65.8618
1	899	16.6203	4.64611	0.0877553	0.407254	0.260138	59.7238
1	750.333	35.6914	5.50323	0.0732433	0.403164	0.236364	75.616
1	830	46.1691	4.73817	0.08102	0.383311	0.25543	74.9803
1	727.667	10.9363	5.07193	0.0710307	0.359518	0.249535	62.1903
1	846.667	11.2435	5.09198	0.0826469	0.41972	0.263274	65.42
1	696	10.5338	5.02015	0.0679396	0.338791	0.239479	71.581
1	846.667	28.2678	5.14338	0.0826469	0.418829	0.257684	78.6433
1	708	11.9526	5.31968	0.069111	0.365952	0.231515	83.4882
1	619.667	23.8409	5.70209	0.0604884	0.342959	0.207578	69.1473
1	771.333	5.05133	4.88063	0.0752932	0.36574	0.259313	74.2435
1	703.667	19.3601	5.7244	0.068688	0.392388	0.238666	71.0671
1	776	14.1881	4.97137	0.0757488	0.377898	0.271302	79.8178
1	463.667	6.02072	7.03437	0.0452605	0.319501	0.181411	82.0913
1	804.667	15.5804	5.05798	0.0785471	0.397029	0.237756	74.5581
1	674.667	21.1808	5.82091	0.0658572	0.383261	0.230143	84.0267
1	709.667	13.1276	5.66526	0.0692737	0.384449	0.231483	74.3285
1	916	12.2715	5.15424	0.0894148	0.459328	0.249402	66.0671
1	780	8.30664	4.9962	0.0761392	0.376893	0.24532	42.9495
1	675.667	6.99016	5.66653	0.0659548	0.37314	0.218322	77.6857
1	759	45.7998	5.3183	0.0740893	0.388642	0.224451	68.7524
1	803.667	10.6236	5.20579	0.0784494	0.405988	0.2456	72.7924
1	818.667	9.08645	5.11104	0.0799137	0.40687	0.242105	73.402
1	818	18.0072	5.0147	0.0798486	0.394955	0.254321	78.6983
1	701.333	14.5118	5.72801	0.0684602	0.384787	0.217521	77.3098
1	803.333	25.5054	5.00863	0.0784169	0.391452	0.240636	86.8994
1	844	11.9512	4.61821	0.0823866	0.377982	0.262339	75.1738
1	950.333	62.59	4.74435	0.0927662	0.438066	0.254465	71.9501
1	793	9.55492	5.13913	0.0774082	0.39354	0.243622	74.7776
1	809	19.1366	4.92063	0.07897	0.386267	0.239789	70.1586
1	819.333	11.3913	5.00703	0.0799787	0.400047	0.25528	78.0394
1	876.667	23.6767	4.737	0.0855753	0.404474	0.253317	74.6532
1	863.667	14.3873	4.89189	0.0843063	0.410822	0.246459	78.2922
1	783.333	8.2478	5.01323	0.0764646	0.381789	0.234154	77.4251
1	882.667	14.8512	4.62073	0.086161	0.396309	0.25797	78.5288
1	884	12.8982	5.37829	0.0862911	0.454652	0.257274	75.9294
1	702.333	39.511	5.27256	0.0685578	0.359944	0.237416	70.404
1	801	17.6257	4.87872	0.0781891	0.380971	0.244844	70.7535
1	849.333	14.0945	4.88838	0.0829072	0.403751	0.253655	79.497
1	865	13.9717	4.92798	0.0844365	0.414995	0.242846	74.8921
1	635	7.12635	5.4589	0.0619851	0.334834	0.21167	74.7255
1	552	6.51797	5.76744	0.0538831	0.310008	0.196064	61.8456
1	850.333	7.3203	4.63705	0.0830048	0.383742	0.270053	86.7913
1	794.333	10.418	5.23172	0.0775384	0.404215	0.246793	69.5225
1	674.667	11.9278	5.85638	0.0658572	0.38173	0.211387	81.9488
1	894	9.55743	4.56502	0.0872673	0.397297	0.270379	78.9885
1	742	12.2556	5.76192	0.0724299	0.415692	0.230252	79.032
1	868	15.9787	4.90868	0.0847293	0.414603	0.262577	76.0472
1	678	16.4135	5.90565	0.0661826	0.387611	0.230861	82.7329
1	646	7.34757	5.84401	0.0630589	0.368213	0.215293	68.0382
1	833.667	16.8539	5.1027	0.0813779	0.413731	0.245523	75.1491
1	690	21.2554	5.50861	0.0673539	0.365865	0.227312	73.7064
1	783.333	9.29784	4.89894	0.0764646	0.372867	0.243735	66.8692
1	645.333	13.7435	5.92796	0.0629938	0.37022	0.219609	74.0475
1	906	8.11351	4.95231	0.0884386	0.430318	0.253403	76.4865
1	815	6.07033	4.83151	0.0795557	0.384005	0.247335	68.9894
1	707.333	19.5613	5.35491	0.0690459	0.369788	0.232981	67.0749
1	805	17.8699	5.42435	0.0785796	0.422377	0.239568	70.2587
1	904.667	18.9368	5.07519	0.0883085	0.446852	0.251911	73.5251
1	772.667	23.6796	5.09874	0.0754234	0.380691	0.25055	66.6144
1	882.333	12.1884	5.0087	0.0861284	0.428966	0.238949	75.3485
1	772	24.1936	5.37235	0.0753583	0.399888	0.242266	68.354
1	898.333	6.72797	4.65397	0.0876903	0.406052	0.253468	75.7668
1	681.667	27.4499	5.76266	0.0665405	0.37743	0.222544	74.5428
1	732	4.70324	5.24488	0.0714537	0.373054	0.232163	76.5803
1	684.333	9.09547	5.38074	0.0668008	0.358519	0.23318	74.9913
1	1003	11.9424	4.74547	0.0979072	0.462764	0.284585	82.2989
1	787	31.7748	5.04238	0.0768225	0.38667	0.23571	60.8082
1	691	14.9671	5.4441	0.0674515	0.365641	0.22217	79.5527
1	859	11.2128	4.72343	0.0838508	0.394717	0.269884	74.0241
1	930.667	15.54	5.09698	0.0908465	0.459063	0.246439	80.8687
1	726.667	13.587	5.11962	0.0709331	0.361767	0.263682	62.4888
1	797.333	14.738	5.17238	0.0778312	0.401683	0.237317	68.196
1	783.333	32.1813	5.03029	0.0764646	0.384189	0.240745	71.5148
1	695	9.25782	5.50159	0.067842	0.369586	0.228366	78.4069
1	736	12.7591	5.30834	0.0718442	0.38014	0.234573	66.0083
1	916.667	38.2129	5.09305	0.0894799	0.44483	0.254259	73.7769
1	695.333	17.485	5.56251	0.0678745	0.374376	0.216463	71.1237
1	880.333	25.2053	5.18761	0.0859332	0.444875	0.248909	85.8902
1	907.667	18.5781	5.28915	0.0886013	0.467603	0.241993	81.1194
1	721.333	8.58389	5.06064	0.0704125	0.355012	0.240413	59.1026
1	773.667	12.6748	5.43106	0.075521	0.408975	0.247064	62.7681
1	767	40.68	5.38317	0.0748702	0.402532	0.240676	73.7775
1	880.333	10.9769	5.16356	0.0859332	0.438497	0.259122	80.6849
1	778	10.7853	5.00703	0.075944	0.37912	0.246319	70.6027
1	621.667	18.0651	5.8695	0.0606836	0.354662	0.206347	70.0446
1	737.333	18.869	5.45455	0.0719744	0.389968	0.227911	67.905
1	739.667	28.817	5.86454	0.0722021	0.42107	0.231018	70.6542
1	721.333	10.433	5.43984	0.0704125	0.380785	0.224274	86.5355
1	1022.67	10.7608	4.77884	0.099827	0.475533	0.261144	84.0452
1	754.333	38.2605	5.4089	0.0736338	0.397862	0.22941	83.9645
1	873	17.7947	4.70342	0.0852174	0.399922	0.254162	65.0934
1	793.333	19.754	5.10152	0.0774408	0.394281	0.232051	58.2875
1	733.333	7.01855	5.27817	0.0715839	0.377038	0.220966	77.3277
1	697	10.7747	5.59852	0.0680372	0.380182	0.210556	80.2126
1	675.333	33.1967	5.68214	0.0659223	0.373923	0.236117	58.3593
1	720.667	32.702	5.54619	0.0703474	0.390167	0.222554	75.8937
1	887	29.4045	4.70254	0.086584	0.405006	0.256375	69.8616
1	779.667	9.6764	5.23753	0.0761067	0.393739	0.225977	75.5593
1	736	15.6155	5.21536	0.0718442	0.369936	0.221091	65.4143
1	759.333	7.68193	5.45803	0.0741219	0.404296	0.24925	62.7602
1	744.333	19.4899	5.29153	0.0726576	0.380973	0.240896	57.5458
1	736	9.74	5.42691	0.0718442	0.387261	0.241004	82.2939
1	683.667	15.3609	5.28709	0.0667357	0.351155	0.22553	75.7594
1	777.333	8.17154	5.11641	0.0758789	0.386963	0.230752	82.7696
1	829	8.0179	4.75695	0.0809223	0.383278	0.237542	76.2085
1	882.333	28.428	4.94218	0.0861284	0.422963	0.250389	75.493
1	857.667	10.1598	5.04757	0.0837206	0.421989	0.236516	67.0326
1	820	18.9991	5.27527	0.0800438	0.419874	0.243977	77.0474
1	819.667	24.2063	5.11356	0.0800113	0.404641	0.243799	75.8113
1	739	9.29195	5.72862	0.072137	0.413073	0.223924	77.0746
1	906.667	16.2615	4.56192	0.0885037	0.402725	0.257916	71.9067
1	954.667	6.84605	4.70106	0.0931892	0.436088	0.26676	81.9694
1	779.667	16.3509	4.91918	0.0761067	0.37068	0.236432	59.3246
1	760.667	20.5	5.43908	0.074252	0.401434	0.239006	67.762
1	816	21.6475	5.32081	0.0796534	0.423116	0.241968	55.688
1	617	22.9154	6.85524	0.0602281	0.393836	0.245181	68.3645
1	871.333	38.243	4.89804	0.0850547	0.414595	0.25858	71.921
1	827	35.3668	5.03949	0.0807271	0.404192	0.244284	68.7846
1	940.667	9.83761	4.98109	0.0918226	0.453142	0.262783	81.4677
1	620.333	20.7724	6.14996	0.0605535	0.37168	0.214241	74.8106
1	821.667	21.2339	5.29157	0.0802065	0.419671	0.248333	60.0373
1	788.333	17.9425	5.21405	0.0769527	0.401294	0.256297	83.3297
1	790.333	10.5147	5.39821	0.0771479	0.415308	0.222389	86.2192
1	764.667	43.1241	5.39179	0.0746425	0.394605	0.235457	68.158
1	670	18.3461	5.7263	0.0654016	0.371248	0.223157	68.9895
1	747.333	13.9118	5.47167	0.0729505	0.395807	0.240435	74.1537
1	604.333	22.7655	6.19843	0.0589916	0.365634	0.207621	70.4067
1	865.333	12.9266	4.82671	0.084469	0.406299	0.244755	76.1732
1	700.333	48.4372	5.55255	0.0683626	0.378953	0.242069	73.0762
1	802.333	14.4292	5.49105	0.0783193	0.428543	0.234712	60.761
1	867	14.972	5.10089	0.0846317	0.430679	0.248976	65.9468
1	868.667	15.6687	4.95907	0.0847944	0.414169	0.264013	75.3128
1	724.667	9.55549	5.34891	0.0707379	0.375622	0.239744	86.144
1	763.333	17.7314	5.53706	0.0745123	0.411268	0.237217	77.7028
1	756.333	17.7574	5.47374	0.073829	0.402694	0.241645	72.0238
1	838	10.861	4.88671	0.0818009	0.39559	0.234298	63.7572
1	769	8.76781	5.18146	0.0750655	0.38794	0.244085	70.6717
1	751	8.64101	5.03466	0.0733084	0.368594	0.239405	77.7222
1	629.667	32.815	5.83037	0.0614645	0.358744	0.221313	57.525
1	881.667	15.9091	4.86016	0.0860634	0.416442	0.243192	83.9312
1	1013.67	19.7695	4.75238	0.0989485	0.467327	0.253342	79.1763
1	936.333	11.5699	4.90186	0.0913996	0.446219	0.26237	80.4357
1	666.333	8.63245	5.31195	0.0650437	0.344021	0.220345	77.2788
1	769.667	29.8027	5.51591	0.0751305	0.408158	0.228619	64.0086
1	589.667	12.018	5.61502	0.05756	0.322719	0.202989	68.3443
1	807.333	33.9181	4.93343	0.0788074	0.386803	0.246939	69.2094
1	813	10.1787	5.08835	0.0793605	0.399624	0.229776	76.0656
1	650.333	35.247	6.205	0.0634819	0.392293	0.22003	64.9934
1	778.333	10.9131	5.0229	0.0759765	0.379081	0.237925	76.253
1	847	15.5138	4.92873	0.0826794	0.407266	0.26057	59.0311
1	885	8.54462	5.11227	0.0863887	0.441529	0.26323	71.9195
1	798.333	13.305	4.90693	0.0779288	0.382057	0.23643	79.9694
1	746.333	26.5648	5.43616	0.0728529	0.394315	0.225974	69.0474
1	482	9.88919	6.94836	0.0470501	0.324837	0.19123	75.9298
1	752	9.45682	4.94612	0.073406	0.362389	0.236186	68.3666
1	891	57.2076	4.98021	0.0869744	0.432528	0.249752	79.3321
1	768	16.1013	5.44938	0.0749679	0.403299	0.238429	85.7968
1	813.333	11.9153	4.79532	0.079393	0.379257	0.240218	74.8094
1	766.667	21.4531	5.09876	0.0748377	0.379228	0.245674	76.8571
1	577.333	14.5018	6.41114	0.056356	0.357784	0.195093	66.1528
1	573	12.0088	6.28443	0.0559331	0.35124	0.198125	72.5515
1	559.667	10.7489	6.40789	0.0546315	0.347298	0.196735	68.163
1	685.667	8.6159	5.51516	0.0669309	0.367902	0.228488	80.3481
1	855	15.239	4.66542	0.0834603	0.389425	0.257726	77.6123
1	673.667	16.2393	6.40575	0.0657596	0.41146	0.216906	73.811
1	841	16.3059	4.96067	0.0820937	0.406926	0.236137	60.9626
1	814	6.70544	4.95578	0.0794581	0.391483	0.240712	76.3065
1	812	14.3504	5.10017	0.0792629	0.401845	0.254677	81.3655
1	881	7.67195	5.00607	0.0859983	0.429632	0.249017	56.2938
1	939.667	12.2071	4.57137	0.091725	0.419232	0.270626	71.0804
1	857	18.3015	5.01059	0.0836555	0.418236	0.24826	79.1079
1	672.333	58.4488	6.22563	0.0656294	0.408095	0.220982	69.3759
1	821.333	26.8673	5.10389	0.080174	0.408027	0.248891	68.8571
1	754.333	53.9438	5.57731	0.0736338	0.405832	0.231333	72.0049
1	697	9.22419	5.70805	0.0680372	0.387968	0.227761	64.6463
1	528.667	29.4648	6.02802	0.0516055	0.310545	0.206285	62.2815
1	890.667	12.2158	4.86793	0.0869419	0.422354	0.25688	79.1547
1	763.333	6.23313	5.41529	0.0745123	0.403899	0.252149	72.9308
1	722.333	8.94693	5.6479	0.0705101	0.390523	0.242074	70.3501
1	775.333	32.0876	5.34111	0.0756837	0.403963	0.242405	62.489
1	803.667	22.2186	5.42929	0.0784494	0.421999	0.23462	79.0439
1	774	19.4017	5.12074	0.0755535	0.384161	0.229154	73.9355
1	687.667	17.0405	6.23139	0.0671262	0.418264	0.212543	73.182
1	801.333	22.0415	5.18853	0.0782217	0.404544	0.234484	71.4867
1	915.667	21.2246	5.18862	0.0893823	0.462106	0.243733	83.4689
1	872.667	22.1009	5.43418	0.0851848	0.460466	0.251606	83.7311
1	959	44.262	5.26549	0.0936122	0.48385	0.260303	78.6977
1	897	15.1683	5.02115	0.0875601	0.439224	0.233901	84.2504
1	689	9.68403	5.53205	0.0672563	0.369349	0.226615	66.0985
1	793	8.36882	4.97009	0.0774082	0.382546	0.227852	78.4063
1	786	12.968	4.90431	0.0767249	0.375655	0.261155	73.0591
1	798.667	10.242	5.06154	0.0779614	0.392531	0.243707	68.9033
1	747	52.2392	5.30344	0.072918	0.384605	0.233014	72.3681
1	750	27.1249	5.24036	0.0732108	0.380798	0.232423	45.8299
1	772	17.8749	5.19088	0.0753583	0.388108	0.245313	80.1103
1	828.333	20.6516	5.39717	0.0808573	0.436053	0.245805	75.1704
1	795.333	51.5841	5.16231	0.077636	0.399501	0.241695	58.0722
1	644	30.4736	6.0382	0.0628637	0.37756	0.221425	71.5486
1	795.667	11.7052	5.17275	0.0776685	0.397394	0.22903	81.899
1	619	16.9632	5.85475	0.0604233	0.351725	0.219491	73.4548
1	730.333	16.3306	4.97076	0.0712911	0.351989	0.261336	73.5472
1	781.667	25.0773	5.59897	0.0763019	0.426958	0.248631	78.002
1	785.667	8.93169	5.18444	0.0766924	0.394681	0.245299	80.6043
1	618.667	17.0732	6.05946	0.0603908	0.359163	0.201193	68.5894
1	745.333	8.72439	5.30979	0.0727553	0.385119	0.234417	81.2273
1	755.333	20.2171	5.29886	0.0737314	0.388362	0.224288	68.0937
1	825.333	36.931	5.04228	0.0805644	0.401771	0.244844	71.535
1	761.333	11.2343	5.4337	0.0743171	0.399908	0.227675	74.7892
1	825.333	37.4862	5.17018	0.0805644	0.415611	0.250499	71.635
1	856	43.4521	4.9498	0.0835579	0.413559	0.256375	65.4486
1	834.333	14.3666	5.29291	0.0814429	0.424447	0.234463	77.6938
1	775.333	25.5341	5.66615	0.0756837	0.427993	0.23817	73.0034
1	876.333	19.9748	4.92337	0.0855428	0.419839	0.262564	76.3877
1	803.667	31.4251	4.79911	0.0784494	0.375567	0.257215	76.3623
1	723.667	8.16694	5.61407	0.0706403	0.390391	0.226942	85.6793
1	775.333	19.4424	4.84199	0.0756837	0.364676	0.251205	69.1252
1	981.667	47.7382	4.37949	0.0958248	0.416544	0.282982	70.9717
1	941.333	19.7278	4.84468	0.0918877	0.444146	0.255837	77.0648
1	1018	24.5946	4.67529	0.0993715	0.463592	0.250357	78.1934
1	741.333	10.3889	5.40168	0.0723648	0.389003	0.226238	77.0216
1	881.667	29.1431	4.82574	0.0860634	0.412359	0.25395	64.207
1	713.667	21.7573	6.08007	0.0696641	0.41738	0.203015	80.1899
1	787.667	11.7038	5.40673	0.0768876	0.414987	0.231146	79.5976
1	751.333	9.535	5.51476	0.073341	0.400613	0.222999	84.6925
1	753.667	36.0067	5.4932	0.0735687	0.400019	0.244647	68.5022
1	740	10.5877	5.52304	0.0722347	0.394356	0.237796	76.5308
1	861.667	6.54349	4.80271	0.0841111	0.400656	0.257099	69.0116
1	825.667	17.7446	4.77555	0.080597	0.384213	0.248876	71.9
1	589.667	16.6527	6.35158	0.05756	0.362973	0.195689	82.1722
1	729	19.4422	5.61051	0.0711609	0.399336	0.227053	78.9647
1	831.667	7.60124	4.96972	0.0811826	0.399045	0.242869	81.3404
1	685	31.3046	5.58299	0.0668659	0.372255	0.232534	71.161
1	787	12.9694	5.41868	0.0768225	0.415243	0.240699	62.2029
1	766	27.5091	5.73809	0.0747726	0.428065	0.225418	77.1177
1	710.333	12.8981	5.27362	0.0693388	0.364108	0.233395	73.5271
1	972.667	16.2164	4.57378	0.0949463	0.433014	0.264208	70.0503
1	663	7.66923	5.47039	0.0647183	0.354144	0.22711	80.7699
1	840.333	9.08126	4.87851	0.0820286	0.397507	0.264785	58.6697
1	644	8.69695	5.59203	0.0628637	0.350279	0.256086	56.6383
1	894.333	24.3216	4.94091	0.0872998	0.429639	0.243192	76.7591
1	837.667	15.9768	5.27409	0.0817683	0.429746	0.240856	82.3907
1	747.667	14.9872	5.23751	0.072983	0.379306	0.228667	64.715
1	891.333	7.68534	5.02219	0.087007	0.434074	0.234268	80.4796
1	810.667	25.6711	5.43688	0.0791327	0.430826	0.264874	71.877
1	694.667	7.63761	5.25013	0.0678095	0.354786	0.238488	76.4892
1	854.667	7.56765	5.02305	0.0834278	0.418018	0.234497	68.4975
1	828	11.7597	5.19927	0.0808247	0.42046	0.248918	70.0181
1	789	32.7536	5.24157	0.0770178	0.401869	0.230796	80.235
1	850	9.27794	5.03265	0.0829722	0.414995	0.248348	81.1693
1	926.333	7.35199	4.74907	0.0904235	0.427923	0.248303	78.4215
1	744	4.49508	5.35254	0.0726251	0.386611	0.241347	73.5563
1	873.333	11.3739	5.00091	0.0852499	0.424896	0.233199	77.1035
1	935.667	15.8355	4.7716	0.0913345	0.434757	0.25913	71.903
1	737.667	11.9237	5.34265	0.0720069	0.384019	0.251428	82.567
1	671.667	10.7815	5.68104	0.0655643	0.372581	0.226398	61.7949
1	709.333	15.0312	5.16896	0.0692411	0.356132	0.239071	79.269
1	837.667	19.1199	5.07346	0.0817683	0.412724	0.236837	78.8732
1	697.667	20.3732	5.59907	0.0681023	0.380689	0.222509	75.2649
1	776.667	19.4953	5.2136	0.0758138	0.394783	0.224664	71.1044
1	700	9.03519	5.46217	0.0683301	0.369155	0.231954	55.5967
1	768.667	67.747	5.30791	0.0750329	0.392054	0.231304	64.139
1	737.667	12.4885	5.56635	0.0720069	0.398967	0.23452	76.7922
1	732.667	8.19683	4.93587	0.0715188	0.353027	0.238759	76.2571
1	718.667	11.7155	5.71197	0.0701522	0.40106	0.242112	70.39
1	628	16.5898	6.15014	0.0613018	0.375151	0.199322	72.4235
1	662.333	6.27335	5.59127	0.0646533	0.361461	0.228986	74.9132
1	709.333	21.3078	5.91922	0.0692411	0.405894	0.206095	75.3584
1	868	29.3098	4.86408	0.0847293	0.408287	0.244407	74.1667
1	911	40.8745	4.75103	0.0889267	0.422116	0.255877	73.1501
1	751.333	18.4702	5.25113	0.073341	0.384081	0.223642	71.9687
1	845.667	24.5436	5.63145	0.0825492	0.452564	0.234197	81.0863
1	673	14.3756	6.05415	0.0656945	0.38653	0.227377	69.1865
1	770.667	11.981	5.05958	0.0752282	0.380648	0.24057	59.6149
1	706.667	10.8949	5.15589	0.0689808	0.355756	0.256594	73.3382
1	742.667	23.3969	5.74	0.072495	0.407594	0.227136	66.2255
1	737	13.9619	5.24167	0.0719418	0.376243	0.242517	72.5352
1	470	8.97768	7.07378	0.0458788	0.320686	0.184852	71.24
1	843.667	8.89838	4.93613	0.082354	0.403462	0.242238	68.6225
1	768	12.5333	5.23208	0.0749679	0.391812	0.247419	78.8784
1	751.333	10.3038	5.38643	0.073341	0.393093	0.230942	73.6368
1	825.333	17.271	4.99026	0.0805644	0.401767	0.258021	80.6722
1	770	25.7206	5.19574	0.0751631	0.385615	0.221433	75.5279
1	730	14.0654	5.09932	0.0712585	0.362803	0.236029	75.2285
1	570.333	29.0573	6.48487	0.0556727	0.35557	0.222573	73.8149
1	773.333	11.4483	5.02874	0.0754885	0.378299	0.228818	72.546
1	809.333	14.0413	5.25852	0.0790026	0.413701	0.240194	84.2315
1	697.333	5.2252	5.36943	0.0680698	0.365159	0.233229	76.6763
1	730.667	27.4214	5.52499	0.0713236	0.391887	0.224299	77.571
1	1077.33	17.1489	4.4009	0.105163	0.460565	0.272538	71.2451
1	713.667	17.1462	5.72605	0.0696641	0.393767	0.206575	82.8731
1	860.667	9.34468	4.77586	0.0840135	0.398318	0.272721	64.1155
1	869	10.1658	4.95255	0.0848269	0.416783	0.242751	69.9597
1	916	10.4043	4.57544	0.0894148	0.406351	0.259739	73.501
1	861.667	24.1743	4.84075	0.0841111	0.406789	0.250592	68.576
1	820.333	18.8694	4.93367	0.0800763	0.394746	0.245179	55.505
1	654.667	6.21131	5.56441	0.0639049	0.355504	0.233262	76.8091
1	812	18.6582	4.98289	0.0792629	0.393085	0.243724	80.6227
1	770.333	11.6978	5.5925	0.0751956	0.417314	0.242232	72.5971
1	854.667	6.85057	5.04881	0.0834278	0.420527	0.24761	71.2292
1	785.333	10.3842	5.11883	0.0766598	0.38968	0.235854	68.5181
1	591	26.6655	6.24984	0.0576901	0.360438	0.193824	70.2007
1	880.667	11.9384	4.95432	0.0859657	0.424315	0.234399	82.1556
1	757.333	7.88772	5.4403	0.0739266	0.401945	0.240877	68.4247
1	927.667	8.37895	4.75805	0.0905536	0.430581	0.265511	68.5668
1	747	39.9869	5.7948	0.072918	0.41048	0.227079	61.1877
1	645.333	15.4383	5.68986	0.0629938	0.356128	0.222209	84.4276
1	820.333	21.941	5.31794	0.0800763	0.423227	0.244033	78.1305
1	774.667	13.7495	5.31796	0.0756186	0.397789	0.253577	75.3319
1	736.667	15.3651	5.45888	0.0719093	0.389112	0.219895	70.4411
1	735.333	33.7195	5.79978	0.0717791	0.416006	0.240474	73.5958
1	749.667	38.3397	5.72601	0.0731783	0.419502	0.241436	72.9251
1	743.667	24.7956	5.12514	0.0725926	0.367227	0.244721	71.4899
1	807.667	7.64185	5.0241	0.0788399	0.393488	0.224331	73.7503
1	762	10.7388	5.0425	0.0743822	0.374949	0.236547	65.789
1	848.667	26.3877	5.0288	0.0828421	0.416592	0.252894	75.245
1	761	23.3739	5.50591	0.0742846	0.404077	0.233901	73.638
1	751	8.96842	5.09762	0.0733084	0.372284	0.228901	70.3035
1	919.667	11.4948	4.61783	0.0897727	0.413649	0.26457	67.8954
1	679.667	37.1445	5.47507	0.0663453	0.361687	0.238711	58.9741
1	908.667	10.3744	4.73241	0.088699	0.419948	0.266795	69.346
1	820.667	16.7861	5.18597	0.0801089	0.4138	0.231796	84.5874
1	718.333	36.2251	5.59787	0.0701197	0.391922	0.229058	77.0093
1	831.667	12.9316	4.80874	0.0811826	0.389312	0.238102	72.7762
1	799.333	15.8813	5.22239	0.0780264	0.406119	0.238308	77.2298
1	749.333	13.297	5.2885	0.0731457	0.385607	0.228683	80.2587
1	723.333	11.4229	5.45662	0.0706077	0.384728	0.238177	67.7041
1	843	9.70402	5.15505	0.0822889	0.422823	0.236736	67.6049
1	781.667	17.149	4.93386	0.0763019	0.375611	0.233443	68.5078
1	702	8.46595	5.36356	0.0685253	0.365796	0.248288	69.0664
1	588.333	10.0828	6.25319	0.0574298	0.357011	0.209474	65.1614
1	675.667	15.9668	6.36094	0.0659548	0.417372	0.229361	64.744
1	695.667	16.212	5.54073	0.0679071	0.372855	0.25019	82.8532
1	796.667	18.9273	5.44358	0.0777661	0.423624	0.238439	84.8798
1	844.667	13.5879	5.08249	0.0824516	0.416711	0.248158	80.721
1	691.333	15.6043	5.59624	0.0674841	0.377657	0.205595	76.8495
1	771	27.7353	5.50114	0.0752607	0.413305	0.245368	78.9728
1	783.333	18.6786	5.54764	0.0764646	0.418559	0.237527	81.604
1	940.333	22.1707	4.63647	0.0917901	0.422767	0.252991	68.4971
1	813.333	6.86979	4.73665	0.079393	0.374697	0.247459	82.1925
1	577.667	6.5124	5.85171	0.0563886	0.328171	0.211877	61.2596
1	783.333	40.6917	5.64047	0.0764646	0.430319	0.242729	78.6577
1	860.333	19.0333	5.07264	0.0839809	0.425736	0.244551	66.4129
1	774.333	8.63332	5.07618	0.0755861	0.3833	0.234193	79.5856
1	774.667	24.1641	5.01982	0.0756186	0.376033	0.246202	63.634
1	836	34.7596	5.08723	0.0816056	0.413882	0.262999	78.6049
1	734	10.1931	5.23101	0.071649	0.373962	0.242176	59.8777
1	674	11.4582	6.04455	0.0657921	0.397625	0.223788	74.982
1	755	10.4084	5.23666	0.0736989	0.384635	0.214751	87.1174
1	672.667	17.8768	5.96366	0.065662	0.391413	0.227198	81.1124
1	813.333	16.5859	5.29748	0.079393	0.420588	0.230003	69.1688
1	698.333	19.9606	5.29027	0.0681674	0.361921	0.252136	74.9157
1	839.333	40.8064	5.00965	0.081931	0.41037	0.250618	66.258
1	753.333	14.0376	5.46516	0.0735362	0.400123	0.225219	80.2194
1	833.667	10.9004	5.21525	0.0813779	0.421255	0.254377	73.1186
1	829.667	10.6074	5.10608	0.0809874	0.411774	0.232577	72.9328
1	747	7.8366	5.29676	0.072918	0.384151	0.238254	79.4144
1	883.333	25.8115	4.83301	0.0862261	0.413364	0.259037	79.8571
1	663.667	8.98489	5.37981	0.0647834	0.348751	0.238582	66.0477
1	842.333	9.37059	5.07134	0.0822239	0.410256	0.270582	76.5207
1	720.333	25.9153	5.56845	0.0703149	0.39057	0.222277	65.0083
1	814.333	14.8386	5.10834	0.0794907	0.404016	0.244265	62.1089
1	848.667	16.2731	5.21708	0.0828421	0.431855	0.258097	80.695
1	938.333	8.63477	4.61389	0.0915948	0.421813	0.265955	80.5372
1	909.333	8.00216	4.77474	0.088764	0.422497	0.261393	71.8196
1	872	13.3028	5.04676	0.0851198	0.427947	0.244363	67.2259
1	790.333	9.79708	5.41102	0.0771479	0.416577	0.244684	77.1606
1	759.333	14.3452	5.32315	0.0741219	0.392732	0.234038	79.2206
1	795.333	20.8384	5.53277	0.077636	0.422101	0.248644	77.589
1	771.333	10.5754	5.02727	0.0752932	0.375539	0.231999	68.7334
1	891.667	13.3467	4.94535	0.0870395	0.429589	0.247329	81.9087
1	723.333	9.49036	5.33858	0.0706077	0.377066	0.244807	82.3963
1	865	35.5535	5.17825	0.0844365	0.433906	0.232214	77.15
1	811	18.8739	5.35617	0.0791653	0.423539	0.245289	67.514
1	860.333	28.4643	5.33128	0.0839809	0.442278	0.252761	62.5479
1	741.333	11.3339	5.39169	0.0723648	0.388621	0.249439	76.0546
1	749	18.2113	5.78325	0.0731132	0.419596	0.222548	83.5261
1	966.667	9.92835	4.95245	0.0943606	0.467041	0.267288	82.8329
1	769.667	9.20974	5.24227	0.0751305	0.392768	0.253298	72.0488
1	675.333	24.0065	5.37249	0.0659223	0.354023	0.236932	67.3888
1	672	8.28464	5.64426	0.0655969	0.368306	0.243393	61.0853
1	908.667	10.4438	4.69276	0.088699	0.416487	0.265889	73.8415
1	777.333	17.4418	5.22393	0.0758789	0.394568	0.240646	66.8904
1	824.333	15.7846	5.09504	0.0804668	0.409418	0.254083	59.5849
1	774	12.1561	4.9964	0.0755535	0.376847	0.236754	75.8005
1	639	11.626	5.77015	0.0623756	0.357653	0.197697	80.8869
1	738.333	9.72877	5.38961	0.072072	0.385675	0.229764	72.8528
1	991.333	23.693	4.68578	0.0967684	0.446537	0.267674	70.2153
1	823.667	10.2213	4.95335	0.0804017	0.396196	0.252431	84.3871
1	645	22.7101	5.53041	0.0629613	0.345645	0.244228	56.2173
1	854	30.567	4.77853	0.0833627	0.396518	0.248094	69.3425
1	835	8.86662	5.14929	0.081508	0.416674	0.237086	82.3629
1	847.333	30.5993	4.76325	0.0827119	0.394108	0.272312	62.975
1	809	8.20428	5.10551	0.07897	0.400327	0.244864	83.2747
1	570.333	29.9697	6.178	0.0556727	0.340498	0.201333	77.4331
1	906.333	20.6582	5.09653	0.0884712	0.450751	0.253178	82.9742
1	663.667	7.34453	5.7458	0.0647834	0.367875	0.229234	61.6843
1	739	18.2784	5.33325	0.072137	0.379857	0.25216	74.0379
1	571.333	14.6055	6.09655	0.0557704	0.33927	0.222795	72.9777
1	669	17.3435	5.71577	0.065304	0.374315	0.222715	71.8873
1	782.333	21.6265	6.21945	0.076367	0.474046	0.207571	81.0572
1	673.667	11.3221	5.34122	0.0657596	0.35092	0.214127	56.3521
1	763.667	10.0241	5.15538	0.0745449	0.381064	0.243707	81.9757
1	850	18.2859	4.97612	0.0829722	0.412459	0.25973	72.0266
1	647.667	20.5476	6.65524	0.0632216	0.420287	0.212094	67.1604
1	780	33.9374	5.30871	0.0761392	0.40339	0.240359	73.9895
1	747	9.54274	5.41229	0.072918	0.392212	0.227545	77.6369
1	761	9.34156	5.34999	0.0742846	0.394475	0.235639	66.3856
1	779.333	31.6595	5.42836	0.0760742	0.408643	0.241571	67.9157
1	755.333	9.36281	5.14669	0.0737314	0.379158	0.238978	69.4255
1	795.667	12.4994	5.18855	0.0776685	0.402079	0.23916	75.0071
1	842.667	7.0729	4.94995	0.0822564	0.40216	0.252778	82.7403
1	728.333	9.68302	5.42822	0.0710958	0.379162	0.240739	59.7471
1	744	10.3588	5.53037	0.0726251	0.399449	0.23576	83.2825
1	904.667	30.3989	4.79544	0.0883085	0.423118	0.260757	74.296
1	885	20.2409	4.91901	0.0863887	0.424453	0.254353	76.9477
1	705.333	12.9216	5.77185	0.0688507	0.3978	0.222073	87.621
1	788	31.0405	5.4755	0.0769201	0.420843	0.231508	73.7982
1	784.333	35.2067	5.24193	0.0765622	0.401071	0.23834	53.2648
1	861	14.9173	4.86444	0.084046	0.406637	0.247299	62.4543
1	735	12.309	5.60784	0.0717466	0.401793	0.25016	81.0619
1	556.667	7.32777	5.9066	0.0543387	0.32033	0.203275	68.9962
1	701.667	8.42853	5.39819	0.0684928	0.369184	0.235414	78.3683
1	780.333	7.95414	5.44683	0.0761718	0.413291	0.224179	78.8165
1	678.667	11.6319	5.59513	0.0662476	0.370119	0.24285	80.3654
1	692.333	23.5476	5.5234	0.0675817	0.372219	0.222694	82.733
1	898.667	13.191	4.80695	0.0877228	0.420641	0.257927	79.2744
1	894.667	9.16917	5.04632	0.0873324	0.439902	0.245788	81.5658
1	713.333	15.5492	5.29563	0.0696316	0.365914	0.253778	76.5947
1	740.333	34.9515	5.46505	0.0722672	0.39354	0.216435	73.6317
1	792.667	7.69125	4.97511	0.0773757	0.383481	0.257087	70.4551
1	669	26.6036	5.80479	0.065304	0.377864	0.216094	68.6489
1	732.667	36.2671	5.13708	0.0715188	0.365931	0.245179	58.6422
1	754	23.6182	5.22878	0.0736013	0.382993	0.226847	74.0912
1	793	50.2889	5.16304	0.0774082	0.398314	0.236545	61.7207
1	819.333	6.56115	4.70445	0.0799787	0.374392	0.251595	81.5415
1	718	10.9921	5.57927	0.0700871	0.3911	0.232007	72.555
1	863.667	18.2686	5.14254	0.0843063	0.43104	0.234408	72.435
1	840.333	14.793	5.31401	0.0820286	0.436332	0.250993	61.9952
1	659	8.76339	5.55329	0.0643279	0.357244	0.213577	70.0569
1	811	13.5672	4.84564	0.0791653	0.38295	0.249001	78.0933
1	788.667	31.5193	5.19585	0.0769852	0.396483	0.238271	57.0041
1	977	11.5782	4.77611	0.0953693	0.453267	0.265085	78.3587
1	758	8.05547	5.39961	0.0739917	0.396228	0.238579	72.7431
1	701.333	9.74064	5.30249	0.0684602	0.361221	0.214978	71.144
1	739.333	25.2467	5.60502	0.0721696	0.404546	0.238598	66.6327
1	925	12.7939	4.75233	0.0902933	0.427029	0.246244	84.1478
1	935	27.2779	5.14937	0.0912695	0.468599	0.259579	82.9109
1	712	20.7533	5.14125	0.0695015	0.356069	0.236331	63.7829
1	639.333	10.9357	6.39996	0.0624081	0.391974	0.211499	85.0047
1	790	24.6442	5.23775	0.0771154	0.402422	0.235731	67.1621
1	862	29.8241	4.8424	0.0841436	0.405166	0.246169	70.2942
1	758.333	48.8729	5.21552	0.0740243	0.382682	0.248918	73.4588
1	786	10.8588	5.21308	0.0767249	0.399641	0.234375	77.9692
1	834	20.1677	4.98453	0.0814104	0.403282	0.237794	67.3004
1	808.667	22.5233	4.72714	0.0789375	0.372002	0.251085	75.2977
1	833	48.8344	5.18319	0.0813128	0.420088	0.230742	75.5891
1	825.667	23.0704	5.11835	0.080597	0.41106	0.251335	68.579
1	794	10.9946	4.95661	0.0775058	0.382	0.237937	59.8566
1	710.333	15.8148	5.39455	0.0693388	0.372643	0.223188	73.7551
1	702	20.8555	5.40481	0.0685253	0.368411	0.230955	72.7944
1	674.333	18.5704	5.48723	0.0658246	0.360171	0.226482	63.7479
1	798	7.15441	4.99839	0.0778963	0.388654	0.248606	81.4813
1	781.333	22.87	5.34577	0.0762694	0.405558	0.238582	78.2303
1	782	24.7622	5.30583	0.0763345	0.40171	0.212628	72.3271
1	806.667	21.3286	5.12373	0.0787423	0.400672	0.238369	78.7256
1	854.333	42.3135	5.1992	0.0833952	0.433254	0.24899	64.4237
1	893.333	26.476	4.73077	0.0872022	0.411236	0.254691	70.4791
1	718	6.53134	5.48023	0.0700871	0.383236	0.237561	73.0555
1	749	13.054	5.46574	0.0731132	0.393836	0.232596	74.9623
1	761.667	44.5905	5.47355	0.0743496	0.406731	0.228711	75.0798
1	790.667	35.0047	5.36094	0.0771805	0.409237	0.235671	74.1796
1	665	25.6712	6.33801	0.0649136	0.410158	0.219458	84.0576
1	865.667	20.7073	5.08483	0.0845015	0.425962	0.251626	81.7751
1	764.333	12.5455	5.33675	0.0746099	0.395048	0.231619	74.9997
1	786	22.2814	5.34158	0.0767249	0.409569	0.245055	59.6135
1	598.333	11.4917	6.16311	0.0584059	0.358501	0.197763	72.8649
1	855.667	10.3816	5.09164	0.0835254	0.421735	0.241082	83.2457
1	772.667	32.187	5.24381	0.0754234	0.392831	0.246309	76.5167
1	890.333	17.8755	5.27625	0.0869094	0.458455	0.254193	67.5335
1	774.333	30.3892	5.03714	0.0755861	0.379349	0.247335	69.3141
1	723	10.0141	5.13058	0.0705752	0.35876	0.228089	70.5821
1	835	15.4005	5.3706	0.081508	0.432289	0.249264	58.3231
1	651	10.9423	5.90468	0.063547	0.371517	0.212646	65.2525
1	726.333	18.6461	5.82976	0.0709006	0.413699	0.246098	72.7567
1	635	29.0996	5.80699	0.0619851	0.359972	0.229022	75.0656
1	712.667	17.178	5.63148	0.0695665	0.383027	0.207871	87.7069
1	791.667	9.29785	5.2356	0.0772781	0.403573	0.238172	79.7669
1	648.333	10.9064	5.82794	0.0632867	0.367198	0.211739	70.6495
1	753.667	10.3391	4.89812	0.0735687	0.358998	0.238889	71.849
1	734.667	18.5703	5.66329	0.071714	0.405204	0.233992	68.0277
1	874.333	24.2602	5.29323	0.0853475	0.445392	0.251905	78.5242
1	893.667	9.4434	5.00588	0.0872347	0.433455	0.249081	81.8143
1	782	27.5357	5.16668	0.0763345	0.394433	0.249811	76.7776
1	689.333	21.7113	5.95505	0.0672889	0.394127	0.238869	81.8196
1	693.333	10.7026	5.43907	0.0676793	0.366505	0.215278	72.1691
1	770.333	33.335	5.33097	0.0751956	0.399615	0.238308	63.1311
1	778	17.5804	5.2329	0.075944	0.39554	0.253613	82.0896
1	692.333	7.46129	5.42653	0.0675817	0.366085	0.228541	73.631
1	783.333	16.8172	4.86602	0.0764646	0.370546	0.246802	69.7263
1	624.667	19.9209	5.61848	0.0609765	0.341584	0.22543	85.249
1	791.333	30.7578	5.36662	0.0772455	0.412982	0.22833	69.378
1	613.667	15.1838	5.84103	0.0599027	0.349604	0.207207	82.9419
1	746.667	5.60023	5.49211	0.0728854	0.396305	0.237349	86.0763
1	764.667	26.5383	5.62852	0.0746425	0.419216	0.246181	73.464
1	859	48.4736	5.15972	0.0838508	0.42938	0.253648	79.6625
1	778	13.5901	5.30236	0.075944	0.399527	0.235382	80.367
1	664	6.87754	5.23933	0.064816	0.338462	0.223904	61.7686
1	810.667	25.5517	5.09402	0.0791327	0.402272	0.255362	80.1721
1	797	8.50015	5.39402	0.0777987	0.413275	0.231984	75.1866
1	768.667	18.2808	5.33309	0.0750329	0.396853	0.227589	75.4144
1	784.667	12.3822	5.12781	0.0765948	0.390958	0.236505	72.113
1	858.667	10.6587	4.98327	0.0838182	0.414695	0.250932	73.6475
1	649.667	10.8926	6.10886	0.0634168	0.381441	0.207766	76.5458
1	965	20.7908	4.63615	0.0941979	0.435802	0.263055	79.2708
1	783.333	18.3896	5.31649	0.0764646	0.404063	0.236736	81.3335
1	852.667	24.5467	5.13758	0.0832325	0.425679	0.249812	72.7746
1	723.667	8.81448	5.27047	0.0706403	0.370668	0.22026	67.2654
1	959.667	9.41364	4.85879	0.0936773	0.450665	0.249195	76.9894
1	821.333	9.54283	5.0591	0.080174	0.404013	0.2388	75.0509
1	765	8.39011	5.19941	0.074675	0.388213	0.247251	61.6383
1	831.333	11.3744	5.04943	0.0811501	0.409342	0.26111	65.7274
1	835	42.2982	5.2526	0.081508	0.428218	0.253091	75.3663
1	720.667	17.5279	5.55359	0.0703474	0.388525	0.231125	62.9168
1	829.667	15.7938	5.33236	0.0809874	0.422741	0.232335	83.1931
1	775	11.9564	5.38485	0.0756512	0.406158	0.253003	66.999
1	900.667	14.944	5.31196	0.087918	0.465163	0.236625	75.472
1	996.667	11.6358	4.38062	0.097289	0.424763	0.27715	80.77
1	994.333	18.6573	4.42784	0.0970613	0.427659	0.253059	77.9795
1	775	38.0465	5.3782	0.0756512	0.404745	0.240813	74.7576
1	846	10.7415	4.8648	0.0825818	0.398276	0.252571	80.8983
1	793	8.20663	4.9316	0.0774082	0.381025	0.236007	69.035
1	764.667	10.114	5.45319	0.0746425	0.406202	0.231541	82.3817
1	778.667	18.9007	5.03128	0.0760091	0.379545	0.230928	65.177
1	969	26.4902	5.05325	0.0945884	0.47554	0.255929	70.9947
1	789	7.89926	4.9465	0.0770178	0.380381	0.254162	75.581
1	808.333	13.1119	5.31243	0.078905	0.417509	0.240166	79.9609
1	752.333	13.8805	5.22662	0.0734386	0.383088	0.231447	69.7713
1	907.667	45.2464	4.90449	0.0886013	0.429758	0.266497	72.043
1	755.333	12.902	5.30371	0.0737314	0.386693	0.222172	80.5584
1	949	40.6534	4.92007	0.0926361	0.453351	0.258101	67.83
1	746.333	7.84706	5.0361	0.0728529	0.365929	0.253761	82.6007
1	815.667	21.0387	5.28109	0.0796208	0.420091	0.248158	85.2482
1	627	13.3353	5.46563	0.0612042	0.334201	0.207625	72.8772
1	818.333	8.60633	4.98133	0.0798811	0.395093	0.243498	85.5739
1	742	36.4518	5.39125	0.0724299	0.387031	0.23893	66.4352
1	712.667	7.93214	5.38545	0.0695665	0.372339	0.242922	60.9266
1	712	23.3276	6.02445	0.0695015	0.412903	0.231383	79.8496
1	811.333	23.9924	5.10395	0.0791978	0.402044	0.25895	75.4108
1	828.667	11.452	4.99282	0.0808898	0.40184	0.229421	84.815
1	767	25.673	5.41007	0.0748702	0.404434	0.236252	63.2505
1	705.667	10.983	5.54639	0.0688832	0.381899	0.224275	55.5532
1	936.333	11.9325	4.73554	0.0913996	0.431472	0.253396	68.9193
1	727.667	32.9742	5.68917	0.0710307	0.402942	0.226065	64.937
1	650.667	39.1874	5.87952	0.0635144	0.366804	0.218488	68.3107
1	823.333	16.8848	5.08899	0.0803692	0.404608	0.242043	78.4104
1	807	11.6931	4.70022	0.0787748	0.36908	0.242451	69.9397
1	798	30.4739	5.50022	0.0778963	0.428057	0.244774	72.3241
1	800	6.82518	4.93351	0.0780915	0.385271	0.251724	73.3494
1	866.667	13.0364	4.7511	0.0845991	0.40115	0.2456	74.8389
1	832	9.91172	4.87987	0.0812152	0.396087	0.247578	76.9605
1	847.333	9.64449	5.13606	0.0827119	0.424673	0.241733	76.7384
1	739.667	26.6859	5.23678	0.0722021	0.37655	0.24312	64.0303
1	962	35.7561	4.78949	0.0939051	0.448359	0.257718	77.8189
1	908	15.4504	4.84437	0.0886339	0.426021	0.26921	71.3724
1	731	13.1324	5.18375	0.0713561	0.368743	0.224036	78.5718
1	797.667	23.5596	5.06055	0.0778638	0.391483	0.247222	73.2254
1	857.667	21.9544	5.09684	0.0837206	0.426057	0.246756	77.0714
1	655.333	7.78192	5.78352	0.06397	0.369907	0.227975	87.2298
1	807	10.1578	4.98233	0.0787748	0.391976	0.236283	75.9472
1	907.333	26.0706	4.95556	0.0885688	0.438094	0.257877	72.049
1	761	13.9707	5.32281	0.0742846	0.393954	0.253551	67.9446
1	569.667	8.97188	6.47928	0.0556077	0.359104	0.205263	48.9611
1	765.333	11.9634	5.33673	0.0747076	0.395702	0.241854	64.6937
1	830	46.6938	4.93579	0.08102	0.39866	0.270332	57.0889
1	658.333	46.2558	5.85367	0.0642628	0.374003	0.207052	60.2397
1	667.333	13.3162	5.58471	0.0651413	0.362546	0.228169	76.6194
1	726.333	15.8484	5.76898	0.0709006	0.401316	0.241601	69.5901
1	791	11.83	5.34043	0.077213	0.412039	0.242514	72.5252
1	930.333	11.2089	4.78375	0.0908139	0.432719	0.265949	81.5078
1	756	31.7129	5.73084	0.0737965	0.418062	0.22772	79.1294
1	781	12.8232	5.43316	0.0762368	0.413381	0.226273	74.4963
1	899	9.17544	4.82346	0.0877553	0.419739	0.255945	78.8262
1	871.333	16.6752	4.73978	0.0850547	0.401745	0.272338	73.4022
1	755.667	8.18783	4.91867	0.0737639	0.360203	0.247305	65.4922
1	892	15.8999	4.62888	0.087072	0.402524	0.261284	66.5901
1	739	18.8035	5.53354	0.072137	0.394013	0.228873	78.0185
1	801.667	26.7091	4.96156	0.0782542	0.386704	0.241793	71.7117
1	762	6.15881	5.50758	0.0743822	0.408592	0.242029	76.7576
1	776.333	22.4672	5.01743	0.0757813	0.376628	0.250546	62.7594
1	717.667	6.31775	5.39285	0.0700546	0.375763	0.239159	58.8556
1	716.667	14.3536	5.58216	0.069957	0.384787	0.228508	82.3896
1	838.667	26.2234	5.77533	0.0818659	0.470351	0.232701	79.8819
1	959.333	19.0199	4.7776	0.0936447	0.446352	0.266093	68.6071
1	829.333	41.414	5.31726	0.0809549	0.428562	0.25688	72.222
1	753.333	10.1813	5.22144	0.0735362	0.381186	0.249144	67.4669
1	787.667	8.63126	5.23624	0.0768876	0.402345	0.227908	65.2584
1	765.333	8.75589	4.88993	0.0747076	0.363431	0.243734	83.2913
1	702.667	31.1683	5.5886	0.0685904	0.375664	0.209489	64.5085
1	905.667	10.334	4.86339	0.0884061	0.429308	0.253147	75.3912
1	891	17.3778	4.76555	0.0869744	0.413665	0.262679	55.9686
1	827	41.4075	5.55534	0.0807271	0.443611	0.254808	69.8588
1	705	5.65243	5.60284	0.0688182	0.380176	0.220605	83.0757
1	845.333	9.90417	4.73028	0.0825167	0.389598	0.254882	74.9138
1	891.333	27.5054	4.84586	0.087007	0.420112	0.261407	81.59
1	837.667	9.02401	4.91895	0.0817683	0.400724	0.240248	60.545
1	661.333	6.80985	5.53781	0.0645557	0.356642	0.236198	64.7822
1	738.333	14.2307	5.63737	0.072072	0.403225	0.227113	84.4012
1	840	16.5744	4.9299	0.0819961	0.40328	0.249789	73.0861
1	828	11.6738	4.84047	0.0808247	0.389128	0.242043	75.4625
1	791.667	34.6661	5.77923	0.0772781	0.446828	0.253012	60.5315
1	816.667	18.3494	5.28641	0.0797184	0.412646	0.22861	79.5595
1	716	9.57269	5.44246	0.0698919	0.379241	0.218469	74.9358
1	757.333	14.2349	5.29112	0.0739266	0.390831	0.242036	77.062
1	806.333	8.65963	5.09403	0.0787097	0.400252	0.230061	80.7154
1	658	10.9125	5.75343	0.0642303	0.37025	0.243222	73.42
1	743.333	15.6476	5.27078	0.07256	0.380892	0.244314	78.8942
1	742.333	24.9761	5.60281	0.0724624	0.402337	0.234744	58.817
1	701.667	4.82497	5.48736	0.0684928	0.374896	0.216169	76.8399
1	756	9.65656	5.06235	0.0737965	0.373235	0.240413	78.8412
1	842.333	10.0984	5.15449	0.0822239	0.418931	0.239146	75.7042
1	832.667	11.3763	4.9866	0.0812803	0.404867	0.261508	73.387
1	715	11.3238	5.43848	0.0697943	0.379115	0.225279	68.4274
1	812.333	10.5197	4.81447	0.0792954	0.380208	0.258961	84.1856
1	779.333	22.619	5.497	0.0760742	0.417818	0.231941	75.5657
1	753	15.4147	5.43243	0.0735036	0.394047	0.235634	64.9517
1	753.667	9.78414	5.07006	0.0735687	0.372327	0.248707	55.215
1	604.333	10.4103	6.39029	0.0589916	0.377289	0.202321	68.3521
1	761.333	14.8582	5.35196	0.0743171	0.396807	0.229009	69.701
1	652	8.68022	5.9275	0.0636446	0.373167	0.22069	85.9564
1	794.333	8.39561	5.30174	0.0775384	0.407419	0.241575	68.1577
1	811.333	8.38072	5.35684	0.0791978	0.423361	0.252729	77.2724
1	764	8.18381	5.159	0.0745774	0.382859	0.223211	80.2161
1	802.333	8.27723	4.7938	0.0783193	0.374994	0.24219	76.5462
1	719.333	13.172	5.99254	0.0702173	0.420345	0.233323	59.7747
1	826.667	10.7811	4.97428	0.0806946	0.399922	0.264088	84.502
1	835	10.6009	4.79549	0.081508	0.385573	0.242421	77.04
1	751.667	26.2821	6.07981	0.0733735	0.430864	0.231127	76.8664
1	961.667	13.2637	4.45039	0.0938725	0.41717	0.273255	73.3811
1	897.667	14.7856	4.99035	0.0876252	0.435086	0.25679	66.5286
1	764	14.9868	5.25749	0.0745774	0.38973	0.243844	47.206
1	769.333	5.3115	5.49693	0.075098	0.409293	0.235122	76.4737
1	978.667	12.4728	4.33935	0.095532	0.414097	0.252052	66.154
1	692	23.2613	5.87344	0.0675492	0.393699	0.226064	74.9724
1	753.333	8.31093	5.01853	0.0735362	0.368146	0.231268	75.9853
1	921.333	36.0337	4.79765	0.0899354	0.426777	0.26414	66.7325
1	615	9.34149	5.97953	0.0600329	0.358505	0.24433	76.877
1	558.667	8.82966	6.11962	0.0545339	0.33031	0.233352	51.4846
1	757	18.8707	5.32389	0.0738941	0.389438	0.229518	78.8768
1	829	8.69939	4.90612	0.0809223	0.393723	0.241601	79.8366
1	847.333	12.0647	4.93279	0.0827119	0.406509	0.24961	66.1232
1	766.667	32.2663	5.35411	0.0748377	0.399288	0.244133	78.0462
1	599.667	19.6752	5.58412	0.0585361	0.325569	0.231837	67.644
1	868.667	33.0105	5.48183	0.0847944	0.463406	0.256895	55.7749
1	785.667	39.7028	5.26073	0.0766924	0.402282	0.238822	74.2687
1	807	22.5276	5.46908	0.0787748	0.428824	0.231667	59.6324
1	623	14.592	6.12976	0.0608138	0.371666	0.211949	67.9333
1	639	15.5853	5.90256	0.0623756	0.363554	0.218932	66.4624
1	700.667	20.6185	5.45006	0.0683952	0.372442	0.233099	60.9476
1	784.667	11.4474	5.36842	0.0765948	0.409573	0.216726	72.5789
1	825.333	12.0627	5.20693	0.0805644	0.418055	0.241392	83.1679
1	739	18.4359	5.30971	0.072137	0.381751	0.249907	64.0407
1	771	32.3105	5.48355	0.0752607	0.41163	0.24397	73.4667
1	902	22.7879	4.85411	0.0880482	0.427195	0.26101	81.8116
1	731.667	8.74797	5.52551	0.0714212	0.394	0.234398	77.9863
1	864.333	18.464	4.83017	0.0843714	0.405186	0.251273	79.0182
1	726.333	20.6292	5.20652	0.0709006	0.369319	0.236346	69.4741
1	930	12.0858	4.61583	0.0907814	0.416624	0.260851	76.6462
1	846.333	15.4226	5.02876	0.0826143	0.412122	0.234945	78.9425
1	796.333	22.5541	5.34197	0.0777336	0.413691	0.245361	66.9657
1	790	5.63046	5.17617	0.0771154	0.395515	0.239298	77.4596
1	768.667	24.1931	5.09672	0.0750329	0.381064	0.250081	57.7766
1	763.667	8.44722	4.96293	0.0745449	0.368756	0.237634	77.0693
1	877	18.2238	4.88949	0.0856078	0.418642	0.260173	74.6523
1	687.333	6.97021	5.65536	0.0670936	0.379299	0.237605	74.1349
1	844	13.365	4.90707	0.0823866	0.40283	0.248972	69.9301
1	733.667	25.3597	5.26778	0.0716164	0.374809	0.22207	67.1936
1	748.667	6.53122	5.31542	0.0730806	0.386806	0.236709	72.4862
1	744.333	45.0455	5.56591	0.0726577	0.400301	0.244348	59.4734
1	666.333	15.3443	5.14665	0.0650437	0.333967	0.244382	57.5494
1	819.667	14.3991	5.10372	0.0800113	0.407903	0.253091	71.6627
1	762.667	9.39743	5.26234	0.0744472	0.39096	0.230301	77.6724
1	686	8.52609	5.48345	0.0669635	0.366014	0.218646	62.6402
1	666.667	24.1834	5.51384	0.0650763	0.35716	0.222034	75.5957
1	924.333	35.2192	4.83827	0.0902282	0.4315	0.260302	71.9226
1	446.333	28.6173	6.37978	0.0435686	0.276101	0.225931	78.7323
1	824.667	16.6708	5.04862	0.0804993	0.406266	0.255531	63.8127
1	822	17.6892	4.86101	0.080239	0.388708	0.24469	53.7879
1	782.667	7.15806	4.92675	0.0763995	0.375409	0.234526	71.2356
1	841.333	6.64611	4.82521	0.0821262	0.394373	0.252287	71.8787
1	689	13.6682	5.66714	0.0672563	0.376578	0.237709	82.3262
1	906	14.0479	4.68093	0.0884386	0.413996	0.244928	79.4919
1	832.667	27.972	4.84912	0.0812803	0.393987	0.264437	68.983
1	738.667	20.4761	5.577	0.0721045	0.401758	0.242076	71.915
1	776.333	14.9257	5.34611	0.0757813	0.402746	0.236244	79.0851
1	839.333	10.286	5.14603	0.081931	0.419788	0.25136	77.6026
1	833.333	10.4272	5.1828	0.0813453	0.417215	0.226131	66.9983
1	766.667	12.2873	5.41612	0.0748377	0.40377	0.230293	80.2403
1	868	18.2249	5.09812	0.0847293	0.430442	0.261054	64.6848
1	732	25.6423	5.04875	0.0714537	0.36016	0.239572	71.0577
1	763.333	10.268	5.40713	0.0745123	0.401773	0.236569	67.8303
1	682	5.82956	5.52097	0.066573	0.367358	0.236116	84.4291
1	759.333	25.1745	5.2262	0.0741219	0.382308	0.249798	81.3947
1	844	16.8496	4.91647	0.0823866	0.404698	0.26258	79.7383
1	875.333	21.3075	5.00166	0.0854451	0.423776	0.246211	73.5067
1	788.667	14.1368	5.04884	0.0769852	0.38777	0.232919	64.0407
1	769	40.6941	5.30889	0.0750655	0.398511	0.260645	50.5416
1	1249.67	17.4302	4.18208	0.121985	0.497839	0.353401	72.9017
1	861.667	16.3296	5.34773	0.0841111	0.442517	0.23457	80.9583
1	816	8.4199	5.05351	0.0796534	0.39888	0.246881	73.6126
1	813	17.4469	5.09421	0.0793605	0.404016	0.245329	78.9991
1	817.667	15.4408	5.03568	0.079816	0.401685	0.240206	77.0265
1	931	16.022	4.85004	0.090879	0.438705	0.251135	81.0424
1	830.333	27.2741	5.15942	0.0810525	0.414556	0.237701	57.8697
1	754.333	8.57878	4.96917	0.0736338	0.364551	0.253695	71.9053
1	879	8.30071	5.11808	0.0858031	0.437583	0.247441	71.6352
1	800.667	11.831	5.08873	0.0781566	0.396286	0.252119	84.0604
1	742.667	15.5284	5.47438	0.072495	0.395127	0.221788	73.3409
1	774	10.7771	5.34331	0.0755535	0.400003	0.249662	63.5348
1	670.333	11.2171	5.42377	0.0654342	0.352764	0.22738	71.7704
1	857.333	15.2885	4.95766	0.0836881	0.41224	0.246379	69.988
1	872	19.1808	5.1002	0.0851198	0.432719	0.25384	80.5077
1	759.667	16.3831	5.1349	0.0741544	0.380337	0.238468	72.648
1	973.333	12.845	4.86846	0.0950113	0.458225	0.241489	75.0442
1	675.333	17.8354	5.92311	0.0659223	0.388974	0.251588	64.4839
1	817.667	16.5256	5.22646	0.079816	0.41447	0.242583	80.4402
1	769	17.1777	5.07418	0.0750655	0.378857	0.242131	64.4341
1	677.667	7.06108	5.59036	0.06615	0.366261	0.225485	83.4453
1	757.667	19.9266	5.67118	0.0739592	0.418128	0.265769	78.3061
1	792.333	31.1332	4.96786	0.0773431	0.382483	0.256122	59.765
1	864	10.1806	4.88974	0.0843388	0.411718	0.252722	68.6198
1	791.333	29.9939	5.41473	0.0772455	0.415344	0.230007	74.5214
1	808.333	9.80336	4.98854	0.078905	0.393338	0.236362	67.46
1	775.667	17.1094	5.41713	0.0757162	0.408605	0.230901	71.4111
1	726	20.4582	5.68649	0.0708681	0.399408	0.245239	67.8442
1	679	23.6921	6.03169	0.0662802	0.396759	0.216361	69.5427
1	717.333	23.354	5.43869	0.0700221	0.381194	0.239083	75.1382
1	923.333	14.1046	4.77042	0.0901306	0.428275	0.263559	82.4246
1	837	37.7307	5.45321	0.0817033	0.438595	0.232624	68.9325
1	720.667	42.8912	5.68361	0.0703474	0.397849	0.225079	53.8194
1	778	8.79337	5.22483	0.075944	0.394612	0.244526	76.3151
1	852.333	45.8196	5.10679	0.0832	0.420045	0.237824	74.0995
1	686	8.17836	5.30308	0.0669635	0.355296	0.246633	57.3879
1	718.333	9.48315	5.50155	0.0701197	0.382813	0.228862	80.1889
1	842.667	7.38351	5.04852	0.0822564	0.408036	0.263046	85.462
1	666.333	35.6555	5.67394	0.0650437	0.368909	0.212057	57.6363
1	640	32.7013	6.0293	0.0624732	0.372766	0.226271	74.5578
1	750.667	17.0431	5.2488	0.0732759	0.383153	0.221897	71.2071
1	1002	27.5839	4.6294	0.0978096	0.450357	0.265555	81.1598
1	791	21.1966	5.27418	0.077213	0.404945	0.23712	76.5934
1	969.667	28.421	4.52489	0.0946534	0.427698	0.274346	65.5285
1	775.333	32.2855	5.49355	0.0756837	0.413702	0.224466	64.0413
1	812.333	18.5505	5.11244	0.0792954	0.404474	0.242213	84.6986
1	734.667	9.27733	5.21848	0.071714	0.37384	0.257082	80.7321
1	861	22.8879	5.10228	0.084046	0.425718	0.258089	76.6932
1	787	27.7999	5.32073	0.0768225	0.403714	0.243877	68.6426
1	877.333	11.1705	5.18647	0.0856404	0.439604	0.254933	77.3475
1	619.333	15.03	5.74382	0.0604559	0.347165	0.227539	75.9783
1	810	25.7153	4.92947	0.0790677	0.388873	0.257407	81.3611
1	787	24.9724	4.88641	0.0768225	0.373626	0.244217	59.3409
1	714.333	14.7136	5.14529	0.0697292	0.359087	0.258655	54.5819
1	955	11.0591	4.50838	0.0932218	0.417339	0.278663	70.8661
1	854.667	13.7995	5.02115	0.0834278	0.417213	0.251591	77.0761
1	795.333	19.4687	5.09764	0.077636	0.394576	0.244212	84.6797
1	880	12.0579	5.02757	0.0859007	0.431503	0.238342	81.1156
1	713.333	7.05098	5.16393	0.0696316	0.358574	0.225691	66.932
1	615.667	9.75861	6.0955	0.0600979	0.365954	0.221073	78.6488
1	830	8.93356	5.00137	0.08102	0.404062	0.222969	79.8521
1	727.333	8.80365	5.8595	0.0709982	0.414759	0.224972	71.223
1	833.667	12.6469	4.65236	0.0813779	0.37731	0.249399	85.9442
1	825	27.6186	5.30843	0.0805319	0.42588	0.236759	79.9719
1	879.333	17.8824	4.5612	0.0858356	0.389338	0.246045	70.2183
1	661.667	12.7108	5.71332	0.0645882	0.368014	0.222193	78.5246
1	869.667	18.4745	5.28244	0.084892	0.443438	0.260639	76.9302
1	893.667	11.3105	4.6436	0.0872347	0.403391	0.274626	78.3317
1	587.333	32.5195	6.53977	0.0573322	0.373156	0.216051	73.2187
1	804.667	7.11758	4.97316	0.0785471	0.389661	0.235243	82.3652
1	822.667	44.9489	5.26496	0.0803041	0.415844	0.254832	68.9517
1	698.333	18.3577	5.4208	0.0681674	0.368323	0.217297	72.6821
1	868.333	8.55558	4.54507	0.0847618	0.384556	0.269657	83.9793
1	843.667	15.9486	5.07771	0.082354	0.41799	0.234393	69.7184
1	835.667	13.6495	4.822	0.0815731	0.392455	0.247069	71.0866

## Sheet: Col_nAT_C
Predicate	Pixel count	SSE	LS Ratio	Surface	Length	Width	Axes angle
1	853.333	16.7858	4.7302	0.0832976	0.393751	0.261495	72.977
1	936.333	7.66917	4.83622	0.0913996	0.441956	0.266827	83.5355
1	825	13.7381	4.9874	0.0805319	0.401761	0.252918	87.6621
1	590	4.48741	5.94475	0.0575925	0.342843	0.223529	56.6311
1	812.667	19.6423	5.25117	0.079328	0.414948	0.248082	76.2987
1	754	19.9651	5.11483	0.0736013	0.373852	0.236237	74.9341
1	723	35.8109	5.92115	0.0705752	0.417225	0.228205	69.7084
1	664.333	23.9003	5.72736	0.0648485	0.367838	0.22493	53.9997
1	1037.33	25.4815	4.46448	0.101259	0.451917	0.276073	77.1833
1	779.333	23.4549	5.19973	0.0760742	0.395246	0.249201	73.073
1	901	12.2123	4.55961	0.0879506	0.400701	0.253623	80.4278
1	799.333	12.6058	5.07795	0.0780264	0.394469	0.229696	79.1565
1	862	7.27554	4.74145	0.0841436	0.394992	0.254557	77.1038
1	794.667	12.0348	5.19567	0.0775709	0.397311	0.245267	74.2598
1	625	17.2994	5.97498	0.061009	0.36215	0.20628	69.2687
1	874.333	8.83405	4.90062	0.0853475	0.416465	0.239137	72.5274
1	767	11.1683	5.31261	0.0748702	0.390023	0.239812	78.1577
1	694.667	12.1242	6.18381	0.0678095	0.419518	0.222631	85.2556
1	852	14.233	5.02674	0.0831675	0.415275	0.244112	73.9489
1	809.667	15.0304	5.42786	0.0790351	0.423742	0.224574	83.3511
1	933.333	15.6826	4.70609	0.0911068	0.427124	0.257561	81.6938
1	718.333	14.1474	5.33295	0.0701197	0.37291	0.236911	68.5603
1	783.333	7.59121	5.19845	0.0764646	0.393874	0.222472	75.6592
1	770.333	12.0443	5.87017	0.0751956	0.437497	0.228786	79.1335
1	914.667	38.8006	5.3021	0.0892846	0.469834	0.264135	69.907
1	617.667	13.428	5.94642	0.0602932	0.357738	0.207848	64.448
1	806.667	19.7126	5.38914	0.0787423	0.423768	0.237183	67.7652
1	545.667	12.2028	6.54267	0.0532649	0.340715	0.218138	62.8186
1	712.333	20.0067	5.18414	0.069534	0.359302	0.232306	71.9516
1	719.667	7.4302	5.34302	0.0702498	0.375181	0.22669	78.2011
1	766.667	20.717	5.09018	0.0748377	0.379241	0.235997	71.9944
1	828	25.037	5.19161	0.0808247	0.416434	0.224982	68.6699
1	835.667	23.493	5.08736	0.0815731	0.412854	0.257694	64.511
1	805	10.2822	5.02866	0.0785796	0.394536	0.25344	74.6301
1	865	24.6257	4.92545	0.0844365	0.413943	0.242817	64.4491
1	714	25.518	5.29336	0.0696967	0.368652	0.241571	58.7361
1	745	8.52708	5.00146	0.0727227	0.362943	0.248651	73.5333
1	732.667	19.6659	5.47949	0.0715188	0.389124	0.225037	81.606
1	914.333	17.6202	4.9198	0.0892521	0.435803	0.247257	79.9376
1	664	6.84355	5.98026	0.064816	0.387224	0.216857	81.2954
1	840.667	10.2128	5.14286	0.0820612	0.419008	0.245031	67.5631
1	825.333	21.0402	5.26564	0.0805644	0.419825	0.234438	68.1943
1	852	9.63314	4.83612	0.0831675	0.401848	0.242846	84.0529
1	781.667	38.0998	5.33764	0.0763019	0.405432	0.232584	54.8474
1	857.333	29.0185	5.1907	0.0836881	0.43162	0.245337	75.2216
1	872.667	20.0262	4.88732	0.0851848	0.414403	0.254745	58.6696
1	688	8.50852	6.20092	0.0671587	0.41526	0.24146	79.5549
1	897.333	19.1998	5.09347	0.0875927	0.441847	0.235267	79.0575
1	801.667	18.9499	5.28464	0.0782542	0.413112	0.250187	73.6511
1	791	11.3091	4.81299	0.077213	0.371083	0.255172	73.8485
1	827.333	43.1313	5.52889	0.0807596	0.445988	0.258357	75.5817
1	988	32.5243	4.68719	0.096443	0.446054	0.267811	63.2955
1	596.333	20.8115	6.2933	0.0582107	0.360483	0.235964	61.3756
1	711.333	6.44751	5.08472	0.0694364	0.352844	0.238248	66.0418
1	862.667	34.4317	5.20405	0.0842087	0.434473	0.269805	75.1643
1	820.667	6.60063	4.90783	0.0801089	0.392301	0.236207	76.6777
1	673	13.7653	5.10283	0.0656945	0.334381	0.224683	78.3174
1	849	17.6939	5.16375	0.0828746	0.427137	0.247819	77.3375
1	846.333	17.9297	4.89032	0.0826143	0.402121	0.248697	77.9637
1	873.333	41.6701	4.93924	0.0852499	0.41863	0.242245	78.369
1	1012	25.3939	4.52058	0.0987858	0.443386	0.275972	67.8181
1	767.333	13.6765	5.12248	0.0749028	0.381382	0.234594	71.7575
1	902	8.93769	4.97836	0.0880482	0.436386	0.260067	74.683
1	797.667	9.53992	5.25955	0.0778638	0.404515	0.215225	82.7808
1	762.333	21.8352	5.30872	0.0744147	0.390679	0.238786	75.1879
1	696.333	6.97879	5.56802	0.0679722	0.378052	0.242592	81.3398
1	841.667	23.385	5.38789	0.0821588	0.436175	0.233312	82.7868
1	839	24.976	5.31019	0.0818985	0.432279	0.23712	70.3122
1	801	25.5463	5.05346	0.0781891	0.394426	0.241225	81.8995
1	758	18.2449	5.34424	0.0739917	0.395406	0.238077	77.4211
1	824.333	8.81193	4.79573	0.0804668	0.386086	0.257829	61.3439
1	879.667	16.9309	5.04198	0.0858681	0.432428	0.2375	75.5065
1	844.333	10.8376	4.94966	0.0824191	0.404775	0.239992	81.0538
1	829	7.62559	4.97496	0.0809223	0.402038	0.251247	87.3836
1	851.333	9.46585	4.87422	0.0831024	0.404225	0.243639	69.8651
1	832	24.1668	5.22573	0.0812152	0.421924	0.235144	74.8368
1	831	18.6789	4.79661	0.0811176	0.388003	0.253091	67.6112
1	919.333	24.2511	5.22707	0.0897402	0.466781	0.249609	80.6272
1	817.333	19.2612	5.46119	0.0797835	0.434455	0.227236	80.975
1	784.333	10.215	4.78701	0.0765622	0.365238	0.250633	68.9507
1	792.333	20.6211	5.02259	0.0773431	0.388057	0.250102	68.209
1	596.333	22.5994	6.33953	0.0582107	0.36117	0.203961	83.0655
1	714.333	33.1449	5.80223	0.0697292	0.402698	0.234431	69.8149
1	734	12.0254	5.28605	0.071649	0.378764	0.237383	63.7414
1	795.667	14.3504	5.1173	0.0776685	0.395715	0.243773	61.2132
1	839	12.8048	4.99452	0.0818985	0.407103	0.248158	82.4938
1	808.333	9.7121	4.99411	0.078905	0.394408	0.261661	74.2535
1	900	63.8749	4.95863	0.087853	0.434807	0.245841	72.2751
1	869.667	21.2555	4.87164	0.084892	0.413372	0.258233	69.0281
1	761.667	56.4566	5.50155	0.0743496	0.408513	0.2342	64.5571
1	821.667	25.5532	4.88175	0.0802065	0.390574	0.25137	67.2857
1	753	18.6921	5.59649	0.0735036	0.409533	0.228506	74.2171
1	837	10.5455	4.93481	0.0817033	0.400373	0.238392	74.1319
1	701.667	6.38193	5.59502	0.0684928	0.383303	0.231204	77.6918
1	703	9.90633	5.06753	0.0686229	0.346939	0.227438	73.3314
1	780	13.8234	5.31068	0.0761392	0.40158	0.237012	58.5023
1	781.333	32.814	5.29384	0.0762694	0.401899	0.240569	76.2235
1	798.333	8.48425	5.5673	0.0779288	0.432045	0.243873	77.4059
1	788.333	32.3966	5.51862	0.0769527	0.424342	0.237672	65.2916
1	862.667	13.7718	5.08856	0.0842087	0.423709	0.254372	81.1223
1	821.333	24.7331	5.12317	0.080174	0.408792	0.26626	78.2577
1	680	17.8834	5.76354	0.0663778	0.382051	0.243204	81.5513
1	918.333	19.7044	4.86132	0.0896426	0.433909	0.25532	77.7914
1	777.333	24.203	5.38517	0.0758789	0.405563	0.233136	62.3156
1	873	9.31988	4.9345	0.0852174	0.419553	0.250298	77.8514
1	741.333	29.8202	5.20601	0.0723648	0.375894	0.247777	62.7012
1	862	11.8828	5.17305	0.0841436	0.434491	0.255669	81.8896
1	845.667	15.2045	5.22233	0.0825492	0.429151	0.23848	76.0525
1	711.333	28.8615	5.30899	0.0694364	0.368152	0.240894	80.5979
1	767	5.75274	4.95781	0.0748702	0.370918	0.254324	67.579
1	809.667	19.5345	4.93746	0.0790351	0.388565	0.239763	77.2001
1	1234.33	16.2659	4.45795	0.120489	0.533862	0.281261	77.7527
1	821.667	42.1963	5.03309	0.0802065	0.402475	0.255193	75.0062
1	753.333	18.7282	5.10172	0.0735362	0.372907	0.236622	70.855
1	619.333	9.29969	5.47534	0.0604559	0.330004	0.215021	51.3003
1	751	8.70943	5.22776	0.0733084	0.383072	0.23842	58.6708
1	815	38.8422	5.03451	0.0795557	0.399618	0.256112	63.8528
1	770.333	14.9655	5.15047	0.0751956	0.385928	0.229142	72.6658
1	851.667	11.193	5.35864	0.0831349	0.442945	0.253993	76.7202
1	730	8.69635	5.11417	0.0712585	0.363133	0.236292	65.8846
1	671.333	8.20437	5.24788	0.0655318	0.343463	0.224233	68.9144
1	767	23.1331	5.45477	0.0748702	0.405039	0.236376	63.5317
1	687.333	25.1959	5.41304	0.0670936	0.361743	0.245949	62.7208
1	821.333	25.1235	4.85312	0.080174	0.386522	0.2352	66.0256
1	726.667	13.8871	5.38866	0.0709331	0.38028	0.214849	83.8934
1	840.333	24.8029	5.27866	0.0820286	0.42936	0.245004	47.9757
1	686.667	22.0663	6.33604	0.0670286	0.415054	0.214485	85.2579
1	948	17.4092	4.90736	0.0925385	0.453994	0.261294	83.9148
1	709.333	14.1891	5.39086	0.0692411	0.37301	0.213995	74.9591
1	838.667	43.1411	5.12373	0.0818659	0.41577	0.258096	65.8603
1	944.667	18.8892	4.70079	0.0922131	0.433066	0.250359	78.5234
1	935	19.2157	5.00101	0.0912695	0.455471	0.250962	79.1955
1	860	9.42668	4.57148	0.0839484	0.383411	0.250556	67.9637
1	842	21.081	5.0799	0.0821913	0.416144	0.250455	74.819
1	800.333	21.9496	5.26871	0.0781241	0.409715	0.236081	75.1132
1	741	21.4686	5.54322	0.0723323	0.398134	0.223553	72.737
1	815	10.3645	5.11923	0.0795557	0.406271	0.248802	57.7968
1	859.333	9.41331	5.076	0.0838833	0.424974	0.25626	71.6898
1	843	32.2944	5.17296	0.0822889	0.424728	0.246939	65.9284
1	619.333	10.1413	5.74376	0.0604559	0.346326	0.237744	77.2697
1	728.667	18.9183	5.47424	0.0711284	0.385962	0.22784	77.9017
1	642.333	8.76967	5.57122	0.062701	0.348187	0.215679	67.1953
1	784.667	11.604	5.40569	0.0765948	0.411691	0.234456	77.7874
1	670	9.6572	5.5836	0.0654016	0.364445	0.2318	66.7207
1	682	17.6238	5.67308	0.066573	0.377677	0.241112	75.3772
1	752.333	13.4287	5.47612	0.0734386	0.400462	0.228228	52.4815
1	936	17.8472	4.97054	0.0913671	0.452744	0.247542	74.6429
1	782	26.8015	4.98448	0.0763345	0.378296	0.246269	78.4876
1	815	10.5053	4.94041	0.0795557	0.389193	0.255371	72.0264
1	748.333	12.0575	5.02147	0.0730481	0.361525	0.241577	84.6094
1	678	13.8943	5.83806	0.0661826	0.384272	0.232987	77.2246
1	817	27.6232	4.89694	0.079751	0.390129	0.263446	57.6787
1	600.333	13.6283	5.82384	0.0586012	0.338403	0.204315	87.2347
1	916.667	15.2236	5.08607	0.0894799	0.453772	0.248502	81.1985
1	757.667	14.9779	4.98868	0.0739592	0.367858	0.237721	74.4725
1	817	9.39614	4.86457	0.079751	0.387301	0.239458	75.4172
1	803.667	10.9437	5.0815	0.0784494	0.396826	0.23377	76.594
1	739.333	20.3442	5.47317	0.0721696	0.393918	0.233135	83.388
1	824.333	10.9949	5.09372	0.0804668	0.409188	0.241834	74.773
1	878	42.8132	5.21938	0.0857054	0.438197	0.25688	61.9457
1	908.333	12.3763	4.55504	0.0886664	0.402884	0.261068	68.079
1	689.667	15.9049	5.53938	0.0673214	0.370472	0.239605	80.8981
1	1013.67	16.0597	4.63151	0.0989485	0.456969	0.26258	74.5003
1	836	6.79199	4.74162	0.0816056	0.385479	0.262511	69.4234
1	791.667	10.399	5.04521	0.0772781	0.38909	0.235481	81.7114
1	831.667	9.33252	5.08026	0.0811826	0.412363	0.252947	76.717
1	861.667	21.2286	4.92216	0.0841111	0.413724	0.255647	71.4694
1	761	65.6501	5.49653	0.0742846	0.406588	0.248597	83.7146
1	605.333	23.2315	5.99774	0.0590893	0.353029	0.227923	49.7994
1	716.667	10.5223	5.24284	0.069957	0.366227	0.225447	79.4336
1	874.333	25.0351	5.02702	0.0853475	0.425863	0.248586	85.1866
1	607	12.3701	5.854	0.0592519	0.346644	0.222628	63.2728
1	744	7.11298	5.09007	0.0726251	0.367326	0.246754	79.1142
1	765.333	5.51348	4.75874	0.0747076	0.35478	0.251356	76.258
1	760	8.52244	5.20331	0.0741869	0.384539	0.249809	64.8396
1	665.333	9.61699	5.26479	0.0649461	0.340303	0.245697	79.2648
1	723.333	20.7548	5.39382	0.0706077	0.379089	0.236569	65.3035
1	956	19.2644	4.6826	0.0933194	0.436862	0.237668	75.3614
1	706.333	45.8557	5.21176	0.0689483	0.358739	0.252726	63.2425
1	727.333	7.20461	5.13706	0.0709982	0.362359	0.242741	80.3076
1	851.667	16.6071	5.09763	0.0831349	0.417736	0.236548	70.3888
1	936.333	12.1575	4.53978	0.0913996	0.414182	0.252177	59.5869
1	536.667	4.01463	6.43308	0.0523864	0.337507	0.202473	67.1589
1	636.333	13.217	5.31018	0.0621153	0.327732	0.259849	73.5921
1	774.667	9.95978	5.20507	0.0756186	0.392916	0.233827	66.2644
1	834	37.2128	5.24605	0.0814104	0.425571	0.221836	77.4344
1	746	13.8624	5.21112	0.0728203	0.377242	0.230264	77.2832
1	888	6.95757	4.7785	0.0866816	0.414169	0.252189	83.2893
1	877.333	31.0118	5.1656	0.0856404	0.436867	0.250765	75.007
1	846	20.8044	5.02254	0.0825818	0.406357	0.246468	78.4788
1	996.333	25.8823	4.50028	0.0972565	0.437493	0.267815	75.0437
1	901.333	15.415	4.77951	0.0879831	0.418736	0.233301	76.7797
1	841.333	6.08267	4.64219	0.0821262	0.380318	0.262001	77.6348
1	897.333	29.7652	4.78654	0.0875927	0.415929	0.270578	74.6321
1	705.333	21.4932	5.39834	0.0688507	0.369985	0.236797	51.5927
1	729	13.5228	5.3218	0.0711609	0.378998	0.260758	58.6562
1	936.333	7.21284	4.92853	0.0913996	0.446305	0.25322	78.7105
1	932.667	19.7297	4.85585	0.0910417	0.439255	0.267211	86.396
1	831.333	5.96807	4.86988	0.0811501	0.394444	0.247111	74.9897
1	862	12.6158	4.95881	0.0841436	0.415759	0.23182	78.0401
1	711.667	37.9105	5.59731	0.0694689	0.381369	0.238283	67.0245
1	833.667	16.779	5.10849	0.0813779	0.414715	0.263735	66.6926
1	861	11.9913	4.69437	0.084046	0.394343	0.248706	59.6225
1	655.333	17.2893	6.09746	0.06397	0.382836	0.23038	72.4217
1	778.333	25.8315	4.9581	0.0759765	0.375897	0.24397	73.2786
1	738.333	23.2042	5.48936	0.072072	0.39303	0.237182	83.413
1	797.333	54.5584	5.37312	0.0778312	0.417271	0.259748	79.2095
1	881	24.0165	4.84314	0.0859983	0.415619	0.257969	81.7443
1	787.333	22.7954	5.17831	0.0768551	0.393457	0.235369	78.3647
1	892.667	17.4808	5.02323	0.0871371	0.436718	0.245297	67.6971
1	810	8.43383	5.1617	0.0790677	0.405868	0.233184	80.6639
1	866	21.0503	4.85043	0.0845341	0.408467	0.244236	79.3032
1	931.667	8.031	4.83522	0.0909441	0.43511	0.268342	87.0805
1	788.667	6.47217	5.02627	0.0769852	0.384904	0.247129	76.8239
1	847	11.713	4.85535	0.0826794	0.398251	0.248047	60.7351
1	765.667	13.0128	5.25118	0.0747401	0.391999	0.265878	73.2564
1	888.667	14.5654	4.87209	0.0867467	0.422615	0.266076	72.1552
1	851.333	20.5958	4.88636	0.0831024	0.404255	0.262239	66.5861
1	754	30.9074	5.24208	0.0736013	0.386493	0.24809	72.1261
1	691	13.4204	6.07	0.0674515	0.406129	0.249201	83.3882
1	907	12.5743	4.96233	0.0885363	0.43471	0.241084	81.145
1	807.333	35.653	4.98395	0.0788074	0.391396	0.251264	75.4309
1	772	27.062	5.40804	0.0753583	0.406051	0.246115	59.7671
1	977.333	21.9923	4.93591	0.0954018	0.470565	0.257599	82.3669
1	845	15.5673	5.40385	0.0824842	0.442933	0.232639	72.1104
1	816.667	20.5847	5.20443	0.0797184	0.413102	0.248119	80.572
1	858	23.809	5.00807	0.0837532	0.416841	0.250365	69.4691
1	808	17.3085	5.24615	0.0788724	0.413073	0.258478	74.9234
1	812	21.5742	5.25054	0.0792629	0.408719	0.25707	74.9968
1	722	8.32306	5.55688	0.0704776	0.387573	0.217633	71.545
1	911.333	24.7352	5.13531	0.0889593	0.454637	0.24751	81.7169
1	767.667	23.9451	5.14213	0.0749353	0.383236	0.240793	68.0591
1	765	8.34123	5.13222	0.074675	0.381278	0.233603	83.7529
1	844	34.1336	5.36739	0.0823866	0.435979	0.249227	64.417
1	848.333	38.2313	5.07645	0.0828095	0.419045	0.246181	83.2126
1	752.667	35.5533	5.80722	0.0734711	0.41908	0.237263	77.8112
1	860.667	9.31913	5.18725	0.0840135	0.432006	0.244895	78.4157
1	645.667	9.55251	5.83057	0.0630264	0.36737	0.229492	76.6887
1	672.333	12.1037	6.04861	0.0656294	0.396111	0.238508	66.7077
1	727	10.5751	5.09325	0.0709657	0.360727	0.240036	66.791
1	817.667	14.1049	5.2193	0.079816	0.414042	0.239489	55.868
1	759	21.8848	5.09297	0.0740893	0.376023	0.228137	70.9828
1	861.667	21.0024	5.09018	0.0841111	0.42568	0.241461	68.05
1	724	14.495	5.81655	0.0706728	0.411014	0.225932	82.0579
1	807.667	8.12613	4.88273	0.0788399	0.384655	0.265811	85.6115
1	744.667	14.9194	4.91666	0.0726902	0.355814	0.236023	70.8558
1	821.667	16.187	5.17631	0.0802065	0.414995	0.247397	74.2283
1	910.667	7.34875	4.72896	0.0888942	0.418357	0.264039	77.6997
1	820.333	6.4318	5.09417	0.0800763	0.403345	0.229732	73.0451
1	755.333	16.1717	5.40588	0.0737314	0.398051	0.231949	64.2853
1	690.667	13.8709	5.45863	0.067419	0.3674	0.24564	79.2315
1	899	37.9547	4.74284	0.0877553	0.414838	0.25609	72.1387
1	770	9.10316	5.11652	0.0751631	0.382913	0.231777	69.2054
1	870.333	21.1629	4.85623	0.0849571	0.410551	0.249144	75.4004
1	758	32.9951	5.4318	0.0739917	0.400081	0.245878	63.6102
1	630.667	19.2017	6.15588	0.0615621	0.37053	0.250752	65.9109
1	886	29.1372	5.22828	0.0864864	0.447146	0.248962	65.4231
1	802	12.4311	4.57582	0.0782867	0.357904	0.264563	60.712
1	777	16.3605	5.28275	0.0758464	0.398324	0.242216	68.7204
1	724	10.7932	5.40438	0.0706728	0.377597	0.237879	55.9138
1	824.667	33.0396	5.27154	0.0804993	0.422647	0.251232	73.9783
1	625.667	39.7866	6.01957	0.0610741	0.365623	0.220245	79.562
1	888	7.99105	4.83691	0.0866816	0.41679	0.247726	71.2688
1	687.667	10.6436	5.27951	0.0671262	0.353341	0.233568	77.3703
1	723.667	8.74629	5.21299	0.0706403	0.368224	0.239201	70.5532
1	741.667	9.04978	5.56389	0.0723973	0.40173	0.227049	62.331
1	801.667	14.5558	4.89192	0.0782542	0.382707	0.27651	43.3778
1	791	11.2095	4.91564	0.077213	0.379275	0.2297	81.5959
1	909.667	15.7517	4.85321	0.0887966	0.430187	0.265803	72.0249
1	800.333	10.5641	4.98336	0.0781241	0.384909	0.244895	71.4651
1	690.667	11.3812	5.75876	0.067419	0.384809	0.238734	66.7689
1	836.333	10.3998	5.19126	0.0816382	0.419243	0.243994	67.9237
1	807	10.4558	5.13052	0.0787748	0.403084	0.265173	71.4554
1	665.333	12.9459	5.76646	0.0649461	0.37362	0.231278	82.2169
1	1073.67	36.0996	4.53897	0.104805	0.474143	0.281517	79.8933
1	853.667	6.60441	4.87721	0.0833302	0.406108	0.242925	75.8176
1	653.667	21.384	5.81236	0.0638073	0.370454	0.207807	74.1898
1	797.333	21.2114	5.35343	0.0778312	0.416682	0.24478	74.1678
1	705.667	7.46987	5.47764	0.0688832	0.372968	0.241746	69.1124
1	728	10.6872	5.24214	0.0710633	0.367196	0.234032	78.3464
1	796.333	14.4027	5.48836	0.0777336	0.426632	0.229673	80.9626
1	762.667	13.4339	5.39581	0.0744472	0.401774	0.229128	72.2986
1	871.667	13.316	4.85155	0.0850872	0.408588	0.252934	82.6801
1	870.333	26.0009	5.4911	0.0849571	0.463529	0.244078	66.1292
1	785.333	12.7192	5.17957	0.0766598	0.396036	0.242331	83.9772
1	819.333	25.8945	5.34089	0.0799787	0.420385	0.256023	71.5444
1	845.667	20.978	4.73554	0.0825492	0.390798	0.255417	84.0516
1	803	17.8973	5.2046	0.0783844	0.405216	0.242704	82.9945
1	886	8.27351	4.69282	0.0864864	0.404757	0.250359	82.3461
1	679	16.2931	5.37461	0.0662802	0.358003	0.236386	47.5975
1	772	19.4206	5.16455	0.0753583	0.390482	0.258777	81.5286
1	720	16.3554	5.35631	0.0702824	0.374472	0.231444	64.4829
1	806	9.5355	4.94949	0.0786772	0.388677	0.239705	74.5452
1	715.333	5.06048	5.2852	0.0698268	0.366621	0.23523	71.1747
1	761	21.4897	5.56679	0.0742846	0.406803	0.241014	77.9554
1	674.333	20.0062	5.18809	0.0658246	0.33828	0.238285	68.2889
1	839	8.13792	4.83793	0.0818985	0.397452	0.264494	79.8304
1	890	17.6238	5.03825	0.0868768	0.434156	0.254781	73.6009
1	803	16.0461	5.26163	0.0783844	0.401562	0.251803	61.9316
1	760	18.4253	5.49352	0.0741869	0.406737	0.244408	64.2567
1	847.333	12.7333	4.99162	0.0827119	0.411585	0.237469	79.8884
1	661.333	6.9725	5.64189	0.0645557	0.35711	0.228147	72.3619
1	762	37.6451	5.39362	0.0743822	0.399548	0.237548	72.7463
1	899	10.9577	4.61389	0.0877553	0.404436	0.256592	79.341
1	849.667	14.489	5.35607	0.0829397	0.439077	0.228271	84.4818
1	848.667	21.1111	5.04231	0.0828421	0.417388	0.249855	71.5141
1	773.333	12.9668	5.08045	0.0754885	0.382634	0.238617	79.4666
1	803.667	27.0252	4.98404	0.0784494	0.390478	0.251103	76.1553
1	739.667	32.2801	5.46659	0.0722021	0.389418	0.230025	62.5575
1	802.667	29.9189	5.32461	0.0783518	0.414626	0.239003	59.3727
1	832.667	14.9	4.73941	0.0812803	0.384434	0.25544	72.0007
1	659.333	42.4757	5.98786	0.0643604	0.377218	0.243658	64.9841
1	838.333	16.7014	5.0707	0.0818334	0.41476	0.246495	73.2311
1	669.333	21.1158	5.41937	0.0653366	0.351784	0.235385	69.8583
1	805.667	33.0636	5.34051	0.0786447	0.402074	0.252542	62.8715
1	866.333	21.6994	5.063	0.0845666	0.427097	0.259981	79.9924
1	765.333	12.5051	5.14845	0.0747076	0.382113	0.246097	61.1228
1	702	9.50583	5.40193	0.0685253	0.368859	0.230632	75.0298
1	720.667	9.72268	5.3845	0.0703474	0.377173	0.236895	73.623
1	845	9.09324	5.36651	0.0824842	0.438953	0.245381	79.7125
1	662.333	28.6491	5.85456	0.0646533	0.377458	0.225291	65.2661
1	782.333	11.6293	4.96848	0.076367	0.378771	0.255226	85.6949
1	850.667	49.2012	5.02521	0.0830373	0.41212	0.250617	79.1985
1	814	25.0958	5.23228	0.0794581	0.415186	0.227431	66.9086
1	994	14.4633	4.40094	0.0970287	0.425501	0.263623	85.4212
1	780.333	10.1049	5.16102	0.0761718	0.392223	0.240753	83.6952
1	773	24.8416	5.18575	0.0754559	0.390922	0.242091	71.0138
1	740	12.031	5.11805	0.0722347	0.368248	0.244817	67.4338
1	629	17.3988	5.66962	0.0613995	0.345983	0.236821	65.3611
1	822.667	8.88416	4.98488	0.0803041	0.397382	0.24777	78.5155
1	868.667	11.3776	4.69625	0.0847944	0.397093	0.247172	83.6753
1	804.667	17.0833	5.0945	0.0785471	0.395768	0.248348	61.5502
1	762.667	10.4526	5.17097	0.0744472	0.384026	0.248827	59.659
1	990.333	12.9149	4.67592	0.0966708	0.45173	0.253936	77.9446
1	800.333	13.4999	5.00981	0.0781241	0.390278	0.254215	67.4309
1	774	21.0051	5.45843	0.0755535	0.409563	0.232206	79.0236
1	800.333	29.3401	5.24	0.0781241	0.409885	0.253704	68.7662
1	783.667	8.20902	5.09195	0.0764971	0.386445	0.24717	68.911
1	783.667	9.2868	5.01403	0.0764971	0.382434	0.242948	71.8361
1	730	8.21217	5.41646	0.0712585	0.385696	0.240168	80.5544
1	653.333	11.892	5.74979	0.0637747	0.365994	0.247182	73.6322
1	891.333	21.0027	4.75813	0.087007	0.408997	0.258701	78.4509
1	808.667	33.335	5.58872	0.0789375	0.440125	0.241634	74.2302
1	709.667	25.0645	5.48435	0.0692737	0.379832	0.23405	74.3727
1	727	13.9317	5.37331	0.0709657	0.3784	0.243042	56.3793
1	919.333	18.9204	4.732	0.0897402	0.424249	0.251113	76.4008
1	681.667	12.9059	5.85491	0.0665405	0.383076	0.240413	69.7389
1	716.667	12.5229	5.56916	0.069957	0.388174	0.220078	76.3068
1	741.667	18.2164	5.6531	0.0723973	0.408641	0.234218	53.5637
1	883.333	17.2475	5.04607	0.0862261	0.432955	0.232596	83.512
1	820.667	8.08174	5.03528	0.0801089	0.403085	0.248224	68.0362
1	699.667	39.3099	5.64601	0.0682975	0.384571	0.203224	72.78
1	890	11.7326	4.81797	0.0868768	0.416685	0.254775	83.5023
1	771.667	28.7877	5.25982	0.0753258	0.395808	0.246412	63.7487
1	680.667	16.3087	5.60614	0.0664429	0.36667	0.239617	65.359
1	749	43.464	6.01981	0.0731132	0.438888	0.237992	64.3737
1	727.333	10.9715	5.37031	0.0709982	0.377732	0.232321	74.4436
1	662.667	46.5256	5.23605	0.0646858	0.337488	0.261171	46.5956
1	684	28.5536	5.2335	0.0667683	0.351458	0.245154	57.8506
1	863	13.0644	5.12377	0.0842412	0.427805	0.233369	82.0277
1	734.333	11.6222	5.70094	0.0716815	0.405738	0.217635	60.2238
1	1042	31.2388	4.65426	0.101714	0.473327	0.270181	81.2219
1	926	20.2851	4.91134	0.0903909	0.437522	0.258996	74.2883
1	683.667	22.1468	5.53537	0.0667357	0.36753	0.227237	65.9172
1	761.667	11.0444	5.61223	0.0743496	0.416563	0.245128	78.064
1	740	21.4566	5.362	0.0722347	0.387955	0.252587	80.2366
1	851.667	39.8358	4.71777	0.0831349	0.389178	0.270744	79.9663
1	805.333	22.582	5.28397	0.0786121	0.415308	0.250293	73.2068
1	604.667	8.08057	5.82201	0.0590242	0.341426	0.213961	76.9689
1	859	29.5182	4.91668	0.0838508	0.410912	0.254051	65.9761
1	537.333	21.9414	5.3632	0.0524515	0.281851	0.23692	42.6214
1	724.667	13.4363	5.33207	0.0707379	0.375242	0.241092	66.704
1	826.667	9.57533	4.87666	0.0806946	0.390904	0.248461	68.2937
1	966.333	17.0926	5.09561	0.094328	0.480538	0.258656	73.2808
1	814	19.3559	5.13809	0.0794581	0.407678	0.260706	80.093
1	871	9.18279	5.36151	0.0850221	0.449431	0.256595	78.1383
1	813.667	11.8912	5.20113	0.0794256	0.411287	0.235421	79.491
1	816	38.262	4.9004	0.0796534	0.389869	0.242948	67.1116
1	788.333	19.9306	5.25966	0.0769527	0.401355	0.230026	78.8151
1	822	32.9947	5.11024	0.080239	0.408599	0.231655	76.6616
1	734.667	10.6726	5.78352	0.071714	0.410176	0.239127	75.9016
1	825.667	19.9341	5.17983	0.080597	0.416887	0.244105	67.5286
1	762.667	9.39618	5.17307	0.0744472	0.383692	0.23412	73.5191
1	654	13.584	5.6257	0.0638398	0.359806	0.25532	57.4419
1	742	11.6964	5.30021	0.0724299	0.381424	0.247244	84.2939
1	950.333	10.896	4.72102	0.0927662	0.433323	0.254209	80.0066
1	828.667	25.8311	5.34784	0.0808898	0.424769	0.256137	71.925
1	725.667	16.7342	5.53938	0.0708355	0.391207	0.212232	82.4344
1	611	18.404	6.05603	0.0596424	0.355036	0.210756	71.541
1	788	11.4291	5.03132	0.0769201	0.385655	0.237677	79.6068
1	844.667	19.343	5.20326	0.0824516	0.429268	0.255747	69.4203
1	815.667	8.17102	4.9579	0.0796208	0.393864	0.257185	71.9665
1	808.667	16.9966	5.03262	0.0789375	0.396457	0.24531	70.1367
1	788	26.8843	5.40105	0.0769201	0.409001	0.235551	75.0167
1	700.333	24.6626	5.54455	0.0683626	0.378555	0.227955	77.4243
1	807	12.8573	5.31315	0.0787748	0.414511	0.236664	82.3704
1	1093	25.9222	4.60723	0.106693	0.485461	0.254359	81.5097
1	984.667	8.54125	4.72929	0.0961176	0.452847	0.271307	80.4022
1	637	21.4915	5.80807	0.0621804	0.360516	0.234385	55.6701
1	926.333	17.6022	5.05452	0.0904235	0.453428	0.25002	84.5524
1	931	7.15746	4.81737	0.090879	0.435994	0.256949	82.7809
1	894	7.75311	4.96571	0.0872673	0.4268	0.270306	69.4137
1	742.667	11.1361	5.33023	0.072495	0.385407	0.248556	77.3037
1	710	13.502	5.16377	0.0693062	0.35588	0.236675	68.8697
1	741	14.9038	5.39134	0.0723323	0.388532	0.234877	82.6006
1	855.667	26.2568	5.12115	0.0835254	0.426457	0.252829	52.0857
1	748	34.678	5.51422	0.0730156	0.401082	0.240038	77.372
1	735.333	17.1009	5.73983	0.0717791	0.404652	0.224807	71.7168
1	601.667	32.365	6.6729	0.0587313	0.3927	0.226736	67.0817
1	781.667	7.48977	5.01214	0.0763019	0.381438	0.247582	79.6374
1	821	17.4332	4.78187	0.0801414	0.381795	0.269809	74.7272
1	845	24.7968	5.18662	0.0824842	0.420204	0.261804	65.9245
1	707.333	15.0028	5.05179	0.0690459	0.347337	0.244176	74.9585
1	822.333	51.3308	4.73752	0.0802716	0.37916	0.268081	72.2074
1	857	18.2202	4.91244	0.0836555	0.408978	0.24048	66.4384
1	765.667	13.4124	5.0626	0.0747401	0.377789	0.239724	86.5668
1	700	22.5049	5.62348	0.0683301	0.380533	0.230239	71.5699
1	786.333	13.8613	5.09916	0.0767575	0.390859	0.243119	72.207
1	1012.33	17.4604	4.57071	0.0988183	0.450909	0.276042	73.1441
1	898.667	11.0932	4.77139	0.0877228	0.41726	0.252422	66.7595
1	926.333	38.3048	5.03629	0.0904235	0.45305	0.262665	73.3247
1	840	18.0598	4.79201	0.0819961	0.391232	0.255552	80.4678
1	868.667	16.2713	5.08972	0.0847944	0.428377	0.254263	70.6941
1	663	27.4216	5.60809	0.0647183	0.359716	0.218023	70.3698
1	765.333	18.8449	5.68605	0.0747076	0.420936	0.222722	80.7361
1	793.333	47.371	5.20974	0.0774408	0.40199	0.240742	61.816
1	815.333	19.3566	4.9072	0.0795883	0.389546	0.252005	64.6599
1	847.667	13.9243	4.86425	0.0827445	0.402477	0.257751	70.9509
1	743.667	9.83154	5.61087	0.0725926	0.405725	0.252854	71.9852
1	877.333	32.8798	5.23754	0.0856404	0.446863	0.260737	79.0508
1	911.333	12.713	4.81716	0.0889593	0.426737	0.264255	72.4891
1	828.667	30.2148	4.96418	0.0808898	0.401441	0.251564	72.2297
1	1078.33	15.7539	4.4166	0.105261	0.464504	0.268219	76.2654
1	859.333	12.471	4.71898	0.0838833	0.395136	0.256657	79.742
1	962	20.0511	4.77222	0.0939051	0.446926	0.260101	67.8611
1	735	13.4611	5.43873	0.0717466	0.390065	0.254661	48.102
1	699.667	24.2653	5.40571	0.0682975	0.365169	0.235948	65.7644
1	733.333	10.2097	4.93493	0.0715839	0.352552	0.242951	73.6973
1	764.333	9.34314	4.92771	0.0746099	0.366809	0.238506	78.5118
1	546.333	13.7154	6.12196	0.05333	0.324695	0.194583	59.9684
1	776	10.5244	4.99435	0.0757488	0.376036	0.235658	73.6265
1	763.333	15.042	5.56626	0.0745123	0.412991	0.242917	70.7679
1	860.667	9.29351	4.84558	0.0840135	0.40444	0.251161	73.2776
1	866	34.9108	4.79792	0.0845341	0.404448	0.256587	79.1135
1	869.667	17.9451	4.85062	0.084892	0.409926	0.249092	78.0247
1	664.667	15.3958	5.81555	0.064881	0.377436	0.234389	64.0337
1	808.667	24.0259	5.09716	0.0789375	0.401488	0.247	83.1091
1	304	19.5814	7.82059	0.0296748	0.226075	0.166266	59.9721
1	875.667	21.6442	4.79249	0.0854777	0.408674	0.255606	79.3702
1	602	9.65023	6.08431	0.0587639	0.355236	0.219406	78.4483
1	779.333	15.1536	5.48074	0.0760742	0.413623	0.224317	82.7028
1	779.667	18.4746	5.14296	0.0761067	0.387917	0.22696	62.5015
1	829.333	26.6729	5.06165	0.0809549	0.406662	0.244754	66.457
1	777.333	16.8174	5.14618	0.0758789	0.384428	0.257732	75.0211
1	573.333	21.6968	6.6726	0.0559656	0.374381	0.198795	75.0844
1	874	21.4493	4.7044	0.085315	0.399324	0.253223	69.9926
1	840.667	9.50117	5.01829	0.0820612	0.410029	0.253885	82.2895
1	555	18.2038	6.46684	0.054176	0.348975	0.216416	67.1548
1	757	28.0593	5.91246	0.0738941	0.422039	0.240742	77.0334
1	882	21.1506	5.0077	0.0860959	0.429729	0.257865	62.9377
1	660.667	6.20071	5.28671	0.0644906	0.339696	0.232076	74.4303
1	795	8.46518	4.93852	0.0776034	0.382442	0.249521	68.1974
1	879.667	13.0221	5.36257	0.0858681	0.459138	0.242307	80.4045
1	757.333	20.1968	5.44592	0.0739266	0.40145	0.238163	69.2145
1	819	27.856	5.40585	0.0799462	0.430569	0.235668	63.2476
1	811.667	10.8035	5.12164	0.0792304	0.405486	0.234159	77.3111
1	762	6.54439	4.9445	0.0743822	0.366433	0.244865	60.5783
1	774.333	42.7679	5.51518	0.0755861	0.415772	0.24947	74.0746
1	657	23.1802	6.14038	0.0641327	0.39328	0.22409	69.1409
1	755.667	32.9649	4.95031	0.0737639	0.363223	0.237549	65.6722
1	881	8.95391	4.71213	0.0859983	0.402553	0.254296	68.9949
1	788.667	29.1638	5.23474	0.0769852	0.402176	0.244985	79.585
1	732	9.14684	5.13008	0.0714537	0.361301	0.224018	57.3522
1	719.667	10.7444	5.41524	0.0702498	0.379426	0.240847	77.9909
1	727	16.5881	5.80047	0.0709657	0.410325	0.236402	74.2048
1	690.667	13.1146	5.56402	0.067419	0.374134	0.225339	76.431
1	940.667	24.5983	4.79004	0.0918226	0.436681	0.252047	78.5038
1	879.333	10.9967	4.8913	0.0858356	0.414499	0.269703	70.8577
1	829	10.4419	4.84128	0.0809223	0.391682	0.261322	64.5181
1	816.667	23.6558	5.00739	0.0797184	0.397096	0.242505	69.7018
1	884	39.989	5.11651	0.0862911	0.438874	0.24397	69.5665
1	780.667	19.7484	5.23568	0.0762043	0.398805	0.250157	70.8559
1	838.333	10.3764	5.11614	0.0818334	0.41382	0.262958	78.8787
1	766.667	6.21969	4.96948	0.0748377	0.369587	0.24074	70.1477
1	746	42.5113	5.3489	0.0728203	0.387648	0.252482	71.0764
1	879.667	28.0934	5.1919	0.0858681	0.443564	0.253595	78.695
1	669.333	53.7579	5.68355	0.0653366	0.369109	0.242992	53.1617
1	783	9.50849	5.10618	0.0764321	0.389249	0.257778	52.9083
1	877	12.2607	5.265	0.0856078	0.450575	0.255564	81.0894
1	785.667	10.9703	5.25528	0.0766924	0.399285	0.229522	76.3437
1	712.667	33.8093	5.2796	0.0695665	0.365118	0.262553	62.3261
1	695.333	33.6848	5.74525	0.0678745	0.387305	0.238349	66.1937
1	688.333	37.6825	5.65104	0.0671912	0.380059	0.234191	80.5407
1	825.667	10.7016	4.67797	0.080597	0.375163	0.238291	62.3839
1	950	7.35479	4.51216	0.0927337	0.417427	0.269381	54.3842
1	688.667	14.2872	5.49834	0.0672238	0.367839	0.228483	77.71
1	807.667	8.26941	5.01764	0.0788399	0.39552	0.257699	58.7798
1	847	7.53035	4.94292	0.0826794	0.408348	0.247792	88.0739
1	820.333	9.61257	4.70954	0.0800763	0.375992	0.263539	67.04
1	819.333	9.18083	5.06822	0.0799787	0.403947	0.244202	54.689
1	802.333	19.7713	5.55087	0.0783193	0.434158	0.228593	84.2019
1	740.667	15.9985	5.14206	0.0722997	0.368523	0.251478	72.1166
1	759	12.3143	5.3859	0.0740893	0.399292	0.250069	72.1554
1	911	12.2635	4.72803	0.0889267	0.418776	0.246678	69.5957
1	880.333	12.1977	4.71299	0.0859332	0.403351	0.264159	66.5604
1	853.667	21.2006	5.28906	0.0833302	0.437705	0.247945	80.9408
1	706	7.64845	5.60882	0.0689158	0.38647	0.250504	65.2912
1	820.333	10.0523	4.78354	0.0800763	0.382172	0.255217	84.7516
1	822.667	19.9554	4.87416	0.0803041	0.390004	0.262361	82.6789
1	768.667	9.66936	5.49586	0.0750329	0.406169	0.231586	76.3601
1	845	20.5719	4.97368	0.0824842	0.407671	0.25383	66.7312
1	767.333	15.0956	5.64745	0.0749028	0.414538	0.220615	69.8385
1	830.333	22.1356	4.85369	0.0810525	0.391633	0.24843	67.0685
1	790.667	31.4231	5.04883	0.0771805	0.38864	0.249816	74.2316
1	771.333	11.5647	5.2378	0.0752932	0.388737	0.23507	84.8336
1	800.333	9.99562	5.564	0.0781241	0.429551	0.233426	78.5982
1	757.667	9.05438	4.94673	0.0739592	0.3654	0.261829	70.5621
1	708	11.3385	5.44884	0.069111	0.375739	0.244779	77.4903
1	901.333	12.9764	4.65533	0.0879831	0.407188	0.258078	68.7712
1	738.333	15.1325	5.48356	0.072072	0.394761	0.238371	74.7487
1	723	13.5835	5.11886	0.0705752	0.361386	0.252137	60.8051
1	752.667	10.4402	5.33467	0.0734711	0.391863	0.253587	78.6432
1	784.667	10.5405	5.058	0.0765948	0.38583	0.233503	82.7405
1	833.333	9.86196	5.11801	0.0813453	0.410919	0.266187	82.1375
1	830	11.77	5.12	0.08102	0.413348	0.240287	76.2011
1	871.667	14.0732	4.98401	0.0850872	0.417566	0.256122	81.6047
1	827.667	7.61061	4.98449	0.0807922	0.401486	0.231698	78.9402
1	757	12.2992	5.5794	0.0738941	0.406187	0.238705	73.9785
1	805	6.66249	4.91425	0.0785796	0.382775	0.239618	65.2884
1	698.333	45.3705	5.66693	0.0681674	0.384982	0.232084	55.2904
1	655	8.60664	5.48709	0.0639374	0.349958	0.254123	56.7369
1	738.667	36.5519	5.80223	0.0721045	0.418208	0.231116	78.1212
1	897	16.704	4.93773	0.0875601	0.430624	0.243979	86.8388
1	765	10.7916	4.92018	0.074675	0.366526	0.239252	70.3844
1	782	15.9698	5.18832	0.0763345	0.395564	0.238443	79.3739
1	711	11.2904	5.4003	0.0694038	0.373818	0.237602	78.4438
1	743.333	8.24763	5.18973	0.07256	0.37511	0.237383	76.3446
1	664.667	30.6748	5.75744	0.064881	0.371708	0.232156	73.2159
1	752.667	29.0544	5.17871	0.0734711	0.377724	0.254686	74.8141
1	862	17.5212	4.93993	0.0841436	0.414467	0.23031	78.8257
1	773.333	11.2633	4.86336	0.0754885	0.366809	0.237472	69.0579
1	858.667	15.061	5.00643	0.0838182	0.416356	0.253587	73.4993
1	672.667	24.1456	5.53329	0.065662	0.361015	0.222315	63.3838
1	1033.67	13.753	4.59783	0.100901	0.46091	0.264625	76.7048
1	780.333	11.4647	5.23841	0.0761718	0.396142	0.234379	76.6584
1	779	16.5499	4.82568	0.0760416	0.365886	0.240961	70.2764
1	739.667	44.9396	5.28059	0.0722021	0.377641	0.236708	56.422
1	853.667	15.3349	4.80146	0.0833302	0.39989	0.236677	63.6989
1	890.333	12.4108	4.88743	0.0869094	0.42227	0.265951	73.1451
1	779	12.404	5.13521	0.0760416	0.388018	0.227312	76.8725
1	864	17.4331	5.05559	0.0843388	0.42639	0.256467	74.6304
1	814.333	14.345	5.03798	0.0794907	0.397772	0.254651	64.7506
1	732.333	7.31834	5.17671	0.0714863	0.369652	0.229775	81.202
1	744.667	34.7463	5.47197	0.0726902	0.391579	0.233827	61.8191
1	744.333	10.9907	4.98877	0.0726577	0.359928	0.249722	59.843
1	815	13.3499	4.99592	0.0795557	0.397046	0.244797	61.1948
1	789	11.1022	5.50804	0.0770178	0.423465	0.242936	72.7145
1	717.333	8.20575	5.58573	0.0700221	0.390711	0.243173	71.8058
1	821	11.9132	5.39326	0.0801414	0.431367	0.249137	72.8491
1	784.333	21.8721	5.19731	0.0765622	0.389009	0.234797	78.8315
1	823.333	25.0964	4.95711	0.0803692	0.397024	0.239516	68.8162
1	712	10.4195	5.26052	0.0695015	0.365222	0.226981	75.3464
1	808	17.7677	4.91487	0.0788724	0.386001	0.262056	72.9574
1	722	5.05146	5.44586	0.0704776	0.380125	0.222795	76.6919
1	860.333	14.8631	5.00323	0.0839809	0.419161	0.245053	80.2441
1	690.667	11.0716	5.33748	0.067419	0.357739	0.239053	77.6447
1	824.667	11.6838	4.94382	0.0804993	0.391536	0.262859	76.0889
1	684.333	7.92503	5.23208	0.0668008	0.349343	0.25318	54.6441
1	829.667	14.2684	5.463	0.0809874	0.440868	0.244154	77.4334
1	877.667	9.71514	4.85815	0.0856729	0.41471	0.244322	83.3206
1	804.333	6.40284	5.00101	0.0785145	0.390206	0.235421	75.499
1	886	22.5286	4.95984	0.0864864	0.42535	0.251815	80.2297
1	670	42.3342	5.47806	0.0654016	0.35437	0.224823	52.2119
1	779.333	14.3327	4.77629	0.0760742	0.36051	0.251416	58.0154
1	835.667	23.5502	5.06008	0.0815731	0.41164	0.263211	74.6831
1	698.667	11.6368	5.51762	0.0681999	0.375971	0.229009	59.2432
1	916	10.3607	4.76518	0.0894148	0.425443	0.256268	73.044
1	817	13.1429	5.32597	0.079751	0.41753	0.245512	84.6944
1	810.333	9.22729	5.17406	0.0791002	0.407074	0.230533	84.9554
1	669.667	6.42857	5.68061	0.0653691	0.373646	0.241641	70.7846
1	765	20.0121	5.4778	0.074675	0.408352	0.228825	84.551
1	625.667	12.8058	5.63899	0.0610741	0.344342	0.227701	66.7861
1	803.667	8.53329	4.85918	0.0784494	0.379691	0.250977	73.9103
1	815.333	36.1104	5.10415	0.0795883	0.403749	0.24588	65.5553
1	791.667	6.32622	5.13289	0.0772781	0.39531	0.242408	66.3358
1	810.667	10.9519	5.16476	0.0791327	0.408771	0.261558	84.2238
1	898	7.14537	4.73938	0.0876577	0.417295	0.274747	71.8339
1	720.333	10.4704	5.62187	0.0703149	0.388654	0.241575	67.1926
1	758	10.0708	5.24197	0.0739917	0.385655	0.240395	79.1424
1	789	32.9271	5.21747	0.0770178	0.400081	0.249956	64.9617
1	763	42.0835	5.19166	0.0744798	0.386717	0.237261	68.7203
1	799.333	11.4846	5.0155	0.0780264	0.389977	0.242573	75.8673
1	722	28.3142	5.68519	0.0704776	0.395806	0.242355	73.9263
1	801	8.12189	4.97888	0.0781891	0.387858	0.258727	88.1767
1	756.333	13.1204	4.92582	0.073829	0.360448	0.254446	70.5778
1	750.667	27.0771	5.46797	0.0732759	0.398222	0.221608	74.9177
1	793.333	28.8615	5.18758	0.0774408	0.39801	0.251863	67.9672
1	806.333	8.95584	4.68011	0.0787097	0.366899	0.252685	57.2386
1	762.667	10.2056	5.05447	0.0744472	0.376664	0.25576	80.5235
1	743.667	5.12865	5.2466	0.0725926	0.376027	0.245043	75.57
1	674.333	7.62652	5.41657	0.0658246	0.356257	0.22539	85.2378
1	835	9.9015	4.8934	0.081508	0.39854	0.239162	69.3631
1	708	23.1853	5.64678	0.069111	0.386929	0.223757	78.4382
1	699.333	27.0117	5.50458	0.068265	0.373987	0.229054	78.6978
1	759.333	7.71151	5.23223	0.0741219	0.387174	0.232242	72.7999
1	751.667	4.3058	5.24477	0.0733735	0.381472	0.251754	67.794
1	835.333	9.14533	5.32019	0.0815406	0.433524	0.254898	72.3289
1	646.667	19.0659	5.48796	0.063124	0.34546	0.235282	71.7469
1	881.333	9.14532	4.6692	0.0860308	0.401413	0.262408	76.6655
1	848.667	9.28439	5.30682	0.0828421	0.438579	0.256588	77.1313
1	799	18.3718	5.27917	0.0779939	0.410122	0.244429	67.894
1	767	45.8374	5.50868	0.0748702	0.411653	0.231702	68.9795
1	605	37.0622	6.34527	0.0590567	0.367276	0.221782	69.3021
1	697.333	4.72611	5.53938	0.0680698	0.372899	0.233137	73.2151
1	1009.67	15.977	4.53753	0.098558	0.446718	0.263709	69.8896
1	876.667	20.4336	4.97832	0.0855753	0.422388	0.263269	67.0808
1	961	10.6795	4.83342	0.0938074	0.453501	0.259126	74.527
1	739	7.12972	5.26307	0.072137	0.377247	0.22426	75.8177
1	865	19.2018	5.13117	0.0844365	0.430882	0.254433	74.691
1	942	20.7559	4.85452	0.0919528	0.44503	0.255809	78.3829
1	794	19.1703	5.01794	0.0775058	0.388082	0.243641	69.8175
1	840	11.4289	4.95916	0.0819961	0.403333	0.251112	75.072
1	856.667	13.4461	4.81737	0.083623	0.402524	0.25384	72.2015
1	855.667	10.7505	4.92064	0.0835254	0.410546	0.251264	80.3577
1	790	16.8559	5.27491	0.0771154	0.405394	0.243117	72.6135
1	812.333	27.2264	4.95799	0.0792954	0.39076	0.246732	74.4725
1	831.333	34.6882	5.00512	0.0811501	0.404699	0.24372	69.8095
1	726.667	12.6111	5.37013	0.0709331	0.377353	0.243232	80.1376
1	719	11.5823	5.52639	0.0701848	0.385807	0.217125	84.1721
1	804.333	12.9629	5.11884	0.0785145	0.397873	0.253255	83.0517
1	766.333	7.97965	5.02805	0.0748052	0.374881	0.229907	73.0571
1	841	35.6863	5.23408	0.0820937	0.426999	0.262342	71.756
1	834	22.7731	5.05293	0.0814104	0.409763	0.248901	76.4465
1	741	7.16366	5.68762	0.0723323	0.408222	0.234549	84.909
1	881	15.544	4.80248	0.0859983	0.408637	0.258953	80.954
1	890.333	16.4303	4.92587	0.0869094	0.426082	0.245687	68.101
1	788	30.2824	5.33762	0.0769201	0.408714	0.240413	62.2097
1	791.667	12.1849	5.71113	0.0772781	0.434351	0.24065	77.8385
1	800	9.40208	5.20642	0.0780915	0.400238	0.237543	64.4807
1	763.333	8.64574	5.40608	0.0745123	0.401594	0.236974	81.4003
1	814	34.063	5.20078	0.0794581	0.412542	0.248076	63.5161
1	819.667	16.6604	5.07477	0.0800113	0.405609	0.240902	74.5718
1	718.333	15.0032	5.07703	0.0701197	0.354417	0.226718	48.0265
1	748.667	10.9051	5.4183	0.0730806	0.393214	0.246959	84.5896
1	785.333	53.5108	5.15896	0.0766598	0.394969	0.238021	65.6528
1	743.333	8.80835	5.13709	0.07256	0.370965	0.234399	81.1054
1	764.333	15.1361	5.01293	0.0746099	0.372433	0.247798	73.7724
1	675.667	11.3203	5.63596	0.0659548	0.370884	0.235371	66.0221
1	690.333	18.0844	5.93606	0.0673865	0.39764	0.226335	84.672
1	781.333	45.0992	5.54519	0.0762694	0.42219	0.242118	79.1886
1	913	11.1771	5.19454	0.0891219	0.461169	0.2476	84.0694
1	841	21.1293	4.99491	0.0820937	0.409329	0.248358	80.1477
1	760	11.0395	5.36589	0.0741869	0.39422	0.245663	66.1589
1	881.667	17.4759	4.76231	0.0860634	0.408108	0.25463	79.7745
1	895.333	10.5169	4.94804	0.0873974	0.427612	0.244005	69.7444
1	814.333	21.5341	5.23336	0.0794907	0.411644	0.252828	82.4007
1	785.667	16.4859	5.18921	0.0766924	0.395801	0.251642	57.5815
1	859.333	49.4386	5.23085	0.0838833	0.434935	0.266006	65.9677
1	726.667	12.4663	5.41612	0.0709331	0.379783	0.244834	80.155
1	856.667	9.47969	4.98608	0.083623	0.416721	0.272194	76.9857
1	753.667	12.6457	5.24287	0.0735687	0.38302	0.225503	69.4855
1	746.667	15.236	5.27172	0.0728854	0.383052	0.240637	80.4771
1	886.667	14.7164	5.08077	0.0865514	0.437749	0.257143	80.3437
1	862.333	10.0257	4.69095	0.0841762	0.394798	0.257875	66.2132
1	933.667	10.3362	4.86792	0.0911393	0.443284	0.245697	68.3708
1	853	8.1791	5.02306	0.0832651	0.411677	0.258815	81.3155
1	873	7.89313	4.63636	0.0852174	0.393992	0.252459	61.282
1	831.667	21.1751	5.36172	0.0811826	0.43099	0.225734	81.3357
1	649.333	31.8274	5.72777	0.0633843	0.361621	0.219511	67.8505
1	684.333	6.59268	5.3325	0.0668008	0.353178	0.231726	76.9627
1	899.667	15.4137	4.74758	0.0878204	0.414846	0.254241	63.5036
1	908.667	10.2562	4.81879	0.088699	0.425839	0.257887	78.9622
1	809.667	51.281	5.42866	0.0790351	0.42541	0.231866	66.0438
1	833	15.0694	5.1725	0.0813128	0.419734	0.247566	82.6685
1	849	14.9051	5.23012	0.0828746	0.432274	0.244689	66.2761
1	768.333	41.4364	5.33802	0.0750004	0.400426	0.246474	69.4796
1	882	26.8675	5.29155	0.0860959	0.452882	0.24244	77.9635
1	869.333	30.36	4.83993	0.0848595	0.408175	0.253587	65.4323
1	656.667	17.63	5.3714	0.0641001	0.341116	0.219608	67.5119
1	764	5.03367	5.07475	0.0745774	0.377175	0.249371	75.4826
1	641.667	18.5238	5.74537	0.0626359	0.357685	0.223375	67.8306
1	758.333	17.1721	5.18181	0.0740243	0.383542	0.246085	84.5904
1	801	19.38	5.10763	0.0781891	0.396623	0.233478	72.962
1	753.333	12.186	5.20496	0.0735362	0.379474	0.24979	60.6038
1	795	26.8587	5.51663	0.0776034	0.421759	0.252594	62.8494
1	749.667	8.56529	5.20383	0.0731783	0.37632	0.258151	78.6691
1	739	12.2722	5.3697	0.072137	0.386615	0.225491	85.0571
1	892.333	9.31144	4.92329	0.0871046	0.428104	0.238038	74.4362
1	634	9.24504	5.90913	0.0618875	0.365732	0.216121	69.4026
1	812.333	9.05808	5.3079	0.0792954	0.417597	0.236877	83.1485
1	748.667	10.8696	5.58683	0.0730806	0.40747	0.228167	81.1012
1	788.333	17.5312	5.23586	0.0769527	0.402414	0.236902	78.4263
1	878	18.9618	5.04171	0.0857054	0.431862	0.253529	86.1809
1	953	17.2303	5.21393	0.0930265	0.479058	0.250599	77.9182
1	828	6.31718	4.64102	0.0808247	0.375075	0.27752	62.71
1	733	13.4994	5.08663	0.0715514	0.362428	0.215353	71.9371
1	881.333	18.529	5.12966	0.0860308	0.438044	0.246047	76.1711
1	862	15.2152	4.87236	0.0841436	0.408515	0.254569	74.8213
1	821	29.0932	5.11496	0.0801414	0.408404	0.255604	73.0275
1	840	10.6605	4.83296	0.0819961	0.394512	0.256941	67.4511
1	913	12.4206	4.71888	0.0891219	0.420316	0.26252	81.4403
1	849.333	13.1853	5.25407	0.0829072	0.430329	0.220992	62.6066
1	681.333	28.6141	5.90997	0.0665079	0.387828	0.248624	77.8081
1	726	9.29824	5.8923	0.0708681	0.409758	0.227651	75.163
1	822.333	8.02226	4.83428	0.0802716	0.384468	0.255406	78.4146
1	787.333	19.6692	4.95735	0.0768551	0.37919	0.243835	74.9493
1	673	15.8232	5.60949	0.0656945	0.364349	0.216787	69.088
1	778.333	9.44759	5.24427	0.0759765	0.394073	0.222481	67.905
1	908.333	24.4026	4.53564	0.0886664	0.400531	0.267717	79.8667
1	779.667	18.5407	4.98377	0.0761067	0.376852	0.247479	69.3212
1	871	51.8507	4.81738	0.0850221	0.410462	0.267754	65.8103
1	826	7.60342	4.97022	0.0806295	0.399449	0.23749	66.4863
1	790	10.5096	5.2017	0.0771154	0.392079	0.258203	70.0553
1	884.667	22.4436	5.07726	0.0863562	0.438474	0.260991	69.1555
1	923.333	19.8529	5.16261	0.0901306	0.462028	0.256884	80.4478
1	728	7.70043	5.31203	0.0710633	0.375558	0.249609	66.1094
1	888.333	19.3835	4.76675	0.0867141	0.411138	0.264212	80.7205
1	742	21.1902	5.19346	0.0724299	0.375462	0.25647	54.1233
1	718.333	10.4206	5.79131	0.0701197	0.402173	0.234544	78.994
1	771.333	12.7271	5.25932	0.0752932	0.391242	0.240566	75.5892
1	831	25.8807	5.03288	0.0811176	0.406859	0.251714	68.8541
1	812.667	9.60663	5.1758	0.079328	0.409945	0.244568	61.958
1	812.667	17.0593	4.95427	0.079328	0.391808	0.250601	82.2446
1	754.667	9.24223	5.09969	0.0736663	0.376145	0.265169	61.8716
1	685	35.5507	5.27544	0.0668659	0.349311	0.24055	61.2353
1	792	19.7178	5.29196	0.0773106	0.404179	0.246411	69.8853
1	714	23.8868	5.64175	0.0696967	0.388726	0.239019	84.5293
1	707.667	21.0227	6.07661	0.0690785	0.41129	0.228934	71.3244
1	828	8.86097	4.94666	0.0808247	0.399644	0.271242	61.9575
1	702	26.4133	5.2068	0.0685253	0.355339	0.240558	67.2671
1	704	13.1535	5.57312	0.0687205	0.371212	0.234486	71.6202
1	746	10.3263	5.03563	0.0728203	0.36591	0.231131	70.8016
1	824	38.9879	5.22442	0.0804343	0.416712	0.252692	70.2972
1	636.333	15.6483	5.44637	0.0621153	0.338875	0.240655	79.6182
1	760.667	36.0406	5.41211	0.074252	0.401662	0.240586	62.6021
1	684.667	35.7237	5.48235	0.0668333	0.365395	0.241038	58.8714
1	839.333	6.88565	4.84668	0.081931	0.395813	0.241724	66.6494
1	851.667	26.7433	5.39945	0.0831349	0.448772	0.243996	65.2165
1	848.333	15.8728	4.79107	0.0828095	0.395683	0.248963	66.0688
1	800	13.0278	5.18806	0.0780915	0.401985	0.250366	67.3371
1	756.667	8.8036	4.94309	0.0738616	0.363553	0.236626	51.8853
1	873	22.2652	5.0141	0.0852174	0.42299	0.266919	69.5087
1	846	22.5574	5.04602	0.0825818	0.415259	0.25389	82.1326
1	743.667	9.86325	5.26539	0.0725926	0.381692	0.22342	68.1929
1	886.667	23.5082	4.90268	0.0865514	0.421557	0.252528	74.3008
1	740	23.6941	5.50092	0.0722347	0.392285	0.243105	74.8266
1	944.333	21.6866	4.71634	0.0921805	0.431093	0.251905	84.783
1	664	6.99005	5.66901	0.064816	0.366968	0.23903	59.327
1	826.333	13.1975	5.43424	0.080662	0.429709	0.249451	69.8634
1	815.333	13.8265	4.94021	0.0795883	0.393207	0.248477	79.1205
1	629	20.0768	5.89555	0.0613995	0.361185	0.220763	77.5354
1	797.333	30.709	5.35387	0.0778312	0.417331	0.265644	64.5929
1	930.333	23.764	4.59121	0.0908139	0.416211	0.261814	84.883
1	842	7.95468	4.95669	0.0821913	0.406879	0.251341	81.5513
1	772.333	10.3068	4.74717	0.0753909	0.35753	0.249455	80.5639
1	725.667	7.11899	5.09558	0.0708355	0.356915	0.241982	84.489
1	930	39.9411	5.0369	0.0907814	0.45578	0.246527	77.2374
1	619.667	16.3541	5.47115	0.0604884	0.331765	0.233687	54.9067
1	824.333	17.2759	5.04873	0.0804668	0.405752	0.260125	79.989
1	758	7.78918	5.28801	0.0739917	0.389634	0.236045	86.6816
1	785.667	4.55047	5.11467	0.0766924	0.390776	0.242755	76.145
1	890	9.95538	4.71418	0.0868768	0.408767	0.254911	72.2781
1	703.333	20.81	6.15716	0.0686555	0.417065	0.240966	67.9997
1	703	17.8301	5.83697	0.0686229	0.400191	0.241228	75
1	856	12.7594	4.87794	0.0835579	0.406633	0.240149	60.8307
1	865.333	6.33632	5.17254	0.084469	0.431637	0.248525	68.7719
1	763.333	17.6536	5.37817	0.0745123	0.396139	0.255511	73.8803
1	896	18.9319	4.8831	0.0874625	0.42363	0.240492	67.6108
1	866	9.11328	4.79646	0.0845341	0.404283	0.255359	66.2406
1	738.333	13.2226	5.29024	0.072072	0.379239	0.236358	59.5285
1	792	29.0873	5.40035	0.0773106	0.417815	0.247253	68.1465
1	670	11.8086	5.35667	0.0654016	0.350009	0.227893	68.2561
1	729.333	13.9664	5.61537	0.0711934	0.399591	0.230095	72.1532
1	807.333	16.4499	4.97638	0.0788074	0.392194	0.265841	86.491
1	826	16.1183	5.07906	0.0806295	0.408657	0.240745	76.6428
1	803.333	18.709	5.24026	0.0784169	0.410224	0.250354	66.3479
1	831.333	26.433	5.10154	0.0811501	0.413607	0.253587	80.772
1	1011.33	39.0959	4.5807	0.0987207	0.452269	0.280504	68.592
1	918	23.1775	4.75732	0.08961	0.425681	0.248105	75.7515
1	833.667	9.4165	4.95561	0.0813779	0.402176	0.24925	83.5898
1	795.333	17.9185	5.13916	0.077636	0.397401	0.221068	59.8322
1	696.333	9.46854	5.58018	0.0679722	0.377829	0.231983	71.381
1	937	18.5738	4.65891	0.0914647	0.425058	0.269168	68.438
1	816	15.8783	5.0566	0.0796534	0.40059	0.233659	72.7849
1	792.333	9.92079	4.77841	0.0773431	0.367637	0.253658	58.0462
1	683.667	14.3083	5.54122	0.0667357	0.36922	0.234227	76.7061
1	820.333	10.1785	5.03336	0.0800763	0.402855	0.243587	64.0652
1	819.667	14.7074	4.90355	0.0800113	0.392479	0.245239	75.6415
1	748	11.149	5.25219	0.0730156	0.37937	0.237314	60.5436
1	805.667	11.6349	5.18512	0.0786447	0.405935	0.253932	65.9627
1	757.333	20.572	5.20874	0.0739266	0.383442	0.270081	70.3954
1	838	21.0692	5.09544	0.0818009	0.415004	0.248645	78.8555
1	673	6.45074	5.92737	0.0656945	0.386753	0.249481	81.6845
1	703.333	22.0651	5.70201	0.0686555	0.389574	0.239146	70.716
1	657.667	21.2019	5.17907	0.0641977	0.33101	0.249661	65.6279
1	880.333	23.9738	5.29794	0.0859332	0.452928	0.25427	80.7979
1	749.333	10.2775	5.17684	0.0731457	0.377768	0.241552	67.1639
1	680.667	35.8963	5.36891	0.0664429	0.356738	0.234423	55.6335
1	723	8.55689	5.23208	0.0705752	0.368647	0.225727	75.1743
1	678	27.6477	5.58373	0.0661826	0.366607	0.211366	76.9377
1	690.667	45.0261	5.42662	0.067419	0.362725	0.247784	77.4116
1	892.333	21.2467	4.95854	0.0871046	0.431618	0.262995	69.2336
1	682	20.8358	5.35292	0.066573	0.355071	0.242363	62.6599
1	656.667	8.19646	5.67531	0.0641001	0.363964	0.233773	76.0962
1	865.667	43.3032	4.91792	0.0845015	0.413835	0.251686	64.0439
1	852.667	17.2886	5.16175	0.0832325	0.428654	0.240347	74.5937
1	777.333	30.4003	5.36249	0.0758789	0.407009	0.235447	80.5402
1	803	9.70309	4.84466	0.0783844	0.37854	0.242327	71.2758
1	948	15.8652	4.60619	0.0925385	0.425985	0.267428	80.964
1	840.333	30.4849	5.09694	0.0820286	0.417699	0.247538	79.8025
1	709.333	7.41514	5.38979	0.0692411	0.371449	0.233848	67.6956
1	758	14.6429	5.1716	0.0739917	0.377569	0.25155	72.9032
1	794	8.55336	4.95652	0.0775058	0.384008	0.256636	64.105
1	930.667	9.60808	4.72727	0.0908465	0.422966	0.27361	65.6854
1	846	13.7183	4.81	0.0825818	0.396151	0.268697	78.9385
1	843	19.2044	5.38555	0.0822889	0.443108	0.241432	76.1352
1	750.667	6.24026	5.1127	0.0732759	0.373079	0.226593	80.4278
1	832	18.1004	5.14224	0.0812152	0.41701	0.246045	78.8257
1	686.667	6.56807	5.30362	0.0670286	0.352294	0.243308	74.9272
1	822	13.6563	5.24303	0.080239	0.418856	0.253773	79.1719
1	597	7.46869	6.09459	0.0582758	0.357623	0.21773	84.0258
1	804.333	19.8299	5.38263	0.0785145	0.422088	0.252964	81.0219
1	852	7.63779	4.88635	0.0831675	0.406391	0.250431	88.0658
1	770.333	13.7226	5.24268	0.0751956	0.393711	0.242829	75.5617
1	884	11.5548	4.83561	0.0862911	0.415965	0.261956	77.9871
1	739.333	12.0933	5.4112	0.0721696	0.387699	0.236876	82.367
1	775	29.0704	4.99896	0.0756512	0.374586	0.261672	68.7012
1	717	11.5296	5.47696	0.0699895	0.383219	0.231682	79.8367
1	782.333	23.5548	4.95982	0.076367	0.378349	0.249241	66.7688
1	842	25.2326	5.03106	0.0821913	0.408351	0.242691	83.1015
1	712.333	23.4385	5.54339	0.069534	0.385519	0.230608	67.7053
1	759.333	10.5312	5.52212	0.0741219	0.403366	0.243042	72.3448
1	1009.33	24.7189	4.64638	0.0985255	0.457004	0.280969	75.0168
1	715.333	5.29708	5.11322	0.0698268	0.354673	0.251399	67.1345
1	691	27.0411	5.28942	0.0674516	0.356411	0.238278	74.3812
1	754	29.1835	5.37168	0.0736013	0.394199	0.234423	72.6789
1	864.333	9.91134	5.17025	0.0843714	0.430698	0.25493	76.4615
1	772.667	16.1827	5.48361	0.0754234	0.412086	0.246724	80.9172
1	942.333	8.04702	4.75847	0.0919853	0.431322	0.253587	73.3879
1	731.333	16.9921	5.51389	0.0713887	0.391357	0.244024	65.8194
1	629.667	7.94529	5.73671	0.0614645	0.351046	0.243132	70.0495
1	708	16.356	5.37139	0.069111	0.370892	0.233423	72.4693
1	882.333	11.1357	4.95425	0.0861284	0.426335	0.249591	79.55
1	803.333	10.3107	4.90949	0.0784169	0.378445	0.257649	65.1888
1	923.667	10.0863	5.38523	0.0901632	0.474823	0.271071	76.0467
1	761.333	26.1048	5.29884	0.0743171	0.393319	0.233208	69.8399
1	868.333	29.3028	5.03139	0.0847618	0.423719	0.25588	73.8294
1	976	26.1025	5.11787	0.0952717	0.486421	0.267435	70.4236
1	813	11.3388	4.90901	0.0793605	0.3893	0.250633	71.8393
1	831.333	14.6812	5.14252	0.0811501	0.414442	0.237406	64.4981
1	842.333	17.3039	4.90381	0.0822239	0.402278	0.257517	79.438
1	730.667	10.6725	5.17565	0.0713236	0.366743	0.244654	65.79
1	947.667	19.8356	4.96471	0.0925059	0.459041	0.251944	72.3349
1	852.333	23.6628	5.01427	0.0832	0.415782	0.253591	70.435
1	915	51.8548	4.54373	0.0893172	0.404299	0.272774	72.9036
1	694.667	21.3919	5.67962	0.0678095	0.384933	0.224538	68.5381
1	929.667	13.308	4.8176	0.0907489	0.433642	0.276972	77.6473
1	622	10.7607	5.67936	0.0607162	0.344904	0.229485	69.853
1	962.667	23.4041	5.19689	0.0939701	0.481477	0.241463	75.6505
1	915.667	9.62625	4.81412	0.0893823	0.428765	0.25797	83.4886
1	936	20.8579	4.74555	0.0913671	0.432206	0.266481	76.9874
1	1076.33	12.4638	4.43726	0.105066	0.46481	0.27456	82.461
1	910.333	11.1254	4.78468	0.0888616	0.423456	0.263026	72.8759
1	1031.67	14.5799	4.37317	0.100706	0.439925	0.272208	74.0387
1	700.667	25.0932	5.17282	0.0683952	0.349905	0.238448	57.5397
1	780.667	7.44078	4.98707	0.0762043	0.379462	0.251869	69.8668
1	784	7.92243	5.29902	0.0765297	0.403082	0.24569	77.7648
1	814.333	15.5516	4.69528	0.0794907	0.371042	0.252193	69.305
1	770.667	9.1434	5.33325	0.0752282	0.400303	0.251154	70.3425
1	699	12.6864	5.66151	0.0682325	0.385396	0.24255	72.0662
1	715	52.6002	5.11847	0.0697943	0.354002	0.245055	71.6623
1	764.667	11.3842	5.53943	0.0746425	0.412385	0.236246	71.9919
1	701.333	9.47399	5.20462	0.0684602	0.35339	0.234142	76.9206
1	752	13.9044	5.25107	0.073406	0.383666	0.244136	79.0713
1	849.333	11.5457	5.10758	0.0829072	0.418258	0.253747	72.4548
1	747.667	12.6651	5.07638	0.072983	0.370054	0.226714	85.0458
1	813.333	18.2964	5.25081	0.079393	0.414643	0.237216	78.0585
1	750	9.51858	5.03179	0.0732108	0.367588	0.236451	75.4751
1	706	11.6202	5.41809	0.0689158	0.372887	0.231882	75.2377
1	587	34.6342	6.5445	0.0572997	0.374848	0.23873	64.838
1	722.667	16.3894	5.4285	0.0705427	0.381374	0.224376	73.0937
1	763.333	6.79805	5.66779	0.0745123	0.416126	0.256122	71.6892
1	1067.67	50.5107	4.49303	0.10422	0.467145	0.279031	67.743
1	778.333	6.95433	5.35777	0.0759765	0.403053	0.223947	81.412
1	716.667	22.2091	5.44993	0.069957	0.380764	0.247893	74.5545
1	817.667	7.41458	4.94868	0.079816	0.393341	0.250064	67.9825
1	892	15.7072	4.80794	0.087072	0.416603	0.283809	57.0965
1	593	19.0621	6.08784	0.0578853	0.350125	0.188529	71.5377
1	724.667	35.2519	5.49778	0.0707379	0.388112	0.216827	68.6631
1	907.333	14.3695	4.92101	0.0885688	0.43424	0.237757	75.9502
1	928	57.7717	4.94104	0.0905862	0.443876	0.257407	63.9918
1	717	29.9457	5.49189	0.0699895	0.381899	0.219314	84.0333
1	802.333	15.5985	5.56659	0.0783193	0.433623	0.247549	68.9807
1	794.333	8.42885	5.15047	0.0775384	0.399473	0.245017	77.2089
1	823.333	11.4272	4.99192	0.0803692	0.398853	0.250293	79.913
1	781.333	17.194	4.93056	0.0762694	0.374451	0.26609	74.5908
1	767.667	29.0215	5.31524	0.0749353	0.395761	0.248305	59.8391
1	725.333	11.7669	5.3305	0.070803	0.376013	0.213044	82.2981
1	831	24.1583	5.35507	0.0811176	0.434307	0.246752	78.7119
1	1046	13.9277	4.312	0.102105	0.438144	0.271891	70.1515
1	779.333	19.2798	5.41603	0.0760742	0.408001	0.245116	70.3398
1	792	16.0198	5.56142	0.0773106	0.429515	0.250744	77.9508
1	870.333	21.1756	4.91379	0.0849571	0.415656	0.27127	78.3637
1	818.333	9.33002	5.34905	0.0798811	0.424023	0.234001	74.6106
1	873	15.0937	5.07278	0.0852174	0.428162	0.249504	77.504
1	688.667	5.48905	5.20874	0.0672238	0.350157	0.234742	79.1731
1	839.333	25.2334	5.14343	0.081931	0.421302	0.250515	78.1564
1	724	7.60218	5.5806	0.0706728	0.393825	0.241987	65.0121
1	828	16.1744	4.97084	0.0808247	0.400825	0.245281	75.3072
1	763	39.7765	5.22165	0.0744798	0.388763	0.238976	60.8065
1	751	12.4088	5.31837	0.0733084	0.386092	0.238045	79.9879
1	951	11.0504	4.68666	0.0928313	0.434533	0.265198	79.4108
1	717.667	17.0272	5.03959	0.0700546	0.352965	0.237344	73.8279
1	915	7.93457	4.58103	0.0893172	0.406528	0.263171	54.3475
1	744.333	12.8693	5.1487	0.0726577	0.372668	0.23814	77.9905
1	730.667	21.258	5.27788	0.0713236	0.376231	0.252962	77.9546
1	850.667	9.25588	4.74927	0.0830373	0.393377	0.256123	64.8043
1	780.333	8.79687	5.28662	0.0761718	0.402261	0.235674	82.3291
1	791.333	30.2362	5.1687	0.0772455	0.398055	0.249123	73.4894
1	838	5.74999	4.67846	0.0818009	0.382621	0.271899	73.4897
1	724	17.2188	5.48735	0.0706728	0.38184	0.228625	69.1665
1	776	21.5195	4.97908	0.0757488	0.376494	0.250502	64.4113
1	797	9.66759	5.1486	0.0777987	0.395321	0.249157	67.0784
1	885	16.2473	4.9818	0.0863887	0.429461	0.248	77.289
1	960.333	27.4761	4.56481	0.0937424	0.426817	0.276993	76.4089
1	736	6.98405	5.08458	0.0718442	0.365033	0.260019	75.3683
1	759	9.19042	5.06047	0.0740893	0.374887	0.258587	75.7071
1	937.333	12.2815	4.49379	0.0914972	0.409701	0.260486	82.6882
1	780	26.5379	5.06947	0.0761392	0.384655	0.258292	54.8498
1	772	17.1332	5.70088	0.0753583	0.427469	0.236727	82.2797
1	930	18.4328	4.72517	0.0907814	0.427687	0.273047	70.6928
1	763.667	13.952	5.33906	0.0745449	0.392876	0.234022	69.7649
1	693	23.2447	5.2895	0.0676468	0.353986	0.228218	80.3443
1	815	42.9784	5.35797	0.0795557	0.423	0.22814	71.2426
1	806	45.8416	4.94381	0.0786772	0.387396	0.249091	50.9862
1	818	14.0512	5.33832	0.0798486	0.420864	0.237788	83.1618
1	764.667	12.0669	5.01489	0.0746425	0.373847	0.243785	75.5255
1	783.667	15.1348	5.4257	0.0764972	0.414082	0.238981	83.5643
1	704.333	18.0941	5.61943	0.0687531	0.385046	0.238999	69.837
1	782.333	36.2832	5.49308	0.076367	0.416326	0.224324	79.8611
1	867.667	10.1103	4.81254	0.0846968	0.40599	0.256516	77.1336
1	778.333	10.3376	5.30783	0.0759765	0.399337	0.231952	80.3684
1	1050.33	14.9624	4.6571	0.102528	0.473903	0.278979	75.9191
1	760.333	8.87787	5.55094	0.0742195	0.407147	0.232601	83.0193
1	852	23.2808	5.02061	0.0831675	0.41751	0.240413	72.9488
1	907.333	18.0126	4.77424	0.0885688	0.422358	0.240762	78.3379
1	799.667	10.369	5.08734	0.078059	0.395279	0.251059	68.1959
1	830.333	11.9652	5.09389	0.0810525	0.411248	0.233534	71.6784
1	654	5.30065	5.25556	0.0638398	0.334069	0.244559	74.8567
1	925.667	10.4959	4.80491	0.0903584	0.433616	0.257887	82.7097
1	829.667	24.7126	5.14161	0.0809874	0.415053	0.2398	72.8617
1	713	12.1845	6.08856	0.0695991	0.41907	0.227224	74.1453
1	853.667	23.6272	5.4045	0.0833302	0.444739	0.253599	70.9822
1	755.333	7.72308	5.30591	0.0737314	0.388668	0.22833	69.7124
1	696.333	12.0275	5.43898	0.0679722	0.368504	0.249246	66.932
1	811	9.24581	5.19216	0.0791653	0.409952	0.23318	72.6335
1	814.333	19.938	5.27696	0.0794907	0.417135	0.255552	74.3802
1	924.333	8.79556	4.62875	0.0902282	0.415617	0.253861	83.9767
1	712.333	20.9157	6.23639	0.069534	0.432374	0.2258	80.1125
1	743	44.0066	5.4468	0.0725275	0.394673	0.226557	74.9504
1	702.667	45.8969	5.81931	0.0685904	0.399047	0.225719	73.0528
1	780.333	15.3769	5.38823	0.0761718	0.405216	0.235015	70.3429
1	753	4.32106	5.06323	0.0735036	0.367163	0.259199	73.8855
1	691.333	5.72893	5.7153	0.0674841	0.380124	0.227379	81.9365
1	1043	12.0581	4.36428	0.101812	0.441568	0.265889	66.4875
1	639.333	23.4795	5.7772	0.0624081	0.359528	0.221285	68.9786
1	792.667	7.54364	4.90318	0.0773757	0.377005	0.249068	81.294
1	819.333	8.44957	4.915	0.0799787	0.389902	0.264601	70.6568
1	757	6.93973	5.25638	0.0738941	0.38816	0.237985	78.3326
1	776.667	8.35221	4.96253	0.0758138	0.375302	0.254594	62.3022
1	728	31.58	5.24515	0.0710633	0.371903	0.232489	83.2855
1	816	26.2059	5.18749	0.0796534	0.410133	0.24814	82.4239
1	864.667	26.3525	4.97316	0.0844039	0.417918	0.230907	78.9586
1	729.667	15.3516	5.47823	0.071226	0.390203	0.238329	58.2081
1	683.667	11.8996	5.21494	0.0667357	0.34798	0.234809	74.7613
1	684	11.2625	5.59289	0.0667682	0.37043	0.218668	82.4296
1	865.667	18.9331	4.92843	0.0845015	0.413596	0.247482	74.6315
1	708.667	16.1032	5.56548	0.0691761	0.384014	0.224664	83.0636
1	849	42.1814	4.87376	0.0828746	0.403403	0.262403	64.2384
1	867.333	9.85895	4.77797	0.0846642	0.402925	0.25688	68.6084
1	898.333	25.319	4.65688	0.0876903	0.406872	0.260057	83.8531
1	886	11.3167	4.77693	0.0864864	0.412157	0.253317	79.5218
1	898.333	7.05931	4.57163	0.0876903	0.399612	0.256485	76.238
1	856	18.4731	4.97047	0.0835579	0.412672	0.260842	80.6224
1	702.333	23.008	5.52565	0.0685578	0.375588	0.231324	76.1371
1	822.333	9.74303	5.03455	0.0802716	0.402433	0.246897	79.4985
1	1004	28.4432	4.56298	0.0980049	0.444145	0.267886	64.2947
1	841.667	13.13	5.01198	0.0821588	0.41201	0.259511	74.7949
1	791.333	9.95918	4.99959	0.0772455	0.385866	0.24924	67.0995
1	812.333	8.71323	4.91299	0.0792954	0.387266	0.24623	79.7372
1	759.667	7.41278	5.22356	0.0741544	0.385363	0.2189	80.4428
1	758	19.8074	6.39389	0.0739917	0.446905	0.235627	72.9981
1	772.333	13.3672	5.34704	0.0753909	0.40263	0.236362	80.4508
1	706.333	29.5206	5.85496	0.0689483	0.402482	0.245741	66.7913
1	966.333	26.6634	4.64205	0.094328	0.437426	0.268161	65.6919
1	747	9.72498	5.45158	0.072918	0.393864	0.249426	75.594
1	798	11.8574	5.02699	0.0778963	0.388864	0.239803	79.8096
1	795.667	13.4937	5.89293	0.0776685	0.457435	0.246556	75.9934
1	856	5.65541	5.1083	0.0835579	0.423994	0.239553	77.7334
1	740	6.21647	5.16574	0.0722347	0.372632	0.242036	72.5085

## Sheet: Col_nAT_D
Predicate	Pixel count	SSE	LS Ratio	Surface	Length	Width	Axes angle
1	675	19.9278	5.78399	0.0658897	0.377252	0.200217	78.9168
1	573.5	6.06622	5.72673	0.0559819	0.319466	0.197097	61.5176
1	476.5	11.6353	6.20153	0.0465133	0.28759	0.192797	63.5302
1	651.5	9.56524	5.38852	0.0635958	0.341297	0.202858	83.6378
1	625	46.3509	5.59478	0.061009	0.340526	0.202988	56.8642
1	519.5	6.29778	5.93287	0.0507107	0.300732	0.182787	78.0137
1	630	8.132	5.61006	0.0614971	0.344926	0.202443	82.37
1	808	5.51004	4.88026	0.0788724	0.383221	0.224989	75.7613
1	1025.5	7.56215	4.42502	0.100104	0.442558	0.260256	81.6429
1	741	8.96383	5.73817	0.0723323	0.413035	0.209537	81.3863
1	960.5	6.40275	4.54096	0.0937586	0.427681	0.297165	67.4532
1	840.5	14.3621	4.98925	0.0820449	0.410214	0.248571	64.1267
1	651	19.8625	5.50676	0.063547	0.35	0.210151	86.2655
1	642	12.3634	5.90973	0.0626684	0.36949	0.203625	75.6283
1	580	9.13306	5.48821	0.0566164	0.310215	0.200967	80.0724
1	490	11.3964	6.47776	0.0478311	0.309499	0.180133	80.0017
1	758	9.2247	5.13234	0.0739917	0.376921	0.236765	83.8956
1	868.5	17.6373	5.24686	0.0847781	0.44356	0.244191	79.1485
1	845.5	11.371	4.54741	0.082533	0.375326	0.250507	72.7457
1	627.5	6.82898	5.28015	0.061253	0.32333	0.20748	83.6789
1	633	5.88225	5.45935	0.0617899	0.33729	0.202109	78.1417
1	736	39.6488	5.2388	0.0718442	0.375215	0.23218	64.8474
1	870	26.0045	4.87393	0.0849245	0.413897	0.241021	62.5908
1	931	32.5619	4.6648	0.090879	0.422358	0.276432	79.5314
1	931	21.9353	4.3941	0.090879	0.393598	0.267909	65.0509
1	481	11.4525	6.48226	0.0469525	0.298719	0.19002	80.8717
1	547.5	23.9761	5.74257	0.0534439	0.303781	0.188189	55.6632
1	632	5.59451	5.66978	0.0616923	0.346864	0.212478	85.0932
1	893	4.54387	4.68535	0.0871697	0.408379	0.23712	79.6952
1	555	9.53172	6.24553	0.054176	0.336711	0.193964	79.3271
1	508.5	10.2648	6.06967	0.0496369	0.300784	0.195048	72.1028
1	965	10.2387	4.54441	0.0941979	0.428374	0.272465	77.7449
1	756.5	16.9652	5.36223	0.0738453	0.395927	0.226338	79.1597
1	638.5	9.29752	5.48314	0.0623268	0.338198	0.21242	74.1623
1	965	12.4289	4.56323	0.0941979	0.426749	0.267406	81.0338
1	758	12.5851	5.21164	0.0739917	0.384474	0.222829	79.4992
1	1022.5	17.2765	4.32019	0.0998107	0.429163	0.278399	70.0156
1	701	8.3917	5.69601	0.0684277	0.389646	0.199443	82.3724
1	682	25.4419	5.85118	0.066573	0.387262	0.207397	83.7356
1	811.5	14.4999	4.74049	0.0792141	0.375187	0.234346	76.9906
1	1098.5	11.401	4.23083	0.107229	0.452641	0.280348	79.4812
1	613.5	28.6423	5.92427	0.0598864	0.353707	0.199949	79.1708
1	549.5	8.45724	5.90437	0.0536391	0.316097	0.201621	78.6483
1	1011.5	17.1513	4.35581	0.098737	0.428297	0.292259	72.4695
1	642	9.88005	5.28556	0.0626684	0.331238	0.20748	83.991
1	463	57.7463	7.11358	0.0451955	0.320461	0.170253	33.3898
1	1227	17.754	4.20316	0.119773	0.503238	0.287201	79.4927
1	778	14.3843	4.92817	0.075944	0.374048	0.23712	72.9282
1	577	5.74459	5.96329	0.0563235	0.334305	0.194896	81.4109
1	695.5	29.5647	5.37546	0.0678908	0.364317	0.207603	66.1756
1	709	12.9558	5.46903	0.0692086	0.376603	0.210819	78.7349
1	583	16.1591	5.89389	0.0569092	0.329311	0.200837	51.9645
1	771	18.6004	5.34924	0.0752607	0.401826	0.219065	82.8061
1	527.5	19.7952	6.02546	0.0514916	0.310945	0.206691	47.0374
1	642	11.9852	5.59989	0.0626684	0.351005	0.203502	81.1404
1	539	22.3435	6.26725	0.0526142	0.329117	0.191614	84.6027
1	625	8.81159	6.10229	0.061009	0.371284	0.194829	81.852
1	789	12.0942	4.66263	0.0770178	0.357933	0.237792	84.5902
1	796	14.3266	5.20506	0.0777011	0.403848	0.231837	75.7279
1	660	12.6218	5.34897	0.0644255	0.342481	0.242239	68.1786
1	1033.5	13.4141	4.3756	0.100884	0.439092	0.259272	69.6896
1	903.5	6.16547	4.65369	0.0881946	0.4095	0.247221	79.5748
1	814.5	10.866	4.94673	0.0795069	0.393307	0.248473	86.5058
1	807	15.2661	5.48481	0.0787748	0.431222	0.217653	81.0489
1	933.5	8.71897	4.53073	0.091123	0.413075	0.273244	87.1765
1	634	9.83335	5.27453	0.0618875	0.323677	0.215867	73.4009
1	824.5	7.08908	4.80571	0.0804831	0.386186	0.23218	80.5428
1	634.5	12.3519	6.05305	0.0619363	0.374329	0.199068	72.378
1	652.5	31.2111	5.91731	0.0636934	0.376977	0.203156	57.6112
1	563	5.33901	5.58056	0.0549569	0.305721	0.20748	79.4194
1	657	15.9198	6.002	0.0641327	0.380751	0.19207	81.3279
1	490.5	18.9971	6.25547	0.0478799	0.296811	0.187486	36.4693
1	891	8.24268	4.69974	0.0869744	0.408017	0.23712	79.6952
1	857	7.63862	4.93614	0.0836555	0.412959	0.235838	83.9634
1	818.5	20.9448	5.07878	0.0798974	0.404424	0.227912	73.8622
1	913	15.3843	4.73269	0.0891219	0.418765	0.24898	80.0278
1	643.5	12.8551	5.67319	0.0628149	0.35635	0.20748	78.9529
1	847	23.5633	4.77101	0.0826794	0.396429	0.272121	80.9877
1	612	10.0179	5.97955	0.05974	0.356639	0.214671	73.3932
1	850.5	15.2756	4.66973	0.083021	0.388386	0.270737	71.4076
1	813.5	5.69016	4.7462	0.0794093	0.37679	0.240616	81.3004
1	921.5	12.8551	4.76369	0.0899517	0.4285	0.248737	81.0818
1	684.5	13.542	5.64596	0.0668171	0.377233	0.209732	82.8627
1	600	16.3059	5.13794	0.0585686	0.301188	0.22334	66.6143
1	507	26.7254	6.35726	0.0494905	0.312408	0.183612	63.5863
1	579.5	7.88975	5.99925	0.0565675	0.339207	0.210296	56.491
1	456.5	8.61021	6.03292	0.044561	0.267734	0.186774	69.4866
1	521.5	5.04198	6.69487	0.0509059	0.337637	0.183721	82.7218
1	785.5	6.02857	5.04433	0.0766761	0.384193	0.233233	78.4775
1	1057	19.4648	4.38429	0.103178	0.450044	0.254293	69.5209
1	943	39.0352	4.63424	0.0920504	0.423096	0.262981	63.8422
1	460.5	17.9702	6.40975	0.0449514	0.288577	0.186147	72.8098
1	731.5	12.4245	5.48208	0.0714049	0.388218	0.215461	76.7423
1	501	7.73475	6.25499	0.0489048	0.302425	0.192797	77.2051
1	1037.5	19.5196	4.07216	0.101275	0.412285	0.296193	81.5395
1	909	10.6389	4.71953	0.0887315	0.413839	0.25688	81.5046
1	699.5	18.2268	5.52367	0.0682813	0.375128	0.210969	70.4095
1	1004	8.84412	4.19988	0.0980049	0.409023	0.294841	81.417
1	574	9.05502	5.52315	0.0560307	0.308393	0.19701	67.7221
1	415	4.49577	6.43307	0.04051	0.259355	0.175726	74.396
1	690	4.59302	5.20587	0.0673539	0.350276	0.212868	85.3645
1	695	15.9016	5.7365	0.067842	0.388476	0.205987	84.8744
1	785.5	21.4991	5.11431	0.0766761	0.391986	0.218804	81.9458
1	601	5.28995	5.33973	0.0586663	0.312967	0.198093	81.6965
1	957.5	26.2574	4.54368	0.0934658	0.425312	0.283153	87.4187
1	481.5	6.11631	6.05101	0.0470013	0.283487	0.173472	80.9027
1	705.5	11.7462	4.97752	0.068867	0.337569	0.245417	88.9412
1	764	7.62049	5.67369	0.0745774	0.42039	0.207221	76.9234
1	1016	10.5761	4.6268	0.0991762	0.458848	0.254676	79.6389
1	1011	18.9495	4.36236	0.0986882	0.427973	0.26676	80.1519
1	951.5	13.8647	4.31101	0.0928801	0.400452	0.255257	73.1707
1	690	4.46548	5.03367	0.0673539	0.338698	0.2223	68.1094
1	1050.5	17.0857	4.14194	0.102544	0.424668	0.295077	70.8326
1	680	19.867	5.52039	0.0663778	0.36727	0.216498	78.8151
1	712	9.44109	5.48703	0.0695015	0.379771	0.224576	67.2305
1	706.5	35.8679	6.28047	0.0689646	0.433202	0.227752	68.1227
1	751.5	7.68211	5.18229	0.0733572	0.380054	0.226899	75.882
1	1066.5	7.97922	4.43305	0.104106	0.459712	0.274275	88.3372
1	792.5	8.95546	5.2583	0.0773594	0.405311	0.222729	82.7491
1	390	7.84759	6.44214	0.0380696	0.245387	0.174957	69.3913
1	697.5	4.78579	5.23246	0.068086	0.355602	0.218793	83.1979
1	868	11.7229	4.83866	0.0847293	0.41	0.239142	76.4133
1	384.5	10.6024	6.52879	0.0375327	0.244039	0.183313	40.597
1	797.5	14.9914	4.71941	0.0778475	0.366944	0.252394	70.653
1	901.5	25.6122	4.77865	0.0879994	0.419698	0.271565	77.5652
1	883	28.2696	4.64942	0.0861935	0.399314	0.253677	80.3536
1	600	10.0675	6.08806	0.0585686	0.356586	0.199147	81.808
1	812.5	9.30728	5.20553	0.0793117	0.410878	0.242547	77.7706
1	702.5	12.2202	5.55102	0.0685741	0.37769	0.20254	84.6826
1	826.5	9.85952	4.79707	0.0806783	0.386381	0.229105	84.345
1	901.5	22.6113	4.48646	0.0879994	0.395856	0.28393	65.1107
1	616.5	5.15131	5.55257	0.0601793	0.33402	0.204991	82.2774
1	861.5	7.06072	4.54307	0.0840948	0.382038	0.234346	83.9098
1	1010	74.6277	4.47898	0.0985905	0.441584	0.278836	76.8316
1	756	15.5191	5.0249	0.0737965	0.37013	0.228299	82.277
1	804	6.71381	4.79359	0.078482	0.375674	0.248302	78.2909
1	738.5	12.0226	5.21897	0.0720882	0.375128	0.21736	77.6488
1	1073	12.6667	4.19686	0.10474	0.438805	0.284552	71.5696
1	647.5	16.0271	5.61137	0.0632053	0.354	0.203809	80.6906
1	831.5	5.48306	4.58918	0.0811664	0.372385	0.248737	80.0084
1	692.5	10.8246	5.29812	0.067598	0.357495	0.21242	79.3513
1	823	7.08466	5.04431	0.0803367	0.402878	0.238691	81.606
1	627.5	12.8206	5.44689	0.061253	0.333122	0.199595	83.1262
1	715.5	39.3531	5.29447	0.0698431	0.369145	0.239453	54.5948
1	776.5	17.8665	5.42375	0.0757976	0.410503	0.218254	85.3983
1	694.5	9.30586	5.13481	0.0677932	0.347621	0.2223	76.2962
1	677	18.9007	5.91231	0.066085	0.389394	0.202109	86.0351
1	586	9.28695	5.81492	0.057202	0.332156	0.19253	80.8932
1	606.5	8.80864	5.84446	0.0592031	0.34601	0.199657	80.9171
1	906	14.7253	4.90227	0.0884386	0.431849	0.242332	73.155
1	665.5	11.778	5.61844	0.0649624	0.364641	0.204898	67.2645
1	1114	12.2331	3.98455	0.108742	0.433237	0.283694	79.0682
1	408.5	10.0361	7.37862	0.0398755	0.289815	0.157034	74.025
1	879	13.3124	4.50874	0.0858031	0.38683	0.266759	82.1451
1	574	8.74787	5.78189	0.0560307	0.322427	0.20254	80.2153
1	561	27.9544	6.18787	0.0547617	0.339017	0.199775	67.3352
1	912.5	8.27983	4.48623	0.0890731	0.398372	0.242508	81.8359
1	928.5	5.85574	4.79165	0.090635	0.434154	0.25194	84.0759
1	691.5	10.6747	5.38108	0.0675004	0.362695	0.210401	76.1967
1	678.5	17.6967	5.71046	0.0662314	0.379043	0.243765	65.6893
1	886	11.273	4.69447	0.0864864	0.40463	0.246539	84.9134
1	638	11.351	5.33972	0.062278	0.332149	0.197229	80.5377
1	489	11.8073	6.74448	0.0477334	0.315936	0.17784	73.6105
1	778.5	10.0904	5.26313	0.0759928	0.400061	0.233054	83.9384
1	872	9.6342	4.85388	0.0851198	0.40953	0.243842	81.897
1	863	13.9414	4.87943	0.0842412	0.411092	0.247395	77.5003
1	799.5	6.58914	4.79408	0.0780427	0.373223	0.229425	72.9903
1	761	3.57523	5.01024	0.0742846	0.372601	0.240088	81.6752
1	787	17.4139	4.80601	0.0768225	0.369023	0.25688	71.3826
1	1129.5	33.9172	4.30493	0.110255	0.472383	0.28125	65.9216
1	670.5	10.9804	5.45946	0.0654505	0.354405	0.20735	76.217
1	609	6.90271	5.46731	0.0594472	0.323234	0.211666	84.3733
1	982.5	33.3695	4.71416	0.0959061	0.44988	0.28105	81.8563
1	734	5.43532	5.16187	0.071649	0.368576	0.222121	70.7731
1	657.5	12.5932	5.28603	0.0641815	0.33953	0.212853	79.5056
1	905.5	10.2034	4.61126	0.0883898	0.407708	0.250507	77.9188
1	876	12.5203	4.81614	0.0855102	0.410223	0.243765	78.8074
1	480	6.3602	5.94149	0.0468549	0.278307	0.200457	71.9511
1	751.5	25.2168	4.95241	0.0733572	0.362175	0.227654	77.9117
1	744	11.1743	5.24361	0.0726251	0.381024	0.229022	66.3804
1	1131	13.8627	4.21858	0.110402	0.462048	0.292463	83.0407
1	1172.5	9.96881	4.15252	0.114453	0.475244	0.289725	83.276
1	483	5.63223	5.64426	0.0471478	0.264128	0.191308	82.826
1	852.5	16.056	4.96993	0.0832163	0.412245	0.238691	71.2392
1	672	14.686	5.75799	0.0655969	0.37719	0.217583	83.4374
1	699.5	16.2855	5.6483	0.0682813	0.385357	0.20689	75.7474
1	799	13.8561	5.03204	0.0779939	0.391964	0.225787	83.362
1	648.5	6.17912	5.46343	0.0633029	0.344243	0.20748	72.5455
1	786.5	26.4592	5.19138	0.0767737	0.398447	0.255486	64.1342
1	1172.5	28.1124	4.38789	0.114453	0.49862	0.27767	70.8541
1	895.5	6.90375	4.87197	0.0874137	0.425059	0.244429	87.0786
1	606.5	7.03074	5.53527	0.0592031	0.327503	0.201047	77.5836
1	812	20.3109	5.05277	0.0792629	0.400628	0.230227	82.9083
1	947.5	38.4055	4.38077	0.0924896	0.404955	0.284311	56.5807
1	689	23.1907	5.37108	0.0672563	0.359683	0.22046	72.0744
1	1272	34.0384	4.58195	0.124166	0.560859	0.299026	69.1576
1	873	9.56009	4.97123	0.0852174	0.421785	0.237515	85.1036
1	585	11.851	5.79364	0.0571044	0.328019	0.200705	76.8351
1	1117.5	13.2494	4.50206	0.109084	0.490859	0.273014	79.4444
1	669	40.5367	5.48931	0.065304	0.355198	0.22724	62.9221
1	527	11.4422	5.79589	0.0514428	0.297619	0.187007	69.2482
1	501	14.7252	6.54014	0.0489048	0.317127	0.182925	80.7825
1	890	8.83289	5.13426	0.0868768	0.440784	0.240616	85.7154
1	708.5	8.75639	5.23724	0.0691598	0.361956	0.232671	66.9433
1	716.5	15.7968	4.97905	0.0699407	0.347977	0.234199	75.9022
1	965	17.7499	4.56058	0.0941979	0.428905	0.253451	70.6548
1	1155	9.13588	4.11999	0.112745	0.46418	0.283325	77.4696
1	1026	10.5798	4.23211	0.100152	0.423667	0.266432	79.0374
1	631.5	19.1743	5.7622	0.0616435	0.354836	0.2005	75.5113
1	606	26.0039	6.03664	0.0591543	0.357628	0.200271	71.2865
1	1297	12.3815	3.95045	0.126606	0.497335	0.298235	80.4782
1	695.5	37.2623	5.65905	0.0678908	0.383814	0.22046	77.0483
1	525.5	10.5587	6.18264	0.0512964	0.315025	0.188114	75.5987
1	658.5	11.9424	5.28506	0.0642791	0.339759	0.207943	75.4523
1	646	7.88822	5.47104	0.0630589	0.340579	0.212939	80.6413
1	711	15.506	5.37063	0.0694038	0.372551	0.213612	84.8132
1	1121.5	29.6317	4.23073	0.109475	0.463066	0.285835	74.3003
1	1102.5	12.7509	4.46301	0.10762	0.476207	0.276245	84.1312
1	936	8.10714	4.51258	0.0913671	0.411035	0.267266	85.0283
1	895.5	10.8264	5.03688	0.0874137	0.436896	0.24206	84.2685
1	492	8.80762	6.25704	0.0480263	0.298415	0.179966	80.28
1	755	5.47345	4.87503	0.0736989	0.359312	0.221474	82.3868
1	821.5	17.8014	4.98227	0.0801902	0.398944	0.244995	74.2805
1	1151.5	26.5832	4.32282	0.112403	0.484287	0.289858	78.8145
1	855	7.21587	4.89979	0.0834603	0.408732	0.230759	86.7971
1	622.5	18.3233	5.93113	0.060765	0.361388	0.207768	52.6093
1	655	18.009	5.99839	0.0639374	0.383474	0.200521	73.9973
1	854	9.90616	4.8574	0.0833627	0.405103	0.237737	84.8056
1	1080.5	12.343	4.23957	0.105472	0.442591	0.292841	85.537
1	767.5	12.7426	5.21917	0.0749191	0.390969	0.217472	79.4554
1	875.5	3.99022	4.52935	0.0854614	0.386717	0.247202	77.1261
1	620.5	9.38508	5.57593	0.0605697	0.337284	0.197939	79.5464
1	496.5	27.4433	6.62934	0.0484655	0.319777	0.193671	58.8554
1	981.5	19.747	4.21837	0.0958085	0.404113	0.265561	54.9316
1	730	8.48618	4.77496	0.0712585	0.338877	0.230689	80.0084
1	862.5	7.11921	5.06903	0.0841924	0.425063	0.232946	76.4844
1	1240	28.1629	3.92515	0.121042	0.471604	0.30628	74.1449
1	767.5	21.4356	5.3132	0.0749191	0.396573	0.221963	85.4188
1	596.5	6.78117	5.11182	0.058227	0.297222	0.214753	82.5549
1	887.5	9.60689	4.47463	0.0866328	0.387158	0.252351	80.5088
1	878	8.61928	4.61297	0.0857054	0.39522	0.250327	64.5087
1	719	13.3191	5.39227	0.0701848	0.378207	0.212868	76.7175
1	583.5	8.33962	5.74053	0.056958	0.32576	0.218078	67.5565
1	589	17.6291	6.03905	0.0574949	0.344809	0.18772	83.0145
1	622.5	5.26943	5.49091	0.060765	0.333653	0.206316	82.3993
1	846.5	4.72199	4.71436	0.0826306	0.389538	0.23712	83.2148
1	733.5	7.37453	5.21033	0.0716002	0.372173	0.234907	80.3901
1	740	5.35377	5.09423	0.0722347	0.367604	0.219065	80.4453
1	718.5	8.60668	5.17233	0.0701359	0.361997	0.208421	85.4198
1	669	9.22127	5.42979	0.065304	0.354209	0.207973	83.2498
1	850.5	17.0888	4.6901	0.083021	0.389702	0.24905	77.5058
1	870	10.3767	4.90425	0.0849245	0.418607	0.267581	57.6006
1	415.5	20.5164	8.35263	0.0405588	0.335697	0.180146	47.4398
1	589	4.42065	5.75764	0.0574949	0.330909	0.207118	62.6662
1	1096	12.1037	4.46415	0.106985	0.477607	0.282274	76.3951
1	1016.5	12.6499	4.3061	0.099225	0.425848	0.282794	76.6022
1	749.5	13.4936	5.38589	0.073162	0.394063	0.214319	85.5286
1	996.5	20.927	4.31771	0.0972727	0.419598	0.290137	84.875
1	1143.5	41.9345	4.38788	0.111622	0.489839	0.276473	76.3805
1	787.5	10.7046	5.07084	0.0768713	0.391402	0.240709	65.2664
1	827	18.9969	4.76378	0.0807271	0.385024	0.279064	76.1567
1	619.5	7.49614	5.53095	0.0604721	0.33402	0.214442	81.5159
1	827	19.9112	5.00683	0.0807271	0.400987	0.249737	79.373
1	826	7.29922	5.0262	0.0806295	0.403093	0.23893	69.787
1	949.5	21.6373	4.32419	0.0926849	0.402189	0.275909	85.1196
1	862.5	26.7019	5.29088	0.0841924	0.444791	0.235838	84.0582
1	832	13.0354	5.07528	0.0812152	0.410009	0.231786	70.3455
1	744	5.85715	5.5287	0.0726251	0.395949	0.237635	81.2027
1	764	28.4849	4.90532	0.0745774	0.362175	0.242529	67.1108
1	924.5	11.1981	4.4764	0.0902445	0.403538	0.276274	79.2806
1	680.5	8.854	5.25467	0.0664266	0.346912	0.21736	79.5694
1	589.5	5.59128	5.54927	0.0575437	0.318343	0.201494	81.4335
1	809	6.60135	4.91933	0.07897	0.387895	0.245321	76.625
1	764.5	22.356	5.08998	0.0746262	0.380002	0.224633	64.4067
1	920	11.3342	4.67798	0.0898052	0.419098	0.249152	70.5672
1	1242.5	43.1588	4.07235	0.121286	0.493751	0.29146	81.6174
1	712	19.3728	5.31076	0.0695015	0.368083	0.21487	71.1406
1	729.5	14.5512	5.32217	0.0712097	0.378291	0.228977	69.4616
1	963.5	9.52799	4.40531	0.0940515	0.415079	0.273947	80.726
1	1062.5	41.4208	4.10831	0.103715	0.423121	0.288296	72.6999
1	695	18.9127	5.64711	0.067842	0.383186	0.207949	76.9416
1	902.5	6.37237	4.76178	0.088097	0.417787	0.247	77.5371
1	965	4.63989	4.25087	0.0941979	0.399421	0.2717	82.2348
1	567	8.963	5.80138	0.0553474	0.32037	0.203502	79.6358
1	957	13.1181	4.51214	0.093417	0.423551	0.284123	66.2752
1	1036.5	23.9018	4.33757	0.101177	0.436119	0.289111	68.6012
1	630.5	16.7325	6.16916	0.0615459	0.379771	0.20471	57.3174
1	778	8.27198	4.91855	0.075944	0.37349	0.231729	81.8996
1	949	22.6744	4.56423	0.0926361	0.418576	0.270771	80.8906
1	1094	21.773	4.73615	0.10679	0.505257	0.279035	83.2825
1	872	20.748	4.64976	0.0851198	0.395127	0.248656	69.0582
1	986	24.5523	4.54215	0.0962478	0.434477	0.261684	73.8582
1	711.5	13.6258	5.4319	0.0694526	0.375895	0.220319	83.4686
1	823.5	17.847	5.07702	0.0803855	0.408153	0.224005	79.9629
1	920.5	43.8841	4.60847	0.0898541	0.415175	0.281608	72.913
1	1252.5	11.1643	4.24282	0.122262	0.518741	0.275745	80.996
1	617.5	6.73972	5.77551	0.0602769	0.346912	0.19701	73.6618
1	970	9.26953	4.46465	0.094686	0.423564	0.259239	75.7017
1	692.5	5.1272	5.52641	0.067598	0.370147	0.221136	83.0523
1	941.5	10.062	4.54567	0.091904	0.416755	0.279042	64.8102
1	1015.5	16.2383	4.47977	0.0991274	0.442868	0.270674	81.7637
1	705	6.29908	4.94513	0.0688182	0.338442	0.227814	77.8348
1	968.5	7.26934	4.55774	0.0945395	0.425059	0.264435	84.7559
1	862.5	18.5594	4.93044	0.0841924	0.414542	0.24567	57.8006
1	1235	12.3	4.19047	0.120554	0.503851	0.288528	83.0527
1	1002.5	15.9586	4.23402	0.0978584	0.414396	0.271686	86.9518
1	1078.5	13.1708	4.56836	0.105277	0.479382	0.257232	85.7383
1	582	4.17447	5.56074	0.0568116	0.314958	0.197939	80.0079
1	781	26.496	4.92283	0.0762368	0.37361	0.23218	65.8606
1	664	22.1486	5.39483	0.064816	0.349603	0.222715	63.1066
1	1024.5	7.96864	4.55699	0.100006	0.455627	0.271215	84.324
1	796	21.1977	4.88422	0.0777011	0.374838	0.236294	43.3659
1	654.5	8.04414	5.43785	0.0638886	0.346799	0.218792	76.6617
1	619.5	6.08727	5.51485	0.0604721	0.333043	0.199657	81.8052
1	1053.5	15.3008	4.10699	0.102837	0.422175	0.28686	80.4882
1	574	16.6869	6.02435	0.0560307	0.336248	0.187994	72.3469
1	1124.5	27.6556	4.17626	0.109767	0.457783	0.292864	72.618
1	1106	6.58535	4.24817	0.107962	0.458489	0.274298	75.1082
1	1141	19.7024	4.24367	0.111378	0.467292	0.294656	75.2498
1	645.5	16.4946	5.69179	0.0630101	0.356197	0.206726	79.1935
1	1086	21.0003	4.25026	0.106009	0.446537	0.295035	74.225
1	718	6.83205	5.4398	0.0700871	0.383367	0.217829	84.1803
1	1054	38.6265	4.07453	0.102886	0.417456	0.285933	71.521
1	1062	39.8964	4.36907	0.103666	0.450761	0.275416	73.9528
1	848	7.4379	4.79529	0.082777	0.395995	0.234611	80.7527
1	1045.5	12.9584	4.32984	0.102056	0.440587	0.267552	85.1812
1	533.5	6.19551	5.73858	0.0520773	0.298895	0.194655	76.9757
1	641.5	26.5395	5.79607	0.0626196	0.358889	0.211282	79.2646
1	943	18.1127	4.66214	0.0920504	0.428313	0.241703	63.5287
1	662.5	3.89199	5.29228	0.0646695	0.341823	0.21736	82.2643
1	953	14.7141	4.37595	0.0930265	0.405101	0.282753	82.7784
1	930.5	12.6486	4.56166	0.0908302	0.413577	0.247	79.7153
1	866	5.51443	4.80754	0.0845341	0.406355	0.242471	69.526
1	1168	19.3365	4.14493	0.114014	0.4692	0.294036	70.8959
1	846.5	20.7307	5.24781	0.0826306	0.429411	0.231391	81.9675
1	1032.5	26.8678	4.42676	0.100787	0.445825	0.268544	79.0423
1	1094.5	25.0149	4.24036	0.106839	0.451984	0.268164	83.3053
1	691.5	8.93966	5.25478	0.0675004	0.353564	0.21736	76.3702
1	879.5	5.99396	4.37967	0.0858519	0.37576	0.279536	86.8896
1	800.5	14.6598	5.24233	0.0781403	0.409633	0.231159	80.7514
1	636.5	7.89142	5.71651	0.0621316	0.352158	0.205311	81.6719
1	1112.5	17.3814	4.03948	0.108596	0.438391	0.290845	85.2665
1	855	5.69391	5.08113	0.0834603	0.421149	0.24536	78.448
1	1080	8.68783	4.42825	0.105424	0.466457	0.262823	76.9001
1	751	14.7785	5.65557	0.0733084	0.414637	0.218256	64.6447
1	1052.5	20.232	4.25049	0.102739	0.435726	0.266855	78.9739
1	878.5	16.399	5.14862	0.0857542	0.441286	0.245862	85.0336
1	700	8.20255	5.39137	0.0683301	0.367481	0.210305	83.2674
1	691	27.0516	5.3038	0.0674516	0.356044	0.224658	76.8424
1	897.5	14.1448	4.82152	0.0876089	0.417831	0.242508	81.3007
1	912.5	8.55179	4.65247	0.0890731	0.414289	0.239241	79.0993
1	844	15.6268	4.97853	0.0823866	0.410223	0.232591	75.9094
1	987	13.5133	4.69639	0.0963454	0.450279	0.245862	82.1009
1	948.5	12.6637	4.40619	0.0925873	0.405766	0.255031	74.9104
1	586	14.783	6.03553	0.057202	0.344159	0.203562	74.8083
1	709	8.91944	4.98329	0.0692086	0.343676	0.209463	84.345
1	786.5	12.269	5.13957	0.0767737	0.394379	0.25331	84.0832
1	733.5	8.77156	5.82319	0.0716002	0.416999	0.214746	79.3793
1	1036	14.216	4.94222	0.101129	0.496752	0.280572	77.6272
1	1030.5	17.3874	4.49579	0.100592	0.449161	0.276194	68.8877
1	541	7.71691	6.06365	0.0528094	0.320016	0.21104	47.8989
1	706	6.25435	5.36877	0.0689158	0.369068	0.2195	82.5393
1	1031	9.85748	4.68525	0.10064	0.468872	0.270626	76.3026
1	1081	11.021	4.46195	0.105521	0.46613	0.273524	86.2454
1	995.5	9.52949	4.26416	0.0971751	0.413706	0.273814	77.3133
1	1113	10.093	4.11796	0.108645	0.447166	0.292466	64.438
1	540.5	17.5065	6.52885	0.0527606	0.341948	0.185821	85.2759
1	968	11.254	4.60469	0.0944907	0.433447	0.250649	79.4855
1	391	12.9295	7.12701	0.0381672	0.271441	0.174831	57.4197
1	932	9.45143	4.42006	0.0909766	0.402083	0.247493	80.7065
1	1191	8.2969	4.2477	0.116259	0.493349	0.2717	80.3326
1	746	31.5645	5.25766	0.0728203	0.381083	0.227709	73.486
1	979	10.1376	4.38945	0.0955645	0.419156	0.288771	84.569
1	726.5	14.1478	5.20206	0.0709169	0.368963	0.222729	46.0775
1	828.5	7.64459	5.12819	0.0808735	0.412649	0.22872	83.8813
1	752	4.86346	5.20356	0.073406	0.380191	0.22928	79.6107
1	697	7.94247	5.50783	0.0680372	0.374951	0.2195	71.7896
1	898	15.4357	4.8182	0.0876577	0.421054	0.237219	82.6853
1	920	6.72353	4.77947	0.0898052	0.428255	0.247	85.1333
1	953.5	15.8517	4.73516	0.0930753	0.44068	0.236085	69.2274
1	627	9.09831	5.54819	0.0612042	0.335708	0.211449	50.4299
1	828	9.07362	4.81297	0.0808247	0.388772	0.232845	76.2709
1	828.5	11.1758	5.10591	0.0808735	0.41294	0.226269	83.1196
1	1024.5	19.4606	4.1662	0.100006	0.404513	0.296269	69.2067
1	637	13.8938	5.2232	0.0621804	0.323178	0.209315	53.0922
1	913	20.0447	4.99706	0.0891219	0.44431	0.27775	78.9278
1	1049	15.2874	4.31631	0.102398	0.442384	0.263391	65.6109
1	652	19.9178	5.57433	0.0636446	0.353173	0.20555	60.9799
1	905.5	15.695	4.80938	0.0883898	0.424224	0.249865	62.0259
1	1021	23.0558	4.34197	0.0996643	0.429125	0.281214	74.9421
1	1282.5	19.3832	4.31679	0.12519	0.540578	0.271191	83.6814
1	867.5	10.5244	4.56285	0.0846805	0.383869	0.249996	76.3251
1	1059.5	16.314	4.48028	0.103422	0.460809	0.262743	81.1393
1	590	37.1642	5.95359	0.0575925	0.341814	0.194487	67.7407
1	723	7.88199	5.09838	0.0705752	0.356558	0.22862	85.553
1	508	13.786	6.31206	0.0495881	0.312062	0.193971	88.5475
1	607	10.5091	5.87211	0.0592519	0.348337	0.244215	54.9136
1	513	6.57398	5.79253	0.0500762	0.289706	0.18265	70.8783
1	593	6.45412	5.64819	0.0578853	0.326895	0.207919	79.9329
1	1343	16.1157	3.88572	0.131096	0.509406	0.301741	78.8521
1	798.5	5.31188	4.96687	0.0779451	0.386766	0.233917	78.7043
1	899.5	11.7845	4.89919	0.0878042	0.427893	0.240899	80.6349
1	1038	35.6407	4.34309	0.101324	0.439958	0.291071	77.172
1	578.5	5.34111	5.64765	0.0564699	0.318535	0.213755	51.9082
1	781.5	10.1118	5.03154	0.0762857	0.384093	0.239319	76.3906
1	920	18.2888	4.27257	0.0898052	0.384341	0.279847	77.8621
1	656.5	3.85632	5.11454	0.0640839	0.327756	0.215091	78.0188
1	1120	10.5335	4.65685	0.109328	0.507104	0.260002	82.7871
1	1028	6.92165	4.04268	0.100348	0.405015	0.28652	84.9179
1	678.5	6.79133	5.31478	0.0662314	0.350202	0.217829	74.875
1	703	22.7795	4.68149	0.0686229	0.321319	0.246103	46.1258
1	772	11.7975	5.07148	0.0753583	0.38174	0.235346	77.5093
1	912	15.2997	4.70685	0.0890243	0.417456	0.246634	77.916
1	738.5	4.36354	4.87724	0.0720882	0.351618	0.229691	80.7879
1	803	21.2712	4.86094	0.0783844	0.379676	0.24206	70.2336
1	911.5	5.9951	4.6075	0.0889755	0.410014	0.264716	74.1633
1	991	4.3807	4.37493	0.0967359	0.420592	0.282066	76.0288
1	967.5	8.36854	4.7526	0.0944419	0.448674	0.253451	71.4428
1	640	14.3227	5.39713	0.0624732	0.33511	0.217483	64.551
1	956.5	6.98013	4.43326	0.0933682	0.413232	0.295488	75.3812
1	908	9.76248	4.80403	0.0886339	0.423423	0.243289	83.3053
1	1079.5	17.2387	4.44421	0.105375	0.46558	0.274822	84.824
1	509.5	4.6761	6.1087	0.0497345	0.303707	0.18759	66.041
1	757.5	9.95432	5.28709	0.0739429	0.390603	0.223668	68.4573
1	976.5	7.70849	4.4135	0.0953205	0.420509	0.264788	73.0795
1	914	10.9112	4.92591	0.0892196	0.438213	0.245326	75.0465
1	799	10.9389	4.96574	0.0779939	0.388567	0.261833	61.884
1	1037	9.8426	4.25251	0.101226	0.428614	0.295148	86.9574
1	1100.5	6.003	4.23902	0.107425	0.455254	0.283579	88.1087
1	714	12.5897	5.4281	0.0696967	0.373454	0.214566	83.3038
1	810.5	14.3507	5.16289	0.0791165	0.407904	0.23711	82.3246
1	800.5	18.24	5.08416	0.0781403	0.397182	0.243377	82.3137
1	667.5	7.06462	5.20471	0.0651576	0.338596	0.222769	81.152
1	826.5	3.87425	4.51255	0.0806783	0.363743	0.248571	82.1624
1	993.5	10.7675	4.52561	0.0969799	0.438527	0.2717	80.7237
1	1022	9.39674	4.23818	0.0997619	0.422264	0.29634	54.9688
1	853	12.1769	4.9583	0.0832651	0.412651	0.252714	77.1153
1	898.5	13.5671	4.68902	0.0877065	0.411157	0.252418	65.1182
1	1045.5	14.0883	4.18778	0.102056	0.427944	0.301987	70.7807
1	951.5	31.6611	4.66345	0.0928801	0.431476	0.272448	63.4135
1	488.5	14.4305	6.07975	0.0476846	0.285036	0.201706	69.841
1	514.5	2.96723	5.70954	0.0502226	0.28652	0.19688	63.4349
1	583.5	3.75678	5.67777	0.056958	0.321339	0.201012	70.6529
1	667	6.41392	5.02751	0.0651088	0.32735	0.226698	81.2523
1	841.5	5.78819	4.58873	0.0821425	0.376771	0.258084	84.7527
1	920.5	5.51657	4.79179	0.0898541	0.430483	0.262231	86.7257
1	1103.5	9.68391	4.39163	0.107717	0.472101	0.263141	79.7004
1	882	16.4252	5.07335	0.0860959	0.436938	0.25049	60.4223
1	1005.5	13.3486	4.51845	0.0981513	0.441606	0.272295	72.9532
1	903	7.93547	4.43663	0.0881458	0.389227	0.268781	70.8997
1	1052	14.7446	4.12849	0.10269	0.423723	0.294686	76.9733
1	913.5	10.8028	4.68939	0.0891708	0.417306	0.245436	84.6133
1	705	8.03846	5.23639	0.0688182	0.358434	0.241588	64.4774
1	776	32.7432	5.32876	0.0757488	0.403454	0.222972	77.0692
1	758.5	8.28362	5.21371	0.0740405	0.380554	0.225749	68.3666
1	816	8.54087	5.36236	0.0796533	0.426477	0.2223	80.7237
1	640.5	5.39375	5.17829	0.062522	0.325575	0.231209	79.0499
1	882	21.8762	4.37908	0.0860959	0.373594	0.278151	66.8529
1	599.5	2.63298	5.43651	0.0585198	0.318207	0.211749	63.1315
1	986.5	15.3312	4.24172	0.0962966	0.404254	0.286629	71.8294
1	948	6.79375	4.384	0.0925384	0.405369	0.291169	67.3717
1	776	6.71655	5.01904	0.0757488	0.380191	0.232748	86.0807
1	969	14.1599	4.32902	0.0945884	0.406878	0.27664	68.9099
1	992.5	9.87346	4.54136	0.0968823	0.439733	0.280427	64.6917
1	1005	13.3481	5.08708	0.0981025	0.487783	0.27707	71.8387
1	694.5	14.5138	5.31116	0.0677932	0.357766	0.222403	56.8748
1	857.5	5.28439	4.54339	0.0837043	0.38012	0.25194	80.4727
1	904.5	8.18561	4.6202	0.0882922	0.406163	0.248089	85.6148
1	1096	7.76719	4.53775	0.106985	0.485489	0.283257	84.222
1	824	9.12855	4.88646	0.0804343	0.392692	0.237515	75.2563
1	1065.5	6.28382	4.18983	0.104008	0.434962	0.275317	82.0323
1	799	9.47956	5.14331	0.0779939	0.400015	0.252043	64.1728
1	985.5	16.8683	4.3018	0.096199	0.41254	0.291812	65.4555
1	1063	9.66867	4.10901	0.103764	0.426142	0.284046	70.9248
1	734.5	5.03581	5.01328	0.0716978	0.357995	0.229842	77.0711
1	656	11.3567	5.70487	0.064035	0.365021	0.21183	81.2228
1	748	12.6209	5.23748	0.0730156	0.382428	0.238796	74.3018
1	982	6.04394	4.69069	0.0958573	0.444992	0.259426	83.1262
1	1154	7.59573	4.18691	0.112647	0.471801	0.290735	81.3791
1	650.5	8.7326	5.32277	0.0634982	0.337677	0.216571	79.0098
1	609.5	7.72808	5.39263	0.059496	0.317506	0.22665	84.4935
1	1249.5	39.9008	4.1617	0.121969	0.507948	0.284811	77.4831
1	819	12.6319	5.15613	0.0799462	0.411524	0.229433	82.9916
1	545	4.53476	6.18256	0.0531998	0.325607	0.199796	59.2719
1	705.5	3.75533	4.94681	0.068867	0.340274	0.226451	84.6813
1	990.5	6.69238	4.28956	0.0966871	0.413764	0.26182	77.22
1	953	15.1402	4.24949	0.0930265	0.395667	0.272842	84.0533
1	877.5	16.2737	4.61715	0.0856566	0.394002	0.260387	85.0805
1	989	5.89182	4.15945	0.0965406	0.401386	0.280572	81.9534
1	940	13.0702	4.57329	0.0917575	0.419875	0.259616	82.048
1	908	18.2787	4.51849	0.0886339	0.400175	0.258769	67.0181
1	867	17.0583	4.89549	0.0846317	0.412247	0.242535	79.037
1	851.5	9.40176	4.61391	0.0831187	0.383536	0.253413	65.3988
1	792	4.95735	4.84674	0.0773106	0.374	0.237219	66.1877
1	773	6.82918	5.2769	0.0754559	0.394006	0.242868	74.8648
1	938	15.2201	4.57024	0.0915623	0.417049	0.275416	84.6225
1	611	6.22123	5.52982	0.0596424	0.327235	0.206035	77.5057
1	934.5	14.4352	4.63528	0.0912207	0.422785	0.252335	81.6702
1	877.5	8.26704	4.94222	0.0856566	0.421299	0.251128	66.7135
1	724	5.98922	5.3201	0.0706728	0.375795	0.226451	83.0496
1	709	22.6183	5.1423	0.0692086	0.354731	0.258883	59.5826
1	1060	19.8671	4.28815	0.103471	0.442769	0.289136	77.9569
1	761.5	11.4869	4.98129	0.0743334	0.370267	0.242493	69.1235
1	775	6.01282	4.77489	0.0756512	0.360292	0.23218	64.2221
1	917	3.79695	4.3899	0.0895124	0.392924	0.270014	69.7926
1	632	6.3249	5.41655	0.0616923	0.33402	0.219065	64.8837
1	1037	12.7413	4.48951	0.101226	0.455117	0.280746	73.2125
1	727	4.38643	5.1109	0.0709657	0.361305	0.22724	80.3425
1	927	7.21794	4.63491	0.0904885	0.417018	0.252351	77.1153
1	884.5	8.25135	4.82044	0.0863399	0.415612	0.254947	86.3893
1	962.5	41.4061	4.48265	0.0939539	0.418673	0.294889	72.1249
1	637	3.58604	5.886	0.0621804	0.363729	0.212785	81.1823
1	625	11.0497	5.07877	0.061009	0.309572	0.214377	61.1691
1	844.5	22.7775	4.77695	0.0824354	0.391835	0.26676	70.5512
1	943	12.9926	4.68562	0.0920504	0.429796	0.248229	80.8631
1	642.5	33.8045	5.42303	0.0627173	0.339385	0.218793	47.4538
1	845	24.9588	4.73515	0.0824842	0.389289	0.254888	71.3242
1	639	9.19468	4.99671	0.0623756	0.308578	0.211243	81.2435
1	807	5.79815	4.96313	0.0787748	0.390984	0.232287	73.3008
1	834.5	8.84059	4.58032	0.0814592	0.372718	0.234513	81.5302
1	751	11.2983	5.13403	0.0733084	0.376379	0.224771	83.3388
1	1115	11.6605	4.20991	0.10884	0.455451	0.29146	84.3536
1	902.5	5.54525	4.49118	0.088097	0.392832	0.273256	73.9357
1	794.5	7.32371	5.05446	0.0775546	0.39134	0.248229	82.6396
1	1098	9.05075	4.3993	0.107181	0.467702	0.276731	77.5972
1	1192.5	10.7856	4.16358	0.116405	0.482201	0.2946	83.1955
1	913	14.141	4.5769	0.0891219	0.408452	0.275671	71.4655
1	955.5	6.98201	4.52498	0.0932706	0.420104	0.261964	78.061
1	579	21.8301	6.01216	0.0565187	0.339305	0.212313	72.2968
1	1019	33.0099	4.55638	0.0994691	0.453077	0.274474	86.814
1	964.5	6.06234	4.50078	0.0941491	0.423802	0.26163	69.7459
1	927.5	6.93433	4.3805	0.0905374	0.392846	0.280427	76.607
1	899.5	21.7523	4.47229	0.0878042	0.392579	0.256595	75.7109
1	973	12.5051	4.49237	0.0949788	0.425515	0.291704	76.797
1	1063	14.0146	4.64004	0.103764	0.479588	0.269647	76.4092
1	796	6.46953	5.15604	0.0777011	0.397645	0.248769	84.9545
1	847.5	6.19225	4.80597	0.0827282	0.397837	0.251209	73.8002
1	914.5	18.6763	4.73942	0.0892684	0.424048	0.272823	73.2362
1	718.5	4.91412	5.22976	0.0701359	0.36546	0.217829	85.485
1	953	12.5472	4.70156	0.0930265	0.435021	0.27009	84.3726
1	445	5.13264	6.34301	0.0434384	0.274684	0.178419	57.3118
1	699.5	4.2989	5.023	0.0682813	0.34246	0.226937	85.6634
1	1086.5	6.64549	4.28314	0.106058	0.454148	0.292252	66.1293
1	614	10.0978	5.92342	0.0599352	0.353009	0.200271	82.1869
1	1038.5	20.454	4.42182	0.101373	0.444559	0.267155	77.9405
1	972	6.87728	4.21728	0.0948812	0.39852	0.2717	69.4719
1	645.5	7.08031	5.54089	0.0630101	0.349078	0.21242	78.7165
1	807.5	3.60511	4.98439	0.0788236	0.389846	0.234356	87.0208
1	910	7.57336	4.82434	0.0888291	0.424928	0.243475	70.3404
1	698	6.63373	5.05219	0.0681349	0.344043	0.229105	75.5787
1	947	25.4413	4.40373	0.0924408	0.406513	0.26676	74.3804
1	919.5	9.73089	4.36576	0.0897564	0.391903	0.27664	76.2582
1	1268	11.4578	3.9482	0.123775	0.486163	0.288007	84.5572
1	976	18.9146	4.21316	0.0952717	0.397622	0.280812	67.8098
1	1086	22.552	3.99536	0.106009	0.41924	0.296752	73.0739
1	901.5	27.0109	4.8599	0.0879994	0.42587	0.267763	60.1589
1	913.5	8.01704	4.58348	0.0891708	0.407363	0.260134	83.5027
1	893.5	6.71629	4.53916	0.0872185	0.395848	0.25175	65.5245
1	968	11.8066	4.58981	0.0944907	0.429299	0.284092	84.0193
1	980	8.33651	4.36826	0.0956621	0.417456	0.267552	81.1789
1	883.5	7.95726	4.94107	0.0862423	0.424475	0.235023	86.307
1	659.5	13.8715	5.75041	0.0643767	0.370034	0.204322	67.9219
1	887	4.99197	4.78839	0.086584	0.414371	0.253223	64.7216
1	979	35.3929	4.29953	0.0955645	0.411566	0.292899	58.0156
1	614	6.72096	5.52307	0.0599352	0.329899	0.205987	78.5354
1	582.5	5.26995	5.70155	0.0568604	0.324196	0.21062	78.6053
1	915.5	6.93663	4.70372	0.089366	0.419641	0.244995	81.0958
1	780	8.34224	4.88594	0.0761392	0.369798	0.241271	82.9304
1	966	14.351	4.4818	0.0942955	0.421331	0.261112	86.4498
1	493	48.6085	6.73257	0.0481239	0.312275	0.198744	72.1363
1	650	7.1364	5.69998	0.0634494	0.358008	0.224149	64.538
1	843.5	10.1859	5.10681	0.0823377	0.421733	0.264505	68.5595
1	676	7.53733	5.37786	0.0659873	0.354145	0.214202	78.498
1	859.5	13.5566	4.96682	0.0838996	0.415817	0.237549	80.9881
1	813.5	11.006	5.2863	0.0794093	0.418822	0.233023	73.9625
1	646	7.4573	5.94716	0.0630589	0.375091	0.236036	58.2796
1	842	3.66568	4.58706	0.0821913	0.378691	0.269372	57.7181
1	1022	11.7154	4.5396	0.0997619	0.451145	0.28399	81.4017
1	793	48.1062	5.76735	0.0774082	0.446269	0.218481	72.6415
1	846.5	9.8671	4.73615	0.0826306	0.388733	0.254196	75.4168
1	980	15.2737	4.34901	0.0956621	0.415713	0.261915	75.6902
1	1072.5	8.77417	4.20697	0.104691	0.440004	0.28652	82.875
1	763	7.53979	5.07388	0.0744798	0.378538	0.255754	70.6243
1	1020.5	15.4543	4.21707	0.0996155	0.419871	0.271469	78.1401
1	798	5.15435	5.04188	0.0778963	0.39283	0.245672	75.1276
1	681	5.00761	5.14596	0.0664754	0.342463	0.223079	86.9487
1	709.5	3.16262	4.90667	0.0692574	0.339601	0.226338	83.4092
1	745.5	15.7962	5.22755	0.0727715	0.38051	0.23465	68.7098
1	891.5	7.26081	4.4935	0.0870232	0.390737	0.270389	88.1841
1	854	7.48217	4.85292	0.0833627	0.399939	0.234045	81.5314
1	1016	28.6462	4.50003	0.0991762	0.446063	0.259812	85.7829
1	829.5	9.07334	5.06964	0.0809711	0.409093	0.259788	79.5215
1	1046.5	7.20733	4.14318	0.102153	0.42242	0.293758	83.7347
1	555	5.75999	5.66571	0.054176	0.306217	0.199933	77.8389
1	732.5	6.99013	5.01492	0.0715025	0.360009	0.25194	78.6235
1	802.5	6.41621	5.3214	0.0783356	0.41211	0.22892	75.4331
1	794	5.3037	4.9325	0.0775058	0.382011	0.236544	79.83
1	915.5	32.474	4.60355	0.089366	0.406631	0.265256	71.2575
1	776	26.8345	5.42011	0.0757488	0.410708	0.237407	77.8231
1	935	11.1201	4.41191	0.0912695	0.401471	0.265734	81.3036
1	872.5	8.03402	4.33508	0.0851686	0.369023	0.269188	82.1599
1	639.5	7.7459	5.90308	0.0624244	0.361592	0.201551	74.4562
1	732	8.73971	4.87091	0.0714537	0.34706	0.244429	66.143
1	900	17.3453	4.84655	0.087853	0.427022	0.246207	80.6001
1	777.5	8.60104	5.17565	0.0758952	0.392271	0.251746	83.3272
1	820.5	8.57032	4.84237	0.0800926	0.38784	0.23712	84.8161
1	761	15.5578	5.3	0.0742846	0.393954	0.231493	81.4223
1	659	4.82162	5.39701	0.0643279	0.347106	0.229573	50.3823
1	840	7.63158	4.85868	0.0819961	0.398434	0.245864	61.1065
1	601.5	10.5849	5.90758	0.0587151	0.346457	0.215889	81.8255
1	754	6.46999	4.73811	0.0736013	0.34946	0.237719	79.0594
1	740	4.58793	5.19995	0.0722347	0.374202	0.225765	85.6912
1	820.5	7.15058	4.81028	0.0800926	0.384305	0.25886	86.5444
1	862	24.5095	4.97885	0.0841436	0.417779	0.24206	85.4956
1	975	13.7809	4.3639	0.095174	0.416159	0.277075	60.4488
1	691	7.986	5.55945	0.0674516	0.374048	0.230597	57.7316
1	660.5	16.8976	5.15345	0.0644743	0.331432	0.241775	74.7871
1	689.5	15.915	5.2326	0.0673051	0.351649	0.227314	77.2695
1	909.5	11.3478	4.89725	0.0887803	0.432726	0.25508	82.875
1	878	13.9363	4.89626	0.0857054	0.419056	0.233988	83.4463
1	717.5	21.7145	5.2754	0.0700383	0.368278	0.237887	47.781
1	626.5	22.8873	6.72048	0.0611554	0.409508	0.22207	68.4139
1	799.5	7.07631	5.87423	0.0780427	0.444633	0.253247	78.6132
1	882.5	14.5337	4.57687	0.0861447	0.393366	0.255742	78.8507
1	774.5	5.06885	4.86686	0.0756024	0.367178	0.237549	83.14
1	966.5	4.78023	4.45329	0.0943443	0.42037	0.258953	76.8972
1	928	8.3095	4.27635	0.0905862	0.388346	0.2975	63.1876
1	1067.5	28.0401	4.21436	0.104203	0.439269	0.292055	59.1311
1	931.5	6.17819	4.37871	0.0909278	0.397682	0.284515	67.8924
1	847.5	8.51443	4.65419	0.0827282	0.384362	0.256514	70.0036
1	1227	7.49616	4.14863	0.119773	0.496899	0.289554	85.5695
1	884.5	25.9852	4.75651	0.0863399	0.408349	0.256638	77.7679
1	972.5	14.5419	4.50214	0.09493	0.428694	0.287115	84.4017
1	507	7.58706	5.92805	0.0494905	0.291917	0.198063	84.0557
1	685.5	5.31857	4.76862	0.0669147	0.319068	0.239268	75.3563
1	526.5	3.49044	6.76754	0.051394	0.344398	0.176412	77.5822
1	663	6.29725	5.46731	0.0647183	0.353654	0.20544	81.0562
1	889.5	47.7379	4.35559	0.086828	0.378173	0.284149	67.808
1	750.5	5.94302	5.03765	0.0732596	0.368999	0.217808	82.9349
1	861	5.6017	4.57496	0.084046	0.382967	0.247092	74.7449
1	1126	6.57858	4.35478	0.109914	0.477038	0.273156	83.0801
1	636.5	3.62167	5.27327	0.0621316	0.327414	0.21183	69.0367
1	1000.5	25.3746	4.52987	0.0976632	0.440263	0.263224	80.9581
1	856.5	7.78734	4.78837	0.0836067	0.401147	0.259302	63.1635
1	942	5.27911	4.36151	0.0919528	0.400954	0.25688	82.0025
1	757.5	6.24148	5.08388	0.0739429	0.375895	0.221736	85.5218
1	974	28.1403	4.47235	0.0950764	0.424898	0.275292	80.3884
1	642	6.96252	5.41576	0.0626684	0.335744	0.216222	83.148
1	775.5	6.28825	5.24415	0.0757	0.394368	0.248535	81.4086
1	681	14.905	5.96861	0.0664754	0.400361	0.217243	86.7762
1	584	4.60962	5.70551	0.0570068	0.325048	0.197758	62.1004
1	943	9.9805	4.60557	0.0920504	0.420336	0.26775	84.4539
1	1049.5	7.7467	4.00296	0.102446	0.409993	0.296782	73.511
1	913.5	6.4246	4.40256	0.0891708	0.39275	0.252144	68.8749
1	871.5	6.64275	4.8855	0.0850709	0.415179	0.256908	72.5897
1	1046	7.82092	4.27222	0.102105	0.43386	0.2717	85.2364
1	807.5	6.33395	4.99754	0.0788236	0.393467	0.239995	79.0798
1	669.5	9.09209	5.74938	0.0653528	0.375745	0.22474	64.6156
1	849	7.00782	4.94492	0.0828746	0.408197	0.239241	83.0112
1	950.5	28.8684	4.6075	0.0927825	0.425562	0.272295	80.4785
1	834	7.78383	4.83113	0.0814104	0.392656	0.234613	74.9569
1	986	5.84288	4.32717	0.0962478	0.413577	0.268926	77.6974
1	878	7.69283	4.4966	0.0857054	0.384519	0.283036	68.0974
1	596	10.892	5.68598	0.0581782	0.330492	0.205461	71.9863
1	851	12.4612	4.92853	0.0830699	0.4097	0.240769	83.5946
1	609.5	3.49867	5.48268	0.059496	0.323293	0.218726	74.9791
1	840.5	5.28997	4.8751	0.0820449	0.396568	0.262204	70.2263
1	860	6.96693	4.69309	0.0839484	0.396651	0.281358	72.1254
1	946	7.41286	4.50866	0.0923432	0.415526	0.258632	76.7281
1	841.5	7.6146	4.78576	0.0821425	0.392966	0.245809	80.3134
1	1057	6.40995	4.22988	0.103178	0.436552	0.28506	82.3497
1	957	9.7804	4.3332	0.093417	0.402363	0.276194	65.3931
1	1106	21.6121	4.26153	0.107962	0.457696	0.287976	76.3506
1	912.5	32.5429	4.76127	0.0890731	0.426246	0.284008	68.3259
1	595	6.82108	5.31205	0.0580806	0.308592	0.202663	80.122
1	916	11.2358	4.83244	0.0894148	0.432912	0.267849	71.8981
1	928	12.897	4.57664	0.0905862	0.413364	0.260619	83.3101
1	849.5	4.92419	4.65751	0.0829234	0.38532	0.251676	57.2974
1	697	4.91445	5.23069	0.0680372	0.356866	0.235943	57.8733
1	787.5	8.44918	5.0786	0.0768713	0.389199	0.231471	78.4724
1	851	15.7374	5.11175	0.0830699	0.42507	0.240028	75.5887
1	901	7.94121	4.67384	0.0879506	0.406124	0.267495	73.7964
1	1020	13.8365	4.37434	0.0995667	0.431181	0.281489	82.4313
1	914	7.13121	4.65686	0.0892196	0.413357	0.266926	81.3834
1	1016.5	11.7109	4.4067	0.099225	0.437518	0.26182	75.9857
1	628	14.8177	5.76413	0.0613018	0.351805	0.210489	78.328
1	880	8.51366	4.50215	0.0859007	0.385066	0.26182	81.8699
1	524	6.41558	6.09617	0.0511499	0.311582	0.19266	71.5651
1	870	13.5242	4.61516	0.0849245	0.390845	0.248229	73.2324
1	860	10.1937	4.74695	0.0839484	0.397832	0.247789	68.7844
1	794.5	20.4568	5.2137	0.0775546	0.404216	0.227352	80.1164
1	541.5	7.8206	6.1378	0.0528582	0.324155	0.194717	71.1672
1	742.5	8.76604	5.30216	0.0724787	0.384858	0.218904	81.3052
1	693	11.4883	5.28739	0.0676468	0.356354	0.219535	71.0984
1	878.5	12.1389	4.62469	0.0857543	0.395995	0.23712	77.9622
1	882.5	15.7461	5.00871	0.0861447	0.43145	0.235982	85.8281
1	1024	8.74088	4.20351	0.0999571	0.419612	0.280257	70.3875
1	1140	7.1592	4.06686	0.11128	0.451243	0.288591	68.0907
1	1051	7.78411	4.40109	0.102593	0.449605	0.273056	80.1317
1	849	6.63442	4.65043	0.0828746	0.384222	0.244465	63.7204
1	799.5	22.1088	5.36064	0.0780427	0.41809	0.237326	83.8223
1	633.5	8.43446	5.81799	0.0618387	0.354474	0.230968	67.5504
1	975.5	7.06995	4.54648	0.0952228	0.432725	0.252858	79.9215
1	1040.5	13.3052	4.20555	0.101568	0.425023	0.272929	81.0523
1	633	6.25376	5.56042	0.0617899	0.342393	0.194561	81.2201
1	812	38.2157	4.95858	0.0792629	0.392846	0.260497	66.7049
1	889	5.54427	4.71564	0.0867792	0.406842	0.260885	76.4681
1	869.5	5.52029	4.62931	0.0848757	0.392502	0.253846	61.6822
1	1041	11.1406	4.25539	0.101617	0.430934	0.283354	84.0279
1	970	33.0445	4.30114	0.094686	0.407149	0.28519	67.6553
1	751	12.8451	5.30002	0.0733084	0.388286	0.22724	79.4554
1	933.5	4.74288	4.56542	0.091123	0.415972	0.257987	85.7703
1	966	4.59508	4.3952	0.0942955	0.413795	0.271755	83.0371
1	837.5	18.1009	5.01124	0.0817521	0.410104	0.262303	56.11
1	676.5	5.00344	5.24234	0.0660361	0.345798	0.21736	74.8382
1	1204.5	33.985	3.99558	0.117577	0.47023	0.296811	74.6969
1	994.5	9.72208	4.65282	0.0970775	0.451113	0.277492	69.0745
1	940.5	8.09943	4.0647	0.0918063	0.371423	0.291052	74.6728
1	767	8.91015	4.95287	0.0748702	0.373701	0.26049	36.1149
1	998	5.69832	4.23453	0.0974192	0.412975	0.279225	61.7297
1	1067.5	74.3372	4.41037	0.104203	0.45728	0.287523	54.6248
1	1160.5	38.4378	4.09633	0.113282	0.46013	0.300083	71.0175
1	1049.5	8.90085	4.35477	0.102446	0.4441	0.258604	84.9424
1	833.5	4.98378	4.67965	0.0813616	0.380326	0.249946	82.6077
1	1061	7.96032	4.27785	0.103569	0.442923	0.270014	83.2545
1	1018	13.5265	4.57557	0.0993715	0.451518	0.274859	69.3153
1	1047	7.90473	4.20366	0.102202	0.429197	0.294269	78.3677
1	1080.5	38.6383	4.16507	0.105472	0.439288	0.287876	75.2365
1	943.5	13.5732	4.75919	0.0920992	0.438337	0.248473	83.1739
1	1058.5	14.7221	4.48179	0.103325	0.459506	0.28004	74.9105
1	1131.5	13.6099	4.17365	0.110451	0.460422	0.294072	79.5424
1	1094	10.4146	4.09334	0.10679	0.434571	0.288032	73.3082
1	638.5	10.3706	5.18224	0.0623268	0.323056	0.22128	76.0929
1	758	5.51768	5.43442	0.0739917	0.402103	0.24153	87.0469
1	703.5	7.86724	5.33663	0.0686717	0.367098	0.225061	81.7005
1	873.5	6.34964	4.60266	0.0852662	0.391599	0.250581	70.7289
1	1068.5	50.3975	4.11531	0.104301	0.428165	0.278692	75.7658
1	721	8.24276	5.52161	0.07038	0.384884	0.225002	64.7362
1	1070	9.52985	4.47322	0.104447	0.465125	0.267155	77.2336
1	694	4.34111	5.14564	0.0677444	0.347832	0.228713	84.7396
1	691.5	6.25652	5.55049	0.0675004	0.375938	0.23609	74.625
1	1015.5	18.5665	4.47186	0.0991274	0.441759	0.280257	86.1177
1	1029	7.20989	4.2449	0.100445	0.427097	0.290975	82.782
1	871	12.804	4.77045	0.0850221	0.4048	0.272892	67.4397
1	733.5	25.286	5.10897	0.0716002	0.363184	0.243631	72.1256
1	874.5	8.37439	4.84433	0.0853638	0.410783	0.25194	75.6301
1	1062	6.79495	4.66502	0.103666	0.483392	0.277005	82.0301
1	948.5	5.20252	4.4499	0.0925873	0.408876	0.263293	69.175
1	721	8.20705	5.20755	0.07038	0.364071	0.223237	80.2872
1	805	4.84817	4.81807	0.0785796	0.377795	0.241908	81.2038
1	621.5	6.27111	6.1611	0.0606674	0.373451	0.214792	56.7111
1	912	16.1794	4.84841	0.0890243	0.430419	0.274518	75.2147
1	1008.5	8.13321	4.11296	0.0984441	0.403904	0.289503	81.2209
1	961.5	8.07661	4.59577	0.0938562	0.431339	0.25198	86.9593
1	1214.5	11.9385	4.02562	0.118553	0.476527	0.285197	78.1181
1	648	5.69183	5.53722	0.0632541	0.346365	0.20735	78.3119
1	756.5	13.7379	5.22468	0.0738453	0.383711	0.252629	76.3434
1	637	6.24998	5.99875	0.0621804	0.371788	0.210489	70.5378
1	803	8.46662	4.74592	0.0783844	0.370315	0.233863	70.3633
1	762.5	5.26928	5.23023	0.074431	0.384778	0.223109	69.7291
1	963	31.8615	4.46895	0.0940027	0.416468	0.268233	61.0568
1	946	19.9808	4.27434	0.0923432	0.39281	0.275151	80.0749
1	694	10.2252	5.45374	0.0677444	0.369764	0.226655	75.2058
1	966.5	29.9138	4.38	0.0943443	0.412552	0.281909	76.7175
1	831.5	7.30642	5.0067	0.0811664	0.406271	0.247	63.6698
1	766.5	17.144	5.62411	0.0748214	0.421273	0.220141	67.4835
1	690	4.07297	4.92652	0.0673539	0.331786	0.255316	79.5368
1	814	9.98823	4.75328	0.0794581	0.376265	0.245312	85.6627
1	835	4.64745	4.67247	0.081508	0.380732	0.24206	83.2447
1	1291.5	9.03051	3.97976	0.126069	0.501232	0.293985	79.8361
1	727.5	5.72766	4.9398	0.0710145	0.348566	0.23014	64.7291
1	901.5	10.5769	4.45517	0.0879994	0.39129	0.262823	60.2368
1	1181.5	7.19269	4.13118	0.115331	0.475021	0.282712	85.9184
1	920.5	15.2341	4.65465	0.0898541	0.415362	0.247962	82.5119
1	1097.5	5.88135	4.06843	0.107132	0.433181	0.284918	81.3726
1	539.5	6.31355	6.21309	0.052663	0.325677	0.184949	78.0806
1	962.5	8.61226	4.58096	0.0939539	0.43019	0.260232	75.0525
1	912	4.94851	4.39985	0.0890243	0.391124	0.265196	84.309
1	1025.5	14.2712	4.5906	0.100104	0.459382	0.255442	82.8941
1	688	17.6193	5.68666	0.0671587	0.37885	0.213426	76.6764
1	1111	23.9809	4.22739	0.10845	0.457753	0.296205	77.1234
1	685	6.35487	5.22596	0.0668659	0.347818	0.217789	80.8299
1	875	14.8915	4.75659	0.0854126	0.40405	0.246029	78.0556
1	1099.5	9.66861	4.11454	0.107327	0.441484	0.290434	84.4099
1	776.5	5.79501	5.17329	0.0757976	0.391843	0.22862	87.8006
1	862	11.0417	4.59003	0.0841436	0.386288	0.259636	84.9914
1	1053	13.8432	4.37307	0.102788	0.448955	0.267946	79.1075
1	579	15.245	5.6201	0.0565187	0.31762	0.203907	37.4272
1	724	19.9996	4.69322	0.0706728	0.330939	0.253396	84.1726
1	1087.5	29.735	4.15384	0.106156	0.439711	0.298805	76.1224
1	974.5	12.7729	4.54443	0.0951252	0.433996	0.268252	81.7044
1	891.5	6.25931	4.52072	0.0870232	0.393249	0.247395	67.6464
1	963	11.3827	4.44919	0.0940027	0.415903	0.272929	69.4977
1	800.5	29.9728	4.85383	0.0781403	0.379242	0.254437	78.096
1	933	4.91924	4.6311	0.0910742	0.421796	0.267989	70.7771
1	1081.5	12.9762	4.2164	0.10557	0.442452	0.289151	79.4785
1	1035.5	5.98614	4.18319	0.10108	0.422193	0.267552	84.6114
1	583	4.45939	5.6056	0.0569092	0.318285	0.20693	81.7438
1	1122.5	17.9592	4.29561	0.109572	0.465605	0.292252	84.6027
1	1041.5	11.5831	4.09624	0.101665	0.416419	0.292225	76.7998
1	737.5	9.39679	4.82851	0.0719906	0.346925	0.255133	74.2371
1	964	7.38503	4.56151	0.0941003	0.429166	0.258109	83.7023
1	905	8.13381	4.58595	0.088341	0.401343	0.253575	81.1227
1	1035	23.8232	4.27316	0.101031	0.430686	0.283072	82.3578
1	949.5	9.16204	4.67083	0.0926849	0.431612	0.25688	81.631
1	784	7.9357	5.21313	0.0765297	0.393777	0.244606	84.0735
1	1135.5	21.58	3.95915	0.110841	0.438521	0.294714	83.0545
1	888.5	9.4841	4.63311	0.0867304	0.401264	0.251217	78.0821
1	1139.5	7.15278	4.22842	0.111232	0.468539	0.273211	84.6923
1	996.5	33.9036	4.1226	0.0972727	0.400658	0.283447	53.4972
1	704.5	12.1033	5.77163	0.0687693	0.396148	0.230495	72.0471
1	682	5.63608	5.72937	0.066573	0.380159	0.218641	82.0971
1	880	10.938	4.47218	0.0859007	0.384916	0.269393	58.9905
1	841.5	9.28829	4.69818	0.0821425	0.391216	0.271261	39.1106
1	975.5	22.8667	4.6325	0.0952228	0.441317	0.268216	72.1902
1	814	4.70914	5.24947	0.0794581	0.415409	0.226102	85.9672
1	682	14.8117	5.50647	0.066573	0.366038	0.211041	85.0479
1	811	62.6329	5.04741	0.0791653	0.399624	0.220812	76.6067
1	984	12.084	4.28071	0.0960526	0.408463	0.28386	84.1399
1	812	9.76343	4.84721	0.0792629	0.382723	0.233962	84.9621
1	1222.5	10.072	4.22454	0.119334	0.500147	0.281975	79.722
1	1127	10.1421	4.2917	0.110011	0.471742	0.282273	70.6978
1	1142	14.5774	4.29197	0.111476	0.476987	0.300917	77.0366
1	758	6.53165	5.23247	0.0739917	0.382903	0.225359	86.5198
1	1078	20.201	4.30553	0.105228	0.4497	0.276714	74.8599
1	1028.5	10.8082	4.44466	0.100396	0.444056	0.276546	82.6717
1	828	44.8306	5.02882	0.0808247	0.405117	0.276098	69.4505
1	930	21.8976	4.88698	0.0907814	0.443918	0.250376	74.5645
1	749	10.3752	5.28702	0.0731132	0.390873	0.237719	88.8547
1	982.5	5.57346	4.29501	0.0959061	0.411518	0.283258	71.977
1	966	11.8424	4.55592	0.0942955	0.428958	0.287201	65.1387
1	962	19.2075	5.22943	0.0939051	0.485888	0.284195	78.1607
1	1058.5	22.906	4.32923	0.103325	0.447239	0.265196	75.0806
1	978.5	21.9224	4.50723	0.0955157	0.424236	0.292771	78.0179
1	725	17.576	5.49719	0.0707704	0.385533	0.214125	77.0176
1	1047.5	23.7997	4.51785	0.102251	0.459788	0.29954	66.588
1	706.5	6.86021	5.39979	0.0689646	0.372226	0.22207	67.902
1	830	8.51942	4.57063	0.08102	0.370064	0.262215	84.0869
1	945.5	21.7057	4.23982	0.0922944	0.389359	0.281991	75.6598
1	784	7.27923	4.88227	0.0765297	0.373645	0.24118	88.6067
1	904.5	32.4922	4.71086	0.0882922	0.415329	0.253677	65.0725
1	836	14.1807	4.94922	0.0816056	0.403858	0.227776	78.5675
1	1006.5	8.62258	4.42376	0.0982489	0.431612	0.255509	79.1948
1	1110.5	19.6739	3.9093	0.108401	0.423514	0.2964	66.5517
1	752.5	18.3649	5.24213	0.0734548	0.384974	0.226269	72.3565
1	1098.5	6.44142	4.31696	0.107229	0.462058	0.273608	81.6177
1	615.5	4.44154	5.33253	0.0600817	0.319446	0.204597	65.7358
1	782.5	6.37251	5.19663	0.0763833	0.397803	0.248155	76.3647
1	895.5	14.4375	4.55796	0.0874137	0.398254	0.245509	82.2694
1	875.5	5.38253	4.34953	0.0854614	0.37089	0.252351	81.6249
1	1033.5	13.2489	4.31325	0.100884	0.431903	0.284466	76.9507
1	1130	17.1992	4.12357	0.110304	0.4548	0.293833	68.1882
1	772	8.06236	4.8634	0.0753583	0.365634	0.22665	57.5072
1	998.5	8.07952	4.41608	0.097468	0.429411	0.259328	81.9269
1	609	8.08332	6.08037	0.0594472	0.361313	0.199273	86.4936
1	994.5	5.66678	4.46359	0.0970775	0.431734	0.273211	85.1313
1	1102	7.16547	4.42904	0.107571	0.474317	0.27664	67.5
1	900.5	15.9372	4.41613	0.0879018	0.384233	0.274777	79.9103
1	1018.5	15.4041	4.16359	0.0994203	0.414006	0.284805	83.0144
1	990.5	6.007	4.34614	0.0966871	0.418752	0.267112	81.1749
1	931.5	25.8599	4.29341	0.0909278	0.388538	0.288197	71.9314
1	557	5.96774	6.13002	0.0543712	0.333043	0.191167	77.6285
1	794	12.4356	4.67775	0.0775058	0.359753	0.269327	68.9015
1	996	12.0978	4.54492	0.0972239	0.440948	0.253468	77.7913
1	1032.5	14.4104	4.36648	0.100787	0.440014	0.269663	74.1961
1	785	20.3104	4.81977	0.0766273	0.369079	0.234726	46.3013
1	1083	6.50183	4.38318	0.105716	0.461427	0.28652	73.6091
1	728.5	8.68841	5.5342	0.0711121	0.393699	0.227869	86.2848
1	874.5	4.60822	4.5682	0.0853638	0.389183	0.259356	74.5649
1	1105.5	24.5444	4.04578	0.107913	0.436452	0.288253	85.0999
1	996.5	9.44769	4.54588	0.0972727	0.44019	0.259991	69.6916
1	1022	27.5558	4.5346	0.0997619	0.451622	0.2717	71.9467
1	1050	9.4878	4.34828	0.102495	0.445289	0.268342	86.3808
1	806.5	27.0819	4.61418	0.078726	0.36288	0.287506	65.3027
1	1013	7.56568	4.2398	0.0988834	0.419122	0.278692	82.4781
1	708.5	9.51348	5.67111	0.0691598	0.388903	0.210168	76.4804
1	763.5	11.5459	5.27148	0.0745286	0.391789	0.237438	77.7441
1	971	18.5238	4.38331	0.0947836	0.415348	0.281713	88.5986
1	1076.5	31.6669	4.58162	0.105082	0.481487	0.290012	72.2002
1	1025	17.336	4.21734	0.100055	0.418199	0.278127	78.3633
1	985.5	17.0132	4.85381	0.096199	0.466403	0.25194	77.5972
1	781	14.4368	5.2812	0.0762368	0.397695	0.220556	81.9406
1	785	13.5047	5.1292	0.0766273	0.392569	0.245321	82.095
1	818	8.23523	5.12837	0.0798486	0.407994	0.233163	74.1366
1	1088	9.67367	4.09236	0.106204	0.434605	0.276992	69.0743
1	702	16.739	5.49729	0.0685253	0.375091	0.228428	83.3814
1	896.5	5.89981	4.22996	0.0875113	0.36927	0.272079	65.216
1	776	5.03367	4.85976	0.0757488	0.367733	0.261053	76.874
1	1017	5.99645	4.293	0.0992738	0.424862	0.289444	81.1323
1	1000.5	6.15293	4.45094	0.0976632	0.434417	0.262632	75.9056
1	938	36.1331	4.48954	0.0915623	0.411455	0.264088	77.9873
1	634.5	7.55962	5.25647	0.0619363	0.325101	0.237219	45.8727
1	1131.5	9.4494	4.35181	0.110451	0.477861	0.280427	87.6432
1	879	26.7317	4.91439	0.0858031	0.420642	0.243765	79.1392
1	1002	11.5218	4.31678	0.0978096	0.420323	0.27934	77.3427
1	496.5	3.2054	5.69989	0.0484655	0.27619	0.193179	81.8602
1	716	9.50126	5.4721	0.0698919	0.380636	0.2223	76.5021
1	1135	9.86789	4.09036	0.110792	0.453071	0.277005	85.0864
1	1008.5	21.8505	4.54324	0.0984441	0.444857	0.276869	57.4924
1	1071	13.2038	4.3294	0.104545	0.452306	0.27185	78.5649
1	595	39.1117	5.88413	0.0580806	0.341777	0.201513	86.2932
1	777	4.94743	4.69456	0.0758464	0.354612	0.239453	78.8099
1	756.5	15.8614	5.3642	0.0738453	0.398135	0.2234	80.0646
1	918.5	17.4404	4.80001	0.0896588	0.429787	0.283076	72.8683
1	1074.5	13.5829	4.48577	0.104887	0.467972	0.26676	80.1842
1	974	26.7812	4.60571	0.0950764	0.436843	0.266859	62.7377
1	578	6.61717	5.59786	0.0564211	0.315038	0.215889	75.3419
1	906.5	8.11202	4.49363	0.0884875	0.397243	0.26182	73.7644
1	718	29.906	5.56173	0.0700871	0.387445	0.247062	56.3343
1	677.5	11.9058	5.80313	0.0661338	0.383728	0.217023	76.9314
1	942	13.2421	4.72438	0.0919528	0.434553	0.261112	81.8774
1	822.5	15.2373	5.03136	0.0802878	0.399956	0.238057	72.5931
1	859.5	6.60779	4.7592	0.0838996	0.398372	0.237219	79.7153
1	915	24.1964	4.62457	0.0893172	0.41186	0.26102	74.6514
1	1057.5	10.3235	4.26545	0.103227	0.439733	0.279177	67.3185
1	940	18.1788	4.61643	0.0917575	0.424385	0.280358	77.4199
1	1035.5	10.6994	4.1128	0.10108	0.41615	0.289894	83.8933
1	839.5	8.26895	4.92991	0.0819473	0.402723	0.239774	82.0273
1	837.5	7.60514	4.83288	0.0817521	0.390506	0.263382	58.7101
1	1049.5	18.1114	4.21752	0.102446	0.429735	0.279894	67.8932
1	797	30.1376	5.12902	0.0777987	0.398808	0.256931	60.8707
1	753.5	10.8157	5.31669	0.0735524	0.389938	0.22579	84.7292
1	1027	23.6411	4.4866	0.10025	0.448033	0.301784	74.9576
1	820	8.58515	4.86218	0.0800438	0.389064	0.233815	84.3911
1	874.5	7.45604	4.94312	0.0853638	0.422426	0.272646	70.4635
1	814	9.9449	4.99698	0.0794581	0.397174	0.243765	75.0925
1	924	8.54534	4.51973	0.0901957	0.406912	0.259809	86.4004
1	1036	7.71605	4.13203	0.101129	0.417396	0.272185	74.7501
1	1074	19.5066	4.54234	0.104838	0.472574	0.29206	69.0546
1	697.5	4.80735	4.88944	0.068086	0.332634	0.224971	78.6325
1	723.5	5.59965	5.5474	0.070624	0.391776	0.233962	81.1627
1	885.5	10.1487	4.68247	0.0864376	0.40417	0.248922	66.7323
1	912.5	9.28238	4.89197	0.0890731	0.434884	0.267233	76.901
1	872.5	32.2234	4.82559	0.0851686	0.413515	0.270105	80.0734
1	776	18.6545	5.09807	0.0757488	0.386594	0.243368	81.2472
1	604.5	12.6336	5.88647	0.0590079	0.345989	0.219686	65.0457
1	801.5	11.0264	5.26406	0.0782379	0.411959	0.242211	80.7782
1	1267.5	9.01858	4.01567	0.123726	0.49557	0.301579	80.7757
1	961	11.0599	4.54328	0.0938074	0.425558	0.270014	79.579
1	1047	16.4716	4.38119	0.102202	0.447994	0.28957	72.2058
1	962.5	9.34438	4.82776	0.0939539	0.453616	0.264085	87.0248
1	1006.5	8.80059	4.13319	0.0982489	0.407332	0.2983	77.2602
1	882.5	16.6508	4.43352	0.0861447	0.381245	0.283447	73.9549
1	995	10.2172	4.37751	0.0971263	0.424994	0.253564	76.7175
1	986.5	11.64	4.34604	0.0962966	0.418159	0.277219	69.8685
1	1022	5.93939	4.13404	0.0997619	0.411738	0.280846	69.0231
1	762	5.89456	5.18207	0.0743822	0.38553	0.238825	80.563
1	940.5	7.38539	4.62131	0.0918063	0.424265	0.269393	81.0495
1	963	18.3307	4.59076	0.0940027	0.431658	0.295243	78.3495
1	1008.5	32.6841	4.35802	0.0984441	0.430779	0.29843	63.7731
1	823	8.02664	4.75796	0.0803367	0.381546	0.274645	53.0466
1	889	8.38674	4.48485	0.0867792	0.389097	0.258201	73.8527
1	853	19.3144	5.04001	0.0832651	0.419068	0.276579	69.824
1	902	18.9124	4.56098	0.0880482	0.395898	0.277273	68.8608
1	388	4.53678	6.75434	0.0378744	0.255818	0.178223	62.3207
1	934.5	40.4554	4.93863	0.0912207	0.446482	0.252258	74.6397
1	889.5	9.21841	4.70849	0.086828	0.407223	0.254486	83.6423
1	681.5	10.6271	5.33312	0.0665242	0.353328	0.21736	72.4744
1	991	9.53615	4.71525	0.0967359	0.451559	0.253692	83.4653
1	829.5	16.5054	5.05886	0.0809711	0.40784	0.265269	69.7594
1	1010.5	13.1125	4.34929	0.0986394	0.428872	0.291948	79.3371
1	890	8.83965	4.50516	0.0868768	0.391765	0.255393	63.1634
1	1056	9.58193	4.3814	0.103081	0.451412	0.26182	80.9691
1	973.5	5.34974	4.6684	0.0950276	0.440384	0.247365	87.713
1	841.5	13.1068	4.83114	0.0821425	0.394477	0.2699	65.367
1	927.5	6.77055	4.47711	0.0905374	0.401992	0.272506	80.384
1	907.5	8.65499	4.61862	0.0885851	0.404724	0.265046	83.873
1	1069.5	11.3425	4.28222	0.104399	0.444559	0.2744	77.6124
1	977.5	14.2892	4.647	0.0954181	0.442143	0.276088	84.5958
1	1038.5	10.5851	4.17233	0.101373	0.420299	0.28333	84.2074
1	880	5.92886	4.49742	0.0859007	0.385878	0.292022	57.1045
1	1030.5	4.95989	4.6105	0.100592	0.463586	0.26676	78.9168
1	1003	5.62882	4.21896	0.0979072	0.412471	0.271054	83.1128
1	915	34.051	4.78802	0.0893172	0.427075	0.260846	78.7155
1	1031	9.72086	3.99369	0.10064	0.39902	0.291551	84.6902
1	792	5.18206	5.02898	0.0773106	0.389216	0.247206	72.5574
1	712.5	6.70757	5.13854	0.0695503	0.357177	0.219065	80.5537
1	533.5	11.9255	6.52867	0.0520773	0.342728	0.188204	86.8277
1	1034	38.3047	4.4138	0.100933	0.445726	0.278908	73.6962
1	951.5	8.8411	4.42691	0.0928801	0.411214	0.262199	78.4043
1	1011.5	6.48854	4.60999	0.098737	0.454953	0.265074	86.5677
1	716.5	8.67961	5.10032	0.0699407	0.356639	0.231786	55.7314
1	1116.5	8.78663	4.09614	0.108986	0.446641	0.282984	78.7549
1	1065.5	15.395	4.27441	0.104008	0.441023	0.27844	86.5606
1	840	6.12701	4.50428	0.0819961	0.367676	0.263357	63.125
1	796	4.40631	4.78506	0.0777011	0.371564	0.273317	69.6994
1	1072.5	12.3201	4.0872	0.104691	0.426388	0.273976	70.5531
1	1116	11.1157	4.16506	0.108938	0.453409	0.268216	64.5684
1	784	27.5704	4.76163	0.0765297	0.362995	0.26182	62.7688
1	898.5	7.03629	4.52906	0.0877065	0.396411	0.281296	72.1061
1	991	10.7724	4.541	0.0967359	0.437873	0.250161	86.5497
1	970.5	22.3204	4.33204	0.0947348	0.410041	0.294303	65.1212
1	1037	36.0446	4.37845	0.101226	0.443323	0.282229	79.702
1	801.5	5.8811	5.10367	0.0782379	0.398688	0.233885	82.3724
1	1040.5	8.40265	4.44189	0.101568	0.450545	0.266609	87.1298
1	917.5	12.0158	4.60121	0.0895612	0.412228	0.279894	66.7364
1	759.5	7.50133	5.26832	0.0741381	0.389472	0.2223	81.0006
1	821.5	38.3689	5.02289	0.0801902	0.400522	0.250517	60.6643
1	1149	10.2032	4.07796	0.112159	0.454631	0.29273	87.3371
1	822.5	15.2816	4.55814	0.0802878	0.365208	0.256514	80.6756

## Sheet: phyb_nAT_A
Predicate	Pixel count	SSE	LS Ratio	Surface	Length	Width	Axes angle
1	889.333	22.9759	5.01435	0.0868117	0.434713	0.262821	74.4099
1	711.333	13.7608	5.31161	0.0694364	0.367296	0.250863	67.5365
1	962.333	34.6303	4.83037	0.0939376	0.452327	0.272738	78.5932
1	705.333	12.8375	5.83781	0.0688507	0.396327	0.241687	70.7331
1	945.667	28.9855	4.73163	0.0923107	0.43432	0.262078	83.2844
1	814.333	27.6771	5.34358	0.0794907	0.423415	0.259917	70.4445
1	857.333	28.2198	5.22351	0.0836881	0.435812	0.223624	67.3605
1	982.667	21.1512	5.12353	0.0959224	0.488168	0.253587	80.565
1	802.667	12.4887	5.21687	0.0783518	0.406425	0.253658	76.9818
1	808	16.185	5.32949	0.0788724	0.419359	0.252726	79.4415
1	717	23.9305	5.69571	0.0699895	0.398253	0.218732	61.1131
1	975	20.6588	4.7254	0.095174	0.449355	0.250323	79.1179
1	664.333	7.99658	5.45989	0.0648485	0.349727	0.227567	66.338
1	740	9.14236	5.73997	0.0722347	0.408013	0.23054	87.3947
1	748.333	29.7789	5.76468	0.0730481	0.41917	0.228489	61.6468
1	738	25.6044	5.35376	0.0720394	0.384872	0.237659	72.4071
1	804.667	16.0084	5.24275	0.0785471	0.409624	0.257468	81.7095
1	953.667	13.2519	5.30911	0.0930916	0.493442	0.247096	72.3531
1	784	8.94217	5.88601	0.0765297	0.449221	0.264802	59.0118
1	792.333	15.132	5.11475	0.0773431	0.394786	0.231175	67.7097
1	921.333	15.6383	4.86928	0.0899354	0.436281	0.273102	59.3696
1	907	14.6333	5.36786	0.0885363	0.455002	0.272264	85.0332
1	735.333	10.6816	5.4307	0.0717791	0.388926	0.226597	83.0651
1	762.333	16.3234	5.16757	0.0744147	0.383452	0.255409	51.9087
1	797.667	21.1652	5.2155	0.0778638	0.405303	0.246207	55.0438
1	829.333	30.0188	5.11899	0.0809549	0.414136	0.24295	77.9955
1	919.333	19.794	4.94064	0.0897402	0.434866	0.254991	65.3556
1	950.333	55.7487	5.04828	0.0927662	0.467714	0.270083	73.0965
1	748.333	26.0186	5.36936	0.0730481	0.389407	0.23843	75.4801
1	970.333	18.46	4.72619	0.0947185	0.444488	0.285485	76.7892
1	792.333	29.7698	5.18439	0.0773431	0.400491	0.269263	62.9817
1	767	20.0595	5.08013	0.0748702	0.378694	0.24582	83.195
1	725.333	18.1629	5.31972	0.070803	0.374857	0.222787	80.2425
1	939.667	17.3914	4.88376	0.091725	0.447365	0.260555	70.2131
1	1023.33	15.7013	4.75304	0.0998921	0.472415	0.268793	74.5867
1	883	16.393	4.80423	0.0861935	0.413182	0.248245	75.5619
1	937	10.3757	4.7914	0.0914647	0.438234	0.260242	72.6838
1	921.667	16.0941	4.94445	0.0899679	0.443782	0.256902	70.5165
1	889	65.4043	5.43426	0.0867792	0.46777	0.257695	73.0871
1	600.333	14.0868	6.54141	0.0586012	0.382732	0.230928	83.2035
1	802.333	28.9278	4.98405	0.0783193	0.390053	0.250121	54.847
1	874.333	18.1274	5.01032	0.0853475	0.42548	0.251521	66.5605
1	983	11.402	4.78931	0.095955	0.457212	0.266742	70.8216
1	622.667	20.8107	6.11292	0.0607812	0.370352	0.206369	66.5826
1	925.333	21.9619	4.94781	0.0903259	0.445111	0.261824	77.1318
1	952.667	13.0276	4.93398	0.092994	0.453206	0.250492	77.8302
1	843	25.4025	5.49638	0.0822889	0.450746	0.251199	60.1713
1	922.333	22.6778	4.84307	0.090033	0.435715	0.261281	79.8567
1	872.667	15.6308	5.15138	0.0851848	0.437205	0.276805	74.2795
1	743	20.7619	5.43891	0.0725275	0.392637	0.22737	78.1377
1	822.333	20.7483	5.11915	0.0802716	0.411046	0.250387	73.7871
1	699.667	11.4452	5.77703	0.0682975	0.390962	0.233046	76.4473
1	899.333	9.73459	4.97575	0.0877879	0.433776	0.251269	70.4719
1	684	11.4277	6.0737	0.0667682	0.401366	0.252563	74.8738
1	822.667	12.0579	5.13824	0.0803041	0.407987	0.244254	80.1515
1	889.667	45.1427	5.07344	0.0868443	0.439346	0.262849	69.5079
1	865.667	17.0299	5.26149	0.0845015	0.443451	0.253633	81.0372
1	738.333	8.91152	5.47241	0.072072	0.393999	0.250488	66.6645
1	841.667	12.8895	5.24062	0.0821588	0.430445	0.252497	83.1344
1	814.333	29.0326	5.39763	0.0794907	0.428626	0.240745	62.3996
1	725.333	17.3262	5.57871	0.070803	0.392853	0.226727	68.8235
1	984.667	8.63737	4.5878	0.0961176	0.43435	0.271562	83.513
1	629.333	6.28108	5.70192	0.061432	0.350786	0.233569	71.8702
1	837.667	16.3491	5.51151	0.0817683	0.450263	0.25966	60.4588
1	831.333	9.57631	4.75169	0.0811501	0.384227	0.259465	78.1779
1	1070	15.7139	4.62832	0.104447	0.482764	0.272886	70.0683
1	952.667	13.1212	4.74741	0.092994	0.4411	0.266531	64.0584
1	810	53.1363	5.52341	0.0790677	0.425387	0.241601	69.2131
1	821	21.5591	5.56072	0.0801414	0.44181	0.256611	67.1661
1	925.333	10.831	4.66474	0.0903259	0.421392	0.282612	77.1237
1	1006.33	36.6465	4.78692	0.0982326	0.469054	0.274495	53.184
1	964	14.1029	4.88867	0.0941003	0.45587	0.259839	72.2647
1	828.333	10.1663	4.91039	0.0808573	0.39673	0.256366	63.8486
1	975	33.6559	5.00278	0.095174	0.471665	0.282225	71.2915
1	877.333	18.3659	5.44715	0.0856404	0.465001	0.274137	69.0675
1	866.333	24.5842	5.32787	0.0845666	0.45075	0.238927	75.7724
1	870	13.432	5.15957	0.0849245	0.435391	0.265044	76.8052
1	778.667	13.7273	4.99991	0.0760091	0.379749	0.240885	78.1797
1	912.667	20.7645	4.88124	0.0890894	0.433478	0.251426	79.6084
1	801.667	7.64892	5.21452	0.0782542	0.402597	0.240005	75.0829
1	644.667	14.5024	5.60357	0.0629287	0.35149	0.224948	69.2842
1	970.333	12.3243	4.68715	0.0947185	0.439244	0.285792	74.3897
1	860.667	10.8374	4.90589	0.0840135	0.410126	0.247999	77.3098
1	846.667	23.7122	5.47724	0.0826469	0.452257	0.260417	78.3444
1	807.333	13.6324	5.63679	0.0788074	0.444232	0.257657	72.0533
1	684.667	17.1779	5.60333	0.0668333	0.373856	0.223396	68.7735
1	738.333	19.4168	5.88623	0.072072	0.409165	0.230343	68.4909
1	818.667	13.8326	5.109	0.0799137	0.405958	0.247	73.4653
1	839	16.1055	5.32032	0.0818985	0.433234	0.250142	79.1645
1	696	26.2407	5.55147	0.0679396	0.376346	0.23244	65.3045
1	791.667	29.4774	5.61815	0.0772781	0.433529	0.226124	65.5339
1	750	17.4339	5.64032	0.0732108	0.409689	0.248716	77.8326
1	927	15.8072	4.85701	0.0904886	0.436625	0.269167	77.2048
1	917	16.8739	5.16956	0.0895124	0.462651	0.265717	84.5529
1	923.667	11.4745	4.66944	0.0901632	0.420806	0.276624	72.3576
1	1000.33	28.7662	4.85495	0.0976469	0.471982	0.292285	68.642
1	780.667	56.8653	5.46147	0.0762043	0.412676	0.240762	72.7849
1	896	17.622	5.21013	0.0874625	0.455516	0.263467	75.4671
1	770.333	27.7216	5.73627	0.0751956	0.429459	0.255181	67.6543
1	863.667	13.5262	5.3784	0.0843063	0.453331	0.244197	68.1052
1	820.333	17.6394	5.46445	0.0800763	0.4369	0.258064	74.3036
1	846.333	14.7507	5.60278	0.0826143	0.46001	0.262783	63.8825
1	828.333	22.1578	5.27095	0.0808573	0.425619	0.258552	69.1742
1	678	8.71233	5.90992	0.0661826	0.386388	0.226287	61.445
1	1006.67	26.5749	5.25713	0.0982652	0.507247	0.276579	74.7834
1	846.667	12.9094	6.01392	0.0826469	0.492739	0.256364	85.8622
1	742.333	18.6898	5.41078	0.0724624	0.390309	0.25878	71.2242
1	726.667	11.9833	5.4526	0.0709331	0.386401	0.221046	76.5855
1	627.667	20.2359	5.70808	0.0612693	0.348257	0.216756	67.7051
1	1012.33	12.1697	4.72029	0.0988183	0.461957	0.266472	64.2092
1	1046.67	25.1545	4.65587	0.10217	0.47394	0.276382	82.2915
1	714.667	14.9768	5.7623	0.0697618	0.399238	0.232124	69.0471
1	1023.33	11.1301	4.85013	0.0998921	0.481452	0.278323	77.5564
1	927	18.8467	4.75175	0.0904886	0.428837	0.269008	58.6553
1	775	32.5547	5.46761	0.0756512	0.411106	0.231092	74.8876
1	852.667	20.6913	5.5215	0.0832325	0.456955	0.245158	81.0479
1	979.333	13.3691	4.89152	0.095597	0.46697	0.260189	82.8476
1	970.667	15.9945	4.86682	0.094751	0.460475	0.287318	65.4691
1	853	10.5666	5.35768	0.0832651	0.439674	0.251251	76.2624
1	817.667	22.8176	4.9838	0.079816	0.39629	0.258335	65.2391
1	922	12.6519	4.88617	0.0900005	0.439557	0.269246	79.6975
1	827	24.4962	5.00726	0.0807271	0.404006	0.248108	59.1211
1	820	17.319	4.98646	0.0800438	0.398713	0.244818	79.9062
1	1099	17.851	4.81771	0.107278	0.509737	0.27635	73.7287
1	951.333	33.6807	4.67385	0.0928638	0.433334	0.270533	74.6272
1	620	27.8592	5.99507	0.0605209	0.359995	0.219617	72.0177
1	960	8.31722	4.98569	0.0937098	0.461277	0.261936	74.1851
1	926	14.7848	5.15832	0.0903909	0.466117	0.257289	74.3248
1	702.333	14.8612	5.6064	0.0685578	0.383727	0.229578	55.4657
1	928.667	19.8215	4.85909	0.0906512	0.438933	0.275603	66.2385
1	460.333	17.4796	8.31464	0.0449352	0.351792	0.205215	69.4643
1	908.333	16.6029	4.83734	0.0886664	0.426669	0.244258	79.8304
1	696.333	28.7058	6.42681	0.0679722	0.427258	0.222285	74.1119
1	794.667	17.8846	5.42697	0.0775709	0.419608	0.229574	77.1009
1	902.667	10.6746	4.75309	0.0881133	0.417704	0.256798	58.71
1	948.667	17.0427	4.57025	0.0926035	0.422479	0.270112	67.6051
1	580.333	22.3922	6.49988	0.0566489	0.368185	0.204559	71.0184
1	661.667	36.3883	5.54905	0.0645882	0.355958	0.22591	72.1849
1	615.667	5.96947	5.99494	0.0600979	0.354593	0.222697	78.8358
1	804	16.9042	4.9784	0.078482	0.389976	0.246704	60.9438
1	912.333	19.0418	5.21801	0.0890569	0.46281	0.263569	81.9434
1	760.667	16.4646	5.43607	0.074252	0.400931	0.224519	68.7606
1	872.667	13.1015	5.13694	0.0851848	0.436938	0.250597	70.0444
1	1045.67	8.67743	4.52618	0.102072	0.4563	0.274338	73.7853
1	900.667	8.21593	4.79872	0.087918	0.420566	0.249375	72.6728
1	863.667	62.6533	5.35129	0.0843063	0.446203	0.271415	61.8987
1	846	9.57115	5.24156	0.0825818	0.431886	0.236276	65.5463
1	707	12.4935	5.64082	0.0690134	0.386943	0.229872	65.106
1	960.333	12.7261	4.75984	0.0937424	0.443305	0.26371	71.1133
1	861.667	10.4345	4.88619	0.0841111	0.409869	0.277516	67.5378
1	830.667	24.6797	5.15384	0.081085	0.415917	0.245997	56.8115
1	886.667	22.7661	5.10106	0.0865514	0.434278	0.252544	80.9883
1	752.333	27.2769	5.39822	0.0734386	0.388085	0.27321	70.617
1	768.667	16.7668	5.68254	0.0750329	0.425594	0.248007	76.3901
1	723.333	24.6319	5.58487	0.0706077	0.383946	0.248263	75.7261
1	747	7.78516	5.74903	0.072918	0.416671	0.248126	69.4607
1	750	13.3464	5.40935	0.0732108	0.392597	0.267079	73.4045
1	763.667	8.84673	5.12428	0.0745449	0.379189	0.240266	65.3507
1	838.333	28.1036	5.18586	0.0818334	0.422958	0.247	68.7094
1	858.333	11.5183	4.89343	0.0837857	0.407622	0.258793	66.6186
1	912	15.2026	5.14186	0.0890243	0.457531	0.254154	76.5076
1	674	22.4837	5.39614	0.0657921	0.351587	0.229411	60.875
1	812	32.6088	5.08553	0.0792629	0.402852	0.238258	76.5107
1	825.333	11.4198	5.1092	0.0805644	0.410958	0.250533	58.765
1	827.333	20.5405	5.59088	0.0807596	0.449969	0.255166	59.6817
1	923	8.92789	4.9711	0.0900981	0.436089	0.271387	79.987
1	925.333	12.1836	4.77107	0.0903259	0.429055	0.251433	68.9191
1	605	9.03514	6.34802	0.0590567	0.363053	0.223111	38.342
1	685	15.0602	5.82994	0.0668659	0.386878	0.220763	64.7511
1	929.667	15.91	4.65481	0.0907489	0.421905	0.264905	63.4771
1	535	7.44563	6.06118	0.0522237	0.315443	0.196345	70.5608
1	813.667	31.8916	5.50553	0.0794256	0.436323	0.234257	69.2844
1	710	22.0352	5.82857	0.0693062	0.395727	0.252422	73.1273
1	798.667	31.4542	5.55497	0.0779614	0.422716	0.244199	74.5339
1	901.333	45.3917	5.14451	0.0879831	0.449179	0.273694	68.0039
1	782.667	16.7481	5.63959	0.0763995	0.424081	0.249247	74.0661
1	949.667	19.6134	4.83678	0.0927011	0.447416	0.266913	81.7268
1	883	32.4422	4.98713	0.0861935	0.427066	0.261605	73.6518
1	749.667	14.6931	5.72404	0.0731783	0.410071	0.243385	58.1643
1	814.667	26.2005	5.30855	0.0795232	0.415275	0.266042	61.0421
1	839	13.551	5.09874	0.0818985	0.416909	0.244667	71.2284
1	779.667	20.6549	5.72321	0.0761067	0.422552	0.240125	75.0379
1	917.667	15.7126	4.78764	0.0895775	0.425557	0.262222	57.5946
1	947	18.9284	4.94973	0.0924408	0.45357	0.258704	79.1425
1	829	16.476	5.32337	0.0809223	0.429447	0.232002	74.7485
1	810.667	9.36336	4.91434	0.0791327	0.386525	0.235746	70.6496
1	923.667	30.589	4.44037	0.0901632	0.399434	0.28957	60.4744
1	942.667	15.1801	4.69148	0.0920178	0.427378	0.257629	72.9364
1	747	14.7723	6.04734	0.072918	0.436538	0.27161	74.5559
1	859	15.6307	5.23046	0.0838508	0.438591	0.241045	71.4187
1	850	40.7227	5.39341	0.0829722	0.44408	0.258339	57.7731
1	736.333	43.6212	5.78757	0.0718767	0.415648	0.256636	69.0044
1	773.333	19.3806	5.53666	0.0754885	0.416326	0.236561	76.4832
1	657.667	7.57525	6.36987	0.0641977	0.393877	0.236435	74.6615
1	662.333	14.3136	6.83376	0.0646533	0.421613	0.229918	62.7163
1	740.667	11.5407	5.2413	0.0722997	0.37929	0.236335	71.7522
1	876.333	34.7188	5.16108	0.0855428	0.440627	0.240622	72.9119
1	598.667	11.6142	6.55291	0.0584385	0.373279	0.223903	51.9515
1	796.333	27.5117	5.68817	0.0777336	0.441211	0.257073	61.2385
1	715.667	27.7167	5.78558	0.0698594	0.399423	0.235282	56.8885
1	886	15.7949	5.07001	0.0864864	0.428623	0.261069	52.3314
1	743	13.3799	6.30318	0.0725275	0.451973	0.250357	83.6701
1	1016.67	39.2958	4.81503	0.0992413	0.474808	0.278256	77.7207
1	780	21.8807	5.84842	0.0761392	0.437171	0.246026	75.5801
1	706.667	11.6515	5.69555	0.0689808	0.392607	0.23459	67.7584
1	896.667	23.5085	4.97963	0.0875276	0.43017	0.270509	58.3666
1	831.667	20.3151	4.91848	0.0811826	0.396528	0.268341	78.333
1	856.667	12.811	5.03532	0.083623	0.417972	0.264053	70.3603
1	787.333	12.56	5.22292	0.0768551	0.399924	0.262197	60.2544
1	933	18.5704	4.90761	0.0910742	0.441823	0.262559	72.4223
1	902.333	16.3836	4.97162	0.0880807	0.43418	0.251031	75.0616
1	887.667	42.1902	4.86004	0.0866491	0.41926	0.256633	71.7322
1	813.333	18.7663	4.97989	0.079393	0.392988	0.248977	59.8307
1	576.667	14.774	6.14414	0.056291	0.345648	0.201941	71.8459
1	659.333	30.2248	5.85098	0.0643604	0.375786	0.222699	68.2477
1	856.667	12.3281	5.46548	0.083623	0.454902	0.224015	82.9462
1	729	16.7392	5.91789	0.0711609	0.411958	0.269875	61.0868
1	854	13.5787	5.35205	0.0833627	0.442172	0.259714	67.3807
1	907.333	9.99834	4.77106	0.0885688	0.422189	0.263741	71.656
1	868.333	17.3185	5.14924	0.0847618	0.43604	0.263482	79.202
1	907.667	13.6251	5.1513	0.0886013	0.453864	0.239135	76.6595
1	1024.67	22.0959	4.70791	0.100022	0.470009	0.26131	80.2761
1	846.333	35.8434	5.04264	0.0826143	0.415521	0.241028	66.5671
1	806.333	10.8483	5.21205	0.0787097	0.40723	0.264398	59.7656
1	750	13.6924	5.58905	0.0732108	0.407392	0.228464	78.4399
1	650	8.44311	6.29637	0.0634494	0.39766	0.231356	63.9673
1	629.333	28.1625	6.37236	0.061432	0.38476	0.208649	72.7829
1	777.667	42.031	5.54111	0.0759115	0.416435	0.236093	59.7742
1	828.333	18.6694	5.85606	0.0808573	0.448237	0.260609	74.0188
1	583.333	6.34724	6.2638	0.0569417	0.355081	0.209778	77.375
1	915.333	14.9847	5.10571	0.0893497	0.455947	0.273102	72.4334
1	846.667	23.907	5.55643	0.0826469	0.457889	0.260447	70.2069
1	882.667	29.6735	4.90032	0.086161	0.421839	0.251162	77.9236
1	863.333	38.7889	5.27045	0.0842738	0.441128	0.248871	69.5303
1	912	11.1648	4.58117	0.0890243	0.406635	0.280981	67.8703
1	863.333	13.1461	5.12554	0.0842738	0.429178	0.250293	79.4502
1	762.667	19.3506	5.79026	0.0744472	0.428352	0.259165	72.6531
1	834.667	30.2191	4.95268	0.0814755	0.40343	0.2406	50.27
1	762	22.2086	5.54909	0.0743822	0.410252	0.231405	69.8931
1	897.667	15.2057	5.28707	0.0876252	0.453808	0.250165	73.1385
1	802.333	42.123	5.6263	0.0783193	0.435643	0.275354	56.9059
1	1077.67	14.6751	4.40351	0.105196	0.462088	0.275058	72.7694
1	715.333	13.0519	5.68404	0.0698268	0.396934	0.227052	56.0064
1	887	8.25099	4.61146	0.086584	0.396994	0.270678	61.8138
1	875	31.7387	5.19091	0.0854126	0.441471	0.258798	67.1217
1	639.667	20.0284	5.71673	0.0624407	0.3567	0.231719	76.6268
1	906.333	51.9915	4.84083	0.0884712	0.425259	0.264503	72.0534
1	1008	10.4792	4.70994	0.0983953	0.462256	0.25546	81.4187
1	837.333	16.5961	5.01464	0.0817358	0.406229	0.253706	60.6949
1	772.667	6.5512	5.58637	0.0754234	0.420732	0.233827	84.2097
1	927.333	7.9453	4.9172	0.0905211	0.443931	0.264591	77.9364
1	708.667	11.5767	5.38779	0.0691761	0.371623	0.234386	61.2473
1	804.333	27.1945	5.09579	0.0785145	0.400036	0.258401	73.0833
1	851.667	15.1042	4.9529	0.0831349	0.410661	0.23314	61.8692
1	873.667	30.1765	4.99897	0.0852824	0.424256	0.260338	71.0648
1	770.667	10.688	5.86269	0.0752282	0.427558	0.268279	78.4268
1	767.333	8.39655	5.78884	0.0749028	0.424528	0.275612	76.142
1	678.333	15.5112	5.32516	0.0662151	0.352662	0.231581	60.6206
1	945.667	19.4958	4.62288	0.0923107	0.426448	0.262499	73.749
1	916.667	7.96154	4.95315	0.0894799	0.437408	0.275232	71.4348
1	828.333	31.0742	5.01124	0.0808573	0.403029	0.250147	75.9972
1	809.333	16.941	5.44679	0.0790026	0.429282	0.289489	80.6037
1	795	24.746	5.61936	0.0776034	0.435831	0.247312	74.8553
1	858.667	9.84587	5.29852	0.0838182	0.443962	0.26372	73.3489
1	577.333	36.9838	6.83355	0.056356	0.384661	0.205864	75.8749
1	865.333	26.3119	5.23474	0.084469	0.429522	0.258784	80.1727
1	929	69.0867	5.24521	0.0906838	0.474981	0.263461	75.3468
1	802.333	11.1058	5.44133	0.0783193	0.422187	0.243049	70.4617
1	759	11.3275	5.34911	0.0740893	0.392497	0.238727	57.8102
1	734.667	30.4315	5.70763	0.071714	0.402257	0.242331	68.9466
1	1050	34.4823	4.50513	0.102495	0.460018	0.281482	54.0523
1	1016.67	42.5465	4.67044	0.0992413	0.462229	0.258518	76.3593
1	929	25.7138	4.92975	0.0906838	0.447053	0.256383	70.9573
1	913.667	12.1597	5.25117	0.089187	0.455625	0.284867	71.2023
1	863	25.2725	5.73334	0.0842412	0.469538	0.279126	80.0443
1	694	19.8331	5.82583	0.0677444	0.387658	0.23401	74.5624
1	870.333	29.6	5.40724	0.0849571	0.455193	0.247327	73.1869
1	623.333	23.7083	6.02935	0.0608463	0.365527	0.209546	68.2604
1	834	11.2486	5.72672	0.0814104	0.465586	0.246316	75.6922
1	773.667	37.8062	5.85788	0.075521	0.441894	0.258336	70.2902
1	842.333	19.817	5.3015	0.0822239	0.426764	0.255087	60.5704
1	832.667	13.013	5.06308	0.0812803	0.407455	0.263008	52.8898
1	980	25.915	4.71354	0.0956621	0.449831	0.262586	69.3147
1	707.667	19.8661	5.81643	0.0690785	0.396968	0.247931	65.7008
1	830.333	14.7733	5.55135	0.0810525	0.445414	0.255527	78.3696
1	742.667	13.2845	5.57208	0.072495	0.398096	0.228296	81.814
1	1073	10.5806	4.48311	0.10474	0.468263	0.270327	83.366
1	977	13.9223	5.01081	0.0953693	0.469675	0.276051	78.2352
1	807	28.608	5.10973	0.0787748	0.401945	0.250963	72.6861
1	1029.33	11.6631	4.77167	0.100478	0.476704	0.273743	79.1142
1	934	23.8994	5.24728	0.0911719	0.477774	0.237455	79.7636
1	834.667	14.7832	5.30281	0.0814755	0.431832	0.253865	77.5918
1	1121.67	32.2725	4.49251	0.109491	0.491896	0.293184	77.0237
1	726.333	22.35	5.95079	0.0709006	0.41849	0.268876	57.0619
1	670.667	11.1796	5.85808	0.0654667	0.382595	0.218448	68.3856
1	881	12.1419	5.12074	0.0859983	0.433909	0.267384	74.0163
1	878.333	10.3718	4.97916	0.085738	0.425905	0.243132	75.335
1	760.333	8.61367	5.4315	0.0742195	0.399078	0.242891	76.8824
1	856	21.7459	5.32667	0.0835579	0.443518	0.260173	61.2481
1	862	9.02213	4.9075	0.0841436	0.410481	0.24481	77.5723
1	952.667	11.4353	4.82475	0.092994	0.44777	0.272339	81.8619
1	1003.33	19.3442	4.62965	0.0979398	0.452254	0.271446	69.1715
1	804.333	11.6238	5.19859	0.0785145	0.406291	0.244079	77.9028
1	761.667	28.1435	5.3542	0.0743496	0.396067	0.241623	73.8581
1	880	13.8137	4.99791	0.0859007	0.428759	0.267004	71.3333
1	878.333	35.9224	5.08158	0.085738	0.433437	0.268007	68.444
1	922	33.5971	4.8674	0.0900005	0.438072	0.265717	71.4658
1	792	12.4295	5.41483	0.0773106	0.418227	0.250987	73.9747
1	968.333	48.3636	5.12952	0.0945233	0.482259	0.261586	76.1541
1	740.333	10.3111	5.31937	0.0722672	0.381571	0.226859	58.319
1	949.667	12.3813	4.83248	0.0927011	0.444034	0.278489	80.3648
1	805.333	9.23071	5.80074	0.0786121	0.455673	0.269552	65.1794
1	750.667	58.3543	5.67151	0.0732759	0.407832	0.235145	76.6104
1	935	39.0331	4.92517	0.0912695	0.448304	0.254571	78.834
1	660	13.8722	6.51717	0.0644255	0.418338	0.240759	70.3926
1	723	12.3686	5.63518	0.0705752	0.397801	0.229937	76.9181
1	992.667	9.30219	4.60553	0.0968986	0.442718	0.275535	75.9027
1	773.333	15.9318	5.3061	0.0754885	0.394257	0.24076	68.7514
1	820.667	13.0579	5.61021	0.0801089	0.430517	0.26156	62.603
1	712.333	26.9204	5.74936	0.069534	0.395935	0.234991	52.2006
1	720.667	22.2805	6.15895	0.0703474	0.426337	0.248305	66.3046
1	712.333	40.5101	5.49432	0.069534	0.37949	0.228201	47.4373
1	944.333	21.4934	4.77521	0.0921805	0.435147	0.26884	70.3695
1	723.333	12.8152	5.33586	0.0706077	0.371447	0.256035	60.3415
1	656.333	13.774	6.2736	0.0640676	0.399984	0.226432	75.1906
1	780.333	25.8599	5.81715	0.0761718	0.437408	0.246756	73.7957
1	801	19.7652	5.18132	0.0781891	0.401361	0.234951	74.2265
1	1008.33	33.4778	5.03849	0.0984279	0.494889	0.254679	82.0059
1	1047	48.0768	4.87955	0.102202	0.496107	0.266095	61.3029
1	912.667	44.2797	4.94053	0.0890894	0.439735	0.268433	64.6457
1	946	12.0731	4.58241	0.0923432	0.421379	0.276914	71.5004
1	732	29.179	6.35565	0.0714537	0.45176	0.220595	58.529
1	690	36.7108	6.0645	0.0673539	0.406598	0.22663	70.4164
1	797.333	32.6408	5.27845	0.0778312	0.408722	0.273042	72.3659
1	783.667	28.17	5.5429	0.0764971	0.424568	0.268966	54.5319
1	871.667	18.4268	5.20372	0.0850872	0.438248	0.255387	73.5862
1	742.667	13.3214	5.16834	0.072495	0.374424	0.258247	75.189
1	977.667	16.4249	4.76516	0.0954343	0.453103	0.277004	71.3334
1	784.667	13.7613	5.68611	0.0765948	0.431938	0.247856	72.2384
1	837.667	11.8244	5.45989	0.0817683	0.44254	0.271155	74.3156
1	612.667	27.6654	6.51418	0.0598051	0.382195	0.210302	82.9491
1	706.333	13.9903	6.25284	0.0689483	0.42555	0.22274	86.8345
1	938	16.2712	4.8168	0.0915623	0.43823	0.266053	75.209
1	868	11.6626	5.04072	0.0847293	0.425867	0.25745	70.412
1	870.333	15.3403	5.30582	0.0849571	0.449351	0.259747	60.159
1	818.667	21.2302	5.33253	0.0799137	0.425931	0.256633	75.6249
1	790.667	19.4875	5.28073	0.0771805	0.407211	0.254677	76.1868
1	896	17.6932	4.97035	0.0874625	0.430845	0.259876	67.7452
1	892	14.6898	4.92513	0.087072	0.428322	0.270623	77.6714
1	928.667	15.9094	5.1039	0.0906512	0.461863	0.249043	66.3726
1	879.667	18.663	4.68731	0.0858681	0.3995	0.273371	73.9293
1	872.333	23.6375	4.98096	0.0851523	0.421363	0.251342	73.0945
1	620.333	15.5289	6.44909	0.0605535	0.388258	0.220991	69.3201
1	866.667	21.3153	5.35646	0.0845991	0.44872	0.25913	77.7945
1	995.333	11.9898	4.7764	0.0971589	0.455713	0.265757	75.1195
1	807	11.3613	5.12711	0.0787748	0.401342	0.260964	84.0735
1	863	15.3128	4.76809	0.0842412	0.400247	0.259615	72.5503
1	1093.67	35.3222	4.81848	0.106758	0.5133	0.29731	76.2206
1	911.333	16.0907	4.83196	0.0889593	0.42667	0.254555	83.849
1	937.333	16.7382	4.62848	0.0914972	0.421711	0.278277	75.7078
1	922.333	13.2149	4.99924	0.090033	0.43639	0.262995	72.6744
1	883.333	16.1627	5.13099	0.0862261	0.437379	0.273807	79.8603
1	715	10.8434	5.29506	0.0697943	0.368753	0.235063	53.6507
1	928.333	22.4044	5.20945	0.0906187	0.469002	0.271749	62.9053
1	916	9.40811	4.56833	0.0894148	0.404629	0.257407	61.2404
1	1030	28.8449	4.63767	0.100543	0.462359	0.279242	77.503
1	942	10.7045	4.60178	0.0919528	0.42136	0.279933	71.3786
1	950	28.1529	5.10607	0.0927337	0.46865	0.26737	78.8252
1	915	39.0135	4.99723	0.0893172	0.442165	0.271685	70.6871
1	865.333	16.0421	5.09526	0.084469	0.430188	0.257219	78.3704
1	997	21.9937	4.96222	0.0973216	0.481829	0.269956	84.615
1	863.333	36.4564	4.91484	0.0842738	0.413233	0.262783	69.1796
1	787	15.0014	5.61577	0.0768225	0.431352	0.251321	83.1094
1	710	9.83209	5.64394	0.0693062	0.389418	0.22268	75.8778
1	884.667	13.7328	4.95603	0.0863562	0.426651	0.244714	72.7902
1	675	25.2442	6.13427	0.0658897	0.394226	0.218743	63.4986
1	451.333	8.09054	7.09448	0.0440566	0.311015	0.166237	79.7692
1	485.667	20.7965	8.31749	0.0474081	0.378583	0.206214	75.6347
1	893.667	11.7763	5.02343	0.0872347	0.429712	0.26481	62.401
1	941	27.9146	5.04141	0.0918551	0.452226	0.27107	79.4782
1	914.667	22.7975	5.0274	0.0892846	0.44617	0.25787	83.6755
1	816.333	32.4659	5.33117	0.0796859	0.4235	0.252557	69.8113
1	809.333	20.1712	5.46509	0.0790026	0.427226	0.236133	72.3493
1	898.333	39.0797	5.11506	0.0876903	0.444443	0.261753	63.9772
1	1045.33	13.7806	4.58905	0.10204	0.466545	0.281237	81.9046
1	885	37.8099	5.3393	0.0863887	0.45578	0.270643	70.493
1	930	16.2865	4.94342	0.0907814	0.445608	0.263529	71.8664
1	633.667	24.7481	7.13866	0.061855	0.426077	0.221957	76.8286
1	841.333	45.1627	5.20132	0.0821262	0.42199	0.257083	72.8453
1	692.667	13.8234	6.56017	0.0676142	0.440308	0.245387	70.1537
1	895	10.6292	5.265	0.0873649	0.452409	0.251355	79.415
1	561.667	24.6678	6.27655	0.0548268	0.335783	0.209785	78.4112
1	910.667	13.5417	5.0146	0.0888942	0.445579	0.26361	74.6013
1	774.333	22.6044	5.53645	0.0755861	0.415916	0.253396	71.6603
1	771	15.4932	5.39445	0.0752607	0.400065	0.24355	65.7924
1	925.333	17.8768	4.84982	0.0903259	0.436784	0.281783	78.0529
1	769	17.4233	5.3776	0.0750655	0.401846	0.251895	69.3575
1	749.333	21.3392	5.46155	0.0731457	0.399211	0.233718	65.3802
1	930	12.675	4.77832	0.0907814	0.433038	0.261353	73.1578
1	728.333	29.6304	6.38474	0.0710958	0.453581	0.24059	80.9449
1	822.333	55.0717	5.94585	0.0802716	0.466695	0.255018	81.0893
1	1026.33	15.6576	4.65597	0.100185	0.464616	0.272626	85.0382
1	983	13.1578	4.82931	0.095955	0.461119	0.280461	72.62
1	841.333	19.8963	5.32709	0.0821262	0.431709	0.257039	70.5952
1	820.667	32.9241	5.29389	0.0801089	0.424004	0.265975	65.9972
1	946.333	9.52647	4.69241	0.0923758	0.430175	0.269263	70.232
1	900	23.985	5.40343	0.087853	0.471404	0.248329	71.3238
1	791.333	28.7549	5.73061	0.0772455	0.436674	0.263188	66.9278
1	1038.33	26.7331	5.1673	0.101356	0.519408	0.264501	86.0878
1	800.333	19.3099	5.55054	0.0781241	0.432255	0.243002	69.4925
1	1041.67	15.2568	4.71422	0.101682	0.47792	0.274375	64.365
1	714.667	28.9199	6.27897	0.0697618	0.437966	0.243343	72.0532
1	706	16.3431	5.7717	0.0689158	0.394632	0.247263	80.9897
1	988	25.1458	4.89522	0.096443	0.470624	0.264303	75.0142
1	863	12.4691	4.96383	0.0842412	0.417103	0.269385	79.1666
1	953	20.2248	4.98795	0.0930265	0.457409	0.26661	71.9347
1	782.333	22.7632	5.56246	0.076367	0.424171	0.247249	78.053
1	836	16.2011	5.47554	0.0816056	0.446273	0.248458	61.7219
1	724	19.5164	5.82108	0.0706728	0.409225	0.237729	75.6129
1	801.667	12.2521	5.74608	0.0782542	0.449499	0.268659	70.3993
1	934	13.3134	4.85891	0.0911719	0.437473	0.253587	78.1752
1	926.667	14.7445	4.88837	0.090456	0.441542	0.275637	78.8122
1	967	15.2241	4.67638	0.0943931	0.440786	0.275909	73.5653
1	908.667	20.4889	5.26097	0.0886989	0.464356	0.292578	78.0662
1	1038.67	15.8451	4.8479	0.101389	0.489901	0.282962	87.0537
1	919	21.249	4.70265	0.0897076	0.421626	0.277086	71.8148
1	790.667	22.1456	5.82491	0.0771805	0.44857	0.257025	77.5782
1	663.333	9.54714	6.16135	0.0647509	0.39857	0.223188	79.4884
1	952	9.15437	4.60912	0.0929289	0.426359	0.267571	64.9648
1	852	10.9881	5.2423	0.0831675	0.428476	0.256274	72.4658
1	939.667	16.7399	4.97928	0.091725	0.452861	0.26556	80.137
1	995.333	8.70259	4.77196	0.0971589	0.462419	0.264083	75.3728
1	984	11.7326	4.81906	0.0960526	0.462527	0.257671	81.8971
1	522	10.5252	6.50352	0.0509547	0.328199	0.206353	59.1016
1	801.667	8.70601	4.89304	0.0782542	0.379796	0.262245	74.1075
1	784	11.8311	5.19707	0.0765297	0.397482	0.252936	81.043
1	906.333	11.0184	4.98795	0.0884712	0.440024	0.254433	77.3963
1	678	21.9614	5.71811	0.0661826	0.376531	0.233449	71.6109
1	988	42.0147	4.96528	0.096443	0.478959	0.259897	78.0198
1	964	21.4595	5.25791	0.0941003	0.494251	0.271675	75.9489
1	832.667	17.7993	5.36903	0.0812803	0.431745	0.235888	76.5479
1	919.333	38.1705	4.92048	0.0897402	0.440554	0.255556	72.1515
1	627	27.6894	6.08909	0.0612042	0.363602	0.22647	60.0882
1	1074.33	15.7219	4.66066	0.10487	0.486035	0.274756	74.5119
1	713.333	46.018	5.81916	0.0696316	0.406132	0.224463	66.5288
1	913	24.6942	4.93252	0.0891219	0.437395	0.266579	75.9887
1	950.667	14.8861	4.95725	0.0927988	0.455375	0.255415	76.4549
1	887	22.6399	5.33002	0.086584	0.460972	0.252354	79.1036
1	809.667	19.4068	5.54224	0.0790351	0.437493	0.259957	76.0474
1	733.667	13.4749	5.58424	0.0716164	0.398297	0.241845	70.0901
1	969	17.0395	4.67931	0.0945884	0.441813	0.285787	77.3499
1	749.333	11.3675	5.74685	0.0731457	0.411844	0.247557	61.8558
1	712.333	31.6256	5.21233	0.069534	0.360887	0.231383	47.7492
1	999	16.8791	4.66552	0.0975168	0.453297	0.258528	83.4901
1	980.333	17.68	4.59534	0.0956947	0.439794	0.267949	73.1279
1	910.667	8.87888	5.03117	0.0888942	0.445875	0.267152	68.5091
1	891.333	14.9112	4.96176	0.087007	0.431303	0.254165	72.0861
1	562.667	17.3601	6.72416	0.0549244	0.36875	0.20512	83.3768
1	924	38.4355	5.02173	0.0901957	0.45154	0.284673	56.9076
1	867.333	66.8261	5.09584	0.0846642	0.427857	0.265222	74.3452
1	924.333	17.0677	4.96535	0.0902282	0.443924	0.248557	61.4976
1	921.667	16.8021	4.94264	0.0899679	0.442794	0.259085	74.7374
1	753.333	9.99223	5.54257	0.0735362	0.400581	0.221967	65.9584
1	847	8.79496	5.33814	0.0826794	0.440804	0.276731	80.0923
1	787	17.9119	5.28406	0.0768225	0.402472	0.245565	70.359
1	924	9.04861	4.65575	0.0901957	0.41754	0.266069	77.7299
1	663	21.3388	5.80415	0.0647183	0.374292	0.209795	77.1147
1	752	8.76291	5.3267	0.073406	0.390354	0.234374	64.1558
1	909.667	14.5897	4.80749	0.0887966	0.424035	0.256351	71.2614
1	978.333	19.1854	4.5558	0.0954994	0.434494	0.271204	60.5934
1	1127.33	19.6206	4.58359	0.110044	0.502227	0.268351	76.4879
1	815.333	8.67862	5.3333	0.0795883	0.416908	0.247126	78.5327
1	944	11.3698	5.34623	0.092148	0.491122	0.27196	83.4244
1	961	19.2561	4.78948	0.0938074	0.44439	0.266252	80.7311
1	954.333	11.478	5.29771	0.0931567	0.492952	0.259226	80.0365
1	837.667	30.8269	5.33282	0.0817683	0.433684	0.231965	85.2694
1	942	25.2511	5.37051	0.0919528	0.493064	0.270749	78.5741
1	838	17.6473	5.2545	0.0818009	0.42857	0.239883	65.1047
1	738.333	12.1329	5.42453	0.072072	0.388379	0.246305	72.2325
1	679	28.5484	5.62557	0.0662802	0.368435	0.230271	66.7146
1	736	20.4893	5.95562	0.0718442	0.427814	0.244292	72.4015
1	1014.67	35.7181	4.83773	0.0990461	0.479494	0.269184	79.5354
1	770.667	17.416	5.57276	0.0752282	0.418066	0.238087	69.4822
1	896.333	32.2444	5.31906	0.087495	0.460093	0.2441	73.8227
1	712.333	29.0582	6.23465	0.069534	0.422353	0.239458	78.4479
1	838	11.0263	4.9082	0.0818009	0.401155	0.259795	79.14
1	944.667	17.4201	5.00019	0.0922131	0.456867	0.244219	74.2627
1	902	21.7274	4.83677	0.0880482	0.424068	0.275303	76.0554
1	866.333	15.037	5.54134	0.0845666	0.462372	0.259522	62.1248
1	740	17.9842	5.35458	0.0722347	0.38579	0.24628	73.5665
1	709.333	15.2707	6.22077	0.0692411	0.415192	0.245518	69.6795
1	754.667	33.8461	5.59485	0.0736663	0.403496	0.243235	72.3949
1	950	20.7271	4.87299	0.0927337	0.450624	0.269211	65.0073
1	854.667	33.7517	5.84356	0.0834278	0.475881	0.228424	74.9906
1	933.333	14.4718	5.17907	0.0911068	0.471137	0.266389	72.3406
1	888.333	11.6036	5.01528	0.0867141	0.43464	0.264471	84.6075
1	817.667	15.4407	5.14641	0.079816	0.409012	0.279225	78.1387
1	823.667	21.4012	5.62253	0.0804017	0.45045	0.253741	67.5465
1	934.333	28.6915	5.09944	0.0912044	0.46362	0.264929	65.1744
1	627.667	10.2325	5.8137	0.0612693	0.354696	0.221973	69.5614
1	837	18.517	5.34373	0.0817033	0.435843	0.259664	79.6576
1	890.333	30.3099	5.01085	0.0869094	0.432564	0.254758	69.6606
1	654.333	16.3492	6.42399	0.0638724	0.408253	0.231107	71.9991
1	906	19.9974	4.87521	0.0884386	0.429271	0.248925	64.3391
1	950.333	18.5043	4.94222	0.0927662	0.446962	0.260468	81.4552
1	806	21.3491	5.80786	0.0786772	0.455287	0.241421	86.7754
1	744	19.4894	5.63019	0.0726251	0.408274	0.23801	68.8439
1	918.333	11.8281	5.04913	0.0896426	0.449268	0.255865	79.7393
1	928.333	14.5651	5.02133	0.0906187	0.454013	0.263056	78.8395
1	887	14.6251	5.06397	0.086584	0.428658	0.257378	75.2981
1	725.333	27.735	5.4576	0.070803	0.385622	0.239931	71.8254
1	889.333	9.94028	5.02312	0.0868117	0.432796	0.257212	67.7503
1	723.333	10.7638	5.65858	0.0706077	0.399233	0.217412	75.4501
1	997.667	12.4105	4.57165	0.0973866	0.443741	0.265522	77.0043
1	917	21.2923	4.82319	0.0895124	0.431363	0.267303	75.0379
1	787.667	16.5221	5.45909	0.0768876	0.418314	0.233972	73.7959
1	824	11.3064	5.2853	0.0804343	0.420581	0.265181	77.5213
1	802.333	57.2785	6.30386	0.0783193	0.485773	0.262751	65.2877
1	860.667	25.862	5.12208	0.0840135	0.425904	0.257157	76.6202
1	756.333	37.563	6.1588	0.073829	0.45195	0.261778	61.4319
1	846.667	14.1302	5.7082	0.0826469	0.468676	0.241483	75.386
1	940	33.0217	5.02061	0.0917575	0.458824	0.267175	67.8981
1	825	14.5362	5.9357	0.0805319	0.462627	0.262098	67.6301
1	866	15.1015	4.98247	0.0845341	0.417792	0.26775	74.3349
1	902.667	37.1881	4.94946	0.0881133	0.43481	0.283403	64.1747
1	889.333	14.606	5.08536	0.0868117	0.439762	0.257698	81.2018
1	706.667	43.2064	5.98574	0.0689808	0.4126	0.243142	74.1592
1	859.667	13.385	5.29136	0.0839158	0.443625	0.251324	79.1368
1	711	11.2746	6.3774	0.0694038	0.43865	0.255647	79.0941
1	895	18.6804	5.03208	0.0873649	0.439514	0.264891	71.6214
1	836	31.2635	5.02976	0.0816056	0.408525	0.263725	72.9207
1	727.667	14.4815	5.47066	0.0710307	0.388429	0.227942	65.0091
1	719.333	13.3691	6.17199	0.0702173	0.425312	0.246305	81.7636
1	785.667	21.1426	5.56194	0.0766924	0.42357	0.249332	79.0076
1	890.333	26.1354	5.07308	0.0869094	0.43838	0.270311	59.3469
1	882.667	27.0107	5.32079	0.086161	0.448941	0.257337	78.1635
1	710.667	12.7211	6.33504	0.0693713	0.436254	0.24666	74.9989
1	981.333	11.9568	4.7786	0.0957923	0.452173	0.260408	63.6564
1	983	9.67302	4.79726	0.095955	0.453139	0.268584	82.3169
1	946	20.5698	5.03915	0.0923432	0.464695	0.265656	72.1751
1	819	28.5404	5.37824	0.0799462	0.429166	0.266195	72.3471
1	953	10.4341	4.78587	0.0930265	0.441774	0.260308	76.075
1	873	17.1171	5.82652	0.0852174	0.491513	0.226237	81.0156
1	905	26.9047	5.40355	0.088341	0.475957	0.258233	75.5992
1	859.667	23.4375	5.31709	0.0839158	0.44311	0.251384	54.7267
1	740.667	17.6741	5.76805	0.0722997	0.411758	0.236122	60.5736
1	747.667	41.2063	5.77393	0.072983	0.41094	0.227627	55.7046
1	1018.67	13.6874	5.08326	0.0994365	0.503223	0.261001	75.9041
1	886	9.96133	5.15641	0.0864864	0.435602	0.267725	67.5918
1	871.333	36.9944	5.47783	0.0850547	0.459813	0.245935	83.0223
1	724.667	17.0321	5.15965	0.0707379	0.363629	0.241571	58.8374
1	725.667	23.9759	5.84436	0.0708355	0.408758	0.21522	72.7969
1	707.667	23.2582	5.69134	0.0690785	0.392242	0.218812	71.8773
1	869	19.8179	5.54408	0.0848269	0.457588	0.251644	75.5985
1	871.667	34.1302	5.44671	0.0850872	0.458786	0.261582	73.9265
1	963.667	28.8133	4.88711	0.0940677	0.456864	0.276938	83.3641
1	1027	19.8306	4.74641	0.10025	0.47453	0.27045	82.9272
1	801.333	27.7806	5.7283	0.0782217	0.445216	0.248657	79.5919
1	927	17.1573	5.297	0.0904885	0.472964	0.279675	62.3594
1	777.667	15.5028	5.51603	0.0759115	0.416199	0.242935	64.3771
1	832	12.9515	5.42815	0.0812152	0.43021	0.267162	67.3471
1	794.667	19.7061	5.62254	0.0775709	0.43384	0.2331	82.1962
1	979.667	42.8186	5.0565	0.0956296	0.48204	0.266196	70.4274
1	1002.33	17.3857	4.83586	0.0978422	0.471611	0.251991	79.9105
1	868.667	16.8279	5.85926	0.0847944	0.487546	0.255661	83.591
1	899.333	21.884	4.95879	0.0877879	0.435381	0.253619	64.0068
1	750.667	13.2057	5.69136	0.0732759	0.416325	0.228148	77.887
1	828	32.2637	5.15132	0.0808247	0.411727	0.254741	59.3018
1	897.333	10.4736	5.0766	0.0875927	0.439891	0.263576	81.5028
1	835	16.8727	5.14889	0.081508	0.419647	0.248867	71.4792
1	633.667	22.5774	6.35809	0.061855	0.392924	0.216047	72.4739
1	941	17.0692	4.97572	0.0918551	0.453195	0.262296	66.1669
1	759	23.891	5.5624	0.0740893	0.411646	0.230846	78.0851
1	849.333	10.4468	5.00211	0.0829072	0.412076	0.255759	75.4896
1	845.333	13.2744	5.59688	0.0825167	0.461456	0.252563	66.1749
1	807	23.0005	5.89332	0.0787748	0.458272	0.258483	77.7938
1	834	30.303	5.38738	0.0814104	0.437756	0.228985	74.7385
1	903.333	13.3446	5.19929	0.0881783	0.457914	0.248381	81.0761
1	744.333	13.7514	5.62501	0.0726577	0.40841	0.23551	84.6077
1	717.333	13.4679	6.01143	0.0700221	0.416833	0.23572	67.8898
1	682	13.1988	5.95027	0.066573	0.393155	0.202215	86.4915
1	836.333	34.1286	5.08417	0.0816382	0.406883	0.260513	65.5404
1	818	14.0488	5.25595	0.0798486	0.4184	0.239816	78.3169
1	994.667	23.3304	4.73629	0.0970938	0.459721	0.271608	70.4373
1	1097	18.561	5.05306	0.107083	0.535869	0.278884	66.4589
1	946.333	28.8661	4.90284	0.0923758	0.451866	0.265764	54.5482
1	856.333	53.5029	4.96246	0.0835905	0.413786	0.258653	58.3066
1	724.667	12.2497	5.64129	0.0707379	0.389356	0.241662	62.2579
1	830.667	10.4712	5.15215	0.081085	0.416409	0.246756	74.2086
1	807.333	20.9525	5.21832	0.0788074	0.409435	0.264417	74.1941
1	939.333	41.2154	5.09844	0.0916925	0.464905	0.266076	78.2471
1	737.333	23.2413	5.68557	0.0719744	0.407704	0.219546	85.8401
1	759	18.7768	5.56318	0.0740893	0.411391	0.238798	71.4326
1	865.667	23.4229	5.12121	0.0845015	0.430423	0.262511	66.0629
1	962.667	21.6608	4.47544	0.0939701	0.420421	0.271129	66.927
1	682.667	9.15727	5.87185	0.0666381	0.384544	0.264607	78.2688
1	612	36.2599	6.19676	0.05974	0.368627	0.2181	55.9053
1	694	11.1481	5.68726	0.0677444	0.377842	0.234467	65.8168
1	799.333	30.4443	5.31729	0.0780264	0.41519	0.264574	73.5566
1	782.667	16.865	5.18406	0.0763995	0.394381	0.23804	67.3527
1	896	10.4101	4.90936	0.0874625	0.425719	0.267918	72.5137
1	930.667	8.29848	5.03675	0.0908465	0.455507	0.263863	81.0359
1	754	17.9834	5.64857	0.0736013	0.408288	0.244803	83.5656
1	875.333	20.2977	5.43246	0.0854451	0.459541	0.262299	75.2119
1	737.333	12.2648	5.68096	0.0719744	0.400202	0.224312	68.2105
1	736.333	23.832	5.5698	0.0718767	0.399847	0.22026	74.1898
1	654.333	19.1244	5.75951	0.0638724	0.363022	0.226389	66.9409
1	811	13.7409	5.29796	0.0791653	0.412695	0.244479	59.9717
1	801.333	8.07152	5.47584	0.0782217	0.423318	0.271022	74.2501
1	918	14.0839	4.90818	0.08961	0.439464	0.271267	74.7886
1	847.667	20.1341	5.30069	0.0827445	0.433678	0.253589	73.4155
1	935.667	56.2258	4.78378	0.0913345	0.43347	0.27045	67.6427
1	882	16.8765	4.94924	0.0860959	0.425468	0.268739	75.8853
1	754.333	9.07985	6.18154	0.0736338	0.443871	0.257867	72.7404
1	812.667	8.27955	5.3713	0.079328	0.424865	0.25711	71.0948
1	742	26.5143	5.96046	0.0724299	0.428182	0.245381	78.8999
1	768.333	15.8385	5.33938	0.0750004	0.400073	0.246135	69.2376
1	809	9.29908	5.66447	0.07897	0.444908	0.261331	70.1829
1	823.667	13.2135	5.44245	0.0804017	0.436805	0.236211	73.0706
1	898.667	25.7806	4.82515	0.0877228	0.422953	0.270562	58.6344
1	663	35.6019	6.05103	0.0647183	0.385469	0.237854	74.7744
1	740	21.0063	5.95104	0.0722347	0.419256	0.249788	80.0552
1	856.333	18.558	5.139	0.0835905	0.423143	0.251486	79.207
1	857.333	19.5015	5.21026	0.0836881	0.432781	0.256845	58.694
1	854	7.6406	4.82597	0.0833627	0.395876	0.272547	53.7334
1	774.333	13.5885	5.07151	0.0755861	0.382955	0.247646	70.6547
1	844.333	25.0208	5.18783	0.0824191	0.420079	0.247448	60.1071
1	830.333	12.5138	5.27708	0.0810525	0.427387	0.251047	77.8034
1	853	16.4459	5.18546	0.0832651	0.425398	0.247117	68.2043
1	904.667	9.04117	5.10464	0.0883085	0.443782	0.265579	82.58
1	632	7.75761	6.38317	0.0616923	0.368632	0.232739	65.07
1	601.667	13.9515	5.74988	0.0587313	0.333281	0.213825	41.5568
1	809	13.4412	5.63855	0.07897	0.444969	0.252304	68.1081
1	772.667	15.3531	5.38301	0.0754234	0.399038	0.271318	70.3815
1	779.333	13.8476	5.72004	0.0760742	0.433139	0.249548	71.7753
1	648	10.006	6.22264	0.0632541	0.379133	0.231548	84.6176
1	854.667	13.5854	5.48016	0.0834278	0.452276	0.246898	86.5917
1	823.667	15.5094	5.41382	0.0804017	0.432349	0.240445	74.6679
1	940.333	15.3543	4.91388	0.0917901	0.448895	0.262112	84.5064
1	823	11.077	5.37076	0.0803367	0.429696	0.226606	83.3316
1	976.667	12.3945	4.79141	0.0953367	0.448299	0.270453	73.7042
1	697.667	9.12583	5.69013	0.0681023	0.379588	0.235807	81.3886
1	945.333	9.3589	4.84131	0.0922781	0.439236	0.268419	74.9152
1	797.667	10.1141	5.09038	0.0778638	0.39087	0.259337	67.7377
1	811	15.8646	5.64694	0.0791653	0.446385	0.251153	70.5898
1	728.333	12.6296	5.49777	0.0710958	0.390795	0.233827	62.4211
1	921.333	10.6576	4.7302	0.0899354	0.421807	0.254594	72.1623
1	690.333	19.7777	5.6325	0.0673865	0.378374	0.24207	71.9484
1	815	15.6978	5.0677	0.0795557	0.402485	0.278861	78.101
1	597.667	18.085	5.70098	0.0583409	0.332524	0.201348	76.0119
1	838.333	20.3111	5.29349	0.0818334	0.431044	0.250794	74.9209
1	802.333	18.4379	5.48111	0.0783193	0.417103	0.254238	83.358
1	872.667	33.8646	5.31694	0.0851848	0.451299	0.259218	64.9771
1	749	17.4799	5.60154	0.0731132	0.406722	0.247761	58.6866
1	977.667	44.5619	5.00591	0.0954343	0.477178	0.25768	77.8456
1	774	29.3219	5.65452	0.0755535	0.426201	0.264662	72.8887
1	909.333	13.0595	5.0497	0.088764	0.447206	0.248253	80.6068
1	970.333	23.9391	4.8663	0.0947185	0.457333	0.273149	62.8219
1	832.667	10.8582	5.12142	0.0812803	0.411522	0.255304	74.8764
1	890.667	21.577	5.46933	0.0869419	0.46705	0.251409	88.0799
1	847	13.5473	5.22058	0.0826794	0.43079	0.257548	80.2713
1	909	17.2478	4.78863	0.0887315	0.424789	0.27274	74.077
1	864.333	15.7425	5.18158	0.0843714	0.437196	0.242553	71.2744
1	938	13.5074	4.7971	0.0915623	0.4365	0.261438	78.782
1	751	12.5351	5.37438	0.0733084	0.393404	0.232513	70.3425
1	805	14.1959	5.26139	0.0785796	0.412757	0.264904	76.9576
1	1072	20.874	4.89197	0.104643	0.509591	0.293558	71.0796
1	908	24.7107	4.97432	0.0886339	0.436103	0.276924	71.392
1	849.333	13.825	5.0827	0.0829072	0.41838	0.246846	78.7177
1	687.333	8.2185	5.7292	0.0670936	0.383393	0.245158	78.4401
1	961.333	8.99131	4.80803	0.09384	0.446909	0.267303	72.9438
1	756	8.70275	5.26344	0.0737965	0.388338	0.224821	76.95
1	757.333	14.0581	5.56333	0.0739266	0.402185	0.250359	54.2786
1	825.667	10.8202	5.16939	0.080597	0.410545	0.262293	73.3621
1	768.667	10.4801	5.36777	0.0750329	0.402485	0.227935	52.0722
1	1034.67	13.9477	4.80226	0.100998	0.484148	0.268564	82.3682
1	904.333	14.204	5.01054	0.088276	0.432874	0.262574	60.0116
1	905.667	8.74639	5.08163	0.0884061	0.447472	0.25383	77.0686
1	1008.33	11.1621	4.40015	0.0984279	0.431636	0.278638	66.8238
1	890.667	23.4537	4.92398	0.0869419	0.427532	0.266298	82.1964
1	698.333	58.3271	5.85867	0.0681674	0.396588	0.254097	69.8875
1	703	29.8395	6.67738	0.0686229	0.446256	0.248984	60.4517
1	738.667	17.522	5.69089	0.0721045	0.40763	0.25719	60.0765
1	797.667	10.4037	5.43366	0.0778638	0.415672	0.252619	78.2835
1	1072.33	31.457	4.81651	0.104675	0.503195	0.278591	68.746
1	1082	26.6371	4.47776	0.105619	0.471609	0.277212	66.2582
1	627	15.9211	5.81722	0.0612042	0.355636	0.212713	74.9186
1	857	14.5841	5.32063	0.0836555	0.442885	0.248496	80.9327
1	911.667	14.6609	4.94602	0.0889918	0.436636	0.26623	82.3335
1	739.333	6.20661	5.36428	0.0721696	0.38664	0.229578	75.5616
1	822	9.796	5.2684	0.080239	0.416231	0.241331	72.5945
1	893.333	10.8995	5.13369	0.0872022	0.446985	0.244236	80.9432
1	935	15.404	4.81745	0.0912695	0.439903	0.283666	82.7469
1	916	14.5181	4.92235	0.0894148	0.433936	0.269956	76.2918
1	814.667	20.5989	5.47354	0.0795232	0.423793	0.242515	64.4849
1	690.333	16.0333	6.06168	0.0673865	0.399086	0.24517	77.4341
1	685.667	24.3353	5.90289	0.0669309	0.394868	0.215647	72.0356
1	709.667	39.67	5.51238	0.0692737	0.372885	0.253222	72.1892
1	828	8.76654	5.28847	0.0808247	0.425713	0.23916	78.5099
1	683.667	7.13447	5.38269	0.0667357	0.357387	0.230514	81.2436
1	879	19.0444	5.4986	0.0858031	0.467524	0.237755	76.9872
1	974	39.3782	4.83495	0.0950764	0.457715	0.283227	67.3174
1	996.667	20.4046	4.93279	0.097289	0.478689	0.273347	78.2304
1	777	13.6908	5.26771	0.0758464	0.397027	0.24812	82.5474
1	907.667	12.3039	5.01448	0.0886013	0.44254	0.25913	81.5668
1	759.333	29.0776	5.2774	0.0741219	0.387899	0.249947	76.8829
1	720.333	29.7316	6.09508	0.0703149	0.425146	0.205688	57.4955
1	742.333	32.1381	5.97408	0.0724624	0.428311	0.244015	52.8172
1	822	10.6467	5.2111	0.080239	0.415295	0.252817	78.2508
1	752.667	12.8866	5.26012	0.0734711	0.383417	0.226471	70.7066
1	874	14.7289	5.32596	0.085315	0.441761	0.270446	72.6638
1	1047.33	19.2923	4.89364	0.102235	0.498684	0.258249	83.6295
1	762	13.3271	5.84445	0.0743822	0.431626	0.251873	75.8685
1	797	11.6103	5.08971	0.0777987	0.3935	0.288937	75.5292
1	967.333	15.1732	5.00035	0.0944257	0.464817	0.274842	76.0794
1	957.333	8.2117	4.90766	0.0934495	0.454107	0.25913	84.5949
1	723.667	18.4379	5.47678	0.0706403	0.381503	0.260217	73.0656
1	825.333	7.6254	5.5331	0.0805644	0.441586	0.258282	67.2563
1	772.667	10.5845	5.01829	0.0754234	0.37727	0.245318	51.6321
1	931.333	41.7095	5.05403	0.0909115	0.45717	0.247384	57.8195
1	871.667	28.9919	4.95428	0.0850872	0.417372	0.244007	47.9783
1	826.667	17.9734	4.93464	0.0806946	0.397247	0.247338	74.2186
1	951.667	18.9402	4.99992	0.0928964	0.461474	0.267431	76.8939
1	810.333	23.3598	5.35151	0.0791002	0.417798	0.25378	74.2276
1	858.667	13.8455	5.3781	0.0838182	0.449516	0.249081	66.8068
1	893.333	21.5527	5.04756	0.0872022	0.436879	0.271418	76.8033
1	754.333	23.3103	5.48845	0.0736338	0.403423	0.243052	66.5859
1	866.333	11.9762	4.8701	0.0845666	0.410827	0.261054	72.5468
1	704	47.4296	6.24225	0.0687205	0.421708	0.233971	67.3207
1	875.667	9.51083	4.95098	0.0854777	0.423132	0.265067	74.3043
1	867.667	15.4478	5.3327	0.0846968	0.447712	0.271443	66.19
1	945	10.0857	4.95124	0.0922456	0.453221	0.263669	83.2487
1	860.333	15.5385	5.12561	0.0839809	0.430508	0.252968	76.1548
1	788.667	25.9109	5.49719	0.0769852	0.419418	0.243272	72.2812
1	908.667	25.9434	4.93651	0.088699	0.436579	0.253602	68.1518
1	791.667	17.223	5.16405	0.0772781	0.39926	0.282405	71.1927
1	972.667	12.8703	4.77844	0.0949463	0.449898	0.272	68.6862
1	1001.67	34.7033	4.72542	0.0977771	0.460029	0.263009	74.1515
1	899.333	21.3694	5.11004	0.0877879	0.447421	0.2618	74.6677
1	871.333	24.7852	5.31336	0.0850547	0.442161	0.257448	81.9825
1	894.333	19.2572	5.03332	0.0872998	0.433978	0.272522	62.5928
1	840.333	18.1933	5.47175	0.0820286	0.4403	0.260985	65.8807
1	870.667	12.1269	4.99177	0.0849896	0.422377	0.257862	68.4844
1	797.667	16.5878	5.71169	0.0778638	0.439679	0.260195	67.677
1	719	26.5147	5.71012	0.0701848	0.391499	0.241132	75.9456
1	914.333	18.2814	4.94118	0.0892521	0.43452	0.275125	68.0801
1	879	11.2435	5.00544	0.0858031	0.42826	0.256258	62.8198
1	775	9.23621	5.29548	0.0756512	0.397935	0.255757	81.0704
1	829.333	17.4666	5.35659	0.0809549	0.427154	0.256346	71.0044
1	894.667	24.2604	4.85014	0.0873324	0.419041	0.248774	78.426
1	850.667	15.2388	5.27831	0.0830373	0.437158	0.258126	77.0651
1	853	38.182	5.56847	0.0832651	0.458547	0.265158	55.0752
1	866	20.8668	5.46583	0.0845341	0.459948	0.277387	67.8652
1	830.667	16.1344	5.20325	0.081085	0.420422	0.257643	63.2973
1	1011.33	9.31066	4.9246	0.0987207	0.484389	0.259671	79.7038
1	642	13.4197	5.95834	0.0626684	0.369094	0.212593	70.115
1	837	6.97826	5.14786	0.0817033	0.414322	0.263292	77.6102
1	873	22.9384	5.15798	0.0852174	0.438379	0.278916	74.4327
1	848.333	20.112	5.35945	0.0828096	0.441208	0.250362	78.7265
1	948.667	9.01658	4.70518	0.0926035	0.436029	0.258427	64.481
1	734.333	15.9222	5.13083	0.0716815	0.367314	0.249901	74.4678
1	877	19.7927	5.02726	0.0856078	0.424194	0.248962	68.5395
1	782.333	24.3801	5.26269	0.076367	0.401377	0.248667	61.7019
1	667.333	30.8366	6.16527	0.0651413	0.4005	0.23908	76.3076
1	910.333	22.336	5.50543	0.0888616	0.48756	0.259599	82.6611
1	831.333	22.1774	5.16797	0.0811501	0.418589	0.24111	70.2025
1	951.667	20.4866	5.49998	0.0928964	0.503145	0.258015	84.1074
1	771.667	15.0656	5.70514	0.0753258	0.419888	0.235823	66.5733
1	904.333	12.5723	5.07232	0.088276	0.445648	0.278596	70.7573
1	487	21.8373	7.09608	0.0475382	0.337702	0.209422	62.4996
1	902.667	12.2363	5.2391	0.0881133	0.454576	0.272966	79.9848
1	746.667	15.2442	5.66991	0.0728854	0.413431	0.258422	38.9606
1	868.333	9.35331	4.73109	0.0847618	0.400747	0.266947	82.2331
1	719.333	20.3428	5.57436	0.0702173	0.391199	0.241847	55.0377
1	967	10.926	4.88346	0.0943931	0.460367	0.270777	81.0503
1	844.333	47.7849	5.82581	0.0824191	0.469475	0.265042	67.4532
1	1020.33	19.2497	4.54245	0.0995992	0.452302	0.285073	80.0556
1	972	16.805	5.0234	0.0948812	0.473959	0.272142	80.2224
1	814	12.4312	5.57584	0.0794581	0.433656	0.260523	74.3848
1	799	8.34751	5.04823	0.0779939	0.391464	0.24121	67.5952
1	850	18.1078	5.66096	0.0829722	0.460477	0.267926	74.9202
1	882.667	11.9566	4.9642	0.086161	0.423888	0.263976	63.057
1	923	31.5165	5.01283	0.0900981	0.44918	0.241857	61.5998
1	912.333	20.3131	4.98238	0.0890569	0.443202	0.260472	66.3016
1	863	8.42157	5.26039	0.0842412	0.442661	0.234737	85.7468
1	829.667	17.0789	5.55713	0.0809874	0.441291	0.235298	74.41
1	800	13.3208	5.24288	0.0780915	0.404899	0.247116	65.3047
1	939.333	9.46524	4.68064	0.0916925	0.42656	0.266607	70.5611
1	898.333	15.8262	4.90879	0.0876903	0.425743	0.26272	80.814
1	958.333	13.3501	4.75361	0.0935471	0.444572	0.256688	78.4387
1	673.667	13.5707	5.50589	0.0657596	0.36102	0.242468	76.8125
1	779.333	7.67124	5.18054	0.0760742	0.38767	0.253681	74.9662
1	1040.67	10.867	4.65485	0.101584	0.468786	0.278995	84.4025
1	776	13.2335	5.39583	0.0757488	0.402737	0.256019	72.1152
1	947.333	15.9588	4.90648	0.0924734	0.450891	0.256622	77.3085
1	664.667	15.3849	5.78024	0.064881	0.365734	0.226665	77.0266
1	822.333	9.54936	5.24032	0.0802716	0.419091	0.259161	77.1718
1	864	21.9572	5.58344	0.0843388	0.467759	0.2604	70.0788
1	707.333	34.6638	6.01956	0.0690459	0.408274	0.258249	72.1654
1	868	18.0452	4.8682	0.0847293	0.411867	0.261031	62.5708
1	845.333	17.9441	5.24349	0.0825167	0.431735	0.249044	70.661
1	973	33.5179	4.87721	0.0949788	0.461948	0.264193	66.7113
1	1002	28.4401	4.87909	0.0978096	0.474432	0.259133	78.7672
1	1001.33	34.5233	4.91117	0.0977446	0.47542	0.265343	78.908
1	1093	13.1704	4.48227	0.106693	0.474657	0.270901	69.379
1	856.667	24.3568	5.19221	0.083623	0.432531	0.260173	76.0029
1	960	16.697	5.03525	0.0937098	0.46113	0.262738	75.2846
1	937.333	17.847	4.8404	0.0914972	0.442608	0.279537	73.2608
1	813	20.3545	5.34717	0.0793605	0.421036	0.256219	69.4427
1	768.333	11.8293	5.42734	0.0750004	0.40455	0.215998	74.8402
1	859.333	37.4494	4.86217	0.0838833	0.404778	0.27549	62.927
1	935	20.1704	4.75056	0.0912695	0.432346	0.262012	76.6818
1	700.667	8.65082	5.42745	0.0683952	0.369346	0.233964	56.0313
1	1012.67	20.5751	4.76011	0.0988508	0.46819	0.260581	82.2355
1	779.333	11.6738	5.29021	0.0760742	0.401077	0.231376	58.635
1	1020	50.2116	5.0793	0.0995667	0.503487	0.264408	87.5804
1	773	8.68636	5.92242	0.0754559	0.435193	0.258281	83.9684
1	935	24.3347	4.93848	0.0912695	0.450034	0.254906	54.9673
1	874.333	11.8055	4.7808	0.0853475	0.40637	0.267004	78.3616
1	829.667	22.2339	5.30568	0.0809874	0.428513	0.237696	75.4694
1	712.667	9.07086	5.72045	0.0695665	0.395283	0.230846	75.4718
1	654.667	9.35533	6.10307	0.0639049	0.386862	0.213254	82.9385
1	607.333	33.7564	6.39289	0.0592845	0.366967	0.224295	75.4936
1	666	9.59093	6.1225	0.0650112	0.393347	0.229553	65.176
1	939.667	35.759	5.14683	0.091725	0.459624	0.248897	71.9059
1	946	12.4163	4.97565	0.0923432	0.453203	0.263929	83.5987
1	976	21.2188	5.12554	0.0952717	0.488625	0.263467	74.791
1	957.667	20.1651	4.82777	0.0934821	0.451317	0.25386	70.163
1	789.333	8.78484	5.09188	0.0770503	0.390503	0.248389	75.853
1	947	46.4908	4.90343	0.0924408	0.450892	0.2545	84.4789
1	707	23.447	5.84878	0.0690134	0.401397	0.223135	62.5432
1	618.333	39.4203	6.13369	0.0603582	0.36638	0.22082	53.8978
1	918.667	35.6633	5.07075	0.0896751	0.449769	0.269248	73.7029
1	740.333	13.3674	5.56204	0.0722672	0.394065	0.229907	73.6883
1	975.667	42.5826	4.89722	0.0952391	0.46275	0.261175	63.6634
1	637.667	23.7678	5.94632	0.0622455	0.369432	0.202204	70.7383
1	926	17.1769	5.09368	0.0903909	0.453497	0.270944	73.4127
1	918.333	21.851	5.09524	0.0896426	0.446872	0.266141	54.8853
1	917	17.2941	4.81463	0.0895124	0.426253	0.270053	79.4092
1	933	18.3611	4.88268	0.0910742	0.442859	0.283386	62.0736
1	842.667	45.101	5.47842	0.0822564	0.45	0.264052	74.3502
1	986.667	9.48042	4.91416	0.0963129	0.473268	0.267418	72.8667
1	914	20.6905	4.83886	0.0892196	0.428174	0.256999	77.8346
1	891.333	26.9562	5.16724	0.087007	0.440439	0.259166	71.7315
1	991	17.4225	5.06078	0.0967359	0.474492	0.283227	86.3545
1	970	19.1747	4.9596	0.094686	0.468746	0.259618	79.1742
1	973.333	15.9501	5.01029	0.0950113	0.47475	0.261933	72.4968
1	786.333	9.78067	5.20582	0.0767575	0.396144	0.239148	80.8264
1	932	49.8328	4.96658	0.0909766	0.445856	0.263817	71.5965
1	968.667	16.5785	4.86623	0.0945558	0.454497	0.270827	72.3353
1	788.333	8.18296	5.59833	0.0769527	0.415295	0.26834	77.2947
1	806	17.1746	5.30493	0.0786772	0.411208	0.270065	64.4189
1	854.333	28.4151	5.13665	0.0833952	0.424722	0.250754	60.599
1	746.333	9.47953	5.01914	0.0728529	0.364567	0.242845	61.2107
1	801.667	11.1325	5.36963	0.0782542	0.417741	0.242744	72.197
1	923.333	29.6366	4.9858	0.0901306	0.448341	0.277521	78.0005
1	856	10.066	5.07368	0.0835579	0.42075	0.24501	74.0895
1	1060	39.7219	5.05725	0.103471	0.51062	0.270487	80.8015
1	790.667	28.1648	5.28411	0.0771805	0.40765	0.241572	76.4352
1	753.667	14.7369	5.50281	0.0735687	0.404557	0.245083	79.7424
1	881	26.8006	4.93596	0.0859983	0.419813	0.270747	81.0269
1	947.667	22.9026	5.04188	0.0925059	0.466152	0.257133	66.0401
1	1039.33	13.328	4.89745	0.101454	0.491558	0.250293	80.7144
1	781.333	4.62532	5.03849	0.0762694	0.379846	0.258629	80.9591
1	1000.67	9.59303	4.47232	0.0976795	0.433417	0.277306	74.0949
1	637.667	12.3488	5.8771	0.0622454	0.359855	0.217113	78.9161
1	830.667	11.4292	5.83878	0.081085	0.465953	0.261815	74.272
1	724	17.1231	5.4461	0.0706728	0.38303	0.223915	78.6375
1	616.333	15.0882	5.55416	0.060163	0.331971	0.221543	66.6628
1	855.333	30.3403	5.12839	0.0834928	0.427795	0.257206	75.4783
1	744.333	20.1804	6.27193	0.0726577	0.44331	0.257871	84.3011
1	755	9.57763	5.79174	0.0736989	0.425372	0.245457	65.9286
1	903.333	23.6529	5.54343	0.0881783	0.466362	0.265062	72.0491
1	892.667	12.6987	4.75153	0.0871371	0.414704	0.277221	74.4575
1	876	32.1076	5.06496	0.0855102	0.43252	0.272222	59.1306
1	922.333	10.2238	5.10674	0.090033	0.458747	0.26725	64.0758
1	962.667	7.70914	4.35342	0.0939701	0.408705	0.293066	83.4339
1	826	17.7272	4.87734	0.0806295	0.391828	0.261754	74.9885
1	771.667	26.5277	6.07644	0.0753258	0.443376	0.253574	68.2715
1	971	23.2781	5.1637	0.0947836	0.487752	0.276724	68.7477
1	799.667	16.5597	5.28984	0.078059	0.411062	0.242581	69.879
1	724	26.686	5.69153	0.0706728	0.401954	0.256961	66.0247
1	790	11.5654	5.15401	0.0771154	0.397495	0.248875	85.5408
1	924.667	30.4012	5.03082	0.0902608	0.451456	0.270837	64.449
1	1005.33	12.5389	4.80343	0.098135	0.46647	0.259903	80.1625
1	820	8.23195	5.25621	0.0800438	0.416905	0.251565	79.7705
1	789.667	11.248	5.54508	0.0770828	0.427295	0.244083	74.7302
1	750.333	13.7773	5.53212	0.0732433	0.402408	0.240204	72.0883
1	995	13.0958	4.49795	0.0971263	0.43486	0.264979	68.8094
1	687	26.8149	5.98642	0.0670611	0.387574	0.262623	62.7429
1	909.667	13.7765	4.9941	0.0887966	0.437732	0.254125	75.3643
1	775.333	12.06	5.30597	0.0756837	0.398625	0.245353	65.5255
1	880	11.8141	5.71007	0.0859007	0.480999	0.249523	80.501
1	761.333	19.3083	5.44813	0.0743171	0.399295	0.253772	81.0406
1	779	36.4892	5.30979	0.0760416	0.403687	0.225174	74.5184
1	810.667	9.2143	5.20334	0.0791327	0.411568	0.24518	57.7228
1	577	28.8264	6.20956	0.0563235	0.347332	0.216806	62.0294
1	850.333	15.8759	5.66698	0.0830048	0.449859	0.256691	75.1546
1	916.667	41.1061	5.47608	0.0894799	0.485193	0.24266	78.3602
1	832.333	9.20214	4.94328	0.0812477	0.4012	0.263677	53.8766
1	974.667	10.8273	4.58484	0.0951415	0.430441	0.283733	76.7091
1	1096	11.338	4.22996	0.106985	0.449898	0.28967	75.6416
1	789.333	14.88	5.40874	0.0770503	0.411004	0.255839	63.3118
1	851.667	22.7035	5.39111	0.0831349	0.448175	0.24327	84.1461
1	714	17.0669	5.7886	0.0696967	0.39502	0.205362	70.2093
1	859.333	26.2701	5.16233	0.0838833	0.429244	0.253651	78.428
1	658	22.1107	5.69311	0.0642303	0.364109	0.221419	76.171
1	800.667	11.6076	4.8024	0.0781566	0.375024	0.257906	60.9281
1	657	9.29484	6.1617	0.0641327	0.394843	0.2337	70.2803
1	923.333	33.5567	5.09503	0.0901306	0.45862	0.26937	82.3882
1	990	28.5764	4.8398	0.0966383	0.465693	0.265094	84.7805
1	875	16.0057	4.95224	0.0854126	0.422311	0.266688	74.6656
1	572.667	8.6413	5.7888	0.0559005	0.322316	0.197542	74.8241
1	831	31.8601	5.34755	0.0811176	0.434569	0.255248	85.3753
1	898.667	13.688	4.83944	0.0877228	0.424419	0.264381	69.8437
1	823	13.4635	5.11872	0.0803366	0.40873	0.256172	82.7329
1	1005.67	45.2851	4.79938	0.0981675	0.470682	0.272465	71.6284
1	804	15.886	5.03248	0.078482	0.394669	0.259877	70.6643
1	797.667	9.51252	4.938	0.0778638	0.380385	0.256808	78.3685
1	960.667	14.8683	4.84708	0.0937749	0.450941	0.264732	63.8127
1	935.333	8.79002	4.75259	0.091302	0.432986	0.269622	78.8538
1	835.333	14.8489	5.36929	0.0815406	0.431534	0.265236	80.7761
1	792	15.2957	5.52801	0.0773106	0.427314	0.24067	81.8418
1	887	64.751	5.41101	0.086584	0.459795	0.277841	68.3138
1	837.333	10.4349	5.14602	0.0817358	0.419624	0.243778	75.2671
1	812.667	23.1124	5.30708	0.079328	0.41947	0.245608	69.2387
1	647.667	11.1066	6.19742	0.0632216	0.389603	0.239285	62.9454
1	918	32.7188	5.00771	0.08961	0.448155	0.271099	63.0709
1	752	25.8085	5.57473	0.073406	0.408104	0.233515	69.6559
1	870	12.5044	5.22622	0.0849245	0.436571	0.268792	73.5841
1	957	52.4324	4.70717	0.093417	0.438633	0.268058	67.2136
1	757.333	16.4185	5.29477	0.0739266	0.389731	0.247345	76.5594
1	1021.33	28.7716	4.74792	0.0996968	0.471984	0.247423	75.5525
1	898.333	11.4265	4.96708	0.0876903	0.433336	0.259313	76.8251
1	815	49.0203	5.37389	0.0795557	0.424489	0.26083	72.4874
1	868.333	24.951	5.10844	0.0847618	0.427051	0.266751	68.2434
1	850.667	12.6409	5.10444	0.0830373	0.419677	0.258043	67.1601
1	882.667	32.6043	5.82079	0.086161	0.487833	0.259709	75.628
1	861.333	11.2102	5.27069	0.0840785	0.433209	0.255655	82.0033
1	887.667	9.96437	4.99052	0.0866491	0.43199	0.26152	69.0861
1	952.333	13.1613	4.87105	0.0929614	0.44785	0.264656	73.466
1	858.333	13.4974	5.4126	0.0837857	0.441008	0.266195	83.3873
1	851	11.6901	5.35732	0.0830699	0.445026	0.251349	84.6034
1	673.333	12.1892	5.9716	0.065727	0.391844	0.230981	69.1014
1	772.333	30.6458	6.33196	0.0753909	0.463862	0.260856	74.9103
1	852	38.4045	5.12979	0.0831675	0.426282	0.247	66.4235
1	1018.33	22.0852	5.03518	0.099404	0.496544	0.266436	80.5269
1	817.333	9.92288	5.11466	0.0797835	0.40268	0.24854	85.3853
1	777	18.1891	5.78909	0.0758464	0.438045	0.240658	69.9735
1	884	21.1724	5.47131	0.0862911	0.470774	0.241853	78.8947
1	813.667	29.7463	5.31445	0.0794256	0.419136	0.246181	68.4337
1	813.333	10.9306	5.3146	0.079393	0.421796	0.25688	68.855
1	988.667	10.4636	4.58982	0.0965081	0.43816	0.273963	65.5152
1	868	8.64018	5.10941	0.0847293	0.430746	0.241236	83.7325
1	950.667	15.8205	4.90025	0.0927988	0.45358	0.265595	62.5883
1	895	48.1502	4.95853	0.0873649	0.431218	0.273656	78.4789
1	591.667	7.84062	6.2009	0.0577552	0.349629	0.233993	72.5738
1	916.667	24.4287	5.23516	0.0894799	0.467871	0.260067	71.6762
1	835.333	8.07951	5.252	0.0815406	0.427889	0.243521	78.6289
1	949.667	27.2273	5.08847	0.0927011	0.468916	0.26926	76.8718
1	797	20.6124	5.84317	0.0777987	0.448117	0.240861	82.9593
1	742.667	38.1563	5.60499	0.072495	0.406331	0.224468	70.7719
1	861	12.4759	5.09759	0.084046	0.428037	0.250606	82.7174
1	1010.67	16.5721	4.70749	0.0986556	0.463268	0.270297	77.055
1	892.667	20.5464	5.37738	0.0871371	0.465015	0.257273	73.647
1	820.333	10.1898	5.53385	0.0800763	0.442082	0.254458	81.5962
1	831	26.8315	5.36529	0.0811176	0.432716	0.26294	65.7471
1	766	21.0539	4.75332	0.0747726	0.355048	0.267027	60.3278
1	823	12.6845	5.17248	0.0803367	0.414996	0.254124	62.7707
1	867.667	17.3859	5.07986	0.0846968	0.427815	0.252887	53.8469
1	1068.67	31.3556	4.70715	0.104317	0.487012	0.288315	70.9243
1	919.333	13.5529	4.68583	0.0897402	0.417013	0.261264	84.9085
1	829.333	16.252	5.39886	0.0809549	0.435043	0.22709	71.2867
1	1017.33	22.3734	4.62657	0.0993064	0.457365	0.28189	62.3669
1	813	12.0764	5.10613	0.0793605	0.403249	0.246331	67.8841
1	1012.33	10.7294	4.9009	0.0988183	0.48271	0.263034	78.5404
1	993.667	23.2142	4.95559	0.0969962	0.480905	0.26959	67.9771
1	774.667	38.5554	6.33357	0.0756186	0.478273	0.231416	43.6888
1	1010.33	9.84987	4.579	0.0986231	0.449971	0.27861	72.0095
1	890	40.9331	5.22584	0.0868768	0.452805	0.265536	61.9291
1	824.667	12.6375	4.94034	0.0804993	0.396975	0.250819	76.1368
1	801	18.3871	5.20938	0.0781891	0.404806	0.240762	70.5628
1	720	10.3907	5.55374	0.0702824	0.386566	0.248856	78.2424
1	834	23.2802	5.19423	0.0814104	0.419401	0.233525	81.7462
1	840.667	13.2088	5.17169	0.0820612	0.421614	0.257202	78.8399
1	925.333	20.3981	4.88446	0.0903259	0.433073	0.251121	80.2724
1	946.667	10.5525	5.20526	0.0924083	0.469087	0.264997	79.5212
1	926.667	20.7432	4.88501	0.090456	0.441002	0.265834	66.6729
1	937	9.9533	4.63553	0.0914647	0.421175	0.266318	72.1902
1	634.333	12.5568	5.81394	0.0619201	0.357007	0.228667	60.0818
1	682.667	11.1144	5.42016	0.0666381	0.359919	0.229322	62.3578
1	1056	27.0472	4.93746	0.103081	0.49877	0.277188	75.7923
1	858.333	10.0598	5.28314	0.0837857	0.44013	0.263575	81.9319
1	796.667	32.2839	5.77595	0.0777661	0.445093	0.258577	66.8487
1	1075.67	28.9123	4.71575	0.105001	0.493316	0.284022	73.3951
1	867	30.1478	4.78624	0.0846317	0.403122	0.254255	62.5965
1	831	14.4123	5.30579	0.0811176	0.42803	0.241321	72.8681
1	807	14.0831	5.5889	0.0787748	0.439622	0.276903	66.8501
1	865.667	14.2253	5.21759	0.0845015	0.429331	0.275597	66.2034
1	1017.33	53.3432	4.80536	0.0993064	0.476961	0.261066	57.9587

## Sheet: phyb_nAT_B
Predicate	Pixel count	SSE	LS Ratio	Surface	Length	Width	Axes angle
1	865.5	9.83202	5.34379	0.0844853	0.449143	0.258969	62.3853
1	885	9.60734	4.85522	0.0863887	0.416402	0.25143	75.9799
1	718	29.5711	6.11735	0.0700871	0.422275	0.226774	75.789
1	910	10.793	5.17239	0.0888291	0.459271	0.246398	76.8973
1	782	4.59903	4.98193	0.0763345	0.380091	0.241089	79.4744
1	772	8.40774	4.6847	0.0753583	0.349405	0.237183	85.4374
1	870.5	7.5099	5.03592	0.0849733	0.424778	0.228831	83.6032
1	904	10.2946	4.855	0.0882434	0.427235	0.262366	86.1262
1	1160.5	11.6238	4.30923	0.113282	0.486806	0.290247	88.4978
1	1129.5	18.7098	4.07352	0.110255	0.446797	0.273806	67.5943
1	723.5	7.73632	5.21197	0.070624	0.365563	0.224257	74.1693
1	531	8.82899	6.43015	0.0518332	0.33191	0.195428	81.6504
1	1081	13.4916	4.50779	0.105521	0.474473	0.266585	88.2338
1	530	11.8317	6.2488	0.0517356	0.322688	0.183903	80.28
1	748	25.0647	5.33949	0.0730156	0.389538	0.218353	65.7107
1	1337.5	55.8529	4.14876	0.130559	0.542692	0.291584	80.4688
1	802	20.3513	5.50827	0.0782867	0.431222	0.241317	76.0967
1	1029.5	18.2758	4.76526	0.100494	0.463595	0.27989	80.1774
1	947.5	6.88666	4.95944	0.0924896	0.458647	0.256283	75.0013
1	1294	62.7751	4.14554	0.126313	0.522496	0.303842	62.8229
1	961	12.3277	4.94235	0.0938074	0.46258	0.274474	76.6323
1	916	13.7624	4.79309	0.0894148	0.42571	0.251985	67.5334
1	671	10.9534	5.82285	0.0654993	0.37578	0.2235	61.6505
1	1184	13.1313	4.37567	0.115575	0.505646	0.27664	80.4922
1	697	4.85671	5.4397	0.0680372	0.36718	0.207768	85.0422
1	1121	10.4683	4.34603	0.109426	0.474045	0.26129	81.8986
1	1039.5	12.4744	4.45235	0.10147	0.451622	0.26676	83.073
1	830.5	13.222	4.99671	0.0810688	0.405075	0.228945	86.0784
1	490	28.9692	6.42746	0.0478311	0.307432	0.163439	61.5849
1	964.5	11.1494	4.96919	0.0941491	0.467689	0.258109	84.5621
1	1042.5	9.63113	5.1196	0.101763	0.515245	0.269871	76.0237
1	771	8.41705	5.21839	0.0752607	0.390783	0.214249	81.6775
1	1144	14.0071	4.42416	0.111671	0.494049	0.276828	74.5905
1	1052.5	7.33038	4.55381	0.102739	0.467462	0.266848	84.891
1	767	29.573	5.59494	0.0748702	0.417883	0.209578	76.6781
1	1117.5	25.1287	4.69821	0.109084	0.50894	0.263331	75.8096
1	1045.5	11.3442	4.37532	0.102056	0.44643	0.277869	83.0407
1	951	8.5372	5.33496	0.0928313	0.492279	0.274603	76.662
1	1174.5	8.69406	4.27758	0.114648	0.490346	0.276614	71.9565
1	1056.5	12.3728	4.50871	0.10313	0.465435	0.298444	80.3322
1	825.5	7.94329	5.10043	0.0805807	0.406211	0.234045	80.6001
1	1052.5	20.7113	4.95354	0.102739	0.499055	0.238619	81.9856
1	1020.5	6.4475	4.44725	0.0996155	0.43831	0.260617	77.4388
1	686.5	5.66845	5.29546	0.0670123	0.354646	0.224005	74.081
1	832	12.7976	5.2818	0.0812152	0.429543	0.228521	75.31
1	765	10.9466	5.04357	0.074675	0.376656	0.246787	62.2607
1	1230	48.997	3.97475	0.120066	0.474952	0.305645	71.0063
1	1009.5	8.58718	4.87211	0.0985417	0.465744	0.270189	70.3199
1	1202.5	17.9695	4.08336	0.117381	0.474322	0.286665	89.7106
1	665.5	9.79237	6.01658	0.0649624	0.390829	0.212302	81.1851
1	1087.5	12.0506	4.54511	0.106156	0.478863	0.264961	71.0467
1	854	5.89163	4.79495	0.0833627	0.395601	0.242088	82.6282
1	1064.5	10.3326	4.39286	0.103911	0.456321	0.267282	78.0287
1	1254	17.374	4.38518	0.122408	0.528393	0.272376	86.2951
1	968.5	10.7614	4.93028	0.0945395	0.461216	0.250124	82.8397
1	1093.5	9.69409	4.07123	0.106741	0.433103	0.304435	77.7483
1	1342	6.71089	4.28261	0.130999	0.560364	0.289455	83.0345
1	1025.5	23.9657	4.49143	0.100104	0.450335	0.287723	63.9313
1	1070.5	12.3625	4.37579	0.104496	0.45757	0.287723	65.7449
1	1207.5	17.3472	4.1804	0.117869	0.48829	0.299209	86.8104
1	774.5	16.5579	5.16851	0.0756024	0.390934	0.23872	75.3543
1	1046.5	9.48408	4.4729	0.102153	0.453113	0.266859	83.1997
1	1158	10.5126	4.79529	0.113037	0.541938	0.284987	77.992
1	1173	12.2729	4.1598	0.114502	0.475929	0.274035	79.1082
1	959.5	9.81144	4.5828	0.093661	0.425515	0.259999	70.5094
1	1071.5	10.1629	4.18508	0.104594	0.437254	0.292636	70.1345
1	951.5	5.85642	4.64292	0.0928801	0.430696	0.265355	87.1342
1	949.5	10.7206	4.69445	0.0926849	0.434588	0.243346	88.8771
1	913.5	8.82005	4.92424	0.0891708	0.438735	0.255442	58.6232
1	917.5	10.0208	4.50291	0.0895612	0.402574	0.243341	77.1785
1	925	12.0961	4.92434	0.0902933	0.447302	0.285875	70.6455
1	1113	10.1022	4.02362	0.108645	0.438137	0.294735	77.6124
1	1165	27.9523	4.39898	0.113721	0.501128	0.287019	83.0443
1	1330.5	11.9113	3.91621	0.129876	0.50796	0.292816	83.1947
1	926.5	12.7598	5.33215	0.0904397	0.477261	0.290493	73.1901
1	1116.5	7.19991	4.37654	0.108986	0.476876	0.284489	80.6836
1	1118.5	16.6512	4.35091	0.109182	0.474494	0.263391	73.3615
1	1231	5.76579	4.14239	0.120163	0.496817	0.28158	80.4446
1	922.5	11.0116	4.72203	0.0900493	0.422131	0.292693	41.9905
1	1000.5	29.6468	4.37351	0.0976632	0.427349	0.282636	66.4824
1	810.5	17.7429	4.87018	0.0791165	0.383116	0.228811	68.9532
1	808	25.018	5.57529	0.0788724	0.436473	0.225637	76.8956
1	854.5	6.02301	5.00697	0.0834115	0.41476	0.26037	66.3789
1	600.5	10.3119	6.04227	0.0586174	0.354229	0.206747	71.6983
1	1265	58.3168	4.34431	0.123482	0.533322	0.292998	77.3857
1	975.5	8.62369	4.75939	0.0952228	0.446377	0.268449	79.7279
1	381	11.883	7.38411	0.0371911	0.26666	0.166484	82.3311
1	1125	8.30755	4.45809	0.109816	0.487101	0.25688	81.3871
1	1073.5	22.0671	4.40574	0.104789	0.461691	0.275586	64.7125
1	1265.5	8.30887	4.02502	0.123531	0.497191	0.29982	78.138
1	1222	11.9427	4.26687	0.119285	0.505917	0.26794	73.7701
1	1061	32.9315	4.52718	0.103569	0.469057	0.296328	76.6718
1	868	9.50425	5.01845	0.0847293	0.425258	0.238505	76.0012
1	777	7.59445	5.18394	0.0758464	0.390991	0.229105	84.5848
1	923	12.0277	4.96047	0.0900981	0.442928	0.267552	86.5755
1	990.5	22.2368	4.85497	0.0966871	0.469726	0.271032	81.9567
1	1091	23.9437	4.86231	0.106497	0.515245	0.275932	86.6738
1	910	13.0696	4.90458	0.0888291	0.435669	0.253677	79.5728
1	713.5	5.91263	5.47514	0.0696479	0.379612	0.215461	78.0188
1	813.5	2.5879	4.98941	0.0794093	0.3946	0.248155	78.7875
1	750	17.6684	4.97246	0.0732108	0.363997	0.215461	72.3305
1	943	13.8847	4.63658	0.0920504	0.422357	0.274086	82.3408
1	963	6.42406	4.71632	0.0940027	0.440803	0.262355	72.2934
1	869.5	13.1007	5.04139	0.0848757	0.425594	0.244465	85.2771
1	912	7.47895	4.654	0.0890243	0.413666	0.241198	56.4553
1	757.5	8.61383	5.51337	0.0739429	0.404803	0.228029	84.3911
1	955.5	32.5144	4.92675	0.0932706	0.458144	0.259417	60.997
1	1165	35.2286	4.43531	0.113721	0.502302	0.278999	66.7352
1	1360.5	17.7009	4.21807	0.132804	0.555504	0.297756	79.8186
1	1168.5	15.6564	4.37019	0.114062	0.497434	0.295374	81.8563
1	1168.5	34.8046	4.1285	0.114062	0.470364	0.29674	84.5353
1	708.5	6.19736	5.45987	0.0691598	0.374596	0.218353	75.8602
1	1105	4.29568	4.31125	0.107864	0.464715	0.27664	84.1235
1	1006	36.0329	4.50957	0.0982001	0.44339	0.25886	75.4493
1	1213	7.45702	4.7012	0.118406	0.548359	0.271411	86.7471
1	1050.5	27.099	4.60088	0.102544	0.468975	0.290418	61.9701
1	1325.5	27.7323	4.13187	0.129388	0.528254	0.288471	68.9041
1	718.5	10.7542	5.94049	0.0701359	0.412258	0.22892	80.9629
1	1020	8.94968	4.60793	0.0995667	0.458731	0.263527	80.0299
1	923.5	9.78642	5.09066	0.0901469	0.459662	0.275963	80.1692
1	1017	8.51057	4.40746	0.0992738	0.438328	0.284806	80.7719
1	965	24.0232	4.05392	0.0941979	0.376658	0.30469	42.3839
1	991	12.8054	4.7406	0.0967359	0.456258	0.279622	77.0095
1	1252	14.3947	3.98329	0.122213	0.484569	0.283224	80.2952
1	1240.5	14.5198	4.42475	0.121091	0.52735	0.288423	74.9191
1	1002	9.30185	4.51072	0.0978096	0.441081	0.248511	83.2398
1	652.5	15.9349	5.50583	0.0636934	0.352513	0.235446	72.842
1	1145.5	10.4098	4.31336	0.111817	0.47889	0.288512	76.8383
1	1067.5	10.6665	4.51991	0.104203	0.470662	0.27763	73.8734
1	1069.5	23.8523	4.80049	0.104399	0.501062	0.293872	75.4589
1	1188.5	18.2064	4.04433	0.116015	0.469364	0.285315	72.7915
1	1174	42.7142	4.14277	0.114599	0.473519	0.284411	62.6927
1	827	20.0328	4.75418	0.0807271	0.383711	0.23978	87.9853
1	899.5	48.4036	5.03062	0.0878041	0.426942	0.252473	69.515
1	1279.5	38.9909	3.96301	0.124898	0.495255	0.307669	72.6903
1	918.5	12.3357	4.76804	0.0896588	0.424554	0.24206	81.5046
1	691	7.8415	5.67838	0.0674516	0.387426	0.240384	85.6321
1	967	15.9776	5.02703	0.0943931	0.466109	0.266394	72.7098
1	1010.5	18.0989	4.50433	0.0986394	0.444056	0.25962	84.7996
1	1087	9.83434	4.83771	0.106107	0.511687	0.27987	76.4075
1	843	21.4562	5.23473	0.0822889	0.430268	0.242983	81.0307
1	948	6.48084	4.54567	0.0925384	0.416934	0.273744	62.4776
1	1324.5	29.7747	4.02368	0.12929	0.519753	0.306768	78.3039
1	673	7.41341	5.67269	0.0656945	0.369348	0.202988	78.8191
1	1235.5	16.6824	4.29642	0.120603	0.507549	0.272018	80.5971
1	792.5	7.90241	5.35466	0.0773594	0.409152	0.250549	77.2988
1	888.5	7.577	4.58097	0.0867304	0.395927	0.253677	83.9985
1	1384.5	37.9547	3.98264	0.135147	0.535285	0.306598	64.9958
1	961	12.7485	4.7011	0.0938074	0.439916	0.25688	72.7112
1	1022.5	12.7348	4.59715	0.0998107	0.454785	0.248797	75.5713
1	1089.5	12.6024	4.59946	0.106351	0.478786	0.269794	85.0507
1	948	8.88222	4.83839	0.0925384	0.435378	0.264299	74.2018
1	1077	22.9586	4.69201	0.105131	0.494025	0.27822	75.6521
1	1049.5	9.17139	4.24703	0.102446	0.434372	0.265317	82.4629
1	972	40.3674	5.39991	0.0948812	0.5119	0.277563	68.8162
1	1038	23.724	4.91	0.101324	0.486136	0.266072	75.858
1	1199.5	8.51431	4.30353	0.117088	0.503658	0.290845	67.9989
1	1147.5	23.6752	4.45126	0.112013	0.495065	0.297165	68.4545
1	1371	19.2666	4.11328	0.133829	0.545218	0.291402	83.2018
1	948	26.3286	5.80993	0.0925384	0.531397	0.259634	80.1793
1	1067	11.9927	4.80902	0.104155	0.500598	0.265666	88.9433
1	929.5	28.7404	5.57525	0.0907326	0.505885	0.26794	57.1922
1	1109	6.52763	4.39826	0.108254	0.467077	0.277189	81.0848
1	1253.5	16.5054	4.07908	0.12236	0.496899	0.2964	80.5408
1	1171.5	14.492	4.40049	0.114355	0.504075	0.291254	75.8732
1	1114.5	6.28433	4.32394	0.108791	0.46969	0.272929	79.8587
1	890	6.06389	4.93108	0.0868768	0.428197	0.270238	83.3834
1	743.5	10.5084	5.53316	0.0725763	0.401723	0.233527	68.8337
1	1378	10.2143	4.01335	0.134513	0.537584	0.289597	86.2037
1	1055.5	9.59477	4.52038	0.103032	0.464031	0.262215	81.0888
1	1195.5	13.3086	4.33781	0.116698	0.500683	0.29146	78.0927
1	818.5	28.7815	6.18775	0.0798974	0.45895	0.258489	63.3255
1	1230.5	14.6549	4.35845	0.120115	0.522868	0.293748	81.6806
1	1152.5	23.8743	4.06068	0.112501	0.456234	0.275114	77.9171
1	923.5	7.35518	4.51842	0.0901469	0.407223	0.270626	81.137
1	1004	19.2548	4.45081	0.0980049	0.434636	0.272095	60.9775
1	974.5	7.20029	5.13553	0.0951252	0.468768	0.27934	77.8315
1	1119.5	17.8178	4.55333	0.109279	0.493027	0.270209	73.2359
1	1045.5	6.55237	4.45465	0.102056	0.456343	0.272929	76.4808
1	968.5	13.49	4.79473	0.0945395	0.453293	0.243377	78.2155
1	929	40.6658	4.93436	0.0906838	0.446439	0.267763	76.3437
1	790.5	10.9763	5.06732	0.0771642	0.389683	0.223833	85.4782
1	689	8.02452	5.22551	0.0672563	0.350165	0.216838	76.4946
1	853.5	18.1674	4.82456	0.0833139	0.401122	0.235982	54.2175
1	1135	17.0227	4.32679	0.110792	0.473974	0.28652	82.1639
1	761	6.51344	5.25429	0.0742846	0.390075	0.22773	78.4894
1	863.5	5.1658	4.77899	0.08429	0.402178	0.23912	78.0383
1	1027.5	17.6748	4.77458	0.100299	0.479445	0.267989	68.7915
1	1012.5	13.2146	4.64251	0.0988346	0.455464	0.294735	74.7443
1	880	8.75029	4.74732	0.0859007	0.401528	0.247	78.1853
1	892.5	5.01343	4.76419	0.0871209	0.412126	0.27989	61.9363
1	1199	8.57017	4.35088	0.11704	0.509362	0.284399	73.7644
1	835.5	9.54726	5.15627	0.0815568	0.41832	0.229573	80.2245
1	976.5	12.6839	4.90013	0.0953205	0.467028	0.247	82.9933
1	1053.5	13.8909	4.4776	0.102837	0.459634	0.294983	72.6334
1	824.5	7.24041	5.27285	0.0804831	0.416272	0.237499	81.2704
1	879	10.3729	5.12074	0.0858031	0.435984	0.253575	80.2865
1	1065	11.1024	4.44116	0.103959	0.456568	0.267171	82.2111
1	1293	25.837	4.15377	0.126215	0.523264	0.290137	76.359
1	1171.5	15.0553	4.3616	0.114355	0.498552	0.274285	82.7234
1	716	28.0631	5.38373	0.0698919	0.376159	0.208783	68.4219
1	1448.5	34.6402	3.92511	0.141394	0.553677	0.305728	76.5136
1	1138.5	11.9424	4.40472	0.111134	0.489333	0.268216	77.3472
1	1381	43.278	4.02657	0.134805	0.537449	0.281348	87.1304
1	1150	28.4682	4.39162	0.112257	0.490903	0.29248	85.795
1	922.5	10.2757	4.59016	0.0900493	0.412138	0.255023	86.3837
1	1062	8.75526	4.82643	0.103666	0.500238	0.267299	79.0815
1	1120	21.8275	4.68193	0.109328	0.490429	0.275814	70.8969
1	713.5	4.53764	5.18208	0.0696479	0.35993	0.220031	63.5059
1	802.5	20.974	5.27236	0.0783356	0.412475	0.23218	65.6704
1	908	6.05645	4.59591	0.0886339	0.407281	0.249446	66.4028
1	752	5.53795	5.17309	0.073406	0.377898	0.232946	77.7716
1	817.5	4.41988	5.37989	0.0797998	0.433934	0.239677	81.1373
1	1253	17.8526	4.06494	0.122311	0.49552	0.307249	79.8954
1	865.5	6.32819	4.55816	0.0844853	0.384765	0.242471	80.9796
1	717.5	5.09875	5.56846	0.0700383	0.382136	0.227358	61.4239
1	1097.5	6.09461	4.49931	0.107132	0.475915	0.277643	76.1595
1	1004	7.02617	4.73467	0.0980049	0.460083	0.25134	78.6901
1	614	6.27598	5.60761	0.0599352	0.33582	0.210021	82.3449
1	1178.5	33.1984	3.98699	0.115039	0.458595	0.296881	71.9151
1	1194.5	14.7439	4.49301	0.1166	0.520298	0.291789	78.498
1	973.5	29.3048	5.47662	0.0950276	0.491621	0.255298	72.7746
1	1165.5	7.30369	4.21631	0.11377	0.479693	0.280572	75.9221
1	852.5	28.0982	5.2182	0.0832163	0.43168	0.237499	78.7061
1	930	10.8855	4.75909	0.0907814	0.425828	0.27484	69.8983
1	1043.5	6.06714	4.52702	0.101861	0.459662	0.270377	81.7682
1	1286	7.6626	4.09019	0.125532	0.510712	0.292616	87.3069
1	908	21.5627	5.27514	0.0886339	0.466209	0.225074	75.8945
1	668.5	5.68342	5.1921	0.0652552	0.336862	0.214805	82.8772
1	756.5	7.62851	5.8437	0.0738453	0.426828	0.252258	71.2246
1	852	12.7609	5.18387	0.0831675	0.428927	0.233765	79.1722
1	965	10.9404	5.05544	0.0941979	0.461321	0.2744	75.3978
1	1106	17.5123	4.50633	0.107962	0.486567	0.288652	80.3001
1	1159.5	7.19107	4.82154	0.113184	0.545325	0.28333	84.2618
1	803.5	6.15192	5.0148	0.0784332	0.388693	0.243289	74.3027
1	1031	19.6374	4.47637	0.10064	0.448125	0.280016	76.8937
1	987.5	30.397	4.48841	0.0963942	0.43406	0.283184	85.3159
1	1122	10.1853	4.31108	0.109523	0.470182	0.275696	80.6342
1	1185.5	20.3213	4.43525	0.115722	0.513033	0.279738	76.9733
1	989	7.38226	4.65614	0.0965406	0.446983	0.26182	83.1572
1	933.5	7.83805	5.0933	0.091123	0.46406	0.280257	81.479
1	1162	39.2845	4.47256	0.113428	0.505165	0.277643	84.5572
1	602.5	15.3867	6.11653	0.0588127	0.355105	0.209027	76.7175
1	1159.5	9.87489	4.15871	0.113184	0.470541	0.272125	86.7082
1	1169.5	13.1541	4.57256	0.11416	0.507556	0.268116	80.2553
1	839.5	12.4023	5.44821	0.0819473	0.446953	0.22895	74.592
1	849	8.43754	5.57182	0.0828746	0.460931	0.259395	81.8599
1	587.5	14.9285	6.3952	0.0573485	0.3653	0.198147	81.3303
1	961	12.3282	4.94661	0.0938074	0.464764	0.266905	70.5245
1	1108	17.1876	5.20857	0.108157	0.54349	0.275248	85.5772
1	986.5	25.2655	4.89591	0.0962966	0.470491	0.26018	76.2762
1	950.5	21.5373	4.78846	0.0927825	0.444065	0.257275	81.9957
1	1395	10.1349	3.89575	0.136172	0.528833	0.29763	80.2657
1	995	13.0296	5.32783	0.0971263	0.517349	0.283907	78.2619
1	1065	10.2734	4.94796	0.103959	0.512216	0.280147	70.0875
1	623.5	26.3512	5.66668	0.0608626	0.343694	0.208891	75.0749
1	1067.5	12.7209	4.44253	0.104203	0.462323	0.255491	75.0932
1	1296.5	13.308	4.0249	0.126557	0.509275	0.29146	78.7069
1	876.5	11.6056	5.15984	0.085559	0.441239	0.24409	76.4182
1	798	13.2142	5.17407	0.0778963	0.40179	0.238171	73.4473
1	977.5	15.7261	4.49546	0.0954181	0.428949	0.262823	82.8677
1	1073.5	17.6068	4.38571	0.104789	0.450617	0.288026	70.8073
1	1078.5	20.6709	4.50256	0.105277	0.468924	0.278186	78.1128
1	1177.5	14.9153	4.51992	0.114941	0.51169	0.28004	80.1531
1	1218.5	14.9314	4.13296	0.118943	0.487949	0.290901	83.1792
1	1120	7.94574	4.7143	0.109328	0.513636	0.28652	83.7437
1	957	5.62	4.48524	0.093417	0.416587	0.253432	82.6686
1	700.5	5.38164	5.19169	0.0683789	0.351385	0.217771	83.1163
1	1088	6.3982	4.27842	0.106204	0.450938	0.266489	84.2038
1	1055	6.11201	4.58888	0.102983	0.467278	0.269095	82.6929
1	555	3.60601	5.9374	0.054176	0.318395	0.209086	81.5362
1	905.5	6.09253	4.54223	0.0883898	0.400197	0.25049	82.8561
1	1185	5.59193	3.88667	0.115673	0.448564	0.301425	77.9835
1	1132.5	19.9743	4.24225	0.110548	0.468067	0.281909	83.6157
1	901.5	10.0259	5.28269	0.0879994	0.450761	0.238126	69.8779
1	981.5	6.22595	4.3338	0.0958085	0.415353	0.263049	67.7831
1	1081.5	17.2358	4.8839	0.10557	0.5138	0.256218	81.8024
1	1041.5	10.1877	4.47646	0.101665	0.452339	0.281049	79.8232
1	1110	10.1813	4.03801	0.108352	0.436175	0.282892	74.0819
1	990	8.73253	4.30872	0.0966383	0.417003	0.289106	81.1877
1	1163	6.32744	4.31069	0.113526	0.489376	0.299738	79.4812
1	750.5	8.91952	5.64344	0.0732596	0.414355	0.233358	72.723
1	1112	10.4521	4.67276	0.108547	0.500168	0.277974	79.2844
1	1189.5	8.41124	4.62439	0.116112	0.534343	0.276519	86.9085
1	1035.5	14.412	4.52972	0.10108	0.457579	0.258155	83.9814
1	1142	6.92838	4.11196	0.111476	0.456997	0.274146	86.5677
1	955	45.5985	4.76759	0.0932218	0.44431	0.262632	67.8766
1	1253.5	11.8546	4.14096	0.12236	0.502517	0.284347	85.6423
1	1121	9.70805	4.41348	0.109426	0.47929	0.293084	72.3633
1	815.5	8.19821	5.06589	0.0796045	0.396139	0.230578	79.4563
1	1008	9.64497	4.51295	0.0983953	0.443618	0.275629	87.0313
1	1190.5	11.214	4.25897	0.11621	0.496426	0.290688	80.2557
1	1033.5	12.9991	4.47753	0.100884	0.449335	0.26676	79.4881
1	1071.5	8.80882	4.41314	0.104594	0.460921	0.277432	85.3994
1	932.5	33.0548	4.83576	0.0910254	0.435873	0.257883	73.2022
1	1089	9.87541	4.24213	0.106302	0.450814	0.291746	73.405
1	1052	9.72336	4.29994	0.10269	0.439209	0.279705	85.3488
1	972.5	18.1652	4.60786	0.09493	0.437349	0.232609	76.8051
1	1002.5	20.474	4.70021	0.0978584	0.454942	0.269063	83.5381
1	743.5	6.09506	4.99937	0.0725763	0.36258	0.231209	61.6774
1	1104	12.3883	4.17181	0.107766	0.448922	0.285868	83.7852
1	1020.5	11.6822	4.50229	0.0996155	0.448537	0.286472	67.8323
1	1020.5	5.85679	4.27334	0.0996155	0.425688	0.26182	83.6028
1	1125	47.9506	4.42713	0.109816	0.486032	0.282994	80.9984
1	1107	15.4353	4.36502	0.108059	0.471403	0.289597	70.4643
1	1013.5	7.53341	4.41515	0.0989322	0.432861	0.266591	85.0264
1	947.5	16.2298	4.66832	0.0924896	0.431368	0.281958	76.4508
1	1105.5	7.37169	4.52626	0.107913	0.485078	0.293521	86.726
1	627.5	6.26511	5.68589	0.061253	0.346775	0.203681	68.8013
1	1139	8.87248	4.32969	0.111183	0.476705	0.2671	78.3434
1	1015.5	10.1306	4.40932	0.0991274	0.436751	0.283006	73.6971
1	948.5	13.6094	4.73947	0.0925873	0.439604	0.253465	76.6498
1	1073.5	15.4433	4.82217	0.104789	0.489312	0.288026	84.303
1	853.5	13.8896	4.69921	0.0833139	0.391551	0.238857	63.409
1	1140	24.9653	4.78125	0.11128	0.527817	0.273522	65.6637
1	1188.5	18.1905	4.15899	0.116015	0.477637	0.294765	76.1164
1	1006	13.6978	4.91338	0.0982001	0.48299	0.284229	86.9535
1	1278.5	11.5777	4.24091	0.1248	0.521871	0.292058	80.8669
1	1046	24.426	4.48017	0.102105	0.451984	0.26496	73.8586
1	1192	12.3522	4.45976	0.116356	0.507083	0.281259	81.0287
1	1264.5	9.88034	4.27983	0.123433	0.520078	0.294302	84.5122
1	766.5	11.5815	5.67289	0.0748214	0.414371	0.232649	74.0234
1	994	24.3927	5.19424	0.0970287	0.503448	0.269352	68.7902
1	1288	6.58498	4.09341	0.125727	0.511727	0.288184	82.7283
1	825	14.0181	5.97143	0.0805319	0.480621	0.259148	65.9189
1	1195.5	16.6204	4.27763	0.116698	0.496564	0.282229	85.6791
1	1116	9.37106	4.40544	0.108938	0.471766	0.29977	68.8591
1	1084	8.21989	4.25744	0.105814	0.449424	0.27698	74.7859
1	1033	20.3439	4.39928	0.100836	0.440115	0.282771	82.6955
1	1061.5	4.74678	4.48221	0.103618	0.459512	0.281259	71.215
1	1234.5	38.6472	4.13858	0.120505	0.496866	0.293829	82.6277
1	1033	7.02545	4.75278	0.100836	0.473535	0.2551	86.3011
1	966	6.02345	4.53447	0.0942955	0.425372	0.274954	82.5198
1	831	4.65203	4.815	0.0811176	0.390554	0.23712	77.5853
1	1178.5	7.19909	4.33595	0.115039	0.496805	0.285921	79.3182
1	952.5	8.23944	4.90977	0.0929777	0.454748	0.265287	71.2238
1	1050	11.0905	5.14736	0.102495	0.509544	0.279988	76.1462
1	1034	24.2756	4.41683	0.100933	0.44649	0.273084	59.8266
1	1134.5	11.1965	4.35106	0.110744	0.482135	0.300251	81.919
1	1287.5	10.9127	4.21216	0.125679	0.52922	0.296995	81.3102
1	981.5	43.9536	4.86478	0.0958085	0.460683	0.263	83.0803
1	1178.5	21.0471	4.71186	0.115039	0.539532	0.280642	84.5492
1	688.5	5.57492	5.48806	0.0672075	0.366164	0.210442	75.2119
1	1032	25.7063	4.85528	0.100738	0.487526	0.26352	71.1479
1	688	17.3716	5.07191	0.0671587	0.340623	0.232118	57.7653
1	1116	9.27444	4.24199	0.108938	0.459955	0.279894	84.6122
1	685	3.42149	5.07664	0.0668659	0.339099	0.21736	79.2334
1	1054.5	4.80672	4.26148	0.102934	0.431738	0.283091	82.1904
1	1214	9.33617	4.09388	0.118504	0.485236	0.295393	73.5482
1	1043	26.062	4.51718	0.101812	0.459825	0.26946	84.0114
1	1229	13.9568	4.09855	0.119968	0.487501	0.284552	80.217
1	1340.5	14.8239	4.17055	0.130852	0.542363	0.304678	83.0835
1	910	10.5634	4.861	0.0888291	0.42276	0.254056	63.3368
1	1145.5	8.16503	4.24491	0.111817	0.474787	0.272448	67.6761
1	956.5	13.9618	4.69569	0.0933682	0.436283	0.250025	74.3877
1	989	13.9606	4.76493	0.0965406	0.460269	0.282364	78.2042
1	898.5	6.63723	4.79409	0.0877065	0.413577	0.235434	83.5027
1	1164	20.4538	4.47453	0.113623	0.508436	0.280771	82.2098
1	841.5	11.0207	5.00737	0.0821425	0.410555	0.233962	84.345
1	889	18.6471	5.95453	0.0867792	0.516696	0.261277	87.1406
1	855	6.22864	4.85047	0.0834603	0.404417	0.256232	79.309
1	1026	11.7878	4.65134	0.100152	0.464584	0.272703	75.3543
1	1185.5	33.0771	4.18202	0.115722	0.482855	0.300314	64.9539
1	1207	13.5703	4.0741	0.117821	0.478251	0.286759	87.6491
1	828.5	6.61772	4.8089	0.0808735	0.391627	0.258083	71.5867
1	996	9.28748	5.02384	0.0972239	0.477755	0.270753	70.5202
1	967	10.5682	4.82635	0.0943931	0.45467	0.247206	85.9349
1	1206.5	8.19249	4.46837	0.117772	0.525929	0.289967	75.4169
1	1167.5	16.6378	4.1262	0.113965	0.470237	0.282984	80.6071
1	1013.5	18.3933	4.70078	0.0989322	0.464946	0.281259	83.8429
1	976	20.8938	4.56333	0.0952717	0.430261	0.274485	67.8528
1	912.5	12.4706	4.63713	0.0890731	0.412412	0.244553	80.7365
1	883.5	7.48954	5.42999	0.0862423	0.467794	0.263176	76.6106
1	1318.5	17.49	4.13025	0.128705	0.53142	0.279894	84.6498
1	1177	7.92596	4.25559	0.114892	0.48363	0.303471	77.2062
1	824	10.2938	5.35522	0.0804343	0.422032	0.256448	72.5652
1	809	11.9957	5.72834	0.07897	0.452477	0.243349	82.9007
1	923.5	10.0427	5.26032	0.0901469	0.455873	0.25134	66.9893
1	794	15.3623	5.16363	0.0775058	0.396815	0.22665	81.0766
1	1229.5	15.6575	4.33884	0.120017	0.519724	0.280941	79.7296
1	1164	11.0905	4.23868	0.113623	0.476382	0.285539	73.2454
1	801	6.6544	5.13476	0.0781891	0.398725	0.260528	76.1288
1	941.5	13.1374	5.04524	0.091904	0.459818	0.268164	82.5175
1	802	32.7341	5.31689	0.0782867	0.415915	0.239875	81.3355
1	1050	23.7407	4.42547	0.102495	0.451332	0.272916	75.2674
1	1326	29.2203	4.16718	0.129437	0.532623	0.30881	77.9776
1	1078.5	14.4883	4.50239	0.105277	0.47385	0.276969	74.0086
1	811	13.0414	5.6059	0.0791653	0.443679	0.22724	76.2052
1	681.5	4.689	6.32971	0.0665242	0.419281	0.244875	72.5979
1	1017	12.9	4.43057	0.0992738	0.438748	0.255389	86.9975
1	1010	28.134	4.71402	0.0985905	0.463841	0.2717	77.8905
1	971	4.82124	4.58999	0.0947836	0.43253	0.25505	83.2486
1	882.5	19.7613	5.1311	0.0861447	0.439048	0.253998	62.9912
1	600.5	12.2715	5.52814	0.0586174	0.322995	0.211769	32.5094
1	1123.5	13.8336	4.17709	0.10967	0.45359	0.292935	82.0252
1	858.5	20.668	4.9221	0.083802	0.410579	0.245864	72.9173
1	1000.5	18.8989	4.56306	0.0976632	0.444318	0.289899	67.1024
1	811	6.52029	5.22254	0.0791653	0.407993	0.224257	84.9294
1	1128.5	12.8368	4.73719	0.110158	0.510233	0.274954	83.7356
1	699.5	8.4062	5.31359	0.0682813	0.359637	0.2174	78.1853
1	1097	24.0532	4.4765	0.107083	0.474694	0.256829	83.854
1	1228.5	7.74552	4.11101	0.119919	0.492696	0.285835	76.3688
1	1172	25.8796	4.3512	0.114404	0.496098	0.297121	62.9306
1	1212.5	12.1457	4.11846	0.118357	0.484011	0.293504	84.2439
1	1081.5	18.7843	4.49348	0.10557	0.473998	0.258109	64.4881
1	702	20.7109	5.54261	0.0685253	0.374551	0.21229	77.9592
1	794	9.01114	5.06937	0.0775058	0.392342	0.228188	85.1084
1	508	7.39179	5.85203	0.0495881	0.289136	0.190224	68.1094
1	1159	11.5128	4.20006	0.113135	0.474086	0.28506	69.0766
1	1185	12.3781	4.04089	0.115673	0.467068	0.281346	67.5619
1	1128.5	9.53525	4.70037	0.110158	0.517653	0.285284	84.0114
1	681	6.5102	5.69674	0.0664754	0.378307	0.19747	82.3025
1	1100	13.6788	4.27916	0.107376	0.45767	0.262604	68.197
1	1089	10.5602	4.44367	0.106302	0.472228	0.291899	67.3386
1	1115	16.3025	4.81992	0.10884	0.522916	0.2699	88.0715
1	909.5	30.2944	6.34487	0.0887803	0.562103	0.27402	68.1162
1	1234.5	18.0191	4.39767	0.120505	0.527583	0.281648	79.3627
1	1062.5	12.7674	4.41373	0.103715	0.457502	0.25997	85.6533
1	834	10.0351	5.18505	0.0814104	0.421254	0.233751	78.4542
1	1056	22.9428	4.63295	0.103081	0.467887	0.274307	72.0588
1	878	10.3402	5.21291	0.0857054	0.446747	0.246503	71.1501
1	998	40.5138	4.72265	0.0974192	0.45984	0.252335	82.0515
1	1027	17.1305	4.67531	0.10025	0.466953	0.257354	66.586
1	1111	14.552	4.27849	0.10845	0.464784	0.282028	80.134
1	1233	7.9	4.12818	0.120359	0.496857	0.282936	77.1888
1	1374.5	12.5967	4.01312	0.134171	0.537801	0.295138	81.2791
1	876.5	7.49068	5.21667	0.085559	0.445959	0.252832	76.9403
1	1221.5	12.9243	4.49975	0.119236	0.532133	0.293817	70.5283
1	733	11.5998	5.60486	0.0715514	0.399045	0.209732	82.4734
1	925.5	19.7361	4.38148	0.0903421	0.393819	0.290504	73.7318
1	1026	23.6953	4.33983	0.100152	0.434051	0.268233	73.6575
1	970.5	8.54053	4.72051	0.0947348	0.446822	0.258953	81.6019
1	1145.5	6.87466	4.28909	0.111817	0.476136	0.285595	79.1617
1	809.5	16.4716	5.24316	0.0790189	0.411165	0.226451	82.2451
1	1042	9.52748	4.55828	0.101714	0.462743	0.268412	67.2573
1	1232.5	13.5872	4.42038	0.12031	0.531546	0.284469	75.8422
1	715.5	8.2734	5.77474	0.0698431	0.401579	0.241306	63.5557
1	1054.5	7.6112	4.42641	0.102934	0.455329	0.27867	71.2485
1	935.5	8.34953	4.7449	0.0913183	0.433254	0.252039	73.8554
1	725	26.181	5.19873	0.0707704	0.368305	0.24984	71.0076
1	1059.5	12.3233	4.38442	0.103422	0.453396	0.2717	80.5377
1	818	6.15991	5.07576	0.0798486	0.403795	0.238619	56.1901
1	830	11.1984	5.75387	0.08102	0.465255	0.263717	61.8685
1	1177	49.3111	4.92478	0.114892	0.556058	0.277784	72.476
1	959.5	12.8393	4.62402	0.093661	0.432725	0.249359	79.811
1	1164.5	20.4646	4.96449	0.113672	0.540408	0.280754	77.9131
1	746	18.235	5.10417	0.0728203	0.371914	0.228246	81.7585
1	1302	28.124	3.98091	0.127094	0.501347	0.292935	81.6393
1	1133	7.24241	4.52136	0.110597	0.49527	0.276511	79.9812
1	1084	6.50353	4.45997	0.105814	0.470634	0.25688	81.4134
1	1177	19.2108	4.58771	0.114892	0.509982	0.294918	66.6069
1	1381	41.6971	3.9256	0.134805	0.531643	0.308581	84.8056
1	965.5	7.67054	4.40325	0.0942467	0.414901	0.270626	68.8168
1	1049	6.20928	4.40806	0.102398	0.448978	0.271415	76.2214
1	1229.5	16.4477	4.37718	0.120017	0.522754	0.279978	85.1484
1	1112	16.4497	4.34131	0.108547	0.471286	0.312575	63.1098
1	985	14.3154	4.58	0.0961502	0.439532	0.266166	75.1126
1	903	10.5496	4.60584	0.0881458	0.401348	0.247	84.9179
1	1216.5	14.5323	4.2155	0.118748	0.497445	0.289894	74.8916
1	1043	5.87954	4.393	0.101812	0.445352	0.263224	85.5925
1	1122	28.5775	4.38973	0.109523	0.478474	0.27698	62.5247
1	967	12.3825	4.9711	0.0943931	0.462058	0.259809	79.8139
1	1258.5	11.3385	4.14199	0.122848	0.504925	0.28652	80.5655
1	863	5.13186	5.22826	0.0842412	0.437164	0.249287	77.0254
1	1181	7.73647	4.05676	0.115283	0.467392	0.296752	84.0283
1	1263	20.0009	4.12888	0.123287	0.508229	0.282807	87.4999
1	1000	10.2505	4.47962	0.0976144	0.436808	0.25764	81.4944
1	1063.5	9.30016	4.84737	0.103813	0.503094	0.270674	80.7328
1	986.5	25.1014	5.15397	0.0962966	0.487808	0.282889	64.6036
1	1159	9.65757	4.5238	0.113135	0.511569	0.286288	80.931
1	1256	9.10024	4.20237	0.122604	0.512713	0.293439	86.8129
1	1249.5	12.0167	4.09051	0.121969	0.495134	0.289351	70.094
1	1176.5	7.25463	4.54589	0.114843	0.520547	0.288215	81.3964
1	1530.5	20.37	4.06696	0.149399	0.60749	0.306362	72.294
1	1192	9.05678	4.19237	0.116356	0.485825	0.29146	71.7772
1	807	19.6473	5.0864	0.0787748	0.400435	0.240881	86.9057
1	793.5	12.0356	5.98517	0.077457	0.445173	0.248074	71.8366
1	1012.5	14.9943	4.31899	0.0988346	0.426116	0.305187	55.1688
1	935	12.9802	4.56282	0.0912695	0.415394	0.275629	87.6218
1	1102.5	9.38018	4.72873	0.10762	0.500172	0.270267	77.7078
1	838	14.5248	5.01728	0.0818009	0.413759	0.261089	86.1945
1	1182	25.7371	4.21039	0.11538	0.482683	0.297544	63.0137
1	1180	28.2545	4.24261	0.115185	0.488385	0.2717	85.839
1	831	16.9861	5.04001	0.0811176	0.410888	0.267121	75.4874
1	986	7.6461	4.60722	0.0962478	0.443934	0.275457	84.7757
1	1178.5	9.87584	4.29008	0.115039	0.492137	0.282986	79.7087
1	1084.5	16.4131	4.2383	0.105863	0.448564	0.273207	83.469
1	943.5	13.2472	4.73698	0.0920992	0.43774	0.268856	80.0383
1	1108.5	9.041	4.20312	0.108206	0.452693	0.286048	87.5797
1	1143	8.4782	4.16292	0.111573	0.463534	0.273806	72.244
1	1355.5	47.9766	3.78431	0.132316	0.500632	0.300514	84.1401
1	1066.5	44.6031	4.60743	0.104106	0.477106	0.270927	79.4438
1	1092	8.78632	4.24502	0.106595	0.45075	0.285648	73.3536
1	1101	19.6266	4.23856	0.107473	0.452554	0.296767	67.2352
1	1232	25.8194	4.31995	0.120261	0.519283	0.281932	84.6597
1	953.5	14.5372	4.24087	0.0930753	0.394485	0.288453	69.6056
1	990.5	14.6369	4.67465	0.0966871	0.450272	0.254045	83.2779
1	1167.5	14.5183	4.28577	0.113965	0.488627	0.274246	89.1846
1	1026.5	25.3616	5.15143	0.100201	0.504003	0.275076	63.4514
1	1254.5	34.782	4.25789	0.122457	0.521681	0.28922	71.8422
1	1289	13.482	4.10962	0.125825	0.517093	0.28158	79.6705
1	977.5	7.31607	4.74114	0.0954181	0.452447	0.282229	73.9235
1	1035.5	9.60608	4.51612	0.10108	0.451053	0.268886	81.2369
1	964	10.0005	4.60488	0.0941003	0.433254	0.278999	63.2961
1	1082.5	6.29972	4.51467	0.105668	0.47313	0.251232	80.5509
1	1233.5	11.5679	4.10163	0.120407	0.493035	0.271129	79.5956
1	1047	31.4618	4.29064	0.102202	0.432411	0.277484	63.4732
1	1115.5	9.60554	4.49367	0.108889	0.490986	0.285197	82.5045
1	1137.5	21.5875	4.56328	0.111036	0.506151	0.272065	85.4766
1	704	15.4051	4.93661	0.0687205	0.33953	0.240769	53.7908
1	1304.5	10.5796	4.26466	0.127338	0.53743	0.275149	83.0899
1	746	26.4501	5.35733	0.0728203	0.38897	0.237943	70.5299
1	904	5.9514	4.7179	0.0882434	0.410998	0.264619	81.6181
1	1101	13.0294	4.48	0.107473	0.479914	0.288032	72.8486
1	972.5	21.3563	4.8848	0.09493	0.462513	0.24007	66.9715
1	889.5	5.24813	4.75993	0.086828	0.409441	0.236331	84.2056
1	1223.5	25.2428	4.62942	0.119431	0.543715	0.282372	76.8327
1	978.5	9.2132	4.6889	0.0955157	0.447921	0.278926	68.124
1	1122.5	18.2436	4.67588	0.109572	0.499907	0.26216	80.3698
1	1109	17.7079	4.48824	0.108254	0.485877	0.291699	67.9746
1	997	15.79	4.59226	0.0973216	0.443761	0.268218	78.0387
1	1179.5	13.124	4.28339	0.115136	0.490711	0.28652	73.7056
1	988	34.7831	4.44772	0.096443	0.426477	0.26997	75.8028
1	909.5	5.76046	4.65724	0.0887803	0.410525	0.247448	69.784
1	795.5	16.0423	5.00148	0.0776523	0.388388	0.261241	68.6791
1	1173	18.5392	4.55094	0.114502	0.521424	0.286608	84.6567
1	1060	34.615	4.51645	0.103471	0.465818	0.292595	75.2718
1	1005.5	21.7936	4.35882	0.0981513	0.431428	0.295413	82.9209
1	602	15.5299	5.6399	0.0587639	0.331163	0.203645	61.0548
1	798.5	13.0189	5.53612	0.0779451	0.429101	0.240796	66.9975
1	1043.5	9.80508	4.8494	0.101861	0.493553	0.272295	80.1947
1	1264.5	11.3082	4.20663	0.123433	0.518994	0.281346	79.2371
1	818	13.1529	4.87533	0.0798486	0.388044	0.225074	77.5026
1	1012.5	34.9172	5.06546	0.0988346	0.492922	0.28546	64.8916
1	874	13.085	5.39359	0.085315	0.459003	0.254119	72.6239
1	832	13.0397	5.27342	0.0812152	0.425688	0.245314	78.6954
1	910.5	9.8572	5.05589	0.0888779	0.449348	0.247365	84.0282
1	892	8.79724	4.9905	0.087072	0.428404	0.254788	78.5563
1	1188.5	18.5707	4.54979	0.116015	0.519521	0.291871	79.0849
1	757.5	7.37862	4.98734	0.0739429	0.365513	0.22724	75.4013
1	1214	25.0297	4.20025	0.118504	0.497037	0.290298	70.4644
1	1235.5	9.67868	4.08873	0.120603	0.493067	0.290991	80.8437
1	1098	10.1245	5.02601	0.107181	0.511426	0.272644	73.5363
1	1171.5	11.1097	4.52845	0.114355	0.517214	0.284614	81.7303
1	1004	15.2695	4.54284	0.0980049	0.442119	0.269268	71.2402
1	983	14.5402	5.08028	0.095955	0.484612	0.240413	87.4488
1	1024.5	20.017	4.55112	0.100006	0.454725	0.262199	78.707
1	780	5.06568	4.82905	0.0761392	0.365558	0.240131	75.6525
1	911.5	10.1304	4.79752	0.0889755	0.435045	0.280319	73.0962
1	655.5	23.0502	5.64053	0.0639862	0.355745	0.20347	85.6221
1	1019.5	15.2701	4.16866	0.0995179	0.414289	0.267459	64.6957
1	973	11.9141	4.7118	0.0949788	0.447548	0.26182	68.5552
1	1163.5	13.582	4.50815	0.113574	0.508704	0.28158	68.6074
1	690.5	9.85318	5.48125	0.0674027	0.369764	0.21951	80.8577
1	1272.5	35.6129	4.39026	0.124214	0.53947	0.292753	79.6386
1	987	17.045	4.47381	0.0963454	0.426853	0.266859	70.7731
1	1095.5	8.25438	4.42315	0.106937	0.471058	0.290818	68.3464
1	890	13.1985	4.9153	0.0868768	0.426272	0.238902	83.4951
1	957.5	18.6775	4.76044	0.0934658	0.439442	0.239988	86.8192
1	1045	13.4722	5.39143	0.102007	0.547413	0.281032	73.8297
1	770.5	6.3451	5.23425	0.0752119	0.388476	0.214854	80.2802
1	1165	18.0814	4.83676	0.113721	0.549882	0.280658	75.2124
1	1212.5	48.3262	4.08305	0.118357	0.481408	0.289774	63.3244
1	962	17.7981	4.87851	0.0939051	0.457933	0.266198	84.4552
1	1186.5	11.4655	4.2937	0.115819	0.492146	0.294072	75.7141
1	1235	19.7096	4.10591	0.120554	0.492743	0.29767	85.9695
1	962	10.1193	4.65903	0.0939051	0.437881	0.264556	70.4776
1	1185.5	6.44822	4.33164	0.115722	0.4973	0.28192	70.15
1	1100.5	39.0565	4.3276	0.107425	0.457531	0.279238	79.1406
1	982	3.93326	4.36448	0.0958573	0.418281	0.280858	82.0569
1	1080.5	26.1785	4.43274	0.105472	0.465567	0.28675	73.419
1	1183.5	25.3308	4.04704	0.115527	0.466935	0.286089	76.8056
1	1078.5	13.6538	4.35269	0.105277	0.458197	0.28158	66.347
1	1418.5	19.592	3.90049	0.138466	0.538887	0.2964	82.1557
1	1207.5	13.1719	4.21889	0.117869	0.497272	0.271469	88.2308
1	1057	6.12061	4.52169	0.103178	0.463328	0.272629	82.8199
1	1145.5	12.098	4.47407	0.111817	0.49797	0.273244	86.8121
1	840	24.9936	5.51187	0.0819961	0.430994	0.24363	51.472
1	1226.5	14.3571	4.23179	0.119724	0.500652	0.295065	82.7008
1	1055	18.5638	4.42672	0.102983	0.454572	0.295657	79.6877
1	1135.5	10.5017	4.55386	0.110841	0.504783	0.275317	72.3584
1	1046	25.9013	4.47061	0.102105	0.455696	0.2964	69.5248
1	966.5	7.37172	4.56027	0.0943443	0.430523	0.260804	67.4121
1	1170	31.785	4.56586	0.114209	0.517496	0.282527	77.497
1	1222	13.6925	4.48961	0.119285	0.535612	0.285245	77.7464
1	1129.5	12.5822	4.81703	0.110255	0.525648	0.290369	70.6641
1	932	14.2961	5.32407	0.0909766	0.484331	0.28333	84.2957
1	970.5	30.1717	4.87668	0.0947348	0.456483	0.253734	73.7222
1	980	19.7906	5.13209	0.0956621	0.478899	0.269756	71.538
1	1227	15.6742	4.53918	0.119773	0.542824	0.276519	76.9806
1	1253.5	29.1602	4.16168	0.12236	0.508257	0.283126	81.0306
1	1002	30.0241	5.07972	0.0978096	0.493337	0.251017	76.1606
1	782	18.3819	5.90456	0.0763345	0.443294	0.254863	77.4618
1	1089.5	9.8861	4.6788	0.106351	0.497592	0.291043	67.8616
1	885	9.76402	4.6145	0.0863887	0.397294	0.247304	72.9903
1	869.5	13.1471	5.49236	0.0848757	0.443856	0.249924	74.5254
1	1173	10.3944	4.1663	0.114502	0.476131	0.283537	79.2874
1	779.5	11.8785	4.69352	0.0760904	0.356872	0.237851	67.5731
1	944	12.4037	4.84097	0.092148	0.434337	0.252292	73.2045
1	779.5	8.05284	5.35531	0.0760904	0.407022	0.240131	70.6385
1	953	13.2759	5.04195	0.0930265	0.465829	0.255447	86.3084
1	979.5	11.5659	4.82967	0.0956133	0.461459	0.261721	85.2155
1	1110.5	7.44396	4.43563	0.108401	0.47275	0.299231	77.8861
1	879	35.4827	5.04735	0.0858031	0.436472	0.267849	64.2747
1	1228.5	11.4565	4.32867	0.119919	0.511782	0.260106	77.9804
1	1170	23.3569	4.11173	0.114209	0.467077	0.286885	70.8287
1	1182	47.7111	4.64775	0.11538	0.535927	0.293369	82.4709
1	925	22.4592	4.79358	0.0902933	0.429968	0.249176	79.8774
1	1016	12.6654	4.54997	0.0991762	0.451296	0.272165	62.6009
1	859	5.45115	4.91796	0.0838508	0.409852	0.228104	84.0418
1	1029.5	23.0476	4.44718	0.100494	0.446712	0.280016	62.9829
1	985	34.1197	4.96894	0.0961502	0.476734	0.291094	73.2082
1	859	15.6296	5.17468	0.0838508	0.432309	0.228977	76.9234
1	1132	11.1374	4.62254	0.1105	0.507219	0.288564	82.0123
1	1034	24.7343	4.99134	0.100933	0.48432	0.269253	85.3917
1	972	8.41891	4.64912	0.0948812	0.441192	0.262103	76.4515
1	1269	9.40068	4.25458	0.123873	0.517944	0.295454	83.2395
1	728.5	17.4563	5.28267	0.0711121	0.374708	0.221474	84.5104
1	1113	7.38959	4.2589	0.108645	0.462616	0.263331	75.0154
1	1129	16.5976	5.02841	0.110207	0.550972	0.267139	87.7818
1	1067	7.2552	4.59828	0.104155	0.475364	0.282984	65.4929
1	1064.5	21.3356	4.53428	0.103911	0.46862	0.29111	71.7912
1	887	4.61183	4.68627	0.086584	0.403098	0.24206	78.1447
1	886	25.5816	5.61056	0.0864864	0.483633	0.28501	68.4862
1	1292.5	15.2903	4.30947	0.126167	0.528763	0.283224	73.7491
1	1096.5	9.88959	4.42838	0.107034	0.473479	0.277496	77.7203
1	1090.5	19.906	4.34018	0.106449	0.462253	0.279023	61.041
1	763	34.1946	5.92184	0.0744798	0.435591	0.253723	63.3342
1	743.5	6.49025	5.02047	0.0725763	0.362907	0.238124	72.9598
1	1016	6.97063	4.42901	0.0991762	0.43924	0.262185	81.1341
1	926.5	20.2695	4.77064	0.0904397	0.431653	0.235982	82.8856
1	935	29.2875	4.40419	0.0912695	0.401802	0.285515	57.9064
1	1070	11.9607	4.72091	0.104447	0.492727	0.264435	78.7475
1	1270	8.2021	4.02878	0.12397	0.499421	0.299756	81.9721
1	955.5	5.53656	4.85948	0.0932706	0.451772	0.24752	85.4842
1	1271.5	11.2561	4.06519	0.124117	0.504425	0.277337	73.2983
1	1183.5	39.5715	4.33735	0.115527	0.484628	0.29186	70.2549
1	1087	15.2703	4.87248	0.106107	0.51409	0.285571	74.7905
1	1186	21.2904	4.36391	0.115771	0.503191	0.281959	75.1842
1	1066	4.43327	4.14633	0.104057	0.43305	0.289106	74.0433
1	926	7.05318	5.33595	0.0903909	0.476443	0.264254	77.7942
1	1043.5	7.55199	4.35525	0.101861	0.442767	0.2717	68.6687
1	1016.5	5.34375	4.73845	0.099225	0.468492	0.269794	71.3206
1	690	9.71536	5.64902	0.0673539	0.379305	0.223668	80.0473
1	1078	11.912	4.45715	0.105228	0.461807	0.279014	76.4752
1	1123	7.82851	4.17556	0.109621	0.454572	0.289416	88.4886
1	962.5	9.67524	4.50128	0.0939539	0.423769	0.264716	78.4608
1	1040.5	6.62151	5.06102	0.101568	0.510639	0.27828	65.1947
1	1023	20.882	4.93272	0.0998595	0.487476	0.278096	83.2
1	1170.5	13.3733	4.31128	0.114258	0.492265	0.29091	88.7421
1	1228.5	4.20332	4.20579	0.119919	0.502316	0.291825	80.1366
1	1247.5	15.169	4.18349	0.121774	0.507093	0.284347	78.8942
1	1245.5	18.4708	4.31566	0.121579	0.520106	0.287337	89.7671
1	1331	15.4543	3.96433	0.129925	0.514359	0.301908	76.1212
1	988	8.79953	4.8744	0.096443	0.4633	0.267765	78.0362
1	1124	11.6926	4.27527	0.109719	0.466872	0.281214	87.5018
1	1260	31.1353	3.98169	0.122994	0.488036	0.30134	72.9741
1	1045.5	22.1377	4.30287	0.102056	0.435222	0.281945	71.8401
1	1135	14.2336	4.99883	0.110792	0.553496	0.280481	79.9695
1	1245.5	15.1405	4.07692	0.121579	0.494886	0.302917	67.6028
1	1393.5	14.4324	3.89338	0.136026	0.528133	0.297756	82.7719
1	1060.5	12.5203	5.2094	0.10352	0.528321	0.285087	72.2779
1	1122	24.2907	4.05139	0.109523	0.443667	0.291871	73.1911
1	930	38.9243	4.6718	0.0907814	0.419368	0.266541	69.3594
1	1188.5	7.38364	4.22451	0.116015	0.489921	0.278121	70.8926
1	1096	23.5894	4.37072	0.106985	0.466135	0.30408	71.9083
1	969.5	8.8819	4.81116	0.0946372	0.451639	0.247248	85.0534
1	1069	6.06133	4.56541	0.10435	0.471213	0.27919	78.0684
1	1055	27.4679	5.1812	0.102983	0.523813	0.288917	62.2579
1	1194.5	18.0133	4.33407	0.1166	0.499647	0.279894	84.3031
1	815	33.8397	5.44966	0.0795557	0.430327	0.232845	85.9167
1	955	5.72693	4.57576	0.0932218	0.425771	0.245672	86.6036
1	1127.5	38.9391	5.08404	0.11006	0.558065	0.27664	75.7243
1	855	9.4836	5.55994	0.0834603	0.460438	0.252721	67.5711
1	972	15.1223	4.96184	0.0948812	0.465269	0.27373	70.179
1	1026	27.4011	4.41553	0.100152	0.433235	0.271307	61.759
1	1025.5	10.4772	5.00368	0.100104	0.498604	0.27989	83.2226
1	1042	21.4421	4.26676	0.101714	0.434021	0.294512	74.0383
1	897	14.0559	5.32793	0.0875601	0.447663	0.244103	75.3519
1	995	17.7366	4.84375	0.0971263	0.469573	0.273499	84.5751
1	923.5	8.61081	5.034	0.0901469	0.451074	0.254966	74.3805
1	964.5	22.524	4.79853	0.0941491	0.449676	0.267491	68.1077
1	964.5	29.7364	4.63519	0.0941491	0.435914	0.262215	76.6748
1	970	40.7665	4.57823	0.094686	0.434614	0.289112	64.9793
1	1184	50.031	4.29395	0.115575	0.496218	0.299099	64.6559
1	1061	24.1388	4.20112	0.103569	0.433932	0.28004	68.644
1	1152	7.45889	4.1172	0.112452	0.462675	0.278096	82.6048
1	725.5	7.54363	5.10595	0.0708192	0.359963	0.227358	46.0606
1	1191	24.1458	4.29699	0.116259	0.498509	0.276274	82.7115
1	1310.5	39.3217	4.10007	0.127924	0.525063	0.292553	72.5761
1	1023	13.7315	4.55634	0.0998595	0.45299	0.280664	66.2293
1	818.5	11.3733	5.37926	0.0798974	0.429183	0.253268	82.008
1	1157.5	5.12865	4.40371	0.112989	0.494142	0.258284	83.8952
1	835	8.55976	4.90167	0.081508	0.398934	0.23712	79.8737
1	805.5	14.738	5.33975	0.0786284	0.419767	0.229022	82.1486
1	1162	11.8948	4.41577	0.113428	0.492146	0.26182	77.8058
1	1318.5	20.3952	4.05976	0.128705	0.520925	0.298624	85.7968
1	933.5	7.63556	4.68197	0.091123	0.425409	0.28516	55.6056
1	1387.5	22.0219	4.24424	0.13544	0.568664	0.299573	87.0652
1	1158.5	38.5548	4.34936	0.113086	0.491101	0.286154	66.8906
1	865	12.1753	4.96843	0.0844365	0.418811	0.23712	78.9347
1	1111.5	24.2635	4.5176	0.108498	0.487112	0.272095	80.3207
1	1228	45.1203	4.17224	0.11987	0.499155	0.304511	70.2006
1	999.5	7.86436	5.34129	0.0975656	0.52077	0.280035	77.7219
1	990.5	8.29978	5.24722	0.0966871	0.481874	0.26182	71.4194
1	1275.5	18.4289	3.91355	0.124507	0.486435	0.294798	59.7387
1	1357	16.2551	3.98088	0.132463	0.526196	0.294889	75.3375
1	1294.5	15.1214	3.92908	0.126362	0.496234	0.304182	82.2355
1	1056.5	8.93241	4.4953	0.10313	0.45911	0.280427	81.4983
1	1055.5	11.743	4.69585	0.103032	0.483902	0.285988	74.5826
1	1006	30.0334	5.1396	0.0982001	0.499183	0.28652	58.248
1	1110.5	7.19852	4.30819	0.108401	0.466791	0.276728	82.3579
1	850	12.8022	4.76145	0.0829722	0.391468	0.250003	73.3669
1	933	5.20224	4.51202	0.0910742	0.40933	0.25194	62.2911
1	718	6.07933	6.23373	0.0700871	0.419468	0.234408	61.7401
1	924	8.33846	4.93401	0.0901957	0.44505	0.254589	58.1832
1	963	10.3487	5.0901	0.0940027	0.46375	0.281637	82.6301
1	822	28.8013	4.78896	0.080239	0.384337	0.256612	50.9688
1	947.5	14.3539	4.54987	0.0924896	0.42254	0.292324	57.1253
1	1025	15.296	4.22096	0.100055	0.420198	0.28652	73.2483
1	868.5	8.11087	4.53234	0.0847781	0.382025	0.240385	84.1125
1	753.5	6.19624	5.11935	0.0735524	0.372724	0.230865	77.3744
1	1105	11.9451	4.07408	0.107864	0.438921	0.27763	69.4958
1	1213	8.85195	4.0647	0.118406	0.481337	0.28158	64.8507
1	937.5	11.2771	5.30085	0.0915135	0.481865	0.28428	73.3444
1	918	11.5391	5.01763	0.08961	0.449652	0.250802	69.3053
1	1184	15.2248	4.08885	0.115575	0.472758	0.270844	79.2215
1	1003.5	7.32762	4.60245	0.0979561	0.450097	0.250376	75.0153
1	1108	10.1145	4.57444	0.108157	0.488318	0.268467	78.0078
1	712	12.4151	5.83077	0.0695015	0.389398	0.201316	86.4182
1	805.5	6.74015	5.30232	0.0786284	0.414826	0.225735	86.6135
1	760	9.2547	4.69285	0.0741869	0.345127	0.277454	58.8329
1	825	11.5566	5.1901	0.0805319	0.417781	0.260745	72.2312
1	1037.5	12.4708	4.62736	0.101275	0.468232	0.269615	85.8361
1	1366	44.3664	4.12772	0.133341	0.547202	0.293648	69.8113
1	830.5	11.4429	4.94948	0.0810688	0.400564	0.233653	85.9349
1	892.5	5.11342	5.04745	0.0871209	0.433371	0.254683	60.1618
1	774.5	18.3527	6.74835	0.0756024	0.506104	0.262823	80.4961
1	1041.5	8.90351	4.46216	0.101665	0.448134	0.289423	79.3691
1	1093	10.9329	4.53383	0.106693	0.482348	0.275317	83.881
1	949.5	13.0112	4.87029	0.0926849	0.445581	0.263276	83.4461
1	864.5	19.0074	5.62125	0.0843876	0.442201	0.263357	85.0025
1	1227.5	7.96171	4.46523	0.119822	0.527962	0.294839	79.4592
1	1056	16.1943	4.5208	0.103081	0.465715	0.263141	80.5965
1	869.5	8.50253	5.1429	0.0848757	0.436503	0.233023	76.8187
1	1123.5	27.425	4.11814	0.10967	0.452319	0.293504	76.9345
1	1220.5	10.6087	4.27262	0.119138	0.507168	0.290477	83.6478
1	965	15.5849	4.36913	0.0941979	0.411453	0.260517	81.8128
1	1030	32.7106	4.46952	0.100543	0.445695	0.272623	60.5041
1	1020.5	7.68821	4.36038	0.0996155	0.433674	0.273547	68.8449
1	739.5	11.4737	5.33882	0.0721858	0.38516	0.21736	75.9638
1	1136	14.179	4.6933	0.11089	0.517611	0.27987	81.0316
1	1200.5	13.789	4.22475	0.117186	0.494099	0.274519	78.8527
1	871.5	16.2467	4.62129	0.0850709	0.39129	0.247792	67.2106
1	1025.5	26.2226	4.2306	0.100104	0.418929	0.295454	79.8676
1	767	6.6757	5.20293	0.0748702	0.38742	0.220401	83.5987
1	1038	5.69183	4.38017	0.101324	0.443696	0.293829	71.223
1	1354	8.31594	4.20558	0.13217	0.551954	0.28652	84.3512
1	816.5	13.8599	5.23285	0.0797022	0.413577	0.233691	86.217
1	1004	11.5218	4.42043	0.0980049	0.43103	0.273301	82.4645
1	1128	28.7458	4.50374	0.110109	0.496279	0.274066	65.2299
1	715.5	7.06221	5.85055	0.0698431	0.403684	0.239572	75.8769
1	1187.5	14.406	4.31436	0.115917	0.499767	0.280427	81.3409
1	1147	45.3543	4.37912	0.111964	0.482395	0.292616	72.4291
1	1054.5	6.14277	4.39387	0.102934	0.452518	0.293237	72.3241
1	1049	22.6628	4.77653	0.102398	0.477358	0.283694	70.2019
1	808	14.9561	5.07437	0.0788724	0.401009	0.246243	77.8941
1	972	10.6205	4.9122	0.0948812	0.458575	0.270209	79.4009
1	1082.5	12.7184	4.49097	0.105668	0.473882	0.292775	71.3767
1	813.5	8.65396	5.01404	0.0794093	0.396977	0.258902	64.6874
1	1234	11.3652	4.07506	0.120456	0.488961	0.279978	77.6888
1	1330	7.84284	4.08179	0.129827	0.52888	0.28652	85.9846
1	1013	10.9848	4.7623	0.0988834	0.468992	0.264543	74.2774
1	1106	12.1366	4.26036	0.107962	0.458778	0.281958	78.2965
1	1033.5	10.1585	4.13675	0.100884	0.416151	0.280554	81.8306
1	1102.5	19.9029	4.25523	0.10762	0.461485	0.292772	72.8745
1	951.5	7.97106	4.6469	0.0928801	0.431709	0.247103	79.0514
1	833	4.85799	4.80276	0.0813128	0.389382	0.234513	81.7305
1	1044	16.7153	4.47494	0.101909	0.455135	0.278044	80.0524
1	1049.5	10.3336	4.86782	0.102446	0.488929	0.24963	84.1725
1	1127	11.953	4.18868	0.110011	0.46155	0.293504	71.4238
1	823.5	5.64416	4.94328	0.0803855	0.397313	0.230759	63.1596
1	771	21.4879	5.80991	0.0752607	0.436731	0.229022	79.1445
1	477	5.80393	6.96104	0.0465621	0.314378	0.17463	81.2971
1	994.5	12.3489	4.63552	0.0970775	0.445707	0.289972	76.0189
1	1161	22.0723	4.25527	0.11333	0.481584	0.28519	82.8896
1	933	15.9224	4.87837	0.0910742	0.442012	0.260719	64.6849
1	625	24.4463	5.76708	0.061009	0.351498	0.205021	84.4653
1	684.5	5.03573	5.61441	0.0668171	0.375101	0.238275	69.9192
1	896.5	14.12	5.14242	0.0875113	0.441838	0.252457	65.0422
1	1157.5	7.66298	4.3487	0.112989	0.490465	0.287976	83.372
1	1211.5	27.8199	4.27398	0.11826	0.503929	0.280257	75.4426
1	782	6.91159	6.13817	0.0763345	0.463282	0.267931	74.2472
1	1126	30.5699	4.48283	0.109914	0.493751	0.277679	84.5741
1	986.5	8.44108	5.27811	0.0962966	0.50833	0.259657	80.6179
1	1211	13.5771	4.08699	0.118211	0.483109	0.277019	86.1361
1	1130	9.84457	4.38501	0.110304	0.483463	0.27763	72.8074
1	587	16.7198	5.86714	0.0572997	0.337427	0.208176	73.6079
1	1053	6.31882	4.31338	0.102788	0.442917	0.28221	84.6986
1	1026	31.4827	4.56769	0.100152	0.457263	0.270267	71.2887
1	1046.5	26.8132	5.3307	0.102153	0.536129	0.300701	76.1806
1	1156.5	9.64055	4.42172	0.112891	0.491735	0.271314	80.3154
1	833.5	7.63773	4.50356	0.0813616	0.365021	0.266848	77.7913
1	988.5	27.465	4.60243	0.0964918	0.443855	0.270144	82.4358
1	996	17.0241	5.29995	0.0972239	0.513634	0.27598	84.7343
1	1081	8.80538	4.34438	0.105521	0.456597	0.27664	83.1572
1	981.5	6.73409	4.3984	0.0958085	0.419348	0.258868	66.141
1	787.5	6.18053	5.2924	0.0768713	0.399375	0.243533	57.9446
1	878.5	7.64203	4.58432	0.0857543	0.393134	0.273557	69.7853
1	1136.5	26.7755	4.54516	0.110939	0.499637	0.287124	78.2516
1	1066.5	8.02223	4.99387	0.104106	0.519746	0.283128	86.2708
1	970	34.8519	4.88655	0.094686	0.464041	0.271755	68.0896
1	844.5	13.2543	4.82837	0.0824354	0.397967	0.236393	80.2629
1	872	7.65551	4.65494	0.0851198	0.396349	0.239765	82.0524
1	1073	25.8293	4.37099	0.10474	0.457668	0.27484	82.4831
1	838.5	25.3506	5.43738	0.0818497	0.444737	0.247411	75.4518
1	1275.5	9.98015	4.28253	0.124507	0.527887	0.287924	76.2037
1	1038.5	7.97031	4.72278	0.101373	0.469692	0.26264	83.5741
1	990	12.2466	4.93267	0.0966383	0.474017	0.28652	74.2038
1	1028	11.0266	4.36696	0.100348	0.437873	0.293055	74.2753
1	997.5	53.1973	4.16718	0.0973704	0.405201	0.284394	73.1988
1	1181.5	8.51125	4.1634	0.115331	0.476301	0.295379	74.5326
1	1274.5	14.0142	3.89123	0.12441	0.478069	0.287826	84.2394
1	1102.5	6.20825	4.24176	0.10762	0.45566	0.291956	78.3691
1	1035	5.64388	4.6021	0.101031	0.464262	0.251661	86.6507
1	1134.5	11.6198	5.02077	0.110744	0.539744	0.278935	87.2402
1	981	12.697	4.98794	0.0957597	0.477618	0.27828	78.1226
1	1226	16.7654	4.40269	0.119675	0.525926	0.282211	83.8403
1	542	4.37682	5.65403	0.052907	0.296565	0.193095	80.3556
1	931	13.3239	5.326	0.090879	0.46593	0.267233	82.3806
1	889.5	19.0691	4.83381	0.086828	0.416251	0.262683	73.1195
1	1214	9.51276	4.47681	0.118504	0.530259	0.288294	81.8814
1	1017	9.07159	4.40374	0.0992738	0.435292	0.276731	69.8105
1	1011	24.2129	4.24796	0.0986882	0.417519	0.283136	76.4242
1	761.5	7.72062	5.44228	0.0743334	0.404665	0.234506	75.3311
1	891	11.2513	4.6917	0.0869744	0.407939	0.234346	71.2706
1	936.5	9.92361	5.16247	0.0914159	0.470986	0.266198	57.3876
1	761	7.73711	5.19231	0.0742846	0.384569	0.235498	73.2936
1	944	25.5539	4.97508	0.092148	0.458062	0.248571	71.3518
1	901.5	24.2323	4.61707	0.0879994	0.405815	0.237549	62.4697
1	1044	8.96099	4.61254	0.101909	0.469952	0.271535	81.5536
1	1105.5	9.46922	4.50438	0.107913	0.484473	0.277869	83.8584
1	1047	14.5509	4.8972	0.102202	0.50167	0.270361	76.5917
1	976	14.953	4.50399	0.0952717	0.430158	0.272579	69.9834
1	822	8.04974	5.06154	0.080239	0.405209	0.2295	73.6136
1	1236.5	36.937	4.09199	0.1207	0.490927	0.287832	71.6199
1	1068	3.73542	4.42938	0.104252	0.454748	0.27934	71.9575
1	1172.5	20.9152	4.18456	0.114453	0.479391	0.277296	78.104
1	972	8.89815	4.73477	0.0948812	0.443344	0.268544	59.7461
1	1154.5	9.54288	4.89583	0.112696	0.549882	0.295135	74.5078
1	1110.5	6.38722	4.52292	0.108401	0.490302	0.289597	81.3119
1	791.5	5.89524	4.58296	0.0772618	0.354023	0.245809	82.3436
1	974.5	25.6759	4.79802	0.0951252	0.45635	0.27811	62.3502
1	1130.5	24.5439	4.67492	0.110353	0.512093	0.264321	86.5537
1	664.5	16.4308	5.80824	0.0648648	0.375911	0.208096	71.4619
1	839	12.6279	5.35048	0.0818985	0.438253	0.230001	78.4723
1	1135.5	10.3005	4.32259	0.110841	0.470973	0.266867	83.6598
1	1137.5	33.9385	4.71456	0.111036	0.518851	0.285154	62.6362
1	915.5	14.2677	5.18529	0.089366	0.462903	0.274792	61.2152
1	1197.5	9.49752	4.3305	0.116893	0.497398	0.277146	69.989
1	1035	17.2477	4.36578	0.101031	0.440735	0.262861	69.6805
1	1140.5	16.3113	4.36	0.111329	0.481731	0.270674	77.1356
1	1161	17.5265	4.34544	0.11333	0.491671	0.28652	60.0766
1	954.5	7.35998	5.2272	0.0931729	0.480322	0.273211	67.2132
1	1116	11.2097	4.23352	0.108938	0.456943	0.28652	79.3847
1	815.5	13.959	5.14009	0.0796045	0.409148	0.228631	75.3792
1	804	4.46664	5.01289	0.078482	0.393248	0.241908	75.2684
1	1149	23.471	4.14007	0.112159	0.461936	0.2964	82.1068
1	954.5	16.0779	4.36548	0.0931729	0.406644	0.260994	69.287
1	737	7.10812	5.28412	0.0719418	0.380039	0.225359	50.9119
1	1217	5.49988	4.18399	0.118797	0.49597	0.281898	76.972
1	824.5	11.0286	5.49513	0.0804831	0.436048	0.249922	75.3518
1	970.5	17.7978	5.24199	0.0947348	0.486078	0.261273	85.7639
1	1209	13.9965	4.28339	0.118016	0.504895	0.295374	78.4293
1	1110.5	17.6342	4.33319	0.108401	0.468161	0.268271	73.872
1	1142	6.05464	4.0975	0.111476	0.455598	0.28158	68.4238
1	965.5	9.19176	4.90263	0.0942467	0.462035	0.265355	44.1507
1	646.5	7.84139	5.31409	0.0631077	0.333567	0.22312	75.6569
1	1055	25.8299	4.80441	0.102983	0.487719	0.268306	77.0833
1	1146	9.59554	4.38799	0.111866	0.488763	0.28956	79.2799
1	1266.5	12.6737	4.30014	0.123629	0.531837	0.297244	74.9383
1	1218.5	15.1416	4.58773	0.118943	0.527962	0.28792	85.9864
1	1104.5	16.5487	4.44985	0.107815	0.476035	0.276296	84.9929
1	1062	7.94309	4.14617	0.103666	0.430388	0.298641	84.6912
1	1053.5	47.5237	4.96927	0.102837	0.510799	0.279672	81.0107
1	1094.5	7.78059	4.29358	0.106839	0.456771	0.258391	84.2293
1	1037	4.7092	4.58506	0.101226	0.464077	0.291551	68.8263
1	903.5	10.504	4.45552	0.0881946	0.392318	0.262908	85.3518
1	1171	47.8405	4.24172	0.114306	0.47272	0.291537	67.6579
1	1007.5	10.3033	4.88795	0.0983465	0.48065	0.280755	81.8669
1	617.5	7.39304	5.64876	0.0602769	0.336211	0.222819	73.1495
1	1110	10.5036	4.89428	0.108352	0.519784	0.252938	78.6743
1	1049	22.0849	4.27762	0.102398	0.436416	0.257939	64.7414
1	902.5	11.584	4.96448	0.088097	0.436593	0.23676	80.3554
1	1047	7.4638	4.32491	0.102202	0.440204	0.293754	83.2138
1	1071.5	24.6074	4.38173	0.104594	0.457905	0.26676	72.511
1	658.5	8.70063	5.14375	0.0642791	0.329316	0.225341	60.4026
1	1106	22.9904	4.46414	0.107962	0.474343	0.282812	63.5204
1	1390.5	16.6926	3.93813	0.135733	0.534488	0.299335	73.5993
1	731.5	9.88968	5.42172	0.0714049	0.387371	0.226104	86.333
1	641.5	30.0119	5.38465	0.0626196	0.335192	0.212939	69.0899
1	893.5	8.75159	5.56826	0.0872185	0.483109	0.242274	80.075
1	841.5	16.254	5.03756	0.0821425	0.414083	0.24061	78.9302
1	1013	7.59541	4.83012	0.0988834	0.474549	0.277051	74.1912
1	646.5	14.4687	5.54318	0.0631077	0.344781	0.221929	77.967
1	1068	20.1874	4.56163	0.104252	0.474759	0.263323	84.345
1	740.5	18.6918	5.51009	0.0722835	0.398055	0.22862	85.6007
1	1353.5	12.1881	4.23612	0.132121	0.560622	0.296893	77.9616
1	873.5	31.7418	5.7041	0.0852662	0.45488	0.233067	62.9559
1	919	7.74149	4.35011	0.0897076	0.390386	0.289145	64.6088
1	947	33.4387	4.61384	0.0924408	0.42686	0.258391	72.1468
1	1058.5	26.9252	4.51631	0.103325	0.466735	0.284552	74.6272
1	881.5	11.1903	5.35566	0.0860471	0.453718	0.251779	81.6623
1	1230.5	18.0921	4.34429	0.120115	0.521781	0.28158	78.7684
1	884	6.12807	4.92205	0.0862911	0.424562	0.248761	71.5522
1	1177.5	17.2042	4.24459	0.114941	0.487825	0.283728	79.2939
1	1093	25.094	4.31696	0.106693	0.46063	0.276728	79.6896
1	768.5	5.41336	5.66266	0.0750167	0.422924	0.245839	81.8052
1	1134.5	47.3513	4.33925	0.110744	0.478031	0.284008	80.559
1	1195.5	24.5706	4.2026	0.116698	0.490465	0.28158	78.9576
1	971	9.31805	5.69281	0.0947836	0.534103	0.277007	78.5733
1	1216	10.3161	4.24328	0.118699	0.501232	0.282357	80.3314
1	964	8.14767	4.58323	0.0941003	0.430926	0.264586	75.3498
1	871.5	10.67	5.14874	0.0850709	0.435521	0.266052	72.5438
1	1136	12.8549	4.63711	0.11089	0.506219	0.290901	80.6197
1	1114.5	21.4013	4.46626	0.108791	0.485656	0.281945	74.1704
1	1053	11.6044	4.06964	0.102788	0.415403	0.299074	80.3071
1	956	9.43309	4.68957	0.0933194	0.433293	0.286885	61.2356
1	931	13.4723	4.7308	0.090879	0.425742	0.246246	81.792
1	885.5	22.2491	4.93001	0.0864376	0.425061	0.257259	58.6244
1	1281.5	12.9211	4.06963	0.125093	0.508772	0.285197	81.7698
1	925.5	7.02473	4.68033	0.0903421	0.422887	0.25194	67.967
1	883	18.7391	4.82301	0.0861935	0.412826	0.253511	85.6095
1	1104	11.0742	4.37663	0.107766	0.471019	0.272065	83.3352
1	1125	9.45347	4.46875	0.109816	0.490722	0.273744	84.4334
1	1047.5	10.0652	4.84594	0.102251	0.492931	0.269675	87.5359
1	1088	17.7954	4.40005	0.106204	0.462078	0.275294	86.1221
1	1218	14.8724	4.18291	0.118894	0.494247	0.292944	79.6526
1	1154	16.323	4.66462	0.112647	0.508674	0.296995	74.0178
1	1002.5	45.9357	4.68998	0.0978584	0.457716	0.259516	73.1112
1	910	27.8351	5.63374	0.0888291	0.500411	0.27337	86.0103
1	1151	9.14289	4.41373	0.112354	0.495485	0.28158	69.8193
1	1100.5	47.5379	4.46566	0.107425	0.478481	0.287124	60.0258
1	951	15.2752	5.37226	0.0928313	0.478202	0.269186	87.4682
1	1040	13.2139	4.67411	0.101519	0.475599	0.267778	80.1193
1	984	20.9257	5.10031	0.0960526	0.48615	0.265697	86.1136
1	1228.5	6.2152	4.1848	0.119919	0.501622	0.295717	84.3985
1	1313	21.0123	3.95417	0.128168	0.504721	0.29767	59.2859
1	768	15.2508	5.67644	0.0749679	0.417451	0.21867	61.5759
1	1348.5	27.4111	4.02393	0.131633	0.52971	0.295985	75.3062
1	1138	27.8642	4.25981	0.111085	0.474829	0.28508	65.6004
1	1158.5	47.8844	4.42944	0.113086	0.500688	0.290027	58.6972
1	862.5	10.6552	5.36767	0.0841924	0.451649	0.247062	76.5056
1	1095	11.9551	4.92313	0.106888	0.526338	0.28313	87.0753
1	1139	11.9657	4.23323	0.111183	0.466931	0.293916	86.1692
1	1127.5	20.1539	4.37459	0.11006	0.471636	0.288614	69.2907
1	1117	6.18742	4.40357	0.109035	0.479639	0.26676	79.9612
1	765.5	9.47034	5.1347	0.0747238	0.383694	0.226269	76.5187
1	1119.5	18.7369	4.19317	0.109279	0.457287	0.2717	80.5533
1	1049	18.9673	4.87655	0.102398	0.491807	0.271016	84.5213
1	1173	19.9468	4.40217	0.114502	0.503762	0.282984	72.0808
1	1191.5	20.5189	4.87882	0.116308	0.543473	0.287285	78.7603
1	1219.5	8.55556	3.87859	0.119041	0.456085	0.298447	83.4644
1	1155.5	9.17221	4.53051	0.112793	0.497391	0.283118	75.2288
1	664.5	7.51081	5.41321	0.0648648	0.350589	0.203466	76.0253
1	786	13.0001	5.15744	0.0767249	0.394086	0.235096	87.5116
1	1218	13.1344	4.20175	0.118894	0.498233	0.294048	80.2067
1	1041	8.29572	4.64684	0.101617	0.472295	0.285684	83.1824
1	1139.5	27.7833	4.52568	0.111232	0.49083	0.267416	70.1151
1	1022.5	11.5189	4.53432	0.0998107	0.450171	0.264787	72.487
1	833	8.37963	5.36942	0.0813128	0.4211	0.247	84.9845
1	1120.5	9.82602	4.36012	0.109377	0.470987	0.282809	76.3454
1	797.5	10.2442	5.51852	0.0778475	0.416193	0.233863	65.8617
1	827.5	4.97957	4.87057	0.0807759	0.390197	0.23159	66.2244
1	1239.5	12.1207	3.92279	0.120993	0.473299	0.298451	74.0588
1	891	9.79504	5.00031	0.0869744	0.431595	0.247032	81.5944
1	1107	15.9713	4.56549	0.108059	0.487278	0.282671	83.4837
1	999	7.28755	4.97853	0.0975168	0.485587	0.25756	89.0882
1	1079	6.901	4.41419	0.105326	0.466803	0.275388	85.1196
1	1150.5	13.2382	4.13319	0.112305	0.464881	0.290157	70.6984
1	1228	31.5678	4.00521	0.11987	0.479793	0.292595	66.4129
1	983.5	21.9505	5.32586	0.0960038	0.505126	0.278238	80.4572
1	785.5	6.31024	5.17287	0.0766761	0.395809	0.221736	85.6924
1	1014	44.2341	4.57698	0.098981	0.452866	0.266731	76.4155
1	1064.5	10.8276	4.58931	0.103911	0.469915	0.288238	68.9902
1	956.5	13.1022	4.73106	0.0933682	0.441286	0.268215	75.403
1	1122	11.0769	4.75394	0.109523	0.51682	0.285395	76.0251
1	1072.5	6.76891	4.2695	0.104691	0.444239	0.283694	78.2645
1	1004.5	27.7097	4.66946	0.0980537	0.457696	0.267233	82.5312
1	988.5	17.3073	5.19182	0.0964918	0.500177	0.237421	86.6491
1	1339.5	12.9922	4.03565	0.130754	0.527092	0.292478	85.001
1	1177	17.3094	4.18564	0.114892	0.485989	0.310159	83.9956
1	1023	12.6122	4.6686	0.0998595	0.466757	0.275217	72.7044
1	571	31.2915	5.98094	0.0557378	0.333182	0.205198	68.4707
1	1007.5	9.38338	4.79613	0.0983465	0.471591	0.260804	74.8783
1	1138	17.2699	4.55777	0.111085	0.490672	0.295428	65.561
1	725.5	20.2149	5.34256	0.0708192	0.377687	0.223692	84.1204
1	1188.5	37.4101	4.11683	0.116015	0.476915	0.295941	77.6064
1	1175	48.5553	4.44111	0.114697	0.502517	0.281814	69.6649
1	911.5	11.2177	4.98474	0.0889755	0.439018	0.239791	81.9165

## Sheet: phyb_nAT_C
Predicate	Pixel count	SSE	LS Ratio	Surface	Length	Width	Axes angle
1	1105.33	40.7283	4.57983	0.107896	0.489824	0.285194	67.6953
1	646	19.6734	5.52543	0.0630589	0.346044	0.22128	74.5535
1	872	15.6036	5.0043	0.0851198	0.425423	0.263105	78.3434
1	1025.33	13.7982	4.78164	0.100087	0.475508	0.246636	74.9564
1	937.667	21.3788	4.82202	0.0915298	0.439322	0.233728	62.4496
1	951.667	29.7324	4.65425	0.0928964	0.427931	0.242474	69.5671
1	960	36.2467	4.62551	0.0937098	0.429658	0.269664	71.9555
1	1071	20.2957	4.40675	0.104545	0.457988	0.276401	62.6956
1	1086.33	20.543	4.44808	0.106042	0.468227	0.272222	76.9944
1	823.667	23.9124	5.15435	0.0804017	0.412453	0.228618	78.3721
1	1110.33	13.6218	4.28208	0.108385	0.462868	0.272145	69.9113
1	1033.33	23.5627	4.71875	0.100868	0.469007	0.280698	79.9056
1	722	36.2084	5.44454	0.0704776	0.382766	0.216895	78.7522
1	1190	16.9777	4.36398	0.116161	0.505682	0.280196	70.9893
1	969.667	30.7768	4.77364	0.0946534	0.450389	0.277502	77.2427
1	940.667	21.9258	4.74523	0.0918226	0.433444	0.261337	76.7014
1	798.667	12.196	5.3017	0.0779614	0.411888	0.217517	72.1448
1	922.333	21.9488	5.21669	0.090033	0.460861	0.256789	82.3081
1	1000.67	18.287	4.84552	0.0976795	0.469194	0.268554	72.5438
1	509	9.75836	6.38448	0.0496857	0.313196	0.201793	59.0011
1	794.667	15.3795	5.32316	0.0775709	0.411452	0.220305	81.9899
1	983	10.7346	4.47492	0.095955	0.427539	0.262606	78.0032
1	933	10.1093	4.70653	0.0910742	0.422733	0.256766	69.1222
1	871	13.2962	5.14959	0.0850221	0.425329	0.258087	80.0122
1	912.333	43.2255	4.74721	0.0890569	0.420886	0.242181	62.1094
1	973.667	57.4248	4.54776	0.0950439	0.43199	0.26143	63.9869
1	938.667	20.9672	4.96524	0.0916274	0.454979	0.255786	59.8568
1	849.667	14.4648	5.33494	0.0829397	0.430836	0.276226	81.7184
1	1031.67	12.3858	4.53615	0.100706	0.454742	0.261521	70.1822
1	985.333	26.3432	5.02061	0.0961827	0.48208	0.282108	78.0827
1	787.333	18.3988	5.09426	0.0768551	0.391114	0.2463	84.4086
1	940.667	32.9707	4.79513	0.0918226	0.434929	0.276006	78.3078
1	917	19.5934	4.68791	0.0895124	0.419501	0.258094	57.7498
1	886	20.7212	5.4653	0.0864864	0.471983	0.247437	73.3692
1	1000.67	12.8195	4.45806	0.0976795	0.432079	0.264077	77.9581
1	967.667	28.0028	5.04629	0.0944582	0.473936	0.249745	64.0459
1	791	25.7251	4.60611	0.077213	0.354566	0.253605	79.3467
1	966.333	29.051	4.80134	0.094328	0.449309	0.25385	63.4323
1	1065.33	29.3312	4.79535	0.103992	0.498562	0.275683	82.768
1	1017.33	33.9311	5.01766	0.0993064	0.479786	0.27745	74.7722
1	869	9.26263	4.7432	0.0848269	0.40142	0.266957	78.5841
1	824.333	27.947	5.70527	0.0804668	0.457298	0.24192	81.062
1	866	19.1641	5.67888	0.0845341	0.472414	0.240586	86.8657
1	975	17.7819	5.02332	0.095174	0.474557	0.25688	71.3375
1	995.667	23.3423	4.71947	0.0971914	0.457893	0.256121	76.2868
1	923	35.1945	4.92049	0.0900981	0.442027	0.255235	69.6086
1	1053	48.6084	4.76592	0.102788	0.487365	0.270713	66.9179
1	635.333	9.888	5.66396	0.0620177	0.350695	0.199494	79.9714
1	859.667	21.5641	5.29029	0.0839158	0.43915	0.230802	84.2383
1	861.667	35.9648	5.14	0.0841111	0.430226	0.248498	62.858
1	829.667	49.1113	4.93092	0.0809874	0.398036	0.261729	67.0578
1	1049.33	38.1398	4.25838	0.10243	0.432263	0.283835	67.8264
1	967	38.5085	4.7924	0.0943931	0.444845	0.259305	68.9772
1	1102	17.7599	4.32594	0.107571	0.464614	0.288593	81.2239
1	963.667	29.4285	4.54231	0.0940677	0.423151	0.267288	80.1622
1	851.667	27.8026	4.83299	0.0831349	0.401864	0.262333	67.7129
1	918	58.4983	5.00691	0.08961	0.448901	0.252187	54.3725
1	945.667	37.2394	4.58158	0.0923107	0.421863	0.25171	69.8567
1	1005	39.2311	4.87503	0.0981025	0.474063	0.273856	68.6525
1	859.667	38.4724	5.14335	0.0839158	0.431196	0.261352	65.6408
1	869.667	11.7924	4.51987	0.084892	0.383274	0.265382	86.1802
1	996.333	19.6023	4.56603	0.0972565	0.441199	0.249089	67.627
1	614.667	16.1152	6.07538	0.0600003	0.364383	0.212188	59.0118
1	911.333	40.6252	5.13431	0.0889593	0.45499	0.263739	75.2831
1	937.333	30.7004	5.10952	0.0914972	0.461747	0.263669	70.4521
1	888.667	15.1152	4.95841	0.0867467	0.4255	0.252637	73.6104
1	1042.33	23.1582	4.61848	0.101747	0.468902	0.275942	62.1044
1	872	39.8665	5.56479	0.0851198	0.473442	0.257407	65.0743
1	1046.33	34.8422	4.52408	0.102137	0.460339	0.267716	63.2025
1	918	22.5769	4.83014	0.08961	0.431994	0.258534	78.7346
1	620.667	45.8079	5.5185	0.060586	0.320331	0.192719	62.5361
1	827.667	42.1724	4.78345	0.0807922	0.383035	0.241684	72.2267
1	871.333	13.0044	4.98585	0.0850547	0.423454	0.243778	63.8289
1	1078	15.2539	4.61866	0.105228	0.484142	0.255681	80.6492
1	879	40.9736	4.87348	0.0858031	0.414083	0.253529	75.4219
1	830.333	36.7383	5.64845	0.0810525	0.456581	0.257311	65.3198
1	973.667	33.4021	4.84945	0.0950439	0.458568	0.248461	66.9711
1	926.667	27.7483	4.62541	0.090456	0.414566	0.25215	71.8174
1	1024	8.7804	4.64412	0.0999571	0.461874	0.260683	76.3398
1	878.667	24.8965	4.7361	0.0857705	0.403928	0.25815	66.8492
1	901	10.8252	4.53711	0.0879506	0.397678	0.267336	67.0595
1	973	18.235	4.71039	0.0949788	0.4431	0.25211	81.2139
1	826.333	12.8696	5.5564	0.080662	0.444783	0.249975	71.0983
1	1004.33	12.9199	4.58421	0.0980374	0.44749	0.25913	76.5035
1	911	10.7205	4.99912	0.0889267	0.441784	0.249115	73.9882
1	1028	18.8568	4.63719	0.100348	0.462775	0.25911	80.3738
1	819.333	14.7767	4.91335	0.0799787	0.392963	0.25983	76.2556
1	1095.33	29.5099	4.41126	0.10692	0.466178	0.281277	80.6664
1	967.667	16.8387	4.8932	0.0944582	0.458447	0.250537	80.0124
1	983.667	23.7002	4.78373	0.09602	0.451596	0.258664	68.7321
1	1210	15.7727	4.44621	0.118113	0.52292	0.273866	80.9638
1	928	39.3626	4.58673	0.0905862	0.415054	0.248247	60.382
1	933.333	36.4045	4.73099	0.0911068	0.428483	0.260697	67.9434
1	821.667	21.2116	5.20371	0.0802065	0.410236	0.244913	67.3102
1	1052.67	43.0421	4.65512	0.102755	0.477289	0.271792	78.4923
1	1125.67	39.2645	4.55114	0.109881	0.497806	0.262995	68.6214
1	859.667	48.5277	5.17684	0.0839158	0.433569	0.250795	74.2931
1	965.333	46.7161	4.98362	0.0942304	0.468852	0.251593	68.1293
1	970.667	47.8666	4.67595	0.094751	0.441143	0.260924	80.0065
1	932.667	18.358	5.0941	0.0910417	0.461476	0.243981	78.4091
1	973.667	24.2622	4.58378	0.0950439	0.434734	0.267173	58.5711
1	1010	13.8079	4.80508	0.0985905	0.47079	0.262952	75.9623
1	927.333	47.0621	4.93143	0.0905211	0.441897	0.259978	85.4906
1	916.333	30.3265	5.0334	0.0894473	0.445254	0.263485	76.9097
1	1071	21.9444	4.75504	0.104545	0.49347	0.279583	71.4146
1	1095.67	47.3835	4.3545	0.106953	0.463165	0.283014	55.034
1	851.667	22.6847	5.07475	0.0831349	0.424533	0.260587	64.7239
1	927.667	23.7146	5.17763	0.0905536	0.463788	0.245573	65.1396
1	1030	24.6127	4.49145	0.100543	0.447545	0.27016	78.6925
1	891.333	27.2016	4.98704	0.087007	0.431913	0.271164	62.0967
1	927	26.1208	5.12943	0.0904885	0.463175	0.263897	60.0578
1	1030.33	17.8835	4.79573	0.100575	0.480048	0.259702	66.1871
1	882.667	17.5491	4.9616	0.086161	0.426122	0.245802	78.1519
1	925	19.7521	5.10353	0.0902933	0.460778	0.271049	70.1318
1	804.667	9.67025	5.42654	0.0785471	0.423454	0.223633	76.2435
1	956	28.0932	4.81388	0.0933194	0.448647	0.250766	81.0856
1	931.667	17.8435	4.90967	0.0909441	0.445246	0.253818	80.5517
1	903.667	25.137	5.0688	0.0882109	0.446186	0.247539	77.3899
1	963	26.0684	4.91072	0.0940027	0.460615	0.257571	78.5449
1	996	17.7903	4.75756	0.0972239	0.459721	0.257877	86.0454
1	1021	18.3019	4.49588	0.0996643	0.447067	0.267916	75.6071
1	820.333	12.7295	5.14458	0.0800763	0.41328	0.255952	77.4387
1	842.667	12.0762	5.23245	0.0822564	0.4283	0.244754	85.1144
1	1002.33	29.3891	4.70242	0.0978422	0.457143	0.269812	68.4169
1	1007	39.0081	4.50254	0.0982977	0.440923	0.271839	58.8204
1	924.333	14.4241	4.66953	0.0902282	0.421613	0.265011	82.497
1	764	16.572	5.56537	0.0745774	0.412145	0.21712	85.2909
1	1026.67	19.0572	5.01585	0.100217	0.497526	0.240492	74.1947
1	1009	25.0332	4.78546	0.0984929	0.467343	0.251205	78.2239
1	990	29.0944	4.72082	0.0966383	0.455229	0.265874	74.0647
1	814	22.8264	5.00645	0.0794581	0.397632	0.250049	73.0486
1	887	12.9622	5.0944	0.086584	0.44096	0.251102	78.6908
1	869.667	35.977	4.83414	0.084892	0.408499	0.261865	59.73
1	997.333	27.1968	4.44598	0.0973541	0.432789	0.280978	75.1474
1	918	32.3862	4.97088	0.08961	0.444281	0.253957	79.652
1	942	21.3629	4.88328	0.0919528	0.443281	0.26676	68.6089
1	938.333	14.0115	4.83635	0.0915948	0.441959	0.249319	83.4969
1	743.667	40.3045	5.64555	0.0725926	0.408781	0.23897	74.1217
1	981.333	23.0405	4.6224	0.0957923	0.441584	0.268312	70.3369
1	948.667	32.6534	4.52798	0.0926035	0.419086	0.267288	54.9493
1	909.667	24.9659	4.89866	0.0887966	0.434523	0.248936	73.0993
1	900.333	28.5373	5.22526	0.0878855	0.458459	0.257616	76.9161
1	668.667	21.6785	5.83378	0.0652715	0.381592	0.212178	75.6592
1	865.333	18.6794	4.84655	0.084469	0.408733	0.250322	73.2775
1	1005.67	37.2741	4.60772	0.0981675	0.450075	0.270052	56.5956
1	996	22.9958	4.76406	0.0972239	0.462493	0.274425	71.6044
1	820.333	30.0625	5.42563	0.0800763	0.433958	0.225084	66.5653
1	912	42.3102	4.54156	0.0890243	0.401366	0.26593	63.2606
1	878.333	18.737	4.90034	0.085738	0.419991	0.264292	59.3696
1	862	34.8312	5.1623	0.0841436	0.432829	0.253355	84.2116
1	845.667	38.8374	4.7504	0.0825492	0.391776	0.253795	74.0424
1	920.333	23.042	4.9623	0.0898378	0.444067	0.258006	79.0235
1	1014	43.3614	4.69738	0.098981	0.46195	0.281878	79.6371
1	1021.33	11.4179	4.86379	0.0996968	0.481781	0.2736	70.7031
1	938.667	24.7097	4.69001	0.0916274	0.426683	0.259555	84.1144
1	715.333	25.8574	5.4766	0.0698268	0.383678	0.231192	69.1223
1	983.667	23.8732	4.67601	0.09602	0.446328	0.263589	79.0518
1	1109	23.4459	4.25324	0.108254	0.458818	0.267107	69.5357
1	881	13.4111	4.94498	0.0859983	0.423944	0.240859	76.1279
1	1071.67	17.7876	4.66929	0.10461	0.485616	0.26676	82.0074
1	864.333	37.3143	4.99342	0.0843714	0.420293	0.247668	71.4993
1	695	18.1524	5.18063	0.067842	0.351693	0.247961	68.3545
1	970.667	23.6778	4.88652	0.094751	0.460498	0.244094	73.578
1	759	13.1232	5.24115	0.0740893	0.388725	0.248367	54.2897
1	1048.33	20.7332	4.52404	0.102332	0.461048	0.263769	75.4647
1	893.333	19.9367	4.77428	0.0872022	0.414713	0.270422	71.8628
1	947.333	45.4606	4.84738	0.0924734	0.444617	0.244632	64.6165
1	956.333	30.7262	4.71471	0.0933519	0.438239	0.247385	77.0949
1	973.667	10.9282	4.64739	0.0950439	0.43963	0.264142	70.7266
1	853.667	15.9638	5.01413	0.0833302	0.414947	0.230331	61.1017
1	997	9.79907	4.63836	0.0973216	0.451219	0.246402	83.265
1	888.667	21.1264	4.97479	0.0867467	0.429145	0.245792	79.3576
1	906	25.4289	4.76356	0.0884386	0.420724	0.254557	70.2535
1	914	39.3231	5.01098	0.0892196	0.444578	0.253091	75.4999
1	926	12.3322	5.09552	0.0903909	0.460628	0.251734	82.2245
1	1170.67	14.6673	4.21151	0.114274	0.479091	0.290599	83.3412
1	917.333	48.957	4.93184	0.0895449	0.439541	0.250354	77.4254
1	1096.33	23.9858	4.51223	0.107018	0.481633	0.263054	82.825
1	686.333	27.669	5.89127	0.066996	0.394366	0.184878	61.5532
1	930	13.0695	5.01116	0.0907814	0.453878	0.271022	73.7241
1	982.667	14.415	4.92628	0.0959224	0.471551	0.252255	76.6878
1	940.333	29.8915	4.58515	0.0917901	0.420212	0.257493	67.6901
1	964.333	38.304	5.14963	0.0941328	0.477252	0.257133	81.84
1	959.667	21.6179	4.76349	0.0936773	0.445254	0.235313	80.9799
1	831	42.1955	5.17294	0.0811176	0.418916	0.254083	78.8867
1	921	13.4035	5.0831	0.0899029	0.456176	0.245057	75.9954
1	1219.67	19.6298	4.4599	0.119057	0.52942	0.292036	83.0254
1	948	12.0075	4.89421	0.0925385	0.45023	0.257359	77.1275
1	1104.33	22.5091	4.49313	0.107799	0.482766	0.277332	81.7636
1	1004	13.3529	4.64859	0.0980049	0.45218	0.272779	67.1594
1	1041	17.5537	4.38013	0.101617	0.443597	0.271144	74.6719
1	966	20.5023	4.71083	0.0942955	0.443521	0.249612	77.7217
1	944.667	21.1364	4.77787	0.0922131	0.438774	0.246756	77.0512
1	983.667	27.0144	5.12501	0.09602	0.48784	0.258144	83.8356
1	1121	30.7813	4.25082	0.109426	0.463179	0.295459	81.3705
1	1105.33	24.2602	4.18326	0.107896	0.450128	0.261946	76.131
1	865.333	34.3826	5.18921	0.084469	0.436497	0.255687	76.4886
1	932.333	21.6691	4.93809	0.0910092	0.447584	0.263137	60.1175
1	1111	23.8809	4.4591	0.10845	0.47933	0.277742	73.1609
1	693.333	26.8629	5.56267	0.0676793	0.374787	0.197455	75.301
1	1052.67	15.1711	4.80705	0.102755	0.48639	0.263693	84.6081
1	833.667	46.5414	5.31086	0.0813779	0.430923	0.221256	69.1994
1	841.667	23.8622	5.59929	0.0821588	0.462258	0.255199	77.8708
1	981.333	15.3413	4.90684	0.0957923	0.469265	0.249061	83.2581
1	882	18.0817	5.42044	0.0860959	0.463889	0.228122	70.6014
1	919.333	40.7233	5.19844	0.0897402	0.464188	0.266644	78.4772
1	866	10.5742	4.84663	0.0845341	0.407551	0.245963	82.4709
1	771.333	13.3503	5.50473	0.0752932	0.416688	0.235113	85.8583
1	857.333	15.5522	4.99151	0.0836881	0.416743	0.278371	68.4156
1	1018.67	21.2747	4.96701	0.0994365	0.492255	0.268365	79.9714
1	904.667	14.7082	4.86457	0.0883085	0.426097	0.246041	79.8122
1	1005.33	26.0781	4.59279	0.098135	0.447992	0.253688	77.5507
1	770.333	26.0348	4.89023	0.0751956	0.367954	0.284444	59.2003
1	973.333	15.328	4.77697	0.0950113	0.452285	0.253445	73.1866
1	871.333	43.0372	4.99734	0.0850547	0.424964	0.252015	70.155
1	1099.67	40.7862	4.72957	0.107343	0.5054	0.269127	70.562
1	1086	30.2255	4.74138	0.106009	0.498684	0.268108	78.2782
1	1073.67	58.4824	4.85223	0.104805	0.507748	0.253822	72.1548
1	873.333	19.8999	5.33551	0.0852499	0.450149	0.246331	78.7763
1	807.667	17.2271	4.75517	0.0788399	0.372673	0.253616	67.748
1	856.333	10.7209	5.03399	0.0835905	0.418439	0.257545	80.4371
1	928	15.9553	4.96992	0.0905862	0.44924	0.256851	77.4286
1	970.333	19.2278	4.97449	0.0947185	0.469782	0.25661	62.3551
1	1008.67	52.6093	4.91041	0.0984604	0.479822	0.266152	79.4095
1	861.667	28.6459	4.88208	0.0841111	0.412191	0.263241	62.3075
1	1086.67	26.5243	4.45282	0.106074	0.47035	0.286398	78.106
1	817.667	25.2747	4.91916	0.079816	0.392148	0.248401	74.2009
1	946.667	26.1044	4.91439	0.0924083	0.452193	0.256459	70.4495
1	898.667	9.26318	4.72745	0.0877228	0.409031	0.251604	62.2761
1	1016.33	23.5359	4.81423	0.0992088	0.476831	0.264793	61.0742
1	1028	58.0386	4.52925	0.100348	0.44541	0.295982	68.158
1	980.667	14.8058	4.75122	0.0957272	0.451353	0.275147	79.1727
1	863.667	15.3535	5.04031	0.0843063	0.426177	0.245408	82.6156
1	951	24.1407	5.2527	0.0928313	0.47714	0.241158	83.98
1	957.667	13.7746	5.52992	0.0934821	0.514453	0.258019	67.5474
1	711	36.5976	5.60991	0.0694038	0.389003	0.207983	52.8249
1	995	13.0483	4.74125	0.0971263	0.458506	0.259037	78.2995
1	1010.33	41.8946	4.7769	0.0986231	0.470791	0.252183	78.5036
1	1068.67	29.9882	4.42178	0.104317	0.460379	0.262456	69.0364
1	884.333	22.0621	4.91885	0.0863237	0.424678	0.252624	70.0163
1	861	9.85913	4.71284	0.084046	0.394805	0.25255	73.6238
1	898.333	11.1095	4.86073	0.0876903	0.425032	0.270053	79.1847
1	990	41.8085	4.56817	0.0966383	0.440639	0.26901	80.4269
1	981	13.2961	4.81206	0.0957597	0.458177	0.25545	75.6082
1	965	33.3906	4.83121	0.0941979	0.45468	0.277677	80.8769
1	1008.67	12.9011	4.60597	0.0984604	0.450475	0.267918	74.3596
1	972.667	27.6154	4.6969	0.0949463	0.444762	0.261464	62.5726
1	839.667	17.9639	5.11827	0.0819636	0.419225	0.233005	73.5816
1	865.667	40.0025	4.60065	0.0845015	0.387697	0.282835	73.0279
1	857.333	21.9365	5.04759	0.0836881	0.421651	0.252447	81.2612
1	913	10.9826	4.97159	0.0891219	0.440811	0.269619	71.9913
1	1089	55.2218	5.24454	0.106302	0.555926	0.27581	85.7681
1	888.333	41.165	4.82049	0.0867141	0.41527	0.252828	66.7416
1	866	13.4525	5.30279	0.0845341	0.435232	0.278863	70.2338
1	814.333	25.1309	4.71567	0.0794907	0.375308	0.254834	76.3585
1	925.667	11.1768	5.15465	0.0903584	0.467612	0.250113	76.6401
1	887	41.7024	5.48679	0.086584	0.474099	0.245857	63.6273
1	878.333	15.708	4.96199	0.085738	0.424403	0.246242	78.2292
1	778.667	9.62526	5.56575	0.0760091	0.422164	0.234294	68.4021
1	970.667	34.0943	5.0115	0.094751	0.472425	0.277442	65.3873
1	1029.67	20.2882	4.62681	0.10051	0.464036	0.255079	70.1472
1	1003	24.4301	4.7412	0.0979072	0.462159	0.259362	69.8061
1	990	58.0831	4.72666	0.0966383	0.454904	0.269672	67.395
1	978.333	35.0526	5.00452	0.0954994	0.476696	0.258376	75.1825
1	941.667	24.2796	4.63424	0.0919202	0.424225	0.269807	62.17
1	994	13.0513	4.78358	0.0970287	0.460674	0.268127	83.992
1	709.667	16.1561	5.22213	0.0692737	0.359415	0.241293	70.1347
1	1024.67	17.2563	4.84466	0.100022	0.480324	0.269059	80.4236
1	895.667	8.19474	4.68994	0.08743	0.409194	0.259869	82.859
1	819.667	20.7534	5.23533	0.0800113	0.41558	0.250537	79.2158
1	754.667	30.0059	5.03046	0.0736663	0.371619	0.248894	80.7742
1	1041.67	15.2042	4.44723	0.101682	0.452258	0.264398	62.8013
1	1080.33	38.0126	4.46881	0.105456	0.470315	0.28191	66.0838
1	973	31.0842	4.53365	0.0949788	0.428017	0.256779	64.1221
1	1087.67	12.294	4.59991	0.106172	0.486401	0.268759	81.1843
1	863	32.5488	5.35095	0.0842412	0.437201	0.256019	71.6713
1	1002.67	18.3698	4.77997	0.0978747	0.465373	0.259049	77.3681
1	970.333	13.6707	4.92481	0.0947185	0.460864	0.2619	80.0145
1	1204.67	39.6576	4.43392	0.117593	0.519429	0.29066	77.3655
1	1256.67	20.6443	4.7015	0.122669	0.572287	0.280597	70.6431
1	945	59.9977	4.7592	0.0922456	0.438713	0.279814	68.8707
1	962.333	15.3483	5.09836	0.0939376	0.475432	0.257179	82.7691
1	905.667	18.397	4.66689	0.0884061	0.409758	0.2547	82.0753
1	745.667	12.2536	5.42369	0.0727878	0.390941	0.224236	66.5936
1	844.333	12.6147	5.02842	0.0824191	0.413371	0.245663	80.5548
1	940	19.9541	4.63546	0.0917575	0.424075	0.273059	68.0736
1	873.667	36.2237	5.25144	0.0852824	0.447932	0.24957	58.851
1	789	13.4395	4.65671	0.0770178	0.357872	0.256478	53.8841
1	924	66.4959	4.59458	0.0901957	0.412446	0.276728	67.54
1	1150.67	19.6486	4.55004	0.112322	0.510568	0.272064	86.0213
1	951	34.2314	4.99348	0.0928313	0.462028	0.244599	83.0564
1	945	21.0049	5.30662	0.0922456	0.488316	0.249223	78.2741
1	980.667	53.0261	4.7446	0.0957272	0.452301	0.273859	58.2672
1	1012	9.30067	4.81394	0.0987858	0.471869	0.260131	71.2165
1	920.667	22.3072	4.82483	0.0898703	0.432257	0.275724	62.2396
1	1040.33	17.3111	4.34359	0.101552	0.440115	0.277521	71.8816
1	1013.33	36.6604	4.80951	0.0989159	0.473272	0.258346	72.0111
1	1011.67	20.5614	4.64033	0.0987532	0.456004	0.260647	73.6378
1	1055.33	22.3069	4.53168	0.103016	0.46624	0.269126	84.4808
1	877.333	12.209	4.85653	0.0856404	0.412635	0.242017	70.6406
1	883.667	13.3458	4.5536	0.0862586	0.392292	0.290901	79.1982
1	867.333	17.2178	5.1125	0.0846642	0.431581	0.259333	72.7686
1	923	55.1453	5.05851	0.0900981	0.453617	0.251327	58.9644
1	947.333	32.5	4.91627	0.0924734	0.450155	0.256343	78.5788
1	1145.67	28.3435	4.48284	0.111834	0.497636	0.270581	66.2019
1	932.333	23.57	4.75682	0.0910092	0.430211	0.238919	79.5534
1	947	11.7901	4.57718	0.0924408	0.418135	0.277363	80.2591
1	873.333	33.519	5.40684	0.0852499	0.461725	0.258706	74.5572
1	821.667	30.1356	4.95933	0.0802065	0.396788	0.255368	81.5469
1	947	21.0053	4.36814	0.0924408	0.403813	0.283288	56.5179
1	1016.67	28.3381	4.9299	0.0992413	0.48795	0.239163	73.8298
1	916.667	38.2038	4.85661	0.0894799	0.43092	0.260631	69.3392
1	850	24.9866	5.31715	0.0829722	0.439954	0.251496	71.7506
1	843.667	14.0956	5.31778	0.082354	0.435894	0.230933	81.8548
1	840.333	38.0603	5.25466	0.0820286	0.430356	0.226444	67.1603
1	803.667	8.96879	5.14823	0.0784494	0.401814	0.264609	70.8506
1	855.333	8.87052	5.36012	0.0834929	0.442499	0.257428	82.1694
1	942	34.5529	4.86918	0.0919528	0.44276	0.260682	75.7516
1	935	11.6101	5.33981	0.0912695	0.484827	0.263405	84.5087
1	941	30.4955	4.86266	0.0918552	0.446168	0.256941	75.3956
1	717.667	31.0941	5.50137	0.0700546	0.385706	0.239332	65.7253
1	898	18.9193	4.79766	0.0876577	0.418683	0.238509	77.9901
1	896.667	38.3378	4.83949	0.0875276	0.422758	0.257943	67.9262
1	961	28.7348	5.01174	0.0938074	0.467756	0.254376	71.1917
1	986.333	21.7789	4.75832	0.0962803	0.454487	0.257973	72.4975
1	1012.67	15.6419	4.55219	0.0988509	0.446676	0.27235	80.9035
1	717.667	11.0963	5.54928	0.0700546	0.389519	0.244675	81.3645
1	797.667	37.3015	5.24372	0.0778638	0.407135	0.258405	69.524
1	1080.33	12.8811	4.61268	0.105456	0.48527	0.278315	76.9455
1	600	12.757	5.84265	0.0585686	0.342552	0.218136	69.2403
1	1010.67	19.1162	4.44365	0.0986556	0.435791	0.260919	78.3072
1	855.333	22.6862	4.86735	0.0834929	0.405787	0.241928	61.5431
1	754	9.73804	5.8961	0.0736013	0.435145	0.228428	71.7391
1	913.667	29.9963	5.20781	0.089187	0.461353	0.262505	75.886
1	948.333	28.8044	4.8784	0.092571	0.445176	0.239875	72.4484
1	858.333	24.5681	4.81728	0.0837857	0.40306	0.265494	52.2438
1	802	14.7168	5.17221	0.0782867	0.401016	0.243051	71.0128
1	947.667	22.0516	5.0478	0.0925059	0.466682	0.251222	64.8149
1	950.333	17.147	4.72875	0.0927662	0.437993	0.257828	62.5589
1	931.667	39.3922	4.8372	0.0909441	0.43844	0.269098	58.3648
1	894	23.0389	4.93733	0.0872673	0.430308	0.25064	67.4992
1	991.667	18.025	4.61288	0.0968009	0.444648	0.262151	65.6397
1	814	29.3684	4.92605	0.0794581	0.38916	0.21438	75.1784
1	992	17.8001	4.88719	0.0968335	0.470422	0.244005	77.6558
1	1023	15.4952	4.61597	0.0998595	0.459163	0.268451	80.1562
1	743	35.719	5.76983	0.0725275	0.4183	0.228372	76.2852
1	800.333	43.7954	5.14771	0.0781241	0.399531	0.239939	76.9568
1	1025.33	12.9935	4.59337	0.100087	0.457742	0.260664	76.181
1	977.667	13.8491	5.01263	0.0954343	0.476616	0.250645	80.2584
1	910.333	11.4695	5.10504	0.0888616	0.449683	0.26431	71.1493
1	716	9.77796	5.53986	0.0698919	0.384131	0.23414	71.9302
1	945	14.9743	4.88673	0.0922456	0.446182	0.253822	77.9444
1	955.333	10.2798	4.61547	0.0932543	0.425508	0.271302	72.7984
1	952.333	15.7992	4.95807	0.0929614	0.457715	0.24397	68.4203
1	853.667	18.4688	5.56773	0.0833302	0.458807	0.271797	79.7099
1	959.667	14.2388	4.87055	0.0936773	0.455465	0.255829	78.4104
1	1076.67	34.8452	4.39022	0.105098	0.461709	0.28186	73.5565
1	866.667	14.4523	4.96587	0.0845991	0.420976	0.258445	76.1987
1	979	15.625	4.72539	0.0955645	0.450314	0.265025	79.9301
1	986	26.862	4.63312	0.0962478	0.443872	0.260047	75.3296
1	945.667	26.4627	4.92809	0.0923107	0.447217	0.264449	75.7347
1	949	8.90035	4.54763	0.0926361	0.420034	0.270053	64.0529
1	1026.67	18.8187	4.79271	0.100217	0.479607	0.254518	78.5041
1	978	37.4695	5.14629	0.0954669	0.489283	0.268577	74.8664
1	946	11.8417	4.54796	0.0923432	0.418893	0.270153	76.1335
1	958	26.8826	4.72893	0.0935146	0.440906	0.26032	83.9808
1	978	14.7964	4.4506	0.0954669	0.424749	0.269865	62.2302
1	884.333	42.0513	4.7584	0.0863237	0.409483	0.259929	70.0142
1	874.333	18.9653	4.78775	0.0853475	0.408987	0.286101	86.7433
1	807.667	8.38922	5.13122	0.0788399	0.407514	0.24609	76.4814
1	913.333	19.6331	4.94387	0.0891545	0.435132	0.264314	56.621
1	946	13.8949	4.75647	0.0923432	0.436826	0.250542	82.3288
1	947.333	37.3548	4.99967	0.0924734	0.460088	0.269191	69.2006
1	1069.67	17.6024	4.41801	0.104415	0.459849	0.260903	80.8562
1	816.333	18.1431	5.96988	0.0796859	0.472659	0.242339	79.5446
1	1031.67	27.5902	4.89228	0.100706	0.487744	0.243707	79.777
1	910.333	12.1677	5.0152	0.0888616	0.439115	0.261804	77.9743
1	976.667	26.3959	4.69832	0.0953367	0.445447	0.271555	71.0941
1	855.333	12.0214	4.93128	0.0834929	0.410344	0.244157	66.4131
1	1047.67	16.2648	4.57727	0.102267	0.463378	0.273402	74.8642
1	1084.67	10.1363	4.30982	0.105879	0.453553	0.282972	73.6899
1	922	31.6007	5.1697	0.0900005	0.454029	0.277913	68.0103
1	976	25.5099	4.72516	0.0952717	0.444424	0.266755	82.6373
1	958.667	43.8283	4.78535	0.0935797	0.447524	0.270203	72.4628
1	778.333	39.9995	6.49737	0.0759765	0.48119	0.239232	76.9508
1	707.667	25.0285	6.02751	0.0690785	0.407519	0.264131	74.9687
1	704.667	8.33514	5.4553	0.0687856	0.376323	0.223395	84.1679
1	853.667	12.9256	4.92283	0.0833302	0.407949	0.269525	85.3139
1	923.333	23.6785	4.88168	0.0901306	0.439777	0.267494	68.6338
1	700	21.6696	5.62315	0.0683301	0.384039	0.228979	80.7366
1	846.667	18.2675	5.52398	0.0826469	0.454302	0.251613	76.9493
1	987.333	44.3157	5.1482	0.096378	0.49549	0.250962	68.7543
1	1016.33	21.4405	4.95503	0.0992088	0.4791	0.257477	78.8307
1	774.667	45.7516	5.15281	0.0756186	0.387294	0.233131	66.3058
1	915	27.8175	4.5346	0.0893172	0.402314	0.255408	78.5444
1	934	32.3673	4.76451	0.0911718	0.428001	0.261596	76.2361
1	999.333	15.2918	4.77205	0.0975493	0.462323	0.264271	76.889
1	880.667	30.2049	5.16973	0.0859658	0.443469	0.248639	70.6081
1	894.667	13.4823	4.90266	0.0873324	0.427014	0.265482	63.2667
1	967.667	11.2235	4.8578	0.0944582	0.45536	0.24366	79.8765
1	907	11.2539	5.21717	0.0885363	0.45974	0.249978	71.9551
1	819.667	11.4054	4.90814	0.0800113	0.392428	0.237325	71.8797
1	1030.33	37.7937	4.6858	0.100575	0.467968	0.265669	83.7914
1	823.333	20.4138	5.17447	0.0803692	0.41486	0.244362	79.7825
1	969.333	21.8232	5.02695	0.0946209	0.474135	0.246979	74.4039
1	886.333	31.8792	5.07161	0.0865189	0.438183	0.241151	75.0252
1	1033.33	24.801	4.89139	0.100868	0.491906	0.28215	72.8686
1	802.667	11.077	5.13251	0.0783518	0.401627	0.257574	66.9585
1	852.333	39.5252	5.2341	0.0832	0.433401	0.249736	71.9133
1	887.333	11.3145	4.97548	0.0866165	0.428859	0.259904	77.1444
1	966	23.974	4.69917	0.0942955	0.441512	0.271045	69.1982
1	782.333	41.849	5.26236	0.076367	0.399821	0.257906	74.8737
1	1097.33	16.8572	4.34584	0.107116	0.46008	0.284497	70.8339
1	870	20.4673	5.08666	0.0849245	0.430464	0.246718	57.2919
1	947	19.9686	4.80174	0.0924408	0.443372	0.255539	80.1581
1	1025	18.3234	4.70978	0.100055	0.467235	0.291641	78.519
1	959	22.3002	4.86461	0.0936122	0.441608	0.264023	78.9139
1	901.333	26.0631	5.18922	0.0879831	0.455558	0.265215	83.2381
1	1039.33	35.792	4.47482	0.101454	0.45163	0.263965	80.8446
1	1038	24.1063	4.74698	0.101324	0.479629	0.260974	84.238
1	982.667	33.2768	4.56944	0.0959224	0.438045	0.264121	69.9272
1	791.333	9.41022	4.95581	0.0772455	0.384491	0.25935	78.6073
1	1000.67	12.6325	5.25619	0.0976795	0.509014	0.275124	72.1987
1	903.667	26.2869	5.09722	0.0882109	0.448335	0.260775	71.5899
1	867.333	34.199	4.87374	0.0846642	0.412115	0.260371	77.5487
1	876.667	16.8827	5.10185	0.0855753	0.433723	0.264818	87.0829
1	839.667	24.703	5.12117	0.0819636	0.415934	0.270108	85.1688
1	948	21.9584	4.82116	0.0925385	0.445408	0.265082	72.2874
1	1035	20.5469	4.69467	0.101031	0.472883	0.271967	82.6318
1	997.667	15.3072	4.54094	0.0973866	0.441096	0.26082	83.6683
1	820	24.9613	4.99355	0.0800438	0.399875	0.265382	76.8347
1	863.667	15.6303	5.08694	0.0843063	0.425787	0.256636	63.383
1	836	17.4251	5.04342	0.0816056	0.408737	0.247268	69.5363
1	762.333	17.5965	5.38337	0.0744147	0.401109	0.23183	72.1521
1	847.333	31.0057	4.80341	0.0827119	0.397548	0.259597	78.0652
1	848.333	21.7561	5.12447	0.0828095	0.423767	0.248428	65.7129
1	961.667	25.6941	5.07619	0.0938725	0.475319	0.242657	81.3167
1	935	19.898	4.50737	0.0912695	0.41244	0.274554	57.3723
1	905.333	8.56724	4.89192	0.0883736	0.424737	0.241913	69.9808
1	889	11.3062	5.16548	0.0867792	0.445953	0.25605	75.608
1	904	20.795	4.8861	0.0882434	0.429299	0.254124	73.7752
1	844.667	14.117	5.32818	0.0824516	0.439131	0.253922	77.8853
1	862	13.8265	4.96015	0.0841436	0.416692	0.247354	79.4103
1	844.333	25.6071	4.86065	0.0824191	0.400985	0.251521	72.9894
1	954.667	18.9059	4.65247	0.0931892	0.430736	0.267879	66.7831
1	902	16.563	4.64749	0.0880482	0.408129	0.256995	72.2616
1	1009	21.1851	4.87993	0.0984929	0.47932	0.247982	75.3148
1	837.333	23.6876	5.09535	0.0817358	0.41602	0.238846	81.3751
1	984.667	16.7925	4.4851	0.0961176	0.429055	0.265984	84.7732
1	1036	33.3079	4.4445	0.101129	0.448824	0.271033	66.8196
1	839	12.7268	4.97399	0.0818985	0.405251	0.22221	69.8547
1	916	28.1094	5.37069	0.0894148	0.479193	0.242906	83.3215
1	959	28.7278	4.95693	0.0936122	0.462267	0.253317	79.0604
1	836.667	21.5327	5.02413	0.0816707	0.405189	0.257417	59.3122
1	902	46.4617	5.29373	0.0880482	0.462609	0.256505	65.6509
1	935	30.6379	5.06799	0.0912695	0.461792	0.263973	79.1335
1	1101.33	18.6527	4.76203	0.107506	0.510707	0.255413	81.3812
1	731	23.3631	5.75553	0.0713561	0.410346	0.231315	66.4666
1	787	38.1796	5.52916	0.0768225	0.422344	0.227642	75.3473
1	902	14.1694	5.40655	0.0880482	0.474925	0.256325	83.5578
1	732	28.7829	5.54707	0.0714537	0.396039	0.23801	65.613
1	931	20.3408	5.28597	0.090879	0.479708	0.256458	85.0513
1	954	16.6783	4.70365	0.0931241	0.435831	0.251275	76.819
1	962	9.54522	4.90051	0.0939051	0.458488	0.264927	81.3021
1	954.333	43.6968	4.76758	0.0931567	0.444151	0.256869	65.5756
1	909.667	13.96	4.92771	0.0887966	0.435247	0.260781	81.6511
1	989	28.4028	4.5079	0.0965406	0.433154	0.263467	82.0326
1	920	14.2155	4.55478	0.0898053	0.407704	0.260983	78.6645
1	939.333	21.3719	4.62041	0.0916925	0.421482	0.266604	62.244
1	1002.33	27.4913	4.72472	0.0978422	0.460863	0.27028	67.3658
1	821.333	12.202	4.9723	0.080174	0.39687	0.248185	74.4572
1	1043.33	16.7701	4.70676	0.101844	0.478411	0.260861	79.0123
1	974	16.8039	4.85598	0.0950764	0.459167	0.234489	79.0685
1	788.333	25.756	5.60852	0.0769527	0.431149	0.234809	82.5294
1	931.667	10.5356	4.34727	0.0909441	0.393567	0.276158	66.2291
1	810	12.379	5.09859	0.0790677	0.402285	0.257304	83.7973
1	967.667	23.2382	4.40098	0.0944582	0.415474	0.267808	55.8181
1	791.667	12.6768	5.21139	0.0772781	0.405041	0.2413	66.1578
1	872.333	12.6439	5.32738	0.0851523	0.447075	0.244329	79.3912
1	843	10.7292	5.17122	0.0822889	0.423615	0.223947	84.2097
1	821.667	13.6923	4.93057	0.0802065	0.39708	0.250182	77.4263
1	1004.33	10.167	4.83793	0.0980374	0.472347	0.262525	63.4444
1	854.667	21.5035	5.4778	0.0834278	0.458481	0.242785	80.9316
1	900.667	20.3222	5.12893	0.087918	0.450252	0.24914	73.8625
1	794.667	27.4975	5.5223	0.0775709	0.420748	0.256972	70.8287
1	825.333	18.5523	5.21486	0.0805644	0.41843	0.217398	69.5697
1	1040.33	39.129	4.97491	0.101552	0.499592	0.267807	80.096
1	934	17.5135	4.60415	0.0911719	0.418762	0.25688	82.2452
1	1042.67	18.6758	4.65614	0.101779	0.473496	0.267439	78.7147
1	995.333	16.4526	4.44943	0.0971589	0.432461	0.284355	81.566
1	986	38.4229	4.72951	0.0962478	0.45341	0.256249	75.039
1	844	28.4946	5.36851	0.0823866	0.43885	0.219581	71.242
1	899	35.2876	4.69996	0.0877553	0.410024	0.267555	67.5026
1	994.667	13.4014	4.59267	0.0970938	0.445634	0.257488	84.5241
1	971	10.4114	4.9136	0.0947836	0.464236	0.266293	79.1682
1	1225.33	28.6251	4.37705	0.11961	0.519825	0.273722	78.5627
1	947.333	9.69541	5.07376	0.0924734	0.468371	0.271485	83.4233
1	983	30.0281	4.59047	0.095955	0.440324	0.280366	68.9282
1	878	25.6416	5.14834	0.0857054	0.441065	0.270486	62.7564
1	964.333	35.4178	5.16079	0.0941328	0.482095	0.261418	73.801
1	1030.67	15.3937	4.34845	0.100608	0.435466	0.258526	80.0504
1	1023.33	57.9335	4.59067	0.0998921	0.455287	0.255711	63.8064
1	870.667	20.6366	5.21075	0.0849896	0.442836	0.256377	71.5184
1	786.667	12.3985	5.09161	0.07679	0.389278	0.258784	74.0437
1	867	11.8371	4.78047	0.0846317	0.406716	0.271658	85.0636
1	867.667	18.2545	4.68614	0.0846968	0.395078	0.27314	78.8091
1	908.333	24.6361	4.79162	0.0886664	0.422396	0.25991	80.2851
1	850	13.362	5.75351	0.0829722	0.472157	0.253333	78.9889
1	965.333	18.16	4.83276	0.0942304	0.452526	0.246826	82.1932
1	853.333	10.23	5.044	0.0832976	0.418171	0.225947	75.9366
1	958.667	14.2687	4.89158	0.0935797	0.456997	0.270384	81.8439
1	833.333	13.2099	5.09767	0.0813453	0.413418	0.24731	76.2214
1	814.667	24.7217	5.04726	0.0795232	0.399773	0.266289	75.0383
1	1007.33	31.2122	4.79236	0.0983302	0.464681	0.260746	77.7074
1	1172	11.2644	4.35775	0.114404	0.497422	0.276436	68.194
1	722.333	26.6955	5.21422	0.0705101	0.369608	0.240676	69.6656
1	719.667	13.542	5.5976	0.0702498	0.392347	0.238154	74.754
1	934.667	40.8905	4.60859	0.0912369	0.418424	0.282641	60.3341
1	952	18.0496	4.66461	0.0929289	0.427811	0.282484	65.3953
1	781	18.2316	5.23198	0.0762368	0.397998	0.216106	79.7265
1	1076.33	17.9164	4.89616	0.105066	0.512151	0.281794	72.5061
1	952.667	20.331	4.88734	0.092994	0.449191	0.265008	80.8311
1	1003	19.4724	4.90307	0.0979072	0.479018	0.238505	75.3372
1	616.667	12.7422	5.80518	0.0601955	0.351473	0.226575	78.3003
1	859	39.8032	4.88659	0.0838508	0.40737	0.239632	79.8898
1	783.333	15.6059	4.91182	0.0764646	0.375871	0.266714	60.041
1	947.667	13.3396	4.49146	0.0925059	0.413713	0.26676	73.1207
1	830	11.2579	5.32565	0.08102	0.429948	0.231724	83.2655
1	897	18.8943	5.18224	0.0875601	0.448989	0.248936	78.7774
1	839.333	14.3847	5.21014	0.081931	0.423785	0.239757	78.3103
1	979.333	14.0634	4.74761	0.095597	0.451088	0.265707	78.4888
1	921.667	15.6487	4.86075	0.0899679	0.435817	0.269865	60.0733
1	855.333	24.1913	5.23968	0.0834929	0.436973	0.251248	78.5093
1	820	17.016	5.03061	0.0800438	0.40165	0.256151	76.437
1	914	47.2227	5.33286	0.0892196	0.47526	0.260455	76.8919
1	1001.33	28.7155	4.68606	0.0977446	0.455557	0.266516	76.3851
1	915.667	19.3782	5.19758	0.0893823	0.464264	0.25431	76.8768
1	1001.33	33.1291	4.52605	0.0977446	0.440824	0.278718	82.0922
1	1052.67	32.2105	4.52018	0.102755	0.462726	0.259611	70.0809
1	932.333	13.5672	4.80415	0.0910092	0.42883	0.271652	80.7643
1	921	28.6911	4.57254	0.0899029	0.407849	0.258442	79.306
1	985.333	21.949	4.59248	0.0961827	0.438469	0.262236	77.2119
1	933	22.2948	4.68261	0.0910742	0.424459	0.263752	62.0602
1	846	33.3812	4.8853	0.0825818	0.395945	0.283979	65.0594
1	998	11.3263	4.81809	0.0974192	0.463478	0.255877	67.6836
1	987	18.991	4.71921	0.0963454	0.45562	0.270292	84.8992
1	979	10.235	5.03636	0.0955645	0.4752	0.255754	81.5701
1	809.667	26.0891	5.26221	0.0790351	0.414561	0.253992	80.0629
1	719.333	19.8173	5.34718	0.0702173	0.376066	0.243734	83.9986
1	975	16.0532	4.89839	0.095174	0.46617	0.275021	78.7081
1	1009.67	38.8314	4.68307	0.098558	0.46113	0.272147	68.0819
1	1007.67	13.3692	4.52419	0.0983628	0.441729	0.277387	79.489
1	958.333	30.0579	5.00705	0.0935471	0.468166	0.263185	70.1219
1	826.667	20.5689	4.97401	0.0806946	0.401872	0.263912	65.8832
1	859.667	19.263	5.09067	0.0839158	0.424367	0.26367	70.514
1	838	28.823	5.15685	0.0818009	0.421547	0.241024	65.7177
1	867	15.3942	4.48253	0.0846317	0.37587	0.277651	60.4863
1	1226.67	28.2439	4.4318	0.11974	0.528255	0.284869	62.0711
1	883.667	43.2748	4.91195	0.0862586	0.421781	0.25565	77.6366
1	757	9.89077	5.14112	0.0738941	0.378559	0.230076	70.5827
1	723	19.505	5.29441	0.0705752	0.373364	0.244983	65.0626
1	1024.67	27.3483	4.81432	0.100022	0.478847	0.28068	65.6822
1	866.667	48.257	5.4075	0.0845991	0.455411	0.254585	71.3199
1	912	20.5875	4.64838	0.0890243	0.411736	0.25385	61.8356
1	1032.33	19.3145	4.51707	0.100771	0.454248	0.263763	71.7994
1	897	19.0037	4.93146	0.0875601	0.425726	0.256358	74.4204
1	939	22.2574	4.98073	0.0916599	0.456223	0.253909	75.4529
1	934.333	21.476	4.98501	0.0912044	0.453038	0.272611	82.982
1	904.333	13.6775	4.85263	0.088276	0.424728	0.255351	75.8481
1	1078.67	46.4247	4.11472	0.105293	0.432996	0.292067	76.5515
1	866	29.366	4.84165	0.0845341	0.407835	0.262102	78.8632
1	821	28.9105	5.15309	0.0801414	0.411963	0.253827	74.2467
1	1068.33	20.9588	4.67646	0.104285	0.48477	0.270958	74.623
1	977.333	45.2182	4.7397	0.0954018	0.449893	0.271351	68.4275
1	797	11.9126	5.20557	0.0777987	0.401716	0.258463	75.2046
1	992.333	29.536	4.79953	0.096866	0.462107	0.262889	81.768
1	933.667	23.4269	5.12144	0.0911393	0.465755	0.258519	73.233
1	953	52.2386	4.78057	0.0930265	0.443847	0.260729	54.5776
1	763.333	31.5819	5.23561	0.0745123	0.392603	0.253087	58.6682
1	1036	31.0574	4.512	0.101129	0.454754	0.256833	67.969
1	868.667	25.6198	4.76542	0.0847944	0.404031	0.282195	78.4796
1	959.667	10.8393	4.98744	0.0936773	0.457624	0.265636	70.0372
1	896.667	18.1693	5.09435	0.0875276	0.445729	0.254049	73.0123
1	804	25.9104	5.82542	0.078482	0.448616	0.244907	61.1737
1	844.667	44.3001	5.07376	0.0824516	0.415431	0.248306	65.6341
1	975.333	10.0348	4.58136	0.0952066	0.43318	0.257875	74.5548
1	896.333	21.0173	4.99077	0.087495	0.435976	0.270806	69.416
1	884	14.5898	4.92329	0.0862911	0.424309	0.25004	70.5811
1	1006.67	24.1918	4.31208	0.0982652	0.421455	0.268844	77.9201
1	902.667	42.2382	5.18925	0.0881133	0.456438	0.273459	62.3189
1	843.667	13.5229	5.15357	0.082354	0.420892	0.233165	87.2521
1	970.667	19.7992	4.49214	0.094751	0.424825	0.274504	60.7209
1	914.667	17.5264	4.64291	0.0892846	0.413437	0.256942	75.8452
1	1049.33	25.7191	4.56561	0.10243	0.46527	0.26826	76.8317
1	936	23.4327	4.39187	0.0913671	0.396589	0.27841	65.0713
1	976.333	33.3636	5.10117	0.0953042	0.483724	0.237188	78.7768
1	868	23.1817	5.25488	0.0847293	0.447977	0.25612	62.7749
1	785.667	20.6717	5.35575	0.0766924	0.409022	0.214423	70.7599
1	1092	17.1656	4.57736	0.106595	0.486514	0.275769	68.6289
1	1115	14.5744	4.44434	0.10884	0.480398	0.27391	66.6347
1	765.667	13.4745	5.07006	0.0747401	0.379717	0.244918	75.8622
1	1030.67	33.7953	4.61524	0.100608	0.458137	0.269013	63.3522
1	783.333	34.4475	5.39766	0.0764646	0.41223	0.236593	65.2246
1	1016	22.7957	4.90269	0.0991762	0.477449	0.257897	68.9949
1	859	35.218	5.45734	0.0838508	0.455955	0.247364	70.6824
1	972	20.3933	4.89551	0.0948812	0.46433	0.252422	85.2133
1	911.333	15.3192	4.89051	0.0889593	0.435237	0.251981	68.4996
1	818	18.1898	5.27697	0.0798486	0.41895	0.24921	79.0661
1	1090	18.9871	4.29778	0.1064	0.456787	0.306764	84.1727
1	952	17.4939	4.5682	0.0929289	0.424926	0.28791	74.4034
1	791.667	23.0138	5.65206	0.0772781	0.429703	0.252329	68.5976
1	860.667	9.72199	4.91456	0.0840135	0.412047	0.257458	77.2717
1	918.333	54.5502	5.35468	0.0896426	0.48051	0.258834	76.019
1	865.333	14.6378	4.94553	0.084469	0.416566	0.260585	81.956
1	982	26.6002	5.10046	0.0958573	0.472775	0.277276	63.8897
1	983	14.4771	4.72368	0.095955	0.452686	0.265373	81.4741
1	918.667	31.6116	5.05351	0.0896751	0.448088	0.27642	84.8821
1	825.667	22.6866	4.97191	0.080597	0.399939	0.258926	80.5425
1	958.667	22.5053	4.8467	0.0935797	0.452765	0.256787	75.2377
1	887.333	10.9409	5.07376	0.0866165	0.435468	0.252558	63.1615
1	768.333	19.8429	5.33326	0.0750004	0.403355	0.239625	74.1792
1	673.333	26.9681	5.31492	0.065727	0.349744	0.24688	78.8618
1	994.667	14.29	4.67215	0.0970938	0.451817	0.256479	77.0427
1	867.667	37.5665	5.47845	0.0846968	0.461817	0.241143	72.3127
1	907.667	10.7788	4.90211	0.0886013	0.430735	0.255868	81.9171
1	773	46.4155	5.31512	0.0754559	0.399514	0.243183	80.6884
1	896.667	25.1576	5.00883	0.0875276	0.433935	0.259868	71.6866
1	911	27.5743	4.64382	0.0889267	0.411227	0.263083	76.8068
1	825.333	39.4732	5.04181	0.0805644	0.408478	0.247637	65.1572
1	776.667	20.6108	4.91638	0.0758139	0.372671	0.257984	70.5022
1	721	20.1968	5.76267	0.07038	0.405845	0.247335	75.8191
1	829.667	18.7452	5.07422	0.0809874	0.410722	0.256792	67.6663
1	723.667	21.4921	5.57651	0.0706403	0.39831	0.230737	86.8686
1	639	15.1042	5.70819	0.0623756	0.357817	0.243921	54.0374
1	901.667	11.8032	4.94398	0.0880157	0.428462	0.256278	70.8774
1	864.333	17.5168	4.93248	0.0843714	0.413921	0.255229	73.6657
1	733	19.1392	5.33194	0.0715514	0.382449	0.226495	77.4805
1	999.667	17.1967	4.70523	0.0975819	0.457655	0.266202	71.825
1	950	12.3476	4.81235	0.0927337	0.445813	0.257997	80.9817
1	819	17.4252	5.71987	0.0799462	0.455578	0.256398	63.9131
1	957.333	18.1174	4.74259	0.0934495	0.440812	0.255103	81.822
1	1162	17.6706	4.6868	0.113428	0.529599	0.273105	73.9622
1	1167.67	29.3304	4.43474	0.113981	0.503857	0.272855	64.5692
1	899.667	21.6305	4.91227	0.0878204	0.430383	0.270316	81.5417
1	787.667	19.9039	5.23324	0.0768876	0.401092	0.252299	69.0528
1	981.667	22.6213	4.64471	0.0958248	0.444209	0.251301	56.4546
1	920.333	22.5356	4.90256	0.0898378	0.437756	0.249787	76.5054
1	813.667	35.0783	5.12623	0.0794256	0.408436	0.259642	72.9793
1	902	39.4067	5.08788	0.0880482	0.443636	0.259323	64.357
1	706.667	57.2735	5.9458	0.0689808	0.410642	0.24802	71.704
1	906.333	28.2111	4.95587	0.0884712	0.436238	0.234874	70.6575
1	849.333	23.8934	5.23062	0.0829072	0.431835	0.255093	66.1656
1	722.667	36.3758	5.17759	0.0705427	0.365349	0.247229	63.3407
1	848	25.227	4.99918	0.082777	0.415104	0.282301	61.9013
[truncated: 346 more rows]

## Sheet: phyb_nAT_D
Predicate	Pixel count	SSE	LS Ratio	Surface	Length	Width	Axes angle
[truncated: 1,000 more rows]

[truncated: 11 more sheets: pif4_nAT_A, pif4_nAT_B, pif4_nAT_C, pif4_nAT_D, pifq_nAT_A, pifq_nAT_B, pifq_nAT_C, 35s PIF4_nAT_A, 35s PIF4_nAT_B, 35s PIF4_nAT_C, 35s PIF4_nAT_D]
