# Supplementary material for: Integrative phenotyping analyses reveal the relevance of the phyB-PIF4 pathway in Arabidopsis thaliana reproductive organs at high ambient temperature
Source: BMC Plant Biol. 2024 Jul 29;24:721. doi: 10.1186/s12870-024-05394-w (PMC11285529; doi:10.1186/s12870-024-05394-w)
Supplement: Supplementary file 11 — Additional File 3: Table S9 [file 12870_2024_5394_MOESM11_ESM.xlsx]

## Sheet: Col_hAT_A
Predicate	Pixel count	SSE	LS Ratio	Surface	Length	Width	Axes angle
1	1046	52.2546	4.61742	0.102105	0.471694	0.295549	65.0918
1	733.5	49.3067	5.59309	0.0716002	0.403401	0.248351	71.6332
1	1119.5	66.1235	4.50712	0.109279	0.492655	0.298165	74.7763
1	684	13.0863	6.13088	0.0667682	0.411255	0.209713	73.0951
1	1237.5	21.3005	4.05349	0.120798	0.485718	0.287423	74.6982
1	1113.5	53.7264	4.60283	0.108694	0.50037	0.28506	77.0617
1	870	18.5677	4.76011	0.0849245	0.405566	0.258624	64.2102
1	936.5	37.2643	4.50845	0.0914159	0.407216	0.289444	47.4902
1	1104	22.3596	4.63669	0.107766	0.499718	0.269063	88.2713
1	1232.5	36.9235	3.9284	0.12031	0.47514	0.351898	56.376
1	749	38.9541	5.78672	0.0731132	0.414149	0.242283	52.1849
1	836	12.4257	4.98299	0.0816056	0.410443	0.26748	88.1325
1	1049	39.9809	4.62149	0.102398	0.472438	0.262823	81.4486
1	1074	49.6014	4.43076	0.104838	0.464503	0.289759	65.7785
1	1032.5	71.1316	4.96309	0.100787	0.499029	0.22602	67.0439
1	1045.5	13.0656	4.42395	0.102056	0.451332	0.264152	63.9624
1	857	49.338	5.04953	0.0836555	0.422408	0.254523	59.8056
1	1104	13.6249	4.85697	0.107766	0.523404	0.267849	78.1375
1	1057.5	26.0538	4.67097	0.103227	0.481731	0.237219	64.786
1	1172.5	41.3063	4.06953	0.114453	0.465788	0.31312	71.6217
1	1113	21.2695	4.84837	0.108645	0.526726	0.275257	86.1057
1	1160	26.4096	4.42966	0.113233	0.50461	0.301253	67.1684
1	1052	29.4355	4.38556	0.10269	0.448697	0.281214	78.1351
1	1038	77.6285	5.08067	0.101324	0.515498	0.255486	74.0824
1	844	22.9203	5.55978	0.0823866	0.455242	0.250436	76.5187
1	769	23.0716	5.11935	0.0750655	0.3829	0.224154	58.1999
1	1050	47.8909	4.57094	0.102495	0.468575	0.272551	78.3462
1	1264.5	34.1255	4.18536	0.123433	0.515117	0.307816	85.3922
1	1060	21.1532	4.2521	0.103471	0.439963	0.306437	71.4891
1	1186.5	40.9365	4.70282	0.115819	0.543081	0.27752	63.8068
1	990.5	32.5181	4.64648	0.0966871	0.448238	0.272625	71.6667
1	1484	22.0531	3.88314	0.14486	0.562107	0.29093	73.3399
1	980	45.983	4.769	0.0956621	0.45137	0.247801	74.0487
1	1131.5	17.5956	4.54621	0.110451	0.499982	0.280465	81.216
1	1286.5	13.367	3.9809	0.125581	0.499111	0.313629	84.028
1	832.5	24.2086	5.1985	0.081264	0.422913	0.256246	69.5676
1	898	61.0232	4.96703	0.0876577	0.434884	0.257817	86.1612
1	1473.5	13.8164	4.31399	0.143835	0.613803	0.281756	86.2543
1	1067	22.0101	4.64177	0.104155	0.482855	0.26182	77.6337
1	1268	23.1389	4.5807	0.123775	0.551566	0.270624	85.4081
1	1046.5	20.0181	4.60702	0.102153	0.453694	0.275243	72.1765
1	1123	33.4108	4.61193	0.109621	0.499393	0.285016	65.3867
1	962	23.5188	5.02859	0.0939051	0.472356	0.254408	84.7369
1	903.5	48.2955	4.83155	0.0881946	0.427763	0.264846	70.0356
1	1247	66.0705	4.04053	0.121725	0.490435	0.299458	79.79
1	1405.5	26.2963	4.23652	0.137197	0.576864	0.283366	78.1263
1	874	22.1429	4.9765	0.085315	0.424181	0.250563	72.9607
1	1079	21.5638	4.33317	0.105326	0.456277	0.276154	80.4902
1	1129.5	46.9837	4.04069	0.110255	0.446866	0.313091	77.3269
1	1207.5	34.5108	4.31571	0.117869	0.508997	0.290071	76.8527
1	917	6.88382	4.76452	0.0895124	0.425467	0.269206	67.3104
1	1001	30.3153	4.6638	0.097712	0.451438	0.27909	65.9438
1	1046.5	34.0154	4.45897	0.102153	0.455499	0.305532	78.9725
1	1348	50.8704	4.13543	0.131584	0.532595	0.316069	71.5297
1	987.5	28.8551	4.90417	0.0963942	0.4776	0.279866	66.9964
1	1441.5	54.8554	3.85301	0.140711	0.537673	0.318186	73.8058
1	1174	26.4817	4.09802	0.114599	0.469567	0.285892	77.0358
1	1174.5	19.4698	4.27231	0.114648	0.491441	0.295841	72.8542
1	1021.5	57.4655	4.17988	0.0997131	0.416798	0.3221	33.3167
1	1114.5	42.5928	4.26557	0.108791	0.462939	0.282083	74.2328
1	1101	31.4021	4.42156	0.107473	0.470636	0.280465	59.5922
1	1338.5	35.4691	4.34462	0.130657	0.561616	0.274228	79.3252
1	1074	43.0767	5.02621	0.104838	0.527485	0.300625	86.0859
1	1118.5	61.7415	4.59597	0.109182	0.503672	0.261207	85.1617
1	1039.5	49.0552	5.49564	0.10147	0.560974	0.250569	84.5855
1	1082.5	28.7345	4.29204	0.105668	0.453454	0.266585	78.3564
1	1180.5	25.4338	4.47497	0.115234	0.507089	0.293082	83.235
1	1268.5	38.9025	4.09942	0.123824	0.507546	0.29146	70.1387
1	936	65.032	4.13879	0.0913671	0.378576	0.309373	42.7864
1	1194.5	28.3306	4.37142	0.1166	0.508647	0.275542	84.3811
1	1315.5	53.8675	4.06368	0.128412	0.521915	0.28125	78.9049
1	1254	28.8581	3.86046	0.122408	0.47143	0.32043	81.1303
1	1315	36.2348	4.23119	0.128363	0.541263	0.310507	71.2226
1	1007.5	22.862	4.57688	0.0983465	0.444746	0.292137	73.8481
1	1305.5	19.947	4.05289	0.127436	0.516504	0.305781	85.6868
1	1368	59.0488	3.99271	0.133536	0.532959	0.289894	78.4852
1	888.5	25.3429	4.47319	0.0867304	0.388152	0.279632	82.5597
1	1207.5	51.3188	4.44864	0.117869	0.523816	0.28652	68.7819
1	1248	48.8358	4.49703	0.121823	0.528046	0.272447	58.272
1	1580	58.8504	3.94867	0.154231	0.606755	0.319332	83.5728
1	1091.5	15.4324	4.57254	0.106546	0.482848	0.266472	76.818
1	1070.5	43.9387	4.70603	0.104496	0.478979	0.300587	47.8061
1	1349	20.4679	4.22475	0.131682	0.551919	0.280336	81.7767
1	1274.5	38.3313	4.07813	0.12441	0.498518	0.330657	79.6295
1	886	20.1631	4.54522	0.0864864	0.387005	0.277353	69.3195
1	940	36.1198	5.00364	0.0917575	0.457342	0.264173	58.5222
1	1299.5	40.5061	4.00174	0.12685	0.507664	0.302326	79.1491
1	1554	83.1729	3.66598	0.151693	0.552228	0.345134	81.837
1	1171.5	58.3189	4.10903	0.114355	0.469217	0.281214	54.5499
1	1443.5	22.9267	3.9667	0.140906	0.55942	0.344921	71.1118
1	931	51.6878	5.01884	0.090879	0.445834	0.251243	68.3967
1	1012.5	31.1125	5.15057	0.0988346	0.504369	0.250626	75.5603
1	1155	48.2652	4.08569	0.112745	0.460481	0.290818	55.0781
1	1136	35.2835	4.74719	0.11089	0.514079	0.277016	68.4353
1	1422	60.7064	4.16117	0.138808	0.576512	0.302093	76.6133
1	1262.5	24.3369	4.33943	0.123238	0.534655	0.284149	72.6225
1	1178	39.5407	4.35049	0.11499	0.501185	0.283136	66.1374
1	1159	68.6988	4.39271	0.113135	0.497098	0.296328	60.3825
1	1000	29.186	4.61977	0.0976144	0.448685	0.278949	76.9167
1	1234	22.2887	4.59033	0.120456	0.545927	0.291171	81.0238
1	1002	43.3789	4.32911	0.0978096	0.417397	0.266681	75.4728
1	838	10.1854	5.37088	0.0818009	0.438529	0.248798	80.0382
1	987.5	52.7644	4.42327	0.0963942	0.423222	0.286382	45.5025
1	1151.5	26.0369	4.41883	0.112403	0.494236	0.280073	80.8755
1	1405	30.0912	3.96509	0.137148	0.542148	0.311145	85.3396
1	1242	24.4425	4.12316	0.121237	0.499944	0.27698	66.4042
1	1087	22.6856	4.43462	0.106107	0.476617	0.301917	51.7665
1	1139.5	21.5526	4.2831	0.111232	0.475403	0.281819	74.7615
1	975.5	45.1213	5.45035	0.0952228	0.501109	0.270445	37.8921
1	1086	34.1277	4.88727	0.106009	0.517771	0.284275	84.0159
1	1292.5	32.8163	4.32974	0.126167	0.544938	0.285194	85.428
1	1449	60.1532	4.06853	0.141443	0.574118	0.291674	83.7945
1	808	51.3354	5.36676	0.0788724	0.424532	0.228649	82.2549
1	1051.5	47.5049	4.37301	0.102642	0.441252	0.278155	85.8281
1	1291	32.4989	4.10418	0.12602	0.511393	0.298618	83.2554
1	1638	33.605	3.89	0.159892	0.617327	0.326595	88.7375
1	1089.5	32.9453	4.51027	0.106351	0.473081	0.287999	62.7868
1	191	11.5481	14.8178	0.0186444	0.269687	0.093033	77.0984
1	1191	54.2633	4.1239	0.116259	0.47878	0.296301	67.4328
1	1117	26.2121	4.66357	0.109035	0.508608	0.292736	72.2406
1	863	17.4042	5.14201	0.0842412	0.433476	0.25681	54.8393
1	1079.5	15.8508	4.48322	0.105375	0.470001	0.303964	72.1745
1	1238.5	22.9522	4.17709	0.120895	0.50304	0.303008	65.0368
1	936	26.755	4.70397	0.0913671	0.429052	0.261454	65.1162
1	1132.5	29.1211	4.25471	0.110548	0.470268	0.302138	78.7284
1	1048.5	9.95074	4.58827	0.102349	0.468578	0.268581	81.2538
1	1197.5	27.5792	4.54005	0.116893	0.530739	0.277952	71.2668
1	1095	29.7602	4.44697	0.106888	0.470005	0.303586	81.7719
1	1089	43.4513	4.67947	0.106302	0.501942	0.287394	44.4222
1	1219.5	24.4389	3.95586	0.119041	0.472297	0.323107	80.4206
1	1243.5	23.3865	3.98351	0.121384	0.48404	0.306256	84.9069
1	1330.5	66.6188	4.68177	0.129876	0.577176	0.25895	84.2454
1	960.5	30.5908	4.75116	0.0937586	0.432418	0.278541	59.1946
1	947	58.8643	4.77895	0.0924408	0.444967	0.262565	67.6396
1	1340.5	29.5763	4.69855	0.130852	0.614868	0.280481	80.4148
1	1043.5	64.7869	4.33958	0.101861	0.444044	0.280986	49.7085
1	840	25.863	5.23095	0.0819961	0.433215	0.260994	57.9548
1	703	41.4485	5.93838	0.0686229	0.407509	0.202638	76.2149
1	736	37.0488	5.34265	0.0718442	0.387618	0.23336	67.0264
1	1223	25.3712	4.28251	0.119382	0.509762	0.273362	70.7717
1	904.5	31.7225	4.53331	0.0882922	0.400356	0.259243	78.8956
1	1037	23.3836	4.06653	0.101226	0.412938	0.318626	58.3261
1	1005.5	62.2584	4.6537	0.0981513	0.436055	0.280157	34.1881
1	752	22.8735	5.24139	0.073406	0.382133	0.250718	51.5115
1	1113.5	40.6062	4.23103	0.108694	0.454596	0.302892	69.4726
1	1011	34.3136	4.48469	0.0986882	0.442322	0.267147	82.3989
1	1164	38.713	4.16618	0.113623	0.468405	0.289356	65.3532
1	893.5	56.2745	4.97369	0.0872185	0.432982	0.278024	62.9382
1	1118	15.5802	4.43811	0.109133	0.484193	0.288041	75.9381
1	1232	51.1077	3.97165	0.120261	0.481881	0.315292	73.2447
1	1220.5	75.2872	4.11743	0.119138	0.489882	0.325985	69.896
1	1054	40.2249	4.55198	0.102886	0.464095	0.277019	75.115
1	877	21.6938	5.10921	0.0856078	0.433036	0.248988	77.4937
1	1176	20.5167	4.32074	0.114795	0.494896	0.271396	82.5066
1	853	42.4861	5.36745	0.0832651	0.446885	0.240734	64.2946
1	1193.5	22.2482	4.1974	0.116503	0.488252	0.288164	82.3538
1	1104.5	24.124	4.41575	0.107815	0.475159	0.271365	74.8687
1	885	32.7223	5.07013	0.0863887	0.438002	0.252319	83.6145
1	825	23.9956	4.90482	0.0805319	0.397233	0.257639	79.6388
1	868	66.8633	5.19423	0.0847293	0.440725	0.257694	77.3756
1	1183	15.7167	4.27848	0.115478	0.496982	0.323073	79.7554
1	1221.5	52.9333	4.16161	0.119236	0.496331	0.298444	75.3398
1	1163	32.3634	4.05293	0.113526	0.468004	0.31437	47.9196
1	1420	51.3945	3.89558	0.138612	0.538488	0.32037	85.5396
1	1184.5	33.7852	3.93907	0.115624	0.455352	0.331365	84.9221
1	1383.5	27.362	3.91928	0.13505	0.52917	0.304213	85.2657
1	1194.5	25.4768	4.97904	0.1166	0.573206	0.278645	75.4387
1	1285.5	24.4546	4.18055	0.125483	0.524586	0.308291	87.823
1	1003.5	29.4028	4.5115	0.0979561	0.441716	0.293641	45.0385
1	1280.5	45.1727	3.868	0.124995	0.485112	0.322688	83.8194
1	1176	15.6198	4.39856	0.114795	0.503985	0.278136	73.7853
1	1084	47.7757	4.51794	0.105814	0.473274	0.298773	71.2382
1	1138	28.6632	4.52306	0.111085	0.498952	0.283559	85.8489
1	1084	21.153	4.31002	0.105814	0.452141	0.283086	82.9724
1	932.5	23.7257	5.06308	0.0910254	0.460978	0.263094	74.4134
1	942.5	16.0386	4.7433	0.0920016	0.437287	0.263997	63.5042
1	1146.5	67.4548	4.19853	0.111915	0.471401	0.284988	65.4226
1	1201	29.9789	5.24259	0.117235	0.6146	0.277292	70.2948
1	1445.5	51.2529	3.74519	0.141102	0.529257	0.333187	84.3587
1	1284	37.424	4.21022	0.125337	0.526023	0.277432	69.3682
1	1039.5	27.417	4.93415	0.10147	0.499038	0.260782	80.3193
1	1144	65.4773	4.03445	0.111671	0.446723	0.312854	64.0349
1	1082	66.7172	4.83721	0.105619	0.512077	0.261558	85.7724
1	1114	48.5034	4.63073	0.108742	0.506171	0.294911	76.3339
1	1105.5	20.6404	4.27506	0.107913	0.464264	0.292636	69.3457
1	1146	29.8788	4.1746	0.111866	0.467333	0.296204	88.2593
1	1210.5	26.514	4.27631	0.118162	0.501524	0.294633	72.3152
1	1324.5	39.6738	3.99378	0.12929	0.514761	0.318601	74.9575
1	1476.5	27.859	3.54789	0.144128	0.511619	0.344541	78.2536
1	1090.5	66.9792	4.11598	0.106449	0.429967	0.29909	61.4121
1	1173.5	48.3862	4.05366	0.11455	0.460523	0.28673	73.4954
1	1417.5	27.158	3.90874	0.138368	0.538538	0.316895	82.693
1	1104.5	23.0468	4.30961	0.107815	0.463939	0.30257	56.0082
1	927	31.6985	4.53356	0.0904885	0.409711	0.265198	58.6324
1	1256	72.8411	3.86141	0.122604	0.473861	0.323876	38.1621
1	1143.5	26.184	4.32841	0.111622	0.481656	0.291399	73.3398
1	658.5	14.8148	5.9255	0.0642791	0.381637	0.217424	79.959
1	1111.5	30.7981	4.44588	0.108498	0.486734	0.303948	79.094
1	1379	54.525	4.16574	0.13461	0.562573	0.339584	76.1533
1	1445	52.6509	4.2439	0.141053	0.597839	0.284801	85.9907
1	1261.5	31.9663	4.35103	0.123141	0.537354	0.288749	76.2014
1	1168	19.5559	4.42546	0.114014	0.506613	0.286869	80.8392
1	1153.5	45.0748	4.29328	0.112598	0.483174	0.27664	78.217
1	959	27.0971	4.68813	0.0936122	0.441293	0.273494	55.7831
1	853.5	17.9847	4.94165	0.0833139	0.41303	0.254676	50.9801
1	1109.5	20.81	4.41202	0.108303	0.478878	0.275018	82.4626
1	820.5	17.1158	5.70406	0.0800926	0.44924	0.223781	72.9059
1	1091.5	24.9232	4.9012	0.106546	0.521416	0.272911	84.9545
1	955	16.5407	4.74341	0.0932218	0.434032	0.279856	54.1442
1	1031.5	32.409	4.84057	0.100689	0.486979	0.253564	66.6141
1	1200	37.8089	4.54859	0.117137	0.532024	0.273269	81.5749
1	1145	54.6707	4.15174	0.111768	0.460973	0.298301	63.6317
1	1335	47.1918	4.50389	0.130315	0.586589	0.263433	72.3188
1	1300	41.1643	4.11994	0.126899	0.519158	0.317381	85.1133
1	1079.5	42.1517	4.61108	0.105375	0.486269	0.283694	67.9564
1	1237	19.4987	4.27848	0.120749	0.516423	0.27598	77.0994
1	1237	48.1347	4.1497	0.120749	0.499039	0.302694	83.6737
1	852.5	41.6271	5.43146	0.0832163	0.445618	0.225522	70.7731
1	1116.5	50.1732	4.54616	0.108986	0.493962	0.261937	42.9504
1	1065.5	16.9875	4.56537	0.104008	0.476946	0.289314	74.253
1	1248	28.8772	3.85802	0.121823	0.471033	0.326515	79.2978
1	1038	47.3005	4.52085	0.101324	0.454999	0.286889	77.5598
1	1279.5	17.8078	3.74749	0.124898	0.468168	0.327308	76.5082
1	1078.5	47.6299	4.34456	0.105277	0.454831	0.289122	64.7578
1	890	6.72346	5.0595	0.0868768	0.438774	0.282986	64.891
1	1000.5	68.8372	5.19758	0.0976632	0.50241	0.251595	72.8028
1	703	32.7231	5.70386	0.0686229	0.39802	0.24098	70.9502
1	1004.5	24.3147	4.78882	0.0980537	0.46697	0.302127	81.6488
1	1240.5	27.2469	4.11229	0.121091	0.498118	0.310848	80.2206
1	833	13.1475	4.78199	0.0813128	0.385282	0.262567	65.2502
1	1297	24.5487	4.00151	0.126606	0.507346	0.318518	83.0519
1	1064	40.0262	4.50191	0.103862	0.457969	0.285036	82.2833
1	1179	42.0803	4.13047	0.115087	0.47641	0.324572	65.1236
1	953.5	11.7955	4.75292	0.0930753	0.435555	0.25839	74.8833
1	950.5	58.3421	4.67292	0.0927825	0.435447	0.270484	55.5038
1	1446	23.3836	3.99984	0.14115	0.558259	0.316854	83.1037
1	929	41.8642	5.00515	0.0906838	0.453717	0.244045	84.1673
1	1119.5	21.7421	4.59688	0.109279	0.504937	0.294823	62.1032
1	1291.5	51.5216	4.3222	0.126069	0.544011	0.284669	85.3124
1	1113.5	54.2711	4.27837	0.108694	0.464307	0.28652	55.9337
1	1292	53.4817	3.96257	0.126118	0.498848	0.300074	57.0217
1	1465	15.7604	3.90302	0.143005	0.557716	0.321752	77.8512
1	1241	45.2041	4.33812	0.121139	0.526482	0.294292	81.3863
1	1079	23.407	4.13528	0.105326	0.435448	0.294494	82.6271
1	1253	38.6139	4.51916	0.122311	0.540052	0.282871	76.2501
1	1082	36.8708	4.30611	0.105619	0.455563	0.293504	65.729
1	1233.5	33.1397	3.97008	0.120407	0.473566	0.320535	79.1462
1	1045.5	35.2525	4.24276	0.102056	0.432111	0.287876	74.5162
1	1197	27.1285	4.15711	0.116844	0.481196	0.30054	84.6722
1	1107.5	31.6513	4.55957	0.108108	0.49077	0.26997	83.0303
1	1375.5	24.624	4.17708	0.134269	0.557576	0.296817	78.306
1	976	19.3352	4.71042	0.0952717	0.454322	0.267639	52.5939
1	1252.5	21.449	4.31537	0.122262	0.525048	0.296028	79.4484
1	1381.5	56.786	4.46505	0.134854	0.600977	0.287337	77.0421
1	1382.5	22.881	3.91831	0.134952	0.526207	0.319902	82.6281
1	1039	26.6461	4.58889	0.101421	0.461984	0.29015	67.6116
1	713	60.8932	5.45798	0.0695991	0.381401	0.203271	50.855
1	1159.5	24.9453	3.97464	0.113184	0.446826	0.310507	60.9675
1	1109	28.3783	4.98487	0.108254	0.529342	0.272009	85.5583
1	1064	36.2718	4.24863	0.103862	0.444478	0.293504	42.1933
1	1057.5	68.6783	4.68204	0.103227	0.485281	0.303093	59.9658
1	1190.5	44.1624	4.21298	0.11621	0.490148	0.302415	73.0417
1	1351.5	39.2168	4.47764	0.131926	0.590888	0.276339	77.7947
1	971.5	24.7794	4.39273	0.0948324	0.418103	0.281445	42.457
1	1091.5	35.8532	4.42437	0.106546	0.464919	0.276879	53.9184
1	1373.5	38.0316	3.88907	0.134073	0.521438	0.317912	86.1593
1	1186	39.6015	4.41586	0.115771	0.511383	0.294088	67.5821
1	1152.5	35.7374	4.10285	0.112501	0.464303	0.319074	60.4066
1	1357.5	25.6628	4.17671	0.132512	0.553423	0.3041	83.6464
1	1088	15.8987	4.57973	0.106204	0.483525	0.281347	68.7777
1	1047	29.0253	4.51311	0.102202	0.454601	0.270673	66.8311
1	1292.5	47.2496	3.66683	0.126167	0.460454	0.305532	54.4706
1	1006	48.3983	4.67938	0.0982001	0.458769	0.272492	71.193
1	1223.5	63.0775	4.25588	0.119431	0.502693	0.291048	80.0872
1	995	58.2529	4.88192	0.0971263	0.473528	0.282532	67.5442
1	1037	46.3078	4.30607	0.101226	0.435905	0.29246	73.155
1	1190.5	49.68	4.18157	0.11621	0.484457	0.304027	53.556
1	1027.5	45.0965	4.51477	0.100299	0.452929	0.271087	72.453
1	1100	52.4532	4.65065	0.107376	0.500884	0.281814	60.8905
1	1389	56.6615	3.92689	0.135586	0.532536	0.317592	72.551
1	975	28.4409	4.56935	0.095174	0.435397	0.267733	86.361
1	929	43.6707	4.65509	0.0906838	0.420503	0.267268	65.9809
1	1141	15.535	4.11213	0.111378	0.457898	0.313791	60.9962
1	1219	28.0842	4.06549	0.118992	0.485235	0.311313	53.2763
1	1107	44.1519	4.43944	0.108059	0.475941	0.306077	87.7073
1	1508	53.9249	4.49412	0.147203	0.659943	0.292375	72.3178
1	1270.5	31.9713	3.97557	0.124019	0.493273	0.310851	89.8344
1	1421	27.6122	4.43916	0.13871	0.605265	0.285671	86.2543
1	1361.5	37.8183	4.02428	0.132902	0.531582	0.294503	82.3514
1	1111.5	21.0994	4.38229	0.108498	0.476226	0.312505	75.48
1	1120.5	61.353	4.1091	0.109377	0.448185	0.309117	69.8482
1	1443	19.1992	4.25957	0.140858	0.599993	0.318322	84.5944
1	1318	63.6575	4.50572	0.128656	0.579435	0.284614	75.0806
1	729.5	21.3183	5.37178	0.0712097	0.377702	0.24118	85.8791
1	1127.5	38.7896	4.56387	0.11006	0.504105	0.281415	68.6028
1	1021	56.4916	4.37576	0.0996643	0.435899	0.294905	48.3005
1	1337.5	44.5417	4.11886	0.130559	0.537435	0.309275	83.6125
1	1290.5	28.345	4.11231	0.125971	0.514962	0.293862	86.2625
1	980	28.879	4.88571	0.0956621	0.457443	0.256786	53.0742
1	1199	22.4292	4.0414	0.11704	0.472912	0.304265	83.8768
1	1152.5	51.5336	4.12437	0.112501	0.464285	0.298855	72.3402
1	1182.5	31.8872	3.92622	0.115429	0.44869	0.314293	72.362
1	1265.5	32.0569	4.4147	0.123531	0.542225	0.305023	78.2136
1	1213.5	44.3562	4.16544	0.118455	0.489236	0.29217	67.4642
1	814	35.8518	4.65303	0.0794581	0.370162	0.276409	60.6937
1	1177	27.788	4.15753	0.114892	0.481082	0.320684	87.8713
1	1313	59.8103	3.80063	0.128168	0.486531	0.327486	87.6343
1	1009.5	38.1755	4.91916	0.0985417	0.48361	0.262965	78.6278
1	1167	20.7015	4.08705	0.113916	0.463445	0.297781	79.3975
1	1211.5	30.2957	4.35752	0.11826	0.511628	0.286003	86.669
1	1140	54.2074	4.10688	0.11128	0.45647	0.31069	78.4861
1	1022.5	78.9397	4.8376	0.0998107	0.464215	0.265676	55.4948
1	1188.5	19.7861	4.23821	0.116015	0.483833	0.291254	84.3003
1	1426.5	23.1794	3.98039	0.139247	0.553895	0.293521	82.3523
1	1003.5	18.6785	5.09073	0.0979561	0.49872	0.319806	72.0024
1	1155	52.2398	4.15039	0.112745	0.466259	0.271973	60.0183
1	1111.5	54.4817	4.39466	0.108498	0.47245	0.294269	77.9721
1	902.5	29.417	4.52025	0.088097	0.39739	0.276817	76.9733
1	1242.5	40.1546	4.35784	0.121286	0.522843	0.275681	81.4585
1	974.5	44.4382	4.86162	0.0951252	0.462846	0.251017	69.0486
1	1121	47.3567	4.13939	0.109426	0.454357	0.307622	87.0347
1	874.5	34.359	4.69153	0.0853638	0.399532	0.248965	70.4369
1	1063	12.2795	4.24536	0.103764	0.440659	0.299229	75.2283
1	1095.5	28.3807	4.53388	0.106937	0.482032	0.279503	78.7511
1	1161.5	59.184	4.07651	0.113379	0.461092	0.313015	74.865
1	1477.5	22.6008	4.09629	0.144225	0.588645	0.300586	85.3049
1	1222.5	37.1062	4.00721	0.119334	0.47783	0.313385	60.7901
1	1173.5	45.7271	4.48685	0.11455	0.513199	0.287235	77.2314
1	1027.5	33.1136	4.74794	0.100299	0.470235	0.253539	71.2811
1	949	53.3625	4.60297	0.0926361	0.423633	0.267491	55.777
1	1304	23.7902	4.185	0.127289	0.531796	0.290399	64.5223
1	983	84.389	4.63785	0.095955	0.446319	0.280025	68.5187
1	1101	59.345	4.28135	0.107473	0.454843	0.27929	70.9978
1	1188.5	46.7624	3.98478	0.116015	0.465867	0.333946	52.1086
1	1263	78.0147	4.02969	0.123287	0.487135	0.291385	74.9733
1	883	27.1155	4.68172	0.0861935	0.406304	0.278278	75.9882
1	1013.5	49.4316	4.7811	0.0989322	0.480307	0.302351	72.7667
1	1149	45.5815	3.99314	0.112159	0.442578	0.302498	83.501
1	1100.5	35.8531	4.58663	0.107425	0.495832	0.298134	81.4304
1	1062.5	35.138	4.65003	0.103715	0.484533	0.294918	73.292
1	993.5	26.2558	5.04599	0.0969799	0.488277	0.281953	73.0029
1	1127.5	27.3191	4.61128	0.11006	0.504603	0.283754	75.053
1	967.5	23.2035	4.60841	0.0944419	0.432269	0.278094	69.7974
1	1179.5	19.3993	4.28273	0.115136	0.491879	0.285598	79.5354
1	1340	46.2262	3.86414	0.130803	0.506121	0.329385	78.8613
1	1109	28.7508	4.87135	0.108254	0.514705	0.280358	80.5783
1	1233	37.2289	3.98372	0.120359	0.476845	0.304593	53.3735
1	1128	27.7417	4.49931	0.110109	0.494764	0.279452	82.1903
1	1249.5	54.3339	4.38057	0.121969	0.531467	0.293103	87.2998
1	1233	56.8336	4.08029	0.120359	0.494564	0.304978	60.0156
1	1258.5	53.8493	4.12455	0.122848	0.502426	0.30826	65.9935
1	1217.5	34.0873	4.22597	0.118846	0.501447	0.297471	85.3325
1	1224.5	43.0177	3.71728	0.119529	0.444122	0.304953	64.6307
1	1115	31.4935	5.21836	0.10884	0.574426	0.283525	53.2658
1	1132.5	72.983	4.88176	0.110548	0.533836	0.299144	64.2221
1	1227.5	27.4797	4.34378	0.119822	0.521493	0.294905	69.1111
1	749	15.771	5.33159	0.0731132	0.38714	0.239424	75.133
1	1471	16.3516	3.9273	0.143591	0.563847	0.317666	82.6577
1	1400.5	35.3265	3.82958	0.136709	0.517108	0.307931	56.2246
1	1222	14.8788	4.3187	0.119285	0.515883	0.280907	83.7677
1	1434	32.0007	3.69063	0.139979	0.515814	0.313893	81.2653
1	1054	40.6543	4.23262	0.102886	0.426667	0.274059	63.877
1	1009	30.5588	4.86626	0.0984929	0.47866	0.261374	69.0355
1	1378.5	32.6371	4.27631	0.134561	0.567782	0.307694	79.152
1	1194.5	37.5643	4.80225	0.1166	0.553715	0.278191	66.8346
1	1118	52.8288	4.27204	0.109133	0.466194	0.305525	67.6978
1	1289	36.558	4.1897	0.125825	0.527037	0.303464	75.3793
1	1595	21.3782	3.73711	0.155695	0.578862	0.31616	70.7415
1	817.5	33.1934	4.84572	0.0797998	0.387025	0.256595	52.8611
1	890	41.6565	4.68887	0.0868768	0.398868	0.255037	76.9674
1	1005.5	59.0065	4.70765	0.0981513	0.461702	0.281249	60.4152
1	1360.5	56.3508	4.21684	0.132804	0.553396	0.292578	84.4314
1	1153.5	34.1863	4.55483	0.112598	0.513119	0.286688	64.3788
1	1107.5	21.0111	4.57348	0.108108	0.495785	0.269647	85.8434
1	1023.5	15.5158	4.505	0.0999083	0.43876	0.268542	81.9146
1	1207	26.5618	4.10803	0.117821	0.483295	0.307476	83.8817
1	1563	19.9044	3.85145	0.152571	0.587557	0.319941	83.5171
1	1163.5	51.9475	4.08831	0.113574	0.465408	0.307108	67.0345
1	987.5	38.8749	4.64464	0.0963942	0.424718	0.264179	78.8099
1	1274	20.7261	4.4972	0.124361	0.557129	0.290832	86.3616
1	1377.5	56.3087	4.06208	0.134464	0.544391	0.28846	81.1546
1	1162.5	26.5043	4.26716	0.113477	0.484101	0.286154	76.9612
1	1470.5	19.5545	4.08363	0.143542	0.584678	0.303447	69.6323
1	1175	35.434	4.47195	0.114697	0.512625	0.297906	59.0067
1	1284.5	34.1895	4.45189	0.125386	0.550994	0.298975	80.6505
1	1308	24.7721	3.98809	0.12768	0.508458	0.325271	67.5567
1	1104.5	27.8954	4.21546	0.107815	0.453656	0.298912	72.3901
1	1318	46.2302	3.94418	0.128656	0.502764	0.331769	70.873
1	1417	49.9403	4.09059	0.13832	0.559353	0.298999	78.0301
1	1254	52.6211	4.22947	0.122408	0.516173	0.309122	79.9078
1	1222.5	49.7745	4.61897	0.119334	0.543901	0.292722	69.5756
1	1378	55.1838	4.2567	0.134513	0.56395	0.280111	84.0037
1	1105.5	26.3294	4.70169	0.107913	0.506575	0.282273	76.7185
1	1333	22.6447	4.19295	0.13012	0.545506	0.296995	73.6044
1	1347	25.246	4.2427	0.131487	0.557749	0.281213	70.7876
1	1250	32.8527	3.73923	0.122018	0.452316	0.337086	39.4999
1	1086.5	37.8489	4.2766	0.106058	0.453492	0.297115	83.7039
1	1155	22.9812	4.47229	0.112745	0.505506	0.28375	82.12
1	993.5	53.9473	4.7357	0.0969799	0.462746	0.286154	55.8274
1	940	16.0243	4.34505	0.0917575	0.398307	0.276	78.6005
1	1406	29.5735	4.04926	0.137246	0.555911	0.288368	70.2338
1	1357.5	16.742	4.05005	0.132512	0.533195	0.290752	75.087
1	1138.5	22.8242	4.81325	0.111134	0.518671	0.279745	65.0983
1	1095	50.9143	4.52616	0.106888	0.473811	0.290848	63.6346
1	1357	51.6249	3.78322	0.132463	0.501451	0.334293	87.395
1	1021.5	27.1576	4.11696	0.0997131	0.407462	0.290449	76.4149
1	1286	52.4042	4.35419	0.125532	0.541059	0.28813	80.6597
1	1131	13.5177	4.45028	0.110402	0.487167	0.282296	81.2927
1	1334.5	51.4366	4.2046	0.130266	0.546257	0.308914	62.1579
1	1021	63.3472	4.65097	0.0996643	0.451322	0.284446	68.8131
1	1137.5	71.8589	4.60271	0.111036	0.509112	0.27133	85.7754
1	1259	44.7528	4.09771	0.122897	0.504606	0.312199	77.4183
1	1171	31.2731	4.37282	0.114306	0.486469	0.302844	79.4781
1	911.5	46.78	4.92737	0.0889755	0.434213	0.258942	80.2848
1	1369	44.6108	4.03654	0.133634	0.540459	0.322394	82.0524
1	1179.5	39.8258	4.53622	0.115136	0.51791	0.27598	80.4953
1	1402.5	26.6486	4.13613	0.136904	0.56594	0.293346	79.4331
1	1077.5	73.2266	4.65057	0.10518	0.479619	0.293847	82.256
1	950.5	59.2955	5.13783	0.0927825	0.448963	0.251569	55.9258
1	1428.5	38.0836	3.96499	0.139442	0.553974	0.32393	72.679
1	1106	41.8421	4.8092	0.107962	0.510244	0.288989	68.7785
1	1324	65.4554	3.79576	0.129241	0.493207	0.323799	59.4207
1	1361.5	48.4389	3.69521	0.132902	0.489267	0.347302	70.1878
1	983.5	53.8359	4.4421	0.0960038	0.426103	0.268081	79.6139
1	1085	23.9397	4.86563	0.105912	0.50737	0.254754	78.6857
1	1289	59.3102	4.33795	0.125825	0.545513	0.284195	65.3362
1	1519.5	51.9779	3.98343	0.148325	0.587171	0.322894	83.7473
1	1346.5	41.0052	4.07421	0.131438	0.534383	0.302798	67.9757
1	1037.5	55.9951	4.61153	0.101275	0.472163	0.300833	54.54
1	1177	24.9471	4.21814	0.114892	0.484531	0.306125	81.9619
1	1049	32.6742	4.68727	0.102398	0.483197	0.27867	65.3879
1	976	55.7502	4.41372	0.0952717	0.4222	0.284805	61.6092
1	1001	66.7203	4.79825	0.097712	0.46872	0.269672	85.7387
1	1041.5	38.7278	4.56417	0.101665	0.461842	0.296644	74.4197
1	1245	60.1212	3.84268	0.12153	0.467639	0.301767	52.8821
1	975.5	71.8696	4.62654	0.0952228	0.442758	0.273402	70.2128
1	1146	52.9119	4.50835	0.111866	0.496195	0.296579	71.2893
1	986	33.9593	4.57381	0.0962478	0.43149	0.283095	72.8884
1	1048	34.2443	4.41748	0.1023	0.450843	0.2983	53.7979
1	1054	48.6015	4.30876	0.102886	0.445643	0.277069	82.237
1	1286.5	37.6609	4.06572	0.125581	0.510372	0.28966	77.0979
1	1178.5	31.1856	4.30326	0.115039	0.494144	0.275614	74.0292
1	1277.5	39.7794	3.93145	0.124702	0.490637	0.323159	82.1859
1	1341	60.0209	4.23112	0.130901	0.536689	0.32807	69.5669
1	1097	27.6522	5.09095	0.107083	0.540373	0.284021	80.3603
1	1168	19.1722	4.09625	0.114014	0.467462	0.31047	82.4964
1	957	14.3397	4.94011	0.093417	0.45809	0.242142	82.3873
1	889	47.4172	4.39353	0.0867792	0.381164	0.297353	44.332
1	1277	48.5237	3.86266	0.124654	0.481421	0.308324	57.6201
1	1257.5	14.4208	4.3482	0.12275	0.533332	0.280517	77.418
1	1257.5	32.55	4.04512	0.12275	0.497693	0.323921	89.0304
1	1028.5	70.3751	4.56795	0.100396	0.458541	0.2881	84.2568
1	852.5	49.3595	5.40654	0.0832163	0.447986	0.271959	62.1651
1	1069.5	27.848	4.72395	0.104399	0.497589	0.275745	80.6369
1	1268	29.8144	4.14707	0.123775	0.509143	0.303938	82.3903
1	1593.5	45.7837	3.86882	0.155549	0.601056	0.297483	85.7237
1	1226	48.7954	4.46432	0.119675	0.53321	0.301357	86.5735
1	1213	52.1212	4.28318	0.118406	0.503985	0.302868	71.6133
1	1389	32.8959	3.98257	0.135586	0.536335	0.309884	71.5651
1	1238.5	52.8794	4.1148	0.120895	0.495506	0.275871	78.2211
1	1609.5	39.3864	3.74633	0.15711	0.588439	0.317433	79.3395
1	954.5	22.3632	4.62798	0.0931729	0.42884	0.266842	69.8053
1	1195.5	60.2203	4.02838	0.116698	0.470699	0.316199	62.2893
1	1051.5	56.6194	4.86692	0.102642	0.493296	0.288896	57.7181
1	1287	31.2042	4.61591	0.12563	0.573437	0.277302	80.8306
1	1562.5	40.8351	3.81562	0.152523	0.580046	0.303454	72.6703
1	899.5	86.2424	6.95719	0.0878042	0.610493	0.254386	73.7884
1	1222	34.7809	4.35786	0.119285	0.518316	0.296565	63.3078
1	969.5	40.2479	4.69123	0.0946372	0.441018	0.276274	72.9018
1	1270.5	52.8751	4.26586	0.124019	0.529079	0.272492	75.9118
1	1405.5	63.787	4.19761	0.137197	0.57231	0.323044	65.1278
1	1329	53.7101	4.11699	0.12973	0.5321	0.292602	73.4095
1	1487.5	67.5262	3.74126	0.145201	0.543097	0.322961	49.5699
1	1339.5	66.0464	3.89017	0.130754	0.507934	0.312742	64.6476
1	1195.5	30.4044	4.41556	0.116698	0.52245	0.303665	50.798
1	1348	36.6326	3.80894	0.131584	0.503216	0.300489	49.9968
1	1442.5	61.776	3.81081	0.140809	0.536694	0.315799	88.2156
1	1165.5	45.8799	4.40156	0.11377	0.500918	0.268672	76.6907
1	1018.5	68.5724	4.63091	0.0994203	0.445763	0.291154	54.3694
1	1092	57.9003	4.61086	0.106595	0.482872	0.293084	64.8465
1	1635	35.3079	3.91141	0.1596	0.624824	0.330872	77.8421
1	946	19.8847	4.79574	0.0923432	0.438523	0.263383	83.9249
1	1354.5	63.5917	4.34462	0.132219	0.574136	0.31135	67.586
1	1428	36.066	4.18715	0.139393	0.574325	0.302206	81.1252
1	1025	61.2236	4.9077	0.100055	0.489283	0.26264	68.6807
1	1482	51.3419	3.79121	0.144665	0.547841	0.335352	74.8859
1	846.5	21.4753	5.39176	0.0826306	0.451582	0.240068	81.0094
1	1053	44.5283	4.70003	0.102788	0.474166	0.268325	58.5834
1	677	53.7672	5.93314	0.0660849	0.394933	0.23224	61.0373
1	1158	11.1324	4.2765	0.113037	0.480153	0.286154	61.5093
1	1110	49.2324	4.13963	0.108352	0.444294	0.301502	38.2616
1	1097.5	40.3596	4.64639	0.107132	0.494459	0.269771	56.6578
1	1034.5	23.4344	4.40561	0.100982	0.440105	0.291921	81.514
1	1167.5	47.0843	4.34008	0.113965	0.492815	0.300857	68.5274
1	1051	41.4693	4.46784	0.102593	0.442859	0.283285	50.6423
1	1298.5	17.3654	3.86385	0.126752	0.47381	0.317611	70.639
1	1278	15.2097	3.97437	0.124751	0.494952	0.30448	85.6734
1	916	35.3631	5.02868	0.0894148	0.450723	0.241689	85.999
1	1049.5	33.471	4.13303	0.102446	0.418786	0.296019	60.918
1	1370.5	23.903	4.21657	0.133781	0.556748	0.298413	83.2028
1	930	43.5822	4.89907	0.0907814	0.444657	0.234808	71.6224
1	1607.5	44.7586	3.6673	0.156915	0.578936	0.356297	70.2438
1	1221	33.3356	4.14471	0.119187	0.493701	0.291704	63.1497
1	1196	49.2732	4.38892	0.116747	0.51403	0.324536	43.1314
1	1321.5	47.3203	4.10986	0.128997	0.529718	0.301703	89.129
1	1094.5	48.6488	4.51704	0.106839	0.489013	0.294638	86.0372
1	1265.5	48.6899	3.85484	0.123531	0.476283	0.327054	48.8538
1	1241	60.9695	3.9326	0.121139	0.476267	0.309618	62.1392
1	1069	20.4814	4.48721	0.10435	0.468408	0.28404	64.984
1	1279.5	31.7537	4.43798	0.124898	0.552628	0.280358	78.2925
1	1385	20.6313	3.93527	0.135196	0.525365	0.320684	80.5372
1	1380	47.4647	4.17583	0.134708	0.562647	0.307786	81.2274
1	1116.5	40.9548	4.27094	0.108986	0.468701	0.30662	71.4467
1	1118	24.8357	4.40875	0.109133	0.47959	0.27664	82.5727
1	950.5	47.1338	5.04764	0.0927825	0.471329	0.267827	81.8682
1	1122.5	39.8291	4.55054	0.109572	0.492743	0.283053	66.2234
1	1099	57.2149	4.62745	0.107278	0.496887	0.284233	49.8478
1	1378	38.1338	4.0574	0.134513	0.545706	0.301175	78.6088
1	1350.5	27.9552	3.56257	0.131828	0.467314	0.355605	70.9007
1	1064.5	23.3494	4.46514	0.103911	0.466849	0.286224	77.8652
1	1103.5	25.5737	4.77767	0.107717	0.510514	0.254208	84.8008
1	1078.5	22.1437	4.2846	0.105277	0.448606	0.29672	72.0664
1	1030	17.2317	4.41791	0.100543	0.438443	0.283181	77.8024
1	1223.5	24.9897	4.4038	0.119431	0.517559	0.282564	82.7924
1	1268	44.7148	4.23593	0.123775	0.524359	0.289887	80.812
1	1177.5	38.5304	4.46013	0.114941	0.506996	0.278211	75.193
1	1152.5	18.267	4.28975	0.112501	0.478343	0.293334	62.3375
1	1242	43.0326	4.3899	0.121237	0.529631	0.289124	59.6478
1	1297	33.1543	4.75971	0.126606	0.592545	0.273722	75.4698
1	1168	50.6159	4.48492	0.114014	0.508434	0.290566	68.5854
1	1056.5	46.5576	4.78266	0.10313	0.493231	0.280922	72.6989
1	1518.5	54.8162	3.7474	0.148227	0.555032	0.327994	68.1227
1	1138	12.6677	4.09119	0.111085	0.45157	0.309579	66.49
1	1143	50.135	4.71254	0.111573	0.525248	0.286964	73.4826
1	1384.5	19.6971	3.93122	0.135147	0.530707	0.303921	64.1203
1	1314	69.0967	3.86663	0.128265	0.495065	0.344556	73.7776
1	1188.5	37.2405	4.29942	0.116015	0.500176	0.285494	77.5888
1	989.5	28.1361	5.31168	0.0965894	0.514655	0.245839	79.5706
1	1535.5	32.0428	3.66667	0.149887	0.548434	0.316571	72.8149
1	964.5	55.312	4.78183	0.0941491	0.445437	0.267552	67.7182
1	966	27.0564	4.80017	0.0942955	0.447455	0.254062	65.2045
1	923.5	43.3031	5.41793	0.0901469	0.486432	0.241317	85.5329
1	869.5	26.4284	5.19618	0.0848757	0.435909	0.255028	71.9367
1	819	39.0381	4.97263	0.0799462	0.391271	0.247	51.7504
1	862.5	23.6434	5.36442	0.0841924	0.448634	0.243446	81.5723
1	1020.5	27.6402	4.51037	0.0996155	0.44718	0.291636	80.2563
1	1115.5	36.7591	4.43773	0.108889	0.467024	0.292549	71.8883
1	1073.5	55.1777	4.91286	0.104789	0.515677	0.304283	66.7154
1	886	15.8798	5.14545	0.0864864	0.453774	0.278207	73.8904
1	1144	26.2153	4.44983	0.111671	0.49415	0.284	79.0959
1	1064	25.5779	5.02	0.103862	0.509401	0.27972	70.8896
1	628.5	30.7809	6.41267	0.0613507	0.398812	0.224633	61.2105
1	1011.5	9.54279	4.13509	0.098737	0.404267	0.31426	53.9432
1	1218.5	33.3577	4.03512	0.118943	0.480542	0.290901	80.0514
1	1025	21.9932	4.69083	0.100055	0.464541	0.258883	76.6876
1	980	18.2037	4.39184	0.0956621	0.418257	0.280161	54.352
1	953	31.7045	4.65784	0.0930265	0.430947	0.262185	71.3735
1	1202.5	21.4875	4.07967	0.117381	0.478982	0.294912	86.4236
1	1009	17.0409	4.4669	0.0984929	0.441139	0.283694	82.8473
1	1142.5	41.1684	4.6665	0.111524	0.5187	0.27405	74.7643
1	1094	28.432	4.52136	0.10679	0.478338	0.278399	84.4245
1	1067	37.9069	4.58842	0.104155	0.48234	0.292465	69.9492
1	1281	34.5612	4.41878	0.125044	0.548566	0.288055	75.0359
1	1083	38.7259	4.91965	0.105716	0.518351	0.259778	86.1617
1	1180	17.8646	4.58211	0.115185	0.525333	0.287204	78.935
1	970	36.988	5.1123	0.094686	0.482627	0.264551	79.8758
1	939	20.7854	5.37816	0.0916599	0.492265	0.230234	80.2039
1	899	16.5054	5.01878	0.0877553	0.441851	0.261072	62.2063
1	1179.5	48.1252	4.09198	0.115136	0.470789	0.318958	86.7574
1	1055	13.1949	4.91428	0.102983	0.499529	0.260343	82.5592
1	994.5	16.1743	4.89427	0.0970775	0.474042	0.26739	71.1175
1	775.5	27.2985	5.64677	0.0757	0.427788	0.223668	65.5819
1	1087	39.5113	4.27772	0.106107	0.452893	0.282963	68.6938
1	767.5	24.4184	5.5046	0.0749191	0.397456	0.217711	63.8772
1	812	33.259	6.18912	0.0792629	0.492422	0.227601	78.2321
1	781	22.487	5.24648	0.0762368	0.400078	0.250332	67.6103
1	1244.5	17.4484	4.25877	0.121481	0.511882	0.298	78.8493
1	750.5	12.2096	5.23478	0.0732596	0.383807	0.246757	74.1501
1	1013	21.3532	4.71148	0.0988834	0.464464	0.260371	78.6711
1	1312.5	28.9734	4.27236	0.128119	0.54516	0.29146	80.5477
1	883.5	21.673	5.20355	0.0862423	0.44895	0.240479	79.4228
1	1106.5	24.7196	3.93651	0.10801	0.422433	0.319414	31.8155
1	1291	24.1841	4.51023	0.12602	0.568597	0.286964	80.3366
1	1286	28.1283	4.47069	0.125532	0.562417	0.304919	67.424
1	1189	29.8019	4.28554	0.116064	0.494538	0.289858	84.2702
1	1116	24.7504	4.89719	0.108938	0.526363	0.245373	71.0756
1	1349.5	72.1371	4.01181	0.131731	0.527173	0.295374	81.9905
1	930	19.6078	4.9435	0.0907814	0.448165	0.256459	75.1522
1	1162.5	28.7435	4.30804	0.113477	0.488591	0.284887	70.5607
1	1193	49.4617	4.31299	0.116454	0.501098	0.303636	76.8146
1	1118.5	61.898	5.33395	0.109182	0.56089	0.237129	58.7889
1	877	6.35771	5.06391	0.0856078	0.42925	0.249446	79.6705
1	1232.5	52.9649	3.88397	0.12031	0.468096	0.318962	88.339
1	1369	20.9191	4.05954	0.133634	0.543537	0.327158	67.3562
1	827.5	35.6821	5.07155	0.0807759	0.407083	0.27058	65.9389
1	1308.5	52.8634	4.11091	0.127728	0.524995	0.299335	81.7896
1	1200	20.1972	4.4158	0.117137	0.517771	0.3041	83.2331
1	1308	52.7032	4.16014	0.12768	0.529958	0.294395	80.4085
1	1375.5	28.5943	4.0154	0.134269	0.537074	0.287523	84.9642
1	1353	15.7575	3.74393	0.132072	0.495723	0.333435	78.2363
1	1377	57.9983	3.71125	0.134415	0.497534	0.36335	60.7977
1	1273.5	46.8953	3.96862	0.124312	0.492515	0.317051	66.6565
1	1619	54.9527	4.32039	0.158038	0.674748	0.294291	81.0274
1	1492.5	22.5223	4.0655	0.145689	0.594787	0.325202	69.7536
1	1053	31.164	4.72566	0.102788	0.476878	0.295734	65.7121
1	1190	48.8488	3.98745	0.116161	0.462928	0.314457	68.0024
1	1037.5	19.8944	4.5616	0.101275	0.457366	0.258284	75.1976
1	1074.5	32.7437	4.21593	0.104887	0.442588	0.317525	67.2725
1	1113.5	12.5529	4.69448	0.108694	0.510425	0.280336	83.3492
1	1028	44.0082	4.27308	0.100348	0.429034	0.292272	55.3249
1	1010.5	45.8486	5.01472	0.0986394	0.491098	0.238592	64.9591
1	1329	46.772	4.37946	0.12973	0.568145	0.271791	58.5621
1	1120.5	12.2699	4.28875	0.109377	0.468329	0.296881	71.0308
1	1164.5	63.8602	4.30356	0.113672	0.48098	0.312835	66.7326
1	1096	33.2654	4.19898	0.106985	0.446075	0.326209	59.4512
1	968	35.6532	5.21213	0.0944907	0.491294	0.266563	59.9946
1	875.5	75.4849	5.43221	0.0854614	0.452039	0.24444	62.1267
1	1223.5	50.4473	4.0296	0.119431	0.473749	0.313003	84.0948
1	962	43.2514	5.30615	0.0939051	0.492317	0.262652	78.8844
1	889.5	11.6758	4.97258	0.086828	0.432571	0.264354	32.8256
1	1141.5	29.903	4.4121	0.111427	0.491092	0.299012	80.1422
1	963.5	20.6027	4.7568	0.0940515	0.450437	0.277379	57.4738
1	879.5	24.9212	4.76163	0.0858519	0.412249	0.274107	67.598
1	1111	13.0672	4.19742	0.10845	0.452223	0.299414	86.1551
1	1172	37.8918	4.11615	0.114404	0.466463	0.321097	44.523
1	1103.5	25.0765	4.60904	0.107717	0.494269	0.28217	78.8567
1	1211.5	55.8316	4.1596	0.11826	0.490589	0.288788	71.3795
1	1004	13.2764	4.22348	0.0980049	0.412112	0.272823	62.883
1	1186.5	18.1957	4.00589	0.115819	0.463516	0.31633	80.3162
1	1170.5	30.291	4.43302	0.114258	0.500848	0.29488	50.5448
1	1049.5	67.5527	4.63103	0.102446	0.473753	0.275696	58.6213
1	990.5	34.1416	4.29961	0.0966871	0.414513	0.306579	47.0979
1	835	10.9853	5.29256	0.081508	0.430875	0.232814	80.0084
1	1080.5	46.7904	4.36422	0.105472	0.45894	0.30034	77.6594
1	983.5	44.0678	4.1949	0.0960038	0.402013	0.30588	84.7527
1	1474	42.177	3.56548	0.143884	0.50651	0.361113	54.8456
1	1375.5	23.4152	4.01269	0.134269	0.53659	0.294798	80.9391
1	963	63.7398	5.04099	0.0940027	0.451605	0.270161	78.2361
1	1081	27.9899	4.20306	0.105521	0.442848	0.297466	62.0574
1	988.5	24.7754	4.61453	0.0964918	0.44188	0.279681	60.8117
1	1029.5	23.4731	4.26836	0.100494	0.427973	0.303797	60.1299
1	1142	22.7027	4.34555	0.111476	0.481054	0.280035	86.4977
1	1100.5	44.1068	4.48778	0.107425	0.477211	0.272579	73.2229
1	1260.5	20.8174	3.97635	0.123043	0.488604	0.306691	70.9864
1	1138	30.5886	4.12622	0.111085	0.459874	0.308068	30.6433
1	1089.5	26.4222	4.39957	0.106351	0.46457	0.296448	86.2923
1	1119.5	43.7929	4.04829	0.109279	0.442981	0.325793	72.7818
1	1040.5	30.6083	4.64923	0.101568	0.475747	0.288034	82.906
1	1317.5	25.444	3.83375	0.128607	0.492709	0.298075	78.3107
1	1373.5	64.5689	4.15179	0.134073	0.555603	0.293862	87.1305
1	732	24.4308	5.71954	0.0714537	0.409747	0.239347	69.1555
1	1111	52.4572	3.83542	0.10845	0.415555	0.309325	66.7547
1	1243	55.7145	4.29547	0.121335	0.514078	0.297881	68.6061
1	1185	28.5043	4.11342	0.115673	0.475656	0.297591	70.0969
1	1271.5	22.9137	4.14507	0.124117	0.514401	0.321193	84.304
1	931	12.3575	5.10805	0.090879	0.464919	0.238283	72.5541
1	944.5	29.7488	4.85329	0.0921968	0.447455	0.275929	75.0959
1	918	25.1409	4.7434	0.08961	0.425114	0.271995	87.742
1	1100	40.194	4.32845	0.107376	0.464155	0.301192	68.7072
1	1134	37.9433	4.18919	0.110695	0.4633	0.296953	79.341
1	1269	18.3977	3.96406	0.123873	0.491814	0.318544	83.6492
1	1048	27.323	4.52676	0.1023	0.461746	0.30991	61.876
1	995.5	30.2747	4.89074	0.0971751	0.473139	0.271016	74.992
1	989	26.142	4.9076	0.0965406	0.472909	0.281898	55.9521
1	1202	12.6594	4.5863	0.117333	0.528509	0.284657	83.9486
1	1114.5	17.1606	4.36246	0.108791	0.47393	0.27698	72.4724
1	864	31.1645	5.53144	0.0843388	0.461938	0.238767	64.6447
1	1177	38.2965	4.11762	0.114892	0.473137	0.293046	68.6773
1	908.5	14.3295	4.99118	0.0886827	0.442123	0.219535	76.7175
1	1276.5	37.472	3.99307	0.124605	0.496161	0.301534	52.2512
1	1338.5	38.0628	4.217	0.130657	0.549828	0.323616	86.1988
1	991.5	7.1038	4.36692	0.0967847	0.422294	0.279928	77.2298
1	1160.5	14.703	4.20679	0.113282	0.468039	0.318562	72.1567
1	1152.5	21.0567	4.45126	0.112501	0.500765	0.28771	82.7131
1	1020	22.5714	4.63215	0.0995667	0.459718	0.288337	74.1279
1	991	22.0359	4.65985	0.0967359	0.450435	0.252953	77.4525
1	1297.5	35.4032	4.0782	0.126655	0.515762	0.30373	77.0903
1	922.5	17.4968	5.21222	0.0900493	0.469504	0.254973	71.5021
1	898	23.1136	5.09664	0.0876577	0.448212	0.273334	74.7715
1	888.5	32.0838	4.81198	0.0867304	0.415872	0.274865	77.3045
1	1035	12.8624	4.30512	0.101031	0.436548	0.298826	78.8843
1	1326.5	45.8713	3.97678	0.129486	0.514226	0.319621	71.2412
1	1456	27.4393	4.11586	0.142127	0.577594	0.291825	70.7189
1	1361.5	18.4	3.73731	0.132902	0.495764	0.299582	74.057
1	1040.5	15.9118	4.70099	0.101568	0.478199	0.268339	84.0398
1	1139	29.8652	4.28916	0.111183	0.475701	0.282961	66.2213
1	1003.5	19.1591	4.34906	0.0979561	0.425706	0.271015	79.0559
1	1205.5	24.5107	4.38083	0.117674	0.513423	0.292055	77.8453
1	1304.5	64.2808	4.1424	0.127338	0.526555	0.291871	75.8138
1	1053	31.8161	4.40731	0.102788	0.447213	0.300002	60.831
1	835	37.594	5.31242	0.081508	0.42877	0.237168	64.9373
1	1159	28.3088	4.23485	0.113135	0.483475	0.293965	46.4883
1	1221.5	14.3147	4.13739	0.119236	0.493174	0.282742	70.7174
1	1068.5	19.5251	4.048	0.104301	0.421636	0.310296	79.1497
1	1631	35.7298	3.62923	0.159209	0.577698	0.346082	75.3528
1	1020.5	18.4476	4.23746	0.0996155	0.421205	0.283962	80.3319
1	919	28.2997	4.78765	0.0897076	0.424224	0.273021	46.0073
1	1196.5	29.4816	4.64698	0.116796	0.538021	0.279124	76.5925
1	1219.5	43.1991	4.0459	0.119041	0.482252	0.310738	69.7933
1	1202.5	24.2238	4.1326	0.117381	0.486159	0.297619	67.5776
1	1144	29.1546	4.22335	0.111671	0.469006	0.307166	75.4401
1	979	34.2523	4.67886	0.0955645	0.439934	0.263869	70.8877
1	1247	17.8905	4.24872	0.121725	0.517545	0.283412	77.6805
1	1152.5	51.0509	4.46628	0.112501	0.50137	0.294796	77.7611
1	688.5	31.3015	6.16003	0.0672075	0.414256	0.213496	80.4574
1	1051.5	44.138	4.79985	0.102642	0.5002	0.293837	71.5156
1	1069.5	37.3689	4.43506	0.104399	0.461749	0.279705	75.9501
1	1074.5	50.5872	4.81897	0.104887	0.505545	0.274382	67.9299
1	1153.5	13.048	4.0257	0.112598	0.45258	0.294735	76.6494
1	1104	25.2144	4.2107	0.107766	0.451749	0.303417	61.9836
1	1028	50.0947	4.57202	0.100348	0.457954	0.27503	66.4795
1	967.5	14.643	4.72213	0.0944419	0.44481	0.275379	70.6179
1	1585.5	38.4985	3.80712	0.154768	0.585963	0.315098	76.2431
1	1038.5	24.9068	4.48367	0.101373	0.443869	0.27729	81.0727
1	1325	21.5279	4.17378	0.129339	0.533783	0.313488	75.093
1	1237	38.5444	4.23524	0.120749	0.509771	0.282583	65.4459
1	1233.5	40.6858	4.22471	0.120407	0.497722	0.312499	77.418
1	1176	21.2773	4.09137	0.114795	0.467407	0.291704	64.2338
1	937.5	23.6769	4.50757	0.0915135	0.414371	0.28999	66.4643
1	999.5	17.7622	4.50907	0.0975656	0.44007	0.279894	75.8194
1	1338.5	52.3213	3.89765	0.130657	0.511163	0.314529	83.4137
1	1141.5	25.2228	4.0343	0.111427	0.451078	0.327532	54.671
1	1405	24.7722	4.09188	0.137148	0.559517	0.295433	72.4778
1	1430	29.5306	3.90153	0.139589	0.544571	0.288423	73.3093
1	1230	16.7583	4.28745	0.120066	0.515779	0.292167	88.0004
1	1285.5	35.8729	4.25917	0.125483	0.532593	0.300559	60.967
1	1094.5	34.7879	4.46171	0.106839	0.475704	0.302846	69.6628
1	1280	33.7023	4.39398	0.124946	0.540083	0.294146	59.829
1	997.5	40.5776	4.79893	0.0973704	0.466865	0.283618	79.5306
1	1128.5	75.2171	4.49564	0.110158	0.488596	0.295706	63.3335
1	1115	22.5744	4.8625	0.10884	0.52744	0.280001	80.84
1	1187	41.4667	4.20944	0.115868	0.481949	0.299378	68.7796
1	916.5	20.8459	4.8288	0.0894636	0.43226	0.272703	68.2397
1	1238.5	44.2427	4.59519	0.120895	0.555696	0.285648	80.7347
1	885	19.2686	5.32638	0.0863887	0.459329	0.240391	76.7799
1	1058.5	35.6083	4.24242	0.103325	0.435742	0.303323	56.4019
1	1264	54.7556	4.39395	0.123385	0.540158	0.295649	69.1475
1	944	26.6937	4.89559	0.092148	0.445881	0.260431	69.9279
1	969	26.6585	4.65057	0.0945884	0.438611	0.267491	69.6181
1	1044	9.64555	4.38484	0.101909	0.443492	0.276609	83.4246
1	1040	16.7872	4.72134	0.101519	0.479512	0.279536	81.2885
1	1683	50.1426	3.96843	0.164285	0.64731	0.319847	79.6431
1	1121	28.6923	4.27578	0.109426	0.46871	0.297959	70.8915
1	1126.5	49.8057	4.27248	0.109963	0.468945	0.27484	71.7009
1	1174.5	44.4543	4.47463	0.114648	0.515137	0.298283	59.2436
1	1114.5	30.2065	4.25356	0.108791	0.466044	0.289933	83.7988
1	994.5	50.1711	4.77758	0.0970775	0.459623	0.252721	77.1527
1	1365	39.3038	4.21235	0.133244	0.558587	0.286665	83.7835
1	1101.5	25.0494	4.91544	0.107522	0.528572	0.283907	82.3102
1	1243	19.3311	4.4604	0.121335	0.541233	0.272179	83.3045
1	1029	27.9466	4.66456	0.100445	0.468492	0.25688	73.4305
1	1282.5	28.699	3.994	0.12519	0.500087	0.307609	77.2919
1	934.5	10.2375	4.73422	0.0912207	0.432057	0.282986	54.6009
1	953	32.4609	4.26888	0.0930265	0.397101	0.286224	60.8536
1	1073.5	19.4795	4.52573	0.104789	0.468729	0.264854	76.1446
1	1484.5	65.8594	3.9086	0.144909	0.561886	0.326113	73.6212
1	1067.5	24.2048	4.90982	0.104203	0.511402	0.252144	76.6877
1	1237	17.0072	4.25464	0.120749	0.510842	0.289076	81.6004
1	1292	15.739	4.12728	0.126118	0.520542	0.304451	83.0272
1	817.5	20.0119	4.94754	0.0797998	0.397233	0.256908	81.8323
1	1216.5	50.0852	4.23311	0.118748	0.494681	0.314869	74.3066
1	1252	62.3202	4.7193	0.122213	0.565977	0.298611	80.2105
1	1033	35.0829	4.5075	0.100836	0.454999	0.277075	43.9256
1	1010.5	45.9599	4.47768	0.0986394	0.435497	0.293272	68.6605
1	996.5	21.145	4.28986	0.0972727	0.41492	0.298092	58.1366
1	1325.5	13.468	4.23785	0.129388	0.546413	0.300851	84.6594
1	1041.5	45.6122	4.82624	0.101665	0.470601	0.271838	76.6992
1	956.5	37.4847	4.6422	0.0933682	0.43076	0.260258	70.009
1	1135	54.6556	4.42277	0.110792	0.485836	0.28892	53.4608
1	1154	21.7791	4.30044	0.112647	0.485911	0.3099	74.0381
1	1148.5	28.217	4.10374	0.11211	0.453958	0.308609	65.228
1	1302.5	64.3043	4.15811	0.127143	0.526738	0.285323	75.8973
1	1053.5	14.8768	4.68334	0.102837	0.483064	0.271227	82.2155
1	1512	55.2675	3.7976	0.147593	0.554911	0.402219	53.8647
1	986.5	46.3838	4.72748	0.0962966	0.45469	0.262965	67.6519
1	1504.5	73.9802	4.49664	0.146861	0.660217	0.324292	68.3532
1	974	39.6013	4.5538	0.0950764	0.432565	0.288457	74.0004
1	1265	37.0919	3.89334	0.123482	0.481239	0.313893	77.4027
1	1179.5	37.2936	4.40614	0.115136	0.508479	0.290896	79.6056
1	1061	31.776	4.434	0.103569	0.457228	0.295138	64.4908
1	1528	37.0387	3.94634	0.149155	0.588856	0.334364	86.5958
1	924.5	34.1729	4.80614	0.0902445	0.434032	0.263796	70.2869
1	425	25.9512	12.4222	0.0414861	0.514946	0.145653	74.2861
1	1422	56.339	3.8437	0.138808	0.532317	0.31205	78.58
1	1052.5	53.8935	4.83564	0.102739	0.496384	0.295777	69.9633
1	1040.5	34.9243	4.62269	0.101568	0.474901	0.291058	63.4398
1	1088	83.5262	4.5436	0.106204	0.481806	0.292363	73.2915
1	1037.5	36.7636	4.56017	0.101275	0.456568	0.269653	76.5894
1	1075	52.7786	5.02211	0.104935	0.525661	0.285256	76.6518
1	774	33.1653	5.36774	0.0755535	0.410249	0.254013	60.2017
1	1501.5	17.229	3.64304	0.146568	0.533701	0.33592	79.118
1	1264.5	31.4034	4.46286	0.123433	0.548464	0.282512	64.4719
1	1293.5	31.6053	4.06873	0.126264	0.514558	0.317699	50.1856
1	1450.5	33.565	4.31848	0.14159	0.603004	0.30662	79.7037
1	1106	22.0641	4.40818	0.107962	0.474241	0.270746	75.5799
1	1054.5	52.1119	4.51478	0.102934	0.463457	0.295416	72.2929
1	1182.5	36.3983	4.63568	0.115429	0.531887	0.288362	76.9662
1	1318	24.8532	4.43834	0.128656	0.553917	0.274371	70.3671
1	1217.5	42.7717	3.86656	0.118846	0.457738	0.337793	68.1155
1	1334.5	29.6608	4.15891	0.130266	0.538382	0.28966	67.469
1	887	22.5697	5.31677	0.086584	0.459257	0.216708	65.2262
1	1247.5	53.7345	3.88429	0.121774	0.470614	0.330024	60.55
1	932.5	12.9091	4.50239	0.0910254	0.407873	0.262962	81.0332
1	1260.5	48.4682	4.31573	0.123043	0.522146	0.280073	79.1703
1	1301.5	35.6925	3.80267	0.127045	0.482252	0.324037	81.5805
1	1217	25.2934	4.31902	0.118797	0.50601	0.293515	75.2648
1	1071	44.0347	4.25629	0.104545	0.445998	0.296772	78.2655
1	915	27.9939	4.92762	0.0893172	0.435141	0.25625	64.3804
1	1095.5	47.8621	4.41407	0.106937	0.475176	0.293287	44.7678
1	1385	44.2822	3.96628	0.135196	0.521587	0.316379	74.8991
1	986	53.445	4.7821	0.0962478	0.460142	0.294593	78.841
1	1100	60.923	4.61284	0.107376	0.493281	0.277503	79.1507
1	1353	64.3011	3.99765	0.132072	0.526408	0.295693	66.6708
1	1195	52.5228	4.16801	0.116649	0.486524	0.314186	58.5086
1	1184	58.2734	4.3907	0.115575	0.50211	0.281898	81.7413
1	943	42.8573	4.72332	0.0920504	0.435979	0.279536	64.4001
1	751	23.1215	5.56262	0.0733084	0.413538	0.225061	55.4751
1	1631	46.4197	3.97475	0.159209	0.631932	0.316353	79.1594
1	1092	26.7976	4.31392	0.106595	0.460098	0.292561	72.088
1	1299.5	46.4853	4.51119	0.12685	0.549285	0.304295	78.7976
1	1232.5	61.1629	4.23197	0.12031	0.50874	0.28192	79.5414
1	1020	21.9791	4.57394	0.0995667	0.453824	0.281489	65.8906
1	1159.5	22.0613	4.53591	0.113184	0.511758	0.25688	81.7215
1	1203.5	38.8462	4.64025	0.117479	0.536084	0.282876	70.6472
1	978	46.8425	6.09427	0.0954669	0.568839	0.237283	61.9348
1	1022	46.5612	4.96445	0.0997619	0.494822	0.272274	65.3126
1	1299.5	24.3294	4.04992	0.12685	0.510546	0.292771	60.1205
1	1185	55.4322	4.01029	0.115673	0.465501	0.322098	71.4191
1	932	28.7451	4.77755	0.0909766	0.434725	0.265355	70.9712
1	1263.5	31.287	4.03339	0.123336	0.496197	0.296565	82.7087
1	1008	24.6463	4.9383	0.0983953	0.481405	0.243097	80.2727
1	1054.5	50.0024	4.7874	0.102934	0.491652	0.279449	83.2851
1	1017.5	56.7876	4.72564	0.0993227	0.471211	0.283573	84.3341
1	1120	34.7915	4.47913	0.109328	0.489163	0.288217	72.3828
1	1180	36.3116	4.19867	0.115185	0.480993	0.30731	49.0842
1	1014	34.6121	4.56159	0.098981	0.453667	0.297794	57.1552
1	1172	29.3306	4.71973	0.114404	0.53548	0.275038	70.7434
1	1081.5	83.244	4.36053	0.10557	0.464091	0.301417	77.8161
1	1190	19.5149	4.5833	0.116161	0.532396	0.270626	86.0816
1	1283	27.2745	4.38878	0.125239	0.550197	0.28506	83.8067
1	895	21.3122	5.018	0.0873649	0.439579	0.260328	68.3846
1	1008.5	56.2014	5.1958	0.0984441	0.501709	0.266034	75.646
1	1117	35.8116	4.48639	0.109035	0.48527	0.277038	80.7815
1	1168.5	48.491	4.81665	0.114062	0.536626	0.294939	73.431
1	860	17.5147	5.14839	0.0839484	0.434391	0.232471	51.4483
1	907.5	22.2728	5.04534	0.0885851	0.440353	0.244082	83.7564
1	1088	44.4484	4.3262	0.106204	0.450441	0.259052	71.4185
1	1108.5	56.4753	4.71556	0.108206	0.505397	0.246611	63.5541
1	1151	22.0937	4.44512	0.112354	0.497982	0.294561	57.7486
1	1203	24.9088	4.52521	0.11743	0.52888	0.281296	83.8011
1	1278	17.5168	4.1015	0.124751	0.511553	0.282263	88.4895
1	1149.5	44.4701	4.26535	0.112208	0.477203	0.298895	78.4669
1	1185.5	22.0986	4.22068	0.115722	0.486915	0.287341	78.7243
1	1456	24.3706	4.0024	0.142127	0.567139	0.302105	79.2722
1	1301.5	15.6045	4.1842	0.127045	0.523879	0.288108	74.8037
1	929.5	50.5746	4.87707	0.0907326	0.442544	0.256514	72.6427
1	1219.5	28.7485	3.81088	0.119041	0.453644	0.301858	77.371
1	995.5	21.3767	4.75566	0.0971751	0.463442	0.265525	73.3037
1	1373.5	68.1952	3.75042	0.134073	0.502904	0.31176	70.5527
1	1408	13.0145	3.72389	0.137441	0.508838	0.334105	80.2353
1	1160.5	12.887	4.23835	0.113282	0.476719	0.304101	63.3652
1	1160.5	37.768	4.14303	0.113282	0.456552	0.308239	75.0566
1	1131.5	29.4441	4.45265	0.110451	0.491298	0.283006	77.0931
1	1207	56.5043	4.29518	0.117821	0.50601	0.288703	80.2866
1	1172.5	29.0825	4.57915	0.114453	0.524481	0.286072	69.6045
1	1145	28.9793	4.0413	0.111768	0.449936	0.319162	64.1453
1	1571	53.2769	3.96028	0.153352	0.607389	0.317773	81.0474
1	1463	45.6953	4.17744	0.14281	0.58381	0.304916	81.6544
1	1474.5	34.7509	3.83303	0.143932	0.550488	0.314457	74.2484
1	1002	47.9544	4.25864	0.0978096	0.414197	0.311706	67.6426
1	1294	15.0767	3.78416	0.126313	0.477617	0.331645	83.1176
1	1248.5	30.0248	4.66518	0.121872	0.56316	0.268072	82.2466
1	1335	30.2309	4.02232	0.130315	0.521838	0.305034	76.7905
1	1148.5	53.6073	4.38527	0.11211	0.489575	0.275546	66.8749
1	1161.5	18.2544	4.153	0.113379	0.470824	0.296036	66.3315
1	1139.5	34.301	4.80316	0.111232	0.523264	0.287584	71.8677
1	953.5	25.6395	5.12493	0.0930753	0.473282	0.253967	84.8905
1	1277	21.6565	4.39187	0.124654	0.5457	0.285595	84.9617
1	1088.5	33.0152	4.41948	0.106253	0.469024	0.266302	74.7301
1	1340	57.4438	4.23122	0.130803	0.553458	0.30168	77.6542
1	1025	17.1422	4.81401	0.100055	0.483008	0.239063	77.2095
1	1623	28.2159	3.8974	0.158428	0.614951	0.322151	79.9329
1	958.5	44.6253	4.76322	0.0935634	0.443602	0.264787	76.6551
1	1169.5	32.3788	4.27711	0.11416	0.482586	0.292452	76.8563
1	1455	43.7468	4.01847	0.142029	0.571036	0.305884	83.0085
1	1474	32.9741	3.73428	0.143884	0.536879	0.325141	84.3599
1	875.5	24.8305	4.68058	0.0854614	0.398822	0.263049	68.395
1	1118.5	16.8199	4.41159	0.109182	0.478496	0.284996	67.7919
1	1281	15.5858	4.29457	0.125044	0.53669	0.30105	67.6916
1	1392	30.9583	3.7141	0.135879	0.504064	0.3191	79.0774
1	1019	49.8293	4.60136	0.0994691	0.459492	0.277108	73.9599
1	1289	22.6922	4.50514	0.125825	0.566859	0.297297	73.8426
1	1436.5	42.6374	3.97622	0.140223	0.550267	0.30556	78.6894
1	1089	17.7229	4.42695	0.106302	0.470721	0.25764	52.3125
1	1092.5	32.2339	4.46745	0.106644	0.479495	0.288099	84.7124
1	1506.5	50.5246	3.92072	0.147056	0.575816	0.3211	77.9742
1	804	53.2194	5.56888	0.078482	0.433191	0.236652	73.4436
1	913.5	57.1841	4.63294	0.0891708	0.411053	0.269218	80.0562
1	1337	15.0674	3.94076	0.13051	0.514828	0.315116	56.5392
1	1260.5	28.6716	4.05877	0.123043	0.501267	0.32139	66.0049
1	1065	58.3658	4.3263	0.103959	0.444239	0.285329	82.952
1	1241	17.2965	4.09965	0.121139	0.504038	0.308664	62.434
1	1174.5	32.1253	4.39678	0.114648	0.506207	0.303393	72.0229
1	1184.5	58.0528	4.61439	0.115624	0.533484	0.263423	79.0596
1	1168.5	55.727	4.24495	0.114062	0.486236	0.28675	63.7831
1	1252.5	62.9221	4.08735	0.122262	0.495008	0.292684	54.502
1	1040	59.1159	4.43355	0.101519	0.45028	0.27886	59.1447
1	1308.5	45.4713	3.75976	0.127728	0.47766	0.318202	83.2874
1	989	25.8855	4.60769	0.0965406	0.444758	0.278455	80.4146
1	1056.5	21.7745	4.59352	0.10313	0.471007	0.278803	79.9181
1	1193	24.0102	4.1706	0.116454	0.490678	0.30985	78.2689
1	990.5	23.3951	4.61472	0.0966871	0.445878	0.260757	66.1836
1	932.5	38.6594	4.71172	0.0910254	0.430636	0.262006	84.1701
1	967.5	14.7394	4.72152	0.0944419	0.445747	0.263331	74.7816
1	1311.5	71.0889	4.04621	0.128021	0.516787	0.273988	68.6261
1	824	11.9348	5.22191	0.0804343	0.418298	0.243374	65.7282
1	1419	35.8829	4.14305	0.138515	0.573883	0.31426	69.9964
1	1312.5	52.3894	3.89982	0.128119	0.500314	0.334189	77.1248
1	1274.5	43.5068	4.36219	0.12441	0.535432	0.272111	85.5791
1	962.5	33.8438	5.28938	0.0939539	0.49124	0.253468	66.1083
1	976	51.7566	4.71145	0.0952717	0.451605	0.266711	84.2115
1	1444.5	29.7255	3.82072	0.141004	0.535214	0.300391	61.4343
1	1302.5	40.579	4.08919	0.127143	0.517764	0.330987	83.0793
1	933	12.9896	5.1986	0.0910742	0.473547	0.236905	76.4445
1	1036.5	31.4527	4.64061	0.101177	0.469709	0.24728	49.8809
1	1300	30.9954	4.69227	0.126899	0.580761	0.281648	73.9126
1	1053	18.5243	5.01082	0.102788	0.511139	0.263525	80.8193
1	988	17.3307	4.87535	0.096443	0.468473	0.261908	85.7874
1	1138	33.6573	4.48025	0.111085	0.498443	0.281271	77.0739
1	1151	62.6364	4.33753	0.112354	0.487286	0.269531	75.4516
1	1292	37.597	4.27974	0.126118	0.533198	0.289414	85.7122
1	1350.5	41.0567	3.67048	0.131828	0.478185	0.345219	83.0597
1	1429	30.5751	4.39793	0.139491	0.613575	0.263706	73.8051
1	1369.5	38.4445	4.25973	0.133683	0.56921	0.289356	84.8535
1	1214	54.8334	4.26704	0.118504	0.499401	0.314189	82.2532
1	1335	21.0378	3.99248	0.130315	0.521473	0.310261	66.9114
1	1077.5	43.2813	4.77029	0.10518	0.475008	0.265476	73.3631
1	1313	35.7391	4.09971	0.128168	0.525887	0.31633	90
1	1637	22.5415	3.63251	0.159795	0.580678	0.327473	79.2357
1	1218.5	42.4929	3.84688	0.118943	0.456714	0.321025	69.098
1	1072	40.6033	4.74822	0.104643	0.490557	0.273524	78.6051
1	1159.5	50.3787	4.38333	0.113184	0.496817	0.286836	82.8975
1	1070	25.4605	4.52118	0.104447	0.468186	0.273744	71.7085
1	1485.5	33.115	4.1002	0.145006	0.59433	0.299664	85.0443
1	1125.5	23.6616	4.19559	0.109865	0.45962	0.292653	70.3665
1	953	39.6107	4.978	0.0930265	0.46866	0.264539	61.9574
1	1144	22.0721	4.67137	0.111671	0.516085	0.290908	85.621
1	990	15.2417	4.55964	0.0966383	0.439114	0.287857	73.2007
1	1222.5	41.4695	4.38892	0.119334	0.524388	0.30489	75.2949
1	1449	36.9773	4.40248	0.141443	0.619429	0.30586	89.2678
1	1311.5	67.6635	4.21181	0.128021	0.536835	0.296256	66.9792
1	919.5	26.2904	4.41439	0.0897564	0.391278	0.288811	55.6933
1	1223	46.3414	4.17067	0.119382	0.493482	0.306461	86.5579
1	1115	54.6965	4.39929	0.10884	0.478881	0.309595	62.088
1	1125.5	44.8679	4.45034	0.109865	0.485367	0.287331	61.7517
1	1275.5	19.4743	4.06569	0.124507	0.499581	0.284466	81.2409
1	935.5	65.0429	4.74585	0.0913183	0.434271	0.25333	73.5323
1	1221.5	62.4605	3.96569	0.119236	0.472787	0.31862	83.2991
1	1063	19.0976	4.37241	0.103764	0.455862	0.2803	83.7289
1	1163	54.9214	4.64813	0.113526	0.527586	0.252714	83.4116
1	970	32.4281	4.61493	0.094686	0.434584	0.286878	80.2208
1	1150	29.6894	4.51508	0.112257	0.506954	0.271854	87.6382
1	1121	35.0271	4.48617	0.109426	0.489374	0.287829	65.3782
1	957.5	18.7048	4.84475	0.0934658	0.453274	0.258823	77.3022
1	990.5	25.5894	4.46867	0.0966871	0.431003	0.265074	76.2722
1	1100.5	19.804	4.34013	0.107425	0.467211	0.298604	83.9746
1	1154	48.8189	4.16523	0.112647	0.462006	0.289597	60.5865
1	1146	54.0307	4.05747	0.111866	0.452306	0.331595	61.9497
1	639	43.8873	5.55021	0.0623756	0.34628	0.268128	55.2097
1	937	15.7008	5.16927	0.0914647	0.472977	0.272911	81.9059
1	1414.5	61.0169	4.14969	0.138076	0.568952	0.303244	80.6618
1	1149	43.5068	4.5807	0.112159	0.507241	0.297926	69.3263
1	1068	34.7721	4.50463	0.104252	0.462216	0.282687	79.7412
1	1267.5	39.7227	3.9029	0.123726	0.477626	0.313424	75.0861
1	1439.5	51.7414	4.14997	0.140516	0.577011	0.427976	53.9075
1	1310	49.3578	3.84501	0.127875	0.491639	0.31865	68.1661
1	1009	70.7056	4.54461	0.0984929	0.445495	0.277973	51.0792
1	1215	27.6656	4.18447	0.118601	0.494562	0.299882	77.2912
1	1212	45.6259	4.31207	0.118309	0.511762	0.301272	70.4619
1	1614	64.5838	3.50696	0.15755	0.55229	0.32653	72.1814
1	1155	53.0668	4.18886	0.112745	0.472244	0.292602	39.7663
1	1435	19.8508	4.07469	0.140077	0.57078	0.302652	85.935
1	1457	21.658	4.02513	0.142224	0.571912	0.30441	77.6183
1	1020.5	17.6498	4.78613	0.0996155	0.47685	0.253451	63.3783
1	953	42.0054	5.24201	0.0930265	0.487858	0.248126	86.767
1	1177.5	60.5988	4.80332	0.114941	0.552128	0.283878	69.4875
1	1198	52.0783	4.48858	0.116942	0.522154	0.26227	84.0096
1	1420	44.4057	4.11013	0.138612	0.569296	0.281991	74.3611
1	1034.5	60.0767	4.34298	0.100982	0.437809	0.297001	58.021
1	1542	23.1541	4.01007	0.150521	0.603528	0.301379	82.729
1	1117	56.4758	4.63165	0.109035	0.502145	0.260719	73.8536
1	1160.5	34.071	4.17791	0.113282	0.473566	0.306916	57.1435
1	1167	33.9634	4.36452	0.113916	0.49544	0.289901	68.9752
1	1093	18.9926	4.11658	0.106693	0.437978	0.289561	83.5416
1	1203	36.0739	4.7505	0.11743	0.542249	0.263594	76.269
1	1276	36.6183	4.13661	0.124556	0.515333	0.28399	78.401
1	1487.5	19.3891	4.02854	0.145201	0.584546	0.297985	78.0479
1	1142	24.1753	4.44445	0.111476	0.49433	0.272448	80.2616
1	875	32.7122	4.82167	0.0854126	0.413948	0.271267	57.7738
1	884	50.1021	5.44076	0.0862911	0.469141	0.246867	53.8661

## Sheet: Col_hAT_B
Predicate	Pixel count	SSE	LS Ratio	Surface	Length	Width	Axes angle
1	1057.5	44.1269	4.38191	0.103227	0.453126	0.286196	55.5003
1	1259.5	29.1247	3.76822	0.122945	0.461633	0.299155	68.2453
1	1015.5	20.6005	4.55537	0.0991274	0.441241	0.267059	73.3665
1	1262.5	41.9489	4.05866	0.123238	0.498783	0.315601	73.3747
1	1577	37.5408	3.62943	0.153938	0.556754	0.344149	75.95
1	1007.5	18.3626	4.26043	0.0983465	0.417183	0.275207	72.8965
1	954	15.2499	4.66454	0.0931241	0.431476	0.267384	66.2817
1	1043.5	54.6671	4.54844	0.101861	0.449121	0.293278	78.9497
1	411	39.2742	9.44992	0.0401195	0.377974	0.201663	67.2769
1	992	28.8195	5.28758	0.0968335	0.496361	0.237232	84.2037
1	968	50.7489	5.10112	0.0944907	0.482202	0.237612	65.2801
1	1142	56.5191	4.69508	0.111476	0.528559	0.27337	80.5252
1	1206	48.7911	3.96694	0.117723	0.467027	0.284078	77.8968
1	705.5	19.0893	5.5656	0.068867	0.387551	0.235435	59.1545
1	1335	25.0685	3.78274	0.130315	0.492508	0.32237	56.3532
1	971.5	48.6889	4.64676	0.0948324	0.437314	0.245918	58.8934
1	1218	39.4295	3.97185	0.118894	0.469014	0.318593	80.7184
1	1126.5	22.15	4.63936	0.109963	0.510718	0.256779	82.0534
1	1325.5	27.8571	4.11339	0.129388	0.528676	0.311071	86.0478
1	1424	38.2596	3.9974	0.139003	0.548449	0.31029	82.3844
1	1087.5	63.0461	3.88925	0.106156	0.412491	0.314483	40.0416
1	814	34.1425	5.6663	0.0794581	0.450733	0.225566	78.873
1	1246.5	45.362	4.19646	0.121676	0.510137	0.318069	75.7364
1	1022.5	45.164	4.70862	0.0998107	0.470402	0.260893	71.664
1	811.5	21.2742	4.99876	0.0792141	0.391784	0.238997	86.9002
1	1065.5	53.0529	4.4913	0.104008	0.467225	0.259239	73.534
1	1026	60.252	4.70956	0.100152	0.470465	0.269376	63.2865
1	904	54.1113	4.64623	0.0882434	0.412243	0.292225	60.8014
1	925	28.405	4.77235	0.0902933	0.430559	0.262116	71.3336
1	911	16.0363	4.63453	0.0889267	0.409982	0.246395	70.7655
1	1143	57.5386	4.05266	0.111573	0.452665	0.313833	70.3962
1	872	10.4415	4.571	0.0851198	0.385636	0.276098	78.5514
1	951	30.9534	4.31478	0.0928313	0.400721	0.277882	38.6098
1	1103	50.7793	5.2204	0.107669	0.536273	0.227875	56.8058
1	1001.5	52.4621	5.26437	0.0977608	0.515037	0.222025	72.5145
1	1278.5	31.7779	3.83909	0.1248	0.479418	0.33234	80.0579
1	802	62.66	5.35946	0.0782867	0.404531	0.24905	63.9004
1	1127.5	15.7782	4.08836	0.11006	0.449834	0.27707	69.2505
1	973.5	42.2429	4.64569	0.0950276	0.441574	0.265317	80.28
1	1133	28.1813	4.42182	0.110597	0.491107	0.293901	64.9672
1	1526.5	37.6429	4.0563	0.149008	0.600539	0.303325	80.288
1	917.5	22.1983	5.22692	0.0895612	0.46637	0.25635	60.08
1	1090.5	29.8062	4.41117	0.106449	0.461585	0.299335	70.8026
1	1170	28.6383	4.47079	0.114209	0.506826	0.282589	69.0438
1	683	45.267	5.93693	0.0666706	0.394585	0.215255	50.6053
1	804	16.9281	4.88941	0.078482	0.386163	0.248571	76.4168
1	1034	50.0017	4.08813	0.100933	0.409907	0.293683	60.5076
1	868.5	21.0873	4.87453	0.0847781	0.41204	0.265057	65.4206
1	1065	56.2321	4.46133	0.103959	0.464694	0.302027	87.3674
1	1268.5	28.0808	3.87193	0.123824	0.479194	0.296893	80.2428
1	1177	14.8924	4.06449	0.114892	0.467088	0.293171	80.9106
1	886.5	25.1363	5.06669	0.0865352	0.437835	0.25886	62.4295
1	1224.5	35.1922	4.54511	0.119529	0.543071	0.275206	87.4336
1	1066	55.5298	4.3123	0.104057	0.450228	0.322042	66.0684
1	1410.5	30.8978	4.03807	0.137685	0.553192	0.312966	84.1641
1	1287	39.7624	3.94642	0.12563	0.490837	0.332492	49.5384
1	1243.5	48.2227	4.31451	0.121384	0.510643	0.271278	74.9065
1	977.5	22.4738	4.80873	0.0954181	0.464666	0.261643	88.5977
1	1078	22.3129	4.57501	0.105228	0.47785	0.286392	76.5864
1	1144	45.534	4.38171	0.111671	0.491294	0.265935	63.4124
1	1053	34.3941	4.44928	0.102788	0.452403	0.28775	58.8411
1	846.5	19.7381	5.50452	0.0826306	0.457803	0.250406	46.112
1	1322	45.2245	3.79001	0.129046	0.489393	0.362028	86.9318
1	808.5	15.3304	4.76875	0.0789212	0.377072	0.290517	58.6292
1	1415.5	21.6599	4.03996	0.138173	0.553733	0.309314	88.7575
1	906	40.8473	4.5692	0.0884386	0.4023	0.297931	84.0409
1	1118	26.4393	4.46095	0.109133	0.484507	0.311097	77.107
1	1248.5	56.1256	4.57784	0.121872	0.55867	0.297548	69.623
1	1250	21.2971	4.10644	0.122018	0.499161	0.315276	87.5249
1	1533	24.4846	3.77435	0.149643	0.561987	0.316832	78.8428
1	1025.5	48.5452	4.91519	0.100104	0.48352	0.274146	70.2305
1	1231	62.6232	3.91318	0.120163	0.467752	0.319727	67.6304
1	1319	42.1792	4.23152	0.128753	0.533233	0.312434	80.0069
1	1273	62.0842	3.92405	0.124263	0.486531	0.323523	61.1213
1	1065.5	47.104	4.67953	0.104008	0.491058	0.310122	72.5562
1	1383.5	34.1499	3.74903	0.13505	0.493147	0.330472	70.5859
1	907	20.4992	4.53852	0.0885363	0.40301	0.284916	82.9384
1	1082	24.0021	4.10292	0.105619	0.433181	0.303323	73.0678
1	876	23.1476	4.81262	0.0855102	0.405423	0.285312	76.5201
1	1297	24.1936	4.10016	0.126606	0.515325	0.298728	69.6467
1	1279	58.6351	4.01225	0.124849	0.497439	0.311336	58.9234
1	1109	31.1989	4.53445	0.108254	0.490278	0.272172	83.4009
1	1480	53.2782	3.75464	0.144469	0.545276	0.352586	67.1327
1	1279	29.5611	3.80855	0.124849	0.475006	0.290092	65.3793
1	921	22.718	6.21403	0.0899029	0.539512	0.228889	75.6622
1	1247	19.066	3.98397	0.121725	0.48487	0.30604	73.9475
1	991.5	22.4165	4.26577	0.0967847	0.412932	0.29102	77.957
1	1601.5	60.1778	4.04929	0.156329	0.61843	0.318614	82.9473
1	1227	13.4762	4.21768	0.119773	0.504382	0.293815	70.9417
1	1147	36.1156	4.4278	0.111964	0.495747	0.306192	69.9008
1	977	15.7582	4.67548	0.0953693	0.444213	0.269035	74.4119
1	1373	39.2448	4.04132	0.134025	0.540551	0.30234	72.933
1	889.5	20.8227	4.8574	0.086828	0.423262	0.267208	83.229
1	1297	11.1964	3.6997	0.126606	0.468317	0.312496	67.2478
1	852	60.9428	5.04584	0.0831675	0.416897	0.234533	71.8891
1	997	22.0776	4.30119	0.0973216	0.417034	0.295229	74.7109
1	1075	31.5588	4.39872	0.104935	0.460601	0.28889	61.0945
1	872.5	8.60747	4.53964	0.0851686	0.386142	0.253045	73.9973
1	1213.5	10.5632	4.08643	0.118455	0.48364	0.308456	75.4505
1	1351	23.3184	3.77396	0.131877	0.495506	0.309717	75.2411
1	767	24.8678	5.29787	0.0748702	0.397558	0.244534	76.0278
1	1150.5	34.2851	4.57184	0.112305	0.495605	0.266054	71.6988
1	1160.5	28.0514	4.35547	0.113282	0.494291	0.262823	67.4578
1	1088.5	7.88092	4.15311	0.106253	0.441286	0.28652	73.8645
1	1006	52.722	5.08956	0.0982001	0.490588	0.255979	72.4466
1	1595	59.8461	3.69797	0.155695	0.574862	0.325617	79.8911
1	1476	62.9642	4.07164	0.144079	0.582453	0.30697	72.1195
1	1126.5	12.6379	4.50654	0.109963	0.498933	0.311114	71.6796
1	1250	59.0417	3.98725	0.122018	0.4792	0.302069	76.2013
1	1230	19.0487	4.11685	0.120066	0.492663	0.30134	78.0599
1	1003.5	7.07081	4.56971	0.0979561	0.451133	0.294269	74.2936
1	1205.5	20.928	4.18324	0.117674	0.491325	0.285835	80.3568
1	1027.5	20.1041	4.26353	0.100299	0.42272	0.312084	66.818
1	1149.5	15.9236	4.4152	0.112208	0.49545	0.286577	77.3815
1	1017.5	50.1568	4.70544	0.0993227	0.451826	0.273147	76.4869
1	1301.5	25.8306	3.86658	0.127045	0.488819	0.305715	83.3954
1	1236	51.8667	4.18917	0.120651	0.505051	0.290298	77.0675
1	1378.5	10.9932	3.7503	0.134561	0.503614	0.333447	80.3469
1	1390	35.5361	4.02117	0.135684	0.546169	0.304926	68.5679
1	1422.5	30.8082	3.90578	0.138856	0.537324	0.34201	74.4085
1	1068	22.8891	4.20824	0.104252	0.437066	0.301917	41.4733
1	1029.5	35.9294	4.22566	0.100494	0.424562	0.30138	74.0238
1	650.5	40.7091	6.07263	0.0634982	0.382167	0.255224	82.1199
1	1329.5	43.652	4.38767	0.129778	0.569085	0.270462	72.2928
1	1290.5	58.2512	4.17134	0.125971	0.518836	0.32481	74.448
1	949	48.4229	4.68609	0.0926361	0.4347	0.290901	74.7607
1	1280.5	22.8885	4.17392	0.124995	0.518131	0.287118	78.8099
1	1519.5	36.6427	3.78624	0.148325	0.557264	0.329995	70.5857
1	1358.5	58.5572	4.18951	0.132609	0.55244	0.29254	81.0672
1	1390	34.7629	3.76888	0.135684	0.511646	0.323677	81.7206
1	970	24.0479	5.38059	0.094686	0.508893	0.250828	84.6941
1	1065.5	31.6556	4.11865	0.104008	0.425134	0.305418	54.915
1	865.5	18.5233	5.52792	0.0844853	0.467475	0.229868	76.7175
1	793	17.3812	5.00226	0.0774082	0.38722	0.254765	55.2448
1	1030.5	17.692	4.17793	0.100592	0.411411	0.286302	58.675
1	1076.5	27.0628	4.42475	0.105082	0.449981	0.290805	75.1924
1	1160	19.7815	4.4165	0.113233	0.499244	0.259395	77.5497
1	1121.5	46.1263	4.58759	0.109475	0.500595	0.26874	84.1751
1	1142.5	39.1407	4.40021	0.111524	0.492855	0.291704	72.0893
1	1438	63.9896	3.88988	0.14037	0.542579	0.31122	78.4836
1	1004.5	17.8353	4.4566	0.0980537	0.438994	0.292794	73.0532
1	1176.5	50.1193	4.55125	0.114843	0.521679	0.295462	71.5582
1	1162	24.3872	4.28249	0.113428	0.485478	0.282527	87.8648
1	1033	34.5795	4.05523	0.100836	0.407539	0.328763	43.4485
1	1081.5	17.2051	4.3773	0.10557	0.456689	0.268926	85.9938
1	1280.5	54.804	4.11656	0.124995	0.509649	0.296539	77.5847
1	920.5	49.5584	5.90171	0.0898541	0.488286	0.248544	58.2825
1	1107	26.3709	4.36966	0.108059	0.472621	0.30105	80.9454
1	903.5	14.9882	4.5838	0.0881946	0.403536	0.275317	75.172
1	1318	49.9245	3.8717	0.128656	0.480808	0.313431	57.3587
1	1204.5	27.4365	4.62779	0.117577	0.540381	0.283803	72.5313
1	1231.5	18.6217	4.155	0.120212	0.49823	0.293504	83.1022
1	1008.5	37.3543	4.69975	0.0984441	0.462527	0.237326	85.2613
1	1044.5	34.7638	4.24745	0.101958	0.428329	0.283925	72.8987
1	1022	34.3523	4.5555	0.0997619	0.420797	0.247878	59.8948
1	1441	38.1334	4.00248	0.140662	0.556513	0.330344	74.487
1	1396.5	19.4322	3.77851	0.136319	0.514948	0.311538	73.3788
1	1023.5	43.4649	4.59177	0.0999083	0.45675	0.289563	58.4928
1	960.5	8.07367	4.31248	0.0937586	0.401974	0.284956	75.0342
1	1393	27.8158	3.93969	0.135977	0.536152	0.320237	71.4076
1	1496.5	39.6521	4.25351	0.14608	0.607819	0.295605	87.5347
1	1153.5	72.6914	3.60924	0.112598	0.4052	0.309393	72.5805
1	1313	14.6065	4.10929	0.128168	0.523606	0.29254	74.2904
1	1157	45.0387	4.28576	0.11294	0.462813	0.315335	60.2494
1	962	12.6189	4.32176	0.0939051	0.400862	0.265059	76.956
1	912	39.1952	4.8368	0.0890243	0.430471	0.27003	80.6728
1	1359	54.1571	4.20557	0.132658	0.553352	0.27311	79.187
1	1097.5	46.7499	4.46665	0.107132	0.47	0.290102	76.5133
1	1209	16.3548	3.95541	0.118016	0.465505	0.286885	65.3653
1	1153.5	19.3283	3.98041	0.112598	0.446834	0.30751	79.5495
1	1292.5	49.4114	4.08958	0.126167	0.512938	0.302673	80.8907
1	1155.5	20.5657	4.05939	0.112793	0.454211	0.281991	62.8606
1	1138.5	42.8375	4.05319	0.111134	0.446258	0.327503	48.6409
1	859.5	60.4186	4.95281	0.0838996	0.413818	0.264714	79.185
1	1013.5	28.7909	4.24428	0.0989322	0.416862	0.289339	70.0212
1	1401	50.8364	3.95896	0.136758	0.541535	0.30199	81.4743
1	1280.5	17.1254	4.17159	0.124995	0.52125	0.291837	75.7295
1	1534.5	39.9741	3.93092	0.149789	0.580903	0.321582	76.4575
1	808.5	29.4667	5.09902	0.0789212	0.403206	0.254192	69.6689
1	907.5	32.7644	4.47949	0.0885851	0.396552	0.292998	80.3311
1	1417	25.7482	3.94682	0.13832	0.545594	0.2983	79.4812
1	1183	36.7747	4.10247	0.115478	0.47327	0.291991	70.5761
1	1175	31.36	4.23643	0.114697	0.482858	0.287841	56.5815
1	1156.5	20.9351	4.11367	0.112891	0.45874	0.300847	79.1233
1	1512.5	79.225	4.26006	0.147642	0.626404	0.306414	68.6458
1	793	28.6048	6.48661	0.0774082	0.501582	0.194406	72.3001
1	1312	37.5362	4.10028	0.12807	0.51626	0.304847	74.8078
1	1177	26.7524	4.28651	0.114892	0.49198	0.283716	82.2016
1	779.5	80.4094	5.5795	0.0760904	0.41612	0.22665	75.8553
1	1181	59.5693	4.59365	0.115283	0.52881	0.300108	82.4953
1	1691.5	34.812	3.62144	0.165115	0.595984	0.339972	82.8771
1	1032	25.3103	4.32323	0.100738	0.434383	0.28966	74.4124
1	1565	61.285	3.99988	0.152767	0.598313	0.317722	70.771
1	1228.5	12.4395	4.07325	0.119919	0.479878	0.315795	84.0344
1	1130.5	20.7893	3.96366	0.110353	0.436779	0.292595	72.8243
1	1318.5	18.7987	4.22566	0.128705	0.541293	0.279674	83.1703
1	793	46.5393	5.30103	0.0774082	0.410858	0.241589	65.8168
1	1047	73.5828	4.58669	0.102202	0.462325	0.26836	65.5903
1	1478	18.7565	3.51748	0.144274	0.50639	0.32237	74.4248
1	1427.5	13.4266	3.74221	0.139345	0.520831	0.325687	79.2639
1	1425.5	17.5608	3.65284	0.139149	0.506771	0.32475	74.3739
1	1201	29.5744	4.2161	0.117235	0.489695	0.294486	65.4631
1	1391.5	51.1404	3.97321	0.13583	0.539656	0.306362	77.1639
1	1334.5	26.4616	3.95073	0.130266	0.514641	0.29714	67.0947
1	1329	67.0896	4.37076	0.12973	0.563304	0.302836	84.734
1	1395	20.4983	4.02757	0.136172	0.546213	0.305217	82.2269
1	1329.5	15.1689	4.02936	0.129778	0.518762	0.306645	79.8698
1	1086	42.6116	4.93896	0.106009	0.520556	0.235309	75.6192
1	1266	27.2329	4.06593	0.12358	0.498594	0.300528	67.8756
1	1549.5	27.4825	3.89203	0.151254	0.585865	0.294791	78.4924
1	765.5	44.9226	6.76219	0.0747238	0.5069	0.252492	77.4444
1	1079.5	31.2632	4.23932	0.105375	0.443546	0.282	70.4189
1	865.5	49.4007	4.92118	0.0844853	0.414595	0.256974	61.7138
1	1188	18.1345	4.07836	0.115966	0.470403	0.31423	67.7513
1	1448.5	29.2189	3.88862	0.141394	0.549755	0.316557	73.7461
1	1276	40.1762	4.46624	0.124556	0.556581	0.294905	69.4171
1	1350.5	43.5289	3.76563	0.131828	0.495084	0.325787	79.941
1	1389.5	15.9567	3.64944	0.135635	0.495187	0.341424	70.7619
1	938.5	24.7684	4.92184	0.0916111	0.449567	0.244101	80.2333
1	1270	7.80652	4.16319	0.12397	0.516127	0.308754	87.7265
1	786	21.0364	5.22251	0.0767249	0.400674	0.224863	83.7776
1	1112	30.3456	4.18512	0.108547	0.45105	0.288713	69.8376
1	1079.5	17.4352	3.80759	0.105375	0.397926	0.30718	71.4549
1	1010	42.6251	4.75642	0.0985905	0.465727	0.279248	67.3282
1	703.5	38.0667	5.82838	0.0686717	0.400459	0.188947	72.0684
1	701.5	37.8102	5.8834	0.0684765	0.403164	0.180009	77.1651
1	1099	52.8964	4.25251	0.107278	0.452156	0.317504	68.6006
1	1563	36.1916	4.03052	0.152571	0.61029	0.318623	83.385
1	971	13.9785	4.7647	0.0947836	0.446027	0.271109	61.4695
1	1422	17.9523	3.74739	0.138808	0.519349	0.306919	85.8298
1	1033.5	15.8748	4.32583	0.100884	0.434022	0.29358	62.5512
1	1112	23.6908	4.38788	0.108547	0.479895	0.300812	68.4238
1	1063.5	18.9716	4.20962	0.103813	0.432862	0.304435	85.9011
1	1108.5	48.5925	4.73242	0.108206	0.502082	0.287211	63.3166
1	745	20.6834	5.4977	0.0727227	0.395085	0.226806	83.8178
1	1079	32.8382	4.30235	0.105326	0.451163	0.277337	86.5952
1	1759	32.3429	3.49321	0.171704	0.591887	0.354938	70.01
1	1119	15.5384	4.13455	0.109231	0.453201	0.315492	62.9233
1	1276	29.9161	4.03116	0.124556	0.502639	0.31783	66.9788
1	1009	33.7033	5.37697	0.0984929	0.529882	0.243817	79.2908
1	1244.5	59.6345	4.1581	0.121481	0.503944	0.282028	78.4819
1	970.5	35.7234	4.84545	0.0947348	0.460995	0.284466	71.7754
1	918	25.631	5.20977	0.08961	0.462362	0.251276	72.5611
1	1315.5	47.617	4.45357	0.128412	0.571035	0.275558	72.3954
1	789	27.3195	4.82629	0.0770178	0.371604	0.240804	65.4159
1	1157.5	50.8584	4.12919	0.112989	0.461405	0.28399	69.825
1	889.5	25.4225	4.70644	0.086828	0.403269	0.274765	67.9033
1	1352	49.7865	3.91613	0.131975	0.5146	0.299962	74.8705
1	733.5	14.5058	5.30678	0.0716002	0.376287	0.243341	64.6548
1	1165.5	27.3929	4.04151	0.11377	0.460802	0.289888	68.118
1	1087.5	43.275	4.66332	0.106156	0.496728	0.283217	67.5838
1	1009.5	25.1835	4.68617	0.0985417	0.46148	0.245002	73.9323
1	878	27.0119	4.59607	0.0857054	0.394171	0.285812	57.7565
1	1406	18.9772	3.82954	0.137246	0.524108	0.337043	79.3641
1	1088	18.8511	4.27465	0.106204	0.451024	0.293542	73.0266
1	929	13.8612	4.76803	0.0906838	0.432309	0.272213	74.6162
1	1218.5	48.3711	3.96188	0.118943	0.470687	0.333653	72.1178
1	1001.5	33.0082	4.62639	0.0977608	0.448483	0.277128	62.3771
1	1254	24.6909	3.98151	0.122408	0.487015	0.293754	87.8369
1	1096.5	16.3039	4.66896	0.107034	0.486753	0.271248	78.3246
1	1201	25.369	4.31385	0.117235	0.509979	0.294625	59.7349
1	1339	27.8624	3.90217	0.130706	0.507436	0.327414	83.6172
1	1561.5	43.8936	3.97745	0.152425	0.606233	0.311848	78.5933
1	913.5	20.4927	5.14679	0.0891708	0.458327	0.250164	71.5404
1	1427.5	33.2799	3.7091	0.139345	0.515713	0.319127	81.4519
1	1093.5	32.1528	4.24118	0.106741	0.444648	0.305752	54.5771
1	1513.5	45.0835	3.95451	0.147739	0.584216	0.31253	85.0319
1	1032.5	24.2282	4.5882	0.100787	0.462395	0.280487	81.323
1	1098.5	59.2697	4.29652	0.107229	0.456354	0.30291	68.5874
1	938	55.0365	4.42038	0.0915623	0.404372	0.288337	67.9662
1	1323.5	40.3853	4.02295	0.129193	0.519282	0.317506	68.0329
1	1079	14.8041	4.26415	0.105326	0.442344	0.282052	75.9619
1	1127	39.1085	4.31074	0.110011	0.470657	0.28285	71.7708
1	722	35.7114	5.14313	0.0704776	0.360851	0.254235	49.661
1	1503	64.6983	3.80115	0.146714	0.557203	0.318753	86.906
1	1051.5	17.0267	4.94271	0.102642	0.507741	0.264802	60.9339
1	1039	38.1194	4.86516	0.101421	0.46639	0.292637	57.511
1	1244	32.9068	4.06385	0.121432	0.493079	0.313199	66.586
1	753.5	58.0033	6.38401	0.0735525	0.463639	0.209773	81.6617
1	740	39.7067	5.79941	0.0722347	0.414971	0.234668	60.9521
1	979	15.832	5.1574	0.0955645	0.497929	0.222715	77.2383
1	1167.5	44.8028	4.42198	0.113965	0.504292	0.302895	86.942
1	616	20.893	6.11819	0.0601305	0.36776	0.196858	43.8623
1	579	40.3322	6.47011	0.0565187	0.366795	0.195451	30.1276
1	787	27.3915	5.64647	0.0768225	0.423245	0.217138	86.0022
1	1497.5	36.013	3.74436	0.146178	0.547096	0.340646	86.1795
1	1061.5	31.4879	4.50023	0.103618	0.463838	0.268074	81.1322
1	776	76.3018	5.38196	0.0757488	0.396726	0.190935	57.2273
1	1244.5	29.6	4.08822	0.121481	0.495464	0.286899	80.6747
1	1501	25.2652	3.81095	0.146519	0.56059	0.346727	63.3605
1	882	26.8372	4.82065	0.0860959	0.413286	0.279842	54.5322
1	1017.5	21.8611	4.74505	0.0993227	0.471901	0.270736	71.7965
1	1032.5	13.5883	4.74979	0.100787	0.478284	0.27456	68.5073
1	1150.5	36.3752	4.43839	0.112305	0.493007	0.31988	58.6418
1	1287.5	16.0374	4.01582	0.125679	0.5047	0.30261	82.0543
1	1343.5	60.6543	3.65039	0.131145	0.477574	0.324978	50.5135
1	1397	26.4464	4.01717	0.136367	0.546771	0.299418	71.4293
1	886.5	38.9008	4.971	0.0865352	0.398673	0.259973	70.5323
1	826	18.9079	5.57545	0.0806295	0.44934	0.23014	78.86
1	1286.5	21.2133	4.14267	0.125581	0.513581	0.297901	77.1109
1	971.5	15.6586	4.45135	0.0948324	0.418811	0.262586	72.3966
1	925.5	25.6321	4.36322	0.0903421	0.392072	0.287273	79.9734
1	835	28.8736	5.19009	0.081508	0.414397	0.250272	76.473
1	822.5	20.9099	6.02428	0.0802878	0.4727	0.233214	79.8818
1	927.5	13.969	4.50106	0.0905374	0.403096	0.273988	68.026
1	1046.5	13.7585	4.57275	0.102153	0.465729	0.276614	81.2687
1	932	10.4079	4.32257	0.0909766	0.389171	0.283151	54.5913
1	927.5	40.3586	4.82878	0.0905374	0.43741	0.265295	70.8462
1	1280	39.5251	4.05159	0.124946	0.506161	0.305454	82.2511
1	707	17.1067	5.35965	0.0690134	0.366635	0.240077	81.818
1	746.5	14.4162	5.59637	0.0728691	0.407814	0.23732	59.8531
1	1324.5	68.6087	3.81905	0.12929	0.488581	0.321986	76.0821
1	859	51.4425	5.39892	0.0838508	0.452769	0.227248	67.5075
1	792	18.0636	4.55705	0.0773106	0.352297	0.279125	73.9679
1	938	74.3771	5.83535	0.0915623	0.531486	0.247955	66.3354
1	962.5	17.6114	4.85234	0.0939539	0.453445	0.265598	76.8444
1	931	14.7528	4.22144	0.090879	0.381543	0.281909	46.8977
1	886	29.2501	4.83832	0.0864864	0.420283	0.258959	79.2093
1	936.5	46.6898	5.50542	0.0914159	0.502054	0.267385	69.6969
1	851.5	6.84822	4.62128	0.0831187	0.381629	0.26676	73.3008
1	1013.5	13.0318	4.2885	0.0989322	0.423739	0.291542	73.2483
1	1219.5	20.7462	4.08988	0.119041	0.486567	0.30718	70.675
1	784	6.40198	5.05841	0.0765297	0.373974	0.232972	79.6952
1	817.5	9.90723	5.10543	0.0797998	0.395874	0.242145	61.0693
1	770	29.2504	5.47354	0.0751631	0.411375	0.23922	82.4172
1	1462	55.8728	3.82622	0.142712	0.543163	0.326369	65.7325
1	888.5	39.6222	5.20619	0.0867304	0.449033	0.227776	73.605
1	384.5	24.9885	8.89785	0.0375327	0.324033	0.153247	85.2688
1	1096.5	29.6463	4.92453	0.107034	0.527689	0.277767	56.783
1	1067.5	36.8206	4.461	0.104203	0.464643	0.305639	78.693
1	1084	61.6648	5.30737	0.105814	0.559207	0.239263	81.4898
1	1015	51.3596	4.92604	0.0990786	0.488897	0.30093	60.1589
1	1255	37.6472	4.19578	0.122506	0.509784	0.292238	68.9263
1	851.5	8.77254	4.74959	0.0831187	0.388351	0.271411	69.7498
1	1031	8.74969	4.48595	0.10064	0.449469	0.282751	87.6024
1	1536	41.3212	3.81433	0.149936	0.572246	0.307234	65.2188
1	1004	18.9358	4.53615	0.0980049	0.442427	0.293287	75.7711
1	1078	28.2928	4.50124	0.105228	0.471401	0.291956	72.1716
1	1066.5	35.8874	5.14567	0.104106	0.535191	0.257245	72.2696
1	1144	24.2011	4.41345	0.111671	0.477857	0.280597	69.2823
1	997.5	48.5128	4.55014	0.0973704	0.443109	0.295941	43.8611
1	1141	29.0694	3.98777	0.111378	0.442269	0.320174	79.5436
1	786	26.1468	5.11032	0.0767249	0.387192	0.225682	48.4431
1	1174.5	31.9566	4.02916	0.114648	0.459927	0.319765	75.6161
1	1195	48.3055	4.16853	0.116649	0.481861	0.31151	63.7764
1	821	42.8703	5.02786	0.0801414	0.403103	0.265074	76.4612
1	1123	44.8115	4.16328	0.109621	0.456141	0.312567	69.7622
1	1373	81.2566	4.02459	0.134025	0.534407	0.283594	49.8314
1	1150	35.1023	4.5967	0.112257	0.500176	0.282261	64.7887
1	1158.5	23.2861	3.7339	0.113086	0.419457	0.30942	40.0785
1	1109.5	10.5303	4.23876	0.108303	0.454729	0.283048	70.4713
1	916.5	24.0556	4.65906	0.0894636	0.411518	0.238152	66.5454
1	830.5	14.6776	4.64701	0.0810688	0.375669	0.265046	78.1419
1	986	29.4355	4.64378	0.0962478	0.447785	0.298444	71.5402
1	1192	12.0307	4.08615	0.116356	0.474657	0.27763	85.2281
1	841.5	22.6199	4.78396	0.0821425	0.393045	0.269309	86.6062
1	971	15.1381	4.33376	0.0947836	0.411655	0.278207	85.5897
1	1407	40.4551	3.82112	0.137343	0.517093	0.3211	80.0547
1	1042	19.1947	4.41578	0.101714	0.448707	0.290508	72.2506
1	1013.5	47.9049	4.24521	0.0989322	0.42381	0.305016	65.7999
1	1295.5	21.7572	3.90884	0.126459	0.488712	0.306034	70.3622
1	1067	17.4763	4.272	0.104155	0.444755	0.300623	78.8184
1	1035	54.7206	4.23543	0.101031	0.431098	0.285515	61.5866
1	1284	43.3832	3.82441	0.125337	0.479156	0.323951	70.3751
1	1357.5	18.914	3.61152	0.132512	0.475902	0.351481	63.7774
1	983.5	28.2799	4.674	0.0960038	0.447718	0.269095	57.3678
1	1063.5	30.6813	4.45007	0.103813	0.454631	0.291043	53.2812
1	1018.5	30.5106	4.23219	0.0994203	0.42094	0.288055	47.5398
1	1174	22.0218	3.98956	0.114599	0.457348	0.307593	69.3247
1	1214.5	26.7013	3.86601	0.118553	0.458724	0.310296	76.6259
1	1222	10.0433	4.08032	0.119285	0.486978	0.320733	61.626
1	1267	51.488	4.1699	0.123677	0.515814	0.301831	81.4866
1	1067.5	49.7774	5.12437	0.104203	0.53389	0.190382	75.7769
1	1090.5	27.2126	4.17069	0.106449	0.448069	0.295406	63.8099
1	763.5	21.4722	5.59008	0.0745286	0.403153	0.211051	85.8268
1	1436	12.5866	4.09357	0.140174	0.565598	0.311458	81.8538
1	1068.5	44.6776	4.06507	0.104301	0.42413	0.307351	57.4974
1	1375	13.7295	3.99366	0.13422	0.528414	0.298596	72.4459
1	1677	45.5776	3.72379	0.163699	0.608556	0.331544	80.6749
1	1265.5	27.5442	4.07175	0.123531	0.501938	0.318795	61.2757
1	1133.5	25.5336	4.27996	0.110646	0.473519	0.278044	74.8262
1	944	25.33	4.94163	0.092148	0.445007	0.268019	72.0746
1	1146	47.2879	4.08616	0.111866	0.456917	0.322483	80.4161
1	918	11.9603	4.68464	0.08961	0.416003	0.257883	79.0646
1	988	12.3241	4.59597	0.096443	0.44524	0.290636	68.1726
1	1029.5	13.7284	4.96412	0.100494	0.498744	0.280233	68.2527
1	1425	15.7443	4.28767	0.139101	0.592904	0.303569	85.9848
1	1523	56.573	3.69399	0.148667	0.546441	0.34086	76.1826
1	966	44.5764	4.16398	0.0942955	0.392051	0.289917	79.6804
1	713	15.538	5.44252	0.0695991	0.381515	0.212698	84.2588
1	1104.5	52.1924	4.89787	0.107815	0.513748	0.267565	57.4435
1	1021	18.3847	4.10043	0.0996643	0.408923	0.292211	71.9751
1	647	7.18426	5.27042	0.0631565	0.332445	0.23582	53.2667
1	1174.5	13.6151	3.9385	0.114648	0.450522	0.301122	84.4717
1	856.5	16.5413	4.91339	0.0836067	0.409901	0.272905	44.7784
1	1326	35.0804	4.16867	0.129437	0.539518	0.32612	79.5742
1	1131.5	32.9533	4.33861	0.110451	0.481525	0.301668	73.3603
1	1291.5	24.9341	3.79451	0.126069	0.477511	0.311377	83.6164
1	1023	20.1702	4.39519	0.0998595	0.4381	0.283694	67.3558
1	570	36.1085	7.31288	0.0556402	0.401049	0.192772	86.1093
1	700	37.0301	5.92954	0.0683301	0.395714	0.237331	36.404
1	899	12.1507	5.32899	0.0877553	0.466911	0.23317	69.4088
1	1064	46.3155	4.80271	0.103862	0.498776	0.258771	82.2721
1	1112.5	26.1564	4.12227	0.108596	0.439069	0.311634	75.7596
1	1030	30.6074	4.36741	0.100543	0.4376	0.307609	36.0278
1	699.5	37.7418	6.4769	0.0682813	0.44341	0.243067	65.3981
1	657	9.02717	5.98453	0.0641327	0.384501	0.223413	82.3995
1	856.5	15.2232	5.03073	0.0836067	0.420631	0.263292	72.2337
1	896.5	37.2011	4.59084	0.0875113	0.396296	0.292238	69.9035
1	460	19.0112	8.66796	0.0449026	0.385571	0.168579	72.5864
1	1201	17.6204	4.30529	0.117235	0.499123	0.291537	81.3085
1	1085	15.9302	3.97954	0.105912	0.419949	0.296639	76.7686
1	1130	23.7938	4.07291	0.110304	0.448583	0.297619	83.4201
1	1372	28.492	4.1261	0.133927	0.542543	0.312271	83.785
1	1256	57.7074	4.33611	0.122604	0.530751	0.276827	78.7453
1	982	37.5824	4.47081	0.0958573	0.427936	0.277801	55.0162
1	979	46.477	4.52966	0.0955645	0.431379	0.261757	71.3182
1	1051	47.8738	4.3636	0.102593	0.449614	0.296577	55.3861
1	1209	46.0877	4.29262	0.118016	0.50396	0.304549	84.7477
1	1404	22.8204	4.56223	0.137051	0.623338	0.287847	75.6948
1	919	41.1592	4.82568	0.0897076	0.434488	0.261821	59.5774
1	906	58.8947	4.91477	0.0884386	0.431565	0.251849	32.2462
1	1119	24.6008	4.10875	0.109231	0.441879	0.304365	47.5793
1	880	14.6818	4.59638	0.0859007	0.392072	0.272177	53.0382
1	1140.5	43.798	4.07485	0.111329	0.449679	0.302742	61.943
1	1606.5	20.6712	3.59874	0.156818	0.563482	0.33624	67.5442
1	904.5	8.20937	4.45986	0.0882922	0.390963	0.273173	79.6866
1	971.5	27.8996	5.05444	0.0948324	0.457586	0.251162	67.3919
1	1336.5	51.7662	4.04293	0.130462	0.528254	0.331679	83.636
1	889	11.9981	4.56203	0.0867792	0.392321	0.260768	67.4315
1	945.5	33.5178	4.87282	0.0922944	0.450002	0.278798	66.2256
1	1231.5	15.537	4.13443	0.120212	0.487429	0.300775	73.03
1	923	24.6506	4.73265	0.0900981	0.428197	0.255061	83.9624
1	786	28.4672	5.39881	0.0767249	0.413779	0.24588	70.8857
1	1217.5	7.63472	4.26265	0.118846	0.504513	0.310712	84.3068
1	828	58.4229	5.52998	0.0808247	0.438366	0.232814	47.7264
1	704	10.6593	5.61678	0.0687205	0.38544	0.223217	79.3147
1	1094	13.7576	4.63454	0.10679	0.494467	0.271917	82.3767
1	986.5	61.7108	4.29514	0.0962966	0.413827	0.307561	44.212
1	679	29.3511	6.42215	0.0662802	0.42584	0.201606	84.4673
1	860	59.6412	5.05521	0.0839484	0.424741	0.271469	60.9086
1	1121.5	17.096	4.23802	0.109475	0.462873	0.294215	81.7015
1	1336	43.5913	3.88865	0.130413	0.507114	0.312689	79.4038
1	1285.5	51.6353	4.00307	0.125483	0.496735	0.292653	81.4729
1	1468	26.3334	4.16493	0.143298	0.593348	0.334096	76.1073
1	1368.5	31.8303	4.01765	0.133585	0.532249	0.295644	79.9145
1	1066.5	21.113	4.24053	0.104106	0.43798	0.311935	73.3622
1	1152.5	8.72884	4.2659	0.112501	0.478284	0.314429	59.9724
1	989	28.8472	4.62039	0.0965406	0.432175	0.2675	73.5659
1	1081.5	49.8996	4.44327	0.10557	0.462394	0.306695	50.0182
1	1080.5	72.2729	4.87102	0.105472	0.513816	0.268216	74.1672
1	972	21.7634	4.24148	0.0948812	0.399975	0.280343	63.677
1	1318	42.7757	3.94826	0.128656	0.505831	0.317652	83.1942
1	1142.5	73.8459	4.56254	0.111524	0.50963	0.293362	38.6631
1	1215.5	18.6205	4.32563	0.11865	0.51476	0.29587	73.852
1	934.5	25.6663	4.64672	0.0912207	0.423353	0.265256	70.2229
1	961.5	14.7473	4.68381	0.0938562	0.439046	0.281671	66.4117
1	1064.5	40.3395	4.5431	0.103911	0.465963	0.278935	74.6412
1	809.5	58.4826	5.68634	0.0790189	0.435495	0.240819	84.0279
1	1019.5	55.4302	4.49289	0.0995179	0.431404	0.221268	65.4836
1	1126	18.0483	3.92905	0.109914	0.431051	0.292133	73.1247
1	1163	53.0932	4.22548	0.113526	0.468765	0.288108	62.3206
1	859	8.68983	4.32763	0.0838508	0.362912	0.275399	82.63
1	1390	36.4468	3.91742	0.135684	0.526273	0.329219	70.1048
1	1527.5	50.3467	4.08312	0.149106	0.603216	0.325366	89.2383
1	1065	19.8698	4.64453	0.103959	0.480939	0.283694	74.0586
1	1103.5	50.0813	4.56825	0.107717	0.491888	0.289477	60.9668
1	1318.5	22.3883	3.94973	0.128705	0.498966	0.302001	68.0916
1	1197	16.5968	4.38201	0.116844	0.511565	0.297832	73.4891
1	1191.5	77.4773	4.14384	0.116308	0.480629	0.306681	71.127
1	988	36.7856	4.85973	0.096443	0.474451	0.249902	77.9416
1	896.5	9.14603	4.88542	0.0875113	0.429567	0.260328	81.4789
1	1078	18.6457	3.99273	0.105228	0.419297	0.32362	64.5057
1	1084	17.9933	4.40658	0.105814	0.464096	0.260682	83.5141
1	837	15.5907	5.14805	0.0817033	0.421781	0.261908	70.6612
1	955	34.1911	5.14698	0.0932218	0.481086	0.265453	68.2253
1	1286	23.8086	3.99301	0.125532	0.501031	0.301502	67.1468
1	1214.5	42.4935	3.9739	0.118553	0.463658	0.307276	70.0427
1	1341.5	19.7748	3.77109	0.13095	0.490105	0.325811	65.9521
1	1155.5	28.2504	3.91942	0.112793	0.442128	0.333353	65.1104
1	874.5	21.8835	5.07444	0.0853638	0.435995	0.258109	59.7369
1	1318	21.4828	4.10091	0.128656	0.525127	0.2946	69.9395
1	1083.5	7.39909	4.24336	0.105765	0.448694	0.288708	82.2968
1	774	30.0722	5.47746	0.0755535	0.407881	0.237232	67.0099
1	1535	42.8931	3.65532	0.149838	0.546989	0.32101	74.1264
1	850.5	50.421	4.81784	0.083021	0.399975	0.276724	70.1536
1	1190	35.3891	3.97415	0.116161	0.454817	0.316089	64.6649
1	1424	28.8918	3.80657	0.139003	0.524639	0.327587	71.4924
1	1152	30.0633	4.33726	0.112452	0.485662	0.304191	56.4918
1	881.5	21.882	4.69664	0.0860471	0.404218	0.277496	45.467
1	788	24.2991	5.114	0.0769201	0.393011	0.260089	67.094
1	1403	37.1628	3.66215	0.136953	0.493693	0.343186	84.1131
1	857	43.9018	5.26404	0.0836555	0.439897	0.239067	76.7175
1	1311.5	13.9626	4.1134	0.128021	0.518443	0.29344	82.0724
1	733.5	12.3685	5.55223	0.0716002	0.397534	0.234702	71.0379
1	1316.5	28.4562	4.37816	0.128509	0.553503	0.304594	78.9862
1	443.5	49.7627	7.28733	0.043292	0.315195	0.202081	52.2328
1	1064.5	22.5738	4.43749	0.103911	0.462386	0.287472	62.223
1	754.5	20.7225	5.65872	0.0736501	0.422125	0.231843	78.237
1	1116.5	26.0624	4.15755	0.108986	0.453021	0.268449	71.1501
1	1361	43.7603	4.01306	0.132853	0.53295	0.30134	79.1856
1	686	32.3151	6.1111	0.0669635	0.412424	0.230495	77.2384
1	628	58.609	6.3104	0.0613018	0.387401	0.235356	69.0678
1	1036	22.1603	4.19721	0.101129	0.422214	0.280345	66.6415
1	1037.5	43.4106	4.28691	0.101275	0.428462	0.29146	57.5837
1	1148	13.4699	4.04245	0.112061	0.452964	0.300829	74.6897
1	1129.5	19.4006	4.31537	0.110255	0.474601	0.297832	76.1756
1	594	26.9857	7.87874	0.057983	0.442206	0.203096	62.8706
1	968.5	54.5726	5.12644	0.0945395	0.470484	0.270856	61.1452
1	1170.5	25.6417	4.05323	0.114258	0.464005	0.338806	57.2022
1	913	25.8608	4.59199	0.0891219	0.41195	0.264961	54.5452
1	1172	21.8088	4.08581	0.114404	0.46642	0.306227	85.5951
1	1008.5	37.0609	5.0215	0.0984441	0.490802	0.24128	78.9172
1	1217	20.0087	4.14334	0.118797	0.472117	0.3071	69.6551
1	821.5	17.4209	5.00127	0.0801902	0.403391	0.264644	51.2044
1	1202	34.2152	4.1843	0.117333	0.487927	0.30259	67.9877
1	1130.5	36.6786	4.19501	0.110353	0.462513	0.281213	80.8527
1	1155	18.4717	4.18348	0.112745	0.471371	0.282372	62.1841
1	816	42.3887	4.5457	0.0796533	0.361657	0.272185	55.6142
1	1195.5	25.0023	4.19083	0.116698	0.487372	0.267155	59.3088
1	795.5	37.2427	6.03052	0.0776523	0.472272	0.205297	63.4156
1	1351.5	11.3013	3.77836	0.131926	0.49804	0.319237	65.8185
1	1185	9.99297	5.07947	0.115673	0.584926	0.272182	74.3333
1	1025.5	19.9013	4.65748	0.100104	0.466435	0.279265	80.45
1	845.5	38.563	5.27965	0.082533	0.435584	0.246982	80.5846
1	1114	30.2709	4.26947	0.108742	0.464479	0.302602	81.9141
1	1052.5	18.8399	4.30883	0.102739	0.444688	0.306439	81.3946
1	1109	44.7169	4.24931	0.108254	0.461989	0.308969	69.9401
1	1154.5	25.3345	4.24162	0.112696	0.476226	0.322785	78.3284
1	1087.5	38.6801	4.36069	0.106156	0.462007	0.301767	59.4577
1	709.5	25.9263	6.91099	0.0692574	0.467997	0.201247	74.8996
1	1222	25.1615	3.95317	0.119285	0.47138	0.29674	56.7628
1	1043.5	13.7659	4.61682	0.101861	0.47194	0.289901	78.8755
1	1280.5	39.9305	3.95226	0.124995	0.494064	0.312999	56.9587
1	1103	19.1699	4.25713	0.107669	0.459375	0.293171	78.2478
1	961.5	56.5782	4.93882	0.0938562	0.459363	0.283358	53.8421
1	1112	34.1268	4.60968	0.108547	0.500123	0.317163	57.4712
1	1286.5	25.7175	3.88177	0.125581	0.487178	0.308456	73.5613
1	826	39.1604	4.88469	0.0806295	0.387978	0.26032	81.0093
1	1097.5	27.4299	4.51956	0.107132	0.479352	0.280057	81.5708
1	794.5	20.0967	4.59538	0.0775546	0.356035	0.281349	51.8997
1	996.5	50.0601	4.38601	0.0972727	0.424188	0.28766	71.938
1	986.5	14.7128	4.7411	0.0962966	0.456967	0.279159	88.0386
1	1199.5	17.1072	4.22607	0.117088	0.487999	0.29065	74.3316
1	951	9.25773	5.13434	0.0928313	0.474202	0.25918	69.7342
1	1241.5	35.7745	3.91182	0.121188	0.473303	0.303336	69.0796
1	1203.5	23.6142	3.99736	0.117479	0.469718	0.29843	79.7337
1	1017	32.2861	4.54333	0.0992738	0.44761	0.286259	68.8757
1	1017.5	48.1163	3.99911	0.0993227	0.392569	0.310158	60.1207
1	978.5	17.3648	4.70172	0.0955157	0.44085	0.25928	72.3073
1	605	15.6938	5.74938	0.0590567	0.335217	0.225517	56.3041
1	1076	47.3775	4.51305	0.105033	0.478531	0.281078	74.5172
1	1274	24.9925	4.28201	0.124361	0.528877	0.30375	84.0486
1	1406.5	31.5599	3.86222	0.137295	0.528053	0.320882	82.3175
1	781.5	53.6259	6.29235	0.0762857	0.480637	0.179878	80.412
1	972.5	9.54632	4.66065	0.09493	0.442483	0.274394	79.0696
1	788.5	23.7985	5.08871	0.076969	0.379413	0.253541	68.1799
1	1184	26.4453	4.23717	0.115575	0.489915	0.297906	77.3535
1	1170.5	21.5439	4.10311	0.114258	0.465271	0.316442	67.9378
1	1186	54.2996	4.40709	0.115771	0.477106	0.27903	66.1257
1	652.5	16.8934	5.47608	0.0636934	0.349148	0.240106	75.795
1	1232	31.0901	3.805	0.120261	0.45505	0.329782	71.3034
1	1212.5	65.1101	4.4948	0.118357	0.519774	0.28451	69.5617
1	1148.5	74.8682	4.13776	0.11211	0.464368	0.304302	42.2062
1	1393.5	23.5021	4.12976	0.136026	0.557891	0.293398	81.1353
1	883	20.4097	5.62638	0.0861935	0.484991	0.251177	61.4535
1	1273	22.7645	4.06924	0.124263	0.504025	0.30257	66.0133
1	978.5	39.6799	4.70709	0.0955157	0.453031	0.274382	77.8477
1	1123.5	24.437	4.51945	0.10967	0.495496	0.299817	70.4167
1	1063	20.0853	4.43134	0.103764	0.459458	0.260021	73.5519
1	1450	20.5331	3.76541	0.141541	0.524639	0.307405	70.567
1	859	22.5252	4.75447	0.0838508	0.399246	0.284116	70.8529
1	1064.5	28.5193	4.50292	0.103911	0.467492	0.275614	74.2682
1	755	54.5243	5.35773	0.0736989	0.396443	0.219728	73.2436
1	849	37.7506	5.23783	0.0828746	0.434149	0.259776	52.3236
1	1269.5	60.1957	3.77574	0.123921	0.467702	0.348253	68.0429
1	1090	17.4452	4.38385	0.1064	0.46369	0.290845	81.9481
1	1036	12.4705	4.29216	0.101129	0.433697	0.285274	70.3953
1	1276	32.5544	4.13007	0.124556	0.513911	0.310136	71.7575
1	797	56.6061	5.952	0.0777987	0.455709	0.209732	67.907
1	1261.5	41.4717	3.94975	0.123141	0.482032	0.299953	80.4732
1	1321.5	39.5514	3.89016	0.128997	0.505289	0.319525	78.5687
1	1420.5	27.2221	3.81468	0.138661	0.526726	0.317308	75.7424
1	953.5	36.261	4.90025	0.0930753	0.453039	0.30261	40.8605
1	753	31.2502	5.5918	0.0735036	0.410998	0.256238	54.133
1	1280	16.8773	3.97757	0.124946	0.49253	0.300847	83.3536
1	1075	18.6622	4.29838	0.104935	0.449228	0.323156	60.0277
1	1241.5	22.3702	4.00502	0.121188	0.485173	0.30134	78.9283
1	1085	20.7898	4.0091	0.105912	0.425146	0.324177	63.1749
1	1501.5	17.7608	3.74034	0.146568	0.547152	0.332105	75.6728
1	1481.5	55.0541	3.95526	0.144616	0.559794	0.303501	62.3039
1	952	38.1422	4.40919	0.0929289	0.409022	0.279861	78.3405
1	880.5	23.9339	4.56582	0.0859495	0.391314	0.251574	82.3262
1	824	19.0604	4.85447	0.0804343	0.392147	0.240158	73.2295
1	1165.5	24.0006	4.08845	0.11377	0.458015	0.314529	50.9339
1	1049	18.434	4.14953	0.102398	0.424501	0.276296	83.5657
1	960	47.1459	4.83375	0.0937098	0.451995	0.253967	51.5157
1	1658.5	25.0326	3.78222	0.161893	0.613323	0.335482	82.536
1	1259.5	29.8868	4.25096	0.122945	0.518486	0.278684	74.6594
1	1256	15.3866	4.0608	0.122604	0.495322	0.295746	75.8
1	1317	26.7585	4.31916	0.128558	0.553854	0.271795	78.5003
1	1201.5	64.1282	4.16115	0.117284	0.487874	0.290092	83.2117
1	1133	47.2634	4.77971	0.110597	0.518734	0.237208	75.3255
1	1409.5	46.5015	3.98029	0.137587	0.53991	0.330554	76.2072
1	861	14.0935	4.98812	0.084046	0.419778	0.252953	75.0613
1	723	40.1944	5.42617	0.0705752	0.3845	0.258125	61.7914
1	1064.5	42.4362	5.15676	0.103911	0.527355	0.236958	67.3178
1	1246.5	40.0263	4.31691	0.121676	0.525207	0.291052	66.221
1	999.5	16.009	4.61093	0.0975656	0.444094	0.279086	62.7947
1	764	22.205	5.10093	0.0745774	0.382892	0.257176	62.3298
1	1343.5	11.0098	3.85423	0.131145	0.504984	0.309361	68.8679
1	1339.5	20.5508	4.28516	0.130754	0.560172	0.299936	73.2294
1	1282	18.8521	4.24115	0.125142	0.52932	0.276869	72.8104
1	1303	20.2507	3.98101	0.127192	0.506356	0.28192	83.627
1	1275	44.0791	4.31411	0.124458	0.536869	0.284341	66.1845
1	1022.5	12.5927	4.50804	0.0998107	0.449023	0.252335	78.1559
1	1240.5	31.3208	4.32298	0.121091	0.521999	0.296811	76.3926
1	1056.5	29.0647	4.60403	0.10313	0.4746	0.272975	74.1825
1	969	28.8473	4.38786	0.0945884	0.412854	0.28313	55.5083
1	1333.5	20.2435	3.97211	0.130169	0.516169	0.311149	76.1425
1	1155	49.0395	4.0295	0.112745	0.45257	0.331791	71.5901
1	803	23.9112	5.45186	0.0783844	0.41487	0.263144	49.5664
1	1173.5	39.5138	4.46732	0.11455	0.508436	0.286224	85.9233
1	1165	43.5457	4.33861	0.113721	0.487808	0.265158	62.6828
1	975	18.2381	4.57685	0.095174	0.434516	0.288884	77.4129
1	1289	63.2044	3.79424	0.125825	0.470774	0.303115	73.2265
1	1265.5	35.0433	3.9998	0.123531	0.49434	0.311588	79.7038
1	1001	27.5972	5.01836	0.097712	0.460675	0.238938	72.4783
1	1352	25.7707	3.9474	0.131975	0.520687	0.299837	76.8078
1	1032.5	10.9437	4.22569	0.100787	0.425131	0.270014	85.3072
1	1130.5	30.7762	4.46115	0.110353	0.492221	0.289145	56.4083
1	967	27.4921	4.58662	0.0943931	0.433457	0.268395	64.4292
1	963.5	30.65	4.60146	0.0940515	0.431547	0.258981	84.3548
1	1363	29.5307	3.75068	0.133048	0.499178	0.304593	65.3882
1	1076	17.7364	4.23865	0.105033	0.442911	0.283868	68.2236
1	1152.5	14.4893	4.16116	0.112501	0.466739	0.276245	77.2001
1	1219.5	54.392	3.97405	0.119041	0.468865	0.305072	74.489
1	701.5	43.6905	6.67326	0.0684765	0.443002	0.190994	58.8161
1	1427	31.5867	3.74184	0.139296	0.522133	0.312836	60.0127
1	872.5	43.668	5.2441	0.0851686	0.446716	0.203498	72.346
1	1056.5	28.9789	4.31811	0.10313	0.444234	0.271334	70.3964
1	1438.5	37.5592	3.64949	0.140418	0.510864	0.3335	76.2667
1	981	35.34	4.76366	0.0957597	0.456335	0.280517	78.4687
1	1072	62.437	4.21724	0.104643	0.440491	0.291542	49.4209
1	1034	26.9928	4.35733	0.100933	0.430922	0.283898	81.2038
1	1105	38.7012	4.05307	0.107864	0.43923	0.312824	28.4645
1	926	15.2092	4.44457	0.0903909	0.401446	0.252749	65.8482
1	1091.5	10.7179	4.10819	0.106546	0.435677	0.28158	77.4592
1	1151	19.0269	4.0717	0.112354	0.454835	0.30134	70.6989
1	1423	68.986	4.14358	0.138905	0.573376	0.311415	70.9734
1	1321	38.5928	4.35538	0.128949	0.561584	0.273624	86.5632
1	1286.5	62.6186	4.33714	0.125581	0.544783	0.303675	75.8123
1	1099.5	48.8743	4.70626	0.107327	0.507491	0.270271	72.5763
1	1000	25.2819	4.91528	0.0976144	0.462337	0.273483	43.2291
1	1401	30.3229	3.85111	0.136758	0.525685	0.30662	78.0188
1	1010.5	17.4184	4.08069	0.0986394	0.402571	0.290137	75.7419
1	990	38.6879	5.15837	0.0966383	0.501967	0.255056	75.4571
1	997.5	63.5847	4.59041	0.0973704	0.448674	0.289206	71.3146
1	1198	18.8129	4.156	0.116942	0.48577	0.306671	56.2802
1	1425	42.9441	3.93365	0.139101	0.543474	0.319852	73.0022
1	1010	33.9198	4.72553	0.0985905	0.468747	0.274818	73.3385
1	1237.5	27.3839	3.94408	0.120798	0.476159	0.320882	52.9002
1	1134	39.4668	4.51173	0.110695	0.496414	0.275317	87.6175
1	919.5	43.1541	4.82052	0.0897564	0.425094	0.266307	77.0323
1	1299.5	45.8083	3.96795	0.12685	0.50319	0.263631	56.4168
1	871.5	9.246	5.20031	0.0850709	0.444437	0.243115	79.5097
1	924.5	20.8238	5.37578	0.0902445	0.476533	0.23988	80.4434
1	1087.5	70.0569	4.83413	0.106156	0.522113	0.296485	58.4391
1	929.5	38.552	4.76827	0.0907326	0.434044	0.248254	67.832
1	1325.5	23.102	3.86401	0.129388	0.494134	0.293013	69.5577
1	1016.5	19.4937	4.14164	0.099225	0.40912	0.29648	80.1457
1	902.5	34.7502	5.28209	0.088097	0.463961	0.230436	85.7389
1	1417.5	56.9728	3.70809	0.138368	0.499903	0.316257	75.3607
1	1133.5	27.7308	4.3251	0.110646	0.478567	0.266283	86.493
1	971.5	24.4497	4.46281	0.0948324	0.418278	0.273483	74.4802
1	991.5	43.8281	4.41797	0.0967847	0.427791	0.27889	59.8838
1	1134	30.4603	4.17927	0.110695	0.45984	0.310261	69.0532
1	1282	36.905	3.88691	0.125142	0.4821	0.312445	71.6024
1	866	44.1228	5.18669	0.0845341	0.438391	0.220924	70.8509
1	1076	55.2665	3.92306	0.105033	0.411295	0.323457	50.5081
1	1036	62.8866	4.70974	0.101129	0.475566	0.271311	68.9423
1	1107.5	42.3698	4.40321	0.108108	0.464954	0.291127	77.2307
1	1327.5	55.0152	4.02567	0.129583	0.516799	0.31375	72.63
1	1173.5	35.3148	4.24343	0.11455	0.486164	0.301315	67.2211
1	829.5	13.4179	4.9067	0.0809711	0.39911	0.253268	77.0522
1	779.5	11.3573	4.49975	0.0760904	0.3405	0.257475	54.6902
1	1383.5	9.6646	4.13852	0.13505	0.558751	0.304631	86.3232
1	1213.5	20.0065	4.10313	0.118455	0.486052	0.304828	74.9169
1	709	14.3932	5.2668	0.0692086	0.358556	0.235808	71.8783
1	1179.5	31.4161	4.41498	0.115136	0.502311	0.29096	79.8598
1	957.5	39.1922	4.33265	0.0934658	0.404823	0.275248	51.8288
1	909	62.759	4.92403	0.0887315	0.435336	0.258284	77.5159
1	1219.5	22.8192	4.04759	0.119041	0.480778	0.311442	74.7253
1	1051.5	41.2551	4.37456	0.102642	0.447797	0.318337	75.4629
1	735	7.83501	5.06256	0.0717466	0.359707	0.241806	70.3743
1	990	32.4317	5.09996	0.0966383	0.493085	0.271917	83.0133
1	1476.5	61.1982	3.92658	0.144128	0.566408	0.323829	74.5181
1	1095.5	14.6607	4.21431	0.106937	0.451028	0.294343	84.8785
1	1078.5	25.0587	4.59783	0.105277	0.485329	0.31016	65.9426
1	819.5	14.8587	4.78721	0.079995	0.381833	0.24873	64.7105
1	1545.5	51.8261	4.01488	0.150863	0.605211	0.299327	87.1582
1	1424.5	40.9696	3.93258	0.139052	0.545641	0.318033	77.9407
1	1213.5	59.4895	4.39491	0.118455	0.522392	0.290009	70.4062
1	911	25.4723	4.93203	0.0889267	0.435209	0.258632	85.5879
1	1324.5	27.427	4.02916	0.12929	0.51896	0.293317	73.9745
1	946	45.5463	5.5205	0.0923432	0.510315	0.270093	82.2451
1	1011	25.3912	4.57994	0.0986882	0.44922	0.301969	54.4929
1	906.5	46.12	4.45712	0.0884875	0.39414	0.257245	78.0624
1	1284.5	27.7452	4.48275	0.125386	0.548916	0.297363	72.4121
1	1336.5	19.2252	3.92995	0.130462	0.503896	0.308618	86.0389
1	925	20.3556	4.3679	0.0902933	0.384902	0.282998	71.5593
1	1036.5	25.4923	4.70838	0.101177	0.476419	0.283412	71.2105
1	1162.5	25.8213	4.12997	0.113477	0.468589	0.276096	79.7506
1	1270	46.3304	4.09283	0.12397	0.503026	0.331884	78.5158
1	1087.5	19.3772	4.65054	0.106156	0.490731	0.27484	78.0955
1	1283.5	25.3647	4.07829	0.125288	0.510755	0.29587	68.0884
1	1300	24.8574	3.81995	0.126899	0.483613	0.328592	64.9642
1	757	19.3702	4.90128	0.0738941	0.360778	0.244506	71.2178
1	1025.5	45.6162	4.949	0.100104	0.495143	0.264334	52.7934
1	1131	12.2783	4.34085	0.110402	0.47716	0.29225	81.3436
1	1215.5	14.1124	3.8451	0.11865	0.455311	0.307174	59.7363
1	1011	18.3605	4.57607	0.0986882	0.449228	0.291883	62.5975
1	1354.5	10.3322	3.83769	0.132219	0.505397	0.329879	76.9877
1	1439	42.6442	3.79891	0.140467	0.533118	0.343875	81.4763
1	1036	29.8858	4.66668	0.101129	0.47063	0.271686	78.1652
1	1388.5	38.0707	3.89586	0.135538	0.526555	0.327507	74.8298
1	980.5	18.9691	4.71089	0.0957109	0.450398	0.288054	73.236
1	1245.5	34.0228	4.25354	0.121579	0.514902	0.288172	75.3627
1	1597	37.0845	3.79221	0.15589	0.587894	0.325242	80.3331
1	973.5	34.9689	4.79096	0.0950276	0.446133	0.261205	67.0409
1	1226.5	36.9269	3.78987	0.119724	0.449002	0.314596	82.4413
1	1204	36.3935	4.04272	0.117528	0.47442	0.306803	68.9399
1	1404.5	37.0784	3.92764	0.137099	0.538722	0.305801	79.5803
1	755.5	14.648	5.88529	0.0737477	0.434076	0.216615	86.4065
1	917.5	58.859	4.18469	0.0895612	0.374097	0.291667	61.2938
1	1229.5	68.7781	4.12755	0.120017	0.492653	0.310841	73.5198
1	1316.5	30.9169	3.87263	0.128509	0.495366	0.315935	80.5114
1	980.5	7.16056	4.43065	0.0957109	0.424069	0.266027	75.4169
1	1032	35.3076	4.34564	0.100738	0.44024	0.303956	69.6132
1	1294	14.7406	4.06283	0.126313	0.509053	0.292988	78.5056
1	1252.5	28.7602	4.07576	0.122262	0.497753	0.293006	78.9308
1	1026.5	50.1146	3.88996	0.100201	0.389792	0.315038	26.8367
1	912	18.8222	4.75195	0.0890243	0.420328	0.262531	82.5141
1	1182.5	52.2074	3.94399	0.115429	0.455426	0.337151	70.1981
1	1172	46.4517	4.41882	0.114404	0.509276	0.305082	71.8372
1	1005	49.2253	4.93693	0.0981025	0.475954	0.246738	76.8192
1	1135.5	28.5936	4.68264	0.110841	0.490277	0.285451	70.7982
1	1232.5	8.26629	4.05911	0.12031	0.485126	0.297983	69.0665
1	1364.5	59.285	3.99619	0.133195	0.532306	0.315127	75.4352
1	1109	31.654	4.18938	0.108254	0.454088	0.30427	77.4912
1	1320.5	65.5377	4.5141	0.1289	0.579904	0.299773	43.7003
1	1300	20.2642	3.96524	0.126899	0.498132	0.313815	73.865
1	1233	37.548	4.0734	0.120359	0.479844	0.30628	77.8367
1	990	52.8879	4.45896	0.0966383	0.431369	0.298355	60.5084
1	1189.5	59.3343	3.97265	0.116112	0.46035	0.327343	67.3913
1	1041.5	47.7898	4.9374	0.101665	0.50222	0.268359	52.9013
1	794.5	72.5433	5.70496	0.0775546	0.438973	0.255322	60.7472
1	766	55.0744	5.68209	0.0747726	0.420646	0.19541	68.1446
1	886	30.2995	4.84279	0.0864864	0.419879	0.281008	86.1479
1	1153.5	25.2474	4.17569	0.112598	0.469726	0.323829	65.9773
1	1363	48.1327	3.96005	0.133048	0.525127	0.283725	70.5154
1	1048	15.635	4.45036	0.1023	0.456362	0.27456	73.5941
1	962	21.9987	4.49711	0.0939051	0.419857	0.299538	65.2217
1	1296	48.7548	3.85983	0.126508	0.481024	0.298787	69.1693
1	1077.5	22.6225	4.42929	0.10518	0.466539	0.312115	72.5429
1	1056.5	67.4402	5.20598	0.10313	0.53588	0.257732	65.6865
1	933.5	17.0322	5.02129	0.091123	0.4556	0.246062	80.1618
1	1002	18.3062	4.33501	0.0978096	0.413289	0.28348	58.7507
1	996.5	52.6266	4.463	0.0972727	0.431796	0.280836	74.0182
1	1138.5	12.7873	4.54288	0.111134	0.505244	0.286378	70.7876
1	1045	14.2878	4.60245	0.102007	0.472433	0.290212	68.1094
1	765.5	17.4187	5.53248	0.0747238	0.412325	0.269206	51.6257
1	1556.5	23.6902	3.76057	0.151937	0.568784	0.313408	81.2039
1	1347.5	39.3479	4.16243	0.131535	0.546752	0.314676	84.2517
1	1529	49.0776	5.05279	0.149252	0.755706	0.289076	82.6822
1	993.5	50.494	4.47009	0.0969799	0.433407	0.314429	57.8072
1	980.5	46.7212	5.2794	0.0957109	0.504826	0.236309	86.7934
1	1048	26.381	4.25841	0.1023	0.435421	0.290732	84.3627
1	817.5	21.2292	5.35677	0.0797998	0.424416	0.253187	55.2913
1	1173	58.1252	5.51713	0.114502	0.631888	0.328916	55.2433
1	1190	65.4228	4.00568	0.116161	0.464504	0.312826	77.787
1	703.5	12.0817	5.7532	0.0686717	0.395233	0.238965	61.8236
1	1021	35.2665	4.74756	0.0996643	0.473916	0.281214	68.5794
1	720.5	36.9118	5.03	0.0703312	0.354064	0.249589	79.1556
1	1076	33.0109	4.14269	0.105033	0.434973	0.326877	78.3485
1	1067	27.1641	4.55705	0.104155	0.475833	0.311016	62.3726
1	808.5	28.5696	5.75645	0.0789212	0.458195	0.228098	69.6628
1	964.5	29.3612	4.38428	0.0941491	0.413228	0.280216	72.3659
1	651	14.4204	5.72158	0.063547	0.360644	0.234966	61.8898
1	887	12.6431	4.7511	0.086584	0.415272	0.277327	72.2624
1	1144	42.6716	5.38132	0.111671	0.601336	0.32954	67.4618
1	936	36.9881	4.62177	0.0913671	0.422053	0.28158	74.9597
1	945	22.6437	4.63105	0.0922456	0.421893	0.276548	69.5852
1	712	11.0975	6.66167	0.0695015	0.460108	0.216902	76.8298
1	1257	52.9028	4.53504	0.122701	0.553568	0.299767	71.3726
1	954.5	41.981	4.73836	0.0931729	0.445924	0.275436	69.1158
1	958.5	31.9745	4.50982	0.0935634	0.419596	0.258183	72.9081
1	1146.5	48.6551	4.76795	0.111915	0.532829	0.278278	74.613
1	954.5	20.838	5.10217	0.0931729	0.467051	0.275629	41.9521
1	1331.5	50.508	4.07405	0.129974	0.528994	0.298925	72.1707
1	648.5	42.2906	7.15897	0.0633029	0.455361	0.177188	76.346
1	1539	60.9784	4.77964	0.150229	0.714376	0.339812	73.2279
1	803.5	12.6067	5.4529	0.0784332	0.431673	0.237438	83.5339
1	1108	33.6588	4.2405	0.108157	0.461912	0.303222	78.9334
1	830.5	39.3877	5.73594	0.0810688	0.471474	0.243275	47.3725
1	1214.5	16.8911	4.1219	0.118553	0.486604	0.322995	66.5934
1	1108.5	16.0585	4.05188	0.108206	0.438473	0.276123	69.266
1	1472	53.2151	3.98065	0.143688	0.567034	0.31462	63.9129
1	990	24.0511	5.05113	0.0966383	0.488261	0.269016	59.5303
1	1243	33.7966	3.89497	0.121335	0.463453	0.324408	75.3657
1	986	38.1924	5.10638	0.0962478	0.491126	0.250436	74.5012
1	750	47.518	5.51295	0.0732108	0.400728	0.222769	72.3448
1	973	31.2857	4.74759	0.0949788	0.448802	0.278923	72.1332
1	887	20.4375	4.81385	0.086584	0.405959	0.267884	63.1893
1	1014.5	47.476	4.74074	0.0990298	0.473961	0.270736	74.5813
1	1355	45.4451	4.04545	0.132268	0.519248	0.317693	69.2182
1	1404.5	23.7538	3.67409	0.137099	0.502899	0.317599	82.1101
1	920	46.245	4.56416	0.0898052	0.409183	0.286908	70.5999
1	671	44.7878	6.51865	0.0654993	0.427798	0.207672	62.7118
1	792	48.7784	5.78453	0.0773106	0.445384	0.209117	77.1514
1	1052.5	66.4288	4.61814	0.102739	0.470704	0.264579	71.8309
1	1178.5	48.6373	4.13904	0.115039	0.476756	0.318035	85.264
1	680.5	10.8752	5.55778	0.0664266	0.368475	0.23711	69.2851
1	1280.5	19.0601	4.02544	0.124995	0.503265	0.339733	63.6626
1	1124.5	15.0061	4.24435	0.109767	0.4659	0.314293	86.2889
1	963.5	47.1779	4.71574	0.0940515	0.44711	0.268032	74.1025
1	1138.5	44.3605	4.68415	0.111134	0.520345	0.290711	83.7822
1	921.5	39.9606	4.89796	0.0899517	0.433599	0.274321	55.7637
1	1235	46.8765	4.30528	0.120554	0.520661	0.318102	60.539
1	707.5	7.62419	5.5445	0.0690622	0.382694	0.243783	73.3926
1	1089.5	19.6586	4.33492	0.106351	0.461003	0.313886	79.4045
1	925	15.9184	5.05481	0.0902933	0.440273	0.25925	67.5311
1	1103.5	36.6237	4.55076	0.107717	0.493299	0.292539	61.7267
1	1065	51.9073	4.34351	0.103959	0.445155	0.305755	54.7453
1	814.5	46.7833	5.08434	0.0795069	0.401655	0.268282	73.066
1	812	18.959	5.02946	0.0792629	0.391865	0.265659	63.547
1	1182.5	36.9676	4.17857	0.115429	0.482089	0.320429	65.4188
1	1538.5	22.2729	3.79958	0.15018	0.567867	0.3221	83.3038
1	891.5	21.3161	5.10768	0.0870232	0.441053	0.260258	83.3618
1	1284	56.8903	4.04885	0.125337	0.506982	0.298434	79.1487
1	1116.5	31.8249	4.86308	0.108986	0.529651	0.316609	77.9266
1	1539.5	61.3644	4.0054	0.150277	0.601359	0.367259	64.4301
1	980	21.2094	4.7562	0.0956621	0.455046	0.270409	71.0283
1	830	31.633	5.38383	0.08102	0.436654	0.260066	80.4814
1	990.5	33.1193	4.69885	0.0966871	0.45367	0.259542	85.3255
1	948	56.5731	5.45656	0.0925384	0.502094	0.24179	70.5552
1	1371	36.581	3.75957	0.133829	0.503528	0.358481	65.6298
1	898	54.5484	4.93972	0.0876577	0.429752	0.289599	70.2434
1	1067	59.8836	4.78657	0.104155	0.498346	0.256187	85.0119
1	1120.5	26.4365	4.52633	0.109377	0.494576	0.292816	72.5803
1	1173	39.5197	4.38834	0.114502	0.500568	0.308131	81.2403
1	1138	23.0851	4.32419	0.111085	0.480313	0.285933	78.2427
1	1048	53.2198	4.44566	0.1023	0.453073	0.281963	67.0793
1	1135.5	27.9501	4.17148	0.110841	0.461614	0.312953	76.6735
1	949.5	22.7752	4.56522	0.0926849	0.422649	0.27326	74.4041
1	1264	32.4579	4.20991	0.123385	0.520143	0.319921	77.9176
1	920.5	25.5414	4.7238	0.0898541	0.427354	0.283972	53.8425
1	1081	42.6051	4.53771	0.105521	0.477728	0.287681	79.8134
1	898	21.1251	4.60823	0.0876577	0.403559	0.289742	76.8722
1	1205.5	26.8329	3.92115	0.117674	0.461076	0.309687	76.1837
1	1152	8.83337	4.53785	0.112452	0.506946	0.275896	78.4814
1	662	25.9472	6.19796	0.0646207	0.395764	0.236593	74.3357
1	841	10.6308	4.66461	0.0820937	0.383133	0.274014	52.5589
1	1044	16.433	4.63248	0.101909	0.472101	0.286459	81.3494
1	849	23.3108	4.84645	0.0828746	0.403091	0.249708	82.1324
1	689.5	27.0584	5.04859	0.0673051	0.335878	0.254863	50.3637
1	911	55.3153	4.93603	0.0889267	0.439683	0.248737	46.2232
1	630.5	37.9666	6.75798	0.0615459	0.415832	0.220572	59.4206
1	717.5	21.6288	6.26452	0.0700383	0.437233	0.222792	72.8868
1	899.5	66.6142	4.96511	0.0878042	0.433644	0.253805	54.0847
1	780	39.81	5.14817	0.0761392	0.390462	0.231729	84.439
1	882	27.9097	4.88656	0.0860959	0.424697	0.27996	67.5653
1	1170.5	49.1338	4.4334	0.114258	0.505056	0.295191	68.6952
1	1257.5	63.6303	3.77453	0.12275	0.463229	0.293789	65.306
1	883.5	35.3015	5.23274	0.0862423	0.451356	0.269647	45.9166
1	845.5	26.9111	5.0579	0.082533	0.415832	0.252522	85.1874
1	786.5	22.0141	6.96122	0.0767737	0.524655	0.254619	79.2206
1	839	42.4356	4.37744	0.0818985	0.356902	0.299583	61.5503
1	1043	65.0277	5.80695	0.101812	0.583587	0.252245	72.0601
1	884.5	42.6165	5.32886	0.0863399	0.46028	0.245096	79.5062
1	1048	31.5884	4.80001	0.1023	0.492288	0.264884	76.4101
1	1448.5	43.0657	3.6983	0.141394	0.523535	0.323785	85.321
1	927.5	35.7934	4.52666	0.0905374	0.409508	0.284401	74.2596
1	1151.5	35.0284	4.2265	0.112403	0.474867	0.314127	60.3969
1	903.5	27.6172	4.4948	0.0881946	0.3948	0.294815	60.4527
1	1139	26.5773	4.31581	0.111183	0.480311	0.333975	63.2754
1	794.5	22.468	5.12185	0.0775546	0.39456	0.272738	79.8371
1	865.5	10.3544	5.13156	0.0844853	0.427429	0.285085	69.9642
1	819	33.6292	5.30512	0.0799462	0.424133	0.277108	56.9255
1	1303	57.6529	4.99275	0.127192	0.633958	0.347032	74.1245
1	613.5	17.8831	6.28498	0.0598864	0.376381	0.22976	64.6631
1	952	26.2575	4.80368	0.0929289	0.442003	0.273624	59.7643
1	1123	43.5702	4.37302	0.109621	0.474414	0.286141	67.9967
1	1201.5	62.1456	5.02555	0.117284	0.581209	0.253468	72.3005
1	1491.5	27.9435	4.57982	0.145592	0.669455	0.281015	84.6716
1	1047.5	41.7946	4.2733	0.102251	0.437088	0.286965	60.1456
1	1027	32.038	4.77668	0.10025	0.476756	0.288223	64.7576
1	839	31.8282	5.51571	0.0818985	0.44467	0.247296	82.1457
1	1041	31.5166	4.05975	0.101617	0.412031	0.305525	62.1011
1	975	36.5932	4.41532	0.095174	0.41858	0.301458	62.7222
1	901.5	37.3315	4.37716	0.0879994	0.388556	0.281401	44.7259
1	1275.5	58.3378	4.9681	0.124507	0.618439	0.261701	73.4383
1	1243	76.2173	5.59379	0.121335	0.67424	0.299074	74.082
1	719	32.6202	7.0011	0.0701848	0.49208	0.22621	64.2828
1	961.5	32.023	4.30542	0.0938562	0.40335	0.297901	54.3552
1	1107	21.7683	4.7988	0.108059	0.518141	0.269544	79.0947
1	1078	18.6271	4.18681	0.105228	0.440353	0.304355	75.6784
1	1067	27.7313	4.02572	0.104155	0.419618	0.333489	25.4764
1	1303.5	54.8253	4.76865	0.12724	0.606686	0.268856	86.3948
1	901.5	17.1088	4.73004	0.0879994	0.413986	0.28158	58.352
1	1031	23.6867	4.60058	0.10064	0.459265	0.298422	75.5828
1	898	25.2461	5.30858	0.0876577	0.463428	0.245904	82.0727
1	1078	21.6163	4.44091	0.105228	0.467774	0.314225	50.5733
1	931	14.983	4.584	0.090879	0.417047	0.271319	74.945
1	1100	26.3184	4.35232	0.107376	0.465118	0.310995	76.4929
1	1199.5	17.4856	4.1546	0.117088	0.486162	0.311261	82.6891
1	1008.5	32.502	4.54241	0.0984441	0.447665	0.289599	70.1684
1	1042.5	38.0421	5.27594	0.101763	0.531894	0.248155	81.0976
1	1247.5	21.2073	4.20271	0.121774	0.50757	0.295446	74.2622
1	775.5	67.1821	6.05299	0.0757	0.457714	0.219957	74.327
1	943	14.5716	4.69802	0.0920504	0.426923	0.278127	80.1049
1	1013	29.7828	4.27878	0.0988834	0.422507	0.278447	40.8905
1	1096	27.8703	4.03787	0.106985	0.429369	0.303278	53.4445
1	1204.5	29.7711	4.15337	0.117577	0.486016	0.327875	77.5632
1	985	28.487	4.78005	0.0961502	0.459806	0.275963	78.1231
1	649.5	19.2993	7.01892	0.0634006	0.443824	0.222792	57.4906
1	903.5	33.6523	4.86925	0.0881946	0.430742	0.264788	63.3615
1	1235.5	36.5022	4.26078	0.120603	0.512857	0.301987	72.6402
1	1068.5	48.6171	4.57639	0.104301	0.475306	0.275681	70.0786
1	671	36.2031	7.12274	0.0654993	0.465523	0.197162	76.7354
1	1198.5	48.2453	5.50489	0.116991	0.641133	0.252276	85.3105
1	1542.5	57.7915	4.03569	0.15057	0.605291	0.312294	75.2892
1	1298.5	30.3574	4.15275	0.126752	0.525245	0.295947	81.1561
1	824.5	24.9519	5.13811	0.0804831	0.415945	0.257045	62.7469
1	593.5	10.7041	5.23343	0.0579341	0.303548	0.22872	77.0235
1	997	14.1798	4.63516	0.0973216	0.448205	0.269381	71.1777
1	1184	21.3839	4.15559	0.115575	0.478672	0.32152	59.7056
1	795	24.6893	5.30924	0.0776034	0.412758	0.251216	79.908
1	731.5	20.6536	5.63336	0.0714049	0.399324	0.235876	72.823
1	951	38.3737	4.64123	0.0928313	0.429032	0.268856	82.1569
1	1203.5	14.3815	3.99495	0.117479	0.46878	0.338129	84.1071
1	1062	49.9026	4.09442	0.103666	0.423874	0.334811	54.2447
1	1171.5	22.9319	3.72325	0.114355	0.424456	0.344478	57.7168
1	1096	35.8005	4.592	0.106985	0.490616	0.273508	73.1218
1	1339	56.6443	4.36917	0.130706	0.569528	0.341646	86.9829
1	983	22.073	4.71621	0.095955	0.451041	0.271664	82.0805
1	1093	17.818	4.24499	0.106693	0.452567	0.306911	74.5141
1	1118	28.5728	4.42501	0.109133	0.48204	0.283624	67.552
1	1102.5	14.2353	4.92053	0.10762	0.528618	0.258489	77.9784
1	1171.5	54.0067	4.08083	0.114355	0.466917	0.305285	69.4459
1	1191	48.3162	4.28847	0.116259	0.488124	0.286523	73.3847
1	951	37.028	4.70035	0.0928313	0.440434	0.29021	69.0951
1	829	39.0054	4.98047	0.0809223	0.402936	0.282986	67.3156
1	936	16.5729	4.6049	0.0913671	0.416565	0.274382	73.0872
1	1792.5	57.6476	3.61794	0.174974	0.634375	0.373057	65.7617
1	691.5	26.3191	5.79401	0.0675004	0.389952	0.236085	76.8108
1	782	18.3839	5.48709	0.0763345	0.405282	0.24475	72.6289
1	1058	22.7337	4.30085	0.103276	0.446988	0.303488	46.8143
1	1505	47.2091	3.89941	0.14691	0.572778	0.326557	80.589
1	864.5	35.0963	6.07942	0.0843876	0.51286	0.31243	37.7837
1	1209	54.2583	4.3398	0.118016	0.509065	0.3159	82.0742
1	1357.5	43.0631	3.9154	0.132512	0.518135	0.312496	76.8006
1	1077	13.5647	4.64124	0.105131	0.488591	0.290293	80.4148
1	1142.5	19.4108	4.58013	0.111524	0.509428	0.273502	84.1885
1	994.5	35.8721	4.44926	0.0970775	0.431894	0.277553	78.5754
1	1014.5	73.5516	4.52852	0.0990298	0.445362	0.286018	70.2584
1	1711.5	54.2182	4.05764	0.167067	0.6781	0.319068	80.1731
1	845.5	8.83756	5.08581	0.082533	0.413135	0.249526	75.5519
1	1093	16.1388	4.50003	0.106693	0.481465	0.285827	72.7039
1	745.5	24.2902	5.49566	0.0727715	0.400506	0.22885	78.7121
1	1228.5	29.858	4.34442	0.119919	0.51589	0.304996	75.9187
1	1536.5	50.2323	4.22271	0.149985	0.633112	0.317592	87.909
1	852.5	46.3334	5.62587	0.0832163	0.471254	0.226166	77.4414
1	1137	57.8622	4.21177	0.110988	0.46024	0.335985	70.875
1	969	40.7901	4.8509	0.0945884	0.440129	0.28799	71.4501
1	1258.5	52.6758	4.60397	0.122848	0.551353	0.296767	82.1327
1	1013.5	32.2119	4.76646	0.0989322	0.464881	0.282984	68.0666
1	845	46.2144	5.35333	0.0824842	0.441167	0.233815	63.6317
1	943	38.4647	4.82946	0.0920504	0.442046	0.272125	71.4569
1	840	11.4185	4.73085	0.0819961	0.388893	0.267207	66.8671
1	787.5	35.7063	5.08132	0.0768713	0.386029	0.243683	40.6558
1	1042.5	46.8043	4.6627	0.101763	0.478328	0.271666	76.0054
1	887	38.0442	4.9512	0.086584	0.420768	0.25371	61.0367
1	1291.5	59.7951	4.88631	0.126069	0.611749	0.279274	60.4023
1	906.5	16.6922	4.8806	0.0884875	0.430034	0.266686	70.8296
1	1038	28.8775	4.43251	0.101324	0.450414	0.307166	73.9255
1	560.5	22.0242	7.80298	0.0547129	0.418814	0.188114	44.3995
1	1283.5	62.0579	4.06247	0.125288	0.506688	0.315025	75.0271
1	961	32.139	4.3632	0.0938074	0.408552	0.305041	76.4061
1	1141	14.7984	4.24653	0.111378	0.46906	0.297317	73.7375
1	1084.5	50.7952	4.49257	0.105863	0.472116	0.308503	76.7776
1	855	8.63641	4.99592	0.0834603	0.411792	0.266386	66.7346
1	782.5	48.3954	5.40052	0.0763833	0.411941	0.235632	62.3476
1	1206	54.3842	4.65674	0.117723	0.536853	0.282418	86.7688
1	730.5	41.2356	5.52129	0.0713073	0.39345	0.253451	70.9683
1	1002.5	62.1497	4.7904	0.0978584	0.458699	0.259927	65.0215
1	1059.5	24.1861	4.33866	0.103422	0.447227	0.301751	84.8476
1	760	28.8902	5.36865	0.0741869	0.393382	0.243341	83.5872
1	1223	26.6825	4.20444	0.119382	0.501955	0.299243	78.419
1	757	36.5008	5.40414	0.0738941	0.397485	0.227709	81.8621

## Sheet: Col_hAT_C
Predicate	Pixel count	SSE	LS Ratio	Surface	Length	Width	Axes angle
1	1056.5	54.2582	5.05276	0.10313	0.517553	0.287879	78.9966
1	912.5	20.8232	4.67579	0.0890731	0.414409	0.26002	68.8584
1	1138	36.047	4.22246	0.111085	0.457769	0.288275	78.1704
1	1180.5	57.4771	4.5609	0.115234	0.522495	0.283919	72.4196
1	1068.5	18.3736	4.41477	0.104301	0.459219	0.271142	86.0881
1	1316	50.2021	4.16438	0.128461	0.534638	0.290777	80.623
1	1144.5	42.2486	4.61428	0.11172	0.498227	0.260229	66.7885
1	1023	27.377	4.79888	0.0998595	0.482186	0.278494	73.7036
1	1144.5	24.4636	4.56096	0.11172	0.504653	0.264049	79.4301
1	1283	37.288	3.96215	0.125239	0.489305	0.302093	68.485
1	1254	40.6356	4.62235	0.122408	0.561738	0.257438	72.7941
1	1246.5	26.9118	4.25429	0.121676	0.51455	0.298752	73.1613
1	1073	57.0026	5.20118	0.10474	0.544406	0.247955	79.0771
1	1518	67.0734	3.67941	0.148179	0.545182	0.318759	79.842
1	1204.5	72.4724	4.19599	0.117577	0.489282	0.306223	77.4333
1	950	50.212	4.99928	0.0927337	0.458535	0.246225	77.7963
1	1070.5	55.5786	5.01604	0.104496	0.511222	0.282983	71.6947
1	970	66.9155	4.68611	0.094686	0.442686	0.260305	78.8002
1	1183	48.1511	4.38859	0.115478	0.50123	0.276861	80.822
1	871.5	31.2861	5.0744	0.0850709	0.425676	0.257582	79.7403
1	1212	50.2105	4.19225	0.118309	0.495027	0.285429	83.8589
1	1353.5	36.6348	3.93722	0.132121	0.517906	0.326776	70.0081
1	1007.5	19.565	4.5407	0.0983465	0.448734	0.277852	76.2257
1	1108.5	35.0249	4.26473	0.108206	0.453297	0.276177	63.3265
1	1208	31.729	4.38138	0.117918	0.520269	0.288217	68.7097
1	1181.5	39.9989	4.30493	0.115331	0.493483	0.288917	75.8089
1	1019	12.4166	4.33077	0.0994691	0.431085	0.281713	73.977
1	1312	32.8791	3.97522	0.12807	0.507437	0.300226	82.9487
1	1197.5	39.6967	3.9684	0.116893	0.462253	0.304095	64.6447
1	888.5	62.1092	5.39914	0.0867304	0.467313	0.252643	68.6781
1	745.5	40.8357	5.92734	0.0727715	0.420379	0.212317	70.0143
1	1173	22.8252	4.61556	0.114502	0.527574	0.27172	78.1363
1	786.5	23.9448	5.16523	0.0767737	0.396596	0.261257	61.1925
1	823.5	38.9431	5.22392	0.0803855	0.41941	0.262612	82.5776
1	1157.5	20.7297	4.20853	0.112989	0.47393	0.294625	65.6385
1	1137.5	40.1526	3.9099	0.111036	0.434102	0.304631	64.2588
1	1317.5	23.8488	4.4688	0.128607	0.569343	0.301505	82.6499
1	1288.5	21.7672	4.18375	0.125776	0.52748	0.286931	72.9687
1	1237	59.7355	4.52961	0.120749	0.545726	0.280016	74.8753
1	1034.5	19.6207	4.88335	0.100982	0.495322	0.268398	75.5946
1	1092.5	42.7507	4.63517	0.106644	0.49389	0.270377	62.6658
1	1101.5	21.1892	4.44154	0.107522	0.47197	0.300085	87.926
1	1061.5	25.6973	4.66763	0.103618	0.483918	0.284805	71.175
1	1008.5	39.9904	5.15584	0.0984441	0.505861	0.261477	78.4322
1	1385.5	18.6941	3.7572	0.135245	0.507719	0.330516	69.1324
1	1139.5	35.7392	4.33688	0.111232	0.480526	0.284918	84.2859
1	821.5	21.8642	5.62417	0.0801902	0.450932	0.240077	71.6296
1	1246.5	16.4181	4.20319	0.121676	0.511217	0.302276	81.0238
1	1416.5	46.2252	4.18271	0.138271	0.576322	0.296708	64.0715
1	1079.5	52.8883	4.57265	0.105375	0.480438	0.261908	81.3845
1	1060.5	21.2963	4.44868	0.10352	0.459869	0.276725	48.3549
1	820	19.8974	5.43039	0.0800438	0.434871	0.236808	80.6939
1	1143.5	34.57	4.50794	0.111622	0.503062	0.291704	64.715
1	1197	31.0345	4.27993	0.116844	0.497203	0.281524	83.5932
1	1291.5	18.9223	4.12672	0.126069	0.523998	0.305003	84.2499
1	893.5	17.1655	5.06336	0.0872185	0.441847	0.27168	86.3373
1	1306.5	37.3007	4.02554	0.127533	0.513262	0.299664	76.9058
1	1146	30.2247	4.60756	0.111866	0.510393	0.270366	78.8687
1	862.5	23.2769	5.03277	0.0841924	0.429691	0.278303	59.9041
1	1388.5	24.9966	4.12228	0.135538	0.558378	0.31122	81.6677
1	899	28.8106	4.61633	0.0877553	0.403347	0.288537	74.1088
1	1149	25.7757	4.3224	0.112159	0.482329	0.310618	80.7206
1	1060.5	14.4204	4.6541	0.10352	0.482889	0.27989	84.3629
1	1169.5	60.7385	4.10244	0.11416	0.466336	0.295764	65.7433
1	1103.5	28.6674	4.8217	0.107717	0.513146	0.257189	85.7725
1	1109	26.6355	4.54774	0.108254	0.488371	0.268511	87.4888
1	943	24.939	4.70811	0.0920504	0.436265	0.302872	65.8196
1	1330.5	38.1963	4.08649	0.129876	0.528638	0.299946	87.1036
1	1119.5	46.8482	4.39183	0.109279	0.477241	0.282794	71.7544
1	1006.5	42.0593	4.7945	0.0982489	0.455666	0.256453	55.9686
1	1220	39.0506	4.54978	0.11909	0.520457	0.26617	81.736
1	1230	24.9872	4.30017	0.120066	0.521231	0.307778	72.8131
1	905.5	34.1191	5.37909	0.0883898	0.475504	0.275347	56.2069
1	1254	40.8472	4.21011	0.122408	0.511253	0.28973	74.7262
1	1037.5	30.7237	4.60936	0.101275	0.467252	0.285339	86.9481
1	804.5	32.4597	5.2656	0.0785308	0.414536	0.252429	76.5163
1	1210.5	16.7633	4.10415	0.118162	0.48484	0.294798	76.1049
1	1294.5	28.6164	4.58269	0.126362	0.578876	0.274648	65.0442
1	1357.5	43.6834	4.23251	0.132512	0.560986	0.293829	80.0257
1	1039	18.3396	4.50288	0.101421	0.454634	0.301001	82.0996
1	915.5	26.1888	5.27928	0.089366	0.457937	0.243128	74.1766
1	1230.5	23.6431	4.27679	0.120115	0.511915	0.302819	75.8382
1	1023.5	31.8584	4.58612	0.0999083	0.46297	0.299827	51.0365
1	907	23.2112	6.12377	0.0885363	0.528578	0.251128	61.6832
1	1217.5	27.3103	4.32642	0.118846	0.513963	0.275745	85.1715
1	1289	38.0168	4.20121	0.125825	0.52914	0.301767	83.7989
1	942.5	24.9582	4.87096	0.0920016	0.446822	0.236085	73.0137
1	800	32.7285	5.64529	0.0780915	0.434154	0.24174	58.9459
1	1161.5	44.6731	4.15267	0.113379	0.471569	0.328553	57.1605
1	1271.5	22.3177	4.37804	0.124117	0.542571	0.272703	72.4425
1	1046	40.0318	4.7484	0.102105	0.481624	0.266394	74.1311
1	1133	30.1121	4.86763	0.110597	0.529368	0.277951	71.1438
1	1158.5	32.2786	4.52047	0.113086	0.509567	0.261717	72.9954
1	1006	35.7504	4.40083	0.0982001	0.43198	0.302413	36.3679
1	1558	38.0349	3.74811	0.152083	0.569079	0.318877	62.2667
1	1336	16.97	3.88559	0.130413	0.506437	0.298012	77.9477
1	1267.5	35.4572	4.05593	0.123726	0.500937	0.312012	80.4514
1	1377	26.7784	3.91132	0.134415	0.525969	0.299026	74.3093
1	1083	66.3451	4.35372	0.105716	0.459021	0.267214	68.8974
1	1247.5	45.5555	4.37024	0.121774	0.528094	0.270209	82.2496
1	1288.5	41.4878	4.29986	0.125776	0.528558	0.28801	80.1958
1	945	29.0146	4.90116	0.0922456	0.451303	0.271966	78.5441
1	1543.5	64.4049	4.09951	0.150668	0.608828	0.313212	77.7524
1	1192	12.4675	4.51939	0.116356	0.521419	0.288857	83.3302
1	1168	44.658	4.76065	0.114014	0.54374	0.305267	57.9058
1	1098	33.0452	4.75659	0.107181	0.504721	0.298501	84.291
1	1288	25.6247	3.72642	0.125727	0.468369	0.339717	81.099
1	933.5	12.6408	4.84638	0.091123	0.435571	0.25688	74.8382
1	1042.5	41.0151	5.86499	0.101763	0.596819	0.262106	64.215
1	1052	28.955	4.1581	0.10269	0.427758	0.330179	59.2666
1	1084	16.7741	4.45561	0.105814	0.471264	0.283086	77.5129
1	1330	15.086	4.06849	0.129827	0.528087	0.309493	62.972
1	870	9.22981	5.53129	0.0849245	0.474547	0.24013	80.7763
1	1260.5	24.4105	4.43804	0.123043	0.546037	0.279452	72.9398
1	1173.5	8.81823	4.22244	0.114551	0.483903	0.311079	72.4257
1	1233.5	13.2192	4.65428	0.120407	0.550576	0.268908	73.8757
1	1498.5	15.54	3.91191	0.146275	0.572026	0.301579	78.6197
1	1121	28.222	4.64589	0.109426	0.508169	0.274859	84.1095
1	879.5	17.3261	4.95003	0.0858519	0.41485	0.258902	64.7896
1	1245	48.2267	4.20013	0.12153	0.510302	0.308819	62.2887
1	1021.5	35.3888	4.70479	0.0997131	0.470691	0.259497	65.5043
1	901	22.9897	5.56145	0.0879506	0.487283	0.209885	83.8195
1	759	10.5559	5.85378	0.0740893	0.427246	0.236491	81.8699
1	1312.5	25.621	4.28432	0.128119	0.548156	0.275814	73.9991
1	728.5	16.616	6.42408	0.0711121	0.451964	0.214163	78.9972
1	970	52.839	5.07375	0.094686	0.465262	0.228677	78.0353
1	1297.5	43.3663	4.00332	0.126655	0.49832	0.317576	62.0115
1	1226	55.1064	4.06472	0.119675	0.486026	0.304182	56.976
1	847	12.6025	5.55602	0.0826794	0.464958	0.249176	69.4185
1	874.5	17.2472	5.31459	0.0853638	0.454827	0.26264	58.892
1	1114.5	29.6446	4.1304	0.108791	0.446122	0.307853	66.2244
1	880.5	39.7295	4.98067	0.0859495	0.429682	0.272552	67.0358
1	1029	35.197	4.73763	0.100445	0.475631	0.276169	77.2651
1	1122.5	55.1715	4.45107	0.109572	0.484159	0.294231	69.9951
1	990.5	27.5149	4.82796	0.0966871	0.464623	0.23712	84.6306
1	1062	40.2298	4.49349	0.103666	0.46225	0.296357	61.0268
1	863.5	14.1952	5.19839	0.08429	0.444273	0.248332	83.4307
1	773.5	20.521	5.5593	0.0755047	0.419688	0.248476	67.0217
1	1184.5	20.055	4.63351	0.115624	0.530201	0.298546	81.0544
1	1253	61.0017	3.98087	0.122311	0.487335	0.2964	60.9818
1	1179	22.6051	4.3734	0.115087	0.502514	0.291551	75.6948
1	841	51.0772	5.92991	0.0820937	0.483477	0.233472	78.3355
1	880	30.5702	4.64215	0.0859007	0.39847	0.240249	46.0805
1	1299	44.5212	5.05931	0.126801	0.647179	0.313104	66.2775
1	1048.5	26.8212	4.44535	0.102349	0.454938	0.253575	68.3787
1	979.5	36.1754	4.83756	0.0956133	0.458947	0.25392	79.8112
1	1088.5	30.4521	4.81014	0.106253	0.510499	0.254759	78.5876
1	1182.5	42.0742	4.44386	0.115429	0.513514	0.305363	80.3929
1	1177	23.1892	3.95397	0.114892	0.453156	0.27989	86.2611
1	1146.5	30.2027	4.68345	0.111915	0.519276	0.255605	87.2506
1	1182.5	57.674	4.67663	0.115429	0.542626	0.299096	72.5167
1	1401.5	64.3324	3.80039	0.136807	0.521451	0.319398	67.2203
1	1000.5	27.7845	4.29352	0.0976632	0.420478	0.304917	39.1927
1	1114	15.6619	4.49387	0.108742	0.484888	0.280195	67.9701
1	1344	18.922	4.14518	0.131194	0.540981	0.316893	77.4468
1	963	14.8455	4.53589	0.0940027	0.426837	0.286878	59.3833
1	1107	55.8544	4.84144	0.108059	0.520093	0.272609	71.7658
1	1012.5	33.2646	4.58565	0.0988346	0.452696	0.280659	82.9601
1	1298	25.5983	3.94631	0.126703	0.499189	0.296501	77.3076
1	770	63.6964	5.7496	0.0751631	0.427555	0.222628	62.4042
1	1428	21.6581	4.06542	0.139393	0.565659	0.334017	72.6513
1	1163.5	33.8301	4.15779	0.113574	0.467413	0.312199	79.3791
1	1408	33.3605	4.14147	0.137441	0.54498	0.298489	75.1189
1	1222	32.4482	4.30409	0.119285	0.512836	0.305532	86.4799
1	1154.5	33.9224	4.60081	0.112696	0.510603	0.278024	88.6551
1	1181.5	43.05	4.75012	0.115331	0.542787	0.27672	80.5007
1	962.5	15.1865	4.57087	0.0939539	0.42778	0.258823	64.4528
1	1245	23.4971	4.00787	0.12153	0.484483	0.298668	67.776
1	1169.5	28.2284	4.57651	0.11416	0.512779	0.286726	73.3946
1	931	27.9211	4.72051	0.090879	0.42648	0.280067	69.7959
1	1271	63.5971	4.05649	0.124068	0.503211	0.288974	75.7505
1	1015.5	27.1318	4.7043	0.0991274	0.466788	0.281637	83.8593
1	947.5	27.4838	4.71437	0.0924896	0.427538	0.288232	41.9755
1	706	54.7187	5.7117	0.0689158	0.394028	0.207446	41.3794
1	822	12.0951	5.64792	0.080239	0.453322	0.227572	78.4478
1	1249.5	12.2419	4.24641	0.121969	0.516098	0.294537	82.5756
1	1029.5	47.4604	4.75315	0.100494	0.470495	0.265437	83.8148
1	1382	39.9067	4.19597	0.134903	0.563853	0.310303	81.2106
1	1316	31.5823	3.92027	0.128461	0.50152	0.309522	67.7202
1	1270	44.7393	4.62132	0.12397	0.560251	0.25194	65.7789
1	1213	59.2149	4.34455	0.118406	0.510799	0.282525	76.3912
1	1138	40.9868	4.19027	0.111085	0.466309	0.303105	72.6404
1	876	14.7948	5.04151	0.0855102	0.431446	0.26997	67.8594
1	1230.5	38.0848	4.68731	0.120115	0.560334	0.310494	78.0619
1	975.5	22.0744	4.57709	0.0952228	0.434661	0.293237	64.9069
1	1238	59.1021	4.16518	0.120847	0.501176	0.269168	80.4879
1	1546.5	33.968	3.90947	0.150961	0.589321	0.32237	86.704
1	1316.5	55.7583	4.64343	0.128509	0.597254	0.275748	78.4839
1	1074.5	46.8988	4.50938	0.104887	0.471484	0.292254	67.127
1	994	39.6802	4.67911	0.0970287	0.450974	0.257394	55.1721
1	1148.5	54.0103	4.41035	0.11211	0.492645	0.258084	82.4845
1	1087.5	21.2988	4.60599	0.106156	0.47908	0.288743	64.1113
1	1416	24.8072	3.87976	0.138222	0.531031	0.29146	81.9846
1	955	38.6464	4.96911	0.0932218	0.45412	0.272253	72.5354
1	1170.5	51.0585	4.39261	0.114258	0.503672	0.279492	72.8535
1	1197.5	24.6155	4.54737	0.116893	0.5317	0.272465	76.2597
1	1077	21.1155	4.71673	0.105131	0.492158	0.257232	83.9208
1	1013.5	13.6297	4.50498	0.0989322	0.445007	0.273211	72.8406
1	1268	19.5026	4.06457	0.123775	0.501934	0.311616	71.4499
1	1332.5	29.1364	4.43688	0.130071	0.573284	0.300391	74.2266
1	1293	44.0486	4.16478	0.126215	0.525659	0.297165	71.7777
1	820	51.6847	6.75259	0.0800438	0.531074	0.255367	74.9236
1	932	40.695	5.13163	0.0909766	0.446215	0.245321	60.4115
1	972.5	27.5447	4.74694	0.09493	0.454175	0.270014	79.4005
1	1044	55.4079	4.42421	0.101909	0.452911	0.283325	69.0767
1	1311.5	34.0855	4.22518	0.128021	0.540869	0.290222	79.3212
1	1053.5	32.0425	4.36396	0.102837	0.450973	0.301502	53.5327
1	1184	49.4757	4.52341	0.115575	0.518836	0.284137	81.5096
1	959.5	47.0008	4.65633	0.093661	0.432427	0.293552	75.2151
1	1059.5	31.5844	4.64666	0.103422	0.477223	0.327784	24.8604
1	1283.5	32.0113	4.36476	0.125288	0.542635	0.28652	75.2819
1	1623	16.4091	4.0832	0.158428	0.645741	0.33191	66.9208
1	1078.5	18.5086	4.64294	0.105277	0.485851	0.261843	71.8983
1	970.5	26.3406	4.56756	0.0947348	0.432416	0.288054	59.3159
1	1222	29.8452	5.13363	0.119285	0.60054	0.253734	82.3419
1	959	32.9082	5.8162	0.0936122	0.523983	0.175467	84.9401
1	822	17.5879	4.79326	0.080239	0.384609	0.27716	82.4665
1	1243	29.2698	4.24914	0.121335	0.509554	0.292616	68.4389
1	981	29.8123	4.94949	0.0957597	0.478864	0.270144	72.7949
1	988	35.7069	4.46924	0.096443	0.430993	0.278924	73.2918
1	1226	36.9743	4.48411	0.119675	0.5281	0.288108	57.3458
1	1115	38.2271	4.20856	0.10884	0.456292	0.275076	82.4831
1	1009	48.3475	4.60017	0.0984929	0.452665	0.281214	69.0478
1	1176.5	39.6822	4.35877	0.114843	0.496045	0.289599	84.6651
1	1213	28.1841	4.78626	0.118406	0.563677	0.28103	73.4948
1	1023.5	37.8851	4.73172	0.0999083	0.471911	0.286251	74.9823
1	1231.5	45.8359	4.03111	0.120212	0.484603	0.327805	69.0016
1	1389.5	18.4224	3.95261	0.135635	0.535648	0.310127	87.6715
1	1003.5	36.0114	4.54603	0.0979561	0.445235	0.278407	63.8024
1	1476.5	31.0299	3.91856	0.144128	0.561118	0.323622	65.5875
1	773	28.311	5.60477	0.0754559	0.40791	0.234346	43.5548
1	869	50.359	4.91244	0.0848269	0.414842	0.248094	61.2888
1	1236.5	23.0561	4.43899	0.1207	0.527336	0.26676	60.0457
1	1154	11.5673	4.50211	0.112647	0.505162	0.273104	80.3618
1	1034.5	37.4686	4.46104	0.100982	0.448399	0.288577	58.4104
1	925	11.7853	5.16298	0.0902933	0.466473	0.268072	73.0315
1	952.5	27.1432	5.08276	0.0929777	0.477614	0.269882	86.4933
1	644	26.367	5.68436	0.0628637	0.352093	0.232744	61.3931
1	1400.5	22.9033	4.20212	0.136709	0.57028	0.295111	79.8275
1	1080.5	33.0149	4.70045	0.105472	0.490886	0.291693	61.8284
1	843	51.4059	5.69505	0.0822889	0.449696	0.22981	63.0691
1	1058	40.3498	4.62101	0.103276	0.475268	0.258718	84.8696
1	1098.5	28.3659	4.39405	0.107229	0.462968	0.289107	68.1808
1	781.5	32.239	5.46449	0.0762857	0.417785	0.223534	73.1039
1	870.5	21.2644	4.47264	0.0849733	0.380025	0.263331	74.5798
1	993.5	36.9963	4.87415	0.0969799	0.472691	0.281214	66.8997
1	1051.5	44.1084	4.86709	0.102642	0.493151	0.267969	79.6851
1	1016.5	55.299	4.1403	0.099225	0.409472	0.29704	64.2178
1	820	13.2422	5.45369	0.0800438	0.436416	0.236491	72.6256
1	676	24.0039	6.13791	0.0659873	0.404651	0.235502	79.0464
1	1165	45.4875	4.3588	0.113721	0.495747	0.284341	73.4736
1	1249	25.3264	4.29474	0.12192	0.515365	0.300683	81.7
1	1197	48.1834	4.18704	0.116844	0.489407	0.289543	80.1485
1	1178.5	58.1765	4.20906	0.115039	0.474868	0.289824	64.9531
1	1177	55.6809	4.08703	0.114892	0.467708	0.305371	68.3127
1	867	17.9452	4.92878	0.0846317	0.41196	0.271561	54.4715
1	1215.5	48.1452	4.51466	0.11865	0.534247	0.282742	67.5933
1	1203.5	41.5076	4.40346	0.117479	0.504237	0.302073	73.9502
1	964.5	26.837	4.6148	0.0941491	0.435262	0.299096	62.2278
1	1202	29.6781	4.2284	0.117333	0.49612	0.29858	65.7482
1	1086	23.0582	4.29172	0.106009	0.455466	0.288453	73.1483
1	1348.5	42.6756	3.99741	0.131633	0.524852	0.2924	72.6723
1	721	7.52914	5.89218	0.07038	0.417256	0.230801	53.0768
1	828	64.7626	4.90063	0.0808247	0.396557	0.261607	43.8081
1	1050.5	14.581	4.61744	0.102544	0.470443	0.270484	80.9576
1	1013.5	66.3817	4.34025	0.0989322	0.429388	0.273301	65.6744
1	982	29.7726	5.06613	0.0958573	0.483937	0.240186	79.9793
1	1009.5	71.987	4.03437	0.0985417	0.400463	0.312175	49.2135
1	1535.5	48.9761	4.44392	0.149887	0.662856	0.305639	69.281
1	1320.5	53.2577	4.14716	0.1289	0.534555	0.294925	67.4451
1	1241.5	50.5277	4.76442	0.121188	0.570896	0.268438	73.5459
1	1228.5	40.1934	4.30859	0.119919	0.517015	0.294911	75.4566
1	1194.5	28.8001	4.63045	0.1166	0.538963	0.28125	75.5201
1	853	51.7236	5.49867	0.0832651	0.444103	0.220584	58.8295
1	1167	43.0716	4.46176	0.113916	0.508652	0.294529	69.3891
1	850.5	51.8123	5.6288	0.083021	0.467111	0.242823	74.3284
1	1266	14.7263	3.73668	0.12358	0.461778	0.377266	60.4668
1	1157.5	29.6162	4.49973	0.112989	0.508564	0.288564	75.8517
1	788.5	46.4748	5.56833	0.076969	0.429148	0.266287	68.0293
1	1333.5	59.1585	4.16836	0.130169	0.539889	0.31645	74.7019
1	1433.5	14.5178	3.93363	0.13993	0.549726	0.327831	83.4772
1	1300	36.054	4.27549	0.126899	0.542571	0.294088	63.974
1	1134.5	44.1033	4.24779	0.110744	0.473155	0.285485	67.5359
1	765.5	20.5236	5.77446	0.0747238	0.440579	0.224037	53.817
1	1125.5	39.3274	4.22988	0.109865	0.468822	0.295488	73.9663
1	903.5	22.6061	4.90665	0.0881946	0.428512	0.236331	70.4625
1	1050.5	8.85879	4.47627	0.102544	0.458946	0.287625	75.6255
1	1226.5	20.4141	4.2506	0.119724	0.508754	0.275706	70.0902
1	1188.5	53.6361	4.42926	0.116015	0.501594	0.312861	72.4693
1	1403	36.9001	3.9392	0.136953	0.538111	0.302182	68.6648
1	892.5	16.3678	5.06972	0.0871208	0.446536	0.239161	56.8752
1	1407.5	38.3658	3.8763	0.137392	0.532511	0.30944	87.7978
1	1219	29.5233	4.58047	0.118992	0.541133	0.290127	74.0628
1	1206	19.3225	4.18767	0.117723	0.49118	0.291378	77.6104
1	1658.5	41.9818	3.69927	0.161893	0.601465	0.367288	64.5082
1	1155	46.3205	4.35309	0.112745	0.490582	0.290104	67.1058
1	1158.5	25.572	4.63673	0.113086	0.507365	0.295978	52.3474
1	1403	44.8114	4.13184	0.136953	0.563703	0.295198	79.2171
1	1311.5	27.6265	4.33121	0.128021	0.552468	0.303703	61.7974
1	923.5	26.4361	4.69975	0.0901469	0.423427	0.262329	85.3453
1	1203	26.4764	4.20701	0.11743	0.493671	0.278828	61.6215
1	1012	38.2533	4.8987	0.0987858	0.474503	0.242425	57.5724
1	1378.5	35.8542	4.20776	0.134561	0.563621	0.291778	87.4207
1	1290.5	50.6501	4.33605	0.125971	0.543981	0.303553	80.9988
1	1237	18.0337	4.70078	0.120749	0.567307	0.275929	84.0388
1	1170.5	44.0053	4.43519	0.114258	0.505614	0.30102	61.6525
1	1087	18.9453	4.48797	0.106107	0.483758	0.299349	51.9323
1	1312	23.8901	4.39923	0.12807	0.56262	0.308397	54.2175
1	1018	34.9085	4.73988	0.0993715	0.471064	0.293395	73.3308
1	991	38.9287	4.61904	0.0967359	0.452721	0.280234	43.7141
1	1097.5	9.84931	4.61727	0.107132	0.494464	0.310244	66.0333
1	1080	21.8053	4.20653	0.105424	0.443669	0.306916	75.3227
1	774	24.5874	5.52385	0.0755535	0.419633	0.224101	89.1002
1	1093.5	38.6636	4.67313	0.106741	0.493536	0.262995	82.962
1	1039.5	10.9411	4.6428	0.10147	0.471385	0.282525	77.2775
1	885	48.4541	5.63275	0.0863887	0.488889	0.24288	71.4076
1	1347.5	51.9383	4.06016	0.131535	0.531365	0.299837	82.7753
1	1193	30.5133	4.20353	0.116454	0.484796	0.314051	71.9334
1	1122.5	25.2564	4.38965	0.109572	0.481044	0.279674	67.0957
1	935.5	50.8182	4.4406	0.0913183	0.405763	0.307314	57.5172
1	1298.5	16.9271	3.97615	0.126752	0.502041	0.309578	76.6331
1	867.5	8.44805	5.25726	0.0846805	0.45312	0.272975	48.448
1	1089.5	23.4595	4.70916	0.106351	0.498413	0.262726	67.6122
1	1282	50.1438	4.03729	0.125142	0.504895	0.288034	77.2168
1	824	38.9782	5.45151	0.0804343	0.439878	0.26228	68.3051
1	1199.5	27.9261	4.16874	0.117088	0.484665	0.321665	78.8297
1	1119	66.6479	5.99578	0.109231	0.652746	0.2551	81.6707
1	1263.5	63.2573	4.72723	0.123336	0.574645	0.294329	80.233
1	1415.5	27.0414	4.12437	0.138173	0.569877	0.312199	82.7755
1	1077	30.4425	4.39423	0.105131	0.463016	0.317128	66.9408
1	916.5	37.6118	5.30064	0.0894636	0.471909	0.242767	48.7479
1	1152	23.4496	4.64911	0.112452	0.516446	0.287756	84.2092
1	1134.5	29.5203	4.31665	0.110744	0.479288	0.300608	77.4542
1	1061	48.453	4.32512	0.103569	0.447336	0.261908	77.0716
1	1424.5	23.654	3.88042	0.139052	0.539187	0.347321	88.4853
1	1083.5	33.7109	4.58273	0.105765	0.482355	0.299428	72.5878
1	958.5	22.7287	4.70272	0.0935634	0.437918	0.276855	69.4251
1	953.5	50.5801	4.90822	0.0930753	0.460409	0.288335	60.4199
1	1094.5	29.5899	4.75078	0.106839	0.503262	0.261447	76.0404
1	1298	22.2687	4.20863	0.126703	0.533231	0.280554	82.13
1	1057	33.4674	4.38084	0.103178	0.445882	0.285783	76.142
1	1114	48.9857	4.50644	0.108742	0.490055	0.276358	69.5491
1	1084	45.3702	4.25674	0.105814	0.450593	0.306461	76.4591
1	1145	14.3029	4.4514	0.111768	0.496314	0.272929	87.169
1	1373	70.0187	4.06197	0.134025	0.543504	0.30088	71.1278
1	1077	45.9828	4.17214	0.105131	0.437484	0.293625	52.5441
1	1418	22.2115	4.08293	0.138417	0.559667	0.296277	85.8554
1	1170	41.7956	4.33452	0.114209	0.490569	0.295613	84.3453
1	1054	38.4982	4.20842	0.102886	0.432375	0.306579	81.0669
1	1293	22.2971	3.75979	0.126215	0.473362	0.31886	79.093
1	1403.5	33.4136	4.21468	0.137002	0.556622	0.303615	78.5501
1	1490	51.0196	3.98454	0.145445	0.577701	0.31122	83.56
1	1097.5	40.42	4.57705	0.107132	0.490267	0.299956	64.0532
1	1190	37.7192	4.17355	0.116161	0.481721	0.303471	82.3525
1	956	31.0678	4.67106	0.0933194	0.429902	0.272079	39.1468
1	989	24.6687	4.39371	0.0965406	0.423881	0.291002	64.6389
1	920.5	36.6664	4.96671	0.0898541	0.446494	0.269393	75.5933
1	880.5	38.1657	5.01994	0.0859495	0.428449	0.299507	30.4428
1	1246	37.5731	4.23904	0.121628	0.517221	0.299936	71.7654
1	961	28.5975	4.79778	0.0938074	0.446187	0.274298	77.7597
1	1139.5	17.8621	4.45499	0.111232	0.48911	0.272111	82.1899
1	1276.5	33.344	4.32537	0.124605	0.53724	0.29285	82.6665
1	1201	49.8909	4.7226	0.117235	0.550083	0.282394	53.8483
1	1033.5	39.8289	4.52373	0.100884	0.453611	0.293224	61.141
1	1021.5	26.7045	4.69964	0.0997131	0.471321	0.274388	81.4609
1	990.5	41.0433	4.60527	0.0966871	0.451031	0.287201	64.8889
1	913	24.3935	4.76382	0.0891219	0.425003	0.28641	39.2381
1	968	37.0581	4.73159	0.0944907	0.442647	0.282433	67.3791
1	998.5	8.00026	4.46516	0.097468	0.438115	0.286869	83.6051
1	1064.5	24.5076	4.8536	0.103911	0.500917	0.256091	87.1378
1	1043	13.4067	4.77898	0.101812	0.479198	0.2762	79.0408
1	972	41.6199	4.76855	0.0948812	0.450233	0.286838	39.3036
1	1051.5	44.4647	4.67155	0.102642	0.474961	0.273551	81.9525
1	1131.5	85.9886	4.65281	0.110451	0.51592	0.288662	75.6755
1	1150	37.66	4.41095	0.112257	0.494805	0.290467	75.2621
1	1377.5	40.0611	4.0829	0.134464	0.542005	0.297411	59.1647
1	826	23.0915	5.08788	0.0806295	0.416616	0.280658	72.3156
1	1016	10.8471	4.31231	0.0991762	0.431902	0.283153	54.1987
1	912.5	32.5476	5.31019	0.0890731	0.468868	0.271296	58.6039
1	1268	47.4066	4.16689	0.123775	0.506573	0.281879	73.6953
1	1255	21.7903	4.64747	0.122506	0.557224	0.288091	85.2588
1	1074.5	33.6351	4.76181	0.104887	0.49915	0.262235	81.5224
1	1138.5	20.242	4.08263	0.111134	0.454276	0.284195	74.7306
1	1823.5	71.3889	4.88905	0.178	0.870641	0.340653	60.1776
1	1136	45.094	4.59466	0.11089	0.497399	0.300833	48.265
1	870.5	34.4951	4.74155	0.0849733	0.393067	0.261307	59.7772
1	1014.5	20.482	4.84299	0.0990298	0.480046	0.27456	78.6088
1	752.5	32.6366	6.0918	0.0734548	0.455766	0.233788	48.823
1	1042.5	38.0675	4.87654	0.101763	0.491959	0.26206	66.4705
1	1059	14.1038	4.65458	0.103374	0.482277	0.305089	81.7277
1	1104	20.2504	4.47575	0.107766	0.480963	0.291542	77.0692
1	1425.5	28.303	3.99933	0.139149	0.556608	0.306254	74.9211
1	1306.5	25.633	4.11749	0.127533	0.524906	0.300096	80.4785
1	1536.5	33.8388	3.96396	0.149985	0.594852	0.29801	74.798
1	974.5	11.3568	4.77125	0.0951252	0.443077	0.272166	80.1831
1	1085	18.5155	4.61067	0.105912	0.467223	0.267916	68.0465
1	1168.5	44.5402	4.30479	0.114062	0.488532	0.305187	81.9962
1	665	19.6326	6.11895	0.0649136	0.397297	0.204871	83.6737
1	1024.5	21.3801	4.7979	0.100006	0.473127	0.27934	75.7929
1	1086.5	18.8046	4.30601	0.106058	0.454418	0.307473	72.2871
1	1205.5	18.8676	4.35505	0.117674	0.513042	0.311601	65.6812
1	926	17.9356	5.28302	0.0903909	0.478284	0.30889	67.8093
1	1191	50.7683	4.6183	0.116259	0.539669	0.306878	69.4922
1	1040	49.3316	4.7002	0.101519	0.475903	0.283358	60.2851
1	1154	17.6323	4.19804	0.112647	0.470604	0.2863	65.9146
1	1352	35.7969	4.24554	0.131975	0.558045	0.315292	80.1634
1	1185	53.4216	4.51566	0.115673	0.521695	0.278094	70.1511
1	1105.5	45.0128	4.25375	0.107913	0.459059	0.322293	54.905
1	969	27.8071	4.84986	0.0945884	0.456805	0.26487	78.6577
1	1186.5	34.1123	4.91575	0.115819	0.567528	0.297619	78.904
1	1217.5	66.0322	4.21801	0.118846	0.503756	0.304667	78.3515
1	1191.5	29.023	4.25366	0.116308	0.499819	0.303325	83.5531
1	1343	41.8043	4.25848	0.131096	0.55857	0.291789	77.4043
1	875.5	32.5301	5.12976	0.0854614	0.438311	0.276827	60.69
1	1121.5	47.5976	4.35709	0.109475	0.475626	0.272295	74.8484
1	781	14.7052	5.63745	0.0762368	0.436678	0.241879	82.1457
1	887.5	20.0288	5.38313	0.0866328	0.466171	0.230121	86.1736
1	1294	22.8291	4.26261	0.126313	0.538514	0.293046	75.649
1	1147	29.4287	4.56956	0.111964	0.507345	0.285062	68.2839
1	1060.5	30.5853	4.87706	0.10352	0.502242	0.273269	66.4395
1	1121.5	23.0862	4.50859	0.109475	0.489852	0.280754	78.1754
1	942	41.2044	4.77534	0.0919528	0.43062	0.271344	66.4822
1	1015.5	37.7478	4.84613	0.0991274	0.484894	0.278798	38.2696
1	1140.5	24.7321	4.81739	0.111329	0.525832	0.262687	63.7973
1	867.5	26.3919	5.21721	0.0846805	0.440834	0.271664	60.0018
1	846	9.96813	5.06689	0.0825818	0.418143	0.239431	73.2151
1	1086	39.9356	4.67305	0.106009	0.493147	0.282547	83.1135
1	1251	27.5028	4.22531	0.122116	0.512408	0.305113	80.9343
1	995.5	24.6606	4.792	0.0971751	0.465778	0.267266	84.3582
1	1218	27.5079	4.30121	0.118894	0.50719	0.30102	62.5633
1	1056	16.5885	4.4546	0.103081	0.450683	0.301502	69.8959
1	1013.5	67.5673	4.85886	0.0989322	0.474307	0.255415	59.0161
1	997	36.4129	4.57028	0.0973216	0.44422	0.281713	77.7346
1	807	36.3401	5.35837	0.0787748	0.42101	0.25849	72.9692
1	976.5	12.3344	4.70488	0.0953205	0.446426	0.248003	70.3308
1	1237	48.2912	4.22463	0.120749	0.508145	0.293084	78.209
1	877.5	37.9311	5.20841	0.0856566	0.440012	0.267668	49.2758
1	950.5	6.43028	4.72662	0.0927825	0.444285	0.282984	79.731
1	1599	38.8078	3.6649	0.156085	0.571861	0.340745	78.2534
1	1018	50.701	4.3332	0.0993715	0.429245	0.304117	47.0058
1	1322.5	45.0083	4.0811	0.129095	0.526828	0.303093	69.9345
1	1153	52.906	4.85248	0.112549	0.547245	0.311227	80.8651
1	1726	57.5352	3.30011	0.168482	0.55569	0.432735	53.9789
1	1069	25.3308	4.36607	0.10435	0.451615	0.291704	68.9605
1	897	32.9635	5.0109	0.0875601	0.438993	0.238825	54.5626
1	992	38.1917	5.33949	0.0968335	0.517895	0.255031	76.3507
1	780	38.5995	6.07527	0.0761392	0.472536	0.246161	62.3573
1	1129	36.2644	4.30263	0.110207	0.46044	0.307212	60.4759
1	1611	18.9822	4.2448	0.157257	0.666168	0.296606	68.699
1	1080.5	35.7623	4.47082	0.105472	0.468866	0.276189	80.9172
1	874	28.3571	5.40839	0.085315	0.461922	0.245403	86.5403
1	1158	24.233	4.08793	0.113037	0.467332	0.303039	70.7632
1	903	34.0911	5.34518	0.0881458	0.469986	0.261454	65.0669
1	1493	23.1575	4.07473	0.145738	0.590236	0.304961	80.4146
1	1111	56.1943	4.30469	0.10845	0.466441	0.294735	65.706
1	1201	22.5684	3.95607	0.117235	0.463627	0.330004	78.6551
1	1124	28.8142	4.84238	0.109719	0.528564	0.269475	71.3666
1	1003	44.8151	5.31121	0.0979072	0.518023	0.272213	83.8815
1	1006.5	28.8962	4.66278	0.0982489	0.46148	0.28234	37.0716
1	1091	55.5877	4.74142	0.106497	0.494916	0.292002	75.8143
1	1307	19.782	5.18715	0.127582	0.663716	0.286048	77.5578
1	1015.5	28.5561	4.33772	0.0991274	0.429362	0.302673	63.4785
1	1094.5	15.6311	4.26324	0.106839	0.457258	0.296955	66.909
1	1118	56.6274	4.56044	0.109133	0.473331	0.290809	72.3282
1	929.5	23.8644	5.07839	0.0907326	0.456995	0.265992	75.9299
1	1202.5	22.9036	4.31249	0.117381	0.506129	0.28508	66.0028
1	943.5	25.7327	4.57628	0.0920992	0.418927	0.294918	53.0916
1	1018.5	53.0064	5.12171	0.0994203	0.488858	0.274982	58.2002
1	995.5	62.4571	4.51474	0.0971751	0.439723	0.264128	85.3034
1	921.5	16.776	4.77589	0.0899517	0.422232	0.288974	46.9776
1	1307.5	54.8062	4.0198	0.127631	0.512193	0.311459	74.744
1	1001	36.3742	4.87656	0.097712	0.477215	0.286964	74.5082
1	853.5	49.002	5.31763	0.0833139	0.44265	0.23523	77.4453
1	1082.5	52.3177	4.831	0.105668	0.510666	0.270484	71.6204
1	1110.5	28.392	4.47668	0.108401	0.48432	0.291818	76.2684
1	985	31.5565	4.73017	0.0961502	0.451225	0.267396	54.7206
1	978.5	73.8131	5.17924	0.0955157	0.497157	0.263474	75.8145
1	881	26.4681	5.22077	0.0859983	0.449754	0.270962	74.2645
1	1236.5	31.3917	4.46636	0.1207	0.539465	0.303079	76.0189
1	696.5	21.6313	5.91797	0.0679884	0.402951	0.249708	87.0021
1	967	22.2667	4.91559	0.0943931	0.455881	0.254326	45.0844
1	635	15.2459	6.16024	0.0619851	0.384306	0.20027	58.7092
1	823.5	26.8115	5.27284	0.0803855	0.423005	0.243279	74.8078
1	821	32.0525	5.75135	0.0801414	0.466755	0.244456	78.5789
1	1035	50.3428	4.60839	0.101031	0.463761	0.29257	57.9604
1	993.5	39.6866	4.67426	0.0969799	0.45282	0.287201	63.0932
1	1121.5	37.2753	4.42968	0.109475	0.483227	0.302929	80.3974
1	693	32.5424	7.34828	0.0676468	0.495524	0.228657	57.657
1	1315	40.4627	4.22486	0.128363	0.539101	0.307921	77.8212
1	1274.5	54.1732	3.90172	0.12441	0.48875	0.353599	41.8114
1	933.5	10.1421	4.82856	0.091123	0.440663	0.267849	55.5766
1	1116.5	12.2522	4.38735	0.108986	0.477801	0.304448	56.3572
1	1103.5	46.1005	4.32513	0.107717	0.4635	0.296501	59.187
1	778	57.0113	5.29631	0.075944	0.388179	0.227619	68.5964
1	1049	51.4738	4.74277	0.102398	0.485656	0.306056	57.9171
1	1071	53.6074	4.67105	0.104545	0.488423	0.291636	75.9009
1	811.5	12.9256	5.13806	0.0792141	0.406172	0.250919	73.7767
1	1324	46.2346	4.20731	0.129241	0.544188	0.267459	77.1702
1	1514.5	37.1766	5.09398	0.147837	0.751124	0.30945	83.8013
1	1335.5	40.3214	4.05622	0.130364	0.514096	0.316315	60.1738
1	1037	49.5899	4.99783	0.101226	0.500312	0.259417	82.1085
1	957	35.5236	4.91062	0.093417	0.452572	0.29595	61.7996
1	1097.5	35.6739	4.54841	0.107132	0.484942	0.282411	83.2954
1	967	12.305	4.97917	0.0943931	0.472254	0.259699	84.7521
1	1318.5	40.1042	3.5764	0.128705	0.460107	0.324929	67.4022
1	1015	50.3059	4.94847	0.0990786	0.486761	0.255491	79.7841
1	1189	41.73	4.39987	0.116064	0.510318	0.290716	83.7433
1	892.5	48.0137	5.50243	0.0871209	0.485455	0.262537	74.7449
1	1050.5	54.3956	4.28674	0.102544	0.438355	0.311297	79.127
1	921	54.7125	4.81621	0.0899029	0.432864	0.262214	51.6921
1	813	45.244	5.3616	0.0793605	0.424906	0.250894	61.5541
1	1176	30.0673	4.20414	0.114795	0.480551	0.310851	80.0763
1	1133	23.9933	4.42095	0.110597	0.491501	0.294911	75.5077
1	822.5	23.6062	6.38465	0.0802878	0.508787	0.230046	66.7124
1	1125.5	19.1251	4.02839	0.109865	0.439085	0.315416	52.3674
1	1089	41.6315	4.24397	0.106302	0.45185	0.286087	62.6052
1	1304.5	45.6425	3.96307	0.127338	0.503018	0.30695	78.0431
1	925.5	16.4081	5.24649	0.0903421	0.473469	0.263498	73.6833
1	1287.5	24.7595	4.02191	0.125679	0.505117	0.310618	74.5039
1	802	36.9113	5.76061	0.0782867	0.448837	0.235688	57.3734
1	1078.5	34.6139	4.40158	0.105277	0.462099	0.29851	76.2962
1	965.5	26.7385	4.65871	0.0942467	0.441407	0.294343	85.0906
1	1026.5	13.2183	4.21261	0.100201	0.418106	0.301751	77.7609
1	1163	18.4945	4.58054	0.113526	0.516366	0.286392	72.1286
1	1028.5	19.8916	4.84315	0.100396	0.485362	0.289955	68.9813
1	996	25.0703	4.8238	0.0972239	0.47115	0.277102	50.3654
1	944	24.2288	5.04669	0.092148	0.460151	0.260621	79.9089
1	1014	30.4921	4.4302	0.098981	0.440188	0.292772	80.1074
1	1122.5	32.8828	4.62432	0.109572	0.507474	0.310428	74.3554
1	1049.5	17.0048	4.15161	0.102446	0.4227	0.31426	53.3359
1	781.5	37.4449	5.62689	0.0762857	0.429646	0.25132	73.8362
1	1164	26.6855	3.98895	0.113623	0.451525	0.315851	76.9325
1	802.5	28.614	5.1824	0.0783356	0.407703	0.250759	67.1182
1	1141	23.8777	4.53101	0.111378	0.500184	0.296182	77.5922
1	1007	36.3774	4.51925	0.0982977	0.431773	0.281417	64.622
1	1094.5	31.9069	4.4156	0.106839	0.467327	0.296573	44.9632
1	958	35.8067	5.28021	0.0935146	0.493859	0.281625	45.0575
1	1081.5	41.8623	4.74717	0.10557	0.49399	0.254613	84.806
1	944	16.2046	4.38844	0.092148	0.401636	0.296874	74.1704
1	1251.5	35.3546	4.23203	0.122164	0.497571	0.311634	60.3118
1	701	43.3314	7.90241	0.0684277	0.538101	0.217023	70.477
1	1088.5	39.1704	4.83414	0.106253	0.50523	0.281213	55.5737
1	1081	23.0263	4.46339	0.105521	0.46922	0.305164	79.0802
1	1129.5	40.745	4.36457	0.110255	0.480262	0.297969	80.3973
1	1178.5	33.6413	4.39818	0.115039	0.506812	0.316432	71.4604
1	1015	40.3179	4.81894	0.0990786	0.466047	0.282794	87.9677
1	1104	32.1516	4.42876	0.107766	0.480917	0.279541	55.0636
1	1304.5	40.3712	4.2866	0.127338	0.53993	0.267986	74.8383
1	951.5	53.7202	5.11563	0.0928801	0.470961	0.282876	47.0186
1	1004.5	39.715	4.96167	0.0980537	0.474828	0.28737	79.1131
1	1582	46.5658	4.05787	0.154426	0.62702	0.311538	74.5701
1	1114.5	31.5283	4.60818	0.108791	0.50495	0.296102	79.9479
1	1380	49.9075	3.75235	0.134708	0.504595	0.331339	57.8251
1	924	43.8727	5.05133	0.0901957	0.465422	0.265809	48.1668
1	870	54.5306	5.44206	0.0849245	0.467494	0.231748	76.8032
1	966.5	15.845	4.69466	0.0943443	0.443179	0.2736	72.2636
1	879	28.2315	5.15038	0.0858031	0.44043	0.272429	46.7278
1	1118	33.4559	4.46567	0.109133	0.487796	0.292137	71.7163
1	978.5	35.8563	4.51465	0.0955157	0.429673	0.304818	56.9455
1	822.5	19.5174	5.17361	0.0802878	0.416347	0.237757	58.8206
1	1190.5	37.8907	4.53317	0.11621	0.522135	0.297685	72.3881
1	1236.5	20.2697	4.29517	0.1207	0.501989	0.303045	63.6252
1	1269.5	54.1315	3.97282	0.123921	0.493304	0.323616	62.0016
1	1234.5	31.0255	4.3863	0.120505	0.529083	0.276578	81.638
1	1089	26.0844	4.53393	0.106302	0.481221	0.274411	68.3085
1	1004	70.032	4.99112	0.0980049	0.489163	0.298092	82.6463
1	1154	29.0629	5.25343	0.112647	0.5921	0.286608	71.6171
1	892.5	9.41379	4.66735	0.0871208	0.409222	0.279308	70.9069
1	1107.5	38.6933	4.70488	0.108108	0.505631	0.284393	72.5224
1	810	34.7254	5.49603	0.0790677	0.439882	0.226689	47.8088
1	1226.5	46.7332	4.47218	0.119724	0.535653	0.306227	83.8603
1	1131	49.5163	4.5131	0.110402	0.498255	0.304935	52.3003
1	1011.5	13.5804	4.51063	0.098737	0.445499	0.292307	61.4214
1	941	16.0488	4.67767	0.0918552	0.429342	0.270004	64.5231
1	1008	23.5078	4.64995	0.0983953	0.456338	0.280957	66.9237
1	1131.5	20.3496	4.32005	0.110451	0.475171	0.275207	73.5196
1	1120	46.5477	4.89886	0.109328	0.519942	0.287814	73.1259
1	1226.5	42.8867	3.96542	0.119724	0.475987	0.30835	80.6851
1	1055.5	32.7488	4.67965	0.103032	0.482088	0.304784	64.942
1	1632	36.914	3.98384	0.159307	0.639074	0.334093	78.2754
1	859.5	19.1267	5.08319	0.0838996	0.429211	0.254966	68.9559
1	879.5	56.0607	5.17741	0.0858519	0.447123	0.239774	60.0224
1	983.5	50.4526	4.78022	0.0960038	0.442752	0.260958	76.5341
1	950.5	15.5078	4.26628	0.0927825	0.395136	0.291052	68.6925
1	1269.5	34.301	4.46086	0.123921	0.549003	0.303675	72.0162
1	1233.5	49.8397	4.07157	0.120407	0.487764	0.316899	68.3698
1	1171	22.5896	4.00184	0.114306	0.457004	0.324211	56.6823
1	884	9.72752	5.32807	0.0862911	0.459818	0.247744	81.5566
1	747.5	39.769	6.79664	0.0729668	0.498368	0.210489	77.7248
1	1145.5	24.2435	4.46755	0.111817	0.504739	0.298753	74.7388
1	746.5	62.225	6.60029	0.0728692	0.481183	0.204405	87.0974
1	1199	46.5127	4.17126	0.11704	0.494043	0.310338	70.6637
1	1322	44.4128	4.18922	0.129046	0.539517	0.324418	62.4114
1	1187	22.5658	4.35799	0.115868	0.504221	0.281296	72.2495
1	1432	44.772	4.72643	0.139784	0.660566	0.286608	80.2227
1	1146.5	36.3326	4.4709	0.111915	0.498957	0.279672	77.7326
1	955	24.7466	6.09251	0.0932218	0.569606	0.212302	71.1834
1	877	37.2262	4.72343	0.0856078	0.406344	0.278717	77.473
1	945	27.3979	4.74905	0.0922456	0.429973	0.268729	75.8987
1	955.5	32.6869	5.39703	0.0932706	0.50201	0.258486	67.1056
1	864.5	50.8534	5.55977	0.0843876	0.461756	0.224959	71.2432
1	952.5	56.2289	4.93215	0.0929777	0.4619	0.282047	60.1052
1	733.5	31.9059	6.14111	0.0716002	0.442508	0.237747	43.4773
1	1064	27.3803	4.59414	0.103862	0.470024	0.308428	56.4693
1	1343.5	29.4732	5.018	0.131145	0.644532	0.294685	72.6625
1	1048	21.1407	4.63528	0.1023	0.476398	0.285493	74.9348
1	1125	78.7806	4.7775	0.109816	0.521239	0.278713	79.5116
1	1235.5	23.5575	4.32611	0.120603	0.520477	0.309293	74.4175
1	1202	27.2016	4.29678	0.117333	0.50609	0.319228	73.8759
1	1133.5	31.8006	4.3135	0.110646	0.481966	0.290975	71.545
1	956.5	19.5043	5.07668	0.0933682	0.468581	0.246292	60.4396
1	885.5	37.0635	5.6607	0.0864376	0.466383	0.260147	77.7143
1	837	26.4469	5.57347	0.0817032	0.452196	0.236188	86.1859
1	994	43.6354	5.00043	0.0970287	0.491148	0.270574	68.7347
1	1120.5	56.246	4.33048	0.109377	0.475176	0.306768	83.1437
1	996	44.5468	4.75237	0.0972239	0.454137	0.30288	74.8195
1	1018.5	37.9011	4.60994	0.0994203	0.459239	0.282273	62.521
1	901.5	29.3765	5.22228	0.0879994	0.455507	0.25997	70.8866
1	1267.5	22.8614	3.85881	0.123726	0.471771	0.340787	54.9287
1	908.5	16.1915	5.04685	0.0886827	0.447639	0.262823	73.8606
1	1304	60.8	4.83287	0.127289	0.615483	0.302904	81.4758
1	1002	13.1566	5.30106	0.0978096	0.516598	0.2541	82.8118
1	1137	37.6167	4.45061	0.110988	0.496568	0.277872	86.9057
1	1077.5	62.4345	4.98931	0.10518	0.515953	0.268855	52.2124
1	979	16.7786	4.7537	0.0955645	0.452119	0.29184	76.4663
1	1034	70.8038	5.06793	0.100933	0.514678	0.272791	69.6886
1	1135	23.8919	4.71388	0.110792	0.524268	0.272908	79.4105
1	1080	34.3739	5.00196	0.105424	0.528311	0.281543	71.494
1	986.5	20.3818	5.1421	0.0962966	0.492663	0.256459	83.3007
1	1111.5	27.2776	4.45929	0.108498	0.479316	0.286964	79.273
1	631.5	19.3032	6.19847	0.0616435	0.383499	0.210126	73.7866
1	793	36.8784	5.35857	0.0774082	0.417477	0.252159	69.3061
1	1147.5	64.4577	4.6509	0.112013	0.520265	0.293316	81.8814
1	678.5	58.441	5.82838	0.0662314	0.377655	0.220615	70.3877
1	1171	47.857	4.69758	0.114306	0.539459	0.300685	80.8744
1	1066.5	50.5088	4.52291	0.104106	0.471889	0.284341	69.9446
1	977	36.7109	4.83535	0.0953693	0.456697	0.282039	57.9862
1	953	26.2206	4.69417	0.0930265	0.436456	0.262965	76.5288
1	1150.5	17.2347	4.0547	0.112305	0.457746	0.312013	79.0849
1	1286	40.4917	4.60758	0.125532	0.559517	0.278563	77.3856
1	911	41.2762	4.87471	0.0889267	0.426817	0.274576	62.0291
1	1297	38.577	4.06699	0.126606	0.514698	0.318069	58.3349
1	1069.5	33.9327	5.00326	0.104399	0.523379	0.259699	57.1725
1	1299	31.2945	4.03206	0.126801	0.511717	0.317231	87.7645
1	892.5	35.7348	4.84389	0.0871208	0.417979	0.296483	76.5474
1	1209	49.967	4.21766	0.118016	0.498295	0.307351	84.2578
1	1103.5	17.9679	4.40972	0.107717	0.472181	0.299495	67.3377
1	771	53.2014	5.89184	0.0752607	0.443056	0.209732	78.8761
1	1432.5	28.3104	4.07847	0.139833	0.571235	0.299704	84.9197
1	792	12.6288	5.64655	0.0773106	0.429111	0.235892	72.309
1	1344	27.7512	4.59203	0.131194	0.606216	0.303093	52.7976
1	1009	36.2172	4.94466	0.0984929	0.475555	0.25638	68.3016
1	1086.5	22.3783	4.52279	0.106058	0.480898	0.298773	60.9015
1	978	39.3991	4.4544	0.0954669	0.419289	0.297685	70.9239
1	882.5	34.4483	5.32321	0.0861447	0.460002	0.244017	75.0853
1	930	24.0238	5.10837	0.0907814	0.471881	0.256612	80.9024
1	996.5	48.3436	4.61034	0.0972727	0.443107	0.276717	72.7239
1	1377.5	48.0981	4.76092	0.134464	0.640725	0.268249	78.7018
1	1079.5	20.4089	4.33175	0.105375	0.447172	0.334985	58.7995
1	987	46.0517	4.76728	0.0963454	0.459572	0.281184	61.8856
1	952.5	58.2997	5.14831	0.0929777	0.460525	0.256786	63.9683
1	976.5	41.0886	4.84993	0.0953205	0.464212	0.266052	53.4452
1	996	55.3953	4.70016	0.0972239	0.456323	0.27619	73.3036
1	1063.5	21.2979	4.5632	0.103813	0.472988	0.288253	67.0607
1	1043	50.4459	4.58957	0.101812	0.468039	0.296565	59.7244
1	1097	43.0955	4.41618	0.107083	0.47584	0.318992	66.2965
1	1158.5	34.8828	4.43505	0.113086	0.500648	0.312937	57.8554
1	1101	16.4236	4.25636	0.107473	0.457802	0.280677	85.2723
1	1026	31.8159	4.53674	0.100152	0.452646	0.282083	77.466
1	1146	17.4549	4.40576	0.111866	0.492398	0.30103	78.0687
1	1044	12.5401	4.52689	0.101909	0.461517	0.281754	72.5095
1	1147.5	41.5967	4.41752	0.112013	0.497217	0.291155	83.9964
1	1137.5	35.9146	4.64199	0.111036	0.515032	0.286526	69.2158
1	769.5	13.7014	5.36933	0.0751143	0.401902	0.268307	61.9118
1	1020	50.3769	4.65623	0.0995667	0.468467	0.299817	78.877
1	1183	57.1167	4.31291	0.115478	0.498198	0.311556	78.5625
1	1183.5	35.7202	4.59985	0.115527	0.524936	0.285988	85.4829
1	1291	28.1925	4.23714	0.12602	0.533554	0.301207	72.0015
1	1067.5	40.688	4.64245	0.104203	0.484558	0.299573	66.7441
1	1162	54.5712	4.43933	0.113428	0.505335	0.313121	68.3819
1	800	38.8332	5.65131	0.0780915	0.437974	0.233429	83.9188
1	1447.5	22.1351	3.93924	0.141297	0.55585	0.306459	84.5591
1	1361	14.1709	3.77863	0.132853	0.501209	0.309818	74.8968
1	1254	67.8056	5.37727	0.122408	0.661323	0.344848	63.9132
1	991.5	32.9687	5.10515	0.0967847	0.493242	0.260089	76.3663
1	1129	29.6775	4.13674	0.110207	0.457638	0.302026	75.4131
1	1034.5	12.272	4.65769	0.100982	0.470348	0.278132	73.8927
1	895.5	17.0604	5.6805	0.0874137	0.495143	0.232642	85.8709
1	872	18.2003	5.05115	0.0851198	0.432185	0.260885	82.6018
1	1228	21.8458	4.14785	0.11987	0.49715	0.331127	79.2375
1	853	22.4314	4.90606	0.0832651	0.408023	0.257042	78.1253
1	958.5	21.6215	5.0502	0.0935634	0.473356	0.274028	61.8966
1	1113	22.8184	4.7659	0.108645	0.515406	0.274932	59.1082
1	1063	26.486	4.97539	0.103764	0.513076	0.272552	83.8254
1	892.5	40.0625	4.91862	0.0871208	0.430186	0.261374	66.3243
1	1086.5	16.6858	4.6371	0.106058	0.488235	0.300428	62.2961
1	1047	24.844	4.88328	0.102202	0.500243	0.287756	54.6085
1	998	33.3633	4.84256	0.0974192	0.464048	0.278869	82.3724
1	1000	24.752	4.67563	0.0976144	0.443715	0.288372	76.3477
1	1105	30.1721	4.37736	0.107864	0.466921	0.306244	74.6121
1	1074.5	63.6489	4.87689	0.104887	0.509554	0.272951	71.2795
1	954.5	49.9074	4.2518	0.0931729	0.394324	0.295837	59.5106
1	747.5	25.7019	5.41575	0.0729668	0.396004	0.244902	74.2669
1	1066.5	25.8895	4.74976	0.104106	0.495931	0.267354	85.9294
1	1281.5	64.9913	4.069	0.125093	0.508233	0.321753	50.7619
1	1121.5	39.4875	4.38873	0.109475	0.474899	0.275433	75.4575
1	953.5	43.6473	5.20876	0.0930753	0.48439	0.262995	83.7171
1	1106	25.121	4.64904	0.107962	0.504226	0.275416	82.9698
1	1062.5	43.0851	4.79391	0.103715	0.491182	0.266651	68.4442
1	1321.5	27.5803	4.37576	0.128997	0.552457	0.291698	83.9628
1	913.5	23.437	5.47842	0.0891708	0.488364	0.232521	82.3724
1	937.5	35.8535	5.223	0.0915135	0.481757	0.250655	65.7569
1	1137.5	35.813	4.61623	0.111036	0.511033	0.277608	77.5341
1	1126	39.9488	4.5996	0.109914	0.507776	0.293056	71.6179
1	1026	13.1381	4.63597	0.100152	0.467788	0.279064	83.2403
1	1169.5	39.4296	4.30012	0.11416	0.492614	0.29674	64.6518
1	1386	47.6969	3.81597	0.135294	0.516236	0.329421	64.3645
1	898	18.8286	4.70796	0.0876577	0.412666	0.285076	69.778
1	975	41.0054	4.93352	0.095174	0.470978	0.278333	74.3252
1	1090.5	18.3197	5.21809	0.106449	0.543619	0.275248	81.7893
1	1429.5	64.4424	3.89159	0.13954	0.542311	0.338869	85.5898
1	1211	21.0394	4.27171	0.118211	0.503249	0.289901	75.5337
1	1125.5	35.1414	4.53964	0.109865	0.49728	0.291704	72.7206
1	1142.5	47.6973	4.47774	0.111524	0.501932	0.294856	86.7062
1	1126.5	23.2302	4.43507	0.109963	0.491136	0.312244	64.7045
1	1453	29.5715	4.82469	0.141834	0.682233	0.28889	83.1072
1	1129	54.7843	4.61865	0.110207	0.506402	0.282133	33.5705
1	1013	17.9528	4.32296	0.0988834	0.42591	0.292653	68.5073
1	1211	67.6258	4.43243	0.118211	0.524678	0.3192	72.7291
1	1107.5	48.5024	4.61895	0.108108	0.495747	0.311022	57.621
1	1152.5	71.8997	4.45245	0.112501	0.505302	0.281795	85.1014
1	1162.5	52.1807	4.11473	0.113477	0.466176	0.315039	71.012
1	959.5	31.1189	4.69844	0.093661	0.442444	0.273353	78.0584
1	1052.5	42.4289	4.67344	0.102739	0.475068	0.296936	80.1238
1	1160.5	32.5128	4.43613	0.113282	0.506336	0.291883	65.1335
1	968	47.713	4.39026	0.0944907	0.416049	0.283848	75.7857
1	1036.5	21.0394	4.85239	0.101177	0.495469	0.285837	80.4342
1	1208	14.2519	5.55279	0.117918	0.669506	0.24752	76.634
1	985.5	21.146	4.80847	0.096199	0.468048	0.288099	71.0625
1	958	68.5546	4.79796	0.0935146	0.448749	0.264052	62.9159
1	1014	68.046	4.80542	0.098981	0.479269	0.25359	63.2622
1	1139.5	48.1114	4.46935	0.111232	0.491289	0.288049	66.3477
1	1167	61.5358	4.52068	0.113916	0.520059	0.284283	87.7612
1	1034	38.3868	4.54341	0.100933	0.456952	0.287857	74.2468
1	1183	50.1	4.26162	0.115478	0.490569	0.295077	72.8053
1	1092	9.24246	4.46616	0.106595	0.477816	0.280803	70.8737
1	1042.5	49.1889	4.54132	0.101763	0.455136	0.288151	65.3061
1	1611.5	30.0916	4.31325	0.157306	0.682493	0.30033	87.4275
1	861.5	39.4385	5.56104	0.0840948	0.469838	0.256612	78.9136
1	1244.5	24.5077	4.04372	0.121481	0.491292	0.337712	62.4579
1	927.5	35.0633	5.17713	0.0905374	0.463014	0.253998	67.4401
1	953.5	41.1392	5.30573	0.0930753	0.49467	0.278951	84.8276
1	937.5	52.9158	5.42383	0.0915135	0.491003	0.26162	70.3061
1	973.5	59.4949	4.8327	0.0950276	0.454882	0.271847	54.0464
1	1299.5	58.1271	4.12283	0.12685	0.521323	0.303165	78.3173
1	1182.5	34.0627	4.21674	0.115429	0.485321	0.305938	68.9183
1	1351.5	78.7819	3.75527	0.131926	0.495232	0.303636	74.2825
1	1002.5	78.5072	4.98202	0.0978584	0.483976	0.292211	52.6015
1	1122.5	58.6827	4.51987	0.109572	0.498811	0.312413	69.0219
1	1307.5	51.5446	4.40897	0.127631	0.566811	0.304331	79.7458
1	1062	31.174	4.61953	0.103666	0.478257	0.284119	75.3081
1	1093.5	13.918	4.37369	0.106741	0.465784	0.287455	68.5397
1	807.5	29.6011	5.44627	0.0788236	0.429165	0.268557	59.8781
1	1006.5	36.7646	4.7879	0.0982489	0.469534	0.289829	68.4132
1	1256	25.0222	3.86432	0.122604	0.476055	0.333978	66.4476
1	1206.5	27.219	4.58534	0.117772	0.536699	0.269794	73.7644
1	1180.5	57.0936	4.31495	0.115234	0.500865	0.301703	81.1953
1	1084	46.2261	6.1191	0.105814	0.641881	0.239142	76.6333
1	907	21.2214	5.08616	0.0885363	0.45034	0.242203	70.1573
1	1143.5	35.2133	3.95413	0.111622	0.444771	0.306347	38.4655
1	1265.5	31.0274	4.04392	0.123531	0.499908	0.296606	73.8252
1	1079.5	25.7604	4.45576	0.105375	0.468831	0.292464	73.4914
1	1383	27.5968	4.21214	0.135001	0.568075	0.290071	73.6331
1	1009.5	35.9478	4.81285	0.0985417	0.465271	0.276587	67.5933
1	1067	39.5701	4.56552	0.104155	0.469771	0.293176	65.3663
1	1094.5	70.5386	4.61518	0.106839	0.492504	0.309499	79.377
1	1100.5	48.8923	4.66306	0.107425	0.501867	0.293601	63.4174
1	898.5	25.9283	5.1764	0.0877065	0.453768	0.259299	83.4498
1	1046	23.5771	4.85578	0.102105	0.493892	0.279336	77.0758
1	1039.5	23.8364	4.40527	0.10147	0.442293	0.304594	80.2471
1	1252.5	38.3431	4.44852	0.122262	0.545433	0.312936	83.1573
1	1160.5	30.2119	4.49298	0.113282	0.509207	0.28351	82.1129
1	1195.5	48.5125	5.90353	0.116698	0.688912	0.276546	68.8776
1	1237.5	36.041	4.22635	0.120798	0.512496	0.318387	73.0835
1	1323.5	31.9166	4.00457	0.129193	0.508976	0.311801	74.8548
1	1049.5	71.917	5.08017	0.102446	0.518289	0.263742	67.7059
1	915.5	55.3371	4.94768	0.089366	0.442646	0.257045	76.9084
1	1085	46.5439	4.5129	0.105912	0.482763	0.277194	86.4348
1	943.5	33.1201	4.88463	0.0920992	0.450035	0.26228	65.1341
1	1234.5	19.3322	4.24817	0.120505	0.513119	0.30804	74.3025
1	1610	33.1342	3.81525	0.157159	0.580984	0.36508	57.8394
1	865.5	23.9977	4.81228	0.0844853	0.408982	0.269531	80.5614
1	908.5	60.515	5.22803	0.0886827	0.465132	0.288884	60.3632
1	1270.5	35.1642	3.77074	0.124019	0.465943	0.323144	76.5625
1	953.5	13.9355	4.7219	0.0930753	0.445834	0.294861	70.9595
1	1223	41.1395	4.23388	0.119382	0.504908	0.313189	65.0606
1	897.5	18.2178	4.85116	0.0876089	0.425979	0.263999	78.4114
1	918	28.6233	4.76531	0.08961	0.426431	0.270187	69.8342
1	1374.5	35.9422	3.73099	0.134171	0.500238	0.344312	67.6354
1	996	31.3376	4.56013	0.0972239	0.441999	0.288621	72.258
1	1177	27.1558	4.229	0.114892	0.488654	0.307466	61.0787
1	948.5	20.6591	4.58204	0.0925873	0.42347	0.304435	70.1655
1	1258.5	36.137	4.38057	0.122848	0.531369	0.296364	78.8428
1	1272.5	33.869	4.16434	0.124214	0.519485	0.283579	83.7322
1	1778.5	21.7325	3.64172	0.173607	0.624532	0.407478	64.2
1	924.5	9.33941	4.99783	0.0902445	0.454174	0.267449	84.1884
1	896.5	30.1619	5.0648	0.0875113	0.438061	0.250124	75.1877
1	1598.5	43.2403	3.86242	0.156037	0.605449	0.335192	58.3952
1	1050	59.7824	4.8862	0.102495	0.504424	0.281213	78.9096
1	1442	28.491	3.82659	0.14076	0.540927	0.360463	66.1956
1	977.5	61.432	4.86158	0.0954181	0.460019	0.266307	73.7776
1	1544	66.9449	4.53663	0.150717	0.684276	0.30359	64.5469
1	1486.5	20.4891	4.75015	0.145104	0.686711	0.285323	82.9139
1	997.5	37.7744	5.13421	0.0973704	0.500096	0.260021	76.58
1	937	25.9034	4.69182	0.0914647	0.42594	0.289695	68.5487
1	804	20.9147	5.47835	0.078482	0.427413	0.240413	88.0326
1	1357.5	33.6005	4.14839	0.132512	0.546999	0.310246	64.4555
1	1104	50.6725	4.88464	0.107766	0.520834	0.278642	80.706
1	1259.5	64.5189	4.0187	0.122945	0.494251	0.347969	44.868
1	1160.5	35.4468	4.17561	0.113282	0.476159	0.31042	57.7591
1	991.5	41.6794	5.01417	0.0967847	0.484165	0.260994	81.3089
1	1372	52.2722	4.14294	0.133927	0.552191	0.306597	85.8129
1	1511	35.4637	4.04642	0.147495	0.59665	0.324234	82.7649
1	912.5	34.3178	4.86228	0.0890731	0.432657	0.290848	65.4613
1	987.5	16.2268	4.38347	0.0963942	0.422359	0.291036	75.5201
1	923.5	68.93	5.02704	0.0901469	0.45627	0.254013	74.0597
1	885.5	24.337	5.36628	0.0864376	0.465376	0.237623	75.578
1	1187	21.3856	4.10896	0.115868	0.469833	0.308175	50.1524
1	875.5	62.85	5.51267	0.0854614	0.468063	0.249116	46.4228
1	1180.5	25.1751	4.48773	0.115234	0.519631	0.294424	84.0199
1	944.5	56.8873	4.78869	0.0921968	0.443534	0.290711	60.4387
1	916.5	35.9066	4.80675	0.0894636	0.432532	0.274759	69.3853
1	1298	32.0416	4.24408	0.126703	0.522227	0.317037	71.2877
1	1009	43.8132	4.33888	0.0984929	0.43149	0.291437	65.0299
1	1280.5	38.2015	4.22913	0.124995	0.515956	0.328491	71.9418
1	1219	46.3748	4.39574	0.118992	0.523109	0.284666	68.5459
1	1064.5	55.049	4.77387	0.103911	0.492244	0.287841	74.0438
1	958	49.779	5.25441	0.0935146	0.480741	0.28399	69.3199
1	915	23.6926	5.22832	0.0893172	0.469704	0.262531	53.9707
1	1063	21.2055	4.53094	0.103764	0.474202	0.276425	81.7247
1	1395	39.8305	4.04695	0.136172	0.549652	0.305532	69.1827
1	1018.5	49.4715	5.12821	0.0994203	0.51239	0.294099	59.8724
1	997	6.45204	5.36225	0.0973216	0.522346	0.267056	74.4059
1	1373.5	25.4738	4.39184	0.134073	0.568967	0.283594	84.2186
1	880.5	23.2532	5.26582	0.0859495	0.446275	0.257075	72.0064
1	1093	36.0258	4.56415	0.106693	0.487868	0.283624	63.7016
1	1162.5	32.9343	4.51617	0.113477	0.521744	0.304647	74.214
1	1148	41.3145	4.70916	0.112061	0.516121	0.297755	71.267
1	1189	44.4996	4.02559	0.116064	0.467734	0.315833	52.6526
1	1019	18.9685	4.8206	0.0994691	0.479517	0.251678	85.8152
1	1167.5	15.3131	4.48876	0.113965	0.51336	0.288012	74.8088
1	935.5	20.2379	4.97342	0.0913183	0.448622	0.271019	68.487
1	936.5	47.9098	4.90794	0.0914159	0.452423	0.263878	41.1273
1	1054.5	34.1194	4.39383	0.102934	0.454579	0.294749	55.5806
1	1329	22.0836	4.88101	0.12973	0.633203	0.292376	75.8439
1	1045	14.0526	5.04719	0.102007	0.516078	0.270962	86.2195
1	1006	10.7584	4.52246	0.0982001	0.446308	0.28784	78.347
1	1305	17.3203	4.43712	0.127387	0.563632	0.303318	81.4611
1	1121.5	14.2688	4.32818	0.109475	0.469286	0.288405	72.7179
1	1195.5	69.6333	3.79055	0.116698	0.444483	0.313807	63.2408
1	1350.5	24.0861	3.92481	0.131828	0.517386	0.313862	73.8098
1	966	42.896	4.85563	0.0942955	0.46418	0.266651	67.707
1	1222	17.8037	4.38625	0.119285	0.521552	0.283728	81.6036
1	919	23.7782	5.17416	0.0897076	0.465123	0.273773	73.92
1	1290	34.867	4.74066	0.125923	0.582445	0.300138	74.9357
1	1226	63.6678	4.56221	0.119675	0.543158	0.291427	66.8132
1	1149.5	61.5997	4.64074	0.112208	0.522719	0.321752	50.928
1	1055.5	39.9743	5.01748	0.103032	0.515935	0.243517	78.5436
1	1007.5	19.3831	4.35401	0.0983465	0.423723	0.271777	71.4256
1	1049.5	17.2827	4.92414	0.102446	0.502164	0.27645	75.7106
1	1386	58.9159	4.32149	0.135294	0.568608	0.291905	75.4727
1	1283.5	30.0271	4.20641	0.125288	0.532341	0.330643	80.5558
1	932.5	27.3391	4.91144	0.0910254	0.447004	0.263423	77.0913
1	1120.5	21.6766	4.61031	0.109377	0.504156	0.25688	80.5655
1	1291	37.3978	4.09707	0.12602	0.512716	0.310248	81.9392
1	1038.5	11.8985	4.95522	0.101373	0.487557	0.269215	75.8284
1	1229.5	19.7936	4.32667	0.120017	0.518625	0.297127	75.2804
1	1124.5	44.623	4.76302	0.109767	0.528343	0.284127	65.394
1	1279.5	54.9402	4.26933	0.124898	0.532078	0.302781	73.6127
1	1139	56.9084	4.33303	0.111183	0.470708	0.299804	54.829
1	1288.5	24.8435	4.04138	0.125776	0.506437	0.318064	58.2629
1	1257.5	22.3679	3.95753	0.12275	0.485504	0.334345	73.456
1	1018.5	30.0318	4.48153	0.0994203	0.445587	0.281213	69.7463
1	1275.5	46.8877	4.19239	0.124507	0.51925	0.295238	72.6599
1	994.5	12.3207	4.53093	0.0970775	0.441237	0.285285	40.0269
1	1162.5	12.6099	4.45803	0.113477	0.503139	0.292474	57.745
1	1032	19.0453	4.64477	0.100738	0.469931	0.282697	80.4383
1	1294	56.0697	4.19813	0.126313	0.528673	0.277273	81.7477
1	1216	25.575	4.6143	0.118699	0.541443	0.314743	79.1333
1	1284	36.6654	4.2161	0.125337	0.524477	0.313691	68.0287
1	1210.5	20.1364	4.23749	0.118162	0.499884	0.273694	76.9804
1	1296.5	31.4267	4.47453	0.126557	0.558351	0.2881	80.4121
1	1046	25.831	4.48545	0.102105	0.455248	0.287876	74.1872
1	1153	59.8425	4.22247	0.112549	0.47827	0.29843	52.1118
1	953.5	29.0318	4.72179	0.0930753	0.440752	0.281038	49.3896
1	1026.5	73.3205	4.48708	0.100201	0.44876	0.280897	58.7622
1	1159.5	42.0922	4.32213	0.113184	0.492804	0.320145	77.6617
1	1001.5	10.4017	4.93724	0.0977608	0.472808	0.26129	79.9417
1	1075.5	27.4082	4.34427	0.104984	0.457035	0.293754	74.3386
1	1194.5	28.9164	4.14941	0.1166	0.483353	0.325053	72.5763
1	890	33.9426	5.33785	0.0868768	0.463803	0.294633	79.4466
1	901	70.0424	5.24766	0.0879506	0.456874	0.26614	71.8138
1	1089	37.2906	4.7731	0.106302	0.506184	0.279031	90
1	1117	57.9702	4.6378	0.109035	0.503639	0.286177	73.8745
1	1300	14.5524	4.36758	0.126899	0.546179	0.306974	81.149
1	1317.5	71.1292	4.09996	0.128607	0.526436	0.304499	69.0634
1	1373.5	34.9071	4.1983	0.134073	0.562328	0.30235	75.1402
1	861	25.2485	5.08917	0.084046	0.425837	0.272911	74.2275
1	1329.5	43.7805	4.6264	0.129778	0.598227	0.292933	80.1493
1	1055.5	36.5651	4.57409	0.103032	0.476525	0.302318	72.6294
1	1257	33.1283	4.32604	0.122701	0.530284	0.299592	77.4856
1	1106	40.8607	4.47918	0.107962	0.480069	0.290972	73.7667
1	1448	42.8773	4.23134	0.141346	0.590369	0.294059	82.0104
1	834	45.6035	5.82056	0.0814104	0.469597	0.237534	85.8303
1	929.5	21.6745	5.03819	0.0907326	0.450639	0.285068	58.9843
1	1123.5	25.2473	4.34283	0.10967	0.472467	0.277405	68.504
1	1139.5	55.7803	4.6094	0.111232	0.513476	0.307839	68.0901
1	976	19.0836	5.07109	0.0952717	0.48387	0.274822	75.2327
1	1188	33.5276	4.52108	0.115966	0.52459	0.28759	75.4906
1	1017	25.3759	4.49384	0.0992738	0.444999	0.276828	75.0388
1	1161	34.1004	4.46864	0.11333	0.504865	0.334828	83.7338
1	1057.5	51.5682	4.13769	0.103227	0.429131	0.313791	45.3502
1	950	48.7113	5.66996	0.0927337	0.523825	0.232324	79.4663
1	1149.5	60.9595	4.66212	0.112208	0.523157	0.286729	73.5232
1	1310	32.0562	4.59315	0.127875	0.584792	0.291668	82.0078
1	1245	31.8353	4.21239	0.12153	0.51156	0.293357	80.7574
1	963	38.0297	5.27443	0.0940027	0.495071	0.220541	82.2536
1	1181	29.9999	4.53212	0.115283	0.523174	0.29263	78.813
1	1294.5	40.7626	4.11666	0.126362	0.518763	0.291864	75.4356
1	1310.5	36.9557	3.88427	0.127924	0.489096	0.301384	73.9095
1	1009	41.7185	4.52402	0.0984929	0.450007	0.279449	57.2682
1	1149	34.2532	4.68955	0.112159	0.527428	0.283126	86.4375
1	1009.5	23.3138	4.65345	0.0985417	0.458224	0.286769	66.8468
1	1061.5	30.8424	4.69853	0.103618	0.486713	0.284	85.57
1	826	35.0967	5.55423	0.0806295	0.447799	0.230288	76.6115
1	1147	60.017	3.82474	0.111964	0.423355	0.326392	36.705
1	1147	36.3628	4.41669	0.111964	0.491511	0.303524	80.7379
1	1269	69.2591	4.52213	0.123873	0.550576	0.2872	72.6436
1	1047	54.0362	4.79413	0.102202	0.48931	0.256232	82.2572
1	1233	50.8659	4.39145	0.120359	0.530612	0.308343	79.7605
1	1062	15.5461	3.99232	0.103666	0.41408	0.305363	41.1425
1	1399	31.1575	4.02038	0.136563	0.544361	0.322698	83.5864
1	1239	63.8435	4.28909	0.120944	0.513796	0.283953	64.4394
1	1234.5	34.7649	4.28543	0.120505	0.513914	0.296445	70.0622
1	1276	57.0917	4.21513	0.124556	0.522655	0.308798	57.4972
1	1332	36.0486	4.41533	0.130022	0.551831	0.283559	84.757
1	1155.5	20.0526	3.88143	0.112793	0.437795	0.312883	77.2679
1	1119.5	35.5867	4.40463	0.109279	0.483478	0.289971	64.0235
1	1163	22.1457	4.26534	0.113526	0.478701	0.312995	69.1675
1	1139.5	47.0166	4.4172	0.111232	0.492298	0.30049	78.5315
1	1020.5	53.7909	4.43438	0.0996155	0.43064	0.280714	70.7044
1	1220.5	29.6724	4.08722	0.119138	0.482662	0.317142	58.9775
1	1209.5	20.9837	4.96263	0.118065	0.541143	0.284983	67.7625
1	1310.5	35.7256	4.09422	0.127924	0.523217	0.296154	74.6198
1	1182.5	29.6828	4.55504	0.115429	0.525808	0.27405	72.5338
1	989	23.2863	4.89795	0.0965406	0.472851	0.282983	70.8113
1	1134.5	21.0732	4.60143	0.110744	0.510386	0.272465	77.2756
1	1194.5	51.0834	4.24014	0.1166	0.493425	0.32706	64.1773
1	1004	13.2467	4.88696	0.0980049	0.46461	0.274406	84.2488
1	1027	61.7921	4.59654	0.10025	0.462187	0.276377	69.3386
1	964	32.7143	4.67582	0.0941003	0.437199	0.288697	72.1944
1	1250	25.1889	3.98889	0.122018	0.484942	0.322788	83.6768
1	1171	29.4194	4.10026	0.114306	0.466717	0.315409	83.033
1	1223	50.094	4.25256	0.119382	0.507142	0.311336	65.7612
1	1202.5	20.176	4.29931	0.117381	0.506184	0.28956	81.1399
1	1009	22.9794	4.61372	0.0984929	0.45491	0.276735	62.6333
1	984	45.4511	4.72986	0.0960526	0.461017	0.275393	61.7884
1	1366.5	48.0732	4.09197	0.13339	0.545022	0.329914	84.5383
1	1218	41.1485	4.15679	0.118894	0.49286	0.272703	77.458
1	1481	59.1883	4.22795	0.144567	0.61205	0.298386	86.3011
1	1230.5	47.9603	3.93955	0.120115	0.468625	0.296277	61.3881
1	1290	35.8388	4.08932	0.125923	0.514359	0.295618	81.3584
1	1360	34.0952	4.0492	0.132756	0.538629	0.33371	69.1453
1	1340.5	31.3187	4.04079	0.130852	0.529245	0.293574	69.7262
1	922.5	30.1531	4.73768	0.0900493	0.42316	0.286288	77.2593
1	1186	32.1947	3.68572	0.115771	0.426821	0.347633	65.6176
1	1121.5	30.3115	4.76319	0.109475	0.518706	0.293119	77.1218
1	1047.5	26.8426	4.57891	0.102251	0.467425	0.310306	72.8098
1	885.5	19.4084	5.25303	0.0864375	0.458099	0.257694	74.6992
1	1488.5	21.3794	3.67294	0.145299	0.531721	0.375141	43.8082
1	1211	47.7873	4.59869	0.118211	0.54358	0.282007	80.3595
1	942	43.0246	4.63379	0.0919528	0.42357	0.271751	47.0811
1	1348	67.0151	4.30187	0.131584	0.565136	0.297906	87.1287
1	1284	24.7916	4.19658	0.125337	0.527909	0.317127	86.7298
1	831	35.0613	5.69076	0.0811176	0.458385	0.257287	63.3372
1	1076.5	20.6465	4.54303	0.105082	0.479239	0.293439	77.573
1	994.5	33.2257	4.9722	0.0970775	0.473123	0.293713	73.3423
1	936.5	32.7854	4.36177	0.0914159	0.396224	0.30291	71.3922
1	1153.5	32.9573	4.47362	0.112598	0.504519	0.316273	62.4009
1	955.5	44.6998	4.57925	0.0932706	0.426555	0.30234	69.3207
1	1309.5	55.3886	4.48081	0.127826	0.572619	0.288945	82.4726
1	849	20.4407	5.11642	0.0828746	0.422942	0.24813	68.2527
1	1144	42.4819	5.05966	0.111671	0.564466	0.275114	84.4863
1	1122	23.7065	4.49253	0.109523	0.492148	0.285014	78.8036
1	1041.5	16.652	4.94812	0.101665	0.514154	0.269544	72.6771
1	1432.5	41.1251	4.07176	0.139833	0.562062	0.303608	79.6439
1	1168	39.2064	4.75917	0.114014	0.524435	0.270078	88.5601
1	890	16.6846	5.25233	0.0868768	0.456229	0.250344	76.4333
1	1282.5	31.6494	3.97404	0.12519	0.497677	0.297222	82.396
1	1103.5	23.7247	4.80503	0.107717	0.517579	0.278044	78.8912

## Sheet: phyb_hAT_A
Predicate	Pixel count	SSE	LS Ratio	Surface	Length	Width	Axes angle
1	1429.5	29.4166	3.8084	0.13954	0.530753	0.313727	83.9886
1	1648.5	61.7249	3.99636	0.160917	0.620055	0.286302	76.1515
1	1404	35.3253	3.90114	0.137051	0.530696	0.290996	79.9016
1	160	14.4205	13.2486	0.0156183	0.206859	0.118223	64.2835
1	761	53.0085	5.33548	0.0742846	0.402379	0.238582	46.3287
1	1328	20.2684	4.08178	0.129632	0.523097	0.299654	88.7246
1	1647	18.8897	3.69524	0.160771	0.593008	0.312756	79.128
1	1217.5	21.869	4.18141	0.118846	0.496701	0.282372	82.1448
1	866.5	32.4854	5.08866	0.0845829	0.429177	0.229262	63.1307
1	1396.5	14.9292	3.97324	0.136319	0.528266	0.296795	84.1765
1	1160.5	28.7486	4.31907	0.113282	0.480037	0.27682	69.6071
1	1547	28.4844	3.79654	0.151009	0.572754	0.292466	82.0204
1	1679	20.6924	3.63249	0.163895	0.586251	0.330154	75.072
1	1503	21.7217	3.74809	0.146714	0.54982	0.30628	81.3077
1	1601	10.1521	3.76651	0.156281	0.584208	0.297781	86.9074
1	1208.5	16.2433	4.20093	0.117967	0.492712	0.268503	84.6213
1	1155.5	16.5595	4.26853	0.112793	0.480203	0.273524	74.3829
1	1147.5	39.2486	4.26342	0.112013	0.469155	0.282525	75.2117
1	696.5	10.9821	4.97473	0.0679884	0.336585	0.250912	80.3033
1	1334	12.6668	3.90522	0.130218	0.505242	0.29146	82.4955
1	1378.5	22.0771	3.56809	0.134561	0.478845	0.316644	82.8696
1	1264.5	21.7976	4.08404	0.123433	0.502982	0.281803	84.9365
1	1056	23.2412	4.47048	0.103081	0.4572	0.262231	75.0365
1	1331	40.3237	3.78499	0.129925	0.491549	0.309675	77.9445
1	1332	15.9815	3.81681	0.130022	0.49591	0.303319	73.6199
1	1408	39.4168	4.1072	0.137441	0.563569	0.281665	77.1099
1	1580	20.9157	3.75056	0.154231	0.575135	0.315807	83.1526
1	1098.5	21.3611	4.60084	0.107229	0.469762	0.277	67.1314
1	1447.5	46.8441	3.65002	0.141297	0.51837	0.317467	67.7336
1	1464.5	45.6121	3.88014	0.142956	0.552306	0.299507	83.2324
1	1395	38.1045	4.03356	0.136172	0.524803	0.290299	67.0395
1	732	47.533	5.73181	0.0714537	0.401201	0.233163	47.2276
1	959	34.0122	4.46415	0.0936122	0.417337	0.28399	59.0471
1	1457.5	40.3515	3.81096	0.142273	0.541775	0.306362	82.4135
1	1647	32.7884	3.6553	0.160771	0.587684	0.319898	87.8667
1	1179.5	10.5915	4.07441	0.115136	0.467565	0.274582	82.6184
1	1505	31.3422	4.00295	0.14691	0.58759	0.300335	80.5397
1	1262	54.7987	4.03093	0.123189	0.494398	0.288108	73.8919
1	1301	56.817	3.86468	0.126996	0.491824	0.312413	76.6712
1	1185	32.7089	4.23301	0.115673	0.490241	0.298753	81.706
1	1298	32.3499	3.99354	0.126703	0.505782	0.308983	72.0569
1	1255	41.6624	3.99976	0.122506	0.489901	0.322405	80.9667
1	1162.5	13.2883	4.30152	0.113477	0.486455	0.282527	84.4696
1	1481	17.3646	3.98426	0.144567	0.575648	0.293227	71.8646
1	1219.5	55.1691	4.11553	0.119041	0.49363	0.315244	77.0045
1	1254	45.8004	4.17886	0.122408	0.511461	0.309853	83.9432
1	1074	19.5893	4.54365	0.104838	0.486366	0.283501	51.9392
1	1436.5	32.2747	3.76216	0.140223	0.523071	0.325318	76.7436
1	1404	13.9677	3.83101	0.137051	0.520636	0.332344	87.8791
1	1258.5	26.9644	3.93516	0.122848	0.481434	0.31431	82.7102
1	1255.5	69.3458	4.21864	0.122555	0.518287	0.308285	58.9813
1	1273.5	56.6967	4.56441	0.124312	0.567431	0.271917	67.2138
1	1650	37.2306	3.30874	0.161064	0.533619	0.360644	69.5807
1	1057.5	43.4797	4.77369	0.103227	0.49461	0.257259	77.4107
1	1334	31.1637	4.04586	0.130218	0.516286	0.316724	82.4381
1	1213.5	40.4894	4.00238	0.118455	0.469416	0.31441	69.0265
1	1430.5	26.5957	3.90904	0.139637	0.546949	0.31882	85.1875
1	1203.5	54.7058	4.47398	0.117479	0.525672	0.305528	60.6646
1	1472	22.0691	4.0877	0.143688	0.578252	0.298593	84.6912
1	1267.5	16.2036	4.18997	0.123726	0.516266	0.294048	78.368
1	1275	63.6621	3.90162	0.124458	0.467051	0.308086	76.9083
1	1593.5	57.1846	3.92648	0.155549	0.610755	0.311257	81.0512
1	819	43.2652	5.37259	0.0799462	0.427975	0.245709	76.4296
1	1649.5	25.3798	3.61822	0.161015	0.581343	0.354567	86.8088
1	1300	37.6841	4.02143	0.126899	0.499791	0.304025	74.1355
1	1008.5	33.8176	4.50483	0.0984441	0.441263	0.287826	74.9681
1	1161.5	31.2475	4.11113	0.113379	0.466177	0.308053	68.6683
1	1215	39.1213	4.19826	0.118601	0.491267	0.293365	66.9757
1	1338.5	34.951	3.89244	0.130657	0.512833	0.341541	80.1992
1	1270	28.173	4.17572	0.12397	0.518393	0.288871	80.6003
1	1302	52.1514	4.06331	0.127094	0.508923	0.318544	77.0493
1	1190.5	28.0063	4.22876	0.11621	0.485007	0.287789	72.1859
1	1280.5	59.2626	4.03335	0.124995	0.50396	0.3222	81.2956
1	1117	49.4772	4.55139	0.109035	0.494844	0.267849	79.9752
1	1041	19.6201	4.41081	0.101617	0.448563	0.296101	75.9135
1	1308	28.9866	3.89861	0.12768	0.491794	0.324014	64.6362
1	1470	63.4447	3.71544	0.143493	0.536894	0.338087	83.8198
1	1981	38.7735	3.87003	0.193374	0.748429	0.329542	78.8111
1	1161	34.5036	4.09837	0.11333	0.464558	0.305528	68.8082
1	1171.5	28.7507	4.4133	0.114355	0.504894	0.273947	78.8277
1	1272	53.136	4.55278	0.124166	0.5649	0.277412	81.6555
1	1161.5	43.8879	4.18321	0.113379	0.474761	0.298669	72.5122
1	1786.5	73.8432	3.43482	0.174388	0.59898	0.357659	80.1374
1	1371	31.2394	3.80377	0.133829	0.493538	0.318956	72.4448
1	1180.5	49.224	4.1922	0.115234	0.482689	0.325046	68.0303
1	1179.5	22.6903	4.21645	0.115136	0.484379	0.280104	71.2634
1	1245	34.1064	4.27938	0.12153	0.519438	0.302069	72.8677
1	1190.5	34.3711	4.38355	0.11621	0.511459	0.299129	84.7498
1	1193	25.0443	4.16686	0.116454	0.483914	0.306439	78.611
1	1362	53.4348	4.10127	0.132951	0.538767	0.265934	73.2376
1	1448.5	22.1693	3.79644	0.141394	0.536852	0.321829	56.5678
1	1240.5	51.5524	4.0029	0.121091	0.484568	0.303872	73.2763
1	910.5	48.8292	5.70491	0.0888779	0.507924	0.215855	82.6436
1	1254.5	21.8222	4.05978	0.122457	0.500157	0.316165	71.8753
1	1627	18.1543	3.64586	0.158819	0.576543	0.339234	75.866
1	1677.5	17.2138	3.55001	0.163748	0.575609	0.352582	81.1937
1	1181	56.8472	4.2783	0.115283	0.493156	0.294405	69.8452
1	1307	35.5127	4.05443	0.127582	0.51726	0.313991	71.0597
1	1154	37.4882	4.17334	0.112647	0.470475	0.297198	74.0325
1	1390	50.4305	3.45153	0.135684	0.468456	0.347261	65.8208
1	1206	14.7198	4.04707	0.117723	0.468552	0.294988	79.2957
1	1182.5	32.3519	4.85453	0.115429	0.559201	0.276614	74.4147
1	1292.5	37.9651	3.78906	0.126167	0.483136	0.321888	63.3362
1	1125.5	12.2082	4.18675	0.109865	0.462187	0.292339	83.3973
1	1148.5	30.0623	4.38658	0.11211	0.490472	0.305525	66.8063
1	1535	30.0521	3.63388	0.149838	0.54455	0.348913	74.5297
1	1084	31.7477	4.43477	0.105814	0.468434	0.271594	71.6026
1	1535	25.55	3.73619	0.149838	0.552468	0.328534	75.3227
1	1412	39.2334	3.92229	0.137832	0.540857	0.326557	62.3024
1	847	51.4922	4.74482	0.0826794	0.392439	0.248965	72.3769
1	1249	16.0079	3.6814	0.12192	0.449262	0.335563	81.6098
1	1321	45.4899	3.97959	0.128949	0.507523	0.309972	67.9126
1	1098	44.334	4.44511	0.107181	0.485433	0.287186	71.7246
1	1415.5	33.3747	3.81382	0.138173	0.526929	0.32814	79.9505
1	1809	42.7684	3.56945	0.176584	0.627948	0.352639	87.4216
1	1291	57.4833	4.54101	0.12602	0.573824	0.304389	85.7394
1	1471.5	20.7158	3.91238	0.14364	0.545754	0.320841	80.8459
1	1439.5	39.5563	3.84191	0.140516	0.527356	0.338914	70.8689
1	1450	82.104	3.5831	0.141541	0.502033	0.337731	70.6795
1	1410.5	20.8455	4.04319	0.137685	0.547658	0.30881	80.361
1	1471.5	27.9562	3.68529	0.14364	0.529159	0.335843	80.2042
1	1202.5	16.4468	3.96331	0.117381	0.464794	0.294664	72.3212
1	1381	25.1061	3.82432	0.134805	0.515118	0.336447	64.6447
1	1344.5	46.8065	3.44147	0.131243	0.451722	0.365225	45.9293
1	1472	12.5277	3.8708	0.143688	0.545594	0.31122	80.2287
1	1638.5	60.7324	3.7264	0.159941	0.595875	0.309357	79.0783
1	1289	62.3387	4.0873	0.125825	0.51345	0.307473	68.9066
1	1200.5	30.9597	4.21289	0.117186	0.494183	0.293504	81.6169
1	1284	55.4324	3.85714	0.125337	0.48139	0.328825	85.629
1	1175	27.7304	4.3364	0.114697	0.495131	0.298422	78.5953
1	1240.5	27.8787	4.03043	0.121091	0.486767	0.2983	62.2961
1	1356.5	19.8718	3.73872	0.132414	0.502799	0.338491	48.6172
1	1282.5	23.4231	3.89823	0.12519	0.491473	0.333223	65.6343
1	973	37.5852	5.0124	0.0949788	0.476401	0.243281	69.9197
1	1202	37.6678	3.96074	0.117333	0.46501	0.318544	75.4939
1	1263.5	65.8621	4.16298	0.123336	0.502391	0.287881	65.7868
1	1184	57.4264	4.30911	0.115575	0.49713	0.307561	61.4163
1	1217	42.3367	4.33809	0.118797	0.508397	0.261178	79.6892
1	1438	56.0518	4.06786	0.14037	0.570739	0.296185	76.6343
1	1326	32.2247	4.07527	0.129437	0.525982	0.296828	77.694
1	1470.5	23.7329	4.02699	0.143542	0.569719	0.291759	85.5477
1	1543.5	54.1071	3.83651	0.150668	0.577276	0.320151	72.786
1	1206.5	67.5518	3.7501	0.117772	0.439443	0.327532	64.8126
1	1068.5	44.6715	4.59016	0.104301	0.480013	0.295901	77.1895
1	1069.5	10.5595	4.32389	0.104399	0.446168	0.27463	80.7301
1	1139.5	18.4952	4.39422	0.111232	0.4894	0.290859	74.4221
1	1195	12.6652	4.44824	0.116649	0.518533	0.293641	55.109
1	959.5	19.6373	4.83837	0.093661	0.450673	0.214321	80.4799
1	1101	15.9236	4.64415	0.107473	0.501976	0.273276	66.5482
1	1010	18.6384	4.65483	0.0985905	0.465405	0.27402	88.9096
1	1666	20.0853	3.71978	0.162626	0.603489	0.314026	83.3896
1	1668	30.7759	3.60439	0.162821	0.581977	0.332313	80.8082
1	962.5	28.0234	4.80772	0.0939539	0.453052	0.253102	74.9001
1	1061	18.2086	4.3239	0.103569	0.45112	0.287625	73.2876
1	1272.5	34.1829	3.6096	0.124214	0.448262	0.314062	61.0779
1	1420.5	20.7321	3.67956	0.138661	0.509946	0.323909	74.0908
1	1396	42.5281	3.57155	0.13627	0.486313	0.345068	68.3411
1	1446	44.1111	3.78478	0.14115	0.534383	0.301112	72.9675
1	659.5	26.2495	6.17968	0.0643767	0.400766	0.208248	66.7051
1	1456	17.7394	3.896	0.142127	0.549029	0.300815	85.7653
1	1610.5	40.2885	3.87664	0.157208	0.606301	0.311183	84.5957
1	1477.5	19.4069	3.65125	0.144225	0.522851	0.314857	72.1582
1	1349.5	18.2456	4.08473	0.131731	0.536286	0.292491	73.7633
1	1177.5	52.813	5.03626	0.114941	0.578118	0.210733	86.2883
1	1431.5	41.9117	4.11302	0.139735	0.573836	0.282273	77.8185
1	1160	33.2843	4.42833	0.113233	0.501988	0.28351	72.7188
1	1649	30.1016	3.80096	0.160966	0.598399	0.320473	88.6202
1	1590.5	13.7837	3.58181	0.155256	0.555471	0.332898	79.0084
1	1081.5	25.0233	4.51626	0.10557	0.479168	0.281346	77.0637
1	1519	16.2014	3.65492	0.148276	0.539167	0.326408	82.0204
1	1184.5	22.5247	4.08343	0.115624	0.47205	0.304917	77.7218
1	1315	36.305	3.93683	0.128363	0.504777	0.28966	79.7456
1	1703	34.1455	3.60247	0.166237	0.598752	0.31193	83.9563
1	1131.5	41.4559	4.11372	0.110451	0.455876	0.314908	77.57
1	1440.5	19.5151	3.90165	0.140614	0.547241	0.307813	76.3129
1	1197.5	8.53741	4.05874	0.116893	0.473011	0.305034	69.2225
1	1330	42.6805	3.99085	0.129827	0.519135	0.308499	85.9975
1	1555	45.996	4.14845	0.15179	0.623481	0.271472	82.2405
1	1250	36.3371	4.03515	0.122018	0.493061	0.309206	63.6957
1	1422.5	39.0275	3.56519	0.138856	0.492806	0.345044	71.7014
1	1242.5	11.9822	4.11665	0.121286	0.496464	0.287052	76.9973
1	745	44.5159	6.60228	0.0727227	0.480793	0.20814	82.2258
1	1728	34.2253	3.50763	0.168678	0.591384	0.336669	77.1468
1	1328.5	15.1634	3.98393	0.129681	0.516223	0.282357	83.2732
1	1603	65.4162	3.67182	0.156476	0.577673	0.338743	82.8295
1	1229.5	23.8012	4.18503	0.120017	0.498586	0.288834	82.2728
1	1411.5	69.7331	3.93109	0.137783	0.535443	0.314994	78.9735
1	1496	47.5744	4.09135	0.146031	0.589545	0.300635	76.0514
1	1640	22.8233	3.73528	0.160088	0.59146	0.32424	86.1359
1	534.5	36.6371	6.3257	0.0521749	0.329069	0.184762	65.3007
1	1469.5	50.4333	3.66774	0.143444	0.51423	0.345134	76.861
1	1376.5	28.681	3.62097	0.134366	0.485863	0.349286	51.5977
1	755.5	15.6485	6.7042	0.0737477	0.498791	0.210348	77.6771
1	815	17.8957	5.03069	0.0795557	0.38834	0.256302	81.0779
1	1273	57.5769	4.35008	0.124263	0.540608	0.260988	79.3381
1	1269.5	20.3036	4.05955	0.123921	0.50361	0.29093	70.3535
1	1655.5	57.864	3.8721	0.161601	0.625554	0.305156	77.9535
1	919	20.7362	4.75534	0.0897076	0.428291	0.26676	72.3649
1	1115	53.9224	4.53383	0.10884	0.494222	0.287088	62.3558
1	1604.5	45.1943	3.83555	0.156622	0.600669	0.272492	77.9099
1	1098	8.46499	4.23245	0.107181	0.450846	0.28923	80.3925
1	1511.5	26.2727	3.44248	0.147544	0.509346	0.366697	84.9689
1	1456.5	12.8368	3.3192	0.142175	0.472428	0.373183	72.2221
1	1357.5	37.3452	3.88515	0.132512	0.510233	0.307941	84.6802
1	1521.5	24.8392	3.69852	0.14852	0.548922	0.311459	77.1672
1	1222.5	26.4063	4.01082	0.119334	0.478629	0.289236	87.9356
1	1434	24.5178	3.89732	0.139979	0.545398	0.294798	82.209
1	1432	56.9533	3.87841	0.139784	0.543368	0.320323	75.201
1	1480.5	13.9759	3.80807	0.144518	0.549945	0.2964	80.0903
1	1128	16.0499	4.63639	0.110109	0.50956	0.27188	68.7448
1	1654	49.4224	3.53947	0.161454	0.57165	0.340295	82.1457
1	1311	31.1292	3.8077	0.127972	0.476382	0.337219	77.257
1	1418	80.1278	3.91202	0.138417	0.539949	0.320379	88.1795
1	1066.5	25.3445	4.41971	0.104106	0.455636	0.267157	79.3714
1	1873.5	48.2064	3.50282	0.182881	0.636195	0.348188	81.5011
1	1539.5	26.5064	3.73159	0.150277	0.559506	0.312013	79.4188
1	1485.5	32.4452	4.10492	0.145006	0.587557	0.305354	88.7582
1	1464	30.3799	3.96393	0.142907	0.562001	0.303409	72.015
1	1332.5	17.9153	3.69321	0.130071	0.469092	0.327603	60.1524
1	1162	14.7663	4.19505	0.113428	0.474815	0.288172	73.0651
1	1498.5	45.0117	3.84983	0.146275	0.562009	0.298168	72.8336
1	1413.5	31.5275	3.60142	0.137978	0.486973	0.340353	77.3799
1	1599	62.4063	3.59726	0.156085	0.561465	0.321745	74.3758
1	1285.5	30.5398	4.27468	0.125483	0.532965	0.299946	86.6628
1	1701	50.2212	3.77401	0.166042	0.621608	0.338762	83.0247
1	1641	20.0174	3.59151	0.160185	0.572994	0.337153	88.1893
1	1800.5	28.1705	3.64463	0.175755	0.640442	0.345094	77.6541
1	1275.5	48.8317	4.52	0.124507	0.561715	0.278186	79.8389
1	1361.5	13.2556	4.20196	0.132902	0.553648	0.283362	71.1334
1	1493	10.7015	3.92786	0.145738	0.572432	0.288641	75.756
1	1685.5	26.749	3.5675	0.164529	0.58666	0.320812	77.3916
1	1204	36.0186	4.01654	0.117528	0.479123	0.305235	67.3118
1	1203.5	24.6285	3.95296	0.117479	0.464276	0.29541	84.3483
1	955	49.6623	5.24879	0.0932218	0.488554	0.243869	68.5298
1	1324	40.0689	3.93481	0.129241	0.507465	0.310085	55.3563
1	1330.5	46.2501	4.08221	0.129876	0.529597	0.327237	79.5952
1	1538	13.381	3.75186	0.150131	0.563405	0.304275	84.6071
1	1103	17.4549	4.77917	0.107669	0.500237	0.284316	68.543
1	1394	28.1547	3.57035	0.136074	0.484271	0.345879	68.4265
1	1340.5	26.396	3.93903	0.130852	0.517881	0.325156	80.438
1	1166.5	63.6906	3.94372	0.113867	0.448365	0.325779	66.6885
1	1414.5	39.5237	4.15643	0.138076	0.572585	0.28004	81.653
1	1569.5	26.7406	4.03028	0.153206	0.610684	0.308468	72.9282
1	1302.5	34.7138	4.07895	0.127143	0.518163	0.287423	70.2368
1	1263	22.7782	4.2003	0.123287	0.520995	0.294458	86.7044
1	1439.5	27.5957	3.78949	0.140516	0.532539	0.302673	75.9501
1	1590	36.7025	3.74401	0.155207	0.580218	0.316394	77.0481
1	1642.5	23.0467	3.70845	0.160332	0.593693	0.306768	80.1349
1	1278	24.1379	3.80861	0.124751	0.476412	0.335896	67.8488
1	1218	65.3284	4.35043	0.118894	0.512765	0.286092	70.9115
1	1201.5	35.6805	4.23088	0.117284	0.496213	0.298688	77.3274
1	1539.5	17.2179	3.64937	0.150277	0.544477	0.317672	80.7164
1	1621.5	14.0207	3.79439	0.158282	0.594333	0.302253	79.5484
1	1354.5	50.0754	3.95754	0.132219	0.524726	0.322521	80.5634
1	1454.5	66.883	4.17965	0.14198	0.594477	0.310369	79.8468
1	1571.5	16.2991	3.86359	0.153401	0.589655	0.311474	64.3018
1	1659.5	36.4452	3.46843	0.161991	0.564047	0.350517	84.6166
1	1459	32.6478	3.86916	0.142419	0.542745	0.3214	78.7006
1	1551.5	48.3762	3.81877	0.151449	0.575072	0.322139	83.0996
1	1522	38.8522	3.80291	0.148569	0.557625	0.324543	75.5593
1	1381	44.6565	3.72746	0.134805	0.50428	0.33573	76.2843
1	1070	18.4486	4.36484	0.104447	0.457316	0.283491	71.2852
1	1255.5	22.7011	4.06874	0.122555	0.494112	0.309364	57.4838
1	1580.5	44.0678	3.7089	0.15428	0.566916	0.333911	82.2463
1	1371.5	26.1034	4.09786	0.133878	0.548596	0.311377	71.901
1	1192	45.1412	4.32032	0.116356	0.501716	0.303093	72.7543
1	1681	14.4532	3.50414	0.16409	0.569168	0.345626	77.6442
1	708	58.6516	7.11047	0.069111	0.403838	0.203431	60.2008
1	1298.5	68.0113	3.7108	0.126752	0.470199	0.341051	63.7848
1	1057	51.5226	5.0436	0.103178	0.521702	0.242471	81.0356
1	1124	26.8442	4.48236	0.109719	0.487783	0.268806	80.7066
1	1625.5	27.3025	3.58983	0.158672	0.568293	0.338762	80.7825
1	1448	16.8129	4.12781	0.141346	0.582729	0.289112	82.4032
1	1234	31.001	4.05568	0.120456	0.49053	0.32385	75.313
1	1355	34.6502	3.76845	0.132268	0.494037	0.323369	79.3006
1	1238.5	37.5353	4.0521	0.120895	0.492563	0.325066	62.6461
1	1465	86.5302	4.31852	0.143005	0.604415	0.283392	79.5931
1	1108	50.9546	4.76961	0.108157	0.515322	0.244606	84.1814
1	1476	12.5971	3.81495	0.144079	0.549203	0.317666	70.4355
1	1125.5	12.3997	4.20203	0.109865	0.458919	0.293366	84.5738
1	1691.5	45.4338	3.48741	0.165115	0.573795	0.346366	76.976
1	1263.5	42.1193	4.24914	0.123336	0.520734	0.294219	74.865
1	1551	35.8845	3.60945	0.1514	0.540192	0.332755	70.4403
1	1317	33.5319	3.9413	0.128558	0.493148	0.30123	76.5634
1	1361.5	15.9241	3.94087	0.132902	0.528469	0.310778	77.9443
1	1564.5	50.2003	3.35881	0.152718	0.506511	0.368502	76.4745
1	1609.5	56.2682	3.892	0.15711	0.611438	0.309522	80.1623
1	1839	41.8612	3.626	0.179513	0.646874	0.333203	80.6387
1	1327	47.2281	3.67336	0.129534	0.473874	0.304511	80.1348
1	1004.5	19.835	4.50958	0.0980537	0.442483	0.264092	83.6747
1	1159.5	27.1808	4.1098	0.113184	0.464111	0.301692	77.636
1	1391.5	18.0729	3.77116	0.13583	0.514085	0.333002	75.2483
1	1585.5	52.3606	3.81746	0.154768	0.581347	0.318017	84.2175
1	976	10.6181	4.56548	0.0952717	0.434036	0.261843	79.5417
1	1768	25.2487	3.73504	0.172582	0.642388	0.325713	81.7785
1	1151.5	19.7854	4.419	0.112403	0.495588	0.277038	72.1319
1	1316	33.7339	3.87786	0.128461	0.497819	0.291959	77.3449
1	1259.5	42.4965	3.65208	0.122945	0.449075	0.329447	84.156
1	1812.5	12.6157	3.67964	0.176926	0.64699	0.331404	88.0958
1	1531	15.2818	3.52083	0.149448	0.525367	0.334365	87.5884
1	1463.5	64.6851	3.69673	0.142859	0.511106	0.326581	70.8546
1	1212.5	40.9784	4.32268	0.118357	0.512009	0.295159	73.9537
1	1062.5	12.2401	4.23305	0.103715	0.441356	0.286836	78.6764
1	1442.5	24.3571	3.83665	0.140809	0.539186	0.305306	78.5574
1	1722	31.1118	3.44887	0.168092	0.571711	0.375384	70.469
1	1600	33.0937	3.54429	0.156183	0.553157	0.323695	81.2898
1	1167	22.2217	4.03565	0.113916	0.457373	0.315987	75.9679
1	1163.5	43.67	4.51072	0.113574	0.514539	0.278853	70.8795
1	1227.5	28.9613	4.38813	0.119822	0.521981	0.304214	76.5437
1	1080	10.937	4.31036	0.105424	0.455085	0.283126	70.5121
1	1410	42.0949	3.86319	0.137636	0.531238	0.317544	79.7687
1	1476.5	17.1662	3.77487	0.144128	0.543666	0.302774	85.9101
1	1416	18.1959	3.90829	0.138222	0.52804	0.321839	80.9417
1	974.5	24.7835	4.97418	0.0951252	0.468434	0.25641	84.8679
1	1081	32.1706	4.73209	0.105521	0.503024	0.271032	73.2162
1	1543.5	32.9082	3.83953	0.150668	0.577128	0.307428	82.9321
1	1307.5	26.1155	3.97254	0.127631	0.49929	0.317368	81.3059
1	1198.5	56.6068	3.99405	0.116991	0.461101	0.301471	77.1681
1	1215	84.5256	4.70301	0.118601	0.556841	0.267427	71.5725
1	1223	34.1201	4.15352	0.119382	0.497635	0.312199	79.7393
1	1359	19.2262	3.80633	0.132658	0.504077	0.319834	84.1189
1	1437.5	19.1028	3.78828	0.140321	0.534155	0.321972	73.5543
1	1647	47.6943	3.58279	0.160771	0.560213	0.36865	76.7552
1	1448.5	15.4417	3.79284	0.141394	0.530396	0.326113	66.7121
1	916	52.3041	5.64004	0.0894148	0.503601	0.220698	66.4126
1	906	22.422	5.13821	0.0884386	0.454005	0.252835	66.5803
1	1948	32.2218	3.47351	0.190153	0.659033	0.33719	82.6691
1	1330	24.1836	4.13624	0.129827	0.533036	0.307096	81.9191
1	1655.5	39.9914	3.2022	0.161601	0.514743	0.39441	82.9787
1	1543.5	61.5166	3.97556	0.150668	0.607477	0.363699	57.8728
1	1208	21.3552	4.22161	0.117918	0.497339	0.299395	71.4542
1	1356.5	16.9776	3.84347	0.132414	0.510418	0.318102	80.4202
1	1280.5	15.0265	3.85828	0.124995	0.480004	0.326527	76.6322
1	1376	36.6373	3.92587	0.134317	0.527261	0.320146	57.0852
1	1442	30.4389	3.69661	0.14076	0.520106	0.307609	82.2781
1	1338.5	41.2203	3.9192	0.130657	0.513348	0.310261	79.4975
1	1468	27.674	3.3851	0.143298	0.483015	0.370307	62.5212
1	1021	38.9499	4.63488	0.0996643	0.462633	0.282694	81.003
1	1552	58.9666	3.65209	0.151498	0.543125	0.344125	76.6853
1	1228.5	13.5186	4.05535	0.119919	0.481394	0.308552	65.0716
1	1654.5	18.3228	3.44767	0.161503	0.552686	0.334318	76.3887
1	1407	43.5203	3.76994	0.137343	0.514408	0.303454	81.3785
1	1308.5	54.2481	4.01434	0.127728	0.509661	0.310454	81.4335
1	1046	57.4606	4.47379	0.102105	0.461704	0.281554	84.6948
1	1100.5	16.2413	4.19809	0.107425	0.441563	0.293103	71.4113
1	1120	34.5413	4.41804	0.109328	0.483271	0.301506	49.9889
1	1136	32.7266	4.15457	0.11089	0.45852	0.314668	67.5711
1	1601.5	53.6762	3.70971	0.156329	0.577735	0.320662	68.3191
1	946.5	58.82	5.33606	0.092392	0.486568	0.217589	76.0205
1	1102	47.2729	4.69537	0.107571	0.506912	0.275402	78.7751
1	1148	46.2701	4.18758	0.112061	0.46302	0.303008	84.1164
1	1142.5	13.9636	4.42272	0.111524	0.490168	0.275558	79.7654
1	1016	40.7026	4.31047	0.0991762	0.4232	0.287802	72.9452
1	1076.5	13.3766	4.49223	0.105082	0.472212	0.272093	72.7611
1	1279.5	20.6925	3.80343	0.124898	0.475695	0.330935	76.177
1	1681.5	54.4863	3.7255	0.164139	0.610734	0.329436	75.0799
1	1329	36.127	3.69873	0.12973	0.480605	0.334858	74.6747
1	1189.5	13.6681	3.83101	0.116112	0.443163	0.297192	82.6173
1	1141	33.6829	4.39119	0.111378	0.488547	0.304493	73.3278
1	1179.5	34.6571	4.31138	0.115136	0.496279	0.310832	66.4974
1	1326.5	34.7764	3.78792	0.129486	0.488855	0.335909	64.8338
1	1422	14.4744	3.82177	0.138808	0.52491	0.328277	81.3705
1	1222	24.9812	3.64936	0.119285	0.435907	0.340601	69.8053
1	1379	18.74	3.48408	0.13461	0.46528	0.355969	59.5273
1	1159	28.755	4.60642	0.113135	0.520602	0.279225	66.8089
1	822.5	50.2878	4.74462	0.0802878	0.383534	0.278238	44.3276
1	1739.5	24.4161	3.81645	0.1698	0.640381	0.324991	82.8484
1	1235.5	25.7758	4.04611	0.120603	0.484192	0.305532	83.5193
1	1150	52.6865	4.44139	0.112257	0.498659	0.285756	80.0858
1	1114.5	42.9808	4.46207	0.108791	0.489309	0.269986	80.1983
1	1200	23.4614	4.39414	0.117137	0.516631	0.302878	62.7014
1	1347	9.63653	3.96419	0.131487	0.517725	0.29058	78.89
1	1379.5	28.9324	4.09496	0.134659	0.545784	0.291611	83.9526
1	1460.5	22.1697	3.68442	0.142566	0.525662	0.340701	86.2341
1	968.5	15.9012	4.46087	0.0945395	0.419105	0.29859	42.6685
1	1759	14.9922	3.56137	0.171704	0.611214	0.332163	82.1323
1	1333.5	28.4004	3.98584	0.130169	0.519291	0.31363	72.1241
1	957	26.759	4.68372	0.093417	0.443097	0.26741	72.4145
1	1618.5	15.2247	3.34837	0.157989	0.52901	0.391166	80.4982
1	1127.5	51.7342	4.31298	0.11006	0.471204	0.288808	77.5342
1	1080	20.9975	3.94297	0.105424	0.415422	0.31783	62.0305
1	1405	43.0087	3.68963	0.137148	0.506365	0.339745	75.3346
1	1274	32.1064	4.21272	0.124361	0.527594	0.302655	82.2788
1	1273	24.2067	3.77401	0.124263	0.46871	0.320527	86.3773
1	1277	27.3897	4.08768	0.124654	0.51007	0.303258	81.6115
1	1374.5	28.4262	3.95206	0.134171	0.528679	0.278151	85.2688
1	1168	53.5419	4.61978	0.114014	0.516954	0.24734	75.2179
1	1312	32.3515	3.95703	0.12807	0.501867	0.305532	61.598
1	985.5	19.5919	4.28021	0.096199	0.412692	0.290573	73.2203
1	1390	49.7495	4.03076	0.135684	0.527104	0.325467	69.9938
1	1525.5	33.9121	3.81801	0.148911	0.563398	0.303278	84.9697
1	1253	47.7186	3.95932	0.122311	0.482546	0.303037	66.4609
1	1458	39.5804	3.76166	0.142322	0.534857	0.312769	82.3649
1	1565	22.5099	3.51827	0.152767	0.53588	0.33201	83.8003
1	1047	47.7409	4.60403	0.102202	0.469036	0.264737	71.8231
1	1309	35.5478	4.05738	0.127777	0.521863	0.327511	70.2717
1	1509	31.558	3.69015	0.1473	0.539275	0.320712	87.788
1	1383.5	48.4272	4.01727	0.13505	0.541342	0.310338	83.4345
1	1581	39.176	3.16048	0.154328	0.487504	0.389876	63.5895
1	1424	35.1962	3.85712	0.139003	0.536321	0.341108	61.4983
1	1610.5	32.9335	3.55998	0.157208	0.5532	0.359516	81.9149
1	1377.5	44.6406	4.15419	0.134464	0.551825	0.282126	85.116
1	1580.5	36.1776	3.51417	0.15428	0.53881	0.334025	88.4131
1	1549	57.9618	3.63235	0.151205	0.549114	0.307162	78.6298
1	1374.5	45.7442	4.07428	0.134171	0.546223	0.27777	79.2491
1	1763.5	29.9021	3.36846	0.172143	0.581852	0.375596	77.9035
1	1241.5	62.177	4.06612	0.121188	0.496278	0.298641	57.4334
1	1658.5	13.3277	3.46646	0.161893	0.561143	0.345447	80.8544
1	1026	24.51	5.14528	0.100152	0.51198	0.269546	42.673
1	1511.5	28.5936	3.63695	0.147544	0.530027	0.331745	79.6931
1	1370	33.2481	4.06759	0.133732	0.544753	0.304511	75.0947
1	1365	12.5359	3.80487	0.133244	0.507898	0.341494	74.7486
1	1180.5	54.5224	4.3401	0.115234	0.497412	0.293002	83.1215
1	1572	19.1174	3.73001	0.15345	0.570018	0.309446	81.0012
1	1032	22.0458	4.8396	0.100738	0.488632	0.253169	68.3956
1	1352.5	36.7887	3.57803	0.132023	0.471941	0.344557	80.7252
1	1062.5	24.5855	4.62247	0.103715	0.482917	0.281776	81.5201
1	1404	43.8968	4.05353	0.137051	0.549676	0.305431	83.8912
1	1077	33.9334	4.3583	0.105131	0.455463	0.275036	64.7093
1	1569	65.7512	3.79596	0.153157	0.578438	0.32118	83.5986
1	1556	29.4819	3.53488	0.151888	0.53572	0.330069	89.2095
1	928	53.8073	4.91105	0.0905862	0.443314	0.249893	79.8981
1	1114.5	29.4254	4.41416	0.108791	0.472007	0.284573	83.2001
1	1107	87.8039	4.38309	0.108059	0.476684	0.292972	67.9386
1	1678	20.8718	3.44195	0.163797	0.562862	0.336522	68.7422
1	1017.5	18.6605	4.64729	0.0993227	0.461487	0.259043	82.063
1	1075.5	18.1088	4.22583	0.104984	0.442698	0.296501	84.8872
1	1216.5	42.4989	3.93229	0.118748	0.467698	0.324177	33.0949
1	1492.5	79.2541	3.50739	0.145689	0.510354	0.368024	66.2642
1	1350	59.8422	3.85539	0.131779	0.504733	0.320684	74.94
1	1175	55.7528	4.34843	0.114697	0.500021	0.29192	77.8867
1	983.5	25.3497	4.713	0.0960038	0.452673	0.262965	85.0525
1	1173.5	35.1168	4.26176	0.11455	0.48915	0.315987	65.5588
1	1537.5	29.7454	3.86783	0.150082	0.570033	0.325059	84.849
1	1239.5	43.645	4.12646	0.120993	0.499381	0.31035	84.7105
1	1440.5	37.1209	3.84693	0.140614	0.528116	0.339096	61.2224
1	1152	54.1684	4.77536	0.112452	0.540624	0.242318	81.0954
1	1410.5	47.6401	3.80236	0.137685	0.521131	0.329655	83.1287
1	1406	47.0993	3.87313	0.137246	0.531294	0.316546	82.2007
1	1505.5	53.7612	3.51455	0.146958	0.517852	0.355776	81.645
1	1598.5	14.448	3.85285	0.156037	0.593226	0.320486	81.4172
1	1817	29.1527	3.557	0.177365	0.628935	0.33336	86.6905
1	1299	25.7856	3.82768	0.126801	0.486405	0.327846	77.5168
1	1403	38.8017	3.79885	0.136953	0.514405	0.343522	82.4514
1	1304.5	27.6992	4.17626	0.127338	0.531588	0.305948	83.4832
1	1340.5	31.6285	3.87782	0.130852	0.491551	0.331049	72.386
1	1306	50.9964	4.0187	0.127484	0.517298	0.325371	74.1873
1	1106.5	52.0387	4.2575	0.10801	0.459027	0.308131	74.6337
1	943	15.372	5.0847	0.0920504	0.472282	0.260417	63.6263
1	1413.5	25.7342	3.54987	0.137978	0.491475	0.360377	75.6243
1	1437	33.3585	3.54756	0.140272	0.498893	0.344951	81.042
1	1520	20.3089	3.71568	0.148374	0.549652	0.321664	85.4505
1	1667	16.7212	3.64106	0.162723	0.58742	0.3211	81.5813
1	1264	49.1502	4.04092	0.123385	0.478034	0.292653	66.6173
1	1241	13.084	4.31251	0.121139	0.521959	0.278094	89.1273
1	1141	35.6831	4.19749	0.111378	0.470709	0.300792	69.6271
1	1280	15.2623	4.19553	0.124946	0.513788	0.297649	86.4851
1	1370	33.8203	3.93594	0.133732	0.523906	0.327113	59.9315
1	1096.5	59.853	4.2029	0.107034	0.449417	0.301274	76.2118
1	1423.5	37.1955	3.65798	0.138954	0.509696	0.346696	85.7355
1	1744	53.0551	4.22122	0.17024	0.720223	0.310434	74.7131
1	1380.5	34.3055	3.68608	0.134757	0.49272	0.327546	58.1563
1	1262	49.85	4.05144	0.123189	0.501969	0.320418	84.5855
1	883	45.1227	4.95617	0.0861935	0.429724	0.247789	76.2127
1	1367.5	57.2087	4.37432	0.133488	0.569426	0.329832	56.5903
1	1547	62.8217	3.51958	0.151009	0.536639	0.354207	64.0035
1	1424	54.6143	3.7935	0.139003	0.519651	0.348801	63.1092
1	1428.5	23.3713	3.99731	0.139442	0.549625	0.31671	86.3902
1	1129	39.6326	4.60354	0.110207	0.508624	0.260196	69.2213
1	1108.5	12.8352	4.24687	0.108206	0.457244	0.282263	59.9947
1	991.5	21.3305	4.57782	0.0967847	0.435171	0.267951	79.8434
1	1465	19.3074	3.86915	0.143005	0.55033	0.296097	76.8995
1	961	37.7071	4.48413	0.0938074	0.417463	0.281401	74.6931
1	1185.5	29.3295	3.90479	0.115722	0.456242	0.323778	43.1071
1	865.5	31.049	5.2094	0.0844853	0.438631	0.246103	57.0485
1	1696	42.3507	3.79011	0.165554	0.618413	0.327105	81.0664
1	1452	32.4196	3.73744	0.141736	0.529658	0.298669	77.1851
1	1200.5	39.7527	4.31338	0.117186	0.504532	0.294993	87.2811
1	1424.5	25.5227	3.87225	0.139052	0.53431	0.325143	84.7576
1	1308.5	35.6255	3.89925	0.127728	0.504655	0.320707	72.3324
1	1303	44.8217	4.12582	0.127192	0.523077	0.300256	69.5602
1	1529.5	50.6648	3.76586	0.149301	0.544563	0.323464	83.8258
1	1274	56.9449	4.50397	0.124361	0.555022	0.282751	72.4908
1	949	23.8684	4.95693	0.0926361	0.463368	0.26437	67.1914
1	1584.5	43.7112	3.47053	0.15467	0.533734	0.36335	81.537
1	1202	31.8074	3.71992	0.117333	0.434465	0.304018	66.8835
1	1150	38.9102	4.07819	0.112257	0.45436	0.313252	76.2226
1	1344	67.1015	3.96746	0.131194	0.516832	0.323358	62.7816
1	1370.5	48.2139	3.81679	0.133781	0.513588	0.313435	68.4036
1	1780	64.6547	3.68134	0.173754	0.63856	0.324015	87.4106
1	1687	26.1177	3.65067	0.164675	0.600383	0.328437	84.6484
1	1219.5	19.159	4.07196	0.119041	0.485796	0.308184	65.3371
1	1189	11.0543	4.31729	0.116064	0.497027	0.29881	71.6313
1	1127	28.6302	4.42465	0.110011	0.486628	0.283907	73.726
1	1241	31.3376	4.25399	0.121139	0.516661	0.30628	61.6913
1	893.5	63.4708	5.64675	0.0872185	0.49609	0.204873	72.9917
1	1092	48.7291	4.35272	0.106595	0.466722	0.283867	86.0555
1	1342	34.3961	4.15816	0.130999	0.544332	0.307622	77.8411
1	1213.5	20.5679	3.95455	0.118455	0.474076	0.300034	63.0425
1	1443.5	23.783	3.75804	0.140906	0.533892	0.326513	81.3195
1	1190	20.944	4.39889	0.116161	0.512078	0.290071	63.1465
1	1313.5	47.5756	3.86435	0.128217	0.494014	0.325141	83.3338
1	1319.5	13.0864	4.04471	0.128802	0.515942	0.31466	62.1179
1	1318.5	81.0785	4.13989	0.128705	0.519822	0.306328	79.1668
1	1461.5	34.4001	3.78707	0.142663	0.526042	0.330047	60.7602
1	1726.5	48.966	3.42447	0.168531	0.565505	0.33448	78.4687
1	1450	30.0229	4.04318	0.141541	0.573203	0.310296	75.9224
1	1810.5	16.2162	3.4963	0.176731	0.611841	0.34713	77.0566
1	1325.5	51.3076	4.06955	0.129388	0.525721	0.296526	77.1171
1	1496.5	27.5373	3.60461	0.14608	0.530697	0.340122	76.4384
1	1179.5	18.0058	4.11701	0.115136	0.473821	0.287235	84.6927
1	1262	43.5729	3.95345	0.123189	0.491917	0.307816	70.9632
1	861	29.7543	4.89567	0.084046	0.408724	0.268271	74.1171
1	1399	37.2923	3.87597	0.136563	0.528288	0.311397	64.0067
1	1575	16.9117	3.80678	0.153743	0.585367	0.321698	82.032
1	1209.5	55.3847	4.15526	0.118065	0.497035	0.315568	63.5247
1	1365	30.0019	3.84415	0.133244	0.51173	0.317227	54.2715
1	768.5	28.7458	4.83817	0.0750167	0.362927	0.272559	59.3431
1	1344.5	28.5838	3.9941	0.131243	0.522241	0.30489	82.9285
1	1599.5	66.0542	3.8175	0.156134	0.59216	0.298902	67.4765
1	1472	49.9094	3.70138	0.143688	0.52714	0.335842	59.0958
1	1113.5	33.7206	4.53391	0.108694	0.494897	0.289734	53.755
1	1648.5	16.1261	3.9298	0.160917	0.631308	0.300598	82.7365
1	1117	25.4305	5.03309	0.109035	0.543963	0.24555	80.9328
1	1302	46.9588	3.85868	0.127094	0.476329	0.32794	78.4226
1	1254	47.7868	4.23348	0.122408	0.490097	0.290536	62.5506
1	1506	56.7442	3.5845	0.147007	0.526474	0.315751	72.5419
1	1547	14.1808	3.59125	0.151009	0.534432	0.336249	77.8448
1	1321.5	41.1186	4.04742	0.128997	0.501391	0.324501	64.244
1	1414.5	21.9694	3.73509	0.138076	0.511726	0.325458	67.547
1	1187	40.9473	4.26143	0.115868	0.494243	0.312198	65.7613
1	1461	35.93	3.3654	0.142615	0.480403	0.380553	49.7078
1	994.5	64.7409	4.76914	0.0970775	0.463231	0.282967	79.0164
1	1448	42.2883	3.9568	0.141346	0.550834	0.298862	82.2187
1	1561	32.0803	3.5266	0.152376	0.535952	0.356033	69.6232
1	1378	47.845	3.93562	0.134513	0.531159	0.321252	84.8476
1	1017.5	18.6573	4.2719	0.0993227	0.423042	0.289423	62.0995
1	1512	27.1175	3.62948	0.147593	0.535474	0.331357	70.5658
1	1466.5	48.8058	3.64906	0.143152	0.515013	0.339029	84.0949
1	1208.5	42.3147	4.14516	0.117967	0.490659	0.307755	69.4783
1	1521.5	27.9348	3.95561	0.14852	0.583971	0.307363	82.7261
1	1368.5	23.6601	3.9263	0.133585	0.510858	0.327569	77.18
1	1191.5	83.0138	4.08631	0.116308	0.475353	0.310338	67.4508
1	1385	57.8816	3.94896	0.135196	0.525077	0.3176	69.4385
1	1259.5	29.0952	3.99471	0.122945	0.494815	0.30628	81.7063
1	1334	35.5587	3.84321	0.130218	0.505736	0.334189	86.2329
1	1114.5	17.7715	4.17342	0.108791	0.448002	0.288079	81.495
1	1223	33.9219	4.05442	0.119382	0.491827	0.308975	74.5942
1	1628.5	42.2405	3.62403	0.158965	0.575421	0.339898	68.6146
1	1251	27.4035	3.8698	0.122116	0.471155	0.310841	69.2083
1	993	34.8565	4.93134	0.0969311	0.485459	0.260839	78.4854
1	1186.5	45.5498	4.22634	0.115819	0.488694	0.303569	54.306
1	1119	18.2092	4.39292	0.109231	0.476609	0.305644	50.4341
1	1267	22.8334	4.10312	0.123677	0.507992	0.314934	73.1498
1	1249	31.0268	4.63451	0.12192	0.566972	0.309661	70.4221
1	1252	40.1977	3.94007	0.122213	0.480162	0.306917	72.526
1	1545.5	53.2227	3.66374	0.150863	0.549559	0.329995	78.0486
1	1907	25.4738	3.64805	0.186151	0.675245	0.323141	87.4028
1	1292.5	48.9303	4.24963	0.126167	0.530564	0.306671	81.1711
1	1732	53.6811	3.53792	0.169068	0.592085	0.338954	67.3876
1	1285	40.7502	4.05009	0.125435	0.50139	0.313993	74.1954
1	1416	24.8336	3.91946	0.138222	0.539895	0.295706	74.5799
1	1762	25.0677	3.46378	0.171997	0.595509	0.332173	88.2659
1	1300	64.326	3.93927	0.126899	0.500257	0.317656	55.0351
1	1782.5	63.9519	3.64301	0.173998	0.63025	0.346599	76.4158
1	1039	34.8428	4.23998	0.101421	0.420224	0.30222	65.2523
1	1573.5	30.1394	3.88343	0.153596	0.592308	0.294836	63.1631
1	1288	34.6871	3.99056	0.125727	0.500669	0.322408	76.1058
1	1389.5	62.6486	3.70982	0.135635	0.497501	0.327592	52.6276
1	1571	19.781	3.73815	0.153352	0.570279	0.320946	82.1508
1	1366	63.275	4.26655	0.133341	0.565319	0.283939	72.4329
1	1341.5	41.8749	3.75656	0.13095	0.491691	0.332156	72.6546
1	1080.5	11.2368	4.65063	0.105472	0.488458	0.27889	79.8446
1	1664.5	25.2833	3.71241	0.162479	0.599483	0.311549	67.2025
1	1660	23.0378	3.82652	0.16204	0.618424	0.306598	82.2366
1	1581.5	44.2026	3.77697	0.154377	0.571259	0.324097	82.0007
1	1493	45.7854	3.87407	0.145738	0.561579	0.331372	78.1229
1	1471	31.3463	3.64885	0.143591	0.520446	0.357084	74.335
1	1201.5	26.9171	4.44402	0.117284	0.521327	0.283325	73.4754
1	1191	48.4564	4.27312	0.116259	0.494288	0.295892	62.1594
1	1696	58.1457	3.76593	0.165554	0.615244	0.33811	84.8134
1	1504	59.2681	3.64501	0.146812	0.538484	0.33963	83.8685
1	1429	18.5444	3.55927	0.139491	0.491114	0.339323	83.0276
1	1293	32.6048	4.04552	0.126215	0.493334	0.307216	82.404
1	1766.5	68.2261	3.54039	0.172436	0.609666	0.351511	86.0247
1	1180	47.778	4.3105	0.115185	0.500003	0.289599	81.0104
1	1412	39.6128	3.75804	0.137832	0.506296	0.329012	72.0005
1	1329	43.6386	4.11166	0.12973	0.538365	0.324326	77.9208
1	1206.5	25.4894	4.62778	0.117772	0.54354	0.276296	87.8446
1	1228	17.8087	4.42385	0.11987	0.530953	0.288007	76.834
1	1412.5	43.8667	3.93608	0.13788	0.545282	0.295322	69.4224
1	1716	21.465	3.40514	0.167506	0.570672	0.359864	81.5359
1	1369	16.6174	3.91546	0.133634	0.521052	0.309643	82.1074
1	1256.5	18.6354	4.50536	0.122652	0.555945	0.293974	88.6933
1	1089.5	41.798	4.4889	0.106351	0.478923	0.28999	79.1676
1	1481.5	58.3713	3.96291	0.144616	0.572957	0.311891	75.3533
1	1403	74.6801	4.40048	0.136953	0.593305	0.272573	79.7515
1	1315	22.8362	3.95593	0.128363	0.500638	0.314619	71.1215
1	1419.5	30.9686	3.90118	0.138564	0.526478	0.344063	79.4194
1	1446.5	47.9634	3.7692	0.141199	0.531855	0.349311	79.0959
1	1311	42.4196	3.90002	0.127972	0.504418	0.316515	74.7763
1	1230	34.9118	4.25858	0.120066	0.509204	0.27698	77.6292
1	1688	18.5727	3.6741	0.164773	0.600055	0.33232	79.1047
1	1307.5	54.3062	4.12116	0.127631	0.517759	0.271542	66.3111
1	1727	29.8505	3.15965	0.16858	0.533361	0.39392	64.5228
1	1495	48.6708	3.41496	0.145934	0.490007	0.356442	70.6227
1	1297	52.633	4.07753	0.126606	0.51641	0.315833	71.3668
1	1337	52.949	3.90659	0.13051	0.507003	0.308302	63.3129
1	1148	29.8611	4.16428	0.112061	0.467551	0.300646	76.6042
1	1738	17.1067	3.39813	0.169654	0.573964	0.344506	79.0962
1	1461	25.9218	3.59181	0.142615	0.512171	0.322293	74.7773
1	1244	49.9498	4.28157	0.121432	0.520871	0.277903	73.0613
1	1592	63.6355	3.64841	0.155402	0.564488	0.348096	70.912
1	1092	36.1766	4.30203	0.106595	0.459073	0.294905	71.7585
1	1292	20.6269	4.00372	0.126118	0.508748	0.319082	83.3729
1	1384	38.7869	3.83318	0.135098	0.50717	0.327561	61.5302
1	1005.5	72.3751	4.8427	0.0981513	0.481298	0.285921	58.5148
1	1760.5	29.4541	3.67283	0.17185	0.620706	0.352323	78.2412
1	1262	37.0247	4.36848	0.123189	0.537844	0.292226	65.4169
1	1889.5	19.4445	3.29821	0.184442	0.604275	0.35074	80.109
1	1666.5	29.6719	3.48091	0.162674	0.564834	0.331614	71.282
1	1484.5	38.5515	4.0166	0.144909	0.582947	0.285694	73.3387
1	1547.5	53.8731	3.9566	0.151058	0.593232	0.295599	82.431
1	1519.5	39.9019	3.85671	0.148325	0.570949	0.312742	73.1926
1	1364.5	48.5641	3.92044	0.133195	0.521499	0.31716	76.9452
1	1492	18.2068	3.8779	0.145641	0.564606	0.297468	60.4284
1	1086.5	50.433	4.71534	0.106058	0.487898	0.269393	84.2989
1	1135.5	39.3576	4.3954	0.110841	0.487962	0.287099	77.0167
1	1338.5	45.8394	4.1551	0.130657	0.543132	0.286601	76.5498
1	1433.5	81.8443	3.78154	0.13993	0.531139	0.34293	80.5627
1	1214.5	57.0658	4.18328	0.118553	0.49594	0.301917	89.529
1	973	24.86	5.016	0.0949788	0.477019	0.27204	69.0787
1	1245.5	48.7647	4.08627	0.121579	0.502772	0.311797	72.5228
1	1385.5	42.4479	4.45958	0.135245	0.60313	0.266302	74.2281
1	1596.5	35.7985	3.64027	0.155841	0.56684	0.345957	82.097
1	1055.5	51.0321	4.84811	0.103032	0.499976	0.271373	61.8697
1	1388	43.7542	3.91013	0.135489	0.531819	0.305957	83.3155
1	1437.5	37.9189	3.96849	0.140321	0.560402	0.33549	63.7973
1	1414.5	30.226	3.96768	0.138076	0.545687	0.327895	78.1614
1	1456.5	68.4628	3.92676	0.142175	0.553225	0.300561	83.347
1	1185	17.7388	4.28809	0.115673	0.482092	0.274883	77.3911
1	1357	52.6903	3.70673	0.132463	0.492421	0.357113	87.9166
1	1311.5	38.4873	4.45428	0.128021	0.552198	0.295038	80.4859
1	1132	39.2051	4.19836	0.110499	0.463879	0.293572	85.2907
1	1721	13.4983	3.45142	0.167994	0.579538	0.34601	85.0168
1	1274.5	37.7329	4.16933	0.12441	0.519136	0.322294	84.9096
1	1484.5	66.6642	4.12072	0.144909	0.596909	0.30724	57.4677
1	1657.5	21.212	3.63303	0.161796	0.586923	0.358501	85.6269
1	1371.5	29.9709	4.0217	0.133878	0.539954	0.327805	79.585
1	1165	19.8099	4.35692	0.113721	0.491352	0.278723	84.3466
1	1173.5	61.8943	4.2167	0.11455	0.47925	0.289816	79.5206
1	873	53.171	6.31302	0.0852174	0.526981	0.248233	76.1335
1	1619	44.0017	3.69402	0.158038	0.578501	0.31436	68.8305
1	1193.5	30.3955	4.19628	0.116503	0.490228	0.29138	81.7027
1	1315	45.5789	3.99579	0.128363	0.509702	0.323159	63.4825
1	1528.5	20.7511	3.94279	0.149204	0.582862	0.321511	79.3597
1	1328	41.5471	4.0475	0.129632	0.511292	0.286088	77.2742
1	1161.5	33.8683	4.01098	0.113379	0.438037	0.311552	74.4369
1	1320.5	28.2665	4.14674	0.1289	0.534158	0.299579	80.6493
1	1210	59.0737	4.35726	0.118113	0.514157	0.283768	82.5489
1	1102.5	25.2292	4.18976	0.10762	0.453482	0.284285	83.4614
1	1280.5	26.048	3.76949	0.124995	0.469407	0.343191	74.3083
1	874	47.4317	5.96827	0.085315	0.507194	0.21019	82.959
1	1591.5	60.4701	3.76902	0.155353	0.584009	0.323584	85.2234
1	1149.5	56.8592	4.15644	0.112208	0.464102	0.303623	65.4078
1	1365.5	36.4979	4.62398	0.133292	0.614102	0.279248	80.3218
1	1228	25.7789	4.13169	0.11987	0.478094	0.290169	63.3129
1	1266	36.8996	3.89932	0.12358	0.481845	0.317672	68.6304
1	1470.5	14.3831	3.66757	0.143542	0.523315	0.345338	89.2447
1	1431.5	12.4337	3.36876	0.139735	0.470829	0.36769	88.5446
1	1272.5	45.2494	4.42091	0.124214	0.536256	0.284844	72.6532
1	1607	32.8302	4.06552	0.156866	0.637733	0.289328	82.7628
1	1522.5	37.8847	3.85493	0.148618	0.568708	0.328882	81.1555
1	1399.5	21.7029	3.99737	0.136611	0.54349	0.293439	88.0332
1	1334.5	26.4804	3.81548	0.130266	0.496251	0.328031	59.9648
1	1405	28.4954	3.92399	0.137148	0.536508	0.29263	70.6765
1	1349.5	35.8382	3.88792	0.131731	0.504019	0.330973	76.3503
1	1596.5	18.4256	3.69509	0.155841	0.576631	0.32385	86.6902
1	1361	39.7623	4.06511	0.132853	0.537988	0.301751	76.6992
1	1578	45.8429	3.72373	0.154036	0.571903	0.327237	84.5117
1	1412	43.0371	4.25325	0.137832	0.585768	0.293421	73.8181
1	1238.5	17.0986	4.16985	0.120895	0.504775	0.306995	71.6529
1	1272	46.4498	4.17842	0.124166	0.518859	0.299837	77.9628
1	1163.5	64.1579	4.73911	0.113574	0.540649	0.260006	84.6834
1	1066	15.8159	4.74697	0.104057	0.49227	0.283623	59.1818
1	1518	63.0131	3.80319	0.148179	0.559378	0.31426	80.5224
1	1640.5	52.5948	3.9504	0.160136	0.627609	0.318544	86.6266
1	1159	57.0697	4.44997	0.113135	0.501132	0.281794	67.8122
1	1882	16.0178	3.4091	0.18371	0.625858	0.341134	81.9331
1	1401	60.2905	3.93641	0.136758	0.538847	0.321829	74.0371
1	1486	61.0061	4.11841	0.145055	0.595989	0.295574	79.1784
1	1093.5	22.2115	4.62262	0.106741	0.491339	0.284806	81.233
1	1044	22.9574	4.50638	0.101909	0.455325	0.320662	36.659
1	1553.5	46.3712	4.01125	0.151644	0.602139	0.330614	68.1311
1	1137.5	21.2552	4.60819	0.111036	0.511554	0.265256	85.1812
1	1572.5	16.1655	3.85138	0.153499	0.58816	0.325557	84.2008
1	1325	41.4087	3.99127	0.129339	0.514547	0.314429	72.03
1	1440.5	45.7804	4.02664	0.140614	0.564814	0.293829	84.2638
1	881	32.5652	4.76438	0.0859983	0.411345	0.262322	74.1178
1	1320.5	62.245	3.78067	0.1289	0.485813	0.330263	79.4315
1	896	19.7225	5.45514	0.0874625	0.479773	0.25709	60.7696
1	1551.5	17.2405	3.74346	0.151449	0.561748	0.318507	62.5348
1	1624	37.8533	3.64656	0.158526	0.576943	0.343733	76.7093
1	1294.5	34.8376	4.06193	0.126362	0.505936	0.308581	73.4726
1	1649.5	88.0781	3.54351	0.161015	0.547984	0.354468	72.1353
1	1071.5	15.9283	4.33422	0.104594	0.444103	0.286977	83.7704
1	1332.5	62.7722	4.07359	0.130071	0.518464	0.328153	67.5457
1	1181.5	36.9333	4.23494	0.115331	0.496735	0.312449	87.2291
1	1665.5	58.3168	3.70809	0.162577	0.599307	0.337083	87.8894
1	979	28.1794	4.9502	0.0955645	0.459549	0.256957	63.3768
1	1243.5	17.9713	4.26481	0.121384	0.517788	0.284363	84.8293
1	1348	55.1404	4.06131	0.131584	0.537753	0.314986	76.3334
1	1094	41.9685	4.40546	0.10679	0.470639	0.263631	58.2747
1	1521.5	64.5188	3.63476	0.14852	0.540955	0.322333	66.7298
1	1193	16.3118	4.1051	0.116454	0.482406	0.302445	85.4723
1	1522	34.046	3.83431	0.148569	0.564869	0.334189	69.5041
1	1509	43.113	3.74237	0.1473	0.549587	0.330463	72.7075
1	1195.5	22.4115	4.02489	0.116698	0.469896	0.289962	73.6928
1	1448.5	36.1071	4.06052	0.141394	0.573941	0.318857	82.7687
1	1713.5	21.9332	3.76979	0.167262	0.626493	0.316635	81.7225
1	1396	40.3725	3.85706	0.13627	0.520399	0.314059	77.7186
1	1325	58.6029	4.12664	0.129339	0.532672	0.302108	84.4157
1	1281	44.4854	3.92115	0.125044	0.482578	0.311886	86.5054
1	1671.5	26.8002	3.69033	0.163162	0.59497	0.318659	83.1222
1	1412.5	16.6643	3.89029	0.13788	0.53372	0.30229	80.4483
1	1701.5	28.435	3.70803	0.166091	0.610417	0.351155	83.74
1	1279	53.9642	4.04549	0.124849	0.505398	0.317465	86.1165
1	1326	30.8437	4.11066	0.129437	0.530897	0.320786	67.5848
1	1143	29.7659	4.36312	0.111573	0.492642	0.297513	81.1936
1	1539	53.5705	3.8182	0.150229	0.566642	0.322159	80.4982
1	1494	56.2221	3.65629	0.145836	0.535126	0.35617	75.6641
1	1387	36.0222	3.69527	0.135391	0.495459	0.328433	77.0754
1	1445	21.774	3.99313	0.141053	0.562617	0.29424	87.4218
1	1499.5	45.4055	3.75825	0.146373	0.547732	0.330063	75.4469
1	1249	47.3373	4.08342	0.12192	0.49755	0.295806	79.8013
1	1071.5	50.6802	4.51438	0.104594	0.470946	0.290092	81.1087
1	1662	23.8441	3.84762	0.162235	0.623956	0.308645	83.8689
1	1283.5	41.5982	3.84246	0.125288	0.475523	0.323056	53.8609
1	1182.5	38.9121	3.84403	0.115429	0.442655	0.287283	77.7201
1	1348.5	28.0738	4.00043	0.131633	0.530453	0.306217	87.2934
1	761.5	30.4561	5.21113	0.0743334	0.39039	0.223781	51.107
1	1383.5	53.6367	4.16743	0.13505	0.551425	0.306716	76.6525
1	1497	82.9653	4.00985	0.146129	0.567392	0.323475	80.0539
1	1286.5	34.6885	4.01557	0.125581	0.504067	0.317112	86.6837
1	1145.5	49.909	4.74297	0.111817	0.523724	0.273236	75.4666
1	1382	19.9918	3.8566	0.134903	0.517872	0.307636	76.8076
1	1520.5	67.0268	3.54863	0.148423	0.532539	0.354569	85.9126
1	1233.5	24.1613	4.01375	0.120407	0.476659	0.299049	74.4898
1	1126.5	58.1071	4.49974	0.109963	0.493241	0.279672	46.4989
1	1185	55.7417	4.31841	0.115673	0.493189	0.28916	74.7662
1	1619.5	41.1636	3.76043	0.158087	0.575308	0.331779	83.1394
1	1575.5	26.1322	3.79251	0.153791	0.578904	0.30628	85.2789
1	1397	24.5544	3.74341	0.136367	0.512953	0.331099	82.1208
1	1192.5	25.5553	4.48543	0.116405	0.525882	0.270488	77.2646
1	1428	28.5358	3.61663	0.139393	0.504774	0.340862	74.5802
1	1188	24.7858	4.26738	0.115966	0.497832	0.306131	77.1492
1	1358.5	17.6046	3.78989	0.132609	0.502438	0.331753	80.2553
1	1507	63.4411	3.71163	0.147105	0.541157	0.351247	75.5386
1	1192.5	42.1541	4.24608	0.116405	0.49314	0.309386	64.5369
1	1090	30.9574	4.12276	0.1064	0.43457	0.300823	58.1727
1	1500.5	48.2874	3.87217	0.14647	0.566425	0.345384	75.2685
1	1253	42.6804	3.92223	0.122311	0.482315	0.317656	70.3923
1	1554.5	48.6759	3.32829	0.151742	0.504919	0.367297	71.2286
1	1302	21.4004	3.96564	0.127094	0.503826	0.31846	83.2757
1	1681.5	44.4481	3.58252	0.164139	0.588762	0.327158	75.4834
1	1237.5	23.2056	3.99387	0.120798	0.480822	0.30466	67.1086
1	1237.5	43.951	4.02021	0.120798	0.478228	0.307393	73.5721
1	1214.5	31.3461	4.55878	0.118553	0.542123	0.289462	78.6316
1	1619.5	70.2915	3.71301	0.158087	0.58609	0.325677	86.716
1	1361	54.3858	4.02957	0.132853	0.524812	0.297227	71.2814
1	1391.5	44.7203	3.92247	0.13583	0.529706	0.323711	78.7144
1	1296.5	43.347	4.02762	0.126557	0.507957	0.31929	80.6933
1	1759.5	22.0797	3.56546	0.171753	0.608282	0.321511	74.8232
1	1103.5	37.8252	4.60554	0.107717	0.493966	0.278028	77.3376
1	1581.5	49.5575	3.47962	0.154377	0.53202	0.347129	62.5236
1	1295	43.0259	4.20087	0.126411	0.529963	0.307162	78.3638
1	1491.5	39.9958	3.72657	0.145592	0.542709	0.335988	80.7825
1	1729	18.3112	3.51402	0.168775	0.592911	0.330104	88.97
1	978.5	53.4127	5.25698	0.0955157	0.497036	0.262329	73.8267
1	1536	13.9143	3.64258	0.149936	0.540862	0.350629	84.4336
1	1535.5	32.1827	3.51516	0.149887	0.517767	0.358157	80.7381
1	1495	47.5354	3.66226	0.145934	0.532291	0.344781	83.5215
1	1438.5	47.1393	3.97326	0.140418	0.553014	0.320187	79.3721
1	1508	27.1385	3.80365	0.147203	0.559547	0.305187	77.1301
1	1340	29.6034	3.84162	0.130803	0.503009	0.293272	74.5181
1	1380.5	25.5366	4.00527	0.134757	0.529451	0.306319	78.2932
1	1287.5	67.6658	4.19455	0.125679	0.514421	0.314457	71.8448
1	1417	81.7573	4.2154	0.13832	0.578908	0.283048	58.6893
1	1393.5	25.2557	4.1138	0.136026	0.559702	0.295472	80.1994
1	1463	34.4243	3.79652	0.14281	0.545093	0.326645	68.007
1	1568	26.1605	3.92252	0.153059	0.592419	0.321532	58.5306
1	1331.5	27.6543	3.85713	0.129974	0.480645	0.347878	47.0945
1	1214	39.9615	4.02591	0.118504	0.468416	0.318709	83.44
1	1070	17.9346	5.42433	0.104447	0.55942	0.228292	74.1382
1	1181.5	20.7628	4.40971	0.115331	0.511242	0.30123	81.0628
1	1227.5	20.4714	4.21195	0.119822	0.495118	0.307503	68.2207
1	1029	56.6668	4.98658	0.100445	0.483968	0.250169	76.9562
1	1500.5	32.1575	3.79528	0.14647	0.553079	0.3242	86.1444
1	1557	9.48184	3.80267	0.151986	0.568072	0.342431	80.7344
1	1430.5	46.0662	3.78125	0.139637	0.527943	0.323931	62.7277
1	1418.5	48.2967	4.0924	0.138466	0.566007	0.286715	81.4678
1	1106	15.3187	4.32544	0.107962	0.467867	0.287876	69.5089
1	1728.5	48.2539	3.65182	0.168726	0.61289	0.331057	83.0424
1	1375.5	60.586	3.54163	0.134269	0.475063	0.348096	76.9611
1	1071.5	20.1735	4.68413	0.104594	0.487498	0.269393	77.8611
1	1737	28.1943	3.24041	0.169556	0.549034	0.360226	74.0589
1	1282.5	70.8491	4.20445	0.12519	0.521505	0.275528	80.1731
1	1377.5	25.141	4.00214	0.134464	0.538181	0.299065	72.7163
1	1309.5	67.6856	4.41003	0.127826	0.556053	0.286791	65.59
1	1194	19.5515	4.30671	0.116552	0.496643	0.286898	86.1279
1	1178	38.5006	4.22309	0.11499	0.479919	0.314605	64.2559
1	1618.5	49.5622	3.89935	0.157989	0.606605	0.311009	85.604
1	1313	49.1318	4.12922	0.128168	0.523508	0.312777	81.625
1	1346.5	75.252	3.95498	0.131438	0.503784	0.318811	65.669
1	1426.5	43.4241	4.2764	0.139247	0.589956	0.295229	86.0458
1	1673.5	31.5519	3.56469	0.163358	0.581659	0.335219	84.0896
1	1110	47.7645	4.36479	0.108352	0.466676	0.277073	65.4123
1	1243	59.4196	3.84039	0.121335	0.464924	0.32356	72.8739
1	1590	36.5555	3.97107	0.155207	0.602711	0.311665	83.2119
1	1350	48.9759	4.02588	0.131779	0.529947	0.322868	80.1825
1	1221.5	58.0123	4.06479	0.119236	0.481446	0.32638	47.9836
1	1550	51.6983	3.65021	0.151302	0.544724	0.34531	80.6959
1	1157	49.2101	4.35817	0.11294	0.492244	0.294025	75.3145
1	1201.5	41.6682	4.74156	0.117284	0.561185	0.269141	74.6126
1	882.5	15.9229	5.24641	0.0861447	0.451658	0.230011	78.1868
1	1332	24.4999	3.8128	0.130022	0.499929	0.347202	70.976
1	838.5	26.9989	6.08418	0.0818497	0.498208	0.224576	70.7419
1	1204	32.3272	4.38673	0.117528	0.516855	0.298855	59.5273
1	1037.5	31.942	4.8053	0.101275	0.486534	0.263498	64.8826
1	1166	22.0333	4.58803	0.113818	0.521824	0.272539	72.8098
1	1632	25.1099	3.52965	0.159307	0.562046	0.349381	82.6972
1	1471.5	27.2814	3.58332	0.14364	0.515797	0.347729	88.7873
1	1341	45.086	3.93899	0.130901	0.513668	0.30257	80.4103
1	1258.5	23.2684	4.12469	0.122848	0.485773	0.31083	67.4576
1	1956	66.1005	4.0997	0.190934	0.782954	0.33232	77.9456
1	1553.5	21.9114	3.67051	0.151644	0.556092	0.361415	62.2588
1	1428	16.5894	3.8726	0.139393	0.532274	0.324108	83.3457
1	1147.5	42.2442	4.13306	0.112013	0.465961	0.308499	35.2442
1	1377	36.0812	4.07196	0.134415	0.547291	0.31798	75.4242
1	1255	50.9935	4.03855	0.122506	0.492153	0.318069	42.9625
1	1676.5	51.826	3.52492	0.163651	0.577913	0.368475	74.363
1	1500.5	21.0123	3.76848	0.14647	0.550956	0.321729	68.9322
1	1249	12.3399	4.14311	0.12192	0.504082	0.312013	80.2504
1	1087.5	37.1914	4.25696	0.106156	0.455838	0.286836	75.9381
1	1124.5	55.4195	4.35382	0.109767	0.483875	0.285868	84.9072
1	1403.5	17.8024	3.82976	0.137002	0.511761	0.334201	81.0084
1	1566.5	32.7712	3.90385	0.152913	0.595542	0.311777	82.12
1	1414	25.4394	4.09217	0.138027	0.565457	0.301193	79.2628
1	981.5	48.9211	4.69926	0.0958085	0.448061	0.282867	76.7341
1	1284	17.0053	4.06418	0.125337	0.510231	0.312244	66.7937
1	1486.5	26.9193	3.91903	0.145104	0.565313	0.305164	81.2086
1	1244.5	13.5759	4.18775	0.121481	0.504655	0.298719	78.9541
1	1260	50.7823	4.21398	0.122994	0.517788	0.306362	79.9313
1	960.5	38.283	4.71972	0.0937586	0.445878	0.272144	68.4306
1	768.5	12.8279	4.98624	0.0750167	0.374445	0.25886	70.5103
1	1189	22.1407	4.08863	0.116064	0.471741	0.317141	82.4037
1	1055.5	14.6514	4.45836	0.103032	0.457208	0.292578	77.22
1	1280	26.5755	4.39761	0.124946	0.548989	0.281021	67.0484
1	1026	45.6013	5.076	0.100152	0.501392	0.256622	78.3003
1	1198	26.2394	4.19843	0.116942	0.479523	0.305673	71.0562
1	1258.5	41.2128	4.05366	0.122848	0.496601	0.316893	71.7071
1	1040.5	32.2248	4.66613	0.101568	0.475084	0.259809	86.0924
1	1289.5	45.8031	3.79464	0.125874	0.477111	0.333434	68.0804
1	1624.5	31.8746	3.6479	0.158575	0.576491	0.34679	76.2815
1	1551	60.9545	3.79523	0.1514	0.566939	0.329767	81.9979
1	1188	22.699	4.32535	0.115966	0.499559	0.295225	68.9415
1	1543	24.418	3.76989	0.150619	0.571508	0.332246	73.1097
1	1746	22.4409	3.62696	0.170435	0.615425	0.342914	81.8052
1	1505	65.147	3.80682	0.14691	0.557964	0.318059	77.9669
1	1203.5	29.8586	4.78505	0.117479	0.549596	0.241487	78.8769
1	1211.5	58.1011	4.57771	0.11826	0.531428	0.278527	67.3083
1	1135	24.3085	4.71695	0.110792	0.521339	0.273599	72.2909
1	1333.5	37.3049	3.84941	0.130169	0.503917	0.332587	88.0971
1	1257	27.3216	3.92733	0.122701	0.484263	0.327158	81.7118
1	1604	20.5031	3.55906	0.156573	0.55344	0.33031	83.0919
1	1184.5	35.062	4.54687	0.115624	0.528554	0.288155	68.0217
1	1053	38.7083	4.70302	0.102788	0.484149	0.262539	75.0842
1	1296	40.6971	4.23991	0.126508	0.531955	0.293224	86.6096
1	1097	20.0894	4.38035	0.107083	0.465051	0.259213	83.7454
1	1067.5	30.6859	4.27784	0.104203	0.447747	0.286657	62.4555
1	1563.5	22.0167	3.58047	0.15262	0.544276	0.321711	66.48
1	1224	21.5514	4.30735	0.11948	0.491523	0.299919	79.0415
1	1122.5	31.5043	4.77947	0.109572	0.524504	0.271013	62.3726
1	1444.5	65.4846	3.8867	0.141004	0.547451	0.273207	79.8666
1	1461.5	33.9992	3.89152	0.142663	0.541443	0.325195	73.7194
1	1057	67.8805	4.15936	0.103178	0.422281	0.298024	74.6725
1	1543.5	44.2191	3.67903	0.150668	0.554585	0.342615	69.4546
1	1342	59.9832	3.79093	0.130999	0.497098	0.354914	83.2631
1	1324	33.335	4.14263	0.129241	0.534154	0.314429	77.386
1	1378.5	26.2914	4.11766	0.134561	0.554317	0.316994	72.0104
1	1434	29.3875	3.70981	0.139979	0.519175	0.344453	70.4508
1	1116.5	14.2306	4.36005	0.108986	0.475068	0.286526	73.4182
1	1432	17.9215	3.72982	0.139784	0.521479	0.312805	76.9719
1	1017	33.6171	4.53799	0.0992738	0.452054	0.268252	84.8255
1	1102.5	74.2336	4.7592	0.10762	0.499562	0.27242	62.7653
1	1231	10.6987	4.06643	0.120163	0.489519	0.315863	84.0141
1	1452	31.3336	3.74222	0.141736	0.529199	0.316478	81.1236
1	1167	55.3486	5.03216	0.113916	0.572458	0.2498	79.707
1	814.5	28.588	5.11681	0.0795069	0.408395	0.250254	73.7278
1	1374.5	30.1338	3.84516	0.134171	0.518835	0.350295	67.0736
1	1370.5	66.8581	3.64293	0.133781	0.49074	0.347606	71.4474
1	1103	28.4257	4.32423	0.107669	0.465614	0.281898	85.6941
1	1196.5	23.5966	4.09843	0.116796	0.482668	0.330958	72.3087
1	1495	29.9649	3.79548	0.145934	0.55232	0.303021	74.4048
1	1564	23.5209	3.85083	0.152669	0.585714	0.31421	81.897
1	1212.5	23.8509	4.11692	0.118357	0.48567	0.314457	73.7672
1	1404	46.8499	3.874	0.137051	0.528974	0.32613	81.78
1	1366.5	28.9617	4.18535	0.13339	0.558207	0.29208	89.1426
1	1289	54.9634	4.07197	0.125825	0.511372	0.275292	69.3099
1	1920	23.1471	3.39732	0.18742	0.636653	0.340507	78.7826
1	1090.5	12.2563	4.70676	0.106449	0.501879	0.279388	75.2585
1	763	57.3189	5.331	0.0744798	0.400652	0.229859	63.9188
1	1541	11.4222	3.62652	0.150424	0.545535	0.314051	85.4874
1	1434.5	50.8493	3.82685	0.140028	0.536284	0.31113	52.9695
1	1663	34.6155	3.63493	0.162333	0.590081	0.32423	85.0348
1	1076	11.9195	4.22552	0.105033	0.439582	0.302381	82.7671
1	871.5	10.8481	4.88303	0.0850709	0.412656	0.256116	63.498
1	1202	14.8799	3.91063	0.117333	0.457855	0.31908	79.7374
1	1002	23.1518	4.63147	0.0978096	0.450783	0.276	68.9138
1	777.5	17.3325	5.09846	0.0758952	0.391189	0.24864	40.8251
1	1259	50.9121	3.9354	0.122897	0.479121	0.296631	64.4865
1	1575	69.0152	3.50695	0.153743	0.537888	0.351815	64.2863
1	1259	10.3764	4.20672	0.122897	0.516913	0.275225	86.4321
1	1248	28.8901	3.8494	0.121823	0.458702	0.334662	67.2003
1	746	37.4289	6.09796	0.0728203	0.431945	0.228831	61.1486
1	1640.5	23.1562	4.02586	0.160136	0.637745	0.302132	84.2034
1	1051	33.2658	4.77077	0.102593	0.489768	0.278291	62.428
1	1769	21.3889	3.36239	0.17268	0.581586	0.376103	65.2027
1	1311.5	19.7933	3.85756	0.128021	0.491197	0.337618	69.9468
1	1254	75.887	4.2266	0.122408	0.512818	0.276711	77.1704
1	589.5	59.9405	7.11979	0.0575437	0.406693	0.169118	76.4488
1	1264.5	55.4459	4.29205	0.123433	0.529998	0.270838	74.6385
1	1165	36.1318	4.22476	0.113721	0.483054	0.30499	74.7357
1	1715.5	20.7659	3.58476	0.167458	0.593345	0.343757	80.0724
1	924.5	33.9597	4.95082	0.0902445	0.447293	0.243933	72.2312
1	1373	23.5419	3.81718	0.134025	0.509611	0.334732	77.6822
1	1091.5	31.6583	4.51461	0.106546	0.483445	0.269763	82.3191
1	960.5	37.0163	4.73116	0.0937586	0.445236	0.278574	76.5228
1	1179	28.5138	4.62447	0.115087	0.495806	0.278055	56.6502
1	989	26.4289	4.24832	0.0965406	0.41161	0.292636	52.865
1	1737.5	20.8614	3.63754	0.169605	0.614427	0.328882	77.6352
1	1093.5	17.3002	4.47614	0.106741	0.474036	0.284678	68.6388
1	920.5	68.6708	5.13771	0.0898541	0.46161	0.239846	54.2175
1	1323	25.1192	4.24863	0.129144	0.539208	0.30001	80.4177
1	1076.5	59.5206	5.27938	0.105082	0.548445	0.250435	85.7456
1	1333	26.5063	3.75582	0.13012	0.489087	0.331633	70.5306
1	1190	63.4066	4.8307	0.116161	0.561141	0.271623	69.3165
1	1292	65.6784	4.07409	0.126118	0.512851	0.322864	78.5206
1	1500	25.0109	3.64536	0.146422	0.533318	0.315693	76.7248
1	820	27.9974	4.67901	0.0800438	0.373693	0.2578	48.3504
1	1100	25.6357	4.63283	0.107376	0.493535	0.272506	77.0881
1	1313	32.4144	4.08006	0.128168	0.51823	0.311601	76.8951
1	1093	43.8445	4.48162	0.106693	0.478281	0.288974	79.4231
1	953.5	12.8878	4.75178	0.0930753	0.448907	0.272719	66.3893
1	936.5	19.7486	4.62705	0.0914159	0.422981	0.261999	78.8525
1	1091	22.9194	4.60795	0.106497	0.492469	0.287088	75.0799
1	1216	62.3024	4.0795	0.118699	0.477862	0.312087	57.609
1	1212	20.8585	4.07182	0.118309	0.483266	0.315943	80.4817
1	693.5	35.7963	6.3145	0.0676956	0.423086	0.221474	72.601
1	1172.5	39.069	4.32322	0.114453	0.49791	0.295794	78.6036
1	845.5	40.2974	5.34432	0.082533	0.439005	0.262033	66.1574
1	604.5	18.8091	6.59201	0.0590079	0.392463	0.169258	68.9701
1	998.5	15.8476	4.5401	0.097468	0.443718	0.289314	54.8526
1	1526	22.0895	3.69027	0.14896	0.540561	0.31616	81.8579
1	995	27.5691	4.84773	0.0971263	0.469082	0.280622	63.433
1	1217.5	25.0682	4.34623	0.118846	0.517423	0.306125	63.1906
1	1308.5	20.711	3.96785	0.127728	0.509194	0.31563	75.7469
1	1426.5	41.9622	4.90288	0.139247	0.686364	0.267623	83.2447
1	1090	29.5714	5.01877	0.1064	0.528179	0.250515	81.2785
1	1043	17.6454	4.43074	0.101812	0.455718	0.268282	65.4527
1	1524.5	32.8412	3.96604	0.148813	0.590201	0.300917	82.396
1	1199	40.7526	4.23221	0.11704	0.477558	0.292113	79.4692
1	1184	14.7272	4.15304	0.115575	0.482438	0.299242	84.087
1	1106.5	43.8832	4.31706	0.10801	0.457222	0.281898	70.8555
1	639.5	40.0314	6.55843	0.0624244	0.397523	0.227012	71.7544
1	1377	71.4881	3.72536	0.134415	0.500339	0.334612	64.0476
1	1398.5	68.7107	3.92905	0.136514	0.50534	0.296689	68.7339
1	1108.5	10.6329	4.52963	0.108206	0.489483	0.2828	80.4374
1	1321.5	61.1983	3.89095	0.128997	0.506224	0.333332	69.2672
1	1266.5	60.0716	4.28606	0.123629	0.534299	0.281214	75.1543
1	670.5	40.5685	6.27918	0.0654505	0.39781	0.198407	83.8233
1	1169.5	18.977	4.26141	0.11416	0.489335	0.301056	75.7804
1	1173	29.8404	4.29587	0.114502	0.485215	0.279042	42.6828
1	1388	50.3009	3.96638	0.135489	0.53091	0.328758	66.7533
1	1266	29.0035	4.33122	0.12358	0.526943	0.301012	79.6999
1	1147	8.00892	4.63022	0.111964	0.517165	0.266337	84.1371
1	1042	19.0979	4.95395	0.101714	0.505652	0.242396	86.359
1	1096	23.4562	4.26273	0.106985	0.451937	0.292998	69.9795
1	1358	24.8626	3.75842	0.13256	0.498566	0.315751	79.9525
1	1269.5	30.8211	3.91755	0.123921	0.482036	0.312446	74.505
1	1413.5	20.059	3.92431	0.137978	0.538902	0.31518	84.117
1	1076	38.0061	4.31546	0.105033	0.451766	0.297059	82.9545
1	1278	42.624	4.13665	0.124751	0.514113	0.3212	66.2143
1	1330	43.3853	3.89251	0.129827	0.504894	0.312769	77.1185
1	1115.5	23.5166	4.57814	0.108889	0.497398	0.280216	65.3571
1	1373	34.4709	3.72335	0.134025	0.492255	0.327328	80.1123
1	982.5	56.7896	4.3188	0.0959061	0.416202	0.288889	80.8964
1	1242.5	30.4938	4.40729	0.121286	0.535249	0.286072	78.521
1	1111	55.264	4.67585	0.10845	0.504761	0.260685	58.5576
1	1161	34.0353	4.32428	0.11333	0.485776	0.270127	76.9732
1	1487.5	65.925	4.2762	0.145201	0.593217	0.268983	81.5593
1	1442	25.0523	3.84025	0.14076	0.54054	0.293772	80.9427
1	1240.5	15.5696	4.03701	0.121091	0.48527	0.306717	79.3121
1	777.5	53.6965	5.2124	0.0758952	0.393477	0.245904	65.5204
1	1671	26.1088	3.64589	0.163114	0.59405	0.334673	87.4489
1	1377	14.6315	3.88411	0.134415	0.521669	0.29439	81.3793
1	1322	39.5743	3.646	0.129046	0.470356	0.342703	77.486
1	1475.5	48.1814	4.1353	0.14403	0.585108	0.278304	86.976
1	1319.5	78.3359	3.91505	0.128802	0.495703	0.314837	64.0345
1	1150	28.4957	4.40013	0.112257	0.486423	0.288749	78.2111
1	1275	18.6917	4.20012	0.124458	0.528985	0.305896	86.9312
1	713.5	46.7352	5.93656	0.0696479	0.413232	0.221913	47.4096
1	1265.5	19.0895	4.24579	0.123531	0.523384	0.305447	79.2832
1	718	57.757	6.85748	0.0700871	0.473959	0.193067	67.896
1	970	18.0298	4.66907	0.094686	0.441618	0.276198	75.8099
1	1488	61.6703	3.8522	0.14525	0.558598	0.324879	71.6805
1	962.5	41.8692	5.34596	0.0939539	0.516123	0.244032	65.8009
1	1056.5	38.9538	4.41624	0.10313	0.456268	0.275372	62.493
1	1214	25.8665	4.63815	0.118504	0.549474	0.272281	79.2905
1	1163.5	32.7865	4.47704	0.113574	0.511882	0.279834	82.991
1	1079	52.5301	4.71791	0.105326	0.490893	0.257774	76.3486
1	1350.5	44.3799	3.95601	0.131828	0.521114	0.301845	72.103
1	1023	31.3773	4.48132	0.0998595	0.448135	0.299731	70.6915
1	1539	25.7276	3.77402	0.150229	0.564833	0.316399	75.7339
1	1252	41.0503	4.29548	0.122213	0.518898	0.28471	83.0798
1	695	35.3418	6.63613	0.067842	0.439356	0.207625	75.4215
1	243	29.5472	10.703	0.0237203	0.254196	0.185958	43.8855
1	1122.5	69.1767	4.78655	0.109572	0.525052	0.24984	85.4345
1	1172.5	35.9228	4.68355	0.114453	0.535141	0.282273	83.8295
1	1150	29.2371	3.97533	0.112257	0.445345	0.317536	67.4727
1	1059.5	12.6091	4.57702	0.103422	0.472296	0.278168	66.912
1	1072.5	63.9046	5.74084	0.104691	0.593988	0.23835	66.2754
1	1322	32.0853	3.61367	0.129046	0.463581	0.33075	61.7981
1	774	28.2115	5.98485	0.0755535	0.446608	0.277209	71.1009
1	1288.5	34.3637	3.97661	0.125776	0.498789	0.307348	74.0032
1	832	16.1377	4.20156	0.0812152	0.338468	0.27117	49.0536
1	1202	28.8201	4.54021	0.117333	0.530845	0.282236	80.2517
1	1459	35.8502	4.06891	0.142419	0.577656	0.322782	86.0051
1	1033.5	54.9502	4.92454	0.100884	0.488731	0.242489	82.3307
1	1421	44.769	3.38325	0.13871	0.465321	0.367143	65.8451
1	1618	60.278	3.50843	0.15794	0.556735	0.350212	80.9437
1	1661	62.9096	3.4802	0.162138	0.563502	0.345438	84.2635
1	1046	62.0883	4.72273	0.102105	0.474917	0.240881	77.6594
1	1239	46.5043	4.14077	0.120944	0.501505	0.29674	66.6207
1	1502.5	45.8755	3.87798	0.146666	0.566785	0.315276	71.7483
1	1247	55.4701	4.21199	0.121725	0.51094	0.312824	66.8091
1	1509	55.9562	3.77988	0.1473	0.552677	0.30628	77.3977
1	1316	78.9881	4.07626	0.128461	0.525351	0.316306	74.2944
1	954.5	42.3039	4.81621	0.0931729	0.424222	0.247448	69.6275
1	716	63.1433	6.07601	0.0698919	0.422873	0.226862	60.842
1	1548.5	16.2586	3.56192	0.151156	0.537215	0.324435	78.919
1	1790	51.7201	3.62326	0.17473	0.63262	0.322331	77.0668
1	628.5	32.7234	6.13456	0.0613507	0.358213	0.233322	78.9131
1	1376	34.4387	4.16339	0.134317	0.547435	0.303095	80.2789
1	1227	59.6596	4.23445	0.119773	0.506255	0.300573	58.8382
1	960.5	47.3839	5.55105	0.0937586	0.508995	0.263973	80.6367
1	1522	55.4759	3.71538	0.148569	0.55099	0.305118	76.8153
1	1236.5	41.6442	4.07456	0.1207	0.488017	0.288268	77.6966
1	617.5	50.1896	7.14195	0.0602769	0.429573	0.189594	87.0259
1	1579.5	57.6895	3.7805	0.154182	0.580173	0.32118	79.4194
1	1697	45.9786	4.31962	0.165652	0.715608	0.313198	80.6522
1	1018	30.8876	5.04886	0.0993715	0.50214	0.256608	80.1188
1	531	56.1197	6.57707	0.0518332	0.337525	0.165005	51.1886
1	1000	43.576	4.51009	0.0976144	0.439911	0.268718	83.7356
1	960	67.5414	5.21271	0.0937098	0.488732	0.234738	65.2073
1	892	23.5886	4.79337	0.087072	0.417615	0.238145	75.1099
1	877	9.64159	5.51374	0.0856078	0.467203	0.242824	79.7807
1	1200	56.6414	4.93582	0.117137	0.541269	0.261536	68.4647
1	1641	18.8349	3.8917	0.160185	0.615601	0.337714	81.7825
1	1393.5	55.5365	4.0647	0.136026	0.552835	0.278151	69.6427
1	968	36.5135	4.7758	0.0944907	0.450899	0.270992	81.4011
1	762.5	23.4111	5.46866	0.074431	0.403331	0.224477	60.7825
1	908.5	67.873	5.01249	0.0886827	0.433258	0.241067	84.1822
1	1128.5	51.4143	4.13258	0.110158	0.453833	0.290901	73.0684
1	1077.5	65.8864	4.90818	0.10518	0.482718	0.28079	65.5767
1	985.5	22.8469	5.22582	0.096199	0.48805	0.205757	81.4128
1	1239.5	66.0424	3.963	0.120993	0.478433	0.321532	76.9316
1	972	34.4186	4.66389	0.0948812	0.443839	0.286836	62.7412
1	1218	57.7335	4.21445	0.118894	0.484237	0.293533	86.4375
1	747.5	57.7569	8.99313	0.0729668	0.600843	0.332024	59.397
1	486.5	22.0738	8.52175	0.0474894	0.407954	0.172812	86.8617
1	1057.5	46.8142	4.7451	0.103227	0.496434	0.254976	71.3778
1	768.5	33.5536	6.08517	0.0750167	0.446906	0.205762	70.4953
1	771.5	77.5083	6.84848	0.0753095	0.433417	0.218734	57.5798
1	1328	16.8653	3.91226	0.129632	0.506282	0.323677	72.8438
1	1066.5	34.879	5.00824	0.104106	0.521167	0.235936	79.8705
1	857	23.2876	5.57916	0.0836555	0.461558	0.249773	60.3684
1	844	36.837	5.50171	0.0823866	0.45471	0.253432	53.6551
1	152	47.7128	19.2718	0.0148374	0.28113	0.0791156	41.0453
1	553	19.8114	9.29828	0.0539808	0.501948	0.213804	64.978
1	148.5	3.91451	15.8881	0.0144957	0.229053	0.126187	52.9013
1	127.5	2.88696	18.2967	0.0124458	0.227651	0.117844	34.2749
1	131	40.63	17.5491	0.0127875	0.224118	0.121508	19.4123
1	119.5	4.00754	19.5686	0.0116649	0.228275	0.101835	56.4646
1	111	10.3611	20.6856	0.0108352	0.222829	0.0957173	65.7241
1	104	5.97063	21.0897	0.0101519	0.213343	0.087133	85.9349
1	101.5	4.60248	21.0589	0.00990786	0.20895	0.0908208	66.2902

## Sheet: phyb_hAT_B
Predicate	Pixel count	SSE	LS Ratio	Surface	Length	Width	Axes angle
1	1027	68.6373	5.28932	0.10025	0.532529	0.24811	83.4052
1	1426.5	28.6241	3.8305	0.139247	0.532249	0.324093	81.6527
1	1423	28.0007	4.00836	0.138905	0.546468	0.336987	74.8352
1	1281.5	51.0469	4.07821	0.125093	0.509601	0.314214	67.2246
1	1365.5	74.7545	4.2202	0.133292	0.562158	0.294329	68.2532
1	1299	41.0465	4.08044	0.126801	0.514531	0.292998	83.737
1	1271	12.1771	4.35537	0.124068	0.52168	0.284151	84.2498
1	1215.5	33.3058	3.98172	0.11865	0.475156	0.315802	68.9524
1	1255.5	22.8585	3.80074	0.122555	0.46451	0.322061	73.2861
1	1377.5	21.691	3.8746	0.134464	0.52128	0.31693	76.8138
1	1132	27.3619	3.87526	0.1105	0.426225	0.30752	75.5606
1	1640	24.5008	3.50879	0.160088	0.558679	0.334932	89.5042
1	1470	21.7586	3.77151	0.143493	0.539155	0.335704	85.6272
1	959	51.6143	4.86043	0.0936122	0.441477	0.250664	79.298
1	1378.5	41.7726	3.86821	0.134561	0.527689	0.329421	74.8487
1	1366	29.567	4.05483	0.133341	0.540046	0.316916	82.8966
1	1474	12.4886	3.82205	0.143884	0.540461	0.321184	79.4387
1	1301.5	17.1189	4.06517	0.127045	0.51646	0.286177	85.7676
1	1815	34.0294	3.64218	0.17717	0.645301	0.328426	81.5265
1	1457	14.9359	3.62881	0.142224	0.508776	0.333242	79.0088
1	1306	22.81	4.01028	0.127484	0.516381	0.33198	72.4481
1	1522.5	15.5025	3.85794	0.148618	0.570988	0.314105	82.8077
1	1335.5	51.4728	3.8336	0.130364	0.495457	0.326557	70.2033
1	1349	25.6092	4.31616	0.131682	0.558964	0.279668	81.3405
1	1275.5	34.8754	4.27355	0.124507	0.53184	0.295859	81.9186
1	1223	17.0298	3.99593	0.119382	0.477255	0.30329	79.2736
1	1315	61.0529	3.84826	0.128363	0.492657	0.33398	77.0922
1	1510.5	29.0586	3.7656	0.147447	0.555842	0.327598	74.3008
1	1472	42.2317	3.87265	0.143688	0.552798	0.346391	58.8445
1	1377	37.8502	3.67628	0.134415	0.496101	0.329161	79.107
1	911	16.0698	4.47962	0.0889267	0.396472	0.254024	65.9606
1	1213	24.5295	4.02388	0.118406	0.468202	0.29944	76.0434
1	1515.5	48.7221	3.56347	0.147935	0.523602	0.34725	70.2502
1	1285	36.5688	4.06083	0.125435	0.505197	0.303429	77.944
1	1162	56.8352	4.42206	0.113428	0.504835	0.27707	68.652
1	1299	44.026	4.05511	0.126801	0.512291	0.311491	77.916
1	1117	12.6224	4.22395	0.109035	0.461355	0.297121	68.3063
1	1236.5	27.7885	3.87551	0.1207	0.469888	0.326203	53.8446
1	1564.5	28.9482	3.53433	0.152718	0.529114	0.343028	78.6846
1	1724.5	25.4067	3.52313	0.168336	0.591349	0.325822	76.3714
1	1272	15.9104	4.13672	0.124166	0.515365	0.287285	79.8676
1	1287	38.0533	4.2153	0.12563	0.529767	0.302069	65.3705
1	1066	60.2843	4.46219	0.104057	0.46011	0.268523	71.8498
1	1428.5	41.0308	3.70167	0.139442	0.510265	0.334783	53.2723
1	1210	35.4322	4.14008	0.118113	0.479755	0.285989	62.2945
1	1093	46.1336	4.75614	0.106693	0.519143	0.269188	76.0349
1	1511	22.2335	3.89121	0.147495	0.574514	0.317506	84.9179
1	1418.5	20.8669	3.9133	0.138466	0.537639	0.319074	79.403
1	1071.5	22.6531	4.48868	0.104594	0.46975	0.283666	83.2918
1	1476.5	39.278	3.79785	0.144128	0.545553	0.328713	81.4883
1	1099.5	62.894	4.48392	0.107327	0.471655	0.282876	64.7826
1	1327.5	41.0954	3.79122	0.129583	0.498153	0.325666	46.2326
1	1028.5	32.3413	4.40278	0.100396	0.440732	0.28737	64.0181
1	1716.5	22.2846	3.62098	0.167555	0.606474	0.31616	83.7715
1	1200.5	25.8236	4.34784	0.117186	0.507178	0.291229	84.8304
1	1293.5	28.03	4.09468	0.126264	0.512523	0.313264	71.6094
1	1108.5	53.2202	4.27301	0.108206	0.470096	0.297244	57.9679
1	1119	46.2757	4.33847	0.109231	0.473649	0.313138	66.8289
1	1065	10.1813	4.37665	0.103959	0.455389	0.286072	84.445
1	1397	9.14334	3.78222	0.136367	0.514941	0.314112	78.3561
1	1441.5	14.676	4.04252	0.140711	0.568963	0.318745	82.9629
1	1349.5	27.989	4.12344	0.131731	0.543196	0.305899	79.2387
1	1176	30.6035	4.50213	0.114795	0.508348	0.270788	72.4858
1	1053	52.89	4.62065	0.102788	0.476137	0.273947	75.0089
1	1367	21.6552	3.928	0.133439	0.519175	0.296442	81.5496
1	1184.5	37.9796	4.13091	0.115624	0.479119	0.297222	80.5827
1	1342	26.3062	4.14332	0.130999	0.537844	0.315572	54.4525
1	1404.5	41.3512	3.80461	0.137099	0.515035	0.323073	77.122
1	1434	64.4857	3.72498	0.139979	0.52346	0.341003	67.9706
1	1065	18.509	4.44097	0.103959	0.456679	0.290298	77.9497
1	1368	28.8226	3.58564	0.133536	0.478162	0.336354	76.5469
1	1369	40.1882	3.989	0.133634	0.52881	0.313787	78.9411
1	1802	56.9246	3.5579	0.175901	0.625896	0.344035	85.2856
1	1671	42.2216	3.54307	0.163114	0.577054	0.324956	73.796
1	1313.5	45.7058	3.91239	0.128217	0.496623	0.30652	73.0555
1	1340	41.1884	4.28645	0.130803	0.559688	0.303762	72.1764
1	1100.5	18.5537	4.41949	0.107425	0.474168	0.274107	84.9203
1	1126	24.85	4.02336	0.109914	0.432792	0.290079	80.8314
1	1116.5	26.0358	4.21902	0.108986	0.454149	0.283325	81.8888
1	1273.5	63.6233	3.94195	0.124312	0.492641	0.325766	77.1968
1	1558	24.3039	3.63301	0.152083	0.552625	0.336789	85.743
1	926	49.5771	4.80963	0.0903909	0.437355	0.2585	69.6571
1	1365.5	56.2337	3.74579	0.133292	0.499398	0.297877	74.0364
1	1480	24.473	3.74946	0.144469	0.541346	0.337047	82.1694
1	1548.5	35.8743	3.76799	0.151156	0.568086	0.318423	74.7968
1	1189	23.2247	4.1905	0.116064	0.48295	0.296102	66.1954
1	1485.5	28.6285	3.59604	0.145006	0.516824	0.344191	40.9731
1	1282.5	40.3135	3.77821	0.12519	0.469947	0.321909	64.0353
1	1460	30.7481	3.4473	0.142517	0.491736	0.355714	84.5703
1	1415	26.3493	3.9715	0.138124	0.543432	0.30861	77.242
1	1346.5	40.678	3.9564	0.131438	0.512848	0.324497	63.1254
1	893	29.13	5.13333	0.0871697	0.440224	0.25752	79.7598
1	1354.5	64.5379	3.89491	0.132219	0.52039	0.337387	56.7211
1	1370.5	40.7325	3.79977	0.133781	0.506256	0.320949	78.7374
1	1637.5	34.3021	3.56904	0.159844	0.570833	0.32648	76.2959
1	1545	33.2426	3.71104	0.150814	0.559465	0.329421	72.5025
1	1208.5	34.3316	3.9817	0.117967	0.458005	0.307218	82.5783
1	885	44.9467	5.841	0.0863887	0.505694	0.197278	57.2064
1	1922.5	74.6873	3.52685	0.187664	0.664251	0.373861	64.9147
1	1285	14.1249	3.87141	0.125435	0.484165	0.302436	65.3592
1	1684.5	82.0825	4.19777	0.164431	0.685756	0.26385	77.6126
1	1682.5	56.9329	3.83196	0.164236	0.621622	0.32724	80.7106
1	1278.5	18.7319	4.13056	0.1248	0.509612	0.28752	77.8763
1	1315	30.137	4.04639	0.128363	0.519331	0.311146	77.6488
1	985.5	29.8122	4.52249	0.096199	0.436989	0.280858	47.2047
1	1445.5	10.1982	4.02083	0.141102	0.562536	0.295951	81.307
1	1301	34.2775	4.19866	0.126996	0.533031	0.270268	75.9916
1	1624.5	28.0664	3.55549	0.158575	0.557439	0.36748	78.9337
1	1695.5	39.9079	3.71223	0.165505	0.605347	0.323044	85.5872
1	1221	18.5383	4.40018	0.119187	0.523852	0.286076	75.9882
1	1289.5	22.1181	3.94993	0.125874	0.499402	0.326239	77.7726
1	1240.5	28.6011	4.4021	0.121091	0.53552	0.303204	85.2034
1	1438	29.2508	3.79195	0.14037	0.533085	0.319461	71.0003
1	1296.5	28.1069	3.85893	0.126557	0.475902	0.325333	63.9231
1	1482.5	13.7822	3.60854	0.144713	0.51858	0.307473	80.28
1	1170.5	21.1121	4.35305	0.114258	0.493332	0.285026	69.1583
1	1324.5	23.7675	3.86781	0.12929	0.500137	0.328675	88.2575
1	865	33.0125	5.48831	0.0844365	0.462453	0.242517	59.1774
1	1682.5	25.167	3.77866	0.164236	0.612434	0.318766	86.5444
1	1076.5	69.987	4.66336	0.105082	0.490904	0.250507	68.1666
1	1394	29.9554	3.75246	0.136074	0.510741	0.318844	77.1602
1	868.5	28.8915	5.63211	0.0847781	0.477924	0.227938	76.7757
1	1394	17.4214	3.58489	0.136074	0.487786	0.345116	66.7674
1	1416	15.5976	3.82722	0.138222	0.529373	0.329094	80.109
1	1186.5	44.31	4.18491	0.115819	0.484081	0.293474	77.3056
1	1083	36.2828	4.64759	0.105716	0.492797	0.290143	81.2707
1	1319	23.0166	3.92209	0.128753	0.50973	0.321131	83.8172
1	1446.5	44.6994	3.7735	0.141199	0.532631	0.319809	78.504
1	1500	24.4265	3.73765	0.146422	0.548582	0.341803	74.5016
1	1592.5	19.2952	3.74124	0.155451	0.573376	0.314781	79.5808
1	1688	29.3987	3.62627	0.164773	0.595866	0.3251	80.0772
1	1133.5	28.1496	4.63044	0.110646	0.510163	0.274932	77.6277
1	1204.5	32.2604	4.32822	0.117577	0.509469	0.288049	72.4271
1	1161	47.1621	4.32045	0.11333	0.484367	0.294075	63.6962
1	1224.5	18.0183	3.99569	0.119529	0.479637	0.28686	81.4655
1	1087.5	30.651	4.4002	0.106156	0.468822	0.304435	79.1922
1	1308.5	18.8266	3.94411	0.127728	0.506861	0.322602	63.9474
1	1441.5	47.3385	3.61589	0.140711	0.508571	0.334154	65.881
1	1538	26.4646	3.65247	0.150131	0.543296	0.370753	61.5241
1	1206.5	30.2459	4.086	0.117772	0.485021	0.327923	35.9351
1	1288	72.8516	4.06073	0.125727	0.50223	0.294831	85.9927
1	1394	43.447	4.42185	0.136074	0.594891	0.274828	73.8542
1	1224.5	60.0904	4.29546	0.119529	0.5007	0.298216	74.545
1	1204	52.1094	4.15246	0.117528	0.487452	0.311948	79.4113
1	882.5	62.2886	4.70846	0.0861447	0.399238	0.273845	75.0742
1	1318	29.9192	4.02765	0.128656	0.51913	0.308419	70.8333
1	1426.5	11.5219	3.88133	0.139247	0.54169	0.313514	79.6724
1	1497	25.3499	3.77397	0.146129	0.544629	0.322855	71.8078
1	1332.5	29.2222	3.99639	0.130071	0.519289	0.320396	80.1368
1	1548	9.88624	3.57551	0.151107	0.514387	0.381408	52.4243
1	936.5	9.57029	4.66912	0.0914159	0.425709	0.263619	62.0644
1	1647	56.9542	3.88309	0.160771	0.584177	0.335245	69.2327
1	1324.5	39.3526	3.99807	0.12929	0.519466	0.339674	64.9882
1	1555	73.1076	4.1144	0.15179	0.618913	0.285815	82.6288
1	1025	14.1146	4.71629	0.100055	0.473674	0.268128	75.5919
1	1254	42.2987	4.18428	0.122408	0.508748	0.288815	74.1956
1	1355.5	18.3939	3.83809	0.132316	0.507871	0.289894	56.8225
1	1460	41.0317	4.09144	0.142517	0.582878	0.291871	85.9489
1	1105	42.4326	4.06048	0.107864	0.438752	0.288917	78.5244
1	1439	11.486	3.58451	0.140467	0.503037	0.351754	75.1896
1	1326.5	55.886	3.89545	0.129486	0.50619	0.311847	62.6052
1	1388.5	35.6339	4.12661	0.135538	0.553222	0.31201	83.5461
1	1477	21.9371	3.89383	0.144176	0.558429	0.316097	81.0661
1	1234.5	41.2751	3.91792	0.120505	0.470829	0.307921	79.1946
1	1010	18.5828	4.5847	0.0985905	0.449469	0.270931	81.1074
1	1181	17.6813	4.36002	0.115283	0.512811	0.322805	85.5692
1	1518	22.8898	3.58965	0.148179	0.530494	0.315204	82.3858
1	938	64.6721	5.00884	0.0915623	0.447481	0.250812	53.143
1	1135	23.3255	4.23478	0.110792	0.468613	0.293572	79.1798
1	1221.5	10.1368	3.98245	0.119236	0.475526	0.315075	75.0761
1	1397.5	32.6295	3.86556	0.136416	0.52751	0.292466	77.623
1	1152	14.8872	4.59226	0.112452	0.509356	0.278935	82.4564
1	1353.5	15.4779	4.12144	0.132121	0.524898	0.313622	70.6511
1	948	12.146	4.58326	0.0925385	0.429212	0.267362	73.868
1	950	25.6907	5.81129	0.0927337	0.532106	0.216967	79.4729
1	1097.5	33.1345	4.13193	0.107132	0.440593	0.286392	83.3539
1	1473.5	38.6866	3.643	0.143835	0.528298	0.330431	80.9623
1	1248.5	15.1661	4.26695	0.121872	0.520589	0.279894	77.9651
1	1250.5	25.2621	4.31217	0.122067	0.52936	0.304355	68.6211
1	1043.5	18.772	4.45231	0.101861	0.456899	0.291883	71.4165
1	1391.5	28.3337	4.0221	0.13583	0.546319	0.297631	77.9812
1	1049	42.9899	4.85247	0.102398	0.496187	0.275785	86.4134
1	1245	44.6147	3.95634	0.12153	0.479386	0.284196	71.6523
1	895	8.60218	4.81419	0.0873649	0.421951	0.256612	82.4993
1	1265	51.7437	4.0571	0.123482	0.490995	0.318186	53.8613
1	1509.5	27.3985	3.58136	0.147349	0.526993	0.336891	85.1609
1	1102	12.3948	4.33517	0.107571	0.461589	0.282433	66.9009
1	1102.5	28.0271	4.35898	0.10762	0.470281	0.278525	83.8695
1	1079.5	12.0677	4.27362	0.105375	0.454117	0.289356	46.6449
1	1322.5	20.5903	4.01425	0.129095	0.518493	0.308419	80.0471
1	1101	14.1007	4.33669	0.107473	0.470705	0.300646	83.3633
1	1258.5	56.9311	3.94739	0.122848	0.484878	0.298444	74.8225
1	1399	26.3687	3.66768	0.136563	0.497493	0.311549	79.2234
1	1471.5	53.4227	3.87516	0.14364	0.556881	0.314351	79.2962
1	1450.5	24.9328	3.47341	0.14159	0.489952	0.345447	57.8334
1	1281.5	26.7915	4.10633	0.125093	0.507483	0.288834	77.1082
1	1706	13.2184	3.62156	0.16653	0.601835	0.323317	76.2879
1	1458.5	30.38	3.89432	0.142371	0.538766	0.327036	78.9696
1	1409.5	26.1922	3.78385	0.137587	0.521102	0.340367	71.0605
1	1561.5	24.3373	3.95917	0.152425	0.601953	0.303641	77.3948
1	1417	38.4565	3.89519	0.13832	0.529821	0.303528	72.9314
1	1449	38.4517	3.68098	0.141443	0.513002	0.341174	70.7646
1	910	36.6222	4.96626	0.0888291	0.44099	0.262331	67.774
1	1135	14.5371	4.2756	0.110792	0.471341	0.292967	70.911
1	1334.5	36.2232	3.97456	0.130266	0.517743	0.297992	79.7858
1	1020	15.7517	4.5077	0.0995667	0.445591	0.267778	84.9681
1	1540.5	20.2302	3.89037	0.150375	0.583204	0.304745	80.5406
1	936.5	27.6426	4.91129	0.0914159	0.448962	0.251655	76.3407
1	1551.5	45.5614	3.51571	0.151449	0.522864	0.327106	75.4493
1	1304	20.749	4.19598	0.127289	0.532116	0.306671	65.9101
1	1166.5	47.7165	4.11769	0.113867	0.467996	0.306691	73.7776
1	1123.5	54.6201	4.3688	0.10967	0.476188	0.278713	79.0101
1	1505.5	30.8457	3.59842	0.146958	0.527423	0.371027	55.3653
1	1579.5	66.3967	4.02187	0.154182	0.619954	0.307314	81.0921
1	1249.5	19.6603	4.03176	0.121969	0.498828	0.300732	83.4537
1	1333.5	27.0113	3.9347	0.130169	0.513154	0.320898	84.7853
1	1159.5	14.7018	4.31957	0.113184	0.480427	0.288054	82.5563
1	1173.5	71.5738	4.16754	0.11455	0.47438	0.290947	68.0479
1	1128.5	40.3526	4.47085	0.110158	0.490461	0.289563	57.2834
1	1309	50.4568	3.98048	0.127777	0.508017	0.317971	60.6567
1	1514.5	16.7668	3.84258	0.147837	0.568086	0.317506	85.8974
1	1301	48.0028	4.03922	0.126996	0.511573	0.295077	83.6906
1	1109.5	18.6072	4.06574	0.108303	0.439738	0.307866	76.9828
1	1449	29.2298	4.02488	0.141443	0.568297	0.311958	70.4547
1	1273.5	26.3714	4.04211	0.124312	0.486302	0.317371	51.2054
1	1364.5	15.9887	3.69638	0.133195	0.485038	0.334333	74.8598
1	1442.5	13.5111	3.46676	0.140809	0.491038	0.355218	58.7414
1	1128	20.7227	4.43981	0.110109	0.490603	0.262632	76.5688
1	1429.5	22.6317	3.63293	0.13954	0.506642	0.338297	74.2057
1	1514	29.982	3.7299	0.147788	0.553054	0.337953	78.0891
1	1577.5	24.1591	3.66501	0.153987	0.564464	0.33733	83.0054
1	1205.5	15.8285	4.07062	0.117674	0.477718	0.307783	74.1475
1	1317	17.7481	3.76785	0.128558	0.48639	0.335334	83.3245
1	1150	14.3465	3.92839	0.112257	0.440966	0.318839	77.7248
1	1401	43.5162	4.05392	0.136758	0.543537	0.324176	59.9249
1	1036.5	37.4391	4.65282	0.101177	0.468307	0.266303	64.8116
1	1385.5	23.4498	4.01329	0.135245	0.541411	0.297763	74.5493
1	1525	61.462	3.7676	0.148862	0.558935	0.308238	77.9878
1	1007.5	38.2858	4.78087	0.0983465	0.46214	0.270389	77.9963
1	1359.5	17.3765	3.98941	0.132707	0.525111	0.303524	84.4183
1	1080	20.5375	4.21016	0.105424	0.443068	0.285072	75.9483
1	1141	34.0023	4.26082	0.111378	0.47214	0.286471	74.0347
1	927	25.831	4.79775	0.0904885	0.434892	0.243797	87.0087
1	952	15.0536	4.32302	0.0929289	0.398766	0.28225	80.6033
1	1183	25.1055	3.998	0.115478	0.46361	0.324527	68.7873
1	1676.5	28.5825	3.54824	0.163651	0.579238	0.333154	73.978
1	1568	16.181	3.59983	0.153059	0.5479	0.326956	75.0365
1	1298.5	36.9442	3.91852	0.126752	0.486002	0.311293	73.4498
1	1223.5	24.3997	4.2895	0.119431	0.489017	0.297227	79.3069
1	1354	21.4803	3.8208	0.13217	0.502712	0.302892	76.546
1	1357.5	37.8908	3.90044	0.132512	0.516399	0.321439	61.9675
1	1797	38.4825	3.47014	0.175413	0.60671	0.334384	84.925
1	1384	38.9505	3.8771	0.135098	0.524817	0.315723	78.3442
1	1264.5	12.0113	3.80514	0.123433	0.47024	0.324886	75.804
1	1279	13.8539	3.81578	0.124849	0.470772	0.307846	70.3757
1	1041.5	60.0972	5.18146	0.101665	0.498406	0.260509	79.2836
1	1305	25.0933	4.22587	0.127387	0.529596	0.284557	85.6069
1	1660.5	74.2278	3.7535	0.162089	0.609678	0.313035	85.6835
1	1529.5	31.0271	3.39943	0.149301	0.506436	0.372865	71.772
1	1388.5	53.68	3.81415	0.135538	0.502719	0.318558	61.7159
1	1645	25.8963	3.50577	0.160576	0.562639	0.319237	82.993
1	1070	15.6743	4.20096	0.104447	0.439749	0.299209	80.0702
1	1265	60.441	4.30351	0.123482	0.523296	0.284365	78.5
1	1259	40.0052	3.99326	0.122897	0.489618	0.290821	73.6038
1	1066	30.2036	4.17982	0.104057	0.437225	0.296526	77.1643
1	1250.5	25.0567	4.14545	0.122067	0.50433	0.290517	87.7373
1	1086.5	12.3325	4.43314	0.106058	0.468995	0.288341	79.6059
1	1682.5	13.444	3.43166	0.164236	0.563621	0.324466	85.7146
1	911	20.5324	5.09288	0.0889267	0.451471	0.259444	62.3454
1	1213	15.2702	4.08911	0.118406	0.484208	0.306711	88.9224
1	1196	39.8683	3.9747	0.116747	0.465965	0.306519	71.4918
1	1053.5	14.1358	4.57888	0.102837	0.470327	0.27156	80.3415
1	1095	28.5091	4.70948	0.106888	0.505673	0.279248	83.6016
1	1192	56.1222	4.29822	0.116356	0.500147	0.25935	74.1957
1	1188	58.388	4.29179	0.115966	0.497778	0.261447	75.7341
1	1184	56.0178	4.31113	0.115575	0.498334	0.258134	78.5036
1	1192.5	44.2547	4.29622	0.116405	0.500147	0.257817	70.3735
1	1185.5	60.9564	4.28967	0.115722	0.496475	0.261202	72.3044
1	1178.5	42.5836	4.28236	0.115039	0.49245	0.255104	82.8325
1	1252	8.7932	3.99642	0.122213	0.483702	0.29336	79.8168
1	1283.5	21.3391	4.21552	0.125288	0.528273	0.280658	79.2774
1	1353	12.3421	4.31766	0.132072	0.569497	0.301253	79.5183
1	1707	22.8996	3.47101	0.166628	0.57247	0.367223	76.3079
1	956	64.0207	4.77255	0.0933194	0.44148	0.265734	67.7061
1	1431	50.9047	3.61557	0.139686	0.503849	0.349183	72.1183
1	1189	81.4955	4.42129	0.116064	0.511385	0.282812	72.3228
1	1546	19.0556	3.88492	0.150912	0.583659	0.316426	86.8186
1	1206.5	8.04828	4.61756	0.117772	0.543526	0.270574	86.8673
1	1167.5	7.18195	4.13513	0.113965	0.471004	0.29027	74.8344
1	1185	7.46419	4.69596	0.115673	0.542079	0.266907	85.4108
1	1131	16.6695	4.24031	0.110402	0.470566	0.28851	73.1281
1	1188.5	25.6398	4.07802	0.116015	0.473675	0.323653	62.7794
1	1154	15.0718	4.49684	0.112647	0.507812	0.290576	71.9425
1	1612	17.7912	3.76229	0.157354	0.584554	0.311634	85.7383
1	882.5	33.8945	5.51322	0.0861447	0.472501	0.237651	84.8286
1	809.5	26.878	5.15619	0.0790189	0.406781	0.257883	83.987
1	1275	49.6205	3.90547	0.124458	0.482455	0.320221	79.13
1	995	11.1962	4.50727	0.0971263	0.436669	0.279536	88.1542
1	1161.5	39.7587	4.05807	0.113379	0.459909	0.305607	83.6974
1	1205	11.0705	4.28122	0.117625	0.493734	0.281519	87.6894
1	1085.5	33.6345	4.17456	0.10596	0.442851	0.285694	69.8556
1	1470.5	41.1399	3.92226	0.143542	0.563132	0.327923	86.7233
1	1251.5	20.8465	4.01244	0.122164	0.486531	0.330537	60.2183
1	1086	43.4735	4.30962	0.106009	0.457548	0.291704	71.3633
1	1401	24.4395	4.16873	0.136758	0.569487	0.308397	76.7833
1	1177	64.1372	4.50976	0.114892	0.519246	0.299145	74.0499
1	1350.5	28.0273	4.20937	0.131828	0.554731	0.293819	77.4839
1	1657	42.3029	3.48988	0.161747	0.564801	0.320339	77.8557
1	1143	19.6405	4.43437	0.111573	0.491062	0.267355	81.0216
1	1505	14.2558	3.75525	0.14691	0.548482	0.307079	83.5027
1	1150.5	32.3688	4.26431	0.112305	0.461718	0.2918	59.2719
1	1333	13.3856	3.98256	0.13012	0.532692	0.31009	85.3044
1	1069.5	18.1333	4.49049	0.104399	0.469266	0.280161	79.9694
1	1373.5	9.85041	3.88696	0.134073	0.519722	0.306704	81.5201
1	1557	35.2805	3.73986	0.151986	0.571611	0.325499	78.8978
1	1387	57.5093	3.89083	0.135391	0.527219	0.304017	75.9005
1	1249.5	61.8059	4.46606	0.121969	0.54173	0.259356	69.6138
1	1286.5	11.1232	3.81229	0.125581	0.477535	0.298633	79.4835
1	1415	59.9259	3.70058	0.138124	0.503711	0.348819	83.527
1	1498.5	14.9686	3.71448	0.146275	0.543228	0.304758	87.6431
1	1134	34.9934	4.16061	0.110695	0.460596	0.300753	65.0184
1	1394	17.8307	3.77448	0.136074	0.513626	0.311302	79.5332
1	1519	30.4747	3.66776	0.148276	0.543846	0.295751	75.8448
1	1014	35.9	4.65481	0.098981	0.458646	0.265988	88.2276
1	1589	26.0948	3.71393	0.155109	0.575212	0.314214	85.4394
1	1026	37.0011	4.47109	0.100152	0.444577	0.287472	45.4499
1	1491	29.8521	3.75995	0.145543	0.545569	0.316301	80.9514
1	1308	10.3292	3.85797	0.12768	0.491503	0.327121	73.5873
1	1622.5	17.3171	3.60319	0.158379	0.571654	0.321969	83.3007
1	1408.5	15.6917	3.70607	0.13749	0.509428	0.31302	74.5162
1	1297	24.9746	4.07988	0.126606	0.515493	0.308166	69.5617
1	1341	25.3986	3.88349	0.130901	0.507739	0.314121	72.0871
1	1208.5	19.1998	4.03696	0.117967	0.473679	0.297357	80.7024
1	1363.5	29.0551	3.9594	0.133097	0.51876	0.323657	85.6553
1	1550	15.7494	3.85185	0.151302	0.575346	0.333674	82.5465
1	1108.5	16.4097	4.18031	0.108206	0.450885	0.288564	83.2306
1	1202.5	24.8606	4.07824	0.117381	0.484374	0.296102	58.192
1	1079.5	37.6705	4.74495	0.105375	0.494204	0.269096	66.7574
1	1554.5	14.8558	3.718	0.151742	0.550074	0.351407	78.3735
1	1189.5	28.1565	4.37002	0.116112	0.506158	0.285571	76.6632
1	1562	23.7224	3.90172	0.152474	0.589445	0.323388	80.0421
1	1136.5	37.8143	4.64965	0.110939	0.512683	0.260256	81.9358
1	1544.5	40.9356	3.59224	0.150765	0.541197	0.325077	76.5632
1	1442.5	13.7302	3.80899	0.140809	0.5317	0.311293	83.7198
1	700.5	31.1127	5.86522	0.0683789	0.397453	0.221363	64.5899
1	941	34.2133	4.84501	0.0918551	0.440125	0.277197	70.5497
1	1688	31.8629	3.71025	0.164773	0.59813	0.330473	80.3517
1	1095.5	16.9796	4.03665	0.106937	0.4332	0.307712	68.7552
1	1180	15.4307	4.21674	0.115185	0.476322	0.299968	77.8222
1	1700.5	58.9691	3.41347	0.165993	0.564272	0.328642	78.6975
1	1126.5	14.2369	4.14494	0.109963	0.462366	0.301757	41.9898
1	704	6.40972	5.3848	0.0687205	0.370595	0.231001	66.4203
1	1225	21.8842	3.95942	0.119578	0.473485	0.30123	83.9142
1	1504	17.0439	3.77778	0.146812	0.554216	0.304917	83.6858
1	1188	18.2288	3.95419	0.115966	0.455922	0.29146	75.9858
1	1578.5	39.4527	3.84424	0.154084	0.588554	0.31854	81.443
1	1119.5	57.8756	4.59124	0.109279	0.502199	0.289495	80.1711
1	1418.5	44.0966	3.87212	0.138466	0.535888	0.309325	66.7153
1	1054.5	24.7985	4.7672	0.102934	0.493363	0.249977	87.6771
1	1619.5	49.657	3.94315	0.158087	0.622617	0.308896	84.9514
1	1173.5	18.3154	4.07499	0.114551	0.465232	0.291613	78.4332
1	1087	12.6777	4.10218	0.106107	0.433905	0.296154	76.7549
1	1272	32.0159	3.90258	0.124166	0.486847	0.318736	79.8052
1	1356.5	27.6868	4.03714	0.132414	0.530807	0.315127	85.4351
1	960.5	48.1848	4.99956	0.0937586	0.469244	0.26655	67.7281
1	1370.5	28.4946	3.76332	0.133781	0.498917	0.329044	77.0405
1	1409	12.1166	3.7702	0.137539	0.515646	0.3217	74.914
1	1583.5	45.7368	3.71637	0.154572	0.573274	0.325002	84.6702
1	1371.5	42.0701	3.92229	0.133878	0.517816	0.307935	74.7881
1	1532.5	17.1162	3.88238	0.149594	0.58078	0.296811	87.5998
1	1450.5	17.8052	3.80423	0.14159	0.534119	0.301265	85.2929
1	1761.5	16.3448	3.5949	0.171948	0.614163	0.335439	86.5994
1	1150	21.7838	4.19805	0.112257	0.463321	0.282184	69.2246
1	1349	53.7965	4.42375	0.131682	0.557749	0.267008	77.9569
1	847.5	6.18641	4.58807	0.0827282	0.380296	0.262235	83.721
1	1483.5	28.4779	3.69249	0.144811	0.529146	0.295135	75.46
1	1388	80.686	4.27679	0.135489	0.57939	0.254947	77.8049
1	943	35.0969	4.3912	0.0920504	0.406483	0.272716	44.1017
1	1128.5	22.2152	4.33658	0.110158	0.477199	0.290716	82.3342
1	1304.5	41.4451	4.17668	0.127338	0.528967	0.309325	71.5983
1	1039	47.9651	4.43399	0.101421	0.445469	0.272463	77.8489
1	1186	42.6976	4.38657	0.115771	0.506969	0.286574	69.43
1	1649.5	37.5632	3.50578	0.161015	0.556841	0.325014	75.8286
1	1178.5	12.3064	4.07529	0.115039	0.468926	0.28759	69.2778
1	1125.5	8.98997	4.15744	0.109865	0.455524	0.289296	82.8266
1	909.5	14.2444	4.5648	0.0887803	0.40601	0.279159	71.2527
1	1191.5	11.9196	4.18729	0.116308	0.476688	0.297431	78.9907
1	1321	30.0591	4.10084	0.128949	0.528959	0.316305	86.8735
1	1183.5	16.9017	4.51541	0.115527	0.521665	0.282349	82.8623
1	1191.5	34.3416	4.11708	0.116308	0.478457	0.282418	64.0308
1	1051	38.0622	4.60136	0.102593	0.465693	0.303948	68.4111
1	1647.5	15.7762	3.65839	0.16082	0.588065	0.323958	81.763
1	1205	40.0303	4.03852	0.117625	0.475115	0.309099	74.1762
1	1078	14.9338	4.13896	0.105228	0.435325	0.265074	82.7901
1	1298	34.804	4.28206	0.126703	0.540519	0.296314	74.2603
1	1198.5	8.86197	4.19142	0.116991	0.490852	0.299292	86.8406
1	1243.5	36.6746	4.43417	0.121384	0.532638	0.308	63.843
1	1291.5	14.2886	4.20143	0.126069	0.526908	0.300574	79.705
1	1268	30.385	4.30165	0.123775	0.535564	0.31966	78.8565
1	1324.5	24.5932	4.04359	0.12929	0.522942	0.321775	79.4316
1	1380	19.9452	3.95426	0.134708	0.53159	0.301658	77.5205
1	1041.5	16.4987	4.42205	0.101665	0.445118	0.288054	87.8139
1	1799	27.9058	3.84156	0.175608	0.65627	0.31616	86.7163
1	1235	19.0481	3.80563	0.120554	0.458805	0.30227	86.3647
1	1632	21.2243	3.80459	0.159307	0.602348	0.316426	84.3978
1	1359.5	12.7717	3.91085	0.132707	0.517045	0.299049	85.2123
1	1273	42.4414	4.32966	0.124263	0.53791	0.283728	84.1385
1	1356.5	34.2072	3.87122	0.132414	0.509636	0.304805	75.541
1	1346	47.6082	3.88057	0.131389	0.50259	0.308609	72.3024
1	1375.5	57.6842	4.34067	0.134269	0.580578	0.263382	80.1594
1	1315.5	33.7852	4.04471	0.128412	0.505076	0.317592	65.7121
1	1289.5	49.4352	3.89909	0.125874	0.490245	0.308529	67.5325
1	1216.5	22.6923	4.3281	0.118748	0.513905	0.269727	85.0354
1	1762.5	14.8828	3.49046	0.172045	0.598387	0.336588	87.3459
1	1110.5	62.1472	4.51928	0.108401	0.488274	0.236662	69.1456
1	1318.5	47.9777	4.13749	0.128705	0.528934	0.306125	73.796
1	1221.5	26.2947	4.34524	0.119236	0.512888	0.29894	75.9358
1	1411.5	46.5817	3.87934	0.137783	0.531752	0.319385	79.7395
1	903.5	52.8385	4.91213	0.0881946	0.43382	0.255747	70.3773
1	1307	25.6642	3.9384	0.127582	0.503918	0.315386	69.1373
1	986.5	47.2951	4.71544	0.0962966	0.459831	0.228538	71.5816
1	1024.5	31.0368	4.59764	0.100006	0.458901	0.274474	69.2761
1	977.5	36.1429	5.05167	0.0954181	0.484547	0.23156	83.221
1	1241	41.3044	3.7866	0.121139	0.451604	0.338105	88.0177
1	1509	24.8322	3.80375	0.1473	0.543731	0.316683	87.0375
1	1192	41.3366	4.37013	0.116356	0.515492	0.286636	74.633
1	1620.5	23.4578	3.4752	0.158184	0.549042	0.32653	77.3035
1	1006	14.459	4.63571	0.0982001	0.455447	0.291002	77.9387
1	1273	13.184	4.15074	0.124263	0.514271	0.310469	71.769
1	1187	19.5926	4.43916	0.115868	0.511023	0.283006	84.7105
1	1327	13.1606	4.21185	0.129534	0.545001	0.312539	80.2673
1	906.5	15.2428	4.67571	0.0884875	0.409079	0.26118	61.1133
1	929	9.36149	4.71415	0.0906838	0.427098	0.269811	70.5978
1	1590	61.1076	3.66948	0.155207	0.568399	0.338166	72.9281
1	1241	12.4417	4.27944	0.121139	0.516421	0.303591	81.951
1	1325.5	29.382	3.85207	0.129388	0.4984	0.346557	69.9187
1	1616	47.7442	3.84681	0.157745	0.60129	0.310578	73.9048
1	1053.5	19.5806	4.49474	0.102837	0.458702	0.296195	57.7026
1	1177	13.3797	4.43059	0.114892	0.509965	0.27353	73.0865
1	1491	15.993	3.86242	0.145543	0.553306	0.314446	86.5131
1	1483	19.592	3.85527	0.144762	0.538022	0.333508	81.6119
1	1095	18.3654	4.52765	0.106888	0.472851	0.290104	58.4321
1	1496.5	17.0506	3.80729	0.14608	0.556396	0.330508	82.5285
1	1115	26.1633	4.42609	0.10884	0.481739	0.291613	78.1939
1	1322	47.0198	4.31539	0.129046	0.549983	0.290845	83.5886
1	1162	15.919	4.27952	0.113428	0.482296	0.289956	61.6922
1	1362	31.1233	4.00556	0.132951	0.534892	0.319047	74.6501
1	1323	42.5254	3.94442	0.129144	0.500665	0.325559	61.1675
1	1138	14.695	4.30992	0.111085	0.478085	0.282	81.6231
1	960	14.8625	4.4855	0.0937098	0.419995	0.258959	81.4134
1	1135.5	29.0607	5.08878	0.110841	0.561019	0.247032	80.1315
1	1599.5	38.1392	3.5409	0.156134	0.550572	0.323208	77.2363
1	1482.5	34.857	3.70116	0.144713	0.52997	0.313026	60.3824
1	1350	45.1779	3.72207	0.131779	0.492731	0.354376	64.5018
1	1411.5	15.607	3.78671	0.137783	0.521367	0.319629	86.931
1	935	37.0423	5.0792	0.0912695	0.463789	0.234513	72.5296
1	1510	78.0949	3.97533	0.147398	0.592409	0.290467	78.5241
1	936	14.0263	4.73041	0.0913671	0.430946	0.266759	72.0451
1	1599.5	52.3659	3.80534	0.156134	0.589414	0.306201	81.9515
1	1234	69.3317	4.8357	0.120456	0.573089	0.250436	75.9143
1	902.5	23.9214	5.27038	0.088097	0.463465	0.239283	70.8727
1	1222	14.7633	3.88761	0.119285	0.465676	0.311935	60.4819
1	1076	62.0186	4.80264	0.105033	0.505776	0.270119	69.4987
1	1294.5	25.8358	3.9477	0.126362	0.499646	0.319357	87.7693
1	1364.5	35.7293	3.99344	0.133195	0.534286	0.325677	73.4443
1	1505	24.1063	3.95452	0.14691	0.572696	0.308873	89.0646
1	985	21.721	5.13829	0.0961502	0.492194	0.236662	81.0632
1	1024.5	43.4417	4.86267	0.100006	0.47854	0.260446	72.8159
1	1258.5	17.2658	3.78282	0.122848	0.464559	0.300256	78.6085
1	952.5	27.103	5.16716	0.0929777	0.486189	0.247719	83.7306
1	982.5	21.451	5.16995	0.0959061	0.496799	0.240168	85.2309
1	1268	10.4364	3.76592	0.123775	0.463727	0.316353	71.6978
1	1046.5	50.5446	4.83099	0.102153	0.493531	0.236544	81.4569
1	1011	7.21371	4.83177	0.0986882	0.476905	0.26102	67.7064
1	1465.5	27.1685	3.76221	0.143054	0.540221	0.316875	84.7282
1	1092	50.9978	4.54398	0.106595	0.493862	0.25336	56.3343
1	1308.5	28.3387	4.09894	0.127728	0.520879	0.288955	76.432
1	1220.5	57.6995	4.35063	0.119138	0.516714	0.296957	74.5175
1	1481	10.9201	3.57907	0.144567	0.517158	0.325246	80.4518
1	992	26.7687	4.47802	0.0968335	0.432239	0.239673	73.0293
1	976.5	18.7934	4.92333	0.0953205	0.469014	0.262683	80.4969
1	1060.5	19.8661	4.70843	0.10352	0.483882	0.28139	70.7982
1	1388.5	20.5725	3.94129	0.135538	0.534252	0.305931	73.5634
1	1413.5	44.3912	3.7203	0.137978	0.506812	0.331045	72.6719
1	1320.5	45.7027	3.85715	0.1289	0.494257	0.314304	84.3841
1	1079.5	32.0255	4.7931	0.105375	0.500166	0.265532	87.5526
1	1117	14.5009	4.53757	0.109035	0.494282	0.285812	72.5958
1	1410.5	7.44142	3.69842	0.137685	0.50665	0.33917	79.1571
1	1513	19.2569	4.35428	0.147691	0.641956	0.300523	80.3779
1	729	14.2503	5.26377	0.0711609	0.377726	0.250124	76.3885
1	896.5	36.6537	5.47165	0.0875113	0.472938	0.248876	74.1623
1	1435	31.0757	3.9799	0.140077	0.554229	0.29763	79.752
1	1248.5	26.3232	4.15233	0.121872	0.506052	0.300216	87.7377
1	906	18.4613	4.65924	0.0884386	0.411759	0.277546	52.562
1	1260	26.9627	3.80037	0.122994	0.469328	0.341795	60.8974
1	1201	35.8428	4.05794	0.117235	0.469732	0.309464	58.2875
1	1246.5	29.1201	4.27508	0.121676	0.518043	0.313095	67.6839
1	1175.5	22.4964	4.73094	0.114746	0.541523	0.277105	79.6036
1	1237.5	24.1822	3.79358	0.120798	0.463362	0.315076	83.9797
1	1466	44.8483	3.78275	0.143103	0.54392	0.330665	81.9258
1	1388	26.93	3.93986	0.135489	0.534164	0.287445	85.6627
1	1451.5	32.6817	4.09482	0.141687	0.576555	0.295837	81.5805
1	606.5	24.0171	6.8055	0.0592031	0.373486	0.19287	86.154
1	972	55.3664	4.91634	0.0948812	0.465649	0.231792	71.8588
1	1573.5	29.899	3.54485	0.153596	0.54307	0.316315	81.0437
1	1032	36.296	4.55826	0.100738	0.457478	0.297919	69.349
1	1082.5	40.7863	3.85788	0.105668	0.408203	0.330935	69.3448
1	1250	19.6584	4.3109	0.122018	0.524822	0.288424	76.9729
1	1520.5	28.859	3.76034	0.148423	0.55706	0.308664	78.6148
1	1321	45.3486	3.86991	0.128949	0.499041	0.275225	77.7494
1	1187	18.1013	4.19275	0.115868	0.48346	0.292155	77.4887
1	1030	51.121	4.7608	0.100543	0.478397	0.247847	64.9667
1	891	41.2877	5.53331	0.0869744	0.478586	0.236188	84.8556
1	1294	29.1816	3.92763	0.126313	0.483022	0.320464	60.4041
1	866.5	66.8357	5.89169	0.0845829	0.48362	0.197083	51.667
1	923.5	16.0176	5.37055	0.0901469	0.482852	0.239345	71.6081
1	891	10.72	5.13974	0.0869744	0.446822	0.218904	83.6178
1	761	37.8689	6.77106	0.0742846	0.469185	0.178579	73.0553
1	1153.5	19.509	4.23601	0.112598	0.47464	0.294735	47.1839
1	1028	18.551	5.15743	0.100348	0.51586	0.257011	76.3346
1	966.5	8.23666	4.6317	0.0943443	0.433181	0.247365	84.9833
1	784.5	12.9877	5.70005	0.0765785	0.439412	0.259309	74.3692
1	1436	30.9164	3.71987	0.140174	0.516242	0.310485	78.4441
1	1058	15.8904	5.07932	0.103276	0.529773	0.274444	80.1462
1	1428	16.9003	3.75027	0.139393	0.524076	0.33904	80.9461
1	1071.5	34.7314	4.52972	0.104594	0.474369	0.279672	75.2767
1	962	24.6067	5.0967	0.0939051	0.482653	0.271415	84.9059
1	1542	33.876	3.96127	0.150521	0.592904	0.318376	83.7665
1	842.5	31.9044	4.89206	0.0822401	0.402675	0.263433	58.4725
1	924.5	33.5816	5.23708	0.0902445	0.471046	0.233023	82.8298
1	1112.5	16.8072	4.31873	0.108596	0.46557	0.290376	68.8977
1	1351	21.3409	3.9322	0.131877	0.516838	0.332262	75.0889
1	1517.5	43.908	3.79589	0.14813	0.562824	0.325499	72.7046
1	1046	30.5894	4.7961	0.102105	0.487236	0.272573	65.248
1	1250	18.0623	3.97272	0.122018	0.480391	0.316231	68.6472
1	1125	24.6913	4.3955	0.109816	0.483002	0.302844	69.0415
1	1050	24.2253	4.63075	0.102495	0.472132	0.263178	74.9513
1	1206.5	25.6919	4.14945	0.117772	0.477699	0.305863	69.0148
1	1082.5	13.7697	4.26199	0.105668	0.447389	0.297832	67.2986
1	1230	55.273	4.03993	0.120066	0.485546	0.311601	59.7118
1	1153.5	29.7159	4.58495	0.112598	0.512376	0.259712	78.7421
1	1164	14.6559	4.23649	0.113623	0.482558	0.302819	82.9314
1	931.5	14.9904	4.91965	0.0909278	0.444275	0.259132	65.9233
1	902	51.4843	5.33972	0.0880482	0.466313	0.240813	87.0612
1	1530	37.2391	3.5969	0.14935	0.537202	0.311582	79.0566
1	837	22.6612	4.95152	0.0817033	0.403465	0.228945	84.8677
1	1115	28.1383	4.09716	0.10884	0.444881	0.283867	79.4063
1	664.5	17.4398	5.82539	0.0648648	0.378169	0.203037	74.1984
1	1034.5	13.789	4.45821	0.100982	0.437512	0.273043	67.2321
1	1277.5	41.8985	3.83391	0.124702	0.466163	0.325643	67.271
1	1581.5	19.7962	3.50965	0.154377	0.541781	0.322061	76.7817
1	839	42.9763	5.38615	0.0818985	0.434941	0.223929	69.9847
1	1054.5	32.2116	5.07591	0.102934	0.522108	0.262689	79.2823
1	1068	8.46677	4.24731	0.104252	0.443214	0.293504	81.6504
1	1267	28.3662	4.1455	0.123677	0.510955	0.309661	84.4231
1	1404.5	12.2584	3.77882	0.137099	0.512486	0.297911	80.5744
1	964.5	65.5201	5.49734	0.0941491	0.519572	0.238134	62.8495
1	1099	10.8106	4.47558	0.107278	0.476593	0.298775	73.7092
1	736.5	16.2447	6.67084	0.071893	0.479612	0.204516	77.4536
1	1173.5	38.3803	4.314	0.11455	0.493739	0.312657	59.6292
1	1227.5	48.6189	4.01411	0.119822	0.48111	0.317141	70.1387
1	689	37.0879	5.60542	0.0672563	0.375271	0.211034	75.8793
1	876	10.6216	4.93449	0.0855102	0.421608	0.265945	80.9298
1	1192	72.3151	4.75286	0.116356	0.553492	0.252714	75.3575
1	607.5	35.2755	5.7359	0.0593007	0.339034	0.221546	56.1082
1	1123	20.588	4.43952	0.109621	0.476818	0.270966	84.0457
1	755	21.3214	5.9349	0.0736989	0.439746	0.214706	78.4621
1	1229.5	47.4144	4.76024	0.120017	0.564538	0.252817	71.703
1	1293.5	19.6537	4.07402	0.126264	0.514339	0.293084	82.3645
1	1018	29.3551	5.32027	0.0993715	0.528805	0.227767	82.9095
1	979.5	33.1236	4.57928	0.0956133	0.434481	0.277051	57.719
1	229.5	25.9415	15.746	0.0224025	0.347069	0.108885	80.7825
1	1141.5	36.6559	3.94099	0.111427	0.435966	0.317017	84.149

## Sheet: pif4_ hAT_A
Predicate	Pixel count	SSE	LS Ratio	Surface	Length	Width	Axes angle
1	1247	34.3109	4.39549	0.121725	0.530792	0.27297	79.6233
1	1116	61.0013	4.70415	0.108938	0.498881	0.280397	71.4704
1	1057	34.0311	4.34331	0.103178	0.447625	0.304683	54.6847
1	1222	17.3209	4.25501	0.119285	0.508227	0.300335	83.0317
1	913	19.1366	5.03282	0.0891219	0.449408	0.245773	75.6523
1	1174	23.2935	4.36321	0.114599	0.497462	0.272407	68.8632
1	1371	23.0123	4.03022	0.133829	0.539658	0.301784	86.9582
1	909	14.6744	4.93062	0.0887315	0.438237	0.255486	68.0894
1	980	46.1311	5.35881	0.0956621	0.508695	0.330439	80.1806
1	1173	13.2334	4.11369	0.114502	0.471028	0.31556	84.7703
1	1095.5	13.1079	4.55689	0.106937	0.484246	0.287283	72.2293
1	1114.5	10.5821	3.99997	0.108791	0.432297	0.301692	52.109
1	1044.5	14.3421	4.74036	0.101958	0.483311	0.275233	65.6343
1	1602	37.4495	3.76313	0.156378	0.580612	0.332358	79.6945
1	1166	25.7937	4.10997	0.113818	0.466391	0.301417	69.7991
1	1486	53.5234	3.70352	0.145055	0.535195	0.329818	82.0376
1	1418.5	32.9984	3.57374	0.138466	0.488032	0.344379	68.2658
1	1074	23.3847	4.07535	0.104838	0.424145	0.322938	67.0989
1	1302	11.2427	4.00935	0.127094	0.50651	0.311491	75.7565
1	880.5	12.1054	5.2439	0.0859495	0.44909	0.247955	83.9384
1	900	35.4697	4.93017	0.087853	0.436192	0.24942	82.0934
1	1165.5	20.2379	4.1224	0.11377	0.467702	0.284614	81.4465
1	1180	31.7212	4.09581	0.115185	0.470514	0.288215	70.0269
1	804.5	13.7782	5.95454	0.0785308	0.46826	0.242962	87.3887
1	1184	37.8683	4.24568	0.115575	0.486979	0.292998	78.9692
1	1428	85.9179	4.00158	0.139393	0.55468	0.318869	79.3914
1	1172.5	16.8557	4.16411	0.114453	0.476698	0.299817	85.6684
1	1403	36.7376	3.77053	0.136953	0.51453	0.339291	85.7416
1	1031	25.32	4.37362	0.10064	0.438473	0.276194	59.509
1	937.5	10.0339	5.22005	0.0915135	0.476595	0.237416	81.4582
1	1236	46.1225	4.2386	0.120651	0.509895	0.284918	86.0248
1	1165.5	47.7972	4.39393	0.11377	0.499935	0.293789	57.4692
1	1198	50.4554	4.20162	0.116942	0.487285	0.295941	79.2113
1	1401.5	20.5868	4.09043	0.136807	0.559801	0.316698	73.7947
1	1388.5	13.8314	4.20642	0.135538	0.563103	0.320763	77.9108
1	1009.5	29.2447	4.80266	0.0985417	0.472912	0.292324	54.2299
1	1069.5	52.7604	5.13443	0.104399	0.536486	0.255491	85.1156
1	1121.5	47.4285	4.32268	0.109475	0.473672	0.300149	68.2308
1	1030	23.3579	4.27753	0.100543	0.427503	0.279641	77.2658
1	1378	25.0679	4.05471	0.134513	0.542635	0.295316	84.6622
1	1123.5	26.0048	4.47989	0.10967	0.491161	0.281038	80.9013
1	1295.5	28.4247	3.95561	0.126459	0.493779	0.323685	67.9737
1	1448.5	17.8123	3.66758	0.141394	0.518374	0.336065	78.4971
1	1135.5	43.9468	4.61521	0.110841	0.510927	0.302276	62.3989
1	1254	34.3091	4.15387	0.122408	0.508264	0.312732	75.8117
1	1156.5	35.6097	4.94159	0.112891	0.555054	0.293845	78.6639
1	881.5	24.061	5.03277	0.0860471	0.43301	0.254408	70.6222
1	903	12.4804	4.38647	0.0881458	0.385845	0.305078	42.0714
1	1159	54.4792	4.13519	0.113135	0.464468	0.294387	84.1869
1	1410.5	44.5236	4.24842	0.137685	0.580444	0.286759	78.118
1	1599.5	17.8523	3.86068	0.156134	0.602374	0.319002	76.3573
1	827.5	12.3945	4.5047	0.0807759	0.361379	0.281945	86.6239
1	1366	16.9406	3.69982	0.133341	0.493666	0.338587	76.8939
1	1136	33.4214	4.16598	0.11089	0.458016	0.316442	57.8713
1	1015	11.6058	4.6422	0.0990786	0.457959	0.263898	82.1734
1	1248	48.3802	4.20261	0.121823	0.510667	0.282132	73.351
1	1244.5	36.543	4.04524	0.121481	0.491332	0.274056	77.3863
1	1362	56.5808	3.99622	0.132951	0.531136	0.30944	82.3221
1	1296	32.7299	4.21957	0.126508	0.533036	0.302057	83.8336
1	1183.5	48.8634	4.70107	0.115527	0.538325	0.324562	39.5484
1	1097.5	45.7066	4.39452	0.107132	0.474324	0.301449	52.4974
1	1111	36.5305	4.56181	0.10845	0.495742	0.277359	82.3773
1	1022	21.1874	4.77882	0.0997619	0.467242	0.268874	78.4449
1	1052.5	25.6774	4.41656	0.102739	0.452545	0.3099	74.5499
1	1295.5	17.5825	4.09455	0.126459	0.518058	0.310173	75.4783
1	616.5	15.7618	6.81555	0.0601793	0.413696	0.206379	68.612
1	1035	35.5968	4.47305	0.101031	0.450376	0.294236	73.8875
1	944	32.0691	4.6492	0.092148	0.422434	0.266882	62.582
1	1042	30.7062	4.45471	0.101714	0.452771	0.295239	84.1804
1	1495	35.4873	3.90007	0.145934	0.56915	0.321418	81.8687
1	1398.5	11.3795	3.9644	0.136514	0.539125	0.331886	77.975
1	1058	52.9675	4.39674	0.103276	0.455044	0.257275	66.4671
1	1391.5	60.8006	3.87974	0.13583	0.524567	0.304555	79.3714
1	945.5	27.2513	4.89847	0.0922944	0.452997	0.275045	70.8955
1	1262	18.1362	3.72179	0.123189	0.453885	0.327296	73.0041
1	1489	26.9824	3.82654	0.145348	0.556311	0.336687	75.0342
1	1282.5	45.0382	4.23589	0.12519	0.52683	0.297946	83.5682
1	931.5	15.9973	4.99345	0.0909278	0.456311	0.248435	80.5474
1	851.5	30.9529	4.78223	0.0831187	0.390476	0.288429	64.0066
1	1177	31.3598	4.41069	0.114892	0.505818	0.301751	72.3212
1	1096	18.639	4.38748	0.106985	0.467043	0.298902	74.2514
1	913.5	24.8845	4.90336	0.0891708	0.438279	0.266759	70.0321
1	968.5	8.31422	4.71088	0.0945395	0.445088	0.262061	75.8569
1	782	34.1887	5.7742	0.0763345	0.434946	0.264787	74.4903
1	1188.5	32.5625	4.40588	0.116015	0.511788	0.310861	49.4266
1	1029	38.7543	4.70249	0.100445	0.46922	0.294236	63.264
1	1226.5	40.7232	4.12248	0.119724	0.49135	0.309393	73.7091
1	1234	48.3993	3.95874	0.120456	0.475171	0.306691	86.3086
1	1398	17.8274	3.87033	0.136465	0.525224	0.316459	87.1236
1	1053.5	20.7705	4.73561	0.102837	0.4856	0.273104	84.2533
1	727	13.9886	6.39638	0.0709657	0.45858	0.227659	75.8017
1	927.5	33.1926	4.79588	0.0905374	0.431908	0.29065	57.499
1	1420	21.7882	3.90763	0.138612	0.538678	0.306365	86.1901
1	1336.5	41.1605	4.1466	0.130462	0.534474	0.299849	83.5027
1	1149	35.0456	4.82267	0.112159	0.536255	0.2946	75.52
1	957	35.1439	4.97975	0.093417	0.465437	0.248535	83.4377
1	1345.5	14.4529	4.01309	0.13134	0.52702	0.324081	73.5159
1	955	22.2068	4.7841	0.0932218	0.450079	0.291791	65.1179
1	1211	55.0818	4.05465	0.118211	0.479016	0.296828	62.8757
1	1128.5	33.1181	4.64433	0.110158	0.493949	0.289528	77.2239
1	1084.5	27.2382	4.46696	0.105863	0.473109	0.29648	70.7084
1	980	42.5863	4.85093	0.0956621	0.460417	0.283775	59.7214
1	1047.5	49.1197	4.37479	0.102251	0.447234	0.284632	57.9008
1	1209.5	19.79	3.75888	0.118065	0.439654	0.31193	61.8048
1	1146.5	32.5476	4.22908	0.111915	0.472623	0.272857	80.3967
1	1159.5	74.7671	4.30804	0.113184	0.487411	0.271129	60.4983
1	1116	13.3803	4.57913	0.108938	0.494411	0.276445	72.4408
1	1143	46.4957	4.15373	0.111573	0.461787	0.296639	64.4095
1	1433	12.337	3.79577	0.139881	0.528758	0.31739	83.3377
1	1203	44.4434	4.51236	0.11743	0.520882	0.30339	49.3032
1	991.5	35.2927	4.54342	0.0967847	0.440326	0.275206	58.8758
1	1447.5	23.0281	3.65528	0.141297	0.516221	0.321334	74.6064
1	880.5	16.9096	5.26251	0.0859495	0.453516	0.264877	60.4819
1	1050	12.7552	4.29113	0.102495	0.437169	0.3021	70.3956
1	888	41.8407	5.35319	0.0866816	0.464366	0.257906	67.0318
1	1203	12.3122	4.13057	0.11743	0.480471	0.289774	73.5138
1	1283.5	30.3275	4.08255	0.125288	0.511472	0.284469	71.8731
1	919.5	12.0426	5.3013	0.0897564	0.480908	0.246867	75.8156
1	1033	55.1689	5.04451	0.100836	0.508835	0.233022	77.5192
1	1167	28.2823	4.12134	0.113916	0.46729	0.308401	70.6758
1	1176	17.4807	4.35374	0.114795	0.500067	0.287099	64.5946
1	1071	28.6195	4.71899	0.104545	0.49255	0.283086	56.1665
1	1043	13.471	4.28898	0.101812	0.439689	0.322602	71.5245
1	1106	21.8789	4.2757	0.107962	0.459848	0.31122	67.4732
1	1207.5	17.1524	4.06433	0.117869	0.478863	0.290975	84.7694
1	1245	20.5183	4.21301	0.12153	0.512839	0.311643	71.1038
1	1147	44.9911	4.30716	0.111964	0.482108	0.302182	61.1342
1	1004.5	28.4032	4.94725	0.0980537	0.486188	0.29257	62.4276
1	1400	33.9763	3.95406	0.13666	0.539869	0.304593	64.2826
1	909	33.8384	4.88424	0.0887315	0.433559	0.261933	75.8498
1	1182	34.158	4.17178	0.11538	0.481979	0.319077	46.0725
1	1062.5	27.4056	4.57432	0.103715	0.474841	0.306461	78.473
1	1099	17.8528	4.70944	0.107278	0.504936	0.296557	73.5347
1	1411	91.9869	4.0571	0.137734	0.559008	0.326826	59.6937
1	1325.5	29.9551	4.15804	0.129388	0.535488	0.317565	81.3277
1	1097	44.6328	4.97623	0.107083	0.533165	0.275399	71.7672
1	1035.5	40.7104	4.5183	0.10108	0.456598	0.294356	62.8957
1	1114.5	48.7205	4.47311	0.108791	0.490194	0.303636	77.0991
1	859	13.8949	5.21301	0.0838508	0.438057	0.241594	74.7595
1	1061	28.3084	4.48482	0.103569	0.463761	0.27242	71.8925
1	902	21.239	4.87974	0.0880482	0.421682	0.28103	44.7018
1	1071	22.8276	4.35572	0.104545	0.453871	0.2863	76.2996
1	1189.5	13.5445	4.15859	0.116112	0.482656	0.302285	66.6403
1	789.5	34.153	5.03649	0.0770666	0.385408	0.24261	85.0782
1	1162	37.9538	4.31053	0.113428	0.491283	0.305299	73.7443
1	787	21.1477	5.27989	0.0768225	0.407656	0.235559	81.5874
1	969.5	30.0999	4.17653	0.0946372	0.393083	0.304555	59.4473
1	1502.5	19.5622	3.7798	0.146666	0.554401	0.318991	77.2755
1	1087	14.8518	4.29633	0.106107	0.453739	0.310338	71.3016
1	1049	22.6555	4.38796	0.102398	0.447815	0.257232	58.1818
1	1179.5	18.8462	4.26279	0.115136	0.488642	0.310735	77.1248
1	1009	22.0338	4.39965	0.0984929	0.433493	0.310679	52.745
1	1341	36.106	4.1125	0.130901	0.535662	0.307636	76.1811
1	924	18.4201	4.9035	0.0901957	0.446239	0.303217	45.9766
1	1338	25.9727	4.14131	0.130608	0.538402	0.30718	65.3373
1	1108	22.0087	4.27158	0.108157	0.461983	0.299418	74.3122
1	1044	8.71775	4.23572	0.101909	0.431952	0.275029	80.2435
1	860.5	20.7674	5.03834	0.0839972	0.420249	0.268074	73.8137
1	1136	17.843	4.19848	0.11089	0.465357	0.286177	64.3741
1	1259.5	27.7813	4.48338	0.122945	0.550841	0.307351	88.1323
1	1163.5	38.3482	4.16779	0.113574	0.47026	0.298378	63.6421
1	1269	37.4302	3.90039	0.123873	0.480477	0.309661	72.4944
1	1372	11.844	3.97169	0.133927	0.528841	0.317353	84.6601
1	1317	18.3279	3.83283	0.128558	0.491892	0.308401	83.1319
1	1247.5	14.3783	4.26902	0.121774	0.515492	0.297923	79.1112
1	1163.5	35.7174	4.31539	0.113574	0.493078	0.313075	79.7688
1	1523	28.7864	3.83421	0.148667	0.561243	0.303935	73.3108
1	1062	32.4159	4.37912	0.103666	0.453829	0.258336	70.7877
1	1487	16.157	4.07324	0.145153	0.586161	0.321772	78.5992
1	987.5	54.7628	4.28695	0.0963942	0.407559	0.284664	68.5257
1	1029.5	10.8641	4.58252	0.100494	0.455357	0.301887	56.6945
1	1083.5	26.5461	4.58756	0.105765	0.486143	0.288771	78.7232
1	1223	16.7634	4.19713	0.119382	0.501502	0.289894	80.3901
1	972	18.3404	4.74247	0.0948812	0.450303	0.284038	85.0382
1	980	54.5126	4.96791	0.0956621	0.459118	0.266229	62.2031
1	1065	22.8382	4.34884	0.103959	0.453685	0.307663	60.6968
1	1277	16.3166	4.35588	0.124654	0.539973	0.289356	87.4682
1	826	16.4325	5.31177	0.0806295	0.426561	0.286358	69.7829
1	1308	7.64334	4.12947	0.12768	0.524335	0.286089	79.8009
1	1141	34.4549	4.27807	0.111378	0.48171	0.316215	53.3649
1	1106	20.3542	4.11959	0.107962	0.449363	0.311556	70.3332
1	855	25.247	5.85395	0.0834603	0.488033	0.240083	60.8038
1	1375.5	37.3611	4.20202	0.134269	0.562324	0.312007	73.7871
1	1373	28.514	3.8336	0.134025	0.513822	0.312496	68.4812
1	1329.5	21.0531	3.88334	0.129778	0.499976	0.301419	70.5045
1	877.5	41.1141	4.79222	0.0856566	0.411227	0.245266	69.2032
1	1165	10.3845	4.10898	0.113721	0.464276	0.299654	64.9952
1	957	28.6197	4.62651	0.093417	0.431432	0.268931	64.4978
1	1251.5	25.4096	4.0594	0.122164	0.493957	0.309522	62.1723
1	1200	19.5525	4.09429	0.117137	0.479204	0.298415	81.6685
1	1283	37.604	4.06668	0.125239	0.50921	0.282372	78.9604
1	997	16.9669	4.23856	0.0973216	0.413513	0.310259	66.6321
1	1592	12.6201	3.79227	0.155402	0.588175	0.35074	87.2305
1	1138	16.004	4.2209	0.111085	0.467574	0.322294	72.3203
1	961.5	40.5473	4.77386	0.0938562	0.447663	0.267989	78.6209
1	1003	41.767	4.69033	0.0979072	0.458257	0.272908	81.8844
1	1207	17.9571	4.14056	0.117821	0.482869	0.318772	66.8518
1	1222.5	14.1181	4.11192	0.119334	0.49008	0.308166	76.3647
1	1296	12.6877	4.29758	0.126508	0.537754	0.298501	82.8677
1	1079	43.9932	4.68816	0.105326	0.495949	0.289462	66.5382
1	1138	20.3824	4.21576	0.111085	0.463998	0.303086	58.9233
1	1014	38.2215	4.54434	0.098981	0.451477	0.290399	48.4853
1	1190	21.9284	3.98896	0.116161	0.465285	0.309656	72.5724
1	1247	24.235	4.05528	0.121725	0.490786	0.312906	67.7992
1	1172.5	42.09	4.21838	0.114453	0.481249	0.294128	80.6489
1	871.5	14.058	5.44296	0.0850709	0.459025	0.235039	81.2692
1	1086	14.7546	4.4184	0.106009	0.46824	0.303493	61.0589
1	1227	22.5876	4.18682	0.119773	0.501829	0.313755	70.4643
1	1607.5	13.5161	3.64496	0.156915	0.571719	0.314633	84.301
1	959.5	21.7529	4.8742	0.093661	0.456699	0.252714	71.0544
1	1108.5	41.0317	4.38795	0.108206	0.477728	0.31783	72.5436
1	1387	38.0022	4.1677	0.135391	0.564559	0.291871	80.7635
1	1035.5	38.3785	5.13883	0.10108	0.519336	0.259805	72.2537
1	1195	44.4823	4.05341	0.116649	0.471319	0.301256	80.2078
1	1021.5	17.7591	4.66547	0.0997131	0.469021	0.290752	84.2607
1	846	36.1155	5.21949	0.0825818	0.420153	0.279326	74.0492
1	1172	42.1712	4.12296	0.114404	0.479784	0.3062	84.7445
1	1019.5	26.8066	4.54585	0.0995179	0.449383	0.299395	68.8478
1	1161.5	12.7924	4.42322	0.113379	0.502768	0.30718	74.0509
1	1297.5	25.357	4.00539	0.126655	0.507582	0.304891	74.4284
1	1084.5	11.4668	4.35818	0.105863	0.460376	0.307328	72.1532
1	1138.5	26.7557	4.15885	0.111134	0.463921	0.300649	84.3869
1	1086	41.0009	4.92624	0.106009	0.518635	0.296539	44.0938
1	1162	64.6744	4.35613	0.113428	0.484417	0.289618	64.3895
1	1284.5	15.53	4.3741	0.125386	0.54667	0.289362	87.1809
1	1403	57.8881	4.17081	0.136953	0.572173	0.330798	72.5269
1	902	31.5981	4.71067	0.0880482	0.417292	0.273508	67.9891
1	1169.5	14.7282	4.80377	0.11416	0.544517	0.279073	77.7223
1	1232	46.6143	3.83302	0.120261	0.459873	0.306663	76.5441
1	1341.5	73.9149	4.42803	0.13095	0.579577	0.317559	74.3199
1	1112.5	45.3717	4.43706	0.108596	0.478695	0.291611	75.1648
1	1252.5	63.0956	4.07094	0.122262	0.501557	0.344652	88.3792
1	1067.5	51.2984	4.6498	0.104203	0.484634	0.282046	82.7551
1	1263	48.5499	3.80269	0.123287	0.46828	0.305529	60.7058
1	873.5	20.8745	4.99752	0.0852662	0.425742	0.258955	71.8219
1	1043.5	63.5086	4.13368	0.101861	0.42218	0.296646	72.7457
1	1075.5	63.1654	4.65055	0.104984	0.470709	0.279729	58.1744
1	1002.5	27.0264	4.81621	0.0978584	0.472169	0.273494	80.0889
1	1195.5	15.4686	4.63057	0.116698	0.535936	0.27775	85.5694
1	1198.5	53.7104	4.1082	0.116991	0.479107	0.270189	54.6348
1	1331.5	32.9009	4.004	0.129974	0.516222	0.306487	80.9489
1	1375.5	32.2355	4.05351	0.134269	0.542872	0.300188	67.7197
1	1048	52.7821	4.44806	0.1023	0.452762	0.293224	67.3983
1	1373	32.2664	3.94775	0.134025	0.527555	0.336588	73.9636
1	1246.5	20.7511	4.42318	0.121676	0.53019	0.278142	74.9314
1	1131	40.4528	4.71532	0.110402	0.519505	0.310935	73.3343
1	1145.5	24.5726	4.27599	0.111817	0.476292	0.283447	79.4929
1	1037.5	29.296	4.73339	0.101275	0.478512	0.269496	68.3882
1	1367.5	12.7787	3.87816	0.133488	0.517624	0.292816	81.8601
1	1564	67.5118	3.82756	0.152669	0.583103	0.331254	73.7376
1	1000.5	33.901	4.51296	0.0976632	0.443033	0.306671	67.2671
1	1100	42.1029	4.39381	0.107376	0.471815	0.29603	53.5889
1	1447.5	72.0409	4.06028	0.141297	0.575547	0.337578	80.6502
1	1135	22.5093	4.43142	0.110792	0.490487	0.294306	85.0829
1	972	19.3226	4.43121	0.0948812	0.416642	0.288335	57.7353
1	866.5	12.4038	4.86792	0.0845829	0.411298	0.232814	73.0134
1	870	59.3939	5.00709	0.0849245	0.432571	0.274647	73.976
1	992	44.0152	4.42	0.0968335	0.427095	0.295586	69.6075
1	909	8.96116	4.98059	0.0887315	0.437487	0.26917	68.3894
1	1085	52.661	4.29611	0.105912	0.455573	0.315751	48.8609
1	1097	25.8577	4.25217	0.107083	0.455155	0.299049	66.2523
1	1315.5	31.6918	4.32993	0.128412	0.555982	0.315951	75.2128
1	1068.5	14.5308	4.50396	0.104301	0.467993	0.269701	82.0691
1	1039	22.3541	4.70084	0.101421	0.475262	0.27918	63.2827
1	1172	37.7925	4.22703	0.114404	0.480208	0.315441	64.2779
1	1226.5	19.5561	3.79479	0.119724	0.456355	0.337724	63.2269
1	1078	44.4172	4.27989	0.105228	0.452257	0.289858	48.9038
1	1014.5	19.8745	4.65616	0.0990298	0.45907	0.285076	84.9885
1	1347	48.2903	4.09321	0.131487	0.535463	0.287625	83.5469
1	1064	34.5874	4.26089	0.103862	0.441467	0.283224	81.4179
1	1065.5	44.6413	4.65063	0.104008	0.481936	0.305558	50.4089
1	1126	52.0875	4.28031	0.109914	0.469298	0.288499	52.8828
1	1135	27.0401	4.26813	0.110792	0.470521	0.290599	73.1134
1	1522	34.3561	3.82868	0.148569	0.56707	0.309915	82.8102
1	1079	32.0833	4.7537	0.105326	0.501155	0.267305	81.9261
1	1039.5	15.9314	4.30809	0.10147	0.433582	0.266934	72.0229
1	1355	19.8845	4.13996	0.132268	0.550972	0.321752	74.6501
1	1201	32.2272	4.29325	0.117235	0.500468	0.303795	80.1105
1	1183	15.5817	4.19791	0.115478	0.483622	0.295509	74.067
1	1045	25.2688	4.55737	0.102007	0.463702	0.275864	80.7569
1	1261	33.7783	4.04541	0.123092	0.496982	0.310992	58.8747
1	955.5	34.6999	5.10494	0.0932706	0.476812	0.249925	69.9311
1	1041	51.5476	4.58741	0.101617	0.459476	0.2736	69.026
1	943	18.4322	4.80607	0.0920504	0.435812	0.2738	69.72
1	1118.5	44.1582	4.14313	0.109182	0.452295	0.29524	81.6757
1	909.5	30.9618	5.02473	0.0887803	0.446419	0.269014	82.3225
1	1479.5	26.7732	3.77887	0.144421	0.538382	0.317431	81.6983
1	1077.5	32.5783	4.56451	0.10518	0.473835	0.311387	80.1881
1	1447.5	49.9679	3.92407	0.141297	0.548612	0.307521	74.9432
1	1046.5	29.1608	4.37928	0.102153	0.446308	0.290818	48.4358
1	1062	22.3623	4.39186	0.103666	0.453718	0.276546	79.4666
1	1337	13.7818	3.97324	0.13051	0.517367	0.300017	71.82
1	1451	39.7459	3.8487	0.141638	0.552075	0.358037	79.8598
1	1135	43.4596	4.08564	0.110792	0.451205	0.299512	72.1747
1	1191	16.0246	4.34312	0.116259	0.504038	0.279674	85.6101
1	1076	69.4002	4.74987	0.105033	0.494666	0.258585	66.7707
1	1106	66.5475	4.68964	0.107962	0.507962	0.299049	68.6888
1	926	9.52359	4.45427	0.0903909	0.403032	0.29565	76.8749
1	1218	23.7659	3.8411	0.118894	0.451762	0.332358	73.469
1	1017	23.1449	4.48557	0.0992738	0.446031	0.279009	69.401
1	1196	27.5909	3.91389	0.116747	0.455133	0.313972	70.3939
1	1144	36.0576	4.26736	0.111671	0.476389	0.287017	79.9995
1	1176	16.5012	3.84631	0.114795	0.435876	0.305172	67.9952
1	1280	37.5651	3.89653	0.124946	0.484468	0.304957	67.7671
1	1010.5	23.3051	4.36355	0.0986394	0.431368	0.273522	84.9033
1	1329.5	24.8845	4.26883	0.129778	0.546799	0.297414	82.1283
1	932.5	32.8055	5.85803	0.0910254	0.533182	0.260928	78.5107
1	1082	34.519	4.26666	0.105619	0.45152	0.300493	75.3036
1	1329	37.7033	4.16267	0.12973	0.528739	0.310216	76.9667
1	1297.5	27.0793	3.95123	0.126655	0.500082	0.311564	80.3703
1	886	42.342	4.90375	0.0864864	0.430078	0.273909	49.3085
1	1100.5	21.2839	4.16326	0.107425	0.447236	0.29714	65.8566
1	1269.5	34.1108	3.73501	0.123921	0.462568	0.324154	69.0018
1	1240.5	19.2481	3.97614	0.121091	0.479206	0.29273	67.2837
1	1379.5	21.4073	4.09604	0.134659	0.549684	0.32167	84.9804
1	1136.5	34.7184	4.20791	0.110939	0.454819	0.296614	76.2182
1	1151	37.1198	4.2903	0.112354	0.483813	0.309687	79.6144
1	851.5	17.6664	4.66599	0.0831187	0.388296	0.275257	79.8162
1	1164	31.2526	4.36569	0.113623	0.495749	0.282967	80.2264
1	1165.5	37.8185	3.89603	0.11377	0.442296	0.318629	63.604
1	1390	53.1476	3.98646	0.135684	0.537481	0.323419	67.3535
1	992.5	55.0926	4.75175	0.0968823	0.445359	0.274931	31.7161
1	1402.5	35.0023	4.15023	0.136904	0.556343	0.3016	80.0707
1	737	13.5013	4.99239	0.0719418	0.358401	0.259518	66.5427
1	799.5	36.6799	5.20682	0.0780427	0.413227	0.256422	72.0794
1	1254.5	35.1024	4.14353	0.122457	0.505398	0.297677	85.9021
1	926	12.0341	4.57773	0.0903909	0.409152	0.269584	79.898
1	1284	58.5491	4.11204	0.125337	0.516601	0.317543	63.5267
1	1276.5	32.941	4.30694	0.124605	0.527639	0.294512	81.7696
1	1231	41.4972	4.1088	0.120163	0.491561	0.298893	73.4316
1	1095.5	64.5747	5.11858	0.106937	0.54733	0.232748	83.2585
1	889.5	27.1786	4.77183	0.086828	0.409571	0.270538	79.0274
1	1153.5	17.0891	4.34046	0.112598	0.487758	0.306439	76.1451
1	953	39.3573	4.90449	0.0930265	0.455144	0.265145	68.6786
1	998	46.8371	4.81416	0.0974192	0.467179	0.2717	69.1006
1	1090.5	29.7647	4.76063	0.106449	0.504398	0.288749	77.5798
1	1185	31.6454	4.35046	0.115673	0.503471	0.292167	77.0068
1	1291.5	18.6228	4.31262	0.126069	0.542358	0.28338	76.7175
1	1035.5	26.8509	4.26627	0.10108	0.425512	0.305995	71.9102
1	1020.5	20.7472	4.56325	0.0996155	0.447553	0.27025	71.565
1	1082.5	8.94507	4.56722	0.105668	0.482308	0.283036	82.3003
1	1228	33.7744	4.09749	0.11987	0.489655	0.292466	53.6781
1	874.5	28.7408	4.87607	0.0853638	0.417061	0.275042	86.0644
1	866	28.7392	5.23014	0.0845341	0.439542	0.253468	55.6757
1	1237.5	38.2856	4.20287	0.120798	0.50505	0.305957	80.4114
1	1239	36.2793	3.91667	0.120944	0.454818	0.317171	76.6201
1	1098.5	11.8337	4.13339	0.107229	0.439822	0.295087	72.2822
1	1557.5	24.3484	3.88833	0.152034	0.589363	0.323773	73.7328
1	940.5	28.9392	4.47298	0.0918063	0.409699	0.30103	70.3979
1	1240	22.4195	4.38612	0.121042	0.525024	0.273654	76.0767
1	1035	22.5806	4.68673	0.101031	0.467951	0.276015	71.4994
1	1147.5	35.6258	4.25032	0.112013	0.47672	0.292967	68.3785
1	1055.5	14.6782	4.26996	0.103032	0.438646	0.289823	76.93
1	1076.5	10.0599	4.39244	0.105082	0.462512	0.306145	57.2017
1	1128.5	36.9906	4.18659	0.110158	0.452791	0.284855	52.3192
1	1398	38.856	4.04714	0.136465	0.550336	0.327742	76.879
1	1060.5	29.8896	4.63776	0.10352	0.480565	0.305501	79.0122
1	1114	38.013	4.27845	0.108742	0.465451	0.286931	66.6476
1	1104	23.5461	4.48002	0.107766	0.477778	0.281625	81.0165
1	1247	12.6293	4.04972	0.121725	0.489555	0.311302	84.9122
1	1141	25.471	4.32905	0.111378	0.476863	0.270509	65.5743
1	984	28.75	5.02042	0.0960526	0.472439	0.258191	73.8826
1	1240.5	58.2751	4.35689	0.121091	0.511002	0.27871	81.1682
1	1130.5	25.1926	4.47748	0.110353	0.494556	0.308492	78.0287
1	1186	61.5658	4.29452	0.115771	0.497635	0.285895	78.4656
1	871	28.3446	4.94715	0.0850221	0.411236	0.262627	71.8259
1	1498	21.2476	3.77409	0.146226	0.551955	0.340172	88.1014
1	985	31.0906	4.62138	0.0961502	0.44433	0.271469	71.0507
1	934.5	18.3565	4.68182	0.0912207	0.426901	0.265145	62.5075
1	1158	27.4077	4.40069	0.113037	0.497207	0.282967	79.2449
1	1061	13.4131	4.39404	0.103569	0.455067	0.271016	71.0442
1	947.5	41.9235	5.41564	0.0924896	0.500593	0.24288	61.7767
1	1233.5	26.2829	4.09745	0.120407	0.493849	0.296036	72.3114
1	1257	28.096	4.69232	0.122701	0.573828	0.28652	85.5425
1	1160	52.1947	3.96155	0.113233	0.444753	0.330471	66.3772
1	1377	17.2895	3.76276	0.134415	0.505721	0.324466	69.1711
1	955	18.5915	4.88089	0.0932218	0.451002	0.271686	79.6437
1	1056.5	33.9914	4.49632	0.10313	0.448967	0.267609	83.4964
1	1045	37.7773	4.60111	0.102007	0.472199	0.297234	80.3184
1	1143.5	13.7854	4.55945	0.111622	0.504417	0.277051	84.4748
1	1410	23.0413	4.11008	0.137636	0.566368	0.332171	77.9779
1	1054	19.7083	4.13203	0.102886	0.424436	0.301856	67.2324
1	969	14.4998	4.65284	0.0945884	0.443546	0.293609	73.6575
1	1515.5	12.4598	3.85214	0.147935	0.570279	0.324154	80.0389
1	899.5	31.4495	5.28117	0.0878041	0.464291	0.265317	63.8136
1	1242	16.8766	3.97594	0.121237	0.482024	0.309122	68.1246
1	1155	18.0756	4.46857	0.112745	0.500624	0.275076	65.2759
1	1334.5	38.9866	3.87261	0.130266	0.49865	0.3136	69.5216
1	1314.5	23.2984	4.19532	0.128314	0.537379	0.300067	79.8858
1	1071.5	41.0891	4.41696	0.104594	0.463003	0.287876	56.4371
1	1184	41.3095	4.82405	0.115575	0.55372	0.263088	69.5692
1	1378	35.7086	4.05867	0.134513	0.546877	0.298415	77.3378
1	1382.5	42.4765	4.12631	0.134952	0.549457	0.307982	85.9523
1	1195	52.9359	4.51489	0.116649	0.52495	0.283258	70.6701
1	1208	36.3591	4.49475	0.117918	0.527139	0.27224	84.6164
1	1211	32.9332	3.88305	0.118211	0.453454	0.31295	78.7034
1	965.5	11.904	4.53113	0.0942467	0.429329	0.282902	84.3645
1	1132	43.7518	4.38104	0.1105	0.488412	0.287612	50.9443
1	1208.5	41.7103	4.3813	0.117967	0.519704	0.315038	82.6996
1	1040	37.1532	4.30313	0.101519	0.425464	0.292642	64.2164
1	905.5	31.3819	4.81172	0.0883898	0.425765	0.273663	73.1728
1	1020.5	24.1859	4.64549	0.0996155	0.463605	0.268872	85.6784
1	1307	20.5877	4.0738	0.127582	0.518689	0.300876	78.8989
1	1005	35.5024	4.78862	0.0981025	0.467972	0.260478	67.2273
1	1206.5	32.1487	4.71747	0.117772	0.55526	0.28508	79.4902
1	1132.5	21.5789	4.14237	0.110548	0.458849	0.309081	83.327
1	1096	17.3324	4.19446	0.106985	0.445246	0.284834	68.6917
1	1191	30.4997	4.4228	0.116259	0.505455	0.314457	78.8727
1	960	54.2282	4.69451	0.0937098	0.439661	0.285055	60.9103
1	1193.5	27.9513	3.90746	0.116503	0.450815	0.3217	54.2175
1	1297.5	41.6828	3.96749	0.126655	0.508159	0.338692	73.0791
1	1042	32.8775	4.53976	0.101714	0.467247	0.279868	74.4298
1	1480	38.6147	3.88689	0.144469	0.562486	0.313975	61.9369
1	1102.5	31.5531	4.53008	0.10762	0.481513	0.308534	68.632
1	1290	34.1239	4.19827	0.125923	0.534817	0.309568	83.2687
1	953.5	13.0938	4.63336	0.0930753	0.429418	0.288423	68.3464
1	1235	21.4402	4.04968	0.120554	0.492005	0.31042	60.7687
1	1024.5	53.5734	4.97223	0.100006	0.50212	0.283666	69.2169
1	1253.5	58.7286	4.16059	0.12236	0.509575	0.298641	80.4289
1	949.5	25.2046	4.50975	0.0926849	0.419445	0.291316	59.9978
1	1083.5	20.8096	4.2762	0.105765	0.454403	0.298123	60.9277
1	1227	46.6318	4.4248	0.119773	0.521992	0.292896	85.0154
1	1089	9.42264	4.30183	0.106302	0.455063	0.292578	85.7818
1	988	47.7534	4.61531	0.096443	0.440368	0.292078	67.0787
1	1162	49.9274	4.10187	0.113428	0.464976	0.300514	78.6137
1	1069.5	49.7067	4.39167	0.104399	0.451697	0.282675	82.5624
1	1013	24.6858	4.54035	0.0988834	0.438527	0.272393	76.8404
1	957	11.6349	4.73901	0.093417	0.448051	0.282303	76.1377
1	1162	41.6726	5.1064	0.113428	0.555966	0.262	77.0744
1	1125.5	8.50893	4.2171	0.109865	0.462326	0.300241	82.3735
1	800	11.5082	5.79825	0.0780915	0.452588	0.219355	80.6001
1	1170	25.4223	4.10578	0.114209	0.470344	0.321601	71.774
1	1186	27.7167	4.33861	0.115771	0.502832	0.263203	89.0154
1	993.5	36.1733	4.98479	0.0969799	0.485832	0.292094	72.7802
1	951	52.9713	5.37669	0.0928313	0.500273	0.286797	64.0704
1	1066	17.4422	4.35654	0.104057	0.448998	0.293922	59.6164
1	1275.5	39.1058	4.2471	0.124507	0.529455	0.313903	68.2607
1	1319.5	20.7453	4.20558	0.128802	0.540838	0.308302	77.0046
1	1313.5	28.2947	3.92316	0.128217	0.503341	0.314429	71.427
1	1171	17.6886	4.17396	0.114306	0.47713	0.313445	69.2982
1	1302	38.7593	4.15645	0.127094	0.528228	0.292993	75.2867
1	1208.5	26.0668	4.44364	0.117967	0.519858	0.292826	80.5305
1	1128	18.8315	4.55051	0.110109	0.497004	0.288026	68.2918
1	1204.5	36.0829	3.88679	0.117577	0.454228	0.311489	64.5658
1	903	20.1703	5.04953	0.0881458	0.447776	0.258783	74.1585
1	1153	33.9716	4.32632	0.112549	0.488137	0.2809	86.1481
1	850	22.0319	4.85867	0.0829722	0.401992	0.290589	59.8919
1	1176.5	40.4144	4.56467	0.114843	0.521499	0.284927	65.0077
1	1099.5	26.1082	4.46146	0.107327	0.475814	0.274228	69.3569
1	1352	14.3133	4.16653	0.131975	0.550516	0.31222	86.5498
1	907.5	24.8296	5.2372	0.0885851	0.469658	0.275963	73.6525
1	858	30.7399	4.90599	0.0837532	0.409189	0.296121	76.2325
1	1077.5	14.5571	4.02417	0.10518	0.422123	0.278193	54.1557
1	1095.5	23.6815	4.49971	0.106937	0.479131	0.304382	69.9452
1	1013	42.8987	4.6436	0.0988834	0.460135	0.288066	77.6002
1	1057.5	30.6571	4.32385	0.103227	0.444072	0.301727	80.3881
1	922	18.888	4.93215	0.0900005	0.44034	0.279672	78.9286
1	1256.5	38.6809	4.29622	0.122652	0.527823	0.304105	86.9452
1	1015	38.4725	4.52142	0.0990786	0.447223	0.291899	52.2712
1	1003.5	18.2072	4.65732	0.0979561	0.451998	0.277295	83.8735
1	1402.5	40.5178	3.84458	0.136904	0.52623	0.315863	68.1917
1	958	19.4178	4.69742	0.0935146	0.441347	0.274246	71.7832
1	927	54.2158	4.80353	0.0904885	0.436946	0.277326	42.5089
1	927	51.795	4.56287	0.0904885	0.412659	0.281348	79.8853
1	1031.5	36.3944	4.53778	0.100689	0.457788	0.290493	72.4188
1	1284.5	55.5971	4.09721	0.125386	0.512896	0.307558	59.0447
1	1234.5	42.7148	4.43103	0.120505	0.533992	0.309325	82.8224
1	990	24.3316	4.62332	0.0966383	0.444595	0.293693	64.8647
1	1175.5	34.0832	4.37362	0.114746	0.507528	0.317051	63.1524
1	922.5	15.8368	5.59138	0.0900493	0.506984	0.246229	54.545
1	1280.5	21.6539	3.99426	0.124995	0.499633	0.334666	66.2364
1	956.5	21.3063	4.61694	0.0933682	0.43193	0.282273	72.2111
1	1407.5	15.9746	3.96171	0.137392	0.5417	0.308455	87.0675
1	940.5	48.8702	4.83456	0.0918063	0.439005	0.255961	69.8446
1	1043	15.7994	4.32704	0.101812	0.435279	0.303938	64.2043
1	969	8.82838	4.70845	0.0945884	0.445275	0.280712	84.374
1	1212.5	10.6358	4.09012	0.118357	0.481445	0.290991	74.2303
1	1281.5	33.4987	4.21732	0.125093	0.528056	0.305528	81.1841
1	960.5	22.2262	4.84221	0.0937586	0.453276	0.250507	69.3657
1	1155	11.9837	4.27737	0.112745	0.478849	0.277038	83.9928
1	1332	33.3242	4.01682	0.130022	0.522668	0.303946	81.6372
1	1156.5	22.1677	4.34905	0.112891	0.492109	0.289597	81.0276
1	1117	16.4963	4.32556	0.109035	0.466093	0.278146	83.4019
1	1055	14.4342	4.56473	0.102983	0.461504	0.272181	73.852
1	987	23.8108	4.6248	0.0963454	0.444847	0.294088	82.4633
1	1095.5	14.8503	4.18595	0.106937	0.44671	0.284149	60.3841
1	1122	41.2007	4.20598	0.109523	0.460708	0.28445	74.0071
1	1168.5	30.7967	4.41958	0.114062	0.504022	0.293357	80.4029
1	1189.5	26.373	4.22066	0.116112	0.490555	0.296811	81.9615
1	1061	53.4059	4.50451	0.103569	0.470266	0.330704	40.9944
1	877.5	20.7453	4.86125	0.0856566	0.412697	0.286878	65.3
1	933.5	9.44262	4.32744	0.091123	0.391285	0.277526	69.787
1	1168	16.408	3.96122	0.114014	0.451559	0.324011	66.7776
1	1001.5	26.1628	4.85447	0.0977608	0.475801	0.283128	72.2285
1	1153	19.9349	4.03168	0.112549	0.453186	0.314509	67.6809
1	1063	53.6442	4.61422	0.103764	0.47622	0.267171	74.9452
1	1322.5	29.5667	4.23583	0.129095	0.541708	0.30077	71.8755
1	1085	14.821	4.56921	0.105912	0.483156	0.267986	79.1303
1	974.5	46.1234	4.84978	0.0951252	0.459868	0.272254	70.3865
1	1228	27.2548	4.51474	0.11987	0.540542	0.310312	81.1781
1	1315.5	17.9905	3.84176	0.128412	0.492739	0.321442	63.8191
1	1108.5	39.5076	4.46585	0.108206	0.481034	0.274444	86.62
1	1302.5	23.7879	4.15682	0.127143	0.52819	0.301422	80.2287
1	1135.5	17.8489	3.89398	0.110841	0.431653	0.315557	72.611
1	933	44.7582	4.88563	0.0910742	0.441216	0.282601	87.9374
1	1067.5	46.7825	4.50982	0.104203	0.458486	0.270601	66.1396
1	873	21.4751	5.4306	0.0852174	0.458337	0.252568	80.5067
1	1241.5	28.2976	4.46574	0.121188	0.540954	0.281942	75.5797
1	928	23.5251	4.59602	0.0905862	0.421093	0.269615	76.8828
1	1435	23.8713	3.98716	0.140077	0.557398	0.29154	74.3236
1	1044.5	11.4063	4.68567	0.101958	0.479132	0.292736	81.4887
1	1210.5	21.8502	4.63203	0.118162	0.539275	0.275317	75.5436
1	1260	27.2448	4.36331	0.122994	0.541106	0.309446	67.067
1	1325.5	28.1684	3.85757	0.129388	0.499294	0.333715	86.9749
1	998.5	40.8296	4.53371	0.097468	0.442386	0.278868	81.4102
1	1050.5	40.0316	4.40154	0.102544	0.447484	0.298247	68.1281
1	1020	42.7187	4.84094	0.0995667	0.475944	0.277621	75.4767
1	1153.5	26.3391	4.29622	0.112598	0.483924	0.311937	67.4006
1	1549	43.213	3.73266	0.151205	0.56433	0.32559	80.108
1	1274	25.5411	4.02716	0.124361	0.499787	0.315799	84.5037
1	1134.5	31.3778	4.3439	0.110744	0.479706	0.297364	66.0714
1	1015.5	10.9075	4.53235	0.0991274	0.449976	0.282866	79.8852
1	1090.5	29.4972	4.29849	0.106449	0.459351	0.300627	81.4203
1	1067.5	22.3021	4.85829	0.104203	0.506362	0.253223	86.6477
1	1098	12.9283	4.28381	0.107181	0.460666	0.307166	79.3347
1	1176	20.242	3.99963	0.114795	0.457668	0.304859	77.5532
1	967	23.3971	4.6	0.0943931	0.435432	0.286513	89.185
1	991.5	28.0471	4.96555	0.0967847	0.480374	0.290092	73.1272
1	1292	44.72	3.87357	0.126118	0.486543	0.346572	59.9311
1	1213	11.7105	4.27222	0.118406	0.504943	0.283076	73.3133
1	1134	13.8542	4.3474	0.110695	0.481038	0.281932	66.5293
1	861	52.3328	5.19492	0.084046	0.435127	0.269836	78.8857
1	1071	45.3061	4.22489	0.104545	0.442472	0.314319	61.8997
1	1067	16.9369	4.49968	0.104155	0.468545	0.289866	74.6594
1	1082.5	18.6919	4.14964	0.105668	0.437654	0.299335	67.4308
1	1234	27.0906	4.08251	0.120456	0.489419	0.29065	81.7063
1	1223	21.5014	4.40005	0.119382	0.524115	0.297075	63.3961
1	1242.5	39.1488	4.11964	0.121286	0.495207	0.296797	68.2883
1	1073	17.9936	4.57522	0.10474	0.479176	0.294075	66.6052
1	1139	19.7606	4.58482	0.111183	0.509464	0.289245	81.0894
1	1151.5	51.0879	4.19695	0.112403	0.468212	0.286956	60.023
1	1114	32.4665	4.42927	0.108742	0.48057	0.272552	72.7176
1	1447	24.0262	3.76713	0.141248	0.530044	0.311007	70.1637
1	1180	44.4357	4.45573	0.115185	0.510759	0.303258	75.4079
1	1070.5	24.9801	4.42327	0.104496	0.464613	0.290212	70.5517
1	1060.5	19.1132	4.61393	0.10352	0.477574	0.266819	71.7408
1	1046.5	17.4839	4.63607	0.102153	0.475643	0.291674	71.1393
1	1253.5	43.9206	4.14174	0.12236	0.504374	0.29756	73.1763
1	1314	24.5959	4.28057	0.128265	0.54944	0.27889	76.1644
1	1196	16.1457	4.1954	0.116747	0.489826	0.291244	71.4815
1	1090	35.7735	4.19941	0.1064	0.444153	0.283126	60.9212
1	1003.5	24.3268	4.58889	0.0979561	0.449605	0.289853	74.9086
1	1040.5	15.2284	4.46861	0.101568	0.454005	0.270574	77.3212
1	945.5	52.0287	4.80779	0.0922944	0.440731	0.277496	80.4868
1	1221.5	46.3468	4.08947	0.119236	0.483564	0.322784	68.5441
1	860.5	45.4229	4.99659	0.0839972	0.41308	0.248965	81.3761
1	1040	12.0299	4.39408	0.101519	0.443792	0.28122	78.2351
1	1181.5	17.6208	4.12934	0.115331	0.475929	0.288012	71.1803
1	1007.5	19.136	4.51105	0.0983465	0.447531	0.284558	78.2573
1	1003	59.7201	4.73406	0.0979072	0.465393	0.281635	68.7633
1	1000.5	24.4055	5.03954	0.0976632	0.494173	0.275814	64.6424
1	963.5	16.2669	4.70421	0.0940515	0.440251	0.285194	77.5508
1	922.5	14.2871	5.06526	0.0900493	0.445987	0.263854	74.7534
1	1136.5	59.5336	4.36591	0.110939	0.486024	0.304307	71.1942
1	1062	21.2013	4.79732	0.103666	0.497194	0.272671	74.5181
1	1519	61.9244	3.78938	0.148276	0.556339	0.325195	65.7078
1	1052.5	27.3424	4.73339	0.102739	0.488244	0.284037	78.9018
1	1327.5	22.2569	4.1713	0.129583	0.542904	0.308664	71.8191
1	1143	19.5267	4.21327	0.111573	0.473734	0.293272	71.4453
1	1139.5	16.6274	4.17132	0.111232	0.464026	0.299956	78.4292
1	1178.5	24.8458	4.46636	0.115039	0.508456	0.281653	77.6733
1	1028	32.7128	4.68524	0.100348	0.46961	0.289901	58.1361
1	1282.5	51.4171	4.14318	0.12519	0.52276	0.32954	77.42
1	1089.5	11.6299	4.54142	0.106351	0.487565	0.28923	83.6842
1	1016.5	17.1061	4.58064	0.099225	0.448618	0.281511	56.2042
1	944	24.8708	4.9639	0.092148	0.456442	0.246243	84.9049
1	1056	17.5132	4.56871	0.103081	0.46995	0.264644	82.6283
1	811.5	18.1421	5.24266	0.0792141	0.418178	0.248717	77.0817
1	1395	45.0572	3.71301	0.136172	0.50592	0.335818	79.8409
1	966.5	15.0698	4.59206	0.0943443	0.428363	0.286691	69.5233
1	1239.5	15.9182	4.2908	0.120993	0.517692	0.303783	77.706
1	1095	38.4629	4.2617	0.106888	0.45331	0.273406	81.9167
1	1010.5	7.92085	4.48493	0.0986394	0.443451	0.294798	72.9578
1	1404.5	69.9895	4.08867	0.137099	0.558743	0.30408	79.8663
1	922.5	52.0429	4.86046	0.0900493	0.437654	0.25962	83.1351
1	1160.5	38.2285	4.21776	0.113282	0.476159	0.29648	56.5352
1	1030.5	44.4682	4.93237	0.100592	0.49591	0.265599	76.523
1	956	29.3614	4.93587	0.0933194	0.457445	0.261507	69.7512
1	1033	10.3521	4.4043	0.100836	0.443971	0.28158	57.0221
1	1100.5	13.1561	4.6797	0.107425	0.501202	0.287252	74.6784
1	1103	24.7872	4.41501	0.107669	0.472129	0.298574	75.3973
1	1001	17.0384	4.72268	0.097712	0.456595	0.26663	78.6187
1	979.5	50.734	4.42673	0.0956133	0.420823	0.288056	57.2391
1	916	24.0322	5.03	0.0894148	0.448409	0.259356	60.1164
1	1395.5	32.2718	3.99054	0.136221	0.541823	0.281987	71.8461
1	1195.5	31.0826	4.31998	0.116698	0.510365	0.335164	74.1859
1	842.5	17.0555	5.06215	0.0822401	0.415258	0.264354	60.3875
1	1110	12.0817	4.03986	0.108352	0.437731	0.300704	83.7667
1	1262	24.4485	4.52945	0.123189	0.557727	0.297591	74.4777
1	1209	12.9897	4.0425	0.118016	0.47621	0.290859	75.7763
1	1120	40.1798	5.03845	0.109328	0.548818	0.292998	83.3622
1	1213	34.0273	4.20747	0.118406	0.497423	0.294861	83.915
1	917	15.3946	4.89552	0.0895124	0.434796	0.28185	66.8195
1	1046.5	31.6707	4.67665	0.102153	0.476781	0.271788	72.8059
1	1238	43.2714	4.10802	0.120847	0.496046	0.298434	78.1853
1	1226	47.7797	3.9042	0.119675	0.466993	0.313806	67.7549
1	1095.5	55.4346	4.38356	0.106937	0.471206	0.298593	57.1471
1	931	9.49049	4.56361	0.090879	0.414826	0.283447	77.1416
1	1537	30.2003	3.76916	0.150033	0.565632	0.312769	71.0242
1	1119.5	20.3292	4.80474	0.109279	0.528515	0.288488	81.1692
1	1040.5	42.031	4.61356	0.101568	0.468504	0.26883	85.966
1	1314	44.8764	4.42133	0.128265	0.552448	0.307756	84.7834
1	1064	58.7181	4.49535	0.103862	0.466131	0.277983	62.143
1	962.5	22.7407	5.04042	0.0939539	0.475189	0.264273	65.8668
1	994.5	20.3501	4.55212	0.0970775	0.442431	0.281519	63.8929
1	1175.5	12.8064	4.30049	0.114746	0.485203	0.295947	74.6151
1	1063	50.6088	4.47391	0.103764	0.459507	0.296937	70.8745
1	1007.5	56.1574	4.1967	0.0983465	0.414388	0.285517	69.2036
1	1159	52.9737	3.95193	0.113135	0.448396	0.306068	75.6173
1	1285	35.153	3.94191	0.125435	0.491	0.318819	78.5716
1	1412.5	19.7851	3.87454	0.13788	0.531592	0.30662	85.1631
1	1012	20.7115	4.24715	0.0987858	0.415564	0.293287	83.9208
1	957	23.1151	4.49598	0.093417	0.420807	0.295563	74.0202
1	1318	12.4936	3.95609	0.128656	0.508506	0.306827	84.9821
1	984	16.2427	4.54826	0.0960526	0.439584	0.295892	75.1677
1	1151	29.8658	4.26435	0.112354	0.478942	0.313276	70.9702
1	921.5	20.4766	4.75466	0.0899517	0.429239	0.2946	58.6749
1	1319.5	42.6489	4.09027	0.128802	0.523686	0.31176	89.2622
1	1371.5	28.7588	4.15998	0.133878	0.556657	0.308104	71.7165
1	999.5	21.5853	4.74292	0.0975656	0.471278	0.291959	80.7853
1	1488.5	56.0309	4.02177	0.145299	0.58462	0.321569	76.1982
1	1134	24.8989	4.21342	0.110695	0.464304	0.286611	72.699
1	969.5	12.7323	4.47366	0.0946372	0.417422	0.303954	76.2619
1	1026	22.9409	4.70542	0.100152	0.463138	0.300335	46.0944
1	1151	38.6361	4.22743	0.112354	0.472912	0.304897	62.9589
1	1245.5	57.816	4.12697	0.121579	0.501321	0.294025	64.8227
1	1270.5	18.1806	4.25449	0.124019	0.527585	0.2964	80.9996
1	1287.5	15.9832	4.1399	0.125679	0.514892	0.291839	72.8795
1	1016.5	14.1886	4.50046	0.099225	0.443608	0.292528	54.3541
1	842.5	20.2254	4.88002	0.0822401	0.398444	0.271511	78.1853
1	1073.5	25.1358	4.34707	0.104789	0.454439	0.280677	56.9419
1	978.5	28.712	4.85571	0.0955157	0.465105	0.295901	86.7468
1	1071.5	25.4958	4.36309	0.104594	0.45643	0.292298	50.8378
1	1275	30.1523	4.05288	0.124458	0.504805	0.299434	74.6212
1	1147.5	31.5583	4.26918	0.112013	0.471465	0.285852	78.6814
1	1226	34.218	4.0598	0.119675	0.481278	0.28693	77.2226
1	1091.5	22.332	4.55353	0.106546	0.483383	0.277996	86.401
1	1041.5	28.0239	4.54997	0.101665	0.460471	0.270515	83.7891
1	1280	61.5156	4.02731	0.124946	0.501453	0.309606	83.9975
1	1093	26.463	4.21414	0.106693	0.448671	0.281281	67.5147
1	1187	25.6938	4.60687	0.115868	0.53452	0.293922	83.9021
1	1326.5	18.7518	4.17614	0.129486	0.531982	0.305218	72.5746
1	1288	18.4733	4.09591	0.125727	0.512646	0.290434	61.9852
1	886	37.4057	4.92074	0.0864864	0.425554	0.242979	74.0446
1	1147	37.4548	4.72018	0.111964	0.527385	0.256908	76.2996
1	1177	26.668	4.19798	0.114892	0.481325	0.28652	60.8763
1	1515	40.7082	3.77361	0.147886	0.551476	0.315727	76.3852
1	929	62.3411	4.68129	0.0906838	0.423627	0.267848	77.4435
1	1113	34.7638	4.28355	0.108645	0.45576	0.299849	73.9037
1	1391.5	20.2467	3.85406	0.13583	0.523064	0.320143	86.4181
1	1256.5	14.8177	4.02066	0.122652	0.48628	0.30628	77.5972
1	1292.5	32.3796	4.16626	0.126167	0.525176	0.287524	82.4343
1	990.5	40.8647	4.79382	0.0966871	0.463742	0.271497	70.0075
1	1160.5	11.1362	4.18838	0.113282	0.468988	0.288026	72.0222
1	1103	25.5059	4.57496	0.107669	0.491919	0.279567	86.6542
1	1061	25.2475	4.44347	0.103569	0.461688	0.306795	70.5288
1	921.5	21.5685	4.94122	0.0899517	0.43733	0.269104	77.8095
1	1108	19.2172	4.39516	0.108157	0.474148	0.299197	67.7624
1	1069	45.2647	4.8485	0.10435	0.505611	0.279073	61.2226
1	920.5	30.6219	5.06478	0.0898541	0.44825	0.254356	79.509
1	1326.5	56.5109	4.39957	0.129485	0.569925	0.290774	77.1032
1	1199.5	47.3123	4.14815	0.117088	0.486528	0.304935	77.1835
1	1325.5	22.8179	3.90395	0.129388	0.504857	0.32359	81.5074
1	1147	34.6949	4.35232	0.111964	0.490042	0.302846	84.3043
1	930.5	11.3313	5.05654	0.0908302	0.456198	0.269912	73.8513
1	905	28.3002	5.00158	0.088341	0.440449	0.25694	82.1038
1	877.5	56.3056	5.58745	0.0856566	0.479816	0.254888	72.861
1	961.5	36.2497	4.69766	0.0938562	0.441535	0.29257	71.6254
1	1070.5	26.1663	4.45515	0.104496	0.46761	0.320884	42.4835
1	790	14.5293	5.52979	0.0771154	0.437306	0.232575	51.2323
1	899.5	16.589	4.9103	0.0878042	0.428257	0.267768	74.8605
1	1048	22.0544	4.98793	0.1023	0.514009	0.25194	76.4903
1	1071	34.1314	4.63898	0.104545	0.482463	0.264854	80.6015
1	1106.5	14.5507	4.34928	0.10801	0.469229	0.307868	53.4282
1	1116	29.2027	4.16643	0.108938	0.448874	0.301995	68.8054
1	1579	70.2432	3.69247	0.154133	0.555574	0.379793	73.7776
1	1459	20.2588	4.00504	0.142419	0.564606	0.309946	71.7108
1	1009.5	34.9874	4.25693	0.0985417	0.419734	0.304654	65.6645
1	1222	18.7891	4.0187	0.119285	0.478505	0.308534	75.1866
1	943.5	40.0967	4.37371	0.0920992	0.402784	0.283855	73.8263
1	879.5	38.9451	5.06551	0.0858519	0.429497	0.245298	64.8056
1	1367.5	50.4515	3.85071	0.133488	0.512436	0.309656	50.0093
1	923	39.8237	4.89142	0.0900981	0.442444	0.262223	69.3911
1	1199.5	22.9061	4.34955	0.117088	0.508084	0.303217	89.7198
1	1186	67.7887	4.10454	0.115771	0.474852	0.301017	70.1332
1	1044.5	30.7933	4.38679	0.101958	0.442078	0.28089	75.9203
1	1301.5	29.643	4.22494	0.127045	0.536629	0.303856	84.4107
1	937	20.1082	4.85163	0.0914647	0.44372	0.275127	68.6966
1	1008.5	15.6212	4.15217	0.0984441	0.404516	0.30103	56.7583
1	1162.5	29.6617	4.2153	0.113477	0.478343	0.27478	75.9596
1	1207	34.8321	4.01362	0.117821	0.475362	0.311556	77.9687
1	1095	13.0471	4.28317	0.106888	0.456714	0.294765	77.9689
1	993.5	28.3421	4.66383	0.0969799	0.452853	0.278407	80.243
1	1119.5	43.1801	4.44488	0.109279	0.482149	0.299515	78.5239
1	1054	35.2571	4.46669	0.102886	0.461585	0.28742	67.2222
1	1195.5	43.9677	3.9835	0.116698	0.46269	0.305003	80.6366
1	1176	55.8995	4.46197	0.114795	0.507217	0.284789	70.3203
1	1301.5	51.4875	3.97602	0.127045	0.506439	0.329311	68.2028
1	1114	25.1697	4.39304	0.108742	0.473395	0.285601	60.8355
1	1095.5	41.2986	4.09378	0.106937	0.442614	0.302825	61.1787
1	1191	31.4802	4.03342	0.116259	0.469313	0.334294	65.8935
1	948	25.0925	4.83838	0.0925385	0.436521	0.270029	68.1885
1	1371	41.8799	4.1692	0.133829	0.5573	0.315476	77.0964
1	1088	19.2343	4.63803	0.106204	0.494437	0.290935	68.2118
1	874.5	24.3479	4.43978	0.0853638	0.379332	0.295058	84.1435
1	1187	78.2683	4.56627	0.115868	0.522248	0.298464	77.2526
1	1389	37.6026	3.76311	0.135586	0.507301	0.341313	79.7344
1	955	19.5577	4.84753	0.0932218	0.449615	0.256396	87.9075
1	1207.5	31.932	3.95253	0.117869	0.462568	0.312983	71.0653
1	1109.5	34.4917	4.32815	0.108303	0.466357	0.291584	73.9973
1	1198.5	54.2791	4.22603	0.116991	0.49381	0.291131	73.2483
1	1036	20.4441	4.39775	0.101129	0.442955	0.30745	48.0486
1	1492.5	32.9412	3.84722	0.145689	0.560555	0.338094	80.8504
1	1112	26.3214	4.36675	0.108547	0.471113	0.280677	88.3672
1	967.5	14.8724	4.6163	0.0944419	0.433553	0.28119	78.8547
1	938	31.7269	5.06975	0.0915623	0.464644	0.269184	72.8587
1	1228	41.4798	4.28243	0.11987	0.512934	0.308535	74.823
1	1295	44.8617	3.90404	0.126411	0.476449	0.30867	73.7384
1	1128	25.1064	4.40274	0.110109	0.484287	0.279385	77.0809
1	891.5	19.8395	4.37942	0.0870232	0.381342	0.299555	79.9402
1	1306.5	57.7693	3.89278	0.127533	0.494465	0.323361	81.1584
1	937	28.7828	4.86752	0.0914647	0.445139	0.2741	77.649
1	1249.5	66.876	3.77143	0.121969	0.460317	0.322061	74.2781
1	1227	30.3829	4.15765	0.119773	0.492074	0.296923	81.2395
1	1125.5	29.7359	4.72286	0.109865	0.511901	0.219065	80.7825
1	1123	30.9912	4.36684	0.109621	0.483578	0.30261	55.3531
1	1280.5	66.7249	4.31747	0.124995	0.537837	0.297915	82.6661
1	1269	36.3773	4.21614	0.123873	0.519352	0.279518	84.9657
1	1175.5	42.3682	4.4286	0.114746	0.506105	0.309638	84.569
1	1149.5	28.2215	3.94088	0.112208	0.441384	0.308767	57.6315
1	1066	39.6951	4.59349	0.104057	0.478239	0.286878	71.6906
1	867	15.1452	4.55916	0.0846317	0.386263	0.282675	68.5505
1	940.5	41.4006	4.81485	0.0918063	0.443916	0.260371	71.3877
1	847.5	28.157	5.2804	0.0827282	0.43888	0.252301	77.9313
1	1223.5	28.8167	4.50257	0.119431	0.537446	0.275416	80.2003
1	762	15.7807	5.4947	0.0743822	0.412641	0.245574	70.9663
1	1123.5	9.78641	4.31939	0.10967	0.474934	0.304868	64.3851
1	1088	57.1069	4.1683	0.106204	0.441072	0.275546	58.9605
1	1215	12.86	4.23128	0.118601	0.504449	0.299592	80.623
1	983	42.0497	4.91409	0.095955	0.471784	0.287781	65.1737
1	936	28.5156	5.15291	0.0913671	0.466188	0.275666	74.9268
1	1006	32.7527	4.58062	0.0982001	0.4496	0.262199	85.7412
1	928	20.9781	4.84953	0.0905862	0.434959	0.252764	86.1701
1	857.5	25.7322	5.41182	0.0837043	0.454105	0.246103	68.2002
1	1445.5	15.1117	4.0522	0.141102	0.571665	0.317076	83.1356
1	1416	32.3029	4.08134	0.138222	0.566309	0.315751	82.3658
1	1030	34.1016	4.69718	0.100543	0.472381	0.285775	82.9399
1	1279.5	44.6139	3.77851	0.124898	0.469367	0.305172	68.8836
1	1203	43.2762	4.46467	0.11743	0.524564	0.291917	82.6184
1	966	42.1905	4.55735	0.0942955	0.433215	0.283001	69.4094
1	1240	34.9428	4.04202	0.121042	0.489804	0.309695	76.2555
1	1141.5	21.29	4.41962	0.111427	0.491765	0.306704	84.5393
1	1125	44.3503	4.30085	0.109816	0.470215	0.271815	75.4053
1	983.5	73.5009	4.73798	0.0960038	0.452437	0.28488	50.8374
1	987	45.3173	4.77585	0.0963454	0.460042	0.283716	76.2433
1	1154.5	52.8665	4.67296	0.112696	0.528998	0.295157	64.6749
1	997	18.7456	4.61042	0.0973216	0.448421	0.276958	85.4913
1	1111.5	21.7148	4.25805	0.108498	0.459016	0.299962	64.9028
1	1086.5	18.432	4.60244	0.106058	0.483742	0.286838	83.552
1	1125	17.034	4.14371	0.109816	0.454547	0.307642	84.7764
1	1080	20.7678	5.05257	0.105424	0.529422	0.271278	80.2179
1	1074	35.5544	4.51734	0.104838	0.472933	0.284558	56.5244
1	1252.5	33.4181	4.44685	0.122262	0.538888	0.285961	72.2345
1	789.5	8.59972	5.8841	0.0770666	0.450639	0.229778	67.2983
1	1092	23.8596	4.39208	0.106595	0.462906	0.2982	72.7525
1	998.5	41.7779	4.46205	0.097468	0.438813	0.292578	53.0179
1	976	30.9368	5.11893	0.0952717	0.479338	0.270989	77.9758
1	1182.5	23.4913	4.05811	0.115429	0.468511	0.30324	64.3518
1	1175	69.5339	4.38315	0.114697	0.501157	0.278181	59.325
1	957.5	50.7983	4.95978	0.0934658	0.463092	0.253541	80.7147
1	1125	28.525	4.5484	0.109816	0.497277	0.28955	64.0873
1	1008.5	29.7034	4.49151	0.0984441	0.433871	0.271777	75.2561
1	1554.5	39.6806	4.03013	0.151742	0.602213	0.323942	80.8827
1	1232.5	18.6847	4.04449	0.12031	0.48654	0.317076	69.1948
1	1238.5	39.082	4.05325	0.120895	0.48848	0.304416	67.114
1	1387	33.2759	4.06241	0.135391	0.54962	0.322175	71.475
1	1220.5	9.86562	4.24998	0.119138	0.505257	0.293601	87.5886
1	1349.5	53.2178	4.05798	0.131731	0.531374	0.304171	66.0533
1	1175	17.6259	4.1265	0.114697	0.477432	0.315937	60.3348
1	1319.5	24.2538	4.06405	0.128802	0.52355	0.282406	78.1445
1	1126	22.5226	4.1792	0.109914	0.460369	0.282433	79.8907
1	1292.5	14.2746	4.20036	0.126167	0.530248	0.32237	81.6086
1	1089	22.0443	4.67308	0.106302	0.49409	0.284371	63.796
1	972	58.8701	4.7315	0.0948812	0.44531	0.28166	63.7398
1	1314	38.7779	4.02563	0.128265	0.515534	0.318256	57.885
1	764	51.1021	5.69793	0.0745774	0.424501	0.241694	77.871
1	851.5	37.4274	5.03961	0.0831187	0.417588	0.257374	77.4913
1	1085.5	25.7449	4.41812	0.10596	0.467545	0.301507	84.8762
1	1076.5	25.5944	4.48975	0.105082	0.46339	0.29488	69.5258
1	1348.5	33.4583	3.8452	0.131633	0.504777	0.329378	84.3032
1	1136.5	9.04835	4.52477	0.110939	0.501471	0.293805	73.4929
1	1086.5	36.4868	4.6769	0.106058	0.495992	0.286462	80.7825
1	1163	39.6229	4.33227	0.113526	0.489267	0.292909	58.3641
1	1358	50.8586	3.8939	0.13256	0.513051	0.352209	84.4696
1	1205.5	40.0978	4.2432	0.117674	0.500023	0.29336	62.1768
1	1164	33.3899	4.26072	0.113623	0.484349	0.295316	78.7165
1	1340	28.487	4.04461	0.130803	0.529142	0.302384	79.8058
1	942	53.7765	4.74123	0.0919528	0.436428	0.297121	83.0111
1	1077.5	13.6642	4.34315	0.10518	0.458479	0.294815	78.744
1	1445	32.1459	3.70528	0.141053	0.52232	0.327576	72.9471
1	1332	43.619	3.96006	0.130022	0.512959	0.329605	79.1513
1	1004	43.5856	4.8287	0.0980049	0.471021	0.294006	62.3115
1	1408	47.5699	3.85241	0.137441	0.529723	0.303384	80.1842
1	1162.5	21.378	4.12785	0.113477	0.46755	0.285895	74.0177
1	1364	33.8532	3.72343	0.133146	0.495284	0.355741	89.2107
1	918	36.406	4.78134	0.08961	0.427065	0.282544	42.6182
1	1027	19.6254	4.37148	0.10025	0.437695	0.295859	87.2981
1	1412	34.2359	4.50945	0.137832	0.611385	0.321708	79.8981
1	1171.5	19.3	4.38766	0.114355	0.500051	0.282457	74.0372
1	1204.5	47.3174	4.34547	0.117577	0.506105	0.273236	77.672
1	1400.5	27.3349	3.94517	0.136709	0.530813	0.320222	73.1717
1	1020.5	25.3384	4.37353	0.0996155	0.434793	0.270209	77.1358
1	1158	26.8198	4.20443	0.113037	0.475909	0.295942	65.8545
1	942	51.0761	4.83962	0.0919528	0.444681	0.295877	76.6777
1	966	51.8763	4.98329	0.0942955	0.467297	0.279641	72.1523
1	1037	38.4317	4.42574	0.101226	0.440084	0.279575	64.0322
1	1015.5	43.5839	4.82464	0.0991274	0.478075	0.286836	79.6952
1	774	41.6512	5.7629	0.0755535	0.434023	0.239366	70.5228
1	1011	36.9689	5.04478	0.0986882	0.496307	0.263735	77.6543
1	1108	54.8272	4.87127	0.108157	0.523709	0.305055	74.9007
1	1182	42.5926	4.36186	0.11538	0.506592	0.290767	69.9499
1	1123.5	46.6132	4.20747	0.10967	0.459123	0.314755	81.7481
1	964.5	27.6273	4.68914	0.0941491	0.438194	0.268385	74.4328
1	1084.5	28.369	4.56871	0.105863	0.473332	0.290109	80.7022
1	1131	34.5821	4.11424	0.110402	0.453685	0.31119	59.7273
1	1022.5	70.0618	4.96757	0.0998107	0.488029	0.286668	78.7772
1	1318	38.7761	4.38264	0.128656	0.557961	0.325856	87.0611
1	1075	54.9228	4.55052	0.104935	0.479615	0.283582	84.5315
1	1281	50.0465	4.37392	0.125044	0.542899	0.292167	73.6879
1	1174	81.5998	4.37263	0.114599	0.501955	0.304804	64.6615
1	1176.5	60.1728	4.34365	0.114843	0.501386	0.293862	69.0267
1	1076	66.7128	4.70427	0.105033	0.496272	0.27487	79.5052
1	1295	42.2576	4.12457	0.126411	0.521692	0.275325	66.1446
1	1076.5	44.1032	4.80786	0.105082	0.506786	0.25468	81.1786
1	1125.5	20.82	4.46611	0.109865	0.487545	0.307757	77.9607
1	1046.5	32.8745	4.49548	0.102153	0.460047	0.294523	81.0121
1	1471	45.9444	3.96874	0.143591	0.570129	0.330594	78.1014
1	1023.5	31.1281	4.49965	0.0999083	0.44744	0.285098	83.9235
1	982.5	30.1881	4.88144	0.0959061	0.466116	0.310992	71.236
1	621	31.08	6.45127	0.0606185	0.389393	0.185169	81.7333
1	910.5	20.5734	4.73523	0.0888779	0.422396	0.255062	76.431
1	1159	14.3784	3.74547	0.113135	0.424344	0.335696	59.963
1	1043	29.2941	4.37351	0.101812	0.44467	0.288337	73.937
1	1045.5	19.207	4.79423	0.102056	0.489211	0.273582	85.3196
1	922	24.6397	4.96224	0.0900005	0.442566	0.275317	59.5399
1	965.5	23.3042	4.68606	0.0942467	0.441718	0.28966	62.4195
1	1091.5	22.9564	4.17753	0.106546	0.447813	0.299229	57.3876
1	972	22.7038	4.55185	0.0948812	0.431728	0.281269	66.8232
1	1142	32.7603	4.11274	0.111476	0.459257	0.323305	79.1588
1	1193.5	33.5561	4.19367	0.116503	0.486558	0.329953	69.9622
1	951.5	31.2797	4.60591	0.0928801	0.423687	0.273317	74.4047
1	1413	74.8402	4.01316	0.137929	0.553488	0.309805	84.2775
1	947.5	45.969	4.70052	0.0924896	0.43222	0.281184	79.5221
1	1062.5	43.8717	4.79911	0.103715	0.494772	0.317666	84.1052
1	1116.5	48.6659	4.39553	0.108986	0.477534	0.300216	69.6255
1	1220	31.4289	4.20041	0.11909	0.498963	0.29138	73.5205
1	1330	28.4882	3.91591	0.129827	0.49319	0.30556	73.4443
1	1033.5	51.712	4.45173	0.100884	0.449084	0.289894	69.7508
1	857.5	18.0203	5.05988	0.0837043	0.424555	0.252236	74.9394
1	1181.5	22.487	4.31298	0.115331	0.498045	0.306263	70.5577
1	1070	14.1757	4.71741	0.104447	0.492698	0.28519	76.5555
1	1194.5	11.1938	4.31998	0.1166	0.501223	0.290076	65.945
1	860.5	19.5727	4.90507	0.0839972	0.416189	0.254759	82.8707
1	1270	86.6457	4.7292	0.12397	0.585488	0.315724	56.0308
1	1020	33.2355	4.31717	0.0995667	0.431012	0.283244	84.6078
1	1118.5	51.8059	4.6689	0.109182	0.509248	0.267733	81.6753
1	1018.5	31.6156	5.01522	0.0994203	0.501053	0.270729	80.458
1	1136	22.519	4.34207	0.11089	0.48029	0.285066	86.3612
1	1010	11.9309	4.66938	0.0985905	0.459718	0.283209	72.5068
1	989	6.48786	4.43184	0.0965406	0.42686	0.287969	77.9104
1	822	26.9852	4.86251	0.080239	0.391029	0.264896	81.6606
1	1099.5	29.9038	4.4122	0.107327	0.47531	0.289985	49.3813
1	1030	44.4494	4.67834	0.100543	0.470226	0.278385	72.3999
1	1007.5	35.1045	4.16557	0.0983465	0.407594	0.30337	63.8868
1	1207.5	64.7607	4.41667	0.117869	0.516501	0.260517	85.4105
1	1082	43.7564	4.26062	0.105619	0.447175	0.290737	64.9861
1	1069	31.2999	4.22431	0.10435	0.448582	0.315926	33.487
1	847	7.09754	5.54994	0.0826794	0.458731	0.230121	84.2517
1	1329	35.8281	3.98678	0.12973	0.514933	0.313339	81.6338
1	905.5	12.8652	5.00559	0.0883898	0.443545	0.251678	76.8254
1	899.5	26.6997	4.85541	0.0878042	0.429153	0.276194	78.0126
1	678	11.8925	5.99831	0.0661826	0.391352	0.213051	86.2138
1	1025.5	38.5392	4.85976	0.100104	0.483346	0.291864	70.729
1	1172.5	20.5325	4.04123	0.114453	0.454199	0.315768	70.1788
1	977.5	16.0439	4.88603	0.0954181	0.46613	0.272418	63.0071
1	906	34.3542	4.91886	0.0884386	0.436229	0.265568	74.8342
1	983.5	46.1223	4.70333	0.0960038	0.453838	0.269188	88.2508
1	1178	11.1094	3.99077	0.11499	0.458862	0.28361	67.861
1	1573.5	37.5711	3.63555	0.153596	0.556769	0.333869	78.6408
1	879	29.1888	5.0974	0.0858031	0.43763	0.267989	69.941
1	1413.5	16.6321	3.63203	0.137978	0.485442	0.346864	75.6974
1	1000.5	13.6126	4.57245	0.0976632	0.446416	0.284988	77.0313
1	1119	25.7041	4.35989	0.109231	0.476576	0.280907	62.7572
1	1054	13.0819	4.7587	0.102886	0.471904	0.254102	63.3343
1	883.5	14.9083	5.11653	0.0862423	0.444141	0.272521	66.0351
1	919	16.64	5.27755	0.0897076	0.477728	0.276386	70.8641
1	987.5	22.97	4.56398	0.0963942	0.441415	0.293974	78.4836
1	894	12.5532	5.05072	0.0872673	0.442773	0.252802	65.9871
1	973	39.9557	4.75226	0.0949788	0.451187	0.262223	78.65
1	905.5	21.2566	4.89469	0.0883898	0.43168	0.259243	80.4677
1	729.5	16.8039	5.82869	0.0712097	0.419836	0.228822	79.551
1	967.5	30.2485	4.87752	0.0944419	0.462086	0.272573	85.0172
1	1375.5	29.4806	3.72807	0.134269	0.499039	0.344136	79.743
1	1237.5	17.4063	3.84927	0.120798	0.464327	0.33484	69.6721
1	927.5	23.4469	4.58267	0.0905374	0.410934	0.274734	71.2757
1	875.5	45.8536	5.74464	0.0854614	0.495451	0.236662	69.555
1	928	58.8929	4.49774	0.0905862	0.404396	0.284676	54.5572
1	1298	20.4961	3.87696	0.126703	0.493699	0.339493	65.7701
1	904.5	30.7465	4.93208	0.0882922	0.439069	0.274394	51.3824
1	1133	27.0796	4.21026	0.110597	0.463367	0.290137	71.7146
1	1022.5	18.8082	4.71061	0.0998107	0.473264	0.28846	67.7307
1	878	32.8071	5.18388	0.0857054	0.442603	0.268828	71.6325
1	1022.5	8.18353	4.30564	0.0998107	0.429881	0.290799	74.3084
1	1243	24.8806	4.46079	0.121335	0.545717	0.315769	66.4269
1	1014.5	24.9055	4.25784	0.0990298	0.418689	0.283579	85.8653
1	1150	10.65	3.97914	0.112257	0.445232	0.315527	84.6225
1	1314.5	28.4414	3.79771	0.128314	0.487094	0.346137	69.7124
1	1064.5	32.0549	4.10997	0.103911	0.428312	0.315028	72.3156
1	1126	29.421	4.24468	0.109914	0.469394	0.298527	74.0086
1	1214.5	29.92	4.10988	0.118553	0.484824	0.319786	81.1886
1	1042	34.3662	4.28818	0.101714	0.439156	0.289136	53.4082
1	1074.5	32.7825	3.92975	0.104887	0.411408	0.320712	34.6139
1	1350	45.7321	4.11718	0.131779	0.546343	0.322293	55.833
1	1105.5	24.6224	4.38093	0.107913	0.465816	0.277743	84.4221
1	1073.5	23.3279	4.25201	0.104789	0.439396	0.314859	65.9029
1	925.5	29.5529	4.72283	0.0903421	0.42584	0.29015	67.8613
1	827	34.2315	5.0135	0.0807271	0.397868	0.24781	82.2209
1	1400	29.1637	3.9372	0.13666	0.533883	0.312532	71.6817
1	984	12.5821	4.3455	0.0960526	0.418285	0.291043	65.4606
1	852	17.5777	5.04163	0.0831675	0.422445	0.260232	48.0674
1	1199.5	8.9963	4.31504	0.117088	0.505198	0.287124	86.4118
1	1039.5	21.1596	4.79464	0.10147	0.48655	0.281214	71.4446
1	995	24.2635	4.57165	0.0971263	0.444002	0.272579	67.3451
1	923	41.155	5.01281	0.0900981	0.450525	0.261833	85.8025
1	1106.5	40.5752	4.32577	0.10801	0.467098	0.297198	75.8218
1	1043	55.9274	4.64374	0.101812	0.472983	0.281608	62.3336
1	936	13.3466	4.3787	0.0913671	0.3987	0.2918	74.6144
1	1279.5	10.6554	4.10195	0.124898	0.50948	0.2964	82.8772
1	858.5	38.3372	4.83708	0.083802	0.405702	0.264264	79.2455
1	926	41.0524	4.95485	0.0903909	0.451613	0.268406	65.5609
1	930	36.776	4.87683	0.0907814	0.441936	0.270736	73.3953
1	1018	28.5688	4.49316	0.0993715	0.445835	0.291054	73.8674
1	819	35.7334	4.99506	0.0799462	0.400896	0.27456	60.9819
1	1135.5	41.4341	4.16419	0.110841	0.457877	0.321193	77.3063
1	1247	51.2696	4.25721	0.121725	0.517896	0.327157	74.3839
1	1033.5	22.7226	4.76157	0.100884	0.480026	0.27571	61.4213
1	1122.5	65.9812	4.50026	0.109572	0.487632	0.30168	53.4496
1	1045	21.6448	4.45126	0.102007	0.453994	0.29416	81.1337
1	1073	22.314	4.50941	0.10474	0.473702	0.278094	68.2339
1	1416.5	29.7285	3.90135	0.138271	0.539357	0.323799	72.7408
1	1036.5	51.9574	4.98684	0.101177	0.502069	0.287754	49.404
1	899	47.8795	5.13563	0.0877553	0.45662	0.270224	69.0622
1	1709.5	29.4774	3.64925	0.166872	0.603461	0.367584	79.3525
1	987	11.81	4.40459	0.0963454	0.418192	0.285318	57.5605
1	1122	53.5757	4.37565	0.109523	0.475473	0.294798	65.321
1	1119.5	43.1677	4.19442	0.109279	0.453543	0.316463	70.5241
1	995.5	42.2809	4.48522	0.0971751	0.433065	0.296811	71.9863
1	1083.5	43.2308	4.6423	0.105765	0.493609	0.275843	78.4197
1	1087	28.7463	4.4123	0.106107	0.469258	0.281049	79.9266
1	921.5	25.0351	4.86718	0.0899517	0.43858	0.274788	74.9754
1	1603.5	30.0313	3.85002	0.156525	0.600932	0.338675	75.3763
1	870	7.38019	4.9093	0.0849245	0.416961	0.247206	85.1851
1	1103.5	26.1899	4.32577	0.107717	0.462107	0.285393	78.3785
1	1302.5	27.877	4.08717	0.127143	0.51926	0.306579	85.3255
1	1847.5	44.5783	3.78902	0.180343	0.680555	0.313091	77.1601
1	1230.5	36.538	3.87859	0.120115	0.458567	0.330881	62.2161
1	956	22.8225	5.12906	0.0933194	0.472043	0.254613	69.1057
1	987.5	17.3641	4.55405	0.0963942	0.440679	0.280024	80.3976
1	744.5	30.0157	5.69959	0.0726739	0.420527	0.251217	58.3611
1	1201	25.3696	4.08005	0.117235	0.478196	0.30881	53.4313
1	939.5	41.5588	4.94865	0.0917087	0.454235	0.24728	82.1886
1	807.5	19.2453	5.8397	0.0788236	0.462699	0.23691	77.5246
1	1062.5	34.0038	4.20896	0.103715	0.43208	0.289567	64.6073
1	1079	44.3441	4.43114	0.105326	0.465533	0.304852	63.7048
1	1074.5	51.1334	4.34688	0.104887	0.453351	0.279216	79.4717
1	1162	13.959	4.40765	0.113428	0.500208	0.296205	75.9092
1	1072.5	23.1875	4.71502	0.104691	0.493819	0.272911	63.5119
1	956	33.0122	4.50242	0.0933194	0.419088	0.29125	48.2171
1	895.5	46.3552	5.05203	0.0874137	0.442563	0.270931	56.2715
1	1176.5	22.2861	4.37949	0.114843	0.501668	0.302182	78.9095
1	927	29.718	4.75215	0.0904885	0.424338	0.25857	83.0631
1	945	9.21345	4.85756	0.0922456	0.451277	0.282055	83.6789
1	1030.5	20.3625	4.66529	0.100592	0.457937	0.274421	69.9314
1	1145	73.9857	4.46207	0.111768	0.498983	0.306837	75.5995
1	1319	44.3488	3.91607	0.128753	0.501724	0.322558	59.2929
1	1463	64.1363	3.90112	0.14281	0.558222	0.319916	88.8908
1	952	30.4984	5.11246	0.0929289	0.473243	0.268584	72.0636
1	1077.5	21.6116	4.28152	0.10518	0.449106	0.28955	60.3691
1	1067.5	35.0828	4.63032	0.104203	0.486121	0.296725	65.7122
1	1316	33.172	4.02808	0.128461	0.515497	0.308907	80.8756

## Sheet: pif4_ hAT_ B
Predicate	Pixel count	SSE	LS Ratio	Surface	Length	Width	Axes angle
1	907.5	9.3363	4.87358	0.0885851	0.42767	0.274567	78.2703
1	1051	22.2957	4.7355	0.102593	0.492681	0.285835	76.8598
1	739.5	25.0124	5.40878	0.0721858	0.389731	0.240975	82.9448
1	840	17.1604	5.5563	0.0819961	0.455217	0.272009	81.5387
1	1135.5	61.7591	4.05764	0.110841	0.449266	0.326908	72.1951
1	999.5	37.9561	4.90401	0.0975656	0.479592	0.283209	63.8956
1	790.5	22.7382	5.32558	0.0771642	0.411023	0.267355	62.5409
1	764	11.0039	5.32703	0.0745774	0.397323	0.243115	78.4149
1	903.5	32.5217	5.30005	0.0881946	0.471843	0.262322	58.3408
1	836.5	25.1712	5.10946	0.0816544	0.41634	0.262609	73.3028
1	754	20.2135	5.82159	0.0736013	0.424455	0.276992	66.2813
1	1120.5	22.8464	4.60545	0.109377	0.505194	0.27845	84.761
1	754.5	48.4928	6.56825	0.0736501	0.481773	0.196164	75.5091
1	931	30.2298	5.18815	0.090879	0.466147	0.245321	83.5856
1	1241	41.3739	3.89068	0.121139	0.469418	0.331254	72.2312
1	1120	27.1647	5.0095	0.109328	0.55685	0.319661	62.3663
1	728.5	32.2692	5.53289	0.0711121	0.396059	0.238023	81.0093
1	590.5	16.7395	6.60466	0.0576413	0.378901	0.200784	87.106
1	792	14.8079	4.99473	0.0773106	0.385778	0.258084	78.5232
1	918.5	7.52291	4.89111	0.0896588	0.440121	0.291547	60.1139
1	1093.5	35.8169	4.95757	0.106741	0.528288	0.256459	77.5287
1	849.5	17.2831	4.89368	0.0829234	0.405526	0.284476	70.4156
1	1186.5	19.7992	4.28097	0.115819	0.495322	0.287723	69.7185
1	1035.5	25.3488	4.39055	0.10108	0.444959	0.274139	88.0024
1	892	29.9017	5.13489	0.087072	0.450258	0.254109	80.4799
1	664	25.824	5.71916	0.064816	0.37901	0.228191	65.9545
1	1046	15.3765	5.47756	0.102105	0.569241	0.286251	54.4329
1	703	31.3019	6.27836	0.0686229	0.433054	0.273891	79.4304
1	864.5	13.0898	4.91024	0.0843876	0.414148	0.269119	75.6454
1	722.5	18.6196	5.26801	0.0705264	0.373208	0.264334	74.4428
1	1197.5	49.2709	4.21599	0.116893	0.494881	0.314973	54.7272
1	1222.5	29.6556	4.07439	0.119334	0.485768	0.335101	71.7202
1	665	8.94906	5.56393	0.0649136	0.359285	0.231695	62.2116
1	993.5	14.6766	4.10271	0.0969799	0.397918	0.303069	75.2776
1	1647.5	40.4591	4.2533	0.16082	0.685096	0.304953	77.9446
1	846.5	15.3346	5.05238	0.0826306	0.419829	0.275505	60.7233
1	850.5	41.1596	4.60685	0.083021	0.382897	0.28686	46.6487
1	1520.5	50.1646	4.13756	0.148423	0.617041	0.307148	78.896
1	764	22.2618	5.26149	0.0745774	0.39564	0.246779	74.8046
1	606.5	16.3494	6.50913	0.0592031	0.393078	0.2063	84.9328
1	624	20.3652	5.81103	0.0609114	0.356846	0.240171	70.5287
1	681.5	9.27873	6.01152	0.0665242	0.399495	0.234702	73.9651
1	781	22.8335	5.50527	0.0762368	0.425888	0.252758	75.1543
1	728.5	27.7856	5.86006	0.0711121	0.416779	0.245985	73.1295
1	776	15.2711	5.3759	0.0757488	0.404301	0.257543	77.74
1	936.5	26.4045	4.74154	0.0914159	0.43966	0.304865	33.9203
1	876.5	24.0334	4.55167	0.085559	0.387186	0.278447	49.2439
1	726	14.4617	5.49855	0.0708681	0.392506	0.243944	50.8065
1	933	16.5036	5.00716	0.0910742	0.455962	0.268126	71.4455
1	786	17.534	5.57778	0.0767249	0.425727	0.264872	85.6749
1	1068	35.7676	4.652	0.104252	0.485438	0.304499	76.3141
1	818	44.4628	5.2369	0.0798486	0.416421	0.247035	81.417
1	756.5	12.5899	5.5192	0.0738453	0.40377	0.25175	63.3371
1	1018	13.3374	4.76462	0.0993715	0.475403	0.279847	67.6756
1	758	17.1289	5.99091	0.0739917	0.4399	0.249996	62.8907
1	981.5	35.0066	4.3653	0.0958085	0.417899	0.27478	74.1979
1	676.5	24.112	6.30891	0.0660361	0.418505	0.243479	80.856
1	813.5	16.8324	5.61346	0.0794093	0.445257	0.269002	74.3165
1	811.5	22.5864	5.50967	0.0792141	0.436689	0.252891	72.0016
1	1347.5	21.7294	4.20374	0.131535	0.55224	0.292835	87.0241
1	696	20.5353	6.22288	0.0679396	0.423025	0.24266	67.7715
1	784	25.5174	5.79672	0.0765297	0.437671	0.272998	67.3265
1	950.5	38.159	4.64705	0.0927825	0.435387	0.282527	68.9204
1	1072	42.5393	4.6953	0.104643	0.493451	0.272539	70.276
1	829.5	21.2331	5.02934	0.0809711	0.407594	0.2663	73.2271
1	830.5	27.9328	5.3564	0.0810688	0.4332	0.254013	74.2121
1	984.5	64.366	4.56845	0.0961014	0.438473	0.294299	62.7688
1	714.5	23.2258	5.52087	0.0697455	0.387588	0.222075	77.0375
1	789.5	25.5122	5.55405	0.0770666	0.43024	0.276989	75.3287
1	967.5	30.0493	5.60071	0.0944419	0.52168	0.288034	75.6703
1	1360.5	72.5254	5.07581	0.132804	0.675268	0.274716	58.5743
1	822.5	17.9632	5.10735	0.0802878	0.411578	0.267282	80.0552
1	1159.5	32.5534	4.35	0.113184	0.49216	0.285031	78.2507
1	852	13.3256	4.92358	0.0831675	0.410485	0.290711	72.9798
1	1239.5	31.6699	4.88423	0.120993	0.580455	0.278436	63.5046
1	556.5	12.0928	6.14176	0.0543224	0.334695	0.185821	58.8064
1	1104.5	35.1245	4.0104	0.107815	0.433893	0.295428	48.1391
1	710.5	14.4775	5.70371	0.069355	0.398276	0.227286	75.4062
1	862.5	20.2823	5.02569	0.0841924	0.423832	0.271822	72.2041
1	974.5	10.8039	4.45142	0.0951252	0.422275	0.29425	77.3554
1	781	24.7847	5.43231	0.0762368	0.418043	0.27044	74.4615
1	808	8.646	5.05663	0.0788724	0.40207	0.264539	73.6455
1	643	16.9586	5.64633	0.0627661	0.355881	0.244976	61.7607
1	881.5	28.1945	5.17254	0.0860471	0.444017	0.259448	76.336
1	903.5	11.7301	4.82347	0.0881946	0.424091	0.284137	80.3566
1	880	18.1103	5.07406	0.0859007	0.439924	0.277495	84.0979
1	860	25.2234	5.17597	0.0839484	0.435013	0.258545	58.9781
1	1297	58.1116	3.68711	0.126606	0.466718	0.351878	53.2464
1	711.5	36.0085	5.72927	0.0694526	0.397581	0.244397	69.281
1	654	5.48355	5.87178	0.0638398	0.375669	0.221474	79.4331
1	808	14.668	5.01933	0.0788724	0.394937	0.276476	83.5665
1	888.5	24.3732	5.04287	0.0867304	0.437005	0.250044	86.0104
1	754	14.7112	5.29917	0.0736013	0.389494	0.249559	72.8098
1	702.5	44.5644	5.86279	0.0685741	0.407533	0.239774	67.8201
1	1107.5	18.0313	4.50368	0.108108	0.487342	0.30755	62.1405
1	1160	11.523	4.90121	0.113233	0.555387	0.28375	65.6207
1	645.5	14.3054	6.16943	0.0630101	0.382145	0.231886	80.623
1	1025.5	40.2566	4.58275	0.100104	0.458131	0.29146	69.2055
1	789.5	22.898	5.5036	0.0770666	0.422107	0.262764	80.497
1	837	31.5715	5.29161	0.0817033	0.435532	0.262995	67.118
1	798	33.667	5.16208	0.0778963	0.408949	0.247395	55.4324
1	1060.5	23.2208	4.57139	0.10352	0.473351	0.26524	76.6106
1	909	22.5815	5.04421	0.0887315	0.439092	0.279064	79.2649
1	887.5	37.2185	4.69374	0.0866328	0.408781	0.281349	53.6816
1	706	26.5979	5.29315	0.0689158	0.36698	0.27763	28.2148
1	1291.5	51.8454	4.41615	0.126069	0.556794	0.301253	78.89
1	959.5	40.59	4.64661	0.093661	0.435539	0.271015	47.264
1	753.5	30.4379	5.46163	0.0735524	0.403457	0.238556	69.8162
1	949	46.3873	4.98588	0.0926361	0.462332	0.26163	84.7095
1	1059.5	45.5286	4.38258	0.103422	0.453895	0.310173	79.129
1	870	26.3203	4.9614	0.0849245	0.420193	0.258306	78.8785
1	1094	28.7015	4.72137	0.10679	0.500142	0.306226	88.0223
1	713	30.5836	6.10794	0.0695991	0.423383	0.29254	61.3242
1	918	26.5994	5.16893	0.08961	0.459622	0.286878	81.6113
1	916.5	39.0042	5.58137	0.0894636	0.50166	0.267141	70.8888
1	764	20.5053	5.29248	0.0745774	0.395701	0.25886	68.1802
1	1274.5	64.7109	5.10174	0.12441	0.635131	0.274474	64.7707
1	711.5	45.9723	5.9926	0.0694526	0.419997	0.261208	78.7311
1	669	12.9485	5.81909	0.065304	0.380715	0.221474	80.6516
1	820.5	25.0036	5.1056	0.0800926	0.412693	0.264265	72.8973
1	957.5	20.6061	4.58569	0.0934658	0.413777	0.277175	46.1687
1	1007.5	17.5036	4.55596	0.0983465	0.4543	0.276102	85.2073
1	1108.5	74.2526	4.26675	0.108206	0.46348	0.309111	50.775
1	940.5	21.8624	5.06811	0.0918063	0.463494	0.260866	84.2099
1	1158	43.3156	4.21351	0.113037	0.477387	0.306226	79.3332
1	851	17.5162	4.79844	0.0830699	0.398307	0.269555	81.4196
1	766.5	19.0657	5.0818	0.0748214	0.379379	0.249653	85.7054
1	1234.5	69.3553	5.06552	0.120505	0.612278	0.303856	72.8964
1	865	25.9706	4.78517	0.0844365	0.406247	0.278836	63.0518
1	753	9.95182	5.51999	0.0735036	0.408241	0.241562	71.4391
1	1082	26.9708	4.65361	0.105619	0.483238	0.279383	79.2573
1	1058	21.4435	4.15345	0.103276	0.428553	0.284428	68.8515
1	800	28.8627	5.36279	0.0780915	0.417111	0.260994	65.6041
1	761	26.9067	5.1669	0.0742846	0.384818	0.245978	78.092
1	1069.5	15.8922	4.68557	0.104399	0.488983	0.2717	75.7937
1	892.5	24.9505	5.15794	0.0871209	0.443225	0.268216	73.3683
1	936.5	15.7576	4.66306	0.0914159	0.426336	0.285312	83.4978
1	838.5	63.5529	5.06579	0.0818497	0.414498	0.25571	67.9782
1	867	22.4359	5.29696	0.0846317	0.452711	0.261454	72.7457
1	1000	34.9492	4.55332	0.0976144	0.437881	0.274745	74.352
1	746	27.806	5.56288	0.0728203	0.406075	0.239319	71.2857
1	1004	39.2253	4.82297	0.0980049	0.472566	0.28351	76.4784
1	1154.5	36.6862	4.2809	0.112696	0.481544	0.306424	73.8811
1	1005.5	38.1056	4.93038	0.0981513	0.480874	0.289967	78.9944
1	970	32.4593	4.91294	0.094686	0.464049	0.26876	58.2972
1	1288	49.4164	4.51699	0.125727	0.565623	0.314317	57.8903
1	1005.5	58.4788	4.64175	0.0981513	0.453548	0.260745	63.4025
1	778.5	21.1227	5.59415	0.0759928	0.424956	0.258	83.8662
1	1000	54.7678	5.05186	0.0976144	0.493142	0.273494	70.6819
1	625.5	22.5971	6.05193	0.0610578	0.36978	0.234157	52.8241
1	907.5	47.233	5.00225	0.0885851	0.44512	0.284347	76.1983
1	827.5	15.7096	5.39455	0.0807759	0.434552	0.275076	69.3801
1	751.5	36.8678	5.52091	0.0733572	0.405408	0.252078	84.8476
1	924	42.7723	4.55771	0.0901957	0.411277	0.28693	70.148
1	1132.5	27.2001	4.55534	0.110548	0.503077	0.291674	73.6385
1	821	43.7239	5.47637	0.0801414	0.435002	0.274861	69.128
1	950	41.6707	4.71779	0.0927337	0.434094	0.272253	68.4407
1	1088.5	31.2076	4.57646	0.106253	0.484391	0.284834	83.9124
1	974.5	14.2328	4.66869	0.0951252	0.444891	0.271373	79.8242
1	622	34.8147	6.11785	0.0607162	0.372697	0.228595	59.3431
1	812	27.0643	5.22906	0.0792629	0.416105	0.251935	76.9882
1	865	35.9045	4.80758	0.0844365	0.401484	0.267919	72.6388
1	969.5	26.4327	4.79091	0.0946372	0.460066	0.292826	71.6044
1	1162.5	63.9111	5.91339	0.113477	0.674194	0.248263	62.4142
1	781	56.4563	6.06863	0.0762368	0.459446	0.248431	59.5438
1	826	58.1685	5.48645	0.0806295	0.445286	0.280986	56.9675
1	738.5	42.1197	5.64895	0.0720882	0.41037	0.248635	83.5453
1	831	25.1436	5.57816	0.0811176	0.452191	0.26997	77.1042
1	797.5	11.5972	5.24784	0.0778475	0.410233	0.260717	63.9829
1	872	64.8143	6.15932	0.0851198	0.526273	0.244909	74.2669
1	879.5	25.3899	4.90554	0.0858519	0.416994	0.274557	63.9566
1	1030.5	13.6792	4.46948	0.100592	0.449583	0.277405	61.4996
1	881.5	62.0879	5.16385	0.0860471	0.447442	0.290609	66.2552
1	639	19.4911	5.69691	0.0623756	0.358223	0.227866	63.8666
1	770	50.4473	5.65561	0.0751631	0.428445	0.225434	66.2447
1	755	8.74861	5.66447	0.0736989	0.417626	0.239345	71.6667
1	750	22.9913	5.57141	0.0732108	0.406483	0.232591	78.8064
1	811.5	27.8831	5.22856	0.0792141	0.414095	0.276154	69.896
1	694	62.9466	6.02542	0.0677444	0.413075	0.236544	76.0959
1	840	16.179	5.32428	0.0819961	0.436022	0.225098	83.2985
1	1269.5	38.3425	3.99426	0.123921	0.486487	0.332453	63.0178
1	882.5	24.1396	5.31934	0.0861447	0.462641	0.261454	68.0816
1	924	14.1587	4.9315	0.0901957	0.444653	0.280642	67.732
1	747	12.1395	5.00197	0.072918	0.360896	0.268511	63.1169
1	925	59.1636	4.80642	0.0902933	0.4348	0.269016	66.0186
1	678.5	60.85	6.07692	0.0662314	0.402368	0.238595	76.8002
1	984.5	35.5669	4.55453	0.0961014	0.43172	0.283024	64.8961
1	791.5	8.57616	5.24901	0.0772618	0.407675	0.254196	82.5092
1	966.5	26.125	4.93914	0.0943443	0.465613	0.277327	60.3568
1	788.5	16.9139	5.30511	0.076969	0.41175	0.270962	80.2379
1	755	17.427	5.41534	0.0736989	0.398338	0.24779	75.5139
1	1291.5	30.7196	4.41243	0.126069	0.546329	0.278541	81.4561
1	1074.5	19.6721	4.28907	0.104887	0.45175	0.303995	62.9031
1	1184.5	44.8861	4.7492	0.115624	0.543116	0.290665	74.4787
1	905	31.9746	5.12072	0.088341	0.445818	0.263202	68.0545
1	712	23.6719	4.98387	0.0695015	0.349234	0.255154	45.4688
1	805	44.9014	5.13555	0.0785796	0.403217	0.247304	80.28
1	1025.5	26.2736	4.25777	0.100104	0.427021	0.316861	72.4903
1	666.5	13.8542	5.75716	0.06506	0.376178	0.237942	59.6657
1	847	13.1832	5.12292	0.0826794	0.423709	0.265476	76.0392
1	847.5	17.0737	5.04573	0.0827282	0.415344	0.245586	74.2151
1	907.5	21.1518	4.57652	0.0885851	0.405764	0.287273	77.0657
1	781	34.1552	5.67069	0.0762368	0.431734	0.242204	88.4813
1	795	20.509	5.4016	0.0776034	0.420114	0.266827	85.2294
1	1000.5	60.69	4.79951	0.0976632	0.468877	0.2913	78.5974
1	904	21.1077	4.56111	0.0882434	0.404465	0.293055	81.7478
1	899	55.0024	4.89754	0.0877553	0.427731	0.28221	70.5859
1	1026.5	23.4968	4.67871	0.100201	0.467258	0.280099	78.9756
1	904	24.5749	4.55278	0.0882434	0.398886	0.277128	77.8799
1	852.5	14.6106	5.37277	0.0832163	0.445365	0.275393	85.1851
1	1023	68.0879	5.02543	0.0998595	0.501434	0.29828	71.4694
1	908.5	55.5934	4.78514	0.0886827	0.421081	0.264243	48.6095
1	821	20.2043	5.42508	0.0801414	0.433745	0.237515	72.2683
1	774	30.4169	5.18331	0.0755535	0.391541	0.265453	67.38
1	1053.5	14.6496	4.48436	0.102837	0.46069	0.298795	54.5659
1	743.5	29.5427	5.91568	0.0725763	0.422106	0.255421	76.3974
1	898	16.9875	4.90224	0.0876577	0.427349	0.261586	87.7178
1	1040.5	25.8075	4.69756	0.101568	0.47713	0.267849	60.9978
1	854.5	17.5887	5.59515	0.0834115	0.466196	0.256405	69.2869
1	1082.5	26.0899	4.97803	0.105668	0.519482	0.276096	79.4092
1	777.5	17.7239	5.22129	0.0758952	0.399876	0.265283	50.0839
1	878.5	11.27	5.24013	0.0857543	0.449649	0.2699	69.8535
1	1113	33.3637	4.05784	0.108645	0.435605	0.306878	64.7414
1	776.5	21.534	5.57816	0.0757976	0.422887	0.247637	75.3088
1	859.5	68.395	5.01385	0.0838996	0.419088	0.274808	69.0899
1	804.5	16.0216	5.68708	0.0785308	0.447173	0.271822	75.0946
1	667	34.6401	5.83723	0.0651088	0.38531	0.242396	52.4728
1	880	18.6315	5.19366	0.0859007	0.445463	0.277048	80.4424
1	1252	50.5575	4.65537	0.122213	0.568947	0.31193	83.6564
1	1027.5	37.8629	4.48346	0.100299	0.452207	0.296407	62.7924
1	772.5	15.7088	5.03325	0.0754071	0.379154	0.256095	63.2359
1	986.5	37.1607	5.00894	0.0962966	0.482674	0.223934	85.8023
1	774.5	15.3098	5.34684	0.0756024	0.407968	0.26062	51.6813
1	998.5	53.0597	4.44877	0.097468	0.42857	0.286053	72.1214
1	864	36.4573	5.03662	0.0843388	0.42025	0.273175	40.7042
1	856	23.9885	5.03992	0.0835579	0.421275	0.275156	65.6908
1	693	13.6556	6.23811	0.0676468	0.424236	0.224863	70.9299
1	793.5	22.9889	5.0517	0.077457	0.39058	0.260021	81.7132
1	769.5	14.1907	5.60915	0.0751143	0.420857	0.226698	74.7127
1	1171.5	14.2337	4.81014	0.114355	0.54509	0.299094	51.7512
1	972	31.9694	4.74861	0.0948812	0.451303	0.290634	73.288
1	891	25.8271	4.60124	0.0869744	0.400361	0.282742	75.2627
1	738	27.4703	5.66049	0.0720394	0.409876	0.231886	70.5398
1	860	35.4825	5.20334	0.0839484	0.437592	0.275929	36.5438
1	789	11.2471	5.29623	0.0770178	0.408827	0.26596	72.4872
1	709.5	20.6579	5.89567	0.0692574	0.408894	0.237719	81.9891
1	607.5	11.9097	5.98537	0.0593007	0.355938	0.213612	68.7914
1	1186.5	35.5061	4.15963	0.115819	0.478443	0.318952	65.8739
1	743.5	9.55978	5.55409	0.0725763	0.403182	0.243948	68.3098
1	992	19.5392	4.50257	0.0968335	0.43061	0.282742	75.9669
1	864	27.9093	4.6062	0.0843388	0.388159	0.301908	52.2223
1	829.5	42.6669	5.52071	0.0809711	0.451823	0.255334	77.2003
1	1050.5	17.4652	4.15636	0.102544	0.426204	0.315937	68.904
1	864	14.64	5.25508	0.0843388	0.44324	0.287879	70.4517
1	962.5	11.767	4.94116	0.0939539	0.458476	0.258624	78.8205
1	686	79.2954	6.45124	0.0669635	0.413797	0.213649	51.7326
1	713	14.1839	5.62309	0.0695991	0.393783	0.247915	80.6949
1	1238	67.3799	5.02679	0.120847	0.607581	0.254314	71.1795
1	632.5	8.61584	6.05328	0.0617411	0.373781	0.22377	69.5119
1	1136.5	25.7503	4.33842	0.110939	0.485038	0.322629	76.9479
1	1001	31.5533	4.88611	0.097712	0.47144	0.288623	66.4091
1	567.5	9.59779	6.26542	0.0553962	0.347088	0.230968	50.2695
1	1096	43.5032	4.68651	0.106985	0.502011	0.287385	78.482
1	553	10.7943	5.87028	0.0539808	0.316667	0.224005	81.5015
1	808	24.3649	5.33388	0.0788724	0.421262	0.239677	87.3259
1	788.5	10.9083	5.3727	0.076969	0.416115	0.259239	70.8189
1	745.5	22.0652	5.63105	0.0727715	0.411124	0.252496	63.268
1	759	18.6852	5.3939	0.0740893	0.399494	0.239484	38.8139
1	1079	12.9107	4.70134	0.105326	0.496496	0.275347	81.9632
1	1106	15.6305	4.64624	0.107962	0.500937	0.288424	66.6169
1	912.5	42.1745	4.89644	0.0890731	0.434638	0.266295	75.4664
1	837.5	34.1384	5.51272	0.0817521	0.451024	0.276382	73.8447
1	825	16.263	5.53125	0.0805319	0.442758	0.251779	79.7208
1	1100.5	34.1064	4.31462	0.107425	0.463503	0.3206	54.3451
1	952	20.3912	4.99456	0.0929289	0.465794	0.283153	82.8984
1	972.5	58.2106	4.48441	0.09493	0.419607	0.306227	41.4926
1	1026	24.5473	4.47719	0.100152	0.445943	0.284988	44.4854
1	837	25.9463	5.17896	0.0817032	0.424392	0.263312	70.7357
1	892	21.8976	5.21016	0.087072	0.456047	0.276935	80.5411
1	1301	21.4363	4.01619	0.126996	0.508119	0.296607	77.7511
1	899.5	54.9794	5.08416	0.0878042	0.444634	0.2255	66.7845
1	736	23.024	5.44651	0.0718442	0.395966	0.262199	56.4942
1	741	11.5237	5.77993	0.0723323	0.417023	0.261833	77.6273
1	1090	25.8558	4.74986	0.1064	0.505045	0.293641	69.3918
1	748.5	35.0455	6.00451	0.0730644	0.437902	0.269701	61.7604
1	809.5	19.8183	5.11641	0.0790189	0.402953	0.235687	70.5136
1	940	9.33243	4.45955	0.0917575	0.406477	0.286464	77.8982
1	1167.5	39.6678	4.2296	0.113965	0.482867	0.314766	56.0497
1	1028	21.0293	5.71199	0.100348	0.565284	0.260757	75.641
1	1141.5	10.8595	4.19078	0.111427	0.466543	0.288423	72.6367
1	1167	37.3904	4.3153	0.113916	0.491642	0.280658	73.6831
1	965.5	15.9851	4.69968	0.0942467	0.438974	0.246405	79.2459
1	872	24.0602	4.86593	0.0851198	0.415974	0.259613	67.1888
1	1113.5	28.6803	4.48582	0.108694	0.486931	0.27432	87.635
1	1209.5	27.7938	4.01973	0.118065	0.472769	0.28742	79.6344
1	725.5	9.67836	5.66506	0.0708192	0.406974	0.260908	43.7018
1	715	21.9054	5.76492	0.0697943	0.40223	0.227232	65.2199
1	1101	17.744	5.6018	0.107473	0.60203	0.261929	65.6826
1	991.5	16.0832	4.63783	0.0967847	0.448195	0.297836	42.5488
1	700.5	19.5015	5.34523	0.0683789	0.361058	0.231415	62.309
1	1227	33.6165	4.01469	0.119773	0.481977	0.332666	60.8536
1	827	20.7286	4.86651	0.0807271	0.393034	0.270753	69.2901
1	870.5	21.9462	5.39104	0.0849733	0.45675	0.26976	62.8051
1	649.5	20.5454	6.02162	0.0634006	0.382956	0.234875	69.4812
1	809	44.128	5.36404	0.0789701	0.425591	0.255432	67.8558
1	1140.5	50.154	4.18315	0.111329	0.464304	0.292602	63.5159
1	987.5	72.0441	4.4835	0.0963942	0.430736	0.30662	67.6345
1	800.5	16.2214	5.21676	0.0781403	0.410157	0.250044	72.839
1	763	21.7397	5.52622	0.0744798	0.415053	0.248691	69.2411
1	1011.5	14.3479	4.84374	0.098737	0.476598	0.279756	78.955
1	903.5	27.772	4.82616	0.0881946	0.424728	0.276614	70.2319
1	1086	28.0106	4.82914	0.106009	0.513663	0.298444	66.6929
1	940.5	19.0393	4.51659	0.0918063	0.411998	0.276325	84.3607
1	1001	21.8093	4.62914	0.097712	0.455769	0.286435	84.4527
1	808	32.7301	5.18977	0.0788724	0.410233	0.254747	71.3149
1	867	14.9391	5.31317	0.0846317	0.450743	0.247206	75.6714
1	651	21.2102	5.87736	0.063547	0.378162	0.255818	65.0669
1	696.5	18.1302	5.3379	0.0679884	0.368603	0.245169	85.0363
1	791	34.4775	5.21991	0.077213	0.404804	0.267147	76.1967
1	715	14.7836	5.4851	0.0697943	0.375916	0.245298	63.3175
1	885	27.2222	5.25283	0.0863887	0.455049	0.266789	82.6848
1	1248	28.4935	4.05851	0.121823	0.493453	0.301992	66.5637
1	808	39.9977	6.11975	0.0788724	0.484527	0.28258	64.5841
1	1151.5	26.3165	4.27513	0.112403	0.479605	0.325214	63.9937
1	1357	35.3158	3.92969	0.132463	0.520589	0.324699	66.0688
1	1221	15.454	4.01361	0.119187	0.478904	0.298974	82.0084
1	853.5	17.0324	4.84545	0.0833139	0.403556	0.26494	59.0345
1	925	50.9696	5.25755	0.0902933	0.484927	0.258959	86.1032
1	1015.5	18.682	4.70197	0.0991274	0.465236	0.274972	77.261
1	1064	45.9981	4.30757	0.103862	0.442788	0.291102	71.5046
1	654.5	19.1981	6.65941	0.0638886	0.427142	0.213948	78.0469
1	1045	43.7337	4.66482	0.102007	0.475513	0.309389	57.6088
1	875.5	29.808	5.25793	0.0854614	0.443934	0.278993	59.042
1	775	9.0771	5.25362	0.0756512	0.397887	0.242506	77.2683
1	1069	36.3476	4.64302	0.10435	0.481176	0.304654	70.6324
1	662	32.2265	6.36602	0.0646207	0.41503	0.209212	71.7083
1	866.5	21.3978	4.69046	0.0845829	0.396803	0.282994	64.9125
1	1153.5	24.0166	4.22802	0.112598	0.47918	0.322791	87.3252
1	862	16.72	4.94884	0.0841436	0.416716	0.292306	71.8567
1	883	12.7905	5.14172	0.0861935	0.445121	0.283825	80.9192
1	1534	44.3727	4.50455	0.14974	0.679282	0.313893	78.4621
1	1139.5	29.2346	4.62156	0.111232	0.5133	0.281945	79.9355
1	1201	10.4317	4.12655	0.117235	0.484547	0.305607	79.4266
1	895	22.0847	4.62605	0.0873649	0.403038	0.265348	65.1494
1	1149	21.2041	4.37443	0.112159	0.484739	0.291793	84.9986
1	820	16.3032	5.01698	0.0800438	0.401016	0.245308	77.0942
1	1128.5	19.4629	4.60761	0.110158	0.505244	0.314085	71.4783
1	696	9.41086	5.13068	0.0679396	0.345806	0.25194	42.1972
1	798	19.7	5.15985	0.0778963	0.401965	0.26818	73.9537
1	770.5	35.9405	5.46655	0.0752119	0.4081	0.251959	49.8355
1	735.5	30.1999	5.90385	0.0717954	0.413573	0.270263	68.4133
1	840	14.5001	4.92396	0.0819961	0.402663	0.274237	64.9721
1	938.5	35.3699	4.87297	0.0916111	0.449232	0.291174	72.2077
1	989	33.9292	4.66184	0.0965406	0.450689	0.287019	84.2499
1	1459.5	38.0834	4.5782	0.142468	0.630365	0.320339	77.7078
1	813.5	11.8973	4.92791	0.0794093	0.388498	0.274069	58.5977
1	873	22.2907	5.086	0.0852174	0.434851	0.28851	55.5585
1	807.5	11.2373	4.80629	0.0788236	0.378874	0.252953	64.9424
1	760.5	16.6818	5.69146	0.0742358	0.422131	0.271781	85.2084
1	845.5	21.4801	4.96384	0.082533	0.41856	0.287615	38.3911
1	862.5	41.1125	5.11993	0.0841924	0.436961	0.257069	80.5983
1	805.5	24.1912	5.19868	0.0786284	0.401645	0.249537	59.3037
1	802	22.563	5.22954	0.0782867	0.40933	0.262612	71.5047
1	877.5	16.5718	4.96489	0.0856566	0.425972	0.269475	75.932
1	1148	29.3697	4.64385	0.112061	0.514722	0.280736	78.9302
1	713	4.92306	5.73833	0.0695991	0.40101	0.21837	80.0231
1	1161	21.5386	4.41658	0.11333	0.502545	0.296168	65.7423
1	937	21.146	5.07044	0.0914647	0.461597	0.277038	65.0075
1	808.5	18.0976	5.33376	0.0789212	0.4199	0.2554	54.7638
1	984	30.1561	4.96046	0.0960526	0.47293	0.272559	78.047
1	1055	10.6204	4.27521	0.102983	0.440743	0.308211	83.7735
1	616	10.4351	6.21356	0.0601305	0.37746	0.216683	71.2967
1	1205	13.1022	4.09011	0.117625	0.48128	0.307128	84.034
1	593.5	9.86454	6.42679	0.0579341	0.375805	0.21104	58.1353
1	765	24.8143	5.40816	0.074675	0.403858	0.247936	63.7357
1	841	34.5511	4.74475	0.0820937	0.388282	0.277091	67.52
1	966	9.85539	4.92226	0.0942955	0.464293	0.280907	67.508
1	794	24.9704	5.41762	0.0775058	0.41803	0.235687	78.0213
1	880	12.8288	4.95665	0.0859007	0.424374	0.270004	74.9023
1	997.5	55.7229	4.63255	0.0973704	0.451047	0.282742	71.9614
1	723.5	20.4092	5.44462	0.070624	0.386536	0.282844	37.8444
1	940.5	24.2584	4.74134	0.0918063	0.435497	0.280345	69.7451
1	1160.5	19.7981	4.39773	0.113282	0.497112	0.287756	80.2514
1	916	18.1992	5.07418	0.0894148	0.453432	0.279533	76.5732
1	915.5	22.92	4.56631	0.089366	0.408638	0.290901	79.5982
1	874	25.389	5.2324	0.085315	0.446321	0.25389	71.4893
1	1137.5	38.265	4.41571	0.111036	0.491739	0.284664	73.5049
1	1117	40.2108	4.44398	0.109035	0.483017	0.29696	56.5426
1	991	33.6572	4.88907	0.0967359	0.473545	0.264539	76.9337
1	1074.5	32.5886	4.8519	0.104887	0.508605	0.278096	76.6337
1	979.5	22.9383	4.6087	0.0956133	0.442273	0.26497	83.137
1	869	24.1706	5.24014	0.0848269	0.441514	0.287164	76.5752
1	884.5	31.3091	5.18632	0.0863399	0.45107	0.255486	77.9272
1	965.5	20.0742	4.56446	0.0942467	0.429853	0.258435	55.5913
1	1400.5	40.2044	4.39268	0.136709	0.597608	0.327462	77.9171
1	728	16.8846	5.56129	0.0710633	0.397386	0.24896	79.864
1	1076	39.6775	4.3524	0.105033	0.45384	0.280166	62.9427
1	969.5	33.8323	5.00269	0.0946372	0.476048	0.270271	73.6398
1	854	52.4624	4.93388	0.0833627	0.411214	0.260711	74.9936
1	1151	20.1365	4.23503	0.112354	0.476565	0.293667	79.4959
1	1202.5	8.66807	4.24729	0.117381	0.496513	0.273056	83.571
1	996.5	24.8854	4.8696	0.0972727	0.482086	0.28042	83.4042
1	1066.5	86.9293	4.94727	0.104106	0.516631	0.294766	68.1094
1	729	22.1856	5.1741	0.0711609	0.366676	0.278707	68.8368
1	740.5	48.3822	5.25145	0.0722835	0.381471	0.257919	75.1215
1	757	13.1961	5.27139	0.0738941	0.38845	0.272674	87.6848
1	861.5	14.6291	5.22849	0.0840948	0.438333	0.269393	65.621
1	1282.5	48.7196	4.27054	0.12519	0.534005	0.27934	84.7429
1	1283.5	49.1146	3.87089	0.125288	0.482689	0.29696	62.7688
1	779.5	17.8721	5.27012	0.0760904	0.398339	0.241784	66.5104
1	1119	10.6114	4.17051	0.109231	0.454588	0.284092	66.7199
1	804.5	16.647	5.72334	0.0785308	0.430028	0.259299	76.1006
1	902.5	24.7393	4.68161	0.088097	0.412629	0.287285	84.985
1	1115	35.656	4.07489	0.10884	0.444514	0.31806	51.9423
1	1198	44.5792	4.15029	0.116942	0.485328	0.29587	58.1998
1	774.5	27.1967	5.09688	0.0756024	0.386616	0.273151	68.4274
1	832.5	46.1408	5.21634	0.081264	0.422352	0.26467	81.9779
1	831.5	27.5327	5.00501	0.0811664	0.403046	0.2671	63.0898
1	849	13.1827	4.73139	0.0828746	0.391021	0.290057	61.78
1	787	12.9554	6.10421	0.0768225	0.449294	0.263397	86.7347
1	1133	50.2949	4.32419	0.110597	0.477573	0.314534	75.079
1	775	30.7262	5.66906	0.0756512	0.426389	0.261263	51.001
1	1131.5	33.5999	4.59579	0.110451	0.507712	0.28221	80.0802
1	962.5	10.8999	4.9376	0.0939539	0.464072	0.267006	64.0663
1	1061	34.0877	4.37413	0.103569	0.453021	0.309489	76.4064
1	845	5.77954	5.04497	0.0824842	0.410716	0.264404	77.2425
1	1064.5	11.4658	4.91266	0.103911	0.494649	0.281803	80.0329
1	1171	22.4737	4.53162	0.114306	0.517708	0.276869	80.8043
1	1007	9.27848	4.60856	0.0982977	0.445378	0.285933	85.2703
1	813.5	10.8898	5.10816	0.0794093	0.40776	0.261863	65.2496
1	897	20.7313	4.70612	0.0875601	0.409641	0.263006	69.7967
1	855.5	16.3493	4.66489	0.0835091	0.388309	0.268874	69.9905
1	1060	32.9301	4.3478	0.103471	0.436392	0.31134	50.9357
1	953.5	39.7078	5.11816	0.0930753	0.471823	0.282665	74.7647
1	1166	54.7013	4.43484	0.113818	0.506708	0.297985	72.0535
1	1177	20.2698	4.19422	0.114892	0.482032	0.28292	76.3518
1	607	13.4582	7.35679	0.0592519	0.437046	0.257095	58.5197
1	1024.5	18.4307	4.30531	0.100006	0.428949	0.274932	87.084
1	1001	40.9062	4.64859	0.097712	0.454589	0.234706	71.7225
1	1106	19.4983	4.59057	0.107962	0.4821	0.292363	78.6807
1	660.5	37.0076	6.1166	0.0644743	0.393757	0.226123	75.7862
1	915.5	23.1564	4.35005	0.089366	0.390167	0.295488	76.824
1	833.5	15.7726	5.05726	0.0813616	0.411255	0.263094	64.0766
1	1125	15.3987	4.27774	0.109816	0.468299	0.289774	72.5559
1	947.5	16.7485	4.96411	0.0924896	0.459968	0.262965	80.0376
1	744.5	23.3754	5.30311	0.0726739	0.383704	0.246141	81.0636
1	1107	23.0086	4.32308	0.108059	0.467456	0.288026	56.5225
1	790.5	25.272	4.99904	0.0771642	0.383621	0.265046	75.9638
1	926	32.2685	5.02527	0.0903909	0.448171	0.283681	59.3679
1	1377	54.5508	4.02025	0.134415	0.540578	0.2964	74.2138
1	848	6.72697	4.88009	0.082777	0.403355	0.244581	63.4281
1	1095	64.0894	4.30696	0.106888	0.464264	0.319462	69.8321
1	773.5	22.6854	5.91306	0.0755047	0.434813	0.234258	77.2128
1	1112	27.8671	4.50214	0.108547	0.490218	0.281463	76.5341
1	953.5	23.7005	5.09503	0.0930753	0.466281	0.264321	67.6949
1	788.5	17.7524	5.31743	0.076969	0.403091	0.266696	67.2257
1	923	15.5575	4.43139	0.0900981	0.397949	0.292964	39.8617
1	662.5	18.4134	5.74873	0.0646695	0.376245	0.229778	67.3093
1	672	11.848	6.40499	0.0655969	0.417111	0.228505	66.3971
1	748.5	12.1438	5.56809	0.0730644	0.411508	0.267771	57.9925
1	684.5	13.6359	5.64991	0.0668171	0.378342	0.234374	62.3304
1	947	36.7187	5.085	0.0924408	0.473149	0.286878	68.3752
1	688.5	14.6822	5.64459	0.0672075	0.379771	0.226104	85.8703
1	906.5	12.0044	4.7086	0.0884875	0.417498	0.282742	75.7865
1	786.5	16.0335	5.26209	0.0767737	0.403736	0.24864	59.6731
1	828	77.6425	5.04597	0.0808247	0.401281	0.222819	32.2128
1	790	11.5547	5.39496	0.0771154	0.417103	0.252541	76.9878
1	469.5	14.3472	7.44556	0.04583	0.347493	0.202822	46.2366
1	728	13.5224	5.96069	0.0710633	0.420267	0.22937	74.0274
1	1252.5	15.1685	4.6105	0.122262	0.563902	0.30591	79.8293
1	786	51.1191	5.89848	0.0767249	0.446129	0.277142	80.5967
1	1002.5	31.4769	4.70286	0.0978584	0.458502	0.252496	75.5341
1	845	16.4626	5.07206	0.0824842	0.409286	0.261548	83.9586
1	726.5	18.2565	5.53431	0.0709169	0.395848	0.256095	68.9869
1	715	11.8512	5.65042	0.0697943	0.394794	0.243279	79.7176
1	864.5	20.0777	5.22127	0.0843876	0.435578	0.275642	72.2704
1	529	47.4855	7.28957	0.051638	0.377439	0.181634	51.5757
1	751	6.97511	5.56883	0.0733084	0.408079	0.238283	76.108
1	745.5	10.1094	5.75407	0.0727715	0.423172	0.247637	84.8618
1	730.5	16.7793	5.03628	0.0713073	0.355938	0.240905	61.0278
1	933	7.12919	4.54334	0.0910742	0.41378	0.262641	84.6011
1	671.5	30.9887	5.97067	0.0655481	0.39245	0.21959	75.9546
1	852.5	8.50264	4.92646	0.0832163	0.409824	0.266198	77.0554
1	821.5	11.0322	5.22067	0.0801902	0.418189	0.25729	80.7825
1	875	39.5824	5.05086	0.0854126	0.42808	0.262231	75.1276
1	1075	27.8175	4.70111	0.104935	0.489659	0.316309	79.2761
1	882.5	12.0557	4.72308	0.0861447	0.404872	0.292129	48.1915
1	926	20.2933	4.72476	0.0903909	0.425785	0.272916	63.8261
1	1188.5	22.7153	4.15501	0.116015	0.481479	0.299017	71.4072
1	704.5	11.5402	6.0343	0.0687693	0.413197	0.233633	80.4529
1	808	14.6235	4.93602	0.0788724	0.389292	0.275067	84.5989
1	923.5	30.992	4.99704	0.0901469	0.45079	0.295574	68.3917
1	881.5	35.5185	4.95306	0.0860471	0.429688	0.291643	55.1701
1	907	15.6089	5.19218	0.0885363	0.458878	0.265283	61.7638
1	1249.5	33.8488	5.04966	0.121969	0.617309	0.258259	70.8484
1	824	26.5925	5.23933	0.0804343	0.417893	0.25392	55.8184
1	741	34.3852	5.18616	0.0723323	0.371798	0.25669	48.1269
1	852.5	13.2097	5.13374	0.0832163	0.427102	0.256366	78.6812
1	771.5	46.8788	5.62847	0.0753095	0.423407	0.24649	52.0952
1	949.5	36.4803	4.95058	0.0926849	0.464201	0.266905	60.4264
1	632	12.2004	5.98105	0.0616923	0.369194	0.241594	85.1187
1	809.5	45.4448	6.06254	0.0790189	0.477891	0.234258	75.8521
1	742	7.8978	5.72814	0.0724299	0.406296	0.253763	49.4246
1	696	15.704	6.0861	0.0679396	0.415211	0.25061	68.3679
1	963	47.9325	4.46433	0.0940027	0.420636	0.309708	75.5417
1	975	30.6465	4.73188	0.095174	0.444281	0.279463	70.1518
1	979.5	17.4913	4.41697	0.0956133	0.421378	0.298529	71.9259
1	794.5	7.74385	4.8301	0.0775546	0.376883	0.271058	81.3353
1	945.5	9.04987	4.62461	0.0922944	0.426388	0.280907	78.5091
1	1051	38.8371	4.55482	0.102593	0.466016	0.307593	78.5243
1	800	33.789	5.45198	0.0780915	0.426425	0.26655	77.503
1	946.5	34.772	5.05114	0.092392	0.463969	0.258435	70.3088
1	724.5	16.5732	5.55344	0.0707216	0.3917	0.232324	87.4583
1	851	23.9077	4.77277	0.0830699	0.398266	0.270659	76.4907
1	765	6.94376	4.75946	0.074675	0.354698	0.272054	69.5922
1	1012.5	18.2595	4.9523	0.0988346	0.487983	0.279861	52.1028
1	845	34.7113	4.95753	0.0824842	0.409099	0.242471	74.5821
1	910	40.656	4.9394	0.0888291	0.44534	0.2535	43.9136
1	1012	34.8142	4.44346	0.0987858	0.438793	0.263675	73.7177
1	839	13.9258	5.80474	0.0818985	0.455573	0.26879	77.2139
1	820.5	13.9101	5.56386	0.0800926	0.432658	0.247062	61.4496
1	840	29.9267	5.13467	0.0819961	0.420176	0.255297	85.8251
1	787	15.5983	5.4088	0.0768225	0.419157	0.243157	79.1856
1	894	39.063	4.27706	0.0872673	0.368566	0.287962	51.242
1	834	37.5886	5.00475	0.0814104	0.407927	0.255826	57.5453
1	875.5	18.9778	5.03586	0.0854614	0.429879	0.267465	75.968
1	784.5	8.52228	5.28419	0.0765785	0.406683	0.253508	76.6613
1	813	14.6048	5.25092	0.0793605	0.416702	0.242562	68.1403
1	691.5	33.0848	6.03366	0.0675004	0.406723	0.255432	79.2134
1	664.5	20.9681	5.83697	0.0648648	0.375043	0.211489	69.3688
1	893.5	18.9364	4.88808	0.0872185	0.424404	0.275317	54.7897
1	821	13.4395	5.32366	0.0801414	0.426108	0.2585	71.7743
1	762.5	15.239	5.26079	0.074431	0.392097	0.251028	82.2906
1	639.5	9.28464	6.09467	0.0624244	0.38153	0.243177	70.4428
1	676	11.5704	6.12861	0.0659873	0.405265	0.263159	80.2356
1	923	32.6628	5.15931	0.0900981	0.469995	0.278397	63.2963
1	1049.5	39.4498	4.66772	0.102446	0.478876	0.287681	65.7118
1	728.5	13.8248	5.38636	0.0711121	0.383215	0.237851	82.6482
1	812.5	17.277	5.20112	0.0793117	0.412429	0.254119	77.854
1	747.5	13.6922	5.30392	0.0729668	0.383222	0.253465	76.6197
1	897.5	14.8603	4.80331	0.0876089	0.418875	0.26182	59.5273
1	1299.5	22.8732	3.97405	0.12685	0.502306	0.322046	87.7148
1	791.5	19.8902	5.36209	0.0772618	0.415183	0.251892	71.9683
1	802.5	44.1557	5.09588	0.0783356	0.397015	0.269063	68.8667
1	785.5	9.81926	5.37224	0.0766761	0.412848	0.243377	84.4071
1	828	10.1906	4.78714	0.0808247	0.388358	0.266441	60.2738
1	732.5	12.2644	5.13614	0.0715025	0.370934	0.255589	63.7039
1	801.5	13.5425	4.57536	0.0782379	0.356593	0.269241	68.8095
1	897	12.7423	5.00625	0.0875601	0.435175	0.272573	73.5001
1	519	10.9561	6.87998	0.0506619	0.351728	0.23107	70.1635
1	789.5	21.24	5.22791	0.0770666	0.404061	0.248868	78.8026
1	884.5	13.9062	4.68536	0.0863399	0.40748	0.282278	65.4923
1	881	11.0028	5.20404	0.0859983	0.447351	0.265176	79.0993
1	894.5	24.7852	4.47901	0.0873161	0.391115	0.287951	62.9734
1	955.5	18.6926	4.79836	0.0932706	0.449746	0.26985	78.2239
1	1068.5	31.4695	4.48824	0.104301	0.466922	0.27513	74.1777
1	915.5	32.3203	4.91934	0.089366	0.438916	0.281888	70.2965
1	646	11.2833	5.79791	0.0630589	0.36628	0.223662	79.9044
1	1130.5	18.9166	4.2707	0.110353	0.467865	0.294766	65.7832
1	682	19.5729	5.96818	0.066573	0.397504	0.270646	67.1184
1	755	22.963	5.38168	0.0736989	0.397944	0.246207	63.8344
1	1080.5	19.7812	4.58158	0.105472	0.482486	0.29128	64.0448
1	749	28.0759	5.80697	0.0731132	0.415829	0.260328	62.7442
1	741.5	16.8194	5.93322	0.0723811	0.409905	0.259999	72.2685
1	820.5	12.1747	5.24006	0.0800926	0.420362	0.280149	46.6062
1	858	25.4369	5.05163	0.0837532	0.422798	0.25013	87.2583
1	1217	43.867	3.99143	0.118797	0.473565	0.296432	74.8521
1	784.5	27.3521	5.06229	0.0765785	0.387819	0.258486	54.6462
1	824.5	19.8542	5.46881	0.0804831	0.440237	0.259239	56.3578
1	756.5	8.66632	5.91714	0.0738453	0.436384	0.269568	83.4042
1	1144.5	64.854	4.44185	0.11172	0.495422	0.293758	65.269
1	896.5	15.5822	4.96302	0.0875113	0.43552	0.270736	72.57
1	671.5	16.295	5.8408	0.0655481	0.385333	0.209456	88.4369
1	927.5	42.8101	4.61204	0.0905374	0.417196	0.287865	43.9158
1	875	23.6335	5.32596	0.0854126	0.450836	0.257259	82.3989
1	1033.5	46.6642	4.6258	0.100884	0.476483	0.273244	61.5424
1	858.5	11.5935	4.72373	0.083802	0.393375	0.281566	44.3559
1	878	31.6677	4.9936	0.0857054	0.430938	0.261307	80.4259
1	780.5	24.5233	5.18869	0.076188	0.393471	0.256172	49.6745
1	747.5	33.6879	5.68907	0.0729668	0.414091	0.266845	44.0383
1	724	30.2917	6.43088	0.0706728	0.448521	0.232959	78.4461
1	670.5	14.0715	6.03899	0.0654505	0.393841	0.230636	58.2557
1	650.5	30.7588	6.50758	0.0634982	0.408082	0.276475	61.1198
1	771.5	10.7496	5.55798	0.0753095	0.420595	0.228098	71.5291
1	601.5	12.0558	6.15653	0.0587151	0.364383	0.212853	78.0946
1	711.5	5.51621	5.76397	0.0694526	0.404881	0.239431	81.9031
1	1146.5	71.5183	4.88791	0.111915	0.53748	0.307791	60.9499
1	1240	49.9039	4.25857	0.121042	0.516064	0.309357	58.6682
1	982	41.0987	5.62045	0.0958573	0.52872	0.286256	54.0954
1	1065.5	28.3821	4.44673	0.104008	0.455392	0.291043	77.9211
1	1175	46.0159	4.07388	0.114697	0.466791	0.324837	78.2955
1	787.5	27.9693	5.31963	0.0768713	0.409264	0.241219	79.9344
1	1004	33.7658	4.77351	0.0980049	0.470996	0.285764	72.3928
1	727.5	54.4454	5.98672	0.0710145	0.424881	0.279894	74.0238
1	1303	25.5911	4.76819	0.127192	0.606523	0.299034	72.3255
1	1111	20.1765	4.38652	0.10845	0.47436	0.305785	53.5037
1	849.5	26.7089	5.19526	0.0829234	0.429362	0.28424	85.0122
1	803.5	35.3447	5.43701	0.0784332	0.42686	0.244145	69.9757
1	1072	47.3435	4.21367	0.104643	0.440508	0.315075	83.9094
1	1117	61.5029	4.69319	0.109035	0.515015	0.283489	75.8166
1	771.5	22.0003	5.4843	0.0753095	0.412719	0.240804	61.2356
1	833.5	32.2201	5.35364	0.0813616	0.439718	0.261454	77.4145
1	807.5	8.04578	5.30829	0.0788236	0.417318	0.254908	81.3365
1	964.5	41.2025	5.52353	0.0941491	0.513237	0.267639	81.1991
1	647.5	37.6126	6.16167	0.0632053	0.39429	0.23978	43.9395
1	796.5	42.6489	5.46691	0.0777499	0.428886	0.243377	54.9712
1	1191.5	61.4328	4.54783	0.116308	0.525037	0.292491	81.8247
1	944	25.0171	4.95688	0.092148	0.456478	0.267491	81.8305
1	971.5	38.5425	4.92458	0.0948324	0.4656	0.288294	56.521
1	1215	41.0149	4.30001	0.118601	0.504643	0.286977	80.0624
1	838	13.8021	5.00218	0.0818009	0.410559	0.278303	54.0684
1	1311	33.6836	3.90462	0.127972	0.499985	0.340952	71.634
1	693.5	7.96243	5.81899	0.0676956	0.398042	0.242866	49.4798
1	750.5	14.2528	5.77381	0.0732596	0.411455	0.254713	73.5924
1	811.5	19.8608	5.10338	0.0792141	0.399378	0.2717	48.9717
1	909	25.7543	4.62574	0.0887315	0.412478	0.283962	66.4472
1	691.5	39.9408	6.21699	0.0675004	0.422677	0.24728	84.3967
1	756.5	14.6144	5.69411	0.0738453	0.419099	0.230544	56.7436
1	672.5	13.2625	5.56287	0.0656457	0.365941	0.242332	49.5385
1	869.5	7.64284	4.85023	0.0848757	0.412292	0.268171	74.8518
1	849.5	11.6077	5.46681	0.0829234	0.454411	0.26655	72.8476
1	550.5	22.2685	7.47794	0.0537367	0.401648	0.229374	70.9274
1	784.5	24.7545	5.08204	0.0765785	0.391478	0.258391	66.7259
1	775	26.286	5.7521	0.0756512	0.436536	0.236591	72.658
1	1053	41.2509	4.42221	0.102788	0.454258	0.292676	72.3989
1	1029	19.7072	4.46148	0.100445	0.447063	0.278836	72.6046
1	1130	38.7187	4.18887	0.110304	0.458093	0.309679	63.7365
1	733.5	14.4825	5.64254	0.0716002	0.403904	0.234065	80.1552
1	975	28.4604	4.84448	0.095174	0.455313	0.289742	63.7915
1	1058	68.5841	4.43543	0.103276	0.457993	0.311079	42.4267
1	872	17.8076	4.74238	0.0851198	0.403882	0.268624	83.327
1	792.5	14.4641	4.6066	0.0773594	0.356615	0.269309	81.1772
1	983.5	53.5987	5.03012	0.0960038	0.481111	0.265046	70.8998
1	1099	45.1263	4.90087	0.107278	0.524512	0.294075	69.1542
1	868	28.8753	5.19888	0.0847293	0.44346	0.266845	69.982
1	824	15.2656	4.92994	0.0804343	0.400306	0.272213	84.9122
1	789	16.8737	5.08766	0.0770178	0.391684	0.278999	81.6936
1	690	35.8762	5.33466	0.0673539	0.363207	0.234374	49.9998
1	737.5	20.6004	5.92313	0.0719906	0.428168	0.247637	75.8431
1	965.5	12.912	4.88698	0.0942467	0.462171	0.279623	70.6896
1	919.5	18.8686	5.01719	0.0897564	0.455219	0.287201	49.2474
1	908	21.2841	4.82691	0.0886339	0.427899	0.280858	56.6078
1	808.5	27.8944	5.4075	0.0789212	0.431542	0.232294	39.3895
1	734	14.1874	5.71496	0.071649	0.412378	0.254196	75.0083
1	966	22.0811	4.57078	0.0942955	0.431567	0.26497	68.6612
1	779.5	22.2019	5.21842	0.0760904	0.395035	0.260098	49.6645
1	873	21.7224	4.79379	0.0852174	0.404955	0.274859	73.6503
1	730	34.9578	5.33455	0.0712585	0.386724	0.24942	40.0112
1	848.5	28.7809	4.81161	0.0828258	0.399038	0.290597	51.96
1	1189	39.9952	4.18624	0.116064	0.483139	0.302107	80.6393
1	715.5	16.1709	5.42922	0.0698431	0.381732	0.253413	80.8311
1	763.5	22.42	5.30391	0.0745286	0.396346	0.258204	62.7726
1	864	73.134	4.82543	0.0843388	0.405653	0.291001	42.3652
1	926	17.1227	4.21197	0.0903909	0.380968	0.278836	71.4366
1	825	35.1162	5.37701	0.0805319	0.43374	0.272079	84.0939
1	979	17.2756	4.6894	0.0955645	0.446753	0.28923	58.4642
1	1049	24.8369	4.41326	0.102398	0.453041	0.292225	84.5217
1	1075.5	52.8163	4.40568	0.104984	0.461914	0.301353	82.6062
1	706.5	18.8121	5.64586	0.0689646	0.392139	0.245509	79.096
1	620.5	8.99476	6.06147	0.0605697	0.366284	0.216873	85.8731
1	1032	75.1365	5.78128	0.100738	0.579038	0.224442	82.639
1	1068	40.9682	4.55809	0.104252	0.476012	0.289639	68.4132
1	1169.5	44.1568	4.31335	0.11416	0.489141	0.290752	70.1039
1	1126.5	27.6391	4.45962	0.109963	0.48593	0.30168	55.6388
1	930	17.8386	4.4439	0.0907814	0.405566	0.29091	75.3538
1	760.5	32.8233	5.75569	0.0742358	0.426819	0.23302	82.6519
1	806	21.6563	5.48123	0.0786772	0.431346	0.257987	82.0961
1	916.5	43.9664	5.0471	0.0894636	0.455795	0.255179	73.5441
1	919	9.62997	4.57137	0.0897076	0.408291	0.276355	68.3843
1	657.5	17.6181	6.30001	0.0641815	0.40636	0.22864	78.4007
1	1108	30.3465	4.16399	0.108157	0.448281	0.293966	77.878
1	704.5	36.4109	5.68274	0.0687693	0.386142	0.236408	73.5662
1	858.5	11.5948	4.92776	0.083802	0.414391	0.264235	80.1843
1	883	54.8232	5.26395	0.0861935	0.440053	0.26307	73.688
1	1000.5	56.4151	4.82482	0.0976632	0.468206	0.240156	71.0006
1	715	17.6047	5.14782	0.0697943	0.360914	0.259699	72.1055
1	1327.5	26.1588	3.8728	0.129583	0.501771	0.326513	71.7308
1	1072.5	41.5468	4.26144	0.104691	0.44969	0.305545	42.1333
1	663	8.57163	5.74063	0.0647183	0.370573	0.222793	84.046
1	932.5	35.0948	4.74943	0.0910254	0.432561	0.272418	79.8308
1	1008.5	35.416	4.76611	0.0984441	0.465965	0.289727	60.6711
1	852.5	6.72101	4.85759	0.0832163	0.40507	0.281814	70.856
1	1080	65.3664	4.67599	0.105424	0.489619	0.281668	85.6863
1	1098.5	43.3306	4.32695	0.107229	0.463938	0.307598	67.0911
1	819	38.5992	5.48354	0.0799462	0.44717	0.268171	42.1912
1	948	22.5749	5.07644	0.0925385	0.468837	0.273276	67.6257
1	661	16.274	5.69824	0.0645231	0.370504	0.225407	81.2851
1	738	21.7422	5.63115	0.0720394	0.406698	0.278127	76.4618
1	989.5	28.339	4.89907	0.0965894	0.465504	0.273634	81.7737
1	965	47.9537	4.96064	0.0941979	0.463694	0.274109	61.39
1	876	16.4334	4.2981	0.0855102	0.36679	0.284801	50.9118
1	776	40.8937	5.17544	0.0757488	0.392357	0.243739	74.2546
1	862.5	22.2732	4.6681	0.0841924	0.392618	0.273014	61.272
1	790.5	20.3035	5.37928	0.0771642	0.420227	0.234834	71.433
1	1034	29.8748	4.66844	0.100933	0.465794	0.273703	58.9739
1	901	20.1435	4.81571	0.0879506	0.420945	0.269037	71.8089
1	714	24.8594	5.44234	0.0696967	0.377097	0.240131	74.1778
1	916	49.1575	5.27569	0.0894148	0.479491	0.27707	63.4861
1	801.5	27.1442	4.9785	0.0782379	0.390247	0.276617	75.5109
1	878	15.9684	4.91443	0.0857054	0.426526	0.263872	78.4995
1	754	38.6973	5.22297	0.0736013	0.380679	0.249948	73.6695
1	808.5	16.365	5.5493	0.0789212	0.427554	0.263743	53.3963
1	1549	44.2278	4.08838	0.151205	0.614989	0.349314	72.6262
1	811	21.9077	5.15891	0.0791653	0.407232	0.256371	67.7475
1	915	23.1418	5.31318	0.0893172	0.467106	0.266077	60.8377
1	838	9.39865	4.75389	0.0818009	0.389324	0.281434	70.8804
1	972.5	24.4599	4.33671	0.09493	0.411529	0.314127	68.6036
1	1088.5	25.4803	4.47784	0.106253	0.480437	0.299144	59.4781
1	794	20.0721	4.96639	0.0775058	0.382649	0.287524	58.9636
1	1144	51.3663	4.1502	0.111671	0.461675	0.314289	51.954
1	682	23.3668	5.87934	0.066573	0.391222	0.207715	53.0822
1	677.5	27.6529	5.6021	0.0661338	0.373664	0.242755	82.1948
1	818	20.6989	4.65009	0.0798486	0.371352	0.276322	73.702
1	746.5	34.7055	5.14799	0.0728691	0.37518	0.245709	69.2219
1	777.5	11.2558	5.12388	0.0758952	0.390478	0.256304	81.0321
1	828.5	28.562	5.05178	0.0808735	0.411517	0.276021	38.8425
1	982.5	20.6768	4.41096	0.0959061	0.421851	0.303005	58.0913
1	734.5	13.208	5.88549	0.0716978	0.424036	0.248737	73.278
1	759	15.4777	5.2797	0.0740893	0.390542	0.269104	69.1437
1	979.5	23.9377	4.63505	0.0956133	0.444605	0.305078	66.9611
1	1273	22.3952	4.28885	0.124263	0.530958	0.298265	71.4141
1	776	24.5015	5.4715	0.0757488	0.412671	0.237618	83.7005
1	748.5	16.7007	5.45062	0.0730644	0.398039	0.241301	73.9526
1	831.5	21.0002	5.06673	0.0811664	0.412723	0.270458	80.2992
1	1136.5	21.3543	4.18081	0.110939	0.463477	0.302425	78.6251
1	705	31.2897	5.60438	0.0688182	0.384904	0.227165	38.1785
1	779.5	17.2205	4.86988	0.0760904	0.36769	0.271686	76.2953
1	872.5	11.4275	4.98195	0.0851686	0.424843	0.258585	72.7262
1	789.5	7.75465	5.235	0.0770666	0.40706	0.267784	62.9056
1	681.5	15.2904	5.73367	0.0665242	0.381425	0.221248	79.5263
1	1423.5	27.1172	3.91655	0.138954	0.540433	0.316777	83.5285
1	862	22.1562	5.09246	0.0841436	0.432951	0.259697	63.3166
1	764.5	17.8399	5.27499	0.0746262	0.39076	0.275047	74.5664
1	901.5	49.704	5.804	0.0879994	0.509801	0.274146	46.354
1	735	30.045	6.11711	0.0717466	0.433095	0.25688	57.1962
1	770.5	9.88513	5.95135	0.0752119	0.4416	0.259921	83.4889
1	1103	41.1172	4.15474	0.107669	0.445204	0.297685	64.8613
1	794.5	26.1684	5.52011	0.0775546	0.428579	0.243049	72.8694
1	943.5	31.6637	4.35746	0.0920992	0.401907	0.289044	63.7983
1	922	26.3492	4.81027	0.0900005	0.4308	0.274316	58.4932
1	745.5	13.7064	5.51569	0.0727715	0.401867	0.252496	86.4309
1	1005.5	12.8981	4.63699	0.0981513	0.456943	0.270004	84.978
1	1076	16.0223	4.24178	0.105033	0.444633	0.286945	67.5323
1	756.5	32.1422	5.23251	0.0738453	0.385835	0.247202	57.3964
1	935.5	30.8785	4.64325	0.0913183	0.420726	0.281346	59.4661
1	944	10.1607	4.31974	0.092148	0.398596	0.28445	85.8587
1	654.5	25.6579	7.31632	0.0638886	0.441727	0.273444	50.8963
1	1052	66.7087	4.43828	0.10269	0.460539	0.297059	48.2065
1	1330	22.0764	4.01342	0.129827	0.52107	0.334961	78.8141
1	871.5	16.7337	4.85645	0.0850709	0.416049	0.254688	65.799
1	930.5	7.54087	4.41562	0.0908302	0.400772	0.311534	56.8648
1	826.5	17.746	4.66746	0.0806783	0.376552	0.274972	71.8956
1	1050	27.8863	4.58276	0.102495	0.470255	0.283487	68.1713
1	765.5	11.0385	5.41638	0.0747238	0.405722	0.257987	49.9304
1	1003	53.9806	4.40474	0.0979072	0.430537	0.276503	70.4706
1	937	13.4844	5.03342	0.0914647	0.454358	0.270626	48.0133
1	876	34.8862	4.80886	0.0855102	0.409101	0.275156	75.4921
1	902.5	24.9435	4.89096	0.088097	0.429486	0.263557	72.2926
1	777.5	11.642	5.31373	0.0758952	0.403444	0.248614	68.3739
1	1151	34.6615	4.24937	0.112354	0.475807	0.283325	70.1638
1	822	32.0702	5.53417	0.080239	0.449399	0.287052	54.2506
1	1164	37.1557	4.28498	0.113623	0.48654	0.286851	67.0964
1	779.5	15.375	5.03873	0.0760904	0.384669	0.257379	65.3661
1	909.5	15.3912	5.30109	0.0887803	0.46975	0.267355	64.6865
1	822	19.3558	5.13485	0.080239	0.411002	0.246919	82.6964
1	782.5	21.6819	4.89464	0.0763833	0.375389	0.262199	42.5899
1	841	11.9539	5.0468	0.0820937	0.415988	0.256908	49.9904
1	707	23.7134	5.98007	0.0690134	0.414144	0.23001	53.9213
1	950.5	14.72	4.78715	0.0927825	0.444062	0.283779	48.7326
1	972	39.3616	4.76208	0.0948812	0.448563	0.299617	80.5595
1	796.5	19.8125	5.0935	0.0777499	0.397919	0.269836	74.0724
1	894	45.9437	5.48599	0.0872673	0.481928	0.264128	64.8129
1	845.5	15.5792	5.42377	0.082533	0.447364	0.255528	81.8052
1	1107.5	59.8636	4.62877	0.108108	0.503131	0.292225	76.6312
1	713.5	22.9535	5.25232	0.0696479	0.370452	0.247395	44.9587
1	855	20.0313	4.9947	0.0834603	0.41642	0.263655	63.6294
1	1012	28.592	4.6007	0.0987858	0.454588	0.294088	75.0126
1	800	30.1222	5.12249	0.0780915	0.400972	0.261911	78.9347
1	1164	31.1504	4.55697	0.113623	0.517653	0.292636	78.0974
1	873	28.4148	4.97347	0.0852174	0.424394	0.258823	80.1924
1	911.5	20.4602	4.63747	0.0889755	0.412435	0.289614	67.5724
1	1029	24.6426	4.56334	0.100445	0.457559	0.293409	71.0386
1	977	24.6243	4.39005	0.0953693	0.416626	0.285014	71.7855
1	1094.5	20.0095	4.23467	0.106839	0.451277	0.29559	77.0097
1	962	40.0756	4.95201	0.0939051	0.461028	0.263735	73.5885
1	1128.5	17.4504	4.15113	0.110158	0.453396	0.288108	87.6507
1	861	22.0833	5.24126	0.084046	0.441565	0.267966	73.7171
1	920.5	25.7136	4.74308	0.0898541	0.423863	0.280754	68.0964
1	781	43.7686	6.08857	0.0762368	0.462798	0.253499	74.6882
1	1040.5	20.4281	4.48006	0.101568	0.451792	0.288232	79.6779
1	1029.5	29.6094	4.56358	0.100494	0.454492	0.298575	73.8314
1	875.5	37.3366	5.43437	0.0854614	0.461275	0.260226	70.9584
1	674	22.0709	6.07213	0.0657921	0.399194	0.238438	57.4439
1	844.5	10.3196	5.18308	0.0824354	0.427122	0.253413	74.9594
1	1184	15.8998	4.43279	0.115575	0.509892	0.318264	80.4424
1	994	35.3984	4.71198	0.0970287	0.457407	0.275929	70.8811
1	952.5	12.3057	4.40767	0.0929777	0.410083	0.308921	73.4281
1	790	14.756	4.83365	0.0771154	0.374081	0.270238	74.1777
1	903	31.2395	5.11272	0.0881458	0.444705	0.259326	53.494
1	903.5	37.4207	5.09032	0.0881946	0.454403	0.259243	72.9436
1	1081.5	49.1173	4.55693	0.10557	0.480508	0.287538	56.3869
1	929	15.4708	4.60152	0.0906838	0.416159	0.302055	55.2855
1	743.5	35.5018	6.31343	0.0725763	0.43016	0.268958	77.7841
1	1037	67.4398	4.73835	0.101226	0.479914	0.323724	65.8021
1	773	13.1355	5.47388	0.0754559	0.412931	0.239666	73.3433
1	748	17.1825	5.27722	0.0730156	0.386892	0.245992	70.9289
1	882	12.7302	4.6794	0.0860959	0.405094	0.287121	69.9734
1	781.5	18.6728	5.19426	0.0762857	0.398417	0.247221	80.1994
1	1035	15.527	4.5975	0.101031	0.464505	0.278181	68.5358
1	1560	67.1068	3.83033	0.152278	0.581949	0.394602	66.9124
1	1068.5	51.5243	4.79031	0.104301	0.503349	0.277432	82.1583
1	1144	25.0556	4.36754	0.111671	0.489332	0.305545	88.7397
1	811	12.4972	5.1143	0.0791653	0.403215	0.280388	87.4801
1	808.5	24.6947	5.05849	0.0789212	0.399314	0.278223	71.0425
1	1109	37.562	4.23085	0.108254	0.451847	0.291825	54.3382
1	736.5	34.6884	5.25945	0.071893	0.378516	0.250649	66.5641
1	990.5	44.8301	4.62851	0.0966871	0.449785	0.283575	51.5709
1	1188	40.1576	4.58323	0.115966	0.534501	0.303317	74.3943
1	967	40.5421	4.82711	0.0943931	0.456938	0.28554	78.336
1	1014	31.8019	4.69725	0.098981	0.466682	0.272281	78.0907
1	1040.5	42.4891	4.14816	0.101568	0.421608	0.304593	48.6676
1	804.5	13.0408	5.27843	0.0785308	0.414522	0.252236	76.9102
1	959.5	44.0407	4.86187	0.093661	0.457102	0.270992	70.3776
1	702	27.7592	5.65572	0.0685253	0.387468	0.237737	75.8496
1	984	23.1783	4.64875	0.0960526	0.450327	0.274684	77.3269
1	1095	36.9658	4.45157	0.106888	0.47342	0.284103	78.4258
1	1028	14.7132	4.63426	0.100348	0.461451	0.272179	86.4096
1	950	10.8205	5.06447	0.0927337	0.469008	0.26609	76.9771
1	1555.5	39.1512	4.04416	0.151839	0.61241	0.346202	67.2671
1	912.5	61.5041	5.62914	0.0890731	0.50642	0.291791	71.7781
1	769	44.489	5.87185	0.0750655	0.44313	0.276237	75.946
1	906	9.93801	5.11915	0.0884386	0.451946	0.25633	80.9505
1	910.5	57.1251	4.94513	0.0888779	0.43103	0.228032	63.974
1	814.5	14.6029	5.4144	0.0795069	0.428956	0.246103	82.3263
1	1247.5	36.6897	4.0644	0.121774	0.491967	0.296185	76.2219
1	751.5	21.3469	5.49118	0.0733572	0.406062	0.243022	51.5023
1	975	27.7141	4.84275	0.095174	0.466408	0.280941	76.3199
1	905	12.7738	4.77231	0.088341	0.417927	0.283086	74.38
1	933.5	25.7329	4.49251	0.091123	0.408355	0.279913	76.498
1	1103	27.4002	4.14524	0.107669	0.438401	0.302742	61.7861
1	796	31.6604	5.69889	0.0777011	0.443734	0.270674	58.4618
1	940	40.1271	4.86989	0.0917575	0.44848	0.287472	83.7024
1	991.5	36.5621	5.05859	0.0967847	0.480784	0.296356	60.2983
1	1322.5	75.1488	4.55402	0.129095	0.587673	0.296193	69.8843
1	923	18.8356	4.61923	0.0900981	0.416803	0.278527	58.2389
1	857	18.2656	4.96199	0.0836555	0.41813	0.273244	72.3258
1	791.5	12.5678	5.32508	0.0772618	0.41385	0.269546	57.3118
1	711.5	17.6435	5.617	0.0694526	0.387666	0.221046	78.6708
1	649	28.904	6.42086	0.0633517	0.404827	0.228275	58.2849
1	1149	36.6439	4.10696	0.112159	0.458619	0.317175	79.4945
1	1029.5	42.6178	4.32982	0.100494	0.429223	0.30028	66.9152
1	858.5	22.2969	4.82097	0.083802	0.402125	0.290845	81.2088
1	816.5	10.5245	5.05354	0.0797022	0.401883	0.247395	76.3838
1	755	9.65389	5.21576	0.0736989	0.392958	0.254863	73.7499
1	581	19.5413	6.91739	0.056714	0.369735	0.244042	53.2571
1	1022.5	27.4864	4.39201	0.0998107	0.439677	0.278804	78.9114
1	806	52.871	5.36211	0.0786772	0.422655	0.258084	54.1408
1	931	17.0047	5.01227	0.090879	0.45391	0.255062	84.8599
1	772	47.4842	5.73808	0.0753583	0.431579	0.253268	61.2892
1	1103.5	23.7056	4.52153	0.107717	0.48201	0.290467	76.6144
1	828	7.57269	4.95892	0.0808247	0.397846	0.265217	76.6796
1	1020	48.0743	5.6945	0.0995667	0.567242	0.288406	58.1207
1	1424	38.854	4.89983	0.139003	0.67837	0.265346	86.2209
1	1146	16.986	4.14358	0.111866	0.462939	0.275745	66.5444
1	854.5	23.3138	4.9765	0.0834115	0.418774	0.263558	62.9147
1	807	17.4826	5.54665	0.0787748	0.432571	0.253169	56.8147
1	616.5	16.2735	5.66768	0.0601793	0.343384	0.223328	84.0557
1	650.5	19.7326	7.22887	0.0634982	0.437647	0.258682	71.6196
1	847	40.1837	5.0287	0.0826794	0.414382	0.257877	63.865
1	875	14.1323	5.12281	0.0854126	0.434613	0.284275	88.1083
1	985	49.9314	4.21116	0.0961502	0.402326	0.297936	73.7776
1	1128	20.547	4.473	0.110109	0.490502	0.281277	80.2238
1	839.5	18.5318	4.40222	0.0819473	0.360918	0.292539	68.3849
1	990	65.2437	4.2035	0.0966383	0.405617	0.287052	86.7219
1	704.5	26.4128	5.79199	0.0687693	0.400149	0.239438	81.0851
1	1120.5	50.0433	4.69752	0.109377	0.51385	0.281794	80.5808
1	837.5	24.9178	5.43524	0.0817521	0.429299	0.247427	64.3755
1	999	30.3345	4.50037	0.0975168	0.438868	0.287625	76.7601
1	1128.5	39.6849	4.32967	0.110158	0.4778	0.294823	71.7974
1	580.5	10.4857	6.86538	0.0566652	0.384623	0.237084	52.7253
1	920.5	42.1002	5.11722	0.0898541	0.459722	0.24867	87.8661
1	891	33.6745	4.75558	0.0869744	0.410182	0.270261	74.6147
1	995.5	17.1309	4.81355	0.0971751	0.471136	0.289901	50.3098
1	940	25.6768	4.83681	0.0917575	0.447979	0.284573	54.3928
1	1176.5	55.0031	4.21658	0.114843	0.483244	0.321308	83.5352
1	881.5	39.4919	4.78474	0.0860471	0.417183	0.279432	33.4988
1	1035.5	57.1052	4.52258	0.10108	0.452618	0.298615	34.0993
1	1131.5	31.9181	4.22165	0.110451	0.466581	0.303076	76.9964
1	709	9.04956	5.53764	0.0692086	0.387975	0.274114	81.4456
1	1285	21.5261	4.13907	0.125435	0.51414	0.302407	67.7691
1	978	22.6417	4.77002	0.0954669	0.451485	0.286619	78.8575
1	1004.5	27.7337	4.58552	0.0980537	0.447516	0.275789	72.9832
1	1061	23.8738	4.52263	0.103569	0.466234	0.293819	74.972
1	883.5	16.8501	4.95297	0.0862423	0.431367	0.264085	83.4439
1	821.5	15.4074	5.64697	0.0801902	0.45275	0.263323	69.7074
1	870.5	19.5196	5.11104	0.0849733	0.431098	0.263054	68.1488
1	573	12.5965	6.55955	0.0559331	0.369059	0.245904	74.0658
1	650.5	60.4881	6.25064	0.0634982	0.397112	0.209561	52.0335
1	882.5	72.2941	5.37936	0.0861447	0.463423	0.270818	61.9615
1	934	39.1525	4.89634	0.0911718	0.445181	0.272486	75.095
1	731	50.2878	5.44211	0.0713561	0.38656	0.272424	65.3006
1	1117.5	65.4007	4.50935	0.109084	0.487993	0.310072	81.7455
1	941.5	24.201	5.10613	0.091904	0.468015	0.27402	68.8415
1	1005.5	36.9339	4.30322	0.0981513	0.420433	0.285274	59.1257
1	1044.5	58.5384	4.77928	0.101958	0.479614	0.29146	63.7481
1	1154	25.7626	4.15095	0.112647	0.467316	0.308209	82.6258
1	788	17.7352	5.37572	0.0769201	0.40239	0.266135	85.4969
1	952	52.7107	4.92381	0.0929289	0.447516	0.248737	73.5673
1	1199.5	20.6274	4.43241	0.117088	0.516366	0.264171	84.3598
1	772.5	20.7656	5.68679	0.0754071	0.428758	0.255047	85.063
1	837.5	23.755	4.9069	0.0817521	0.399491	0.281909	87.6979
1	838	21.3987	4.93068	0.0818009	0.400995	0.270626	65.0757
1	962.5	22.4389	4.80511	0.0939539	0.452534	0.298585	73.9776
1	1017.5	28.4555	4.46615	0.0993227	0.445417	0.297591	52.6145
1	826	48.0581	5.41443	0.0806295	0.435958	0.259199	61.845
1	724	13.317	5.46811	0.0706728	0.390015	0.264737	78.1853
1	910	19.0497	4.97174	0.0888291	0.446413	0.276724	66.0745
1	899	32.9818	5.32248	0.0877553	0.468771	0.273765	71.0105
1	1217	22.3022	4.11915	0.118797	0.484624	0.305418	86.267
1	1274.5	30.0469	3.9281	0.12441	0.489347	0.316061	77.8545
1	967.5	26.4739	4.32962	0.0944419	0.408827	0.300833	49.7201
1	984.5	23.3046	4.8339	0.0961014	0.462923	0.285904	77.8549
1	652.5	22.2799	6.65436	0.0636934	0.40741	0.243717	69.7676
1	1094.5	48.3868	4.02337	0.106839	0.428215	0.297718	76.4494
1	704	18.8766	5.97754	0.0687205	0.410543	0.250549	73.0976
1	912	62.5877	4.60981	0.0890243	0.411869	0.290137	44.459
1	1115	35.417	4.126	0.10884	0.446205	0.327218	61.5279
1	1051.5	28.2655	4.40471	0.102642	0.449672	0.305591	75.0538
1	956.5	89.9181	5.00171	0.0933682	0.463872	0.251574	69.9373
1	1052.5	22.567	4.81879	0.102739	0.488458	0.280677	79.8118
1	1232	89.3463	5.71846	0.120261	0.689894	0.23721	68.5684
1	768.5	24.3763	5.76599	0.0750167	0.425384	0.261684	72.8349
1	1157.5	19.7155	4.16337	0.112989	0.469784	0.32333	71.8885
1	792	29.7449	5.30128	0.0773106	0.409907	0.267449	65.4666
1	802.5	31.0098	5.09147	0.0783356	0.401066	0.259776	73.6105
1	733	25.8632	5.43861	0.0715514	0.389135	0.268243	82.6618
1	865	9.28152	4.95049	0.0844365	0.417504	0.254688	73.3257
1	891	8.52498	4.74405	0.0869744	0.411712	0.289119	81.8645
1	950.5	24.1943	4.45642	0.0927825	0.412521	0.292307	79.0252
1	724	17.418	5.36893	0.0706728	0.381415	0.244218	73.5657
1	783	16.7488	5.67676	0.0764321	0.429428	0.263086	75.2653
1	768	25.5537	5.29151	0.0749679	0.394016	0.248925	67.3299
1	765.5	27.3598	5.47892	0.0747238	0.409225	0.273551	55.9043
1	1099.5	42.4482	4.6074	0.107327	0.49053	0.29763	75.4919
1	934	14.6541	4.67317	0.0911718	0.422067	0.278608	82.3869
1	1176.5	37.1342	4.30535	0.114843	0.491018	0.304374	84.1073
1	698	21.0473	5.46109	0.0681349	0.373605	0.258718	69.2946
1	1038.5	44.3522	4.66914	0.101373	0.47323	0.280343	82.9361
1	1247	42.3456	4.21499	0.121725	0.49799	0.318275	84.7212
1	832.5	19.7207	5.38616	0.081264	0.430335	0.269687	64.3654
1	1245	25.1177	4.15708	0.12153	0.504982	0.301417	82.5654
1	1047.5	15.9421	4.3648	0.102251	0.445614	0.286759	71.9375
1	777.5	17.56	5.43886	0.0758952	0.415026	0.273144	80.3622
1	926	37.4679	4.94286	0.0903909	0.44679	0.276274	67.0217
1	1027	10.5253	4.66847	0.10025	0.464723	0.248885	81.3885
1	1045.5	43.9088	4.09804	0.102056	0.420675	0.302198	46.8605
1	848.5	50.8612	5.6542	0.0828258	0.465107	0.263399	76.1274
1	1054	21.051	5.01772	0.102886	0.516122	0.287482	82.21
1	1100.5	18.4104	4.45762	0.107425	0.47378	0.285411	81.0596
1	833.5	27.0477	4.56391	0.0813616	0.370608	0.290996	41.8986
1	1174	35.6496	4.42076	0.114599	0.506925	0.314224	76.3791
1	1158	27.2166	4.38107	0.113037	0.462603	0.286487	74.3831
1	832.5	31.0173	5.91476	0.081264	0.468962	0.287327	72.5638
1	884	33.2232	4.8124	0.0862911	0.414105	0.273773	74.2739
1	1255	21.2505	4.28772	0.122506	0.519603	0.301253	84.7305
1	1025	27.7974	4.56227	0.100055	0.457143	0.286089	69.9998
1	716	8.36314	5.60831	0.0698919	0.3936	0.267598	82.8759
1	1138	37.8873	4.2217	0.111085	0.468199	0.291432	73.4535
1	832.5	15.758	4.9602	0.081264	0.403069	0.253268	82.5878
1	1383	26.1419	4.09388	0.135001	0.552557	0.31823	72.1701
1	985	19.4689	4.62242	0.0961502	0.439374	0.272823	83.1252
1	844	22.1412	4.9859	0.0823866	0.410718	0.274932	63.9941
1	821	19.338	5.35507	0.0801414	0.42716	0.284038	69.8859
1	1323.5	36.8807	4.04897	0.129193	0.523091	0.315347	82.5086
1	880.5	37.2201	4.79235	0.0859495	0.408662	0.248769	51.4848
1	1006.5	19.2971	4.96529	0.0982489	0.482958	0.281543	73.2515
1	1353	22.2823	3.89762	0.132072	0.516028	0.314297	81.8924
1	972	12.1742	4.58768	0.0948812	0.433405	0.290242	74.3738
1	926	31.7312	5.1053	0.0903909	0.460698	0.284788	79.4702
1	1015.5	30.9265	4.63668	0.0991274	0.452941	0.289734	78.2102
1	970	69.3247	5.10631	0.094686	0.485253	0.27291	81.2134
1	809	12.9865	4.72613	0.07897	0.371689	0.258719	76.3534
1	899.5	30.4389	4.99221	0.0878042	0.43834	0.269893	77.5593
1	889	45.4863	5.01916	0.0867792	0.438324	0.295693	77.9795
1	1180.5	11.8682	4.2644	0.115234	0.493992	0.294142	80.107
1	1265.5	22.8515	4.30426	0.123531	0.531665	0.326279	62.4218
1	957	15.8289	4.56426	0.093417	0.424003	0.257877	73.6516
1	1056.5	27.2438	4.19201	0.10313	0.431629	0.296168	72.8097
1	699	12.2573	5.50153	0.0682325	0.375213	0.27242	63.9375
1	896.5	21.9285	4.57426	0.0875113	0.400266	0.263415	68.7808
1	1022	24.1071	4.46923	0.0997619	0.443931	0.285921	72.9601
1	1214	15.093	4.21589	0.118504	0.496701	0.286392	83.3249
1	1063	13.1744	4.4146	0.103764	0.457894	0.285457	69.9256
1	871.5	9.86859	5.53822	0.0850709	0.463543	0.269014	81.4984
1	818	11.858	4.99992	0.0798486	0.399249	0.253413	64.9068
1	1451	51.3465	4.2978	0.141638	0.608282	0.291548	85.702
1	1037.5	18.9251	4.44005	0.101275	0.449312	0.292298	75.9132
1	1118.5	25.5834	4.57318	0.109182	0.499426	0.287121	75.0688
1	1064	32.421	4.17192	0.103862	0.432937	0.302794	74.0969
1	751	33.0252	5.82205	0.0733084	0.426616	0.24984	63.3026

## Sheet: pif4_hAT_C
Predicate	Pixel count	SSE	LS Ratio	Surface	Length	Width	Axes angle
1	900	43.2773	5.13946	0.087853	0.45097	0.25194	71.8235
1	746.5	24.8731	5.63903	0.0728692	0.41642	0.257919	64.9931
1	1002.5	24.4616	4.26574	0.0978584	0.41458	0.281732	67.6445
1	1026.5	12.2295	4.30009	0.100201	0.430087	0.286177	84.0751
1	1115.5	23.0781	4.5658	0.108889	0.494959	0.261051	80.6217
1	1139.5	45.6276	4.04385	0.111232	0.446931	0.292993	54.8147
1	1239.5	21.5522	4.34918	0.120993	0.522231	0.288623	83.4996
1	1091.5	53.1133	4.36729	0.106546	0.463457	0.293325	69.0513
1	884.5	53.256	5.16374	0.0863399	0.442634	0.283048	75.2033
1	1328	39.9969	4.17545	0.129632	0.539894	0.304804	75.5856
1	1009	26.25	4.77417	0.0984929	0.472173	0.286327	76.8042
1	1116.5	22.0482	4.36215	0.108986	0.463493	0.30657	65.4056
1	1247	60.2939	4.37274	0.121725	0.526997	0.294822	81.8084
1	1201.5	14.0647	4.09166	0.117284	0.479896	0.293227	87.1469
1	925.5	9.53139	4.76344	0.0903421	0.424263	0.254754	78.4474
1	1126.5	13.21	4.43056	0.109963	0.482	0.28158	77.003
1	1158	57.2916	4.05139	0.113037	0.457559	0.309587	58.1776
1	867.5	22.761	5.39294	0.0846805	0.456448	0.255334	69.17
1	1088	34.6874	4.41236	0.106204	0.46958	0.303622	69.8547
1	1037.5	7.09396	4.60773	0.101275	0.466713	0.2663	81.2747
1	979	34.241	4.8015	0.0955645	0.471036	0.271813	87.4545
1	929.5	20.3491	4.8518	0.0907326	0.440925	0.27164	59.3006
1	884	53.8068	4.98938	0.0862911	0.425239	0.271781	78.6614
1	1217.5	29.0359	4.11113	0.118846	0.487874	0.261112	67.9713
1	1126	30.2309	3.98956	0.109914	0.438537	0.323934	69.1914
1	1139	42.6267	4.46105	0.111183	0.494789	0.298458	65.4942
1	1638.5	37.9599	3.66179	0.159941	0.578332	0.340682	79.2269
1	1236.5	34.8897	4.25159	0.1207	0.506654	0.315445	63.375
1	1259	22.5463	4.27394	0.122897	0.512792	0.301988	83.0834
1	969	26.2341	4.99664	0.0945884	0.476698	0.258112	74.0863
1	1096.5	12.9962	4.64779	0.107034	0.497239	0.303921	58.9365
1	875	31.6277	5.42039	0.0854126	0.460303	0.238616	82.0524
1	1225	21.3123	4.43636	0.119578	0.518741	0.291812	79.833
1	792.5	47.0611	5.28236	0.0773594	0.408418	0.258498	85.6521
1	960	33.8311	4.88037	0.0937098	0.460648	0.281671	60.0282
1	1025	14.504	4.484	0.100055	0.443269	0.280147	74.7402
1	879.5	18.6404	5.33553	0.0858519	0.457183	0.262586	61.3703
1	1096.5	51.3654	4.87719	0.107034	0.52266	0.283095	72.0976
1	852.5	22.2827	5.22609	0.0832163	0.437657	0.245593	79.0135
1	1081.5	13.2027	4.33887	0.10557	0.460289	0.293609	63.4544
1	934	53.8557	4.86587	0.0911718	0.443835	0.277354	64.5334
1	1064	50.2756	4.67484	0.103862	0.487309	0.292464	80.9952
1	834.5	29.5935	5.58027	0.0814592	0.45335	0.236366	75.9775
1	1105	10.7098	4.18423	0.107864	0.451286	0.286468	80.4396
1	1052	9.50758	4.21942	0.10269	0.432105	0.292387	81.2507
1	1068.5	21.9494	4.27749	0.104301	0.446072	0.306963	53.4965
1	1008	60.5332	5.392	0.0983953	0.531907	0.261626	70.5055
1	961.5	47.6962	4.5371	0.0938562	0.412293	0.269215	62.7688
1	902.5	13.7174	4.89018	0.088097	0.433223	0.275459	66.1537
1	1024	15.6965	4.59775	0.0999571	0.459432	0.262565	88.5955
1	804	9.4437	5.41036	0.078482	0.422645	0.246103	81.0958
1	1041.5	32.7201	4.71735	0.101665	0.479493	0.27749	55.8547
1	800	17.8881	5.47006	0.0780915	0.427112	0.238349	55.4272
1	1093.5	35.1537	4.26234	0.106741	0.454432	0.287713	72.3188
1	1062	13.8088	4.77069	0.103666	0.494646	0.283666	64.8098
1	1217.5	37.3993	4.48198	0.118846	0.532667	0.289229	87.0468
1	973.5	15.7452	4.53434	0.0950276	0.419486	0.278636	62.5758
1	1109.5	14.799	4.40273	0.108303	0.475539	0.281534	74.8975
1	1240.5	32.343	4.32632	0.121091	0.522692	0.301579	73.2711
1	1131	63.6962	4.56655	0.110402	0.5014	0.285669	85.3734
1	1012.5	11.3259	4.74782	0.0988346	0.47218	0.276714	75.7434
1	1080.5	17.981	4.57995	0.105472	0.480475	0.288066	77.6382
1	1013	18.6799	5.0771	0.0988834	0.499916	0.286601	81.6474
1	1263	34.2906	3.96863	0.123287	0.481131	0.311658	75.3684
1	903.5	23.1978	4.85272	0.0881946	0.426706	0.244145	71.1381
1	834.5	23.415	5.21459	0.0814592	0.423817	0.24905	81.0937
1	1238	41.2634	4.10982	0.120847	0.493043	0.306579	74.1803
1	955.5	50.9515	4.58557	0.0932706	0.427597	0.292979	45.4438
1	1355.5	68.8186	3.77438	0.132316	0.496796	0.324814	76.3946
1	973	29.5118	4.77763	0.0949788	0.453717	0.279482	79.5416
1	1005.5	61.8488	4.90769	0.0981513	0.481686	0.273211	79.6825
1	1355	19.93	4.07233	0.132268	0.538901	0.315025	87.7049
1	1304	39.02	4.06696	0.127289	0.516324	0.285881	79.9395
1	1155	24.8488	4.07491	0.112745	0.459093	0.29468	77.4039
1	830.5	51.2893	5.37436	0.0810688	0.435367	0.220573	84.9925
1	1125.5	13.2408	4.31413	0.109865	0.474147	0.293713	88.0794
1	1062	20.3041	4.74955	0.103666	0.492337	0.276522	78.7827
1	1008.5	20.4502	4.46844	0.0984441	0.441858	0.288341	51.285
1	862	16.5929	5.17776	0.0841436	0.434911	0.247092	66.8075
1	1212	10.831	4.27064	0.118309	0.507008	0.300291	76.5857
1	968	30.8637	4.32806	0.0944907	0.408607	0.286931	42.3244
1	894.5	21.4419	4.70872	0.0873161	0.411336	0.249287	70.9624
1	1069.5	20.2502	4.5094	0.104399	0.468922	0.292134	81.2851
1	1267.5	15.7834	4.00867	0.123726	0.497389	0.31886	83.4501
1	1112	32.6294	4.43276	0.108547	0.481307	0.276198	79.1164
1	891.5	11.9642	4.72775	0.0870232	0.411524	0.292272	47.7611
1	1220	58.5686	5.52857	0.11909	0.660389	0.260717	76.838
1	1016.5	11.4077	4.78498	0.099225	0.47327	0.272863	67.1113
1	1243.5	71.6759	3.94619	0.121384	0.475527	0.325367	71.8128
1	1158	41.7495	4.18007	0.113037	0.473185	0.30786	66.9748
1	837.5	24.5957	5.03432	0.0817521	0.413927	0.267082	69.4401
1	1035.5	34.8192	4.46458	0.10108	0.447882	0.28488	70.7928
1	1092	22.8689	4.53653	0.106595	0.476881	0.299219	64.1845
1	1002	28.1595	4.77103	0.0978096	0.465008	0.258456	62.207
1	1185	40.1819	4.66797	0.115673	0.539956	0.263802	82.4983
1	1263.5	41.9311	3.95589	0.123336	0.48804	0.338875	60.6475
1	734	29.7859	5.69644	0.071649	0.407694	0.292465	41.0794
1	1302	35.7344	4.20391	0.127094	0.533469	0.30105	66.4193
1	1108	31.3758	4.67967	0.108157	0.499916	0.288392	75.6212
1	1032	25.0679	4.27324	0.100738	0.426977	0.29254	48.6972
1	825.5	38.7508	5.27525	0.0805807	0.42593	0.247182	79.0158
1	980	17.7986	4.77286	0.0956621	0.455881	0.279834	72.1806
1	1041.5	30.4989	4.49041	0.101665	0.454366	0.265734	85.3569
1	1161	15.5762	4.24979	0.11333	0.47868	0.296403	71.9968
[truncated: 896 more rows]

## Sheet: pifq_hAT_A
Predicate	Pixel count	SSE	LS Ratio	Surface	Length	Width	Axes angle
[truncated: 1,000 more rows]

[truncated: 5 more sheets: pifq_hAT_B, pifq_hAT_C, 35S PIF4_hAT_A, 35S PIF4_hAT_B, 35S PIF4_hAT_C]
