# Supplementary material for: Integrative phenotyping analyses reveal the relevance of the phyB-PIF4 pathway in Arabidopsis thaliana reproductive organs at high ambient temperature
Source: BMC Plant Biol. 2024 Jul 29;24:721. doi: 10.1186/s12870-024-05394-w (PMC11285529; doi:10.1186/s12870-024-05394-w)
Supplement: Supplementary file 13 — Additional File 4: Table S2 [file 12870_2024_5394_MOESM13_ESM.xlsx]

## Sheet: Col-0 hAT UP
ID	Description	GeneRatio	BgRatio	pvalue	p.adjust	qvalue	geneID	Count
GO:0016310	phosphorylation	685/6993	1279/19652	4.48552e-42	3.93829e-39	3.13986e-39	AT5G35170/AT3G63340/AT5G64070/AT2G37840/AT4G24740/AT4G03230/AT4G33080/AT1G18160/AT5G58350/AT1G53440/AT5G41260/AT4G24450/AT4G30310/AT3G22420/AT1G48430/AT5G51290/AT4G12020/AT3G56960/AT3G53570/AT1G26150/AT4G32660/AT1G67580/AT5G63930/AT1G65950/AT5G14720/AT1G73660/AT4G08470/AT3G59410/AT5G04510/AT3G48190/AT1G29750/AT4G04740/AT5G57565/AT4G13020/AT3G01310/AT1G49180/AT1G53510/AT1G22870/AT2G31800/AT3G51630…	685
GO:0006468	protein phosphorylation	540/6993	998/19652	1.23598e-34	5.42594e-32	4.32592e-32	AT3G63340/AT2G42330/AT2G37840/AT4G24740/AT4G03230/AT4G33080/AT1G18160/AT5G58350/AT1G53440/AT5G41260/AT3G22420/AT4G12020/AT3G53570/AT1G26150/AT4G32660/AT1G67580/AT5G63930/AT1G65950/AT5G14720/AT1G73660/AT4G08470/AT3G59410/AT5G04510/AT1G29750/AT4G04740/AT5G57565/AT4G13020/AT1G49180/AT1G53510/AT1G22870/AT2G31800/AT3G51630/AT1G13350/AT5G18525/AT5G63370/AT3G06620/AT4G21410/AT1G07650/AT1G21590/AT4G38230…	540
GO:0007018	microtubule-based movement	62/6993	63/19652	5.19316e-27	1.51987e-24	1.21174e-24	AT4G38950/AT5G27950/AT3G50240/AT3G51150/AT5G66310/AT3G45850/AT4G39050/AT5G06670/AT2G37420/AT3G20150/AT1G72250/AT2G21380/AT3G12020/AT3G17360/AT1G20060/AT3G44050/AT5G47820/AT5G54670/AT1G21730/AT3G10310/AT1G12430/AT3G43210/AT3G19050/AT3G63480/AT2G28620/AT5G65460/AT1G01950/AT5G60930/AT5G65930/AT4G27180/AT2G22610/AT5G27000/AT2G47500/AT4G21270/AT3G10180/AT5G27550/AT2G36200/AT3G23670/AT5G23910/AT5G10470…	62
GO:0006338	chromatin remodeling	106/6993	141/19652	7.73069e-22	1.69689e-19	1.35287e-19	AT5G42400/AT3G57300/AT3G48710/AT5G43990/AT4G27910/AT1G63490/AT1G50410/AT3G18520/AT1G76710/AT4G21430/AT2G23740/AT3G07740/AT2G40770/AT1G79350/AT3G12980/AT2G25170/AT3G20010/AT1G56460/AT2G36740/AT1G55970/AT2G31650/AT2G18760/AT2G13370/AT1G79000/AT2G23380/AT1G62310/AT5G53430/AT1G16710/AT1G02670/AT3G12810/AT4G02020/AT5G19310/AT3G61740/AT5G18190/AT4G16845/AT5G55300/AT1G08600/AT5G22750/AT1G08620/AT4G00990…	106
GO:0006325	chromatin organization	125/6993	194/19652	2.2169e-16	3.89287e-14	3.10366e-14	AT3G48710/AT1G05830/AT5G43990/AT4G27910/AT1G50410/AT3G18520/AT1G76710/AT1G21610/AT1G55250/AT2G23740/AT1G19100/AT3G12980/AT2G25170/AT3G24010/AT4G32820/AT3G20010/AT2G31650/AT4G19020/AT2G13370/AT1G79000/AT2G23380/AT5G53430/AT1G16710/AT2G43650/AT5G11470/AT2G44950/AT3G12810/AT4G15180/AT4G02020/AT5G19310/AT3G61740/AT2G46020/AT1G08600/AT5G22750/AT1G08620/AT5G09740/AT3G06400/AT4G26630/AT1G30810/AT3G24880…	125
GO:0006974	cellular response to DNA damage stimulus	135/6993	218/19652	1.70573e-15	2.49605e-13	1.99001e-13	AT5G44750/AT3G57300/AT1G66730/AT3G61420/AT1G79950/AT4G02460/AT2G31970/AT5G41370/AT3G28030/AT3G48190/AT1G48360/AT5G24280/AT5G07660/AT5G01630/AT1G67500/AT1G52500/AT2G32700/AT1G19100/AT5G61460/AT5G01780/AT3G20540/AT1G80420/AT2G18760/AT1G80810/AT1G07745/AT5G16630/AT2G27170/AT1G08600/AT3G05210/AT5G45610/AT5G22750/AT5G22010/AT5G41150/AT4G17020/AT5G47690/AT5G57160/AT5G15920/AT1G29630/AT3G54670/AT2G45700…	135
GO:0006281	DNA repair	151/6993	257/19652	2.37995e-14	2.98513e-12	2.37995e-12	AT5G44750/AT3G57300/AT1G66730/AT3G61420/AT1G79950/AT4G02460/AT2G31970/AT5G41370/AT3G28030/AT3G10010/AT3G48190/AT1G48360/AT5G24280/AT5G07660/AT1G76710/AT5G01630/AT1G67500/AT1G52500/AT1G19100/AT1G31360/AT5G61460/AT5G01780/AT3G20540/AT5G63920/AT1G80420/AT2G18760/AT1G80810/AT1G07745/AT5G16630/AT5G46210/AT5G04560/AT2G27170/AT1G08600/AT1G61030/AT3G05210/AT5G22750/AT5G22010/AT5G41150/AT4G17020/AT5G47690…	151
GO:0031047	RNA-mediated gene silencing	64/6993	84/19652	3.27556e-14	3.59493e-12	2.86612e-12	AT1G01040/AT3G03300/AT5G43990/AT1G50410/AT5G20320/AT5G21150/AT1G19100/AT5G23570/AT2G27880/AT3G20010/AT3G20550/AT1G17760/AT1G13790/AT2G19930/AT5G23080/AT3G12550/AT1G48410/AT5G59390/AT3G49500/AT1G54440/AT4G00380/AT3G43920/AT1G15910/AT5G43810/AT2G27040/AT5G13010/AT1G80790/AT1G04050/AT4G36290/AT2G19910/AT4G24970/AT3G05040/AT1G15215/AT1G63020/AT5G04290/AT5G35910/AT2G19920/AT3G15390/AT2G27100/AT5G07350…	64
GO:0006397	mRNA processing	176/6993	333/19652	6.40342e-11	6.24689e-09	4.98044e-09	AT5G09880/AT2G42330/AT3G19670/AT1G09140/AT4G24740/AT3G54230/AT3G04160/AT1G55310/AT5G08230/AT4G36690/AT5G64390/AT5G37370/AT2G02570/AT2G25850/AT1G15200/AT1G60200/AT3G19840/AT3G50670/AT2G42270/AT5G63370/AT1G60900/AT5G61140/AT1G14640/AT3G63070/AT2G35340/AT5G46400/AT3G62310/AT5G58040/AT4G32850/AT4G29750/AT1G07350/AT5G10800/AT5G16180/AT5G47430/AT1G65660/AT1G17760/AT2G16940/AT3G61860/AT3G01370/AT5G65180…	176
GO:0046856	phosphatidylinositol dephosphorylation	22/6993	22/19652	1.31339e-10	1.15316e-08	9.19376e-09	AT3G14205/AT2G43900/AT3G43220/AT1G05630/AT3G63240/AT1G05470/AT2G32010/AT1G34120/AT5G20840/AT1G71710/AT1G65580/AT3G19420/AT1G17340/AT1G47510/AT1G22620/AT2G31830/AT5G39400/AT4G18010/AT5G65090/AT2G37440/AT5G04980/AT2G01900	22
GO:0051321	meiotic cell cycle	57/6993	82/19652	4.0172e-10	3.20646e-08	2.5564e-08	AT5G23610/AT2G31970/AT5G63370/AT5G01630/AT5G48600/AT5G15540/AT5G63920/AT5G19400/AT5G62410/AT3G47460/AT3G43610/AT2G27170/AT1G61030/AT1G08620/AT5G22010/AT3G54670/AT2G42890/AT2G46980/AT1G11060/AT4G30870/AT4G21270/AT1G34355/AT3G20475/AT5G61960/AT1G22275/AT4G22970/AT5G40820/AT4G00020/AT2G26430/AT1G20570/AT5G07290/AT1G22260/AT5G54260/AT5G57880/AT3G09660/AT3G27730/AT1G29400/AT2G14050/AT5G02520/AT1G12790…	57
GO:0007049	cell cycle	150/6993	282/19652	8.99132e-10	6.57865e-08	5.24494e-08	AT4G33260/AT4G33270/AT5G13840/AT2G31970/AT5G01630/AT4G26760/AT1G03780/AT5G48600/AT5G15540/AT4G32700/AT1G27630/AT5G45190/AT5G62410/AT1G80810/AT3G43210/AT3G47460/AT2G39090/AT2G32900/AT2G14120/AT2G27170/AT2G20000/AT1G61030/AT3G07980/AT5G47690/AT3G54670/AT4G31880/AT5G27620/AT2G35630/AT1G09770/AT1G11060/AT3G16320/AT2G20190/AT4G21530/AT3G02680/AT1G77600/AT4G30870/AT1G15940/AT4G21270/AT2G34680/AT5G49880…	150
GO:0032508	DNA duplex unwinding	33/6993	40/19652	1.44447e-09	9.75575e-08	7.77793e-08	AT1G79950/AT5G41370/AT4G25120/AT1G31360/AT5G08110/AT4G35740/AT1G20720/AT1G48050/AT1G06670/AT5G66750/AT1G08840/AT1G03190/AT5G27680/AT2G21660/AT1G16970/AT3G09660/AT2G01440/AT3G27730/AT2G07690/AT2G14050/AT1G79890/AT1G35530/AT3G23700/AT4G14790/AT5G41360/AT1G10930/AT5G44635/AT1G30660/AT2G44980/AT5G46280/AT1G30680/AT1G44900/AT2G16440	33
GO:0030048	actin filament-based movement	19/6993	19/19652	2.93109e-09	1.83821e-07	1.46555e-07	AT4G27370/AT5G54280/AT4G28710/AT2G33240/AT3G58160/AT4G33200/AT2G20290/AT1G17580/AT1G50360/AT5G20490/AT5G43900/AT1G04160/AT1G04600/AT2G31900/AT1G42550/AT1G08730/AT5G20610/AT1G54560/AT3G19960	19
GO:0051301	cell division	149/6993	287/19652	8.89559e-09	5.20689e-07	4.15128e-07	AT4G33260/AT4G33270/AT5G13840/AT1G78580/AT4G26760/AT1G03780/AT5G48600/AT5G15540/AT4G32700/AT2G25170/AT1G27630/AT3G20550/AT5G45190/AT5G62410/AT1G80810/AT3G43210/AT3G47460/AT1G17580/AT2G39090/AT2G44950/AT2G32900/AT2G14120/AT2G27170/AT2G20000/AT1G61030/AT3G07980/AT5G47690/AT3G54670/AT4G31880/AT5G27620/AT2G35630/AT2G26890/AT1G11060/AT3G16320/AT2G20190/AT5G20490/AT4G21530/AT1G77600/AT4G30870/AT1G15940…	149
GO:0016579	protein deubiquitination	37/6993	50/19652	3.4259e-08	1.87996e-06	1.49883e-06	AT5G65450/AT2G40930/AT4G22350/AT3G47890/AT3G11910/AT1G10600/AT5G61940/AT1G52450/AT3G47910/AT1G48790/AT1G17110/AT5G06600/AT4G31670/AT3G14400/AT5G57990/AT4G24560/AT1G04860/AT5G22030/AT5G61950/AT2G32780/AT4G10570/AT1G65120/AT3G49600/AT2G22310/AT4G10590/AT2G24640/AT4G22285/AT5G46740/AT1G52430/AT4G17895/AT3G20630/AT1G65110/AT4G39370/AT2G27630/AT5G51530/AT4G39910/AT1G65200	37
GO:0046777	protein autophosphorylation	67/6993	111/19652	8.72091e-08	4.5041e-06	3.59096e-06	AT4G24740/AT5G58350/AT4G32660/AT5G04510/AT2G31800/AT5G03730/AT3G13690/AT1G08720/AT3G17850/AT3G20200/AT1G69220/AT3G07980/AT3G45780/AT2G01450/AT4G14340/AT5G58140/AT5G60280/AT1G08680/AT2G17520/AT4G16970/AT1G11350/AT3G45240/AT1G67840/AT1G56720/AT2G43850/AT5G35980/AT3G59110/AT5G50860/AT3G13530/AT5G49760/AT4G03260/AT1G06390/AT1G61380/AT5G65530/AT5G66850/AT5G12180/AT5G24430/AT1G71830/AT5G26570/AT1G70520…	67
GO:0008380	RNA splicing	108/6993	206/19652	5.01572e-07	2.44656e-05	1.95056e-05	AT2G42330/AT3G19670/AT1G09140/AT3G54230/AT3G04160/AT1G55310/AT4G36690/AT5G37370/AT3G63400/AT1G15200/AT2G39340/AT1G60200/AT5G04810/AT3G19840/AT3G50670/AT2G42270/AT5G63370/AT1G60900/AT5G61140/AT1G14640/AT3G25840/AT2G35340/AT5G46400/AT3G62310/AT4G29750/AT1G07350/AT5G10800/AT5G16180/AT1G65660/AT3G61860/AT3G01370/AT1G32490/AT1G19290/AT2G43370/AT1G15280/AT2G46610/AT2G29210/AT1G03910/AT1G44910/AT1G09770…	108
GO:0045814	negative regulation of gene expression, epigenetic	27/6993	35/19652	6.16771e-07	2.70763e-05	2.1587e-05	AT1G63490/AT5G16680/AT3G02890/AT3G18520/AT1G21610/AT3G20810/AT2G23740/AT5G01270/AT4G11560/AT2G23380/AT4G02020/AT1G08620/AT2G27350/AT5G11530/AT1G03770/AT1G69770/AT5G46910/AT5G17690/AT5G44280/AT4G20400/AT3G10490/AT1G08060/AT5G10010/AT1G09320/AT4G30200/AT4G39100/AT3G44600	27
GO:0080188	gene silencing by RNA-directed DNA methylation	27/6993	35/19652	6.16771e-07	2.70763e-05	2.1587e-05	AT5G43990/AT1G50410/AT1G05490/AT1G19100/AT3G20010/AT1G13790/AT3G12550/AT5G59390/AT1G54440/AT4G00380/AT1G15910/AT2G27040/AT5G20420/AT1G80790/AT3G07610/AT5G04290/AT5G35910/AT3G14980/AT3G48670/AT3G42670/AT2G21450/AT3G54760/AT3G24340/AT4G03430/AT2G16390/AT2G33290/AT4G01180	27
GO:0006310	DNA recombination	52/6993	85/19652	1.32326e-06	5.33863e-05	4.25631e-05	AT1G66730/AT1G79950/AT4G02460/AT5G07660/AT5G01630/AT4G25120/AT1G31360/AT5G61460/AT1G80810/AT4G35740/AT1G07745/AT3G05210/AT5G22750/AT5G22010/AT5G41150/AT5G47690/AT1G80210/AT5G57160/AT5G15920/AT4G31880/AT1G48050/AT1G77600/AT4G30870/AT1G15940/AT5G63950/AT3G32920/AT4G00020/AT4G21070/AT1G65470/AT5G27680/AT1G16970/AT1G08130/AT5G57880/AT2G01440/AT1G27880/AT5G64520/AT1G12790/AT1G35530/AT3G05740/AT1G10930…	52
GO:0071897	DNA biosynthetic process	22/6993	27/19652	1.3377e-06	5.33863e-05	4.25631e-05	AT5G44750/AT1G66730/AT5G63960/AT4G32700/AT3G20540/AT4G24790/AT5G57160/AT3G49500/AT1G14460/AT1G08260/AT1G50840/AT1G78650/AT5G44740/AT5G67100/AT4G18820/AT2G02480/AT1G10520/AT1G08130/AT1G49250/AT5G45720/AT2G27120/AT3G52050	22
GO:0046488	phosphatidylinositol metabolic process	15/6993	16/19652	1.96246e-06	7.49149e-05	5.97272e-05	AT3G56960/AT3G09920/AT4G33240/AT2G41210/AT3G59770/AT3G14270/AT3G07960/AT1G10900/AT1G21980/AT1G71010/AT1G77740/AT1G01460/AT1G60890/AT1G34260/AT4G01190	15
GO:0008360	regulation of cell shape	20/6993	24/19652	2.12882e-06	7.78795e-05	6.20907e-05	AT3G14570/AT3G08840/AT3G59100/AT2G47410/AT1G77460/AT5G23260/AT2G36850/AT1G05570/AT1G06490/AT4G04970/AT5G13000/AT3G07160/AT2G31960/AT2G22125/AT4G16340/AT1G63680/AT4G03550/AT2G13680/AT5G44610/AT5G36870	20
GO:0034220	monoatomic ion transmembrane transport	65/6993	115/19652	3.53456e-06	0.000124134	9.89677e-05	AT2G23790/AT2G23980/AT4G02900/AT5G26240/AT2G17000/AT5G10490/AT1G30270/AT1G05200/AT3G01100/AT3G17700/AT4G35440/AT1G11960/AT2G46450/AT1G58200/AT2G48060/AT5G57940/AT1G32090/AT1G73020/AT3G07520/AT4G22200/AT5G27100/AT4G15430/AT1G25480/AT1G78610/AT5G37500/AT1G58520/AT3G51480/AT3G14810/AT4G35290/AT1G55620/AT3G21620/AT5G33280/AT2G17260/AT4G03560/AT3G17690/AT1G42540/AT5G53130/AT2G17470/AT2G45870/AT3G11680…	65
GO:0006075	(1->3)-beta-D-glucan biosynthetic process	12/6993	12/19652	4.09675e-06	0.000128462	0.000102419	AT3G14570/AT3G59100/AT2G36850/AT1G05570/AT1G06490/AT4G04970/AT5G13000/AT3G07160/AT2G31960/AT4G03550/AT2G13680/AT5G36870	12
GO:0006282	regulation of DNA repair	12/6993	12/19652	4.09675e-06	0.000128462	0.000102419	AT1G19100/AT4G36290/AT3G13226/AT5G40820/AT5G66130/AT4G24970/AT4G36280/AT4G29860/AT2G31870/AT3G05480/AT5G13130/AT2G31865	12
GO:0034204	lipid translocation	12/6993	12/19652	4.09675e-06	0.000128462	0.000102419	AT1G68710/AT1G26130/AT1G59820/AT5G44240/AT1G72700/AT3G27870/AT1G17500/AT1G54280/AT1G13210/AT3G25610/AT5G04930/AT3G13900	12
GO:0006816	calcium ion transport	33/6993	49/19652	5.95791e-06	0.000180381	0.000143812	AT2G23790/AT4G32060/AT1G10130/AT5G53010/AT4G29900/AT5G57110/AT1G05200/AT3G22910/AT3G51860/AT3G07520/AT5G27100/AT3G51480/AT1G27770/AT4G35290/AT4G00900/AT2G17260/AT4G03560/AT1G42540/AT3G21180/AT2G41560/AT2G32390/AT1G55730/AT3G63380/AT1G07810/AT5G48400/AT3G57330/AT1G64150/AT3G13320/AT2G32400/AT4G35920/AT1G07670/AT4G31710/AT5G11210	33
GO:0010073	meristem maintenance	27/6993	38/19652	9.06277e-06	0.000265237	0.000211465	AT2G25010/AT5G19740/AT1G52150/AT2G32700/AT1G32120/AT5G23630/AT4G07410/AT4G32980/AT3G51290/AT1G50750/AT1G08840/AT5G02130/AT1G23010/AT4G32551/AT3G54170/AT1G17930/AT1G50770/AT1G50830/AT3G02130/AT1G17240/AT5G18510/AT2G04865/AT4G16050/AT4G36920/AT5G06250/AT1G71040/AT1G50760	27
GO:0006357	regulation of transcription by RNA polymerase II	81/6993	154/19652	1.08561e-05	0.000307473	0.000245138	AT5G09410/AT4G32730/AT2G47410/AT2G33540/AT5G19480/AT3G07740/AT5G01270/AT5G44180/AT1G27630/AT2G31650/AT5G45190/AT1G79000/AT5G05660/AT5G64960/AT1G77800/AT5G12230/AT4G21670/AT1G05230/AT1G79700/AT5G46410/AT5G27620/AT1G79020/AT4G16420/AT5G13020/AT4G00730/AT5G26760/AT1G28420/AT4G00450/AT2G26430/AT4G08350/AT2G17410/AT3G58780/AT1G76510/AT1G55325/AT3G07610/AT5G46880/AT5G04290/AT5G04670/AT2G34640/AT4G18140…	81
GO:0080111	DNA demethylation	13/6993	14/19652	1.36584e-05	0.000374752	0.000298777	AT3G10010/AT1G80420/AT5G04560/AT4G36050/AT2G36490/AT3G15120/AT1G05910/AT1G08130/AT4G31270/AT3G14890/AT5G58130/AT4G34060/AT1G72270	13
GO:0042908	xenobiotic transport	19/6993	24/19652	1.60092e-05	0.000425942	0.000339589	AT3G60970/AT1G30420/AT1G30410/AT3G13080/AT2G38330/AT3G21250/AT3G60160/AT1G66950/AT3G62700/AT3G13100/AT1G04120/AT1G30400/AT4G38380/AT2G34660/AT2G47800/AT2G21340/AT1G51340/AT3G59140/AT2G47000	19
GO:0060255	regulation of macromolecule metabolic process	16/6993	19/19652	1.87225e-05	0.000476772	0.000380114	AT4G27910/AT5G26610/AT3G07740/AT5G23570/AT5G53430/AT1G13790/AT3G61740/AT3G12550/AT4G00380/AT1G15910/AT4G16420/AT1G80790/AT1G74250/AT5G09790/AT4G34430/AT3G48670	16
GO:0070588	calcium ion transmembrane transport	38/6993	61/19652	1.912e-05	0.000476772	0.000380114	AT2G23790/AT1G10130/AT5G53010/AT2G23980/AT4G29900/AT5G57110/AT1G05200/AT1G11960/AT5G57940/AT3G22910/AT3G51860/AT3G07520/AT2G17780/AT5G27100/AT3G51480/AT1G27770/AT4G35290/AT4G00900/AT2G17260/AT4G03560/AT1G42540/AT3G21180/AT2G41560/AT2G32390/AT1G55730/AT3G63380/AT5G14870/AT2G34020/AT1G07810/AT5G48400/AT3G57330/AT1G64150/AT3G13320/AT2G32400/AT4G35920/AT1G07670/AT4G31710/AT5G11210	38
GO:0006364	rRNA processing	78/6993	149/19652	1.95487e-05	0.000476772	0.000380114	AT1G01040/AT3G01540/AT2G48100/AT5G08420/AT5G02250/AT5G26180/AT5G66540/AT1G17690/AT2G43650/AT1G76050/AT4G02400/AT2G40360/AT5G08600/AT4G14510/AT5G63420/AT1G75660/AT5G42540/AT1G06560/AT3G11964/AT1G10490/AT5G59980/AT4G26600/AT2G40430/AT3G06530/AT5G38720/AT1G63980/AT5G14580/AT1G66260/AT5G18570/AT5G38747/AT5G48240/AT3G57940/AT3G06480/AT1G01860/AT5G35910/AT3G01160/AT5G46420/AT2G17510/AT1G59760/AT3G15080…	78
GO:0006897	endocytosis	29/6993	43/19652	2.10086e-05	0.000498528	0.00039746	AT3G56960/AT5G54280/AT1G60490/AT2G26890/AT3G43300/AT1G03050/AT3G58600/AT5G35200/AT5G22770/AT3G08530/AT4G02650/AT5G22780/AT5G13300/AT1G14910/AT1G25240/AT3G20290/AT1G68110/AT2G01600/AT4G05520/AT3G01780/AT1G33340/AT3G11130/AT5G65370/AT1G13980/AT5G57200/AT4G25940/AT3G19960/AT5G05190/AT1G05020	29
GO:0051276	chromosome organization	14/6993	16/19652	2.77687e-05	0.000641603	0.000511529	AT1G79950/AT5G07660/AT5G61460/AT5G48600/AT5G62410/AT3G47460/AT2G27170/AT5G15920/AT3G54670/AT5G24630/AT5G58270/AT1G79890/AT1G10930/AT5G05490	14
GO:0009793	embryo development ending in seed dormancy	148/6993	318/19652	3.31303e-05	0.000745857	0.000594647	AT4G00060/AT3G54720/AT4G04350/AT1G68990/AT1G78580/AT2G14680/AT4G24900/AT5G22640/AT2G32700/AT2G35340/AT5G48600/AT5G15540/AT3G27670/AT1G50030/AT1G17690/AT1G30610/AT3G48110/AT4G25520/AT3G54010/AT1G21650/AT5G04560/AT2G34090/AT5G55300/AT1G61030/AT1G32230/AT3G24560/AT3G11450/AT1G03910/AT2G26890/AT1G11060/AT4G21530/AT4G20060/AT5G63420/AT4G07410/AT1G55540/AT3G12080/AT5G62090/AT2G35510/AT5G16715/AT1G14610…	148
GO:0006298	mismatch repair	12/6993	13/19652	3.57835e-05	0.000785448	0.000626212	AT1G65070/AT4G02460/AT4G02070/AT3G24320/AT3G20475/AT5G54090/AT4G35520/AT4G25540/AT3G18524/AT4G09140/AT3G24495/AT4G17380	12
GO:0045892	negative regulation of DNA-templated transcription	92/6993	184/19652	3.96432e-05	0.000848944	0.000676835	AT3G48710/AT1G10450/AT5G15020/AT4G32730/AT2G32700/AT4G14920/AT5G63320/AT2G25170/AT5G44180/AT1G24190/AT1G70060/AT3G01320/AT1G17760/AT4G21670/AT5G67320/AT1G05380/AT4G19190/AT4G26630/AT4G37460/AT1G59750/AT2G27350/AT3G02860/AT5G02810/AT5G11530/AT4G06634/AT2G36080/AT1G03770/AT1G59890/AT5G37380/AT2G30470/AT1G43850/AT5G17690/AT1G28420/AT5G63550/AT2G39810/AT1G02580/AT5G44280/AT4G20400/AT3G10490/AT1G15750…	92
GO:0006813	potassium ion transport	48/6993	84/19652	4.38342e-05	0.000916344	0.000730571	AT5G02940/AT2G35060/AT2G23980/AT4G00630/AT5G11800/AT1G54370/AT2G19600/AT1G30270/AT2G01980/AT1G79610/AT1G14660/AT2G30070/AT4G04850/AT1G05580/AT3G46960/AT4G22200/AT1G31120/AT5G37500/AT5G55470/AT3G05030/AT2G28180/AT1G30450/AT1G60160/AT1G01790/AT2G25600/AT5G51710/AT1G08140/AT4G19960/AT1G08150/AT4G32650/AT4G33530/AT5G09400/AT5G01690/AT5G17850/AT3G17630/AT5G14880/AT5G27150/AT2G31910/AT1G79400/AT3G44900…	48
GO:0001510	RNA methylation	20/6993	27/19652	5.20346e-05	0.00106247	0.000847075	AT5G26180/AT2G28450/AT1G45231/AT1G06560/AT4G20920/AT4G26600/AT2G22400/AT4G40000/AT5G55920/AT1G30545/AT5G51130/AT4G10760/AT3G21300/AT4G25730/AT3G54170/AT5G66180/AT5G13830/AT4G20910/AT4G38020/AT3G13180	20
GO:0032259	methylation	151/6993	329/19652	6.61926e-05	0.001313	0.00104681	AT5G42400/AT1G05830/AT5G43990/AT4G27910/AT1G76710/AT2G23740/AT1G64600/AT2G32170/AT5G26180/AT1G45248/AT5G37170/AT3G23460/AT2G31650/AT2G28450/AT4G19020/AT2G23380/AT5G53430/AT5G05570/AT4G15180/AT5G64030/AT1G13790/AT4G02020/AT3G61740/AT4G17610/AT3G18000/AT1G45231/AT4G20130/AT1G23360/AT4G08990/AT1G06560/AT2G35160/AT4G14140/AT1G78240/AT4G20920/AT1G69770/AT4G16570/AT4G26600/AT1G21920/AT1G04050/AT1G16650…	151
GO:0015914	phospholipid transport	13/6993	15/19652	6.87144e-05	0.001313	0.00104681	AT1G68710/AT1G26130/AT1G59820/AT5G44240/AT1G72700/AT3G27870/AT1G17500/AT3G12740/AT1G54280/AT1G13210/AT3G25610/AT5G04930/AT3G13900	13
GO:0006914	autophagy	32/6993	51/19652	7.0286e-05	0.001313	0.00104681	AT2G37840/AT1G49180/AT5G54730/AT5G47480/AT4G30790/AT3G19190/AT2G46240/AT4G02030/AT3G49590/AT1G54710/AT3G53930/AT5G66930/AT5G47490/AT4G29380/AT1G03380/AT3G62770/AT3G61710/AT3G61960/AT4G04620/AT4G36630/AT1G54210/AT4G30510/AT5G24360/AT5G17290/AT5G45900/AT3G56440/AT3G18770/AT2G40810/AT3G59950/AT4G16520/AT3G06420/AT2G31260	32
GO:0040029	epigenetic regulation of gene expression	32/6993	51/19652	7.0286e-05	0.001313	0.00104681	AT1G05830/AT3G20810/AT4G21430/AT1G79350/AT2G31650/AT5G11470/AT4G15180/AT5G63080/AT2G46020/AT4G00990/AT2G27350/AT5G55390/AT1G54490/AT2G35160/AT5G11530/AT4G24680/AT5G04240/AT5G66750/AT3G01460/AT5G40340/AT3G48430/AT2G28290/AT5G27650/AT3G07610/AT3G18730/AT3G21820/AT5G03280/AT3G09670/AT4G00830/AT2G24740/AT4G30200/AT2G33290	32
GO:0010183	pollen tube guidance	28/6993	43/19652	7.64004e-05	0.00139749	0.00111417	AT1G31450/AT2G35615/AT3G18000/AT5G43513/AT4G08869/AT4G15570/AT5G43285/AT5G60410/AT1G05580/AT4G08850/AT1G67960/AT5G43518/AT5G45840/AT5G43510/AT3G02810/AT4G08875/AT5G16500/AT3G20580/AT5G14850/AT4G18770/AT2G33670/AT2G31910/AT5G20690/AT2G15890/AT4G11720/AT4G26466/AT5G36260/AT3G45640	28
GO:0030422	siRNA processing	14/6993	17/19652	0.000105395	0.00188851	0.00150564	AT1G01040/AT5G23570/AT5G23080/AT3G49500/AT3G43920/AT2G27040/AT4G20920/AT1G63020/AT5G04290/AT1G56310/AT2G40030/AT2G32940/AT4G11130/AT4G15417	14
GO:0006811	monoatomic ion transport	172/6993	384/19652	0.000108042	0.00189721	0.00151258	AT2G23790/AT4G32060/AT5G02940/AT1G10130/AT5G21930/AT2G35060/AT2G23980/AT5G43745/AT4G00630/AT4G02900/AT5G11800/AT4G29900/AT5G26240/AT3G42640/AT1G54370/AT1G16780/AT2G24520/AT2G17000/AT2G19600/AT5G10490/AT1G30270/AT5G57110/AT1G05200/AT3G06450/AT3G01100/AT5G09690/AT3G17700/AT4G35440/AT2G01980/AT5G64560/AT3G26670/AT1G79610/AT1G14660/AT5G53550/AT1G11960/AT2G46450/AT1G58200/AT1G17260/AT1G15960/AT5G26820…	172
GO:0072583	clathrin-dependent endocytosis	21/6993	30/19652	0.000130098	0.00218972	0.00174579	AT4G12780/AT1G59610/AT4G12770/AT1G03050/AT5G35200/AT5G22770/AT3G07960/AT4G02650/AT5G22780/AT4G34660/AT1G14910/AT1G25240/AT1G68110/AT2G01600/AT1G33340/AT3G11130/AT5G65370/AT5G57200/AT4G25940/AT5G24710/AT1G05020	21
GO:0009637	response to blue light	30/6993	48/19652	0.00013071	0.00218972	0.00174579	AT5G38150/AT1G05630/AT1G26260/AT4G28880/AT3G45780/AT4G31390/AT5G27620/AT5G58140/AT1G53090/AT2G21150/AT4G01120/AT2G02710/AT5G35840/AT1G42550/AT2G34640/AT5G42900/AT3G01490/AT5G48560/AT1G66840/AT5G20610/AT4G33980/AT5G02200/AT5G43630/AT1G68050/AT2G46340/AT3G28860/AT5G28490/AT2G36910/AT1G08810/AT4G00050	30
GO:0009908	flower development	105/6993	220/19652	0.000132181	0.00218972	0.00174579	AT5G65050/AT1G30970/AT3G57230/AT4G16280/AT1G01040/AT5G08230/AT3G54720/AT5G64390/AT3G23980/AT5G06100/AT1G76710/AT3G20810/AT5G61380/AT2G32700/AT3G63070/AT5G44180/AT2G47700/AT2G36740/AT5G45190/AT2G23380/AT4G25520/AT5G64960/AT5G46210/AT3G12810/AT1G72560/AT3G06400/AT5G61150/AT5G23260/AT5G23150/AT5G62090/AT5G16780/AT4G02560/AT3G54610/AT5G51230/AT5G60410/AT5G08450/AT5G27220/AT5G13480/AT1G25540/AT5G46910…	105
GO:2000028	regulation of photoperiodism, flowering	37/6993	63/19652	0.000148033	0.00240691	0.00191895	AT2G25930/AT5G16680/AT3G02890/AT3G20810/AT4G21430/AT5G01270/AT4G11560/AT5G23570/AT2G47700/AT5G65060/AT4G00990/AT5G55040/AT1G20670/AT1G76380/AT5G40340/AT4G03110/AT3G48430/AT3G24870/AT5G27650/AT5G42900/AT3G10390/AT3G09670/AT4G33980/AT5G62640/AT3G21320/AT1G55660/AT2G46340/AT5G09530/AT2G42280/AT4G35900/AT1G77180/AT2G18790/AT5G54930/AT4G39100/AT4G37900/AT4G09180/AT5G56550	37
GO:0005992	trehalose biosynthetic process	16/6993	21/19652	0.000175287	0.00279822	0.00223093	AT1G78580/AT5G65140/AT1G68020/AT1G60140/AT2G18700/AT5G10100/AT1G70290/AT4G12430/AT1G06410/AT1G35910/AT4G22590/AT1G23870/AT4G39770/AT4G27550/AT1G22210/AT1G78090	16
GO:0006952	defense response	432/6993	1060/19652	0.000190964	0.00299404	0.00238704	AT5G40910/AT5G24620/AT3G03300/AT5G44510/AT2G24693/AT1G02300/AT2G41060/AT5G52640/AT4G12020/AT5G17890/AT2G21465/AT5G26610/AT5G20320/AT4G16900/AT3G12140/AT3G01310/AT1G73980/AT5G04020/AT5G26000/AT5G26980/AT5G46510/AT5G20380/AT3G56860/AT3G03040/AT1G32540/AT2G33540/AT1G60800/AT3G48231/AT5G21150/AT2G22300/AT1G19100/AT1G33980/AT3G44670/AT4G19510/AT1G59820/AT5G23570/AT1G08720/AT2G27880/AT3G27670/AT1G17380…	432
GO:0007165	signal transduction	142/6993	313/19652	0.000205999	0.00317311	0.00252981	AT5G40910/AT5G44510/AT4G12020/AT5G17890/AT4G16900/AT5G19390/AT5G46510/AT1G03930/AT3G44670/AT4G19510/AT1G30270/AT4G16990/AT3G06630/AT1G78540/AT2G26980/AT5G51630/AT1G27320/AT3G46920/AT5G63770/AT5G46470/AT5G17880/AT1G17040/AT2G17820/AT1G60985/AT5G19280/AT5G61530/AT5G55390/AT5G22690/AT4G19500/AT5G36930/AT1G72840/AT5G18370/AT5G07920/AT4G24580/AT2G01830/AT5G35750/AT1G31540/AT5G44870/AT5G45050/AT1G63740…	142
GO:0006896	Golgi to vacuole transport	10/6993	11/19652	0.000241337	0.00355907	0.00283753	AT5G26980/AT3G55480/AT4G02195/AT1G10290/AT1G60070/AT5G06140/AT3G52850/AT5G16830/AT3G05710/AT3G50860	10
GO:0031507	heterochromatin formation	10/6993	11/19652	0.000241337	0.00355907	0.00283753	AT1G09060/AT4G02020/AT2G27040/AT5G66750/AT5G17690/AT1G65470/AT5G04290/AT2G28240/AT1G08060/AT5G64630	10
GO:0048481	plant ovule development	28/6993	45/19652	0.000243217	0.00355907	0.00283753	AT1G68990/AT5G21150/AT4G25520/AT1G25350/AT5G23260/AT4G21530/AT5G62090/AT5G60410/AT1G43850/AT3G58780/AT5G49030/AT2G41670/AT5G15800/AT1G11130/AT4G29860/AT1G32240/AT5G16560/AT5G07180/AT5G62230/AT3G55400/AT5G62000/AT1G11870/AT3G52600/AT2G25840/AT4G36920/AT4G17300/AT5G42630/AT3G45640	28
GO:0008033	tRNA processing	48/6993	89/19652	0.000296982	0.0042746	0.00340799	AT5G24670/AT2G32320/AT1G76170/AT1G72560/AT3G02370/AT3G24560/AT1G34150/AT3G55160/AT1G78010/AT3G49640/AT1G68720/AT5G60430/AT3G63510/AT2G31580/AT3G16260/AT1G10490/AT2G27760/AT5G59980/AT2G13440/AT5G47970/AT1G07910/AT4G27340/AT5G14580/AT2G22400/AT3G57940/AT1G51310/AT4G40000/AT4G38890/AT2G45270/AT5G13680/AT3G56120/AT1G01760/AT4G04670/AT2G47300/AT2G16650/AT4G01880/AT1G49540/AT3G11220/AT5G15810/AT2G43190…	48
GO:0045010	actin nucleation	14/6993	18/19652	0.000318044	0.00450392	0.00359082	AT4G15200/AT2G38440/AT2G46225/AT5G18410/AT5G54650/AT2G35110/AT1G24150/AT3G05470/AT5G67470/AT1G59910/AT4G14147/AT3G25500/AT1G70140/AT5G07780	14
GO:0006812	monoatomic cation transport	41/6993	74/19652	0.000380176	0.00529833	0.00422418	AT5G21930/AT4G00630/AT5G11800/AT1G54370/AT2G19600/AT3G12100/AT2G47830/AT2G19110/AT2G01980/AT1G79610/AT1G14660/AT4G04850/AT1G05580/AT3G51860/AT3G58810/AT5G44790/AT4G30110/AT5G55470/AT3G05030/AT2G28180/AT1G01790/AT1G55730/AT4G37270/AT5G51710/AT1G08140/AT1G08150/AT1G51610/AT2G34020/AT3G17630/AT5G27150/AT2G31910/AT1G63440/AT1G79400/AT3G44900/AT1G06970/AT3G13320/AT2G04620/AT1G08135/AT4G10310/AT3G52080…	41
GO:0006265	DNA topological change	11/6993	13/19652	0.000409186	0.00561352	0.00447547	AT5G55310/AT4G31210/AT5G63920/AT3G20780/AT5G55300/AT3G23890/AT5G04130/AT2G32000/AT3G10690/AT5G04110/AT3G10270	11
GO:0006886	intracellular protein transport	77/6993	158/19652	0.000446959	0.00603739	0.00481341	AT5G06120/AT5G28350/AT3G61480/AT1G23935/AT3G56450/AT5G26980/AT4G00800/AT5G66160/AT3G09560/AT1G22860/AT3G55480/AT1G21650/AT1G26170/AT3G03110/AT3G27530/AT3G08960/AT3G29100/AT3G43300/AT1G24460/AT4G01800/AT3G44340/AT3G15980/AT2G38020/AT5G62600/AT4G02195/AT1G52360/AT1G10730/AT5G22770/AT3G17340/AT4G32640/AT1G79990/AT1G48760/AT4G27640/AT3G08530/AT1G48550/AT1G73430/AT1G23900/AT3G07100/AT2G27460/AT1G12470…	77
GO:0010228	vegetative to reproductive phase transition of meristem	54/6993	104/19652	0.000455655	0.00606159	0.0048327	AT1G10570/AT3G57300/AT1G01040/AT1G05830/AT3G12140/AT1G76710/AT1G55250/AT4G12680/AT5G44180/AT2G31650/AT2G23380/AT2G46240/AT2G44950/AT1G60220/AT4G15180/AT1G03160/AT3G06400/AT3G04240/AT5G55390/AT4G02560/AT4G32980/AT5G18620/AT3G03140/AT2G15530/AT1G28420/AT2G39810/AT2G43410/AT3G48430/AT3G10490/AT2G21660/AT5G42900/AT3G10390/AT5G06780/AT4G00650/AT4G27630/AT2G02560/AT1G30010/AT3G28730/AT5G02030/AT1G64990…	54
GO:0006289	nucleotide-excision repair	18/6993	26/19652	0.000494213	0.00638116	0.00508748	AT3G61420/AT5G41370/AT3G28030/AT5G08110/AT5G16630/AT4G15475/AT1G20720/AT5G41150/AT4G17020/AT1G55750/AT2G06040/AT1G03190/AT1G05120/AT3G02540/AT1G10520/AT5G21900/AT5G41360/AT1G18340	18
GO:0009556	microsporogenesis	18/6993	26/19652	0.000494213	0.00638116	0.00508748	AT1G34210/AT5G47690/AT4G31880/AT5G57790/AT1G15940/AT1G15110/AT2G36850/AT1G31810/AT3G07160/AT1G02065/AT1G71830/AT5G18700/AT1G77390/AT5G07280/AT2G13680/AT4G20050/AT4G15890/AT3G09880	18
GO:0035556	intracellular signal transduction	20/6993	30/19652	0.000518335	0.00659563	0.00525847	AT3G10550/AT4G04740/AT5G57565/AT4G13020/AT5G04540/AT4G38230/AT1G69220/AT1G45160/AT3G06110/AT2G40116/AT5G58690/AT1G10940/AT1G71860/AT2G46070/AT3G21630/AT4G21940/AT3G22190/AT3G47220/AT3G55940/AT4G08550	20
GO:0007062	sister chromatid cohesion	12/6993	15/19652	0.000567814	0.0070217	0.00559817	AT5G07660/AT5G61460/AT5G15540/AT2G27170/AT5G15920/AT3G54670/AT1G04730/AT5G16270/AT5G40840/AT5G05490/AT3G59550/AT4G15890	12
GO:0010072	primary shoot apical meristem specification	12/6993	15/19652	0.000567814	0.0070217	0.00559817	AT1G30490/AT2G34710/AT5G43810/AT5G27030/AT5G13570/AT4G32880/AT1G36160/AT3G16830/AT3G15880/AT1G15750/AT3G13300/AT1G80490	12
GO:0009553	embryo sac development	40/6993	73/19652	0.000603008	0.00735335	0.00586258	AT1G17690/AT1G17760/AT5G55820/AT3G03110/AT3G06400/AT1G67120/AT4G15570/AT3G11964/AT1G61140/AT5G60410/AT5G59980/AT2G41500/AT1G14350/AT4G00020/AT1G72440/AT2G43410/AT1G01690/AT5G57880/AT5G55490/AT3G23940/AT5G07180/AT5G05970/AT5G44700/AT2G02820/AT5G62230/AT5G17020/AT4G18770/AT3G48360/AT5G48030/AT3G12280/AT5G63160/AT5G18000/AT5G24120/AT2G47430/AT2G34920/AT4G05410/AT4G18830/AT1G09100/AT1G31660/AT1G15440	40
GO:0007015	actin filament organization	28/6993	47/19652	0.000673827	0.00810438	0.00646135	AT4G28710/AT2G33240/AT2G29890/AT3G57410/AT4G33200/AT2G20290/AT1G17580/AT1G75100/AT5G20490/AT5G43900/AT1G04160/AT2G41740/AT5G57320/AT1G04600/AT4G30160/AT2G31900/AT3G27000/AT2G40820/AT1G08730/AT2G35110/AT1G30825/AT1G54560/AT1G60430/AT4G14147/AT1G01750/AT2G30910/AT3G19960/AT2G31300	28
GO:0048511	rhythmic process	26/6993	43/19652	0.000759461	0.0090109	0.00718409	AT3G54500/AT2G25930/AT5G37260/AT5G61380/AT2G47700/AT5G05660/AT5G02810/AT5G60100/AT2G21150/AT3G11540/AT5G17300/AT3G22380/AT5G42900/AT4G37520/AT5G24470/AT2G46830/AT3G09600/AT2G37130/AT5G59570/AT4G33980/AT2G31870/AT1G68050/AT1G01060/AT1G31500/AT1G77180/AT2G46790	26
GO:0000911	cytokinesis by cell plate formation	25/6993	41/19652	0.000802118	0.00937458	0.00747404	AT1G01040/AT4G26760/AT3G17360/AT3G43210/AT3G19050/AT2G28620/AT2G35630/AT1G12360/AT1G50240/AT4G22970/AT1G49040/AT5G10470/AT1G18370/AT5G54440/AT2G41670/AT5G13260/AT3G48860/AT5G51600/AT5G18700/AT5G11040/AT5G55230/AT3G01780/AT2G35190/AT1G13980/AT4G08630	25
GO:0006306	DNA methylation	14/6993	19/19652	0.000811467	0.00937458	0.00747404	AT5G04560/AT2G36490/AT2G27040/AT1G69770/AT1G15215/AT5G04290/AT3G48670/AT5G14620/AT2G40030/AT2G30280/AT2G32940/AT3G17310/AT4G26170/AT2G16390	14
GO:0007033	vacuole organization	15/6993	21/19652	0.000891301	0.0101631	0.00810274	AT4G33240/AT2G26890/AT1G77220/AT1G17260/AT2G38020/AT3G14270/AT2G01690/AT1G03060/AT5G04920/AT4G36630/AT1G15130/AT3G54860/AT4G22880/AT2G28390/AT4G38360	15
GO:0005991	trehalose metabolic process	10/6993	12/19652	0.000981869	0.0110523	0.00881165	AT1G78580/AT1G67140/AT4G24040/AT1G68020/AT1G60140/AT2G18700/AT1G70290/AT1G06410/AT1G23870/AT4G27550	10
GO:0005975	carbohydrate metabolic process	224/6993	534/19652	0.00119136	0.0132407	0.0105564	AT1G27520/AT3G06500/AT3G45940/AT4G24450/AT4G30310/AT1G14970/AT2G22620/AT2G36390/AT5G26000/AT1G18270/AT5G46340/AT1G67140/AT3G09920/AT2G41540/AT4G09020/AT1G10760/AT1G56710/AT4G38650/AT5G13870/AT5G43710/AT4G26140/AT5G25980/AT1G09910/AT2G39930/AT5G22510/AT1G58370/AT5G44480/AT1G61810/AT1G35510/AT3G13790/AT1G07110/AT3G52840/AT3G23640/AT1G22460/AT1G67490/AT3G62710/AT2G45880/AT5G12960/AT4G10180/AT3G20040…	224
GO:0016573	histone acetylation	11/6993	14/19652	0.00129157	0.0138293	0.0110256	AT3G12980/AT1G55970/AT1G79000/AT1G16710/AT5G09740/AT3G54610/AT3G33520/AT1G67220/AT1G49540/AT3G19040/AT4G14385	11
GO:0048589	developmental growth	11/6993	14/19652	0.00129157	0.0138293	0.0110256	AT1G63490/AT5G01270/AT1G08620/AT2G36850/AT5G60410/AT5G13530/AT5G53460/AT3G07160/AT4G20400/AT2G28350/AT1G71800	11
GO:0071482	cellular response to light stimulus	11/6993	14/19652	0.00129157	0.0138293	0.0110256	AT2G36390/AT3G53920/AT2G36990/AT2G48120/AT2G30170/AT5G13730/AT1G64860/AT5G03650/AT1G08540/AT5G24120/AT3G08550	11
GO:0009555	pollen development	106/6993	235/19652	0.00155136	0.0164107	0.0130837	AT1G79950/AT4G02460/AT2G35060/AT4G35420/AT4G00800/AT1G42470/AT3G10405/AT3G43210/AT3G63480/AT5G05570/AT1G08600/AT3G18000/AT3G03110/AT4G33240/AT5G64560/AT5G01450/AT5G15470/AT2G03060/AT4G20060/AT1G05960/AT4G39110/AT2G38185/AT2G36850/AT4G29380/AT1G34355/AT3G14270/AT5G17310/AT4G04970/AT4G31610/AT3G07160/AT5G58270/AT1G72440/AT2G01690/AT1G18370/AT1G65470/AT1G49340/AT2G33420/AT3G07610/AT1G01690/AT3G10490…	106
GO:0071805	potassium ion transmembrane transport	29/6993	52/19652	0.00229355	0.0235286	0.0187585	AT2G35060/AT2G23980/AT4G00630/AT5G11800/AT2G19600/AT1G30270/AT2G01980/AT2G30070/AT1G05580/AT4G22200/AT1G31120/AT5G13750/AT5G37500/AT1G30450/AT1G60160/AT1G01790/AT2G25600/AT5G51710/AT4G19960/AT4G32650/AT4G33530/AT5G09400/AT5G14880/AT1G70300/AT4G01840/AT1G32450/AT3G02850/AT4G10310/AT2G40540	29
GO:0009903	chloroplast avoidance movement	9/6993	11/19652	0.00232393	0.0235286	0.0187585	AT5G38150/AT5G65460/AT1G75100/AT3G45780/AT2G26570/AT5G10470/AT1G42550/AT1G66840/AT5G20610	9
GO:0051171	regulation of nitrogen compound metabolic process	9/6993	11/19652	0.00232393	0.0235286	0.0187585	AT4G27910/AT3G59410/AT3G07740/AT5G53430/AT3G61740/AT4G16420/AT5G09790/AT4G34430/AT3G03910	9
GO:0006260	DNA replication	49/6993	98/19652	0.00233142	0.0235286	0.0187585	AT1G66730/AT1G79950/AT1G67500/AT5G63960/AT1G31360/AT4G32700/AT3G20540/AT4G24790/AT5G55300/AT5G22010/AT5G57160/AT1G14460/AT1G08260/AT1G50840/AT1G78650/AT5G44740/AT5G67100/AT1G08840/AT4G18820/AT2G02480/AT5G22110/AT1G19080/AT1G10520/AT1G65470/AT5G44785/AT1G79150/AT1G08130/AT2G07690/AT5G16690/AT4G29910/AT5G52950/AT3G28730/AT1G10930/AT1G47720/AT1G49250/AT2G20980/AT5G44635/AT5G45720/AT2G27120/AT4G10710…	49
GO:0048544	recognition of pollen	23/6993	39/19652	0.00241327	0.0238073	0.0189807	AT4G03230/AT1G11280/AT1G61500/AT1G61430/AT1G61490/AT3G49500/AT1G61370/AT1G61360/AT1G11350/AT1G11410/AT1G61400/AT1G61380/AT1G61460/AT1G61420/AT1G11300/AT4G27300/AT1G61610/AT1G61440/AT1G34300/AT1G11303/AT1G61550/AT4G21390/AT1G61390	23
GO:0080092	regulation of pollen tube growth	23/6993	39/19652	0.00241327	0.0238073	0.0189807	AT2G03060/AT4G39110/AT3G07160/AT2G31500/AT3G20190/AT5G56040/AT2G07040/AT5G12180/AT1G18750/AT1G31650/AT2G25790/AT3G13400/AT5G19360/AT3G42880/AT1G79860/AT4G13240/AT2G32460/AT2G13680/AT1G50610/AT1G77980/AT2G33775/AT1G22130/AT4G26930	23
GO:0060320	rejection of self pollen	28/6993	50/19652	0.00249899	0.0243791	0.0194366	AT1G56385/AT3G57840/AT5G04047/AT3G54925/AT3G55252/AT2G23142/AT1G04645/AT2G06090/AT3G24065/AT5G26090/AT4G24974/AT1G11765/AT2G23148/AT1G26795/AT3G24068/AT3G55665/AT5G27238/AT3G17080/AT4G24975/AT3G55254/AT5G04347/AT1G51250/AT5G26050/AT3G26860/AT5G04350/AT5G12060/AT5G38435/AT5G12070	28
GO:0009626	plant-type hypersensitive response	39/6993	75/19652	0.00257437	0.0248384	0.0198028	AT1G32540/AT1G30460/AT4G12560/AT4G02640/AT1G02120/AT5G18370/AT4G19040/AT5G51450/AT5G44870/AT5G45250/AT4G36290/AT4G03110/AT1G26190/AT4G20400/AT5G50260/AT1G71220/AT1G64280/AT4G12010/AT4G24290/AT4G36280/AT1G12220/AT4G25230/AT5G45890/AT3G25070/AT3G12500/AT3G50930/AT3G48090/AT1G28380/AT1G02860/AT4G20380/AT3G46530/AT1G14780/AT4G18470/AT3G01420/AT1G08450/AT2G47130/AT5G26920/AT3G45640/AT1G33560	39
GO:0019252	starch biosynthetic process	20/6993	33/19652	0.00293346	0.0279954	0.0223198	AT1G11720/AT2G36390/AT4G18240/AT3G30720/AT5G65685/AT2G39930/AT1G27070/AT5G19220/AT5G04360/AT5G03420/AT3G20440/AT3G59480/AT5G03650/AT4G39210/AT3G16000/AT1G06020/AT4G32190/AT1G06030/AT5G51820/AT2G21590	20
GO:0000165	MAPK cascade	25/6993	44/19652	0.00321568	0.0300359	0.0239466	AT4G08470/AT1G53510/AT1G08720/AT4G08480/AT1G53570/AT2G01450/AT2G42880/AT5G19010/AT5G66850/AT3G18040/AT1G63700/AT1G54960/AT3G14720/AT2G46070/AT1G09000/AT5G40440/AT1G07880/AT4G36450/AT4G08500/AT1G73670/AT1G77720/AT1G59580/AT1G01560/AT1G10210/AT3G45640	25
GO:0000724	double-strand break repair via homologous recombination	25/6993	44/19652	0.00321568	0.0300359	0.0239466	AT5G24280/AT5G07660/AT5G01630/AT1G67500/AT5G61460/AT5G16630/AT3G05210/AT5G22750/AT5G41150/AT5G15920/AT3G02680/AT4G30870/AT4G00020/AT4G21070/AT3G19210/AT1G65470/AT3G09660/AT3G13782/AT5G64520/AT3G18730/AT1G35530/AT1G10930/AT1G14750/AT5G64630/AT3G13170	25
GO:0030036	actin cytoskeleton organization	17/6993	27/19652	0.00341783	0.0315631	0.0251642	AT2G34150/AT4G15200/AT1G29170/AT2G38440/AT4G18600/AT5G35700/AT5G18410/AT3G13870/AT3G27000/AT5G54650/AT1G24150/AT3G05470/AT5G67470/AT1G59910/AT5G01730/AT3G25500/AT1G70140	17
GO:0000723	telomere maintenance	12/6993	17/19652	0.00352299	0.0315631	0.0251642	AT4G09680/AT1G79950/AT2G05210/AT2G31970/AT1G48050/AT3G48900/AT4G30870/AT1G16970/AT5G13820/AT5G06310/AT5G16850/AT2G04395	12
GO:0048268	clathrin coat assembly	12/6993	17/19652	0.00352299	0.0315631	0.0251642	AT1G03050/AT5G35200/AT4G02650/AT1G14910/AT1G25240/AT1G68110/AT2G01600/AT1G33340/AT5G65370/AT5G57200/AT4G25940/AT1G05020	12
GO:0071230	cellular response to amino acid stimulus	12/6993	17/19652	0.00352299	0.0315631	0.0251642	AT1G05200/AT3G07520/AT5G27100/AT3G51480/AT4G35290/AT2G17260/AT1G42540/AT2G32390/AT5G48400/AT2G32400/AT4G31710/AT5G11210	12
GO:0010492	maintenance of shoot apical meristem identity	13/6993	19/19652	0.00364413	0.0323186	0.0257665	AT5G01770/AT5G19310/AT3G06010/AT1G03770/AT3G08850/AT4G11920/AT5G44280/AT4G37750/AT2G25180/AT3G07780/AT3G16857/AT5G10510/AT5G48160	13
GO:0009910	negative regulation of flower development	23/6993	40/19652	0.0037822	0.0332077	0.0264754	AT5G65050/AT1G30970/AT2G31650/AT5G65060/AT3G04240/AT1G79280/AT5G61150/AT5G16260/AT5G23150/AT5G11530/AT5G51230/AT5G60410/AT5G60800/AT1G79730/AT5G17690/AT1G61040/AT4G20400/AT3G33520/AT3G05040/AT5G49160/AT4G00650/AT5G65070/AT5G13790	23
GO:0006508	proteolysis	207/6993	501/19652	0.0040873	0.0355312	0.0283278	AT4G22050/AT3G57470/AT1G10570/AT2G22980/AT4G21326/AT3G54720/AT1G02300/AT1G31450/AT2G24280/AT1G35340/AT5G53170/AT1G69100/AT1G28320/AT2G22990/AT3G20210/AT5G19740/AT1G33360/AT3G26085/AT1G71696/AT4G30910/AT5G53350/AT1G73310/AT1G73990/AT5G65450/AT2G40930/AT4G21640/AT1G05840/AT5G19660/AT1G60220/AT5G44530/AT3G46850/AT2G35615/AT3G50050/AT5G49840/AT5G66960/AT1G80210/AT2G21430/AT5G67170/AT3G04340/AT4G20430…	207
GO:0009791	post-embryonic development	34/6993	65/19652	0.00416748	0.035873	0.0286004	AT4G04350/AT1G50030/AT1G17580/AT4G15180/AT1G25350/AT5G55300/AT3G27530/AT5G20490/AT5G11530/AT5G16715/AT1G14610/AT5G27030/AT2G25420/AT5G13570/AT1G55180/AT3G16830/AT3G15880/AT1G15750/AT5G49030/AT3G13300/AT2G32410/AT3G20440/AT4G27630/AT1G80490/AT4G13780/AT1G64990/AT4G10320/AT2G30280/AT5G57390/AT2G25840/AT5G09530/AT4G39100/AT1G18560/AT3G01570	34
GO:0050832	defense response to fungus	199/6993	481/19652	0.00448418	0.0382243	0.030475	AT2G32240/AT2G24693/AT2G21465/AT3G12140/AT3G01310/AT3G59660/AT5G26980/AT3G48231/AT2G22300/AT1G59820/AT3G24510/AT4G16990/AT3G19190/AT2G46240/AT5G16453/AT5G38330/AT5G48605/AT2G44950/AT2G34930/AT1G61560/AT4G08869/AT1G60985/AT3G13790/AT5G26170/AT1G09770/AT5G44030/AT5G55390/AT5G42950/AT5G02310/AT2G36490/AT5G50423/AT1G20380/AT5G60280/AT5G44973/AT3G11240/AT5G47910/AT5G13010/AT1G76040/AT5G18403/AT3G62770…	199
GO:0044238	primary metabolic process	33/6993	63/19652	0.00459066	0.0387558	0.0308987	AT5G35170/AT2G42330/AT3G28030/AT3G02030/AT1G07745/AT4G21060/AT5G05570/AT5G41120/AT5G41130/AT3G26840/AT3G43840/AT4G16130/AT4G31050/AT1G26810/AT1G54570/AT1G01220/AT2G21070/AT5G08550/AT2G42780/AT5G47840/AT3G13440/AT3G06580/AT3G20930/AT5G44780/AT3G10700/AT5G24490/AT1G53260/AT1G17070/AT5G09210/AT5G54930/AT3G06440/AT1G27120/AT3G26820	33
GO:0000045	autophagosome assembly	8/6993	10/19652	0.0054115	0.0431936	0.0344368	AT4G30790/AT3G19190/AT3G49590/AT5G66930/AT3G61710/AT3G50590/AT1G54210/AT3G18770	8
GO:0006820	monoatomic anion transport	8/6993	10/19652	0.0054115	0.0431936	0.0344368	AT3G06450/AT4G32510/AT2G47160/AT5G25430/AT1G74810/AT1G12480/AT1G15460/AT2G17010	8
GO:0010239	chloroplast mRNA processing	8/6993	10/19652	0.0054115	0.0431936	0.0344368	AT5G27270/AT1G30610/AT2G48120/AT2G04270/AT5G08720/AT2G35130/AT5G42310/AT2G41720	8
GO:0036297	interstrand cross-link repair	8/6993	10/19652	0.0054115	0.0431936	0.0344368	AT1G79950/AT1G48360/AT5G65740/AT5G08110/AT5G22750/AT5G03450/AT1G35530/AT5G50930	8
GO:0060236	regulation of mitotic spindle organization	8/6993	10/19652	0.0054115	0.0431936	0.0344368	AT1G03780/AT4G22860/AT4G11990/AT5G15510/AT5G05970/AT5G62240/AT5G07170/AT3G01015	8
GO:0080090	regulation of primary metabolic process	8/6993	10/19652	0.0054115	0.0431936	0.0344368	AT4G27910/AT3G59410/AT3G07740/AT5G53430/AT3G61740/AT4G16420/AT5G09790/AT4G34430	8
GO:0009860	pollen tube growth	59/6993	126/19652	0.00598717	0.047358	0.0377569	AT5G64070/AT1G68990/AT3G56960/AT5G09350/AT1G04950/AT3G18000/AT3G19020/AT3G03110/AT5G15470/AT3G45100/AT2G41210/AT1G50120/AT1G49490/AT4G24580/AT5G35700/AT1G03050/AT1G72150/AT5G49680/AT4G33970/AT3G12690/AT1G73430/AT4G02650/AT5G55810/AT2G07040/AT2G33460/AT1G54280/AT1G71270/AT1G48020/AT3G20580/AT1G08730/AT2G47040/AT1G08660/AT3G01700/AT5G17020/AT1G54560/AT5G11980/AT5G14870/AT3G13900/AT1G03010/AT4G29460…	59
GO:0042254	ribosome biogenesis	47/6993	97/19652	0.00610297	0.0478429	0.0381436	AT3G01540/AT5G08420/AT5G66540/AT1G17690/AT1G10300/AT5G37350/AT1G69070/AT2G40360/AT1G29940/AT1G06720/AT1G06560/AT3G12080/AT3G11964/AT2G48120/AT4G26600/AT2G40430/AT3G06530/AT1G13160/AT1G63980/AT3G21540/AT3G57660/AT5G18570/AT3G06480/AT1G79150/AT3G19800/AT5G46420/AT5G55920/AT1G42440/AT2G24990/AT1G52980/AT4G25730/AT2G17250/AT4G31520/AT1G26530/AT1G55150/AT2G25870/AT1G03530/AT1G12650/AT1G51380/AT5G39960…	47
GO:0006378	mRNA polyadenylation	9/6993	12/19652	0.0063501	0.0484816	0.0386528	AT1G30460/AT5G13480/AT2G43410/AT1G66500/AT5G43620/AT2G36480/AT5G40490/AT4G29820/AT5G23880	9
GO:0007064	mitotic sister chromatid cohesion	9/6993	12/19652	0.0063501	0.0484816	0.0386528	AT1G80810/AT1G61030/AT5G47690/AT4G31880/AT1G11060/AT1G77600/AT1G15940/AT5G10950/AT5G51340	9
GO:0080113	regulation of seed growth	9/6993	12/19652	0.0063501	0.0484816	0.0386528	AT1G17145/AT1G78420/AT1G19270/AT2G25180/AT5G49660/AT3G16857/AT2G35230/AT4G25350/AT3G11580	9
GO:0016571	histone methylation	14/6993	22/19652	0.00681043	0.0499874	0.0398532	AT1G76710/AT5G22450/AT2G23380/AT4G29790/AT2G35160/AT5G11530/AT4G16420/AT1G79730/AT3G33520/AT5G13960/AT2G19390/AT2G22740/AT2G24740/AT2G33290	14
GO:0042127	regulation of cell population proliferation	14/6993	22/19652	0.00681043	0.0499874	0.0398532	AT1G69220/AT4G14713/AT4G16420/AT1G55350/AT1G63980/AT4G37750/AT3G26090/AT2G26300/AT5G55920/AT1G11130/AT5G13060/AT3G20630/AT5G50915/AT1G44900	14
GO:0010090	trichome morphogenesis	21/6993	37/19652	0.00682654	0.0499874	0.0398532	AT5G45190/AT1G17580/AT1G05230/AT2G38440/AT5G20490/AT5G24630/AT5G43900/AT4G01800/AT3G16630/AT2G46225/AT5G24310/AT5G18410/AT1G03060/AT3G27000/AT1G19835/AT2G35110/AT4G19600/AT1G30825/AT3G12280/AT5G22220/AT2G41940	21
GO:0005982	starch metabolic process	10/6993	14/19652	0.00688892	0.0499874	0.0398532	AT2G36390/AT4G18240/AT1G67140/AT5G22510/AT3G22380/AT5G26570/AT5G03650/AT5G49190/AT4G02280/AT3G52180	10
GO:0006996	organelle organization	10/6993	14/19652	0.00688892	0.0499874	0.0398532	AT2G31970/AT4G30790/AT4G28080/AT1G63900/AT3G52140/AT1G15290/AT1G01320/AT1G54150/AT1G77720/AT1G59560	10
GO:0031349	positive regulation of defense response	10/6993	14/19652	0.00688892	0.0499874	0.0398532	AT1G19100/AT1G25540/AT4G36290/AT4G08850/AT4G24970/AT5G50780/AT4G36280/AT1G49540/AT1G02660/AT5G13130	10

## Sheet: Col-0 hAT DOWN
ID	Description	GeneRatio	BgRatio	pvalue	p.adjust	qvalue	geneID	Count
GO:0006412	translation	362/6182	681/19652	6.35935e-33	5.51355e-30	4.67914e-30	AT5G60390/AT1G07930/AT3G13920/AT1G56070/AT3G49910/AT4G31700/AT2G24090/AT3G05590/AT1G70600/AT5G17870/AT3G27850/AT4G15000/AT2G18020/AT5G02870/AT5G59850/AT2G37270/AT1G57720/AT1G07940/AT2G39460/AT1G35680/AT1G07920/AT5G40950/AT2G47110/AT4G36130/AT1G75350/AT5G64140/AT3G62250/AT3G22230/AT3G55280/AT1G04270/AT4G01310/AT3G09630/AT3G54210/AT3G04840/AT5G16130/AT5G07090/AT3G03600/AT1G68590/AT1G72730/AT3G53430…	362
GO:0015979	photosynthesis	124/6182	167/19652	4.93733e-30	2.14033e-27	1.81642e-27	AT2G05100/AT5G66570/AT2G05070/AT4G09650/AT1G29930/AT1G67090/AT3G27690/AT1G29920/AT4G10340/AT4G02770/AT1G53310/AT1G44575/AT5G38410/AT1G29910/AT1G74470/AT1G52230/AT4G28660/AT3G21055/AT5G54270/AT1G67740/AT4G12800/AT3G54890/AT2G06520/AT3G54110/AT1G20950/AT1G55670/AT4G14690/AT2G20890/AT1G31330/AT2G30570/AT3G02780/AT5G01530/AT1G15820/AT1G61520/AT1G79040/AT3G56090/AT5G38430/AT1G08380/AT4G21280/AT3G08940…	124
GO:0009409	response to cold	171/6182	332/19652	1.6884e-14	4.87947e-12	4.14102e-12	AT2G26250/AT4G34710/AT4G24960/AT3G47520/AT4G39730/AT1G56070/AT5G38480/AT2G05100/AT1G53240/AT3G17390/AT2G05070/AT4G09650/AT1G67090/AT3G27690/AT2G36530/AT5G12250/AT2G39460/AT3G52150/AT2G01570/AT5G54770/AT5G15090/AT1G09780/AT3G55280/AT1G35720/AT1G68530/AT3G12780/AT2G37220/AT2G33800/AT4G38680/AT5G38470/AT2G42540/AT2G16280/AT3G17020/AT3G54890/AT5G65020/AT5G58070/AT4G24770/AT4G38840/AT3G11630/AT2G20990…	171
GO:0008652	amino acid biosynthetic process	96/6182	159/19652	4.63068e-14	1.0037e-11	8.51801e-12	AT1G75500/AT1G22410/AT4G34200/AT3G13110/AT1G62180/AT2G17265/AT2G43090/AT1G80600/AT2G17630/AT3G58610/AT4G21990/AT4G04610/AT3G48560/AT3G57560/AT4G24830/AT4G29840/AT1G17745/AT3G20390/AT4G14880/AT3G27740/AT5G10920/AT2G37250/AT1G15710/AT2G26400/AT4G35630/AT3G44720/AT3G01120/AT2G43750/AT2G45440/AT2G45300/AT3G53580/AT3G54640/AT2G27820/AT5G54810/AT1G48860/AT3G59760/AT5G17920/AT1G75330/AT4G33510/AT3G59890…	96
GO:0006633	fatty acid biosynthetic process	77/6182	121/19652	3.01536e-13	5.22864e-11	4.43735e-11	AT2G26250/AT2G43710/AT5G10480/AT1G30120/AT1G54630/AT1G68530/AT1G11600/AT1G67730/AT3G55360/AT2G33150/AT2G16280/AT1G24360/AT1G76680/AT2G05990/AT3G15850/AT1G65290/AT1G10670/AT3G05020/AT5G48880/AT1G06350/AT2G44620/AT2G22230/AT1G54580/AT5G16240/AT5G04530/AT5G46290/AT2G15090/AT4G30950/AT2G26640/AT4G25050/AT1G01120/AT1G66430/AT1G19440/AT3G02630/AT1G06080/AT1G19640/AT2G31360/AT1G62640/AT5G42650/AT5G51830…	77
GO:0009853	photorespiration	40/6182	53/19652	5.50983e-11	7.9617e-09	6.75679e-09	AT1G47260/AT1G67090/AT5G38410/AT5G37510/AT4G16450/AT5G66510/AT1G32080/AT3G54110/AT5G63510/AT2G33220/AT1G49140/AT5G52840/AT1G79870/AT2G13360/AT5G38430/AT1G67350/AT2G27730/AT1G23310/AT4G34700/AT2G02050/AT4G00585/AT3G18410/AT3G48680/AT1G04630/AT1G19580/AT2G31490/AT3G12290/AT2G47690/AT1G14450/AT3G14420/AT1G12550/AT5G38420/ATCG00490/AT1G68010/AT4G00620/AT3G14415/AT4G39660/AT5G47435/AT4G37930/AT5G60335	40
GO:0006099	tricarboxylic acid cycle	42/6182	60/19652	9.58714e-10	1.0459e-07	8.87612e-08	AT1G04410/AT3G47520/AT1G53240/AT2G46505/AT1G53310/AT2G20420/AT5G58330/AT5G08300/AT4G35260/AT1G08480/AT3G47833/AT1G10670/AT3G15020/AT5G49460/AT3G58750/AT2G22780/AT1G47420/AT5G09660/AT2G46390/AT1G65930/AT5G62575/AT5G03290/AT4G32210/AT5G23250/AT4G26910/AT5G40650/AT5G55070/AT3G09810/AT2G17130/AT3G27380/AT5G09600/AT1G09430/AT5G51040/AT2G44350/AT1G60810/AT5G43330/AT2G47510/AT2G42600/AT5G56720/AT3G06650…	42
GO:0006631	fatty acid metabolic process	84/6182	152/19652	9.65071e-10	1.0459e-07	8.87612e-08	AT2G43710/AT5G10480/AT1G54630/AT1G67730/AT3G55360/AT4G14440/AT1G63710/AT2G33150/AT2G45970/AT1G01600/AT1G24360/AT1G76680/AT2G05990/AT3G15850/AT1G65290/AT3G05020/AT5G48880/AT3G12800/AT1G06350/AT2G44620/AT1G54580/AT5G16240/AT5G46290/AT3G15730/AT4G30950/AT4G05530/AT4G25050/AT5G43280/AT1G65520/AT3G02630/AT1G06080/AT4G32770/AT1G19640/AT2G31360/AT4G14430/AT1G62640/AT5G42650/AT5G35360/AT4G00360/AT3G12120…	84
GO:0022900	electron transport chain	57/6182	93/19652	2.83957e-09	2.73546e-07	2.32148e-07	AT1G60950/AT5G13430/AT5G13440/AT5G08530/AT5G40810/AT3G27240/AT5G11770/AT2G02850/AT4G02580/AT4G31840/AT1G20340/AT5G67590/AT4G27520/AT4G10040/AT1G72230/AT1G76100/AT4G12880/AT1G10960/AT1G64640/AT5G17770/AT5G15350/AT2G02510/AT1G79010/AT5G18400/AT2G27510/AT1G16700/AT2G25060/AT5G25090/AT4G32210/AT1G22840/AT1G14450/AT5G40650/AT3G27380/AT5G09600/AT1G32550/AT5G20230/AT4G05450/AT4G30590/AT2G04700/ATCG00210…	57
GO:0009765	photosynthesis, light harvesting	20/6182	22/19652	1.00136e-08	8.68179e-07	7.3679e-07	AT2G05100/AT2G05070/AT1G29930/AT3G27690/AT1G29920/AT4G10340/AT1G29910/AT5G54270/AT3G54890/AT5G01530/AT1G15820/AT1G61520/AT3G08940/AT2G40100/AT3G47470/AT1G45474/AT3G61470/AT2G21970/AT2G34430/AT1G19150	20
GO:0006096	glycolytic process	45/6182	71/19652	3.02124e-08	2.38128e-06	2.0209e-06	AT3G04120/AT3G52930/AT1G13440/AT3G55440/AT4G38970/AT2G36530/AT5G08570/AT1G30120/AT2G01140/AT1G09780/AT3G12780/AT1G79550/AT1G01090/AT1G20950/AT1G56190/AT4G29130/AT3G52990/AT1G34430/AT5G56350/AT1G79530/AT5G63680/AT2G21330/AT1G59900/AT3G22960/AT3G25860/AT2G34590/AT5G50850/AT2G21170/AT5G42740/AT2G36460/AT3G08590/AT4G26530/AT1G24180/AT1G74030/AT1G12000/AT2G19860/AT5G52920/AT2G36580/AT1G16300/AT5G56630…	45
GO:0006629	lipid metabolic process	229/6182	541/19652	4.46105e-08	3.22311e-06	2.73533e-06	AT2G43710/AT3G04290/AT4G39800/AT5G10480/AT5G33370/AT3G61580/AT3G63200/AT1G58430/AT1G11910/AT1G54630/AT3G47350/AT1G20050/AT1G67730/AT2G42990/AT2G04570/AT3G55360/AT1G11680/AT4G14440/AT2G33150/AT1G20330/AT5G45950/AT1G24360/AT4G28780/AT1G73650/AT5G59500/AT5G58070/AT1G76680/AT1G75900/AT2G05990/AT3G15850/AT1G29670/AT1G65290/AT1G10670/AT3G05020/AT4G18970/AT5G48880/AT2G22240/AT3G14220/AT4G00400/AT3G12800…	229
GO:0009644	response to high light intensity	32/6182	45/19652	5.3283e-08	3.55356e-06	3.01577e-06	AT2G05100/AT2G05070/AT3G18780/AT3G27690/AT2G39460/AT3G55280/AT2G47450/AT5G54270/AT2G42540/AT3G54890/AT5G58070/AT1G61520/AT2G05620/AT4G32770/AT5G02120/AT3G47470/AT4G34190/AT5G61510/AT1G45474/AT3G61470/AT3G28910/AT2G17840/AT1G55480/AT3G47860/AT5G61230/AT1G01470/AT4G17490/AT2G42080/AT5G04410/AT1G32070/AT2G41430/AT4G08920	32
GO:0051603	proteolysis involved in protein catabolic process	25/6182	33/19652	2.12362e-07	1.31513e-05	1.1161e-05	AT3G27430/AT3G51260/AT1G56450/AT4G31300/AT3G22110/AT2G27020/AT3G60820/AT4G14800/AT1G13060/AT1G21720/AT3G14290/AT5G40580/AT5G42790/AT3G22630/AT1G79210/AT1G47250/AT2G05840/AT3G26340/AT1G16470/AT1G53850/AT1G77440/AT5G66140/AT5G35590/AT5G60360/AT5G51740	25
GO:0015031	protein transport	254/6182	620/19652	2.43419e-07	1.40696e-05	1.19403e-05	AT2G34250/AT5G09810/AT2G03820/AT1G29310/AT5G17190/AT3G09840/AT1G56330/AT2G47840/AT2G45070/AT1G27390/AT1G27310/AT1G07140/AT4G24920/AT4G02080/AT2G30050/AT4G16143/AT1G27330/AT1G27970/AT5G24650/AT3G22845/AT5G50460/AT1G30630/AT1G04070/AT5G28750/AT3G27080/AT5G13850/AT1G48440/AT4G10480/AT2G17980/AT3G20000/AT5G20010/AT5G43970/AT1G27350/AT1G61570/AT1G10630/AT5G55190/AT5G41685/AT2G37410/AT5G45750/AT1G02130…	254
GO:0007017	microtubule-based process	22/6182	28/19652	3.86379e-07	2.09369e-05	1.77683e-05	AT5G44340/AT5G62700/AT4G14960/AT2G29550/AT5G12250/AT5G19770/AT5G62690/AT1G04820/AT5G19780/AT1G20010/AT4G20890/AT1G50010/AT1G23220/AT5G23860/AT1G75780/AT5G55280/AT4G15930/AT3G61650/AT3G16120/AT1G64740/AT4G27360/AT5G05620	22
GO:0019253	reductive pentose-phosphate cycle	18/6182	21/19652	4.13228e-07	2.10746e-05	1.78852e-05	AT1G67090/AT5G38410/AT3G04790/AT3G12780/AT1G12900/AT1G56190/AT3G55800/AT5G38430/AT1G42970/AT2G21170/AT3G54050/AT3G62410/AT3G26650/AT2G47400/AT3G60750/AT5G38420/ATCG00490/AT5G61410	18
GO:0015986	proton motive force-driven ATP synthesis	25/6182	35/19652	1.37619e-06	6.62863e-05	5.62546e-05	AT5G08690/AT4G09650/AT5G47030/AT2G33040/AT5G13450/AT1G51650/AT1G78900/AT4G29480/AT4G00895/AT3G52300/AT4G04640/AT2G19680/AT5G08670/AT4G26210/AT3G01390/ATCG00470/AT4G32260/ATCG00480/AT5G08680/ATMG01170/AT2G07698/ATMG00040/ATCG00150/ATCG00140/AT2G21410	25
GO:0006457	protein folding	67/6182	130/19652	1.45625e-06	6.64509e-05	5.63943e-05	AT5G02500/AT5G42980/AT3G18190/AT4G38740/AT5G56010/AT5G56030/AT3G11830/AT3G44110/AT4G34870/AT3G09440/AT2G28000/AT5G20890/AT1G14980/AT5G07960/AT3G62030/AT3G56070/AT2G16600/AT3G03960/AT5G26360/AT5G07340/AT5G56000/AT4G35450/AT1G49245/AT5G20720/AT5G49510/AT4G34960/AT1G24510/AT2G29960/AT1G23100/AT5G22060/AT5G13120/AT4G37910/AT5G17710/AT5G58710/AT4G26780/AT2G21130/AT3G60210/AT5G23290/AT2G44650/AT3G08910…	67
GO:0006833	water transport	18/6182	23/19652	5.17876e-06	0.000220199	0.000186874	AT2G36830/AT3G54820/AT2G39010/AT4G00430/AT3G16240/AT4G35100/AT1G01620/AT3G53420/AT3G04090/AT2G16850/AT5G18290/AT3G61430/AT2G45960/AT4G23400/AT3G26520/AT4G01470/AT4G19030/AT2G37180	18
GO:0010043	response to zinc ion	29/6182	45/19652	5.33353e-06	0.000220199	0.000186874	AT1G04410/AT3G55440/AT1G19570/AT1G21750/AT1G57720/AT3G09200/AT4G38220/AT4G31300/AT2G01520/AT2G30860/AT3G10920/AT2G23150/AT3G07720/AT1G65930/AT2G32520/AT3G02570/AT5G17920/AT1G16470/AT4G35040/AT2G16770/AT5G35590/AT5G03630/AT3G14310/AT5G01600/AT2G46800/AT1G52760/AT4G31510/AT1G67070/AT5G21940	29
GO:0042761	very long-chain fatty acid biosynthetic process	15/6182	18/19652	8.29802e-06	0.000327017	0.000277527	AT5G10480/AT4G24510/AT1G67730/AT5G47120/AT1G01120/AT1G06080/AT2G31360/AT1G43580/AT2G32720/AT3G28910/AT3G23840/AT3G25540/AT1G13580/AT3G06470/AT4G36830	15
GO:0009768	photosynthesis, light harvesting in photosystem I	10/6182	10/19652	9.44179e-06	0.000355914	0.000302051	AT2G05100/AT2G05070/AT3G27690/AT3G54890/AT1G61520/AT1G08380/AT3G47470/AT1G45474/AT3G61470/AT1G19150	10
GO:0009416	response to light stimulus	67/6182	136/19652	1.07182e-05	0.000387194	0.000328596	AT2G26250/AT5G09810/AT4G38740/AT2G05100/AT2G05070/AT3G27690/AT2G36530/AT3G49120/AT3G49110/AT1G68530/AT1G31580/AT2G42540/AT2G16280/AT1G79550/AT5G58070/AT4G14690/AT5G04530/AT4G35090/AT1G06040/AT1G42970/AT1G43560/AT4G25130/AT2G26640/AT4G25050/AT1G01120/AT1G26945/AT2G39730/AT2G47460/AT3G02570/AT3G22840/AT3G51080/AT1G07720/AT5G07470/AT1G75780/AT3G62410/AT4G36240/AT3G26650/AT3G60530/AT4G01900/AT1G55480…	67
GO:0002183	cytoplasmic translational initiation	17/6182	22/19652	1.2997e-05	0.000437397	0.000371202	AT3G13920/AT4G33250/AT5G44320/AT2G39990/AT3G11400/AT3G57290/AT2G46280/AT4G20980/AT1G10840/AT5G25757/AT2G46290/AT5G37475/AT3G02200/AT1G66070/AT5G25754/AT5G06000/AT3G56150	17
GO:0009631	cold acclimation	32/6182	53/19652	1.31169e-05	0.000437397	0.000371202	AT1G56070/AT5G38480/AT2G15970/AT4G38680/AT2G42540/AT4G24770/AT5G67590/AT3G53460/AT1G29390/AT5G49510/AT4G13850/AT4G29810/AT4G04800/AT2G24500/AT5G23290/AT4G36020/AT3G14080/AT2G42530/AT1G11760/AT4G31420/AT1G08780/AT4G15910/AT5G58220/AT1G29395/AT3G50970/AT1G19120/AT1G18740/AT2G17870/AT5G15960/AT3G55580/AT5G59820/AT1G06960	32
GO:0006353	DNA-templated transcription termination	26/6182	41/19652	2.49567e-05	0.000801388	0.000680107	AT1G61980/AT4G38160/AT1G06190/AT4G02990/AT3G46950/AT2G34620/AT1G62110/AT5G64950/AT1G62085/AT1G61990/AT2G03050/AT1G61960/AT2G44020/AT1G62010/AT5G07900/AT2G22370/AT1G62150/AT1G74120/AT5G55580/AT5G06810/AT5G23930/AT4G26370/AT5G54180/AT4G09620/AT1G62120/AT3G18870	26
GO:0046686	response to cadmium ion	35/6182	62/19652	4.00181e-05	0.00123913	0.0010516	AT1G13440/AT1G75040/AT3G09200/AT5G35630/AT1G48030/AT4G23670/AT4G02930/AT2G30860/AT4G14800/AT1G68560/AT1G44810/AT4G14880/AT1G59900/AT5G26220/AT1G23190/AT3G02570/AT4G14030/AT4G25100/AT1G17290/AT5G11200/AT1G36370/AT4G04460/ATCG00490/AT1G74910/AT3G14930/AT5G24890/AT3G56240/AT5G44070/AT3G22890/AT5G11170/AT1G52760/AT4G31510/AT1G67070/AT5G11670/AT4G33010	35
GO:0006979	response to oxidative stress	115/6182	268/19652	4.72408e-05	0.00141234	0.0011986	AT5G13930/AT4G34710/AT3G04120/AT2G28190/AT1G07890/AT3G49120/AT2G39460/AT3G49110/AT4G11600/AT3G55280/AT1G08830/AT3G53260/AT1G71695/AT3G06050/AT1G27330/AT5G01410/AT1G44970/AT4G04830/AT4G21960/AT1G75280/AT1G27350/AT3G62030/AT2G37040/AT4G21860/AT1G78380/AT4G35090/AT5G54500/AT2G40880/AT4G32770/AT5G16990/AT5G26030/AT4G08390/AT2G22080/AT5G40150/AT1G32220/AT5G54810/AT3G12490/AT1G45145/AT3G60980/AT2G24150…	115
GO:0006511	ubiquitin-dependent protein catabolic process	70/6182	150/19652	6.58785e-05	0.00190389	0.00161576	AT1G75950/AT3G51260/AT2G47110/AT3G22110/AT5G42190/AT4G05050/AT2G27020/AT2G25490/AT4G02890/AT4G05320/AT5G41700/AT5G20570/AT3G14290/AT5G20620/AT3G55380/AT4G38630/AT1G10230/AT5G42790/AT1G79210/AT1G76920/AT1G47250/AT2G35635/AT4G17510/AT1G20140/AT2G47970/AT2G05840/AT5G50870/AT5G53300/AT1G16470/AT1G14400/AT5G59300/AT1G66620/AT1G16890/AT1G53850/AT3G07200/AT1G64230/AT1G65650/AT4G15420/AT5G66140/AT5G35590…	70
GO:0001732	formation of cytoplasmic translation initiation complex	16/6182	22/19652	8.35184e-05	0.00219501	0.00186282	AT4G33250/AT5G44320/AT2G39990/AT3G11400/AT3G57290/AT2G46280/AT4G20980/AT1G10840/AT5G25757/AT2G46290/AT5G37475/AT3G02200/AT1G66070/AT5G25754/AT5G06000/AT3G56150	16
GO:0006754	ATP biosynthetic process	16/6182	22/19652	8.35184e-05	0.00219501	0.00186282	AT5G08690/AT4G09650/AT5G47030/AT2G33040/AT5G13450/AT1G51650/AT4G00895/AT4G04640/AT5G08670/ATCG00470/ATCG00480/AT5G08680/ATMG01170/AT2G07698/ATCG00150/ATCG00140	16
GO:0006413	translational initiation	52/6182	105/19652	8.35473e-05	0.00219501	0.00186282	AT3G13920/AT1G72730/AT5G54760/AT1G26630/AT3G55620/AT1G04170/AT1G54270/AT4G33250/AT5G44320/AT4G11175/AT2G39990/AT1G22780/AT4G09800/AT3G11400/AT5G11900/AT3G57290/AT1G34030/AT5G35680/AT5G20920/AT2G46280/AT2G04520/AT1G77840/AT5G35620/AT4G20980/AT4G18040/AT1G10840/AT5G18110/AT5G25757/AT2G40290/AT2G46290/AT4G34110/AT5G37475/AT1G72340/AT1G69410/AT2G34970/AT2G36885/AT3G02200/AT4G39630/AT2G40780/AT1G66070…	52
GO:0008202	steroid metabolic process	21/6182	33/19652	0.000140599	0.00358527	0.00304268	AT1G20050/AT1G11680/AT1G20330/AT4G24220/AT4G11820/AT4G12110/AT1G76090/AT1G50430/AT1G10030/AT3G02580/AT3G52940/AT2G38700/AT2G34490/AT4G17190/AT5G47770/AT2G38050/AT3G54250/AT4G22755/AT4G22756/AT5G27450/AT5G13710	21
GO:0043085	positive regulation of catalytic activity	12/6182	15/19652	0.000152259	0.00377166	0.00320087	AT2G31440/AT4G03520/AT3G02730/AT1G03680/AT3G15360/AT2G34470/AT1G50320/AT1G43560/AT5G16400/AT3G51030/AT1G76760/AT2G15570	12
GO:0015995	chlorophyll biosynthetic process	25/6182	42/19652	0.000159143	0.0038327	0.00325266	AT5G18660/AT1G74470/AT3G48730/AT5G58250/AT1G10670/AT3G02780/AT2G40490/AT1G03475/AT5G63570/AT5G45930/AT5G16440/AT3G56940/AT1G69740/AT1G58290/AT4G18480/AT5G08280/AT3G21200/AT1G63970/AT3G51820/AT4G25080/AT1G03630/AT4G01690/AT3G14930/AT3G14110/AT1G78600	25
GO:0006094	gluconeogenesis	13/6182	17/19652	0.000176361	0.00412322	0.00349922	AT3G04120/AT3G52930/AT1G13440/AT3G55440/AT4G38970/AT2G01140/AT2G21330/AT5G42740/AT2G36460/AT4G26530/AT4G37870/AT1G22170/AT4G24620	13
GO:0016126	sterol biosynthetic process	24/6182	40/19652	0.000180739	0.00412322	0.00349922	AT1G20050/AT1G11680/AT1G20330/AT4G11820/AT4G12110/AT1G76090/AT2G17370/AT1G50430/AT1G10030/AT4G37760/AT3G02580/AT3G52940/AT1G58440/AT4G34640/AT5G50375/AT2G38700/AT2G34490/AT4G17190/AT5G47770/AT3G54250/AT4G22755/AT4G22756/AT5G27450/AT5G13710	24
GO:0006465	signal peptide processing	14/6182	19/19652	0.000190229	0.00412322	0.00349922	AT2G39960/AT2G22425/AT1G52600/AT4G40042/AT3G15710/AT5G27430/AT3G05230/AT1G53530/AT1G06200/AT3G24590/AT1G34640/AT2G31140/AT4G04200/AT1G29960	14
GO:0071806	protein transmembrane transport	14/6182	19/19652	0.000190229	0.00412322	0.00349922	AT1G27390/AT4G24920/AT5G50460/AT1G04070/AT3G27080/AT5G43970/AT3G48570/AT5G05000/AT1G17530/AT4G14870/AT5G40930/AT2G01110/AT1G02280/AT4G38490	14
GO:0009645	response to low light intensity stimulus	9/6182	10/19652	0.000215469	0.0044479	0.00377476	AT2G05100/AT2G05070/AT3G27690/AT3G54890/AT1G61520/AT2G06850/AT3G47470/AT1G45474/AT3G61470	9
GO:0045039	protein insertion into mitochondrial inner membrane	9/6182	10/19652	0.000215469	0.0044479	0.00377476	AT5G24650/AT2G37410/AT2G42210/AT5G55510/AT3G25120/AT3G10110/AT3G49560/AT4G26670/AT2G29530	9
GO:0071456	cellular response to hypoxia	98/6182	231/19652	0.000270176	0.0054475	0.00462309	AT4G30440/AT5G58070/AT1G76680/AT1G66080/AT3G22550/AT2G22500/AT1G67360/AT1G72430/AT2G01150/AT3G13310/AT1G13360/AT2G26660/AT2G33590/AT3G02040/AT4G33560/AT5G42200/AT5G45630/AT2G36460/AT5G13320/AT5G47060/AT3G02550/AT1G17290/AT3G15210/AT1G63090/AT1G09070/AT1G03220/AT2G41090/AT5G35735/AT5G20150/AT1G14200/AT5G64260/AT1G32928/AT3G04640/AT4G27280/AT3G03270/AT2G33585/AT5G24530/AT5G20230/AT2G36580/AT1G77120…	98
GO:0016192	vesicle-mediated transport	103/6182	245/19652	0.00028683	0.00565186	0.00479652	AT5G17190/AT3G56110/AT1G56330/AT1G04260/AT4G02080/AT2G30050/AT3G22845/AT3G13720/AT1G30630/AT2G40380/AT1G48440/AT2G17980/AT3G15480/AT1G10630/AT1G02130/AT1G70490/AT3G03160/AT4G08520/AT1G23490/AT1G57620/AT1G47830/AT3G17780/AT3G25040/AT2G38360/AT4G17530/AT1G21900/AT3G07680/AT1G04750/AT3G01340/AT5G54750/AT1G29330/AT3G12180/AT2G47170/AT4G14455/AT5G42570/AT2G20760/AT3G11730/AT5G05010/AT1G15370/AT2G44610…	103
GO:0000387	spliceosomal snRNP assembly	11/6182	14/19652	0.000391123	0.00737181	0.00625617	AT2G18740/AT3G11500/AT4G30220/AT1G76300/AT1G20580/AT4G02840/AT3G07590/AT5G62290/AT2G23930/AT4G03120/AT4G30330	11
GO:0006596	polyamine biosynthetic process	11/6182	14/19652	0.000391123	0.00737181	0.00625617	AT4G34710/AT3G02470/AT5G53120/AT1G23820/AT2G16500/AT5G15950/AT5G19530/AT5G18930/AT1G70310/AT5G08170/AT2G27450	11
GO:0009086	methionine biosynthetic process	16/6182	24/19652	0.000412089	0.00744336	0.0063169	AT2G17265/AT2G26400/AT3G01120/AT3G59970/AT5G17920/AT1G14810/AT4G38800/AT1G49820/AT3G63250/AT5G43850/AT4G14716/AT3G25900/AT5G21060/AT3G03780/AT2G05830/AT4G14710	16
GO:0045454	cell redox homeostasis	16/6182	24/19652	0.000412089	0.00744336	0.0063169	AT3G26060/AT1G67740/AT3G11630/AT3G02730/AT2G17420/AT4G35090/AT3G14395/AT5G16400/AT3G06730/AT3G24170/AT1G76080/AT5G06290/AT4G34120/AT5G10860/AT5G15230/AT2G15570	16
GO:0009269	response to desiccation	12/6182	16/19652	0.000433748	0.00767301	0.00651178	AT2G05100/AT2G05070/AT3G27690/AT4G38680/AT2G44060/AT3G44380/AT2G05520/AT1G44170/AT1G01470/AT2G46140/AT1G76180/AT1G05260	12
GO:0009767	photosynthetic electron transport chain	14/6182	20/19652	0.000450052	0.00767301	0.00651178	AT1G60950/AT4G03280/AT1G08380/AT3G21200/ATCG00280/AT5G66190/AT3G01440/AT4G33520/AT1G14150/ATCG00680/ATCG00730/ATCG00540/ATCG00580/AT4G23890	14
GO:0006108	malate metabolic process	13/6182	18/19652	0.000451353	0.00767301	0.00651178	AT1G04410/AT3G47520/AT1G53240/AT5G58330/AT3G15020/AT2G22780/AT5G09660/AT5G43330/AT2G47510/AT5G56720/AT5G12040/AT2G19900/AT5G11670	13
GO:0000413	protein peptidyl-prolyl isomerization	20/6182	33/19652	0.000517315	0.00862523	0.0073199	AT4G38740/AT4G34870/AT3G25220/AT5G48580/AT3G62030/AT3G56070/AT2G16600/AT4G34960/AT2G38730/AT2G29960/AT5G13120/AT5G58710/AT1G74070/AT2G21130/AT2G47320/AT1G01940/AT5G35100/AT1G26940/AT2G36130/AT4G17070	20
GO:0043161	proteasome-mediated ubiquitin-dependent protein catabolic process	23/6182	40/19652	0.000580771	0.00950054	0.00806275	AT5G38470/AT1G64520/AT4G29040/AT1G21720/AT3G14290/AT4G38630/AT2G47970/AT5G50870/AT3G53970/AT4G37880/AT1G53850/AT1G77440/AT4G22820/AT3G63000/AT1G23390/AT5G45100/AT1G51710/AT2G37680/AT4G19700/AT5G09630/AT3G12920/AT1G79650/AT3G21280	23
GO:0009744	response to sucrose	36/6182	72/19652	0.000782635	0.0125656	0.010664	AT3G04120/AT5G20270/AT1G20950/AT3G22550/AT2G39990/AT4G38630/AT1G42970/AT5G41670/AT5G42890/AT4G37680/AT2G24150/AT5G47060/AT3G62410/AT3G26650/AT2G47400/AT4G17670/AT1G10840/AT4G01900/AT5G20700/AT1G20840/AT4G38320/AT1G69780/AT5G61230/AT3G12700/AT2G28900/AT1G77120/AT5G65420/AT1G61800/AT5G47390/AT1G62480/AT1G16880/AT1G67070/AT1G74670/AT4G37220/AT1G19200/AT1G53885	36
GO:0000105	histidine biosynthetic process	9/6182	11/19652	0.000851221	0.0134009	0.0113729	AT2G36230/AT5G63890/AT4G14910/AT1G09795/AT3G22425/AT1G71920/AT1G31860/AT4G39120/AT5G10330	9
GO:0006807	nitrogen compound metabolic process	43/6182	90/19652	0.000865574	0.0134009	0.0113729	AT3G44310/AT2G43090/AT5G63400/AT5G35630/AT1G66200/AT5G37600/AT3G17820/AT1G65960/AT2G34470/AT3G26618/AT2G37250/AT5G11520/AT1G11430/AT2G35240/AT3G15000/AT5G28050/AT3G06790/AT1G32580/AT4G01900/AT4G20960/AT5G50370/AT5G65010/AT3G54140/AT3G58470/AT4G08790/AT1G12920/AT3G48540/AT5G18170/AT5G19550/AT5G10240/AT4G20020/AT4G28830/AT2G27450/AT4G29570/AT4G29610/AT1G29900/AT5G22300/AT1G48470/AT3G44320/AT5G12040…	43
GO:0006098	pentose-phosphate shunt	15/6182	23/19652	0.000887988	0.0135068	0.0114627	AT5G13420/AT3G04790/AT1G64190/AT3G02360/AT1G71100/AT2G01290/AT5G41670/AT3G49360/AT1G12230/AT3G27300/AT5G13110/AT5G24400/AT1G63290/AT5G61410/AT3G01850	15
GO:0019684	photosynthesis, light reaction	14/6182	21/19652	0.00095917	0.0140949	0.0119618	AT5G66570/AT1G06680/AT3G50820/ATCG00220/ATCG00020/ATCG00280/AT3G01440/ATCG00680/AT3G61320/ATCG00270/ATCG00580/ATCG00420/ATCG00440/ATCG01070	14
GO:0048229	gametophyte development	14/6182	21/19652	0.00095917	0.0140949	0.0119618	AT2G43090/AT3G48610/AT3G49080/AT3G48750/AT5G62270/AT1G11890/AT3G25100/AT3G49670/AT3G57550/AT5G60620/AT5G45550/AT3G54710/AT5G65700/AT2G26870	14
GO:0009097	isoleucine biosynthetic process	10/6182	13/19652	0.000988278	0.0142806	0.0121194	AT3G58610/AT3G48560/AT3G20390/AT1G50110/AT1G14810/AT3G10050/AT5G21060/AT3G49680/AT5G16290/AT5G65780	10
GO:0006779	porphyrin-containing compound biosynthetic process	13/6182	19/19652	0.00101712	0.0144565	0.0122687	AT3G48730/AT2G40490/AT1G03475/AT5G63570/AT1G69740/AT5G26030/AT1G58290/AT5G08280/AT4G01690/AT3G14930/AT1G50170/AT2G30390/AT5G63290	13
GO:0042546	cell wall biogenesis	30/6182	58/19652	0.00103597	0.0144703	0.0122804	AT4G03210/AT2G36870/AT2G03220/AT3G23730/AT2G06850/AT5G44670/AT5G45750/AT1G11545/AT4G39990/AT5G65730/AT2G33570/AT1G01050/AT4G18800/AT5G65270/AT3G15060/AT4G00740/AT4G14130/AT5G61840/AT5G59150/AT1G14720/AT1G07410/AT1G06400/AT2G01850/AT4G37800/AT1G02730/AT2G03210/AT1G01200/AT4G30290/AT3G01640/AT4G20170	30
GO:0006164	purine nucleotide biosynthetic process	12/6182	17/19652	0.00105148	0.0144703	0.0122804	AT4G34740/AT3G57610/AT1G09830/AT2G16570/AT3G55010/AT1G16350/AT2G35040/AT1G63660/AT1G79470/AT1G36280/AT3G21110/AT4G18440	12
GO:0006888	endoplasmic reticulum to Golgi vesicle-mediated transport	30/6182	59/19652	0.00147935	0.0200405	0.0170076	AT5G17190/AT1G56330/AT1G48440/AT1G02130/AT3G03160/AT2G36300/AT3G17780/AT3G59500/AT4G14455/AT5G42570/AT3G11730/AT3G52760/AT1G80500/AT5G02280/AT3G52190/AT2G20930/AT1G30890/AT5G48660/AT3G24350/AT1G11890/AT5G58060/AT4G30260/AT1G11905/AT2G18840/AT4G17170/AT5G01430/AT3G07190/AT1G05785/AT3G03180/AT2G45200	30
GO:0010207	photosystem II assembly	15/6182	24/19652	0.00168115	0.0222936	0.0189197	AT5G66570/AT4G10340/AT1G54500/AT2G20890/AT1G03600/AT1G71500/AT3G50820/AT5G02120/AT1G34000/AT1G55480/AT1G05385/AT4G35250/ATCG00680/AT3G60370/AT4G19100	15
GO:0009073	aromatic amino acid family biosynthetic process	22/6182	40/19652	0.00169709	0.0222936	0.0189197	AT1G75500/AT1G22410/AT1G15710/AT3G44720/AT2G45300/AT3G54640/AT2G27820/AT5G54810/AT1G48860/AT4G33510/AT5G22630/AT2G04400/AT1G48850/AT5G05590/AT4G27070/AT5G66120/AT4G39980/AT5G34930/AT3G29200/AT1G25220/AT4G02610/AT5G10870	22
GO:0009733	response to auxin	111/6182	279/19652	0.00185826	0.0240464	0.0204072	AT5G13930/AT1G75950/AT5G09810/AT3G55120/AT5G40770/AT5G08640/AT5G42190/AT4G38840/AT5G18030/AT1G64520/AT2G22240/AT4G34760/AT3G01130/AT5G20570/AT2G22670/AT5G07990/AT2G06850/AT1G04250/AT1G22920/AT4G38860/AT4G38630/AT5G54500/AT1G10230/AT1G29510/AT1G77690/AT2G33860/AT5G37770/AT1G72430/AT5G65670/AT4G32460/AT1G29500/AT2G47460/AT1G19830/AT1G20140/AT4G13520/AT4G36800/AT1G54990/AT1G19840/AT4G29080/AT5G18020…	111
GO:0006694	steroid biosynthetic process	23/6182	43/19652	0.00219798	0.0273295	0.0231935	AT3G47350/AT1G20050/AT1G11680/AT1G20330/AT4G11820/AT4G12110/AT1G76090/AT1G50430/AT1G10030/AT3G02580/AT3G52940/AT2G33630/AT2G38700/AT2G34490/AT4G17190/AT5G47770/AT2G38050/AT3G54250/AT4G22755/AT4G22756/AT4G31910/AT5G27450/AT5G13710	23
GO:0006949	syncytium formation	8/6182	10/19652	0.00223805	0.0273295	0.0231935	AT4G28250/AT2G28950/AT2G03090/AT2G39700/AT1G69530/AT2G37640/AT2G40610/AT1G26770	8
GO:0008295	spermidine biosynthetic process	8/6182	10/19652	0.00223805	0.0273295	0.0231935	AT4G34710/AT3G02470/AT5G53120/AT1G23820/AT2G16500/AT5G15950/AT5G18930/AT1G70310	8
GO:0110102	ribulose bisphosphate carboxylase complex assembly	8/6182	10/19652	0.00223805	0.0273295	0.0231935	AT1G67090/AT5G38410/AT3G47650/AT5G51110/AT3G56910/AT5G28500/AT5G19855/AT3G04550	8
GO:0034599	cellular response to oxidative stress	20/6182	36/19652	0.00232142	0.0279537	0.0237232	AT3G52960/AT2G28190/AT3G26060/AT1G07890/AT1G65980/AT1G08830/AT3G06050/AT5G40370/AT4G25130/AT4G08390/AT4G35000/AT2G41090/AT2G20270/AT4G04800/AT5G07460/AT5G57345/AT4G09010/AT1G66330/AT1G65970/AT4G35970	20
GO:0072593	reactive oxygen species metabolic process	11/6182	16/19652	0.00239935	0.0283049	0.0240212	AT3G49120/AT3G49110/AT4G04950/AT4G34460/AT5G51720/AT5G62530/AT5G53540/AT1G66330/AT2G30950/AT1G79440/AT5G62520	11
GO:0006526	arginine biosynthetic process	9/6182	12/19652	0.00244967	0.0283049	0.0240212	AT1G80600/AT3G57560/AT4G24830/AT3G27740/AT5G10920/AT1G75330/AT4G17830/AT2G19940/AT1G29900	9
GO:0033014	tetrapyrrole biosynthetic process	9/6182	12/19652	0.00244967	0.0283049	0.0240212	AT3G48730/AT5G63570/AT1G69740/AT5G26030/AT1G58290/AT5G08280/AT3G21200/AT3G14110/AT2G30390	9
GO:0006626	protein targeting to mitochondrion	10/6182	14/19652	0.00248116	0.0283049	0.0240212	AT1G27390/AT1G04070/AT3G27080/AT3G20000/AT5G43970/AT1G17530/AT5G40930/AT1G13900/AT2G19080/AT5G23395	10
GO:0007010	cytoskeleton organization	22/6182	41/19652	0.00258368	0.0290916	0.0246889	AT5G44340/AT5G09810/AT5G62700/AT4G14960/AT3G18780/AT2G29550/AT5G12250/AT5G19770/AT5G62690/AT1G04820/AT5G19780/AT3G53750/AT1G20010/AT4G20890/AT3G12110/AT3G60830/AT4G34490/AT2G37620/AT1G50010/AT5G23860/AT1G75780/AT1G64740	22
GO:0006520	amino acid metabolic process	19/6182	34/19652	0.00271328	0.0297774	0.025271	AT4G38220/AT5G01410/AT4G29840/AT4G31990/AT5G11520/AT2G30970/AT1G75330/AT3G10050/AT2G20340/AT3G20330/AT1G72810/AT5G53970/AT5G18170/AT5G19550/AT4G23600/AT5G07440/AT5G21060/AT2G20610/AT1G35580	19
GO:0019752	carboxylic acid metabolic process	19/6182	34/19652	0.00271328	0.0297774	0.025271	AT1G04410/AT1G53240/AT5G58330/AT4G35260/AT3G15020/AT4G17260/AT1G65960/AT2G22780/AT2G02010/AT5G09660/AT1G65930/AT1G43710/AT5G03290/AT3G09810/AT2G17130/AT2G20340/AT5G43330/AT3G17760/AT5G56720	19
GO:0009699	phenylpropanoid biosynthetic process	23/6182	44/19652	0.00324796	0.0351997	0.0298726	AT4G39330/AT1G07890/AT1G55210/AT3G53260/AT2G40890/AT3G13650/AT4G36220/AT3G13662/AT4G34050/AT3G19450/AT1G15950/AT1G65870/AT1G58170/AT4G37980/AT1G22900/AT4G23690/AT1G80820/AT4G34230/AT1G72680/AT3G13660/AT4G11190/AT2G39430/AT3G13610	23
GO:0009082	branched-chain amino acid biosynthetic process	14/6182	23/19652	0.00341215	0.0365226	0.0309953	AT2G43090/AT3G58610/AT3G48560/AT3G20390/AT1G10060/AT1G50110/AT4G13430/AT1G31180/AT3G10050/AT1G80560/AT5G21060/AT3G49680/AT5G16290/AT5G65780	14
GO:0048868	pollen tube development	20/6182	37/19652	0.00357205	0.0377679	0.0320521	AT2G47470/AT2G34590/AT4G31590/AT3G59760/AT3G10560/AT2G24630/AT5G03080/AT3G05000/AT5G62270/AT4G05450/AT1G25450/AT2G47510/AT3G28180/AT3G06430/AT1G16340/AT1G79500/AT3G01640/AT4G01220/AT2G35300/AT3G07330	20
GO:0010025	wax biosynthetic process	13/6182	21/19652	0.00387576	0.0400685	0.0340046	AT4G24510/AT1G57750/AT1G68530/AT3G55360/AT5G57800/AT1G10670/AT1G01120/AT4G22330/AT5G02890/AT4G33790/AT1G51500/AT1G06360/AT1G02205	13
GO:0009734	auxin-activated signaling pathway	95/6182	239/19652	0.00388206	0.0400685	0.0340046	AT1G75950/AT1G75500/AT2G21050/AT5G42190/AT5G18030/AT4G34760/AT5G63310/AT5G20570/AT2G22670/AT1G04250/AT3G51060/AT1G10230/AT1G29510/AT1G77690/AT2G33860/AT5G65670/AT1G25490/AT4G32460/AT5G47750/AT1G29500/AT2G47170/AT5G46700/AT1G20140/AT4G13520/AT4G28050/AT4G29080/AT3G53020/AT5G18020/AT5G54510/AT1G71090/AT5G57420/AT3G45600/AT5G18060/AT2G42580/AT1G29430/AT3G47810/AT1G69160/AT3G23050/AT1G29440/AT5G18080…	95
GO:0008643	carbohydrate transport	56/6182	131/19652	0.00414287	0.0422573	0.0358622	AT5G50790/AT2G25520/AT1G76670/AT4G32390/AT5G11230/AT3G18830/AT1G77610/AT4G23010/AT5G46110/AT3G47420/AT1G21460/AT2G48020/AT4G31600/AT3G14770/AT3G01550/AT5G17630/AT5G65000/AT1G21070/AT5G19980/AT5G04160/AT5G54800/AT5G17010/AT4G02050/AT3G05400/AT5G33320/AT1G19450/AT3G28007/AT1G20840/AT5G42420/AT1G76340/AT2G20780/AT3G19930/AT3G11320/AT4G21480/AT5G59250/AT1G71880/AT1G61800/AT1G34020/AT4G04750/AT5G41760…	56
GO:0009873	ethylene-activated signaling pathway	74/6182	181/19652	0.00447111	0.0450751	0.0382535	AT1G05850/AT1G75950/AT5G38480/AT1G01250/AT5G42190/AT2G25490/AT2G44940/AT3G15730/AT3G46060/AT1G72430/AT1G25490/AT1G15360/AT2G46310/AT1G77200/AT1G53910/AT4G11140/AT3G15210/AT1G53170/AT2G23340/AT3G61630/AT3G25890/AT1G68550/AT3G16280/AT5G67190/AT5G44210/AT1G12890/AT5G11590/AT3G16770/AT4G36900/AT1G71130/AT5G25390/AT3G52430/AT2G22370/AT4G32800/AT4G27950/AT4G17500/AT1G25560/AT1G44830/AT5G25350/AT2G40750…	74
GO:1902600	proton transmembrane transport	59/6182	140/19652	0.00483388	0.0481722	0.0408819	AT5G08690/AT3G58730/AT5G13430/AT4G09650/AT4G34720/AT5G13440/AT5G47030/AT2G16510/AT3G42050/AT4G38920/AT2G33040/AT3G18830/AT5G13450/AT1G15690/AT1G51650/AT3G54110/AT1G78900/AT4G29480/AT1G12840/AT4G02620/AT1G75630/AT4G00895/AT1G19910/AT3G52300/AT2G22500/AT2G25610/AT4G04640/AT2G19680/AT5G08670/AT2G21870/AT4G11150/AT4G26710/AT3G28710/AT5G55290/AT4G26210/AT3G28715/AT1G20260/AT4G23710/AT3G01390/AT2G20780…	59

## Sheet: phyb nAT UP
ID	Description	GeneRatio	BgRatio	pvalue	p.adjust	qvalue	geneID	Count
GO:0016310	phosphorylation	688/6513	1279/19652	8.77323e-56	7.72044e-53	5.91962e-53	AT5G35170/AT3G63340/AT4G30310/AT2G37840/AT5G64070/AT4G33080/AT4G03230/AT1G53440/AT4G24740/AT4G32660/AT4G12020/AT1G26150/AT1G73660/AT1G53510/AT1G66980/AT5G14720/AT1G65950/AT1G18160/AT5G04510/AT4G24450/AT1G29750/AT5G63930/AT3G56960/AT4G08470/AT1G48430/AT5G58350/AT3G13690/AT5G51290/AT4G02260/AT4G04740/AT3G59410/AT4G21410/AT3G04810/AT1G18270/AT1G60490/AT1G13350/AT1G53430/AT1G49730/AT1G49180/AT1G61500…	688
GO:0006468	protein phosphorylation	545/6513	998/19652	1.55174e-46	6.82764e-44	5.23507e-44	AT3G63340/AT2G42330/AT2G37840/AT4G33080/AT4G03230/AT1G53440/AT4G24740/AT4G32660/AT4G12020/AT1G26150/AT1G73660/AT1G53510/AT1G66980/AT5G14720/AT1G65950/AT1G18160/AT5G04510/AT1G29750/AT5G63930/AT4G08470/AT5G58350/AT3G13690/AT4G04740/AT3G59410/AT4G21410/AT3G04810/AT1G13350/AT1G53430/AT1G49730/AT1G49180/AT1G61500/AT1G22870/AT2G20850/AT4G29990/AT1G11280/AT5G41260/AT5G11400/AT3G06630/AT3G06620/AT4G38230…	545
GO:0006338	chromatin remodeling	108/6513	141/19652	3.39536e-26	9.95973e-24	7.63658e-24	AT5G42400/AT3G57300/AT3G48710/AT5G43990/AT1G50410/AT1G63490/AT3G18520/AT1G76710/AT4G27910/AT2G23740/AT4G00990/AT1G55970/AT2G23380/AT2G40770/AT2G25170/AT2G36740/AT4G21430/AT2G18760/AT1G79350/AT3G07740/AT3G12980/AT1G56460/AT3G20010/AT3G12810/AT5G22750/AT5G19310/AT2G31650/AT3G61740/AT1G79000/AT4G16845/AT2G13370/AT1G16710/AT3G33520/AT5G18190/AT1G26330/AT5G51230/AT4G26630/AT5G53430/AT5G55300/AT4G02020…	108
GO:0007018	microtubule-based movement	59/6513	63/19652	5.25554e-24	1.15622e-21	8.86526e-22	AT4G38950/AT5G27950/AT3G50240/AT2G37420/AT3G45850/AT3G51150/AT5G06670/AT4G39050/AT3G20150/AT5G66310/AT1G72250/AT3G10310/AT3G44050/AT1G12430/AT1G01950/AT3G12020/AT2G28620/AT1G20060/AT5G65460/AT1G21730/AT5G47820/AT3G17360/AT5G65930/AT2G21380/AT5G60930/AT2G22610/AT3G19050/AT2G47500/AT3G43210/AT5G27550/AT4G27180/AT4G21270/AT2G36200/AT5G54670/AT3G63480/AT1G18370/AT5G23910/AT3G23670/AT3G10180/AT3G16630…	59
GO:0006974	cellular response to DNA damage stimulus	139/6513	218/19652	1.50546e-20	2.6496e-18	2.03157e-18	AT5G44750/AT3G57300/AT1G66730/AT1G79950/AT3G61420/AT5G41370/AT3G28030/AT2G31970/AT4G02460/AT5G01630/AT2G32700/AT1G52500/AT1G67500/AT3G48190/AT1G80810/AT1G48360/AT5G01780/AT2G18760/AT4G36280/AT5G24280/AT5G07660/AT5G61460/AT1G19100/AT1G07745/AT5G22750/AT2G27170/AT5G16630/AT3G32920/AT3G20540/AT5G41150/AT1G55750/AT1G80420/AT5G22010/AT4G02070/AT1G08840/AT5G15920/AT3G54670/AT3G48900/AT4G00020/AT5G57160…	139
GO:0006281	DNA repair	156/6513	257/19652	8.45027e-20	1.23937e-17	9.50285e-18	AT5G44750/AT3G57300/AT1G66730/AT1G79950/AT3G61420/AT3G10010/AT5G41370/AT3G28030/AT2G31970/AT4G02460/AT5G01630/AT1G76710/AT1G52500/AT1G67500/AT3G48190/AT1G80810/AT1G48360/AT5G01780/AT2G18760/AT4G36280/AT5G24280/AT5G07660/AT5G63920/AT5G61460/AT1G19100/AT1G31360/AT1G07745/AT5G22750/AT2G36490/AT2G27170/AT5G16630/AT3G32920/AT3G20540/AT5G41150/AT5G46210/AT1G55750/AT1G80420/AT5G22010/AT4G02070/AT1G08840…	156
GO:0006325	chromatin organization	120/6513	194/19652	1.92496e-16	2.41995e-14	1.85549e-14	AT3G48710/AT5G43990/AT1G05830/AT1G50410/AT3G18520/AT1G76710/AT1G21610/AT4G27910/AT2G23740/AT1G55250/AT2G23380/AT2G25170/AT4G36280/AT1G19100/AT3G12980/AT3G20010/AT3G12810/AT5G22750/AT5G19310/AT2G31650/AT3G61740/AT5G11470/AT1G79000/AT2G43650/AT4G32820/AT2G13370/AT3G24010/AT2G44950/AT1G16710/AT3G33520/AT1G03770/AT4G19020/AT5G51230/AT4G15180/AT4G26630/AT5G53430/AT2G46020/AT4G02020/AT5G55390/AT1G30810…	120
GO:0007049	cell cycle	159/6513	282/19652	6.19563e-16	6.81519e-14	5.22552e-14	AT4G33260/AT5G13840/AT4G33270/AT2G31970/AT4G26760/AT1G03780/AT5G01630/AT5G48600/AT1G80810/AT5G62410/AT2G39090/AT3G47460/AT5G15540/AT4G32700/AT2G27170/AT5G45190/AT3G43210/AT2G20000/AT1G61030/AT2G32900/AT3G54670/AT3G07980/AT4G21270/AT4G28080/AT4G00020/AT5G51600/AT5G47690/AT4G31880/AT1G18370/AT1G34460/AT2G14120/AT1G77600/AT5G27620/AT3G02680/AT1G27630/AT5G49880/AT1G11060/AT2G34680/AT3G16320/AT1G72150…	159
GO:0031047	RNA-mediated gene silencing	64/6513	84/19652	6.9865e-16	6.83124e-14	5.23783e-14	AT3G03300/AT5G43990/AT1G01040/AT1G50410/AT2G27880/AT5G20320/AT4G36280/AT2G19910/AT1G19100/AT5G23570/AT3G20010/AT5G21150/AT4G00380/AT3G20550/AT3G12550/AT3G43920/AT1G48410/AT1G13790/AT2G19930/AT5G43810/AT1G17760/AT2G27040/AT3G48670/AT5G23080/AT1G15910/AT4G24970/AT5G59390/AT1G54440/AT2G13540/AT1G80790/AT3G15390/AT1G04050/AT4G36290/AT5G09860/AT3G49500/AT2G19920/AT5G13010/AT3G42670/AT2G27100/AT1G15215…	64
GO:0006397	mRNA processing	177/6513	333/19652	2.79079e-14	2.45589e-12	1.88305e-12	AT5G09880/AT2G42330/AT3G19670/AT3G54230/AT3G04160/AT4G24740/AT4G36690/AT2G02570/AT1G15200/AT5G08230/AT5G37370/AT3G50670/AT1G09140/AT5G64390/AT4G29750/AT1G60200/AT1G55310/AT2G25850/AT3G19840/AT2G42270/AT5G61140/AT2G35340/AT5G16180/AT3G62310/AT5G63370/AT1G60900/AT5G46400/AT3G63070/AT5G10800/AT4G22350/AT5G58040/AT3G01370/AT5G12280/AT1G32490/AT1G07350/AT1G14640/AT3G52120/AT1G03910/AT1G15280/AT1G44910…	177
GO:0051301	cell division	155/6513	287/19652	1.98993e-13	1.59194e-11	1.22062e-11	AT4G33260/AT5G13840/AT4G33270/AT4G26760/AT1G03780/AT5G48600/AT1G80810/AT2G25170/AT5G62410/AT2G39090/AT3G47460/AT5G15540/AT4G32700/AT1G78580/AT2G27170/AT5G45190/AT1G17580/AT3G43210/AT2G20000/AT3G20550/AT4G37750/AT1G61030/AT2G32900/AT2G44950/AT3G33520/AT3G54670/AT3G07980/AT4G21270/AT5G51600/AT5G47690/AT4G31880/AT1G18370/AT1G34460/AT2G14120/AT1G77600/AT5G27620/AT1G27630/AT5G49880/AT2G26890/AT1G11060…	155
GO:0051321	meiotic cell cycle	59/6513	82/19652	6.97102e-13	5.11208e-11	3.91967e-11	AT2G31970/AT5G23610/AT5G01630/AT5G48600/AT5G62410/AT5G63370/AT5G63920/AT5G19400/AT3G47460/AT5G15540/AT3G43610/AT2G27170/AT5G22010/AT1G61030/AT3G54670/AT4G21270/AT2G46980/AT4G00020/AT1G34355/AT1G11060/AT2G42890/AT1G08620/AT1G22275/AT5G54260/AT1G20570/AT4G22970/AT4G30870/AT3G20475/AT5G40820/AT1G22260/AT3G27730/AT2G21800/AT5G61960/AT3G09660/AT5G57880/AT2G14050/AT1G35530/AT5G02520/AT2G22140/AT5G07290…	59
GO:0016579	protein deubiquitination	38/6513	50/19652	6.43174e-10	4.3538e-08	3.33826e-08	AT4G22350/AT2G40930/AT5G65450/AT3G11910/AT3G47890/AT5G06600/AT1G52450/AT1G17110/AT5G61940/AT1G48790/AT5G61950/AT3G47910/AT5G57990/AT3G49600/AT3G14400/AT1G10600/AT1G04860/AT3G20630/AT5G22030/AT4G24560/AT4G22285/AT1G65120/AT2G22310/AT4G31670/AT2G32780/AT4G10570/AT1G65110/AT5G46740/AT1G52430/AT2G24640/AT4G10590/AT5G51530/AT4G17895/AT4G39370/AT2G27630/AT4G39910/AT1G65200/AT1G65130	38
GO:0032508	DNA duplex unwinding	32/6513	40/19652	1.50163e-09	9.43881e-08	7.23718e-08	AT1G79950/AT5G41370/AT5G08110/AT4G35740/AT1G31360/AT1G20720/AT1G08840/AT4G25120/AT1G48050/AT5G66750/AT1G06670/AT2G07690/AT5G27680/AT1G16970/AT3G23700/AT5G44635/AT1G03190/AT3G27730/AT5G46280/AT3G09660/AT2G14050/AT1G35530/AT2G01440/AT1G79890/AT5G41360/AT1G10930/AT1G44900/AT4G14790/AT1G30660/AT2G16440/AT2G21660/AT2G44980	32
GO:0006310	DNA recombination	55/6513	85/19652	2.47423e-09	1.45155e-07	1.11297e-07	AT1G66730/AT1G79950/AT4G02460/AT5G01630/AT1G80810/AT5G07660/AT5G61460/AT4G35740/AT1G31360/AT1G07745/AT5G22750/AT3G32920/AT5G41150/AT5G22010/AT5G15920/AT4G25120/AT4G00020/AT5G57160/AT5G47690/AT4G31880/AT1G48050/AT1G77600/AT5G63950/AT3G05210/AT1G15940/AT1G80210/AT5G27680/AT1G65470/AT4G21070/AT1G16970/AT4G30870/AT1G08130/AT2G21800/AT5G57880/AT1G35530/AT3G23100/AT1G27880/AT2G22140/AT2G01440/AT3G05740…	55
GO:0006364	rRNA processing	83/6513	149/19652	1.13068e-08	6.21874e-07	4.7682e-07	AT1G01040/AT5G08420/AT2G48100/AT3G01540/AT5G66540/AT1G17690/AT5G02250/AT5G26180/AT2G43650/AT4G02400/AT1G10490/AT1G76050/AT5G42540/AT2G40360/AT5G08600/AT5G38720/AT2G40430/AT3G11964/AT1G66260/AT4G14510/AT5G63420/AT1G63980/AT5G59980/AT5G46420/AT5G48240/AT3G06530/AT4G26600/AT5G18570/AT3G01160/AT5G38747/AT3G06480/AT2G17510/AT5G40530/AT3G57940/AT1G01860/AT1G59760/AT1G06560/AT1G31970/AT5G55920/AT2G47300…	83
GO:0030048	actin filament-based movement	18/6513	19/19652	2.98793e-08	1.54669e-06	1.18592e-06	AT4G27370/AT4G28710/AT5G54280/AT3G58160/AT2G20290/AT4G33200/AT2G33240/AT1G17580/AT1G04160/AT5G43900/AT5G20490/AT1G50360/AT1G08730/AT1G04600/AT1G42550/AT1G54560/AT2G31900/AT5G20610	18
GO:0046777	protein autophosphorylation	65/6513	111/19652	3.24436e-08	1.58613e-06	1.21616e-06	AT4G24740/AT4G32660/AT5G04510/AT5G58350/AT3G13690/AT3G20200/AT2G31800/AT3G45780/AT1G11350/AT1G08720/AT3G17850/AT5G03730/AT2G01450/AT1G69220/AT3G07980/AT1G56720/AT5G58140/AT4G16970/AT5G50860/AT3G45240/AT3G59110/AT3G13530/AT1G67840/AT5G60280/AT2G43850/AT5G35980/AT5G49760/AT1G61380/AT5G65530/AT4G14340/AT2G17520/AT1G08680/AT5G66850/AT1G06390/AT1G71830/AT5G16000/AT1G70520/AT4G03260/AT1G18890/AT2G46700…	65
GO:0008380	RNA splicing	106/6513	206/19652	3.85991e-08	1.78775e-06	1.37075e-06	AT2G42330/AT3G19670/AT3G54230/AT3G04160/AT4G36690/AT3G63400/AT1G15200/AT5G37370/AT3G50670/AT1G09140/AT4G29750/AT1G60200/AT1G55310/AT2G39340/AT3G19840/AT5G04810/AT2G42270/AT5G61140/AT2G35340/AT5G16180/AT3G62310/AT5G63370/AT3G25840/AT1G60900/AT5G46400/AT5G10800/AT3G01370/AT5G12280/AT1G32490/AT1G07350/AT1G14640/AT3G52120/AT1G03910/AT1G15280/AT1G44910/AT2G29210/AT1G65660/AT1G04080/AT2G43370/AT3G61860…	106
GO:0034220	monoatomic ion transmembrane transport	65/6513	115/19652	2.05207e-07	9.0291e-06	6.92303e-06	AT2G23790/AT4G02900/AT2G23980/AT2G46450/AT5G26240/AT1G30270/AT3G01100/AT5G10490/AT3G17700/AT1G58200/AT1G05200/AT3G51480/AT2G48060/AT4G18290/AT1G73020/AT1G25480/AT3G54510/AT1G58520/AT1G69450/AT3G14810/AT4G22200/AT4G35440/AT4G15430/AT3G07520/AT1G11960/AT5G33280/AT5G37500/AT3G17690/AT5G57940/AT5G49890/AT4G35290/AT1G32090/AT1G55620/AT5G53130/AT2G32390/AT1G42540/AT2G45870/AT5G27100/AT2G17260/AT4G03560…	65
GO:0071897	DNA biosynthetic process	22/6513	27/19652	3.31925e-07	1.39093e-05	1.06649e-05	AT5G44750/AT1G66730/AT4G24790/AT5G63960/AT4G32700/AT3G20540/AT5G57160/AT4G18820/AT1G14460/AT1G78650/AT5G44740/AT1G08260/AT2G27120/AT2G02480/AT5G67100/AT1G50840/AT3G49500/AT1G10520/AT1G08130/AT5G45720/AT1G49250/AT3G52050	22
GO:0042908	xenobiotic transport	20/6513	24/19652	5.88028e-07	2.35211e-05	1.80347e-05	AT3G60970/AT1G30420/AT1G30410/AT3G21250/AT2G38330/AT3G13080/AT3G62700/AT3G60160/AT1G30400/AT4G38380/AT3G13100/AT2G34660/AT1G04120/AT1G66950/AT2G47800/AT3G59140/AT3G08040/AT3G13090/AT2G47000/AT4G39030	20
GO:0051276	chromosome organization	15/6513	16/19652	6.97842e-07	2.67e-05	2.04722e-05	AT1G79950/AT5G48600/AT5G62410/AT5G07660/AT5G61460/AT3G47460/AT2G27170/AT5G15920/AT3G54670/AT5G24630/AT5G58270/AT1G79890/AT1G10930/AT2G31270/AT5G05490	15
GO:0080188	gene silencing by RNA-directed DNA methylation	26/6513	35/19652	7.43282e-07	2.72537e-05	2.08967e-05	AT5G43990/AT1G50410/AT1G19100/AT3G20010/AT4G00380/AT3G12550/AT1G05490/AT1G13790/AT2G27040/AT3G48670/AT1G15910/AT5G59390/AT1G54440/AT1G80790/AT3G07610/AT3G14980/AT3G42670/AT5G20420/AT2G21450/AT3G54760/AT5G35910/AT5G04290/AT4G03430/AT3G24340/AT2G16390/AT3G29375	26
GO:0009908	flower development	107/6513	220/19652	1.24232e-06	4.37295e-05	3.35295e-05	AT5G65050/AT1G30970/AT4G16280/AT1G01040/AT5G08230/AT5G64390/AT3G23980/AT3G54720/AT5G06100/AT2G32700/AT1G76710/AT3G57230/AT4G03110/AT2G23380/AT2G36740/AT5G44180/AT3G63070/AT3G12810/AT5G45190/AT4G31610/AT5G46210/AT1G72560/AT4G37750/AT4G25520/AT5G61150/AT5G51230/AT3G58780/AT5G64960/AT3G06400/AT2G47700/AT5G62090/AT5G08450/AT1G25540/AT3G54610/AT5G13480/AT5G16780/AT5G23150/AT5G60410/AT4G02560/AT5G27220…	107
GO:0006075	(1->3)-beta-D-glucan biosynthetic process	12/6513	12/19652	1.744e-06	5.48115e-05	4.20265e-05	AT3G14570/AT3G59100/AT4G04970/AT1G05570/AT2G36850/AT1G06490/AT5G13000/AT3G07160/AT2G31960/AT2G13680/AT4G03550/AT5G36870	12
GO:0006282	regulation of DNA repair	12/6513	12/19652	1.744e-06	5.48115e-05	4.20265e-05	AT4G36280/AT1G19100/AT4G24970/AT4G36290/AT3G13226/AT5G40820/AT5G66130/AT4G29860/AT2G31870/AT2G31865/AT3G05480/AT5G13130	12
GO:0034204	lipid translocation	12/6513	12/19652	1.744e-06	5.48115e-05	4.20265e-05	AT1G59820/AT1G26130/AT3G27870/AT1G68710/AT5G44240/AT1G72700/AT1G17500/AT1G13210/AT1G54280/AT3G25610/AT5G04930/AT3G13900	12
GO:0001510	RNA methylation	21/6513	27/19652	2.53661e-06	7.69731e-05	5.90189e-05	AT5G26180/AT4G20920/AT2G28450/AT1G45231/AT4G26600/AT4G40000/AT1G06560/AT5G51130/AT5G55920/AT3G13180/AT1G30545/AT2G22400/AT3G54170/AT4G10760/AT4G25730/AT3G21300/AT4G20910/AT5G13830/AT5G66180/AT4G38020/AT3G27180	21
GO:0045814	negative regulation of gene expression, epigenetic	25/6513	35/19652	4.02709e-06	0.000118128	9.05741e-05	AT1G63490/AT3G18520/AT3G02890/AT1G21610/AT2G23740/AT4G11560/AT5G16680/AT2G23380/AT5G01270/AT1G03770/AT4G02020/AT2G27350/AT5G11530/AT1G08620/AT5G44280/AT5G46910/AT4G20400/AT3G20810/AT5G17690/AT5G10010/AT1G08060/AT3G10490/AT5G57380/AT1G09320/AT3G44600	25
GO:0008360	regulation of cell shape	19/6513	24/19652	4.90996e-06	0.000137151	0.00010516	AT3G14570/AT3G08840/AT2G47410/AT3G59100/AT4G04970/AT1G05570/AT1G77460/AT2G36850/AT1G06490/AT5G13000/AT3G07160/AT2G22125/AT2G31960/AT2G13680/AT4G03550/AT4G16340/AT1G63680/AT5G36870/AT5G23260	19
GO:0006357	regulation of transcription by RNA polymerase II	78/6513	154/19652	4.98729e-06	0.000137151	0.00010516	AT5G09410/AT2G47410/AT4G32730/AT3G07740/AT5G44180/AT5G12230/AT1G05230/AT5G45190/AT5G01270/AT2G31650/AT1G79000/AT2G33540/AT1G79700/AT5G19480/AT5G05660/AT1G17920/AT1G77800/AT5G13020/AT3G58780/AT5G27620/AT1G27630/AT4G21670/AT5G64960/AT1G79020/AT1G76510/AT3G07610/AT5G26760/AT4G00450/AT4G08350/AT4G16420/AT2G34640/AT2G17410/AT1G28420/AT4G32620/AT5G20170/AT1G55325/AT1G79840/AT5G46880/AT5G15800/AT2G36010…	78
GO:0009553	embryo sac development	43/6513	73/19652	5.39851e-06	0.00014396	0.000110381	AT1G17690/AT5G55820/AT3G03110/AT4G00020/AT1G17760/AT3G06400/AT3G11964/AT1G14350/AT1G67120/AT4G15570/AT1G01690/AT5G60410/AT2G43410/AT5G59980/AT1G61140/AT1G72440/AT5G07180/AT2G02820/AT5G57880/AT2G41500/AT5G62230/AT5G05970/AT3G12280/AT3G23940/AT5G17020/AT2G34920/AT4G05410/AT5G44700/AT5G48030/AT1G15440/AT5G41190/AT5G55490/AT1G09100/AT1G15330/AT5G18000/AT1G63990/AT3G48360/AT2G47430/AT1G31660/AT5G35600…	43
GO:0080111	DNA demethylation	13/6513	14/19652	5.59807e-06	0.000144891	0.000111095	AT3G10010/AT2G36490/AT1G80420/AT5G04560/AT4G36050/AT1G05910/AT3G15120/AT1G08130/AT3G14890/AT5G58130/AT4G31270/AT1G72270/AT4G34060	13
GO:0009793	embryo development ending in seed dormancy	143/6513	318/19652	6.48256e-06	0.000162156	0.000124332	AT4G00060/AT4G04350/AT1G68990/AT5G22640/AT3G54720/AT2G32700/AT2G14680/AT5G48600/AT4G24900/AT2G35340/AT1G17690/AT5G15540/AT3G48110/AT1G78580/AT1G30610/AT4G25520/AT1G50030/AT1G21650/AT1G61030/AT2G35510/AT3G54010/AT5G04560/AT1G03910/AT5G16715/AT3G24560/AT3G27670/AT4G07410/AT4G00020/AT5G55300/AT1G32230/AT2G26890/AT2G34090/AT3G11450/AT1G11060/AT5G62090/AT3G12080/AT1G14610/AT1G67960/AT5G13480/AT5G13690…	143
GO:0060255	regulation of macromolecule metabolic process	16/6513	19/19652	6.63365e-06	0.000162156	0.000124332	AT5G26610/AT4G27910/AT3G07740/AT5G23570/AT4G00380/AT3G61740/AT3G12550/AT1G13790/AT5G53430/AT3G48670/AT1G15910/AT1G80790/AT4G16420/AT1G74250/AT5G09790/AT4G34430	16
GO:0035556	intracellular signal transduction	22/6513	30/19652	7.74972e-06	0.000184318	0.000141325	AT4G04740/AT5G04540/AT3G10550/AT4G38230/AT5G57565/AT4G13020/AT1G69220/AT1G45160/AT3G22190/AT4G21940/AT3G06110/AT5G58690/AT3G21630/AT4G04710/AT1G71860/AT3G47220/AT5G58670/AT2G46070/AT3G55940/AT2G40116/AT4G08550/AT1G10940	22
GO:0046488	phosphatidylinositol metabolic process	14/6513	16/19652	1.0961e-05	0.000253833	0.000194626	AT3G56960/AT3G09920/AT4G33240/AT2G41210/AT3G59770/AT3G07960/AT3G14270/AT1G10900/AT1G21980/AT1G60890/AT1G71010/AT1G77740/AT4G01190/AT1G34260	14
GO:0032259	methylation	146/6513	329/19652	1.23364e-05	0.00027836	0.000213431	AT5G42400/AT5G43990/AT1G05830/AT3G18000/AT1G76710/AT1G23360/AT4G27910/AT2G23740/AT2G23380/AT1G64600/AT2G32170/AT4G20130/AT5G64030/AT4G17610/AT5G26180/AT2G31650/AT3G61740/AT1G45248/AT4G19020/AT1G13790/AT4G15180/AT5G05570/AT4G20920/AT5G53430/AT4G02020/AT2G28450/AT2G34300/AT1G45231/AT4G08990/AT2G35160/AT3G55080/AT5G06620/AT3G61990/AT1G04050/AT1G19340/AT4G16570/AT3G07670/AT2G16370/AT4G26600/AT3G21820…	146
GO:0040029	epigenetic regulation of gene expression	32/6513	51/19652	1.39657e-05	0.000307244	0.000235578	AT1G05830/AT4G00990/AT4G21430/AT1G79350/AT2G31650/AT5G11470/AT5G63080/AT4G15180/AT2G46020/AT5G55390/AT5G66750/AT2G27350/AT1G54490/AT5G11530/AT2G35160/AT4G24680/AT5G04240/AT5G40340/AT3G07610/AT3G01460/AT3G18730/AT3G21820/AT3G20810/AT3G48430/AT5G27650/AT2G28290/AT5G03280/AT4G00830/AT3G09670/AT5G57380/AT3G06930/AT2G18880	32
GO:0006260	DNA replication	53/6513	98/19652	1.51404e-05	0.000321286	0.000246345	AT1G66730/AT1G79950/AT4G24790/AT1G67500/AT5G63960/AT1G31360/AT4G32700/AT3G20540/AT5G22010/AT1G08840/AT5G57160/AT5G55300/AT4G18820/AT1G14460/AT2G07690/AT1G78650/AT5G44740/AT1G08260/AT1G65470/AT2G27120/AT5G22110/AT2G02480/AT5G67100/AT1G19080/AT1G50840/AT1G10520/AT5G44635/AT1G79150/AT1G08130/AT5G52950/AT5G46280/AT5G44785/AT4G29910/AT5G45720/AT5G16690/AT3G28730/AT2G20980/AT1G10930/AT1G47720/AT1G44900…	53
GO:0009555	pollen development	109/6513	235/19652	1.53341e-05	0.000321286	0.000246345	AT1G79950/AT4G02460/AT3G18000/AT2G35060/AT1G42470/AT4G35420/AT4G00800/AT4G31610/AT3G43210/AT3G03110/AT5G05570/AT5G01450/AT4G04970/AT5G64560/AT3G63480/AT1G18370/AT3G10405/AT1G08600/AT1G34355/AT5G26850/AT4G33240/AT2G03060/AT2G38185/AT2G36850/AT1G01690/AT4G20060/AT1G65470/AT4G29380/AT3G07160/AT3G07610/AT5G58270/AT3G55610/AT1G72440/AT3G14270/AT5G18700/AT1G05960/AT2G01690/AT5G15470/AT1G18750/AT5G55810…	109
GO:0006298	mismatch repair	12/6513	13/19652	1.57447e-05	0.000322217	0.000247059	AT1G65070/AT4G02460/AT4G02070/AT5G54090/AT3G18524/AT4G35520/AT3G20475/AT3G24320/AT4G25540/AT4G09140/AT3G24495/AT4G17380	12
GO:0008033	tRNA processing	49/6513	89/19652	1.65768e-05	0.000331535	0.000254203	AT5G24670/AT1G76170/AT1G72560/AT1G78010/AT2G32320/AT1G10490/AT3G24560/AT1G34150/AT3G55160/AT5G47970/AT3G49640/AT1G68720/AT3G63510/AT5G60430/AT3G16260/AT2G31580/AT1G07910/AT2G13440/AT5G59980/AT2G27760/AT3G02370/AT4G38890/AT4G40000/AT3G56120/AT4G04670/AT3G57940/AT4G27340/AT2G45270/AT2G47300/AT4G01880/AT2G22400/AT1G01760/AT3G11220/AT5G13680/AT1G51310/AT1G49540/AT2G43190/AT5G14460/AT2G32230/AT3G03710…	49
GO:0045010	actin nucleation	15/6513	18/19652	1.69732e-05	0.000331921	0.000254499	AT2G38440/AT2G46225/AT5G18410/AT3G05470/AT4G15200/AT5G54650/AT3G25500/AT2G35110/AT4G14147/AT1G59910/AT5G67470/AT5G07780/AT1G24150/AT1G70140/AT2G43800	15
GO:0000911	cytokinesis by cell plate formation	27/6513	41/19652	1.81919e-05	0.000348018	0.000266842	AT1G01040/AT4G26760/AT2G28620/AT3G17360/AT3G19050/AT3G43210/AT5G51600/AT1G18370/AT1G50240/AT1G12360/AT2G35630/AT1G49040/AT5G10470/AT4G22970/AT5G13260/AT5G18700/AT5G54440/AT5G55230/AT2G41670/AT3G48860/AT1G53140/AT5G11040/AT3G01780/AT4G08630/AT2G35190/AT5G23700/AT1G13980	27
GO:0048544	recognition of pollen	26/6513	39/19652	1.87217e-05	0.000350533	0.00026877	AT4G03230/AT1G61500/AT1G11280/AT1G61430/AT1G11350/AT1G61490/AT1G61360/AT1G61370/AT4G11900/AT3G49500/AT1G61380/AT1G61400/AT1G11410/AT1G61420/AT1G11300/AT2G19130/AT1G11303/AT1G61460/AT1G61390/AT4G27300/AT1G11330/AT1G61550/AT1G61440/AT4G21390/AT1G11340/AT1G61610	26
GO:0042254	ribosome biogenesis	52/6513	97/19652	2.50855e-05	0.000459901	0.000352628	AT5G08420/AT3G01540/AT5G66540/AT1G17690/AT1G69070/AT5G37350/AT2G40360/AT2G48120/AT1G06720/AT2G40430/AT3G12080/AT3G11964/AT1G29940/AT3G21540/AT1G13160/AT1G63980/AT5G46420/AT1G10300/AT3G06530/AT1G79150/AT4G26600/AT5G18570/AT2G24990/AT3G57660/AT1G52980/AT3G06480/AT1G06560/AT1G31970/AT5G55920/AT1G42440/AT1G26530/AT2G17250/AT4G25730/AT3G19800/AT1G12650/AT4G31520/AT1G55150/AT2G25870/AT3G12860/AT1G03530…	52
GO:0046856	phosphatidylinositol dephosphorylation	17/6513	22/19652	2.81908e-05	0.000492644	0.000377733	AT3G63240/AT3G14205/AT2G43900/AT3G43220/AT1G05630/AT1G05470/AT2G32010/AT5G20840/AT1G17340/AT1G34120/AT1G65580/AT3G19420/AT1G71710/AT1G22620/AT2G31830/AT4G18010/AT5G04980	17
GO:0009637	response to blue light	30/6513	48/19652	2.88561e-05	0.000492644	0.000377733	AT1G26260/AT5G38150/AT1G05630/AT3G45780/AT4G31390/AT5G27620/AT4G28880/AT5G58140/AT2G21150/AT2G34640/AT1G66840/AT1G42550/AT5G35840/AT1G53090/AT2G02710/AT4G01120/AT5G42900/AT5G43470/AT5G20610/AT1G68050/AT5G02200/AT3G28860/AT2G46340/AT3G01490/AT4G33980/AT5G48560/AT5G43630/AT4G28860/AT1G22770/AT2G36910	30
GO:0010072	primary shoot apical meristem specification	13/6513	15/19652	2.91108e-05	0.000492644	0.000377733	AT1G30490/AT2G34710/AT5G43810/AT4G32880/AT1G36160/AT1G15750/AT5G13570/AT5G27030/AT3G15880/AT1G80490/AT3G16830/AT3G13300/AT3G15170	13
GO:0015914	phospholipid transport	13/6513	15/19652	2.91108e-05	0.000492644	0.000377733	AT1G59820/AT1G26130/AT3G27870/AT1G68710/AT5G44240/AT1G72700/AT1G17500/AT1G13210/AT1G54280/AT3G12740/AT3G25610/AT5G04930/AT3G13900	13
GO:0007165	signal transduction	138/6513	313/19652	3.10209e-05	0.000515064	0.000394923	AT5G40910/AT4G12020/AT5G44510/AT5G19390/AT4G19510/AT5G46510/AT5G17890/AT3G06630/AT4G16900/AT4G16990/AT5G46470/AT3G44670/AT1G30270/AT1G03930/AT4G18130/AT1G31540/AT1G78540/AT2G17820/AT5G44870/AT5G51630/AT5G18370/AT5G55390/AT2G26980/AT5G17880/AT3G44630/AT5G22690/AT1G17040/AT2G01830/AT1G72840/AT4G19500/AT5G36930/AT4G16940/AT3G46920/AT5G45050/AT5G41550/AT5G45250/AT4G24580/AT5G11250/AT5G35410/AT5G45060…	138
GO:0000724	double-strand break repair via homologous recombination	28/6513	44/19652	3.29326e-05	0.000536679	0.000411497	AT5G01630/AT1G67500/AT5G24280/AT5G07660/AT5G61460/AT5G22750/AT5G16630/AT5G41150/AT5G15920/AT4G00020/AT3G02680/AT3G05210/AT1G65470/AT4G21070/AT4G30870/AT3G18730/AT3G09660/AT3G19210/AT1G35530/AT3G13782/AT5G64630/AT1G10930/AT1G14750/AT5G64520/AT2G28560/AT5G63540/AT3G13170/AT2G19480	28
GO:0006289	nucleotide-excision repair	19/6513	26/19652	3.59533e-05	0.000575253	0.000441073	AT3G61420/AT5G41370/AT3G28030/AT5G08110/AT1G20720/AT5G16630/AT5G41150/AT1G55750/AT4G15475/AT4G17020/AT1G10520/AT1G05120/AT1G03190/AT2G06040/AT5G41360/AT3G02540/AT5G21900/AT1G18340/AT1G16190	19
GO:0030422	siRNA processing	14/6513	17/19652	4.30038e-05	0.000675773	0.000518147	AT1G01040/AT5G23570/AT3G43920/AT4G20920/AT2G27040/AT5G23080/AT3G49500/AT1G63020/AT2G32940/AT5G04290/AT2G40030/AT1G56310/AT1G14790/AT4G11130	14
GO:0048481	plant ovule development	28/6513	45/19652	5.96522e-05	0.000920946	0.000706132	AT1G68990/AT1G25350/AT5G21150/AT4G25520/AT3G58780/AT5G62090/AT5G49030/AT5G60410/AT3G55400/AT1G32240/AT1G43850/AT5G07180/AT4G21530/AT5G15800/AT1G11130/AT5G62230/AT4G29860/AT5G16560/AT5G62000/AT2G41670/AT2G25840/AT3G13490/AT4G36920/AT1G11870/AT4G17300/AT3G45640/AT5G64050/AT5G23260	28
GO:0006418	tRNA aminoacylation for protein translation	27/6513	43/19652	6.41418e-05	0.000973186	0.000746187	AT4G04350/AT4G33760/AT1G25350/AT1G28350/AT3G56300/AT5G16715/AT1G14610/AT5G49030/AT1G17960/AT5G26830/AT3G55400/AT4G10320/AT4G13780/AT2G31170/AT2G33840/AT3G07420/AT2G25840/AT2G04842/AT3G13490/AT3G11710/AT1G11870/AT4G17300/AT4G26300/AT5G64050/AT1G66530/AT1G29880/AT3G23145	27
GO:0009791	post-embryonic development	37/6513	65/19652	6.754e-05	0.00100738	0.000772402	AT4G04350/AT1G25350/AT1G17580/AT1G50030/AT5G16715/AT4G15180/AT5G55300/AT3G27530/AT5G20490/AT1G14610/AT5G11530/AT5G49030/AT2G25420/AT5G57390/AT1G15750/AT5G13570/AT3G20440/AT5G27030/AT3G15880/AT1G55180/AT1G80490/AT3G16830/AT3G13300/AT2G32410/AT4G10320/AT4G13780/AT2G30280/AT2G25840/AT4G27630/AT1G64990/AT1G18560/AT4G26300/AT5G64050/AT1G66530/AT3G01570/AT5G07560/AT5G07600	37
GO:0042742	defense response to bacterium	124/6513	281/19652	7.26261e-05	0.00106518	0.000816725	AT3G14150/AT5G44510/AT1G16540/AT5G52640/AT1G79380/AT1G33980/AT4G00990/AT2G22300/AT5G46470/AT5G18525/AT3G44670/AT5G23570/AT1G59820/AT1G11350/AT2G39260/AT1G64790/AT1G02120/AT1G69220/AT3G19190/AT5G18370/AT4G37460/AT5G17880/AT1G32230/AT2G01830/AT3G43300/AT2G27040/AT5G42950/AT5G59830/AT4G35230/AT1G09770/AT5G45050/AT2G26330/AT2G41760/AT5G45250/AT5G63970/AT5G45060/AT2G30880/AT5G02310/AT5G56360/AT1G27320…	124
GO:0070588	calcium ion transmembrane transport	35/6513	61/19652	8.44903e-05	0.00121888	0.000934569	AT2G23790/AT5G53010/AT1G10130/AT2G23980/AT4G29900/AT5G57110/AT1G05200/AT3G51480/AT1G27770/AT2G17780/AT3G07520/AT4G00900/AT1G11960/AT5G57940/AT4G35290/AT2G34020/AT2G32390/AT1G42540/AT3G63380/AT2G41560/AT5G27100/AT2G17260/AT4G03560/AT3G57330/AT1G64150/AT5G14870/AT1G55730/AT3G22910/AT1G07810/AT3G21180/AT4G30560/AT4G35920/AT3G04110/AT2G32400/AT5G48400	35
GO:0006896	Golgi to vacuole transport	10/6513	11/19652	0.000122354	0.00170153	0.00130464	AT5G26980/AT3G55480/AT4G02195/AT1G10290/AT1G60070/AT5G06140/AT3G05710/AT3G50860/AT5G16830/AT3G52850	10
GO:0031507	heterochromatin formation	10/6513	11/19652	0.000122354	0.00170153	0.00130464	AT1G09060/AT4G02020/AT5G66750/AT2G27040/AT1G65470/AT5G17690/AT2G28240/AT1G08060/AT5G04290/AT5G64630	10
GO:0006886	intracellular protein transport	75/6513	158/19652	0.000123748	0.00170153	0.00130464	AT1G23935/AT5G06120/AT3G61480/AT5G28350/AT3G56450/AT3G09560/AT5G26980/AT3G55480/AT4G00800/AT1G22860/AT5G66160/AT1G26170/AT1G21650/AT3G03110/AT3G15980/AT3G27530/AT3G43300/AT4G01800/AT3G29100/AT1G24460/AT3G08960/AT2G38020/AT3G44340/AT1G79990/AT4G02195/AT1G52360/AT3G17340/AT5G62600/AT3G08530/AT2G36070/AT5G22770/AT1G48550/AT1G73430/AT1G10730/AT2G27460/AT1G23900/AT4G32640/AT3G23660/AT4G23460/AT1G48760…	75
GO:0006914	autophagy	30/6513	51/19652	0.000144506	0.00195639	0.00150006	AT2G37840/AT2G46240/AT1G49180/AT4G02030/AT5G47480/AT4G30790/AT5G54730/AT3G53930/AT3G19190/AT5G47490/AT1G54710/AT3G49590/AT3G61710/AT5G66930/AT4G29380/AT3G61960/AT1G03380/AT4G36630/AT3G62770/AT5G24360/AT4G30510/AT5G45900/AT3G56440/AT1G54210/AT3G18770/AT4G04620/AT3G59950/AT2G40810/AT5G17290/AT3G06420	30
GO:0006816	calcium ion transport	29/6513	49/19652	0.000160023	0.00213364	0.00163596	AT4G32060/AT2G23790/AT5G53010/AT1G10130/AT4G29900/AT5G57110/AT1G05200/AT3G51480/AT1G27770/AT3G07520/AT4G00900/AT4G35290/AT2G32390/AT1G42540/AT3G63380/AT2G41560/AT5G27100/AT2G17260/AT4G03560/AT3G57330/AT1G64150/AT1G55730/AT3G22910/AT1G07810/AT3G21180/AT4G35920/AT3G04110/AT2G32400/AT5G48400	29
GO:0006265	DNA topological change	11/6513	13/19652	0.000199629	0.00258344	0.00198084	AT5G55310/AT4G31210/AT3G20780/AT5G63920/AT5G55300/AT3G23890/AT5G04130/AT2G32000/AT3G10690/AT5G04110/AT3G10270	11
GO:0051026	chiasma assembly	11/6513	13/19652	0.000199629	0.00258344	0.00198084	AT1G01690/AT3G20475/AT3G27730/AT5G57880/AT1G03180/AT1G14750/AT3G22880/AT1G53490/AT3G13170/AT1G63990/AT1G67370	11
GO:2000028	regulation of photoperiodism, flowering	35/6513	63/19652	0.000203601	0.00259665	0.00199097	AT3G02890/AT4G11560/AT5G16680/AT4G03110/AT4G00990/AT4G21430/AT5G65060/AT5G23570/AT5G01270/AT2G25930/AT2G47700/AT1G76380/AT5G55040/AT5G40340/AT1G20670/AT3G20810/AT3G48430/AT3G24870/AT5G27650/AT3G10390/AT4G37900/AT3G09670/AT1G03457/AT5G42900/AT4G26150/AT4G35900/AT5G64610/AT5G62640/AT3G22231/AT3G21320/AT2G46340/AT2G42280/AT4G33980/AT1G77180/AT1G22770	35
GO:0071805	potassium ion transmembrane transport	30/6513	52/19652	0.000233761	0.00293871	0.00225325	AT2G23980/AT4G00630/AT5G11800/AT2G35060/AT1G30270/AT2G19600/AT2G01980/AT4G18290/AT4G22200/AT1G01790/AT1G31120/AT5G13750/AT1G60160/AT5G37500/AT5G51710/AT1G30450/AT4G33530/AT2G26650/AT5G46240/AT5G09400/AT2G30070/AT4G32650/AT4G32500/AT4G30560/AT1G05580/AT2G25600/AT3G04110/AT2G24610/AT1G70300/AT5G14880	30
GO:0007062	sister chromatid cohesion	12/6513	15/19652	0.000266679	0.00327731	0.00251287	AT5G07660/AT5G61460/AT5G15540/AT2G27170/AT5G15920/AT3G54670/AT1G04730/AT5G16270/AT5G40840/AT3G59550/AT5G05490/AT4G15890	12
GO:0010228	vegetative to reproductive phase transition of meristem	52/6513	104/19652	0.000268144	0.00327731	0.00251287	AT1G10570/AT3G57300/AT1G05830/AT1G01040/AT2G46240/AT3G12140/AT1G76710/AT4G12680/AT1G55250/AT2G23380/AT1G03160/AT5G44180/AT2G31650/AT2G44950/AT1G60220/AT4G32980/AT4G15180/AT3G04240/AT5G55390/AT3G06400/AT5G18620/AT4G02560/AT2G43410/AT1G28420/AT2G15530/AT3G03140/AT3G48430/AT2G39810/AT5G06780/AT3G10390/AT3G28730/AT2G02560/AT3G10490/AT1G20960/AT5G42900/AT4G00650/AT4G27630/AT5G02030/AT4G10710/AT4G34040…	52
GO:0009658	chloroplast organization	70/6513	149/19652	0.000299239	0.00360727	0.00276586	AT5G67570/AT5G22640/AT4G00630/AT1G10910/AT5G26980/AT5G02250/AT4G20130/AT4G35780/AT3G19180/AT4G04850/AT1G30610/AT2G31530/AT3G24560/AT2G48120/AT3G04340/AT4G01800/AT2G04270/AT3G47390/AT2G24060/AT3G62910/AT5G63420/AT4G34020/AT4G02195/AT2G47940/AT5G58270/AT3G19570/AT4G23940/AT1G01790/AT5G18570/AT5G16620/AT5G19620/AT4G38470/AT5G53080/AT5G61670/AT1G63900/AT4G13670/AT5G35220/AT5G42310/AT1G06950/AT1G49970…	70
GO:0006306	DNA methylation	14/6513	19/19652	0.00035353	0.00420414	0.00322351	AT2G36490/AT5G04560/AT2G27040/AT3G48670/AT1G15215/AT5G14620/AT2G32940/AT5G15380/AT5G04290/AT2G40030/AT4G26170/AT2G30280/AT3G17310/AT2G16390	14
GO:0030036	actin cytoskeleton organization	18/6513	27/19652	0.000372198	0.00436712	0.00334848	AT2G34150/AT1G29170/AT4G18600/AT2G38440/AT5G18410/AT5G35700/AT3G27000/AT3G13870/AT3G05470/AT4G15200/AT5G54650/AT3G25500/AT5G01730/AT1G59910/AT5G67470/AT1G24150/AT1G70140/AT2G43800	18
GO:0015031	protein transport	245/6513	620/19652	0.00041688	0.00482704	0.00370111	AT2G37840/AT1G50970/AT1G23935/AT4G19490/AT3G10380/AT5G22640/AT1G50500/AT5G08470/AT1G55690/AT2G25660/AT1G02010/AT1G49180/AT2G21520/AT1G75850/AT3G56450/AT1G21170/AT1G03000/AT1G50730/AT1G19650/AT5G26980/AT4G02030/AT1G59820/AT3G55480/AT5G47480/AT4G30790/AT2G31530/AT1G22860/AT5G66160/AT5G54730/AT3G53930/AT1G21650/AT2G32900/AT3G24840/AT2G25350/AT3G03110/AT5G03540/AT3G19190/AT3G15980/AT1G13120/AT3G27530…	245
GO:0009910	negative regulation of flower development	24/6513	40/19652	0.000438463	0.005011	0.00384217	AT5G65050/AT1G30970/AT5G65060/AT2G31650/AT3G33520/AT5G61150/AT5G51230/AT3G04240/AT5G65070/AT5G16260/AT1G79280/AT5G11530/AT5G23150/AT5G60410/AT1G79730/AT4G20400/AT5G17690/AT1G61040/AT3G05040/AT5G49160/AT5G60800/AT4G00650/AT4G26150/AT5G13790	24
GO:0007015	actin filament organization	27/6513	47/19652	0.000521114	0.00587924	0.00450788	AT2G29890/AT4G28710/AT2G20290/AT3G57410/AT4G33200/AT2G33240/AT1G17580/AT1G04160/AT1G75100/AT2G41740/AT5G43900/AT5G20490/AT1G08730/AT5G57320/AT3G27000/AT2G40820/AT1G04600/AT4G30160/AT1G54560/AT2G35110/AT4G14147/AT2G31900/AT1G30825/AT2G30910/AT1G60430/AT2G26770/AT1G01750	27
GO:0005982	starch metabolic process	11/6513	14/19652	0.000650646	0.00689842	0.00528934	AT2G36390/AT4G18240/AT1G67140/AT5G22510/AT5G03650/AT5G26570/AT5G49190/AT3G22380/AT3G52180/AT4G02280/AT4G24620	11
GO:0016573	histone acetylation	11/6513	14/19652	0.000650646	0.00689842	0.00528934	AT1G55970/AT3G12980/AT1G79000/AT1G16710/AT3G33520/AT5G09740/AT3G54610/AT1G67220/AT1G49540/AT5G64610/AT3G19040	11
GO:0031349	positive regulation of defense response	11/6513	14/19652	0.000650646	0.00689842	0.00528934	AT4G36280/AT1G19100/AT4G24970/AT1G25540/AT4G36290/AT5G50780/AT4G08850/AT1G49540/AT5G36890/AT5G13130/AT1G02660	11
GO:0048589	developmental growth	11/6513	14/19652	0.000650646	0.00689842	0.00528934	AT1G63490/AT5G01270/AT1G08620/AT2G36850/AT5G60410/AT3G07160/AT5G53460/AT4G20400/AT5G13530/AT2G28350/AT1G71800	11
GO:0071482	cellular response to light stimulus	11/6513	14/19652	0.000650646	0.00689842	0.00528934	AT2G36390/AT3G53920/AT2G36990/AT2G48120/AT2G30170/AT1G64860/AT5G03650/AT5G13730/AT1G08540/AT3G08550/AT5G24120	11
GO:0007059	chromosome segregation	24/6513	41/19652	0.000726813	0.00761423	0.00583819	AT5G63920/AT5G15540/AT5G04320/AT2G27170/AT1G61030/AT2G32900/AT3G54670/AT5G55300/AT3G10440/AT1G11060/AT2G47980/AT4G22970/AT5G16270/AT2G20635/AT5G40840/AT5G51340/AT5G57880/AT3G59550/AT5G16800/AT1G12790/AT5G05490/AT3G48210/AT1G63990/AT3G02980	24
GO:0009556	microsporogenesis	17/6513	26/19652	0.000761156	0.0078802	0.00604212	AT5G57790/AT5G47690/AT4G31880/AT1G15110/AT2G36850/AT1G15940/AT1G34210/AT3G07160/AT1G31810/AT5G18700/AT1G71830/AT2G13680/AT1G02065/AT1G77390/AT4G15890/AT3G11980/AT3G47870	17
GO:0042147	retrograde transport, endosome to Golgi	13/6513	18/19652	0.000796893	0.00815425	0.00625224	AT1G50970/AT4G19490/AT1G50500/AT3G61480/AT1G75850/AT1G50730/AT4G02030/AT2G27900/AT3G51310/AT2G17790/AT1G50120/AT1G48550/AT5G64990	13
GO:0006302	double-strand break repair	15/6513	22/19652	0.000815321	0.00818353	0.0062747	AT2G31970/AT5G61460/AT3G20540/AT5G57160/AT1G48050/AT3G02680/AT5G54260/AT4G30870/AT1G10520/AT5G16270/AT1G08130/AT5G40840/AT3G23100/AT1G61410/AT5G21140	15
GO:0007030	Golgi organization	14/6513	20/19652	0.000818353	0.00818353	0.0062747	AT2G46180/AT1G18190/AT2G19950/AT5G26980/AT4G02030/AT3G61570/AT4G02195/AT1G73430/AT1G71830/AT5G11980/AT3G07100/AT4G24840/AT3G05710/AT4G04910	14
GO:0009965	leaf morphogenesis	29/6513	53/19652	0.000972073	0.00961151	0.00736959	AT1G52150/AT3G23980/AT1G55250/AT2G23380/AT2G44950/AT1G48410/AT5G55300/AT4G36380/AT1G77600/AT2G48120/AT2G26330/AT5G67100/AT5G55540/AT5G13300/AT5G08370/AT3G05040/AT5G55920/AT3G20630/AT3G13300/AT4G03550/AT5G13680/AT2G01500/AT2G01940/AT1G68130/AT4G36870/AT2G23760/AT4G18710/AT1G68480/AT3G09000	29
GO:0000165	MAPK cascade	25/6513	44/19652	0.00103709	0.0101404	0.00777511	AT1G53510/AT4G08470/AT4G08480/AT1G08720/AT2G01450/AT2G42880/AT1G53570/AT5G19010/AT5G66850/AT3G18040/AT1G54960/AT1G73670/AT1G63700/AT1G09000/AT1G07880/AT4G36450/AT4G26070/AT3G14720/AT5G40440/AT1G77720/AT3G45640/AT3G06030/AT4G08500/AT2G46070/AT1G59580	25
GO:0044238	primary metabolic process	33/6513	63/19652	0.00123317	0.0119038	0.00912721	AT5G35170/AT2G42330/AT3G28030/AT3G02030/AT1G07745/AT5G05570/AT5G41130/AT5G41120/AT4G21060/AT3G06580/AT3G43840/AT1G01220/AT3G26840/AT5G47840/AT1G26810/AT4G31050/AT3G13440/AT2G42780/AT4G16130/AT5G08550/AT3G20930/AT2G21070/AT5G24490/AT1G54570/AT1G53260/AT3G10700/AT2G28560/AT5G44780/AT1G74800/AT1G47578/AT1G27120/AT1G17070/AT5G09210	33
GO:0009626	plant-type hypersensitive response	38/6513	75/19652	0.00124449	0.0119038	0.00912721	AT4G03110/AT4G36280/AT1G32540/AT1G02120/AT5G44870/AT5G18370/AT4G02640/AT4G12560/AT1G26190/AT1G30460/AT5G45250/AT4G36290/AT4G20400/AT1G71220/AT4G19040/AT1G64280/AT5G51450/AT3G48090/AT4G24290/AT5G43470/AT5G14930/AT1G12220/AT1G59870/AT4G12010/AT4G25230/AT1G28380/AT4G18470/AT1G08450/AT3G46530/AT3G07040/AT3G25070/AT3G45640/AT1G14780/AT3G50930/AT3G48080/AT1G22070/AT3G50480/AT1G02860	38
GO:0009903	chloroplast avoidance movement	9/6513	11/19652	0.00130492	0.0120876	0.00926816	AT5G65460/AT5G38150/AT3G45780/AT2G26570/AT1G75100/AT5G10470/AT1G66840/AT1G42550/AT5G20610	9
GO:0046470	phosphatidylcholine metabolic process	9/6513	11/19652	0.00130492	0.0120876	0.00926816	AT4G11830/AT4G11840/AT1G52570/AT4G00240/AT1G55180/AT4G11850/AT4G35790/AT5G25370/AT3G15830	9
GO:0051171	regulation of nitrogen compound metabolic process	9/6513	11/19652	0.00130492	0.0120876	0.00926816	AT3G59410/AT4G27910/AT3G07740/AT3G61740/AT5G53430/AT4G16420/AT5G09790/AT4G34430/AT3G03910	9
GO:0009408	response to heat	79/6513	179/19652	0.00134849	0.0123612	0.00947788	AT2G46240/AT1G74310/AT1G50500/AT1G16540/AT3G18520/AT2G23980/AT5G53170/AT1G79350/AT5G23570/AT5G18065/AT4G13550/AT3G12580/AT1G15520/AT1G48050/AT2G26150/AT1G78080/AT3G06010/AT5G57560/AT1G59860/AT2G20180/AT2G46830/AT2G04030/AT1G16970/AT1G68820/AT2G25140/AT3G24320/AT4G29770/AT1G03190/AT3G48430/AT1G64280/AT1G16030/AT5G12020/AT1G09530/AT5G05410/AT1G07400/AT2G38470/AT4G20350/AT5G18040/AT1G66340/AT5G06780…	79
GO:0000398	mRNA splicing, via spliceosome	56/6513	120/19652	0.0013879	0.0125912	0.00965428	AT3G54230/AT1G10320/AT4G36690/AT5G37370/AT3G50670/AT1G55310/AT5G63370/AT1G60900/AT4G38780/AT3G48120/AT4G21660/AT1G03910/AT1G65660/AT3G61860/AT2G16860/AT5G16260/AT1G09230/AT5G52040/AT1G09770/AT4G25500/AT2G13540/AT5G16780/AT1G28060/AT5G06160/AT2G40650/AT5G13010/AT1G14650/AT3G05760/AT1G80070/AT2G41500/AT1G10580/AT1G80060/AT5G41770/AT5G08550/AT5G45990/AT3G13210/AT4G37120/AT1G60170/AT3G26560/AT4G03430…	56
GO:0007131	reciprocal meiotic recombination	17/6513	27/19652	0.00142238	0.0126434	0.0096943	AT5G23610/AT3G02680/AT4G14970/AT1G22275/AT4G35520/AT3G20475/AT1G22260/AT3G27730/AT1G12790/AT2G33793/AT5G52290/AT3G22880/AT1G53490/AT5G64520/AT3G13170/AT1G63990/AT5G51330	17
GO:0010305	leaf vascular tissue pattern formation	17/6513	27/19652	0.00142238	0.0126434	0.0096943	AT3G54720/AT4G02030/AT1G48410/AT4G07410/AT1G05470/AT2G32010/AT5G16780/AT5G55540/AT4G13750/AT1G11130/AT1G19850/AT3G63300/AT4G20910/AT2G01950/AT3G44600/AT1G09700/AT2G36120	17
GO:0010073	meristem maintenance	22/6513	38/19652	0.0014687	0.0129245	0.00990984	AT1G52150/AT5G19740/AT2G32700/AT2G25010/AT1G08840/AT4G32980/AT4G07410/AT5G23630/AT1G50750/AT1G32120/AT4G32551/AT5G02130/AT3G51290/AT1G17930/AT3G54170/AT1G50770/AT1G17240/AT4G36920/AT3G02130/AT5G18510/AT2G04865/AT4G16050	22
GO:0002758	innate immune response-activating signaling pathway	10/6513	13/19652	0.0015617	0.0133427	0.0102304	AT5G45050/AT5G45250/AT5G45060/AT5G60410/AT3G44480/AT4G03550/AT1G80680/AT1G33520/AT4G19530/AT2G32680	10
GO:0007178	transmembrane receptor protein serine/threonine kinase signaling pathway	10/6513	13/19652	0.0015617	0.0133427	0.0102304	AT2G13790/AT5G49760/AT2G13800/AT1G71830/AT5G46330/AT5G38280/AT3G45390/AT3G45410/AT2G01950/AT4G28350	10
GO:0043328	protein transport to vacuole involved in ubiquitin-dependent protein catabolic process via the multivesicular body sorting pathway	10/6513	13/19652	0.0015617	0.0133427	0.0102304	AT5G16880/AT5G04920/AT1G15130/AT4G32760/AT1G76970/AT1G21380/AT5G63640/AT5G01760/AT2G38410/AT3G08790	10
GO:0006270	DNA replication initiation	11/6513	15/19652	0.00170656	0.0141695	0.0108644	AT1G77320/AT2G07690/AT5G44635/AT5G46280/AT2G20980/AT1G44900/AT2G16440/AT2G29680/AT1G80190/AT1G07270/AT1G67320	11
GO:0010267	ta-siRNA processing	11/6513	15/19652	0.00170656	0.0141695	0.0108644	AT3G03300/AT1G01040/AT5G20320/AT5G23570/AT3G43920/AT3G15390/AT5G09860/AT3G49500/AT2G27100/AT3G10490/AT1G09700	11
GO:0007033	vacuole organization	14/6513	21/19652	0.00170678	0.0141695	0.0108644	AT1G77220/AT2G26890/AT2G38020/AT4G33240/AT3G14270/AT2G01690/AT5G04920/AT1G03060/AT1G17260/AT1G15130/AT3G54860/AT4G36630/AT2G28390/AT4G38360	14
GO:0000184	nuclear-transcribed mRNA catabolic process, nonsense-mediated decay	13/6513	19/19652	0.00175751	0.014373	0.0110205	AT1G33980/AT3G01540/AT5G19400/AT2G39260/AT1G15280/AT5G16260/AT4G21670/AT5G47010/AT5G13570/AT3G06480/AT1G55150/AT1G22760/AT5G63120	13
GO:0000723	telomere maintenance	12/6513	17/19652	0.00176396	0.014373	0.0110205	AT1G79950/AT4G09680/AT2G05210/AT2G31970/AT3G48900/AT1G48050/AT1G16970/AT4G30870/AT5G06310/AT2G04395/AT5G13820/AT5G16850	12
GO:0006897	endocytosis	24/6513	43/19652	0.00181629	0.0145303	0.0111411	AT3G56960/AT5G54280/AT1G60490/AT2G26890/AT3G43300/AT3G58600/AT3G08530/AT5G13300/AT4G05520/AT5G22770/AT5G35200/AT5G22780/AT1G14910/AT3G20290/AT3G11130/AT3G01780/AT2G01600/AT5G05190/AT1G03050/AT4G25940/AT5G57200/AT4G02650/AT1G33340/AT1G13980	24
GO:0048511	rhythmic process	24/6513	43/19652	0.00181629	0.0145303	0.0111411	AT3G54500/AT5G02810/AT2G25930/AT5G05660/AT5G60100/AT2G47700/AT2G21150/AT3G09600/AT2G46830/AT5G61380/AT5G17300/AT1G01060/AT3G11540/AT5G42900/AT2G31870/AT3G22380/AT4G37520/AT1G31500/AT5G24470/AT1G68050/AT4G33980/AT1G77180/AT5G37260/AT1G22770	24
GO:0006417	regulation of translation	43/6513	89/19652	0.00208596	0.0165373	0.0126799	AT3G59410/AT2G27880/AT3G20250/AT5G17930/AT5G16180/AT2G29140/AT5G21150/AT3G10360/AT1G15280/AT1G48410/AT3G17040/AT1G72320/AT5G43810/AT2G36660/AT2G27040/AT5G42950/AT1G80930/AT4G30680/AT2G45810/AT3G60240/AT1G73180/AT3G16810/AT4G25880/AT5G56510/AT2G29200/AT2G32940/AT5G55550/AT5G42310/AT5G53180/AT2G29190/AT5G24490/AT1G22760/AT5G45330/AT1G43190/AT3G01150/AT1G78160/AT3G16380/AT3G61240/AT1G35730/AT1G26110…	43
GO:0051028	mRNA transport	33/6513	65/19652	0.00242738	0.0190723	0.0146236	AT1G33980/AT1G15280/AT3G03110/AT1G13120/AT1G79280/AT1G75340/AT5G02770/AT1G66260/AT1G24706/AT1G55540/AT5G09860/AT4G11790/AT2G45810/AT3G14120/AT1G59660/AT5G40480/AT1G10390/AT3G57350/AT3G10650/AT5G05680/AT4G32910/AT5G42920/AT1G14850/AT5G17020/AT1G80680/AT2G45000/AT4G04910/AT1G52380/AT1G24310/AT2G41620/AT3G61240/AT4G00660/AT5G16790	33
GO:0006508	proteolysis	196/6513	501/19652	0.00254961	0.0198554	0.0152241	AT3G57470/AT1G10570/AT2G24280/AT2G22980/AT4G21326/AT1G35340/AT5G19740/AT1G02300/AT3G54720/AT5G53170/AT5G44530/AT3G26085/AT1G73310/AT5G53350/AT4G30910/AT1G33360/AT1G73990/AT1G28320/AT2G40930/AT3G50050/AT1G12750/AT1G71696/AT1G60220/AT1G20380/AT4G21640/AT2G41790/AT5G65450/AT1G05840/AT3G57680/AT5G19660/AT1G67420/AT1G69100/AT4G20430/AT3G04340/AT3G06820/AT5G67170/AT2G27350/AT5G49840/AT1G67690/AT3G11910…	196
GO:0031347	regulation of defense response	27/6513	51/19652	0.00272586	0.0210417	0.0161337	AT4G39050/AT5G19400/AT4G08480/AT4G00020/AT1G17380/AT5G55390/AT5G42950/AT4G14720/AT3G07780/AT4G14713/AT5G40820/AT5G66130/AT4G35580/AT3G56400/AT4G32570/AT4G31800/AT4G02550/AT1G80840/AT1G72300/AT2G02220/AT4G23810/AT3G27960/AT5G45770/AT4G17680/AT3G02150/AT1G72450/AT2G29350	27
GO:0006259	DNA metabolic process	16/6513	26/19652	0.00275858	0.0211091	0.0161854	AT5G44750/AT3G32920/AT1G08840/AT3G23890/AT1G29630/AT1G06670/AT5G44740/AT1G10520/AT5G10950/AT3G10690/AT5G60370/AT3G22880/AT3G10140/AT3G13170/AT1G63990/AT3G46210	16
GO:0048364	root development	79/6513	183/19652	0.0028249	0.0214303	0.0164316	AT2G31280/AT1G79950/AT1G10130/AT3G54720/AT2G25170/AT1G01950/AT1G05630/AT1G59820/AT1G78580/AT1G06150/AT2G20000/AT3G54010/AT5G03540/AT3G16785/AT5G24630/AT1G24460/AT5G44280/AT5G16780/AT5G63770/AT1G17110/AT4G03090/AT1G06230/AT5G58270/AT1G36160/AT5G57390/AT2G25180/AT5G13010/AT5G13750/AT2G39830/AT4G04920/AT1G78240/AT5G24310/AT1G55180/AT2G35680/AT3G05040/AT2G23140/AT4G13750/AT5G10510/AT5G05980/AT4G24560…	79
GO:0006811	monoatomic ion transport	153/6513	384/19652	0.0031773	0.0233724	0.0179207	AT5G02940/AT4G32060/AT2G23790/AT5G43745/AT1G10130/AT4G02900/AT5G21930/AT1G54370/AT2G23980/AT4G00630/AT2G46450/AT5G11800/AT2G35060/AT5G26240/AT1G16780/AT2G24520/AT1G30270/AT3G42640/AT5G50160/AT3G01100/AT4G04850/AT2G29650/AT5G10490/AT4G29900/AT3G17700/AT5G09690/AT2G19600/AT5G64560/AT2G01980/AT3G58810/AT3G06450/AT1G58200/AT5G57110/AT1G05200/AT1G14660/AT3G51480/AT2G48060/AT4G18290/AT1G27770/AT1G15960…	153
GO:0000045	autophagosome assembly	8/6513	10/19652	0.00325891	0.0233724	0.0179207	AT4G30790/AT3G19190/AT3G49590/AT3G61710/AT5G66930/AT3G50590/AT1G54210/AT3G18770	8
GO:0006346	DNA methylation-dependent heterochromatin formation	8/6513	10/19652	0.00325891	0.0233724	0.0179207	AT5G66750/AT1G54440/AT1G15215/AT5G14620/AT5G15380/AT1G60170/AT2G16390/AT1G09320	8
GO:0010239	chloroplast mRNA processing	8/6513	10/19652	0.00325891	0.0233724	0.0179207	AT5G27270/AT1G30610/AT2G35130/AT2G48120/AT2G04270/AT5G08720/AT5G42310/AT2G41720	8
GO:0036297	interstrand cross-link repair	8/6513	10/19652	0.00325891	0.0233724	0.0179207	AT1G79950/AT1G48360/AT5G65740/AT5G08110/AT5G22750/AT5G03450/AT1G35530/AT5G44010	8
GO:0080090	regulation of primary metabolic process	8/6513	10/19652	0.00325891	0.0233724	0.0179207	AT3G59410/AT4G27910/AT3G07740/AT3G61740/AT5G53430/AT4G16420/AT5G09790/AT4G34430	8
GO:0042127	regulation of cell population proliferation	14/6513	22/19652	0.00326682	0.0233724	0.0179207	AT4G37750/AT1G69220/AT1G63980/AT5G13060/AT4G16420/AT4G14713/AT1G55350/AT2G26300/AT5G55920/AT3G20630/AT1G11130/AT3G26090/AT1G44900/AT5G50915	14
GO:0019252	starch biosynthetic process	19/6513	33/19652	0.00333227	0.0236484	0.0181323	AT1G11720/AT2G36390/AT5G19220/AT4G18240/AT5G65685/AT5G04360/AT1G27070/AT2G39930/AT5G03420/AT2G21590/AT3G30720/AT3G20440/AT5G03650/AT4G39210/AT3G16000/AT4G32190/AT4G10260/AT1G27680/AT5G51820	19
GO:0005991	trehalose metabolic process	9/6513	12/19652	0.00367781	0.025484	0.0195398	AT1G67140/AT1G78580/AT1G68020/AT1G70290/AT1G06410/AT2G18700/AT1G60140/AT4G24040/AT4G27550	9
GO:0007064	mitotic sister chromatid cohesion	9/6513	12/19652	0.00367781	0.025484	0.0195398	AT1G80810/AT1G61030/AT5G47690/AT4G31880/AT1G77600/AT1G11060/AT1G15940/AT5G10950/AT5G51340	9
GO:0034765	regulation of monoatomic ion transmembrane transport	9/6513	12/19652	0.00367781	0.025484	0.0195398	AT4G18290/AT4G28610/AT4G22200/AT5G37500/AT2G26650/AT5G46240/AT4G32650/AT4G32500/AT2G25600	9
GO:0006402	mRNA catabolic process	18/6513	31/19652	0.00374653	0.0255577	0.0195963	AT5G21160/AT4G03110/AT2G47220/AT1G54490/AT2G17970/AT5G13570/AT3G13290/AT1G14710/AT3G13300/AT5G61780/AT1G03457/AT5G07350/AT3G03710/AT1G80780/AT5G14580/AT2G45620/AT2G48080/AT4G36090	18
GO:0009561	megagametogenesis	18/6513	31/19652	0.00374653	0.0255577	0.0195963	AT5G57790/AT4G31610/AT5G45140/AT3G63480/AT3G06400/AT1G29940/AT2G04660/AT5G38970/AT3G56990/AT3G59550/AT4G14790/AT1G01960/AT5G40740/AT4G14220/AT5G22000/AT4G31615/AT3G60360/AT2G18080	18
GO:0007129	homologous chromosome pairing at meiosis	11/6513	16/19652	0.00382542	0.0257909	0.0197751	AT1G48360/AT3G63480/AT4G14970/AT1G22275/AT4G30870/AT1G22260/AT3G12280/AT4G17380/AT3G13170/AT1G63990/AT1G67370	11
GO:0006996	organelle organization	10/6513	14/19652	0.00383932	0.0257909	0.0197751	AT2G31970/AT4G30790/AT4G28080/AT1G15290/AT3G52140/AT1G01320/AT1G63900/AT1G77720/AT1G59560/AT1G54150	10
GO:0006813	potassium ion transport	40/6513	84/19652	0.00405134	0.027009	0.020709	AT5G02940/AT1G54370/AT2G23980/AT4G00630/AT5G11800/AT2G35060/AT1G30270/AT4G04850/AT2G19600/AT2G01980/AT1G14660/AT4G18290/AT3G46960/AT1G79610/AT4G22200/AT1G01790/AT1G31120/AT1G60160/AT5G37500/AT3G05030/AT5G51710/AT5G55470/AT1G30450/AT3G17630/AT4G33530/AT2G26650/AT5G46240/AT3G44900/AT5G09400/AT2G30070/AT4G32650/AT4G32500/AT4G30560/AT1G05580/AT2G25600/AT3G04110/AT2G24610/AT1G70300/AT1G08150/AT5G14880	40
GO:0006623	protein targeting to vacuole	17/6513	29/19652	0.00420303	0.0278095	0.0213228	AT5G18525/AT3G50380/AT4G00800/AT5G24740/AT2G26890/AT1G24460/AT3G61710/AT1G48090/AT2G32760/AT5G06140/AT1G08190/AT2G14720/AT5G11710/AT2G28390/AT2G14740/AT5G16830/AT3G52850	17
GO:0051707	response to other organism	26/6513	50/19652	0.00446346	0.0293123	0.0224751	AT3G14150/AT4G19510/AT5G35450/AT1G53350/AT1G58602/AT1G59620/AT5G48620/AT3G14470/AT3G13100/AT1G58400/AT1G10920/AT1G50180/AT3G14460/AT1G59124/AT3G53160/AT5G45500/AT5G43470/AT1G58807/AT2G04450/AT3G46530/AT3G07040/AT5G45520/AT1G58410/AT4G18360/AT1G58848/AT4G34131	26
GO:0045037	protein import into chloroplast stroma	15/6513	25/19652	0.00524211	0.0340465	0.0261051	AT5G22640/AT1G16540/AT3G04340/AT3G16290/AT5G64580/AT2G04030/AT4G23940/AT1G79560/AT5G16620/AT1G63900/AT1G06950/AT3G48870/AT4G02510/AT5G01590/AT5G50920	15
GO:0045892	negative regulation of DNA-templated transcription	78/6513	184/19652	0.00526174	0.0340465	0.0261051	AT3G48710/AT1G10450/AT5G15020/AT2G32700/AT5G02810/AT1G70060/AT4G32730/AT2G25170/AT4G14920/AT5G44180/AT5G63320/AT1G24190/AT3G01320/AT5G67320/AT1G03770/AT4G26630/AT4G37460/AT1G17760/AT4G21670/AT3G02860/AT1G59750/AT4G19190/AT2G27350/AT5G11530/AT5G44280/AT1G59890/AT5G63550/AT2G46830/AT4G06634/AT4G20400/AT1G43850/AT1G28420/AT1G15750/AT4G32551/AT5G37380/AT2G30470/AT2G39810/AT1G05380/AT5G17690/AT5G43170…	78
GO:0072583	clathrin-dependent endocytosis	17/6513	30/19652	0.00673225	0.0432437	0.0331569	AT4G12780/AT1G59610/AT4G12770/AT3G07960/AT5G22770/AT5G35200/AT5G22780/AT1G14910/AT4G34660/AT3G11130/AT2G01600/AT1G03050/AT5G24710/AT4G25940/AT5G57200/AT4G02650/AT1G33340	17
GO:0010090	trichome morphogenesis	20/6513	37/19652	0.00693045	0.0435628	0.0334016	AT1G05230/AT5G45190/AT1G17580/AT5G24630/AT4G01800/AT5G43900/AT5G20490/AT2G38440/AT2G46225/AT5G18410/AT3G16630/AT1G19835/AT3G27000/AT5G24310/AT1G03060/AT2G35110/AT3G12280/AT4G19600/AT1G30825/AT5G22220	20
GO:0043170	macromolecule metabolic process	20/6513	37/19652	0.00693045	0.0435628	0.0334016	AT2G42330/AT1G33410/AT2G36390/AT1G07745/AT4G09020/AT5G04360/AT2G39930/AT5G03650/AT4G27650/AT2G42780/AT5G08550/AT3G20930/AT5G47880/AT1G53260/AT1G57820/AT2G28560/AT5G44780/AT5G39550/AT1G17070/AT5G09210	20
GO:1900150	regulation of defense response to fungus	20/6513	37/19652	0.00693045	0.0435628	0.0334016	AT1G08720/AT2G46380/AT1G53570/AT4G06634/AT4G02195/AT3G25020/AT4G23570/AT4G19040/AT5G66850/AT2G28290/AT4G01090/AT5G18610/AT3G61670/AT1G01440/AT1G13960/AT5G53060/AT3G22231/AT5G05190/AT4G16380/AT4G14400	20
GO:0010492	maintenance of shoot apical meristem identity	12/6513	19/19652	0.00702484	0.043843	0.0336164	AT5G01770/AT5G19310/AT4G37750/AT1G03770/AT3G06010/AT5G44280/AT2G25180/AT4G11920/AT3G07780/AT3G08850/AT5G10510/AT3G16857	12
GO:0006351	DNA-templated transcription	50/6513	112/19652	0.00721187	0.0446933	0.0342684	AT3G05380/AT3G61420/AT1G68990/AT4G11560/AT3G18090/AT2G24120/AT4G21710/AT5G15700/AT5G08130/AT1G55750/AT5G49530/AT5G45140/AT3G49000/AT5G25520/AT3G21430/AT5G60040/AT1G29940/AT3G13960/AT5G61380/AT3G57660/AT5G38860/AT5G27610/AT1G63020/AT4G35800/AT2G41340/AT3G10490/AT2G22840/AT5G10030/AT2G40030/AT3G03570/AT5G11430/AT3G44530/ATCG00190/AT5G65210/AT5G06839/AT4G40050/AT1G18400/AT1G60620/AT4G37740/AT2G36400…	50
GO:0071230	cellular response to amino acid stimulus	11/6513	17/19652	0.00760476	0.0467985	0.0358826	AT1G05200/AT3G51480/AT3G07520/AT4G35290/AT2G32390/AT1G42540/AT5G27100/AT2G17260/AT3G04110/AT2G32400/AT5G48400	11
GO:0009845	seed germination	37/6513	79/19652	0.00776766	0.047469	0.0363967	AT1G66730/AT2G46590/AT3G55850/AT3G33520/AT5G08450/AT5G44280/AT2G36270/AT4G03090/AT5G01930/AT5G57390/AT1G43620/AT4G21540/AT1G34120/AT3G44730/AT2G26300/AT5G61780/AT2G32390/AT4G21750/AT4G03560/AT4G09140/AT5G53180/AT1G60170/AT1G74360/AT4G32320/AT5G01560/AT4G03430/AT4G04890/AT1G30010/AT3G25230/AT3G07130/AT2G18470/AT1G03120/AT3G01150/AT4G18010/AT3G03090/AT5G37260/AT5G35600	37
GO:0006352	DNA-templated transcription initiation	19/6513	35/19652	0.00792329	0.0478676	0.0367023	AT3G09360/AT3G53920/AT5G43130/AT2G36990/AT2G45100/AT3G13445/AT5G62950/AT1G64860/AT1G17440/AT5G13730/AT1G27720/AT1G08540/AT3G10070/AT2G01280/AT1G55520/AT4G35540/AT1G54140/AT4G14520/AT5G24120	19
GO:0001676	long-chain fatty acid metabolic process	10/6513	15/19652	0.00810486	0.0478676	0.0367023	AT5G27600/AT4G23850/AT1G77590/AT3G05970/AT1G49430/AT1G73680/AT1G64400/AT2G47240/AT5G37300/AT5G65110	10
GO:0016575	histone deacetylation	10/6513	15/19652	0.00810486	0.0478676	0.0367023	AT3G18520/AT5G67320/AT5G08450/AT4G33470/AT4G32620/AT5G61070/AT3G10390/AT5G26040/AT1G62830/AT5G35600	10
GO:0048731	system development	10/6513	15/19652	0.00810486	0.0478676	0.0367023	AT1G05830/AT2G31650/AT1G26330/AT2G46020/AT1G30810/AT1G08620/AT3G55400/AT4G20400/AT3G01460/AT2G28290	10
GO:2000024	regulation of leaf development	10/6513	15/19652	0.00810486	0.0478676	0.0367023	AT2G32700/AT5G55390/AT4G32551/AT1G55350/AT3G11220/AT5G13680/AT1G49540/AT3G07050/AT4G00180/AT5G14170	10
GO:0010332	response to gamma radiation	8/6513	11/19652	0.00846955	0.0487137	0.0373511	AT2G18760/AT3G05210/AT5G45610/AT4G21070/AT5G40820/AT3G19210/AT5G06150/AT4G37490	8
GO:0016441	post-transcriptional gene silencing	8/6513	11/19652	0.00846955	0.0487137	0.0373511	AT1G76630/AT1G48410/AT1G17760/AT3G46960/AT5G13570/AT3G10490/AT1G70070/AT1G71800	8
GO:0106074	aminoacyl-tRNA metabolism involved in translational fidelity	8/6513	11/19652	0.00846955	0.0487137	0.0373511	AT4G04350/AT5G16715/AT1G14610/AT5G49030/AT4G10320/AT2G03800/AT4G18460/AT3G23145	8
GO:0120029	proton export across plasma membrane	8/6513	11/19652	0.00846955	0.0487137	0.0373511	AT2G24520/AT3G42640/AT3G47950/AT5G62670/AT3G60330/AT1G17260/AT1G80660/AT2G18960	8
GO:0006970	response to osmotic stress	63/6513	147/19652	0.00853707	0.0487833	0.0374044	AT1G50500/AT1G16540/AT5G41790/AT5G01270/AT2G35510/AT3G33520/AT2G17820/AT1G32230/AT2G40190/AT1G78080/AT5G41580/AT1G59860/AT5G35750/AT4G06634/AT3G59770/AT1G27320/AT2G43850/AT5G53450/AT1G78290/AT3G58620/AT1G50460/AT4G04920/AT3G08730/AT2G38470/AT1G42550/AT1G55180/AT3G17510/AT3G19420/AT5G03280/AT4G35987/AT3G56400/AT1G55870/AT2G31870/AT3G43700/AT3G62770/AT1G53300/AT5G08560/AT3G50110/AT1G04220/AT3G61890…	63

## Sheet: phyb nAT DOWN
ID	Description	GeneRatio	BgRatio	pvalue	p.adjust	qvalue	geneID	Count
GO:0006412	translation	355/6143	681/19652	1.04457e-30	9.01461e-28	7.85075e-28	AT5G60390/AT1G07930/AT3G13920/AT1G56070/AT3G49910/AT3G27850/AT1G70600/AT5G17870/AT2G18020/AT4G15000/AT2G37270/AT1G07940/AT3G05590/AT1G57720/AT5G59850/AT4G31700/AT1G07920/AT3G22230/AT5G02870/AT2G47110/AT1G26630/AT5G18380/AT2G24090/AT1G04270/AT5G64140/AT4G36130/AT5G40950/AT3G54210/AT3G27830/AT3G53430/AT3G62250/AT3G09630/AT3G04230/AT2G09990/AT2G04390/AT4G34620/AT1G75350/AT3G55620/AT5G07090/AT1G29070…	355
GO:0015979	photosynthesis	120/6143	167/19652	3.40214e-27	1.46802e-24	1.27849e-24	AT4G09650/AT1G67090/AT5G38410/AT5G66570/AT4G02770/AT3G56090/AT3G21055/AT1G44575/AT2G05100/AT1G29920/AT5G16440/AT1G67740/AT2G06520/AT1G74470/AT4G28660/AT1G55670/AT4G10340/AT3G02780/AT1G52230/AT1G29930/AT3G54110/AT1G79040/AT4G12800/AT2G30570/AT2G40100/AT5G01530/AT3G54890/AT1G20950/AT1G31330/AT5G54270/AT1G61520/AT2G05070/AT1G15820/AT2G40300/AT1G29910/AT2G21970/AT3G14395/AT4G21280/AT1G53310/AT1G08380…	120
GO:0009409	response to cold	174/6143	332/19652	6.17158e-16	1.77536e-13	1.54614e-13	AT2G26250/AT4G24960/AT1G56070/AT4G39730/AT5G12250/AT3G47520/AT5G38480/AT4G09650/AT1G53240/AT5G54770/AT1G67090/AT3G17390/AT4G34710/AT2G36530/AT2G01570/AT5G15090/AT3G12780/AT2G05100/AT4G38680/AT3G52150/AT3G17020/AT2G39460/AT2G37220/AT5G38470/AT2G17840/AT4G24770/AT3G53460/AT3G55280/AT5G37770/AT2G33800/AT1G03680/AT4G36020/AT3G23000/AT5G58070/AT1G68530/AT5G65020/AT4G38840/AT4G28210/AT2G42540/AT2G27710…	174
GO:0006633	fatty acid biosynthetic process	73/6143	121/19652	3.7086e-11	7.64835e-09	6.66088e-09	AT2G26250/AT1G30120/AT1G54630/AT2G43710/AT2G33150/AT3G12120/AT1G54580/AT1G68530/AT1G24360/AT1G65290/AT3G55360/AT1G67730/AT5G42650/AT3G05020/AT5G10480/AT2G44620/AT1G11600/AT1G76680/AT4G30950/AT3G15850/AT1G10670/AT2G22230/AT1G06350/AT2G16280/AT3G02630/AT5G10160/AT5G46290/AT5G16240/AT2G26640/AT4G25050/AT1G07720/AT2G05990/AT5G48880/AT2G06050/AT5G35360/AT1G19440/AT5G51830/AT4G20870/AT1G06080/AT2G31360…	73
GO:0009853	photorespiration	40/6143	53/19652	4.43126e-11	7.64835e-09	6.66088e-09	AT1G47260/AT1G67090/AT5G38410/AT4G16450/AT1G79870/AT1G49140/AT3G54110/AT5G37510/AT2G33220/AT5G63510/AT5G66510/AT5G52840/AT3G48680/AT1G23310/AT2G27730/AT1G32080/AT1G04630/AT4G34700/AT2G02050/AT1G67350/AT4G00585/AT5G38420/AT5G38430/AT3G18410/AT1G19580/AT1G14450/AT2G31490/AT2G47690/AT2G13360/AT4G39660/AT4G00620/AT3G14420/AT3G12290/ATCG00490/AT1G68010/AT1G12550/AT5G47435/AT4G37930/AT5G36790/AT5G60335	40
GO:0008652	amino acid biosynthetic process	86/6143	159/19652	1.80272e-09	2.59292e-07	2.25815e-07	AT1G22410/AT3G13110/AT2G17265/AT4G34200/AT1G80600/AT1G75500/AT2G43090/AT3G48560/AT1G62180/AT1G17745/AT4G21990/AT3G58610/AT2G17630/AT4G04610/AT3G57560/AT4G29840/AT4G33510/AT4G35630/AT4G38800/AT2G37250/AT4G14880/AT4G24830/AT3G20390/AT5G22630/AT2G45440/AT3G44720/AT1G15710/AT5G56760/AT3G53580/AT1G48860/AT5G54810/AT1G75330/AT2G43750/AT3G01120/AT5G10920/AT2G27820/AT5G17920/AT1G14810/AT2G44040/AT3G59890…	86
GO:0022900	electron transport chain	57/6143	93/19652	2.18586e-09	2.69485e-07	2.34692e-07	AT1G60950/AT5G13430/AT5G13440/AT5G40810/AT5G11770/AT5G08530/AT2G02850/AT1G20340/AT5G20230/AT4G12880/AT1G72230/AT1G10960/AT3G27240/AT4G10040/AT5G67590/AT2G27510/AT1G76100/AT4G02580/AT2G02510/AT5G17770/AT5G15350/AT5G18400/AT4G31840/AT1G79010/AT1G16700/AT4G30590/AT4G27520/AT1G14450/AT2G25060/AT5G40650/AT1G22840/AT4G32210/AT1G64640/AT3G27380/AT5G25090/AT5G09600/ATMG00160/AT4G05450/AT3G01070/AT1G32550…	57
GO:0051603	proteolysis involved in protein catabolic process	27/6143	33/19652	2.89538e-09	3.1234e-07	2.72014e-07	AT3G27430/AT3G51260/AT1G56450/AT4G31300/AT3G22110/AT3G60820/AT4G14800/AT2G27020/AT1G21720/AT1G13060/AT3G14290/AT3G22630/AT5G42790/AT5G40580/AT1G79210/AT1G47250/AT2G05840/AT1G16470/AT3G26340/AT1G77440/AT5G60360/AT1G53850/AT5G66140/AT5G35590/AT5G51740/AT1G77000/AT4G32940	27
GO:0006631	fatty acid metabolic process	82/6143	152/19652	5.00913e-09	4.8032e-07	4.18306e-07	AT1G54630/AT2G43710/AT2G45970/AT2G33150/AT4G14440/AT4G00360/AT3G12120/AT1G54580/AT1G24360/AT1G65290/AT3G55360/AT1G67730/AT5G42650/AT3G05020/AT5G10480/AT2G44620/AT1G76680/AT1G63710/AT3G12800/AT4G14430/AT1G65520/AT4G30950/AT3G15850/AT1G01600/AT5G43280/AT3G15730/AT1G06350/AT3G02630/AT5G46290/AT5G16240/AT5G16340/AT4G25050/AT2G05990/AT5G48880/AT3G48460/AT2G06050/AT4G05530/AT5G35360/AT4G20870/AT1G06080…	82
GO:0009765	photosynthesis, light harvesting	20/6143	22/19652	8.86897e-09	7.65392e-07	6.66573e-07	AT2G05100/AT1G29920/AT4G10340/AT1G29930/AT2G40100/AT5G01530/AT3G54890/AT5G54270/AT1G61520/AT2G05070/AT1G15820/AT1G29910/AT2G21970/AT3G08940/AT3G61470/AT3G47470/AT1G45474/AT3G27690/AT2G34430/AT1G19150	20
GO:0015031	protein transport	259/6143	620/19652	1.31646e-08	1.03282e-06	8.99474e-07	AT5G09810/AT2G34250/AT2G03820/AT5G17190/AT2G47840/AT1G29310/AT2G30050/AT1G27310/AT1G07140/AT4G02080/AT1G56330/AT1G27970/AT1G27330/AT3G22845/AT3G09840/AT1G61570/AT4G24920/AT2G45070/AT5G24650/AT5G50460/AT1G27390/AT5G20010/AT2G37410/AT1G04070/AT1G27350/AT5G28750/AT1G10630/AT1G48440/AT3G07410/AT3G27080/AT3G03160/AT5G43970/AT5G13850/AT2G17980/AT5G45750/AT1G23490/AT1G21900/AT5G55190/AT3G20000/AT1G70490…	259
GO:0019253	reductive pentose-phosphate cycle	19/6143	21/19652	2.59015e-08	1.86275e-06	1.62225e-06	AT1G67090/AT5G38410/AT3G04790/AT3G12780/AT1G12900/AT1G56190/AT2G47400/AT3G62410/AT5G38420/AT5G38430/AT2G21170/AT1G42970/AT3G55800/AT3G26650/AT3G54050/ATCG00490/AT2G45290/AT3G60750/AT5G61410	19
GO:0009644	response to high light intensity	32/6143	45/19652	4.50725e-08	2.94874e-06	2.56803e-06	AT3G18780/AT2G05100/AT2G47450/AT2G39460/AT2G17840/AT3G55280/AT5G58070/AT2G42540/AT3G54890/AT5G54270/AT1G61520/AT2G05070/AT4G34190/AT3G61470/AT5G02120/AT3G47470/AT2G05620/AT5G61510/AT5G61230/AT1G45474/AT1G01470/AT3G28910/AT1G55480/AT1G77510/AT4G32770/AT3G47860/AT3G27690/AT4G17490/AT2G41430/AT1G32070/AT2G42080/AT4G08920	32
GO:0006833	water transport	20/6143	23/19652	4.78358e-08	2.94874e-06	2.56803e-06	AT2G36830/AT4G00430/AT3G54820/AT2G39010/AT4G35100/AT3G16240/AT2G45960/AT2G16850/AT1G01620/AT5G18290/AT4G23400/AT3G04090/AT3G61430/AT3G53420/AT3G26520/AT2G37170/AT2G37180/AT5G60660/AT4G19030/AT4G01470	20
GO:0006099	tricarboxylic acid cycle	39/6143	60/19652	7.63267e-08	4.39133e-06	3.82437e-06	AT1G04410/AT3G47520/AT1G53240/AT2G46505/AT2G20420/AT5G58330/AT1G08480/AT4G35260/AT5G08300/AT3G47833/AT3G58750/AT1G47420/AT1G10670/AT5G51040/AT1G53310/AT5G43330/AT5G03290/AT5G49460/AT2G46390/AT5G62575/AT1G65930/AT5G23250/AT5G09660/AT2G22780/AT3G15020/AT5G40650/AT4G32210/AT3G09810/AT3G27380/AT2G44350/AT4G26910/AT2G17130/AT5G09600/AT5G55070/AT1G09430/AT2G42600/AT1G60810/AT5G56720/AT2G42790	39
GO:0071456	cellular response to hypoxia	110/6143	231/19652	1.28967e-07	6.95617e-06	6.05806e-06	AT4G30440/AT5G20230/AT1G09070/AT2G22500/AT5G58070/AT3G13310/AT3G15210/AT2G36460/AT1G76680/AT1G63090/AT1G13360/AT1G72430/AT2G01150/AT1G32928/AT3G03270/AT5G13320/AT5G45630/AT1G67360/AT5G42200/AT2G26660/AT3G03670/AT3G23170/AT1G66080/AT5G35735/AT1G17290/AT3G02040/AT5G47060/AT3G56880/AT5G13190/AT5G06320/AT1G21550/AT3G04640/AT3G02550/AT2G33590/AT4G33560/AT2G41010/AT1G73500/AT1G15010/AT2G16060/AT2G47730…	110
GO:0009631	cold acclimation	35/6143	53/19652	1.97875e-07	1.00451e-05	8.74816e-06	AT1G56070/AT5G38480/AT2G15970/AT4G38680/AT4G24770/AT3G53460/AT5G67590/AT4G36020/AT2G42540/AT1G29390/AT4G13850/AT5G49510/AT5G23290/AT1G20450/AT3G14080/AT4G04800/AT1G11760/AT1G18740/AT2G24500/AT5G58220/AT3G50970/AT4G15910/AT4G29810/AT2G42530/AT2G17870/AT5G59820/AT4G31420/AT1G08780/AT1G19120/AT4G25480/AT1G29395/AT1G74960/AT1G28520/AT2G38170/AT5G66400	35
GO:0007017	microtubule-based process	22/6143	28/19652	3.4156e-07	1.63759e-05	1.42616e-05	AT5G44340/AT5G12250/AT5G62700/AT4G14960/AT5G62690/AT1G04820/AT2G29550/AT4G20890/AT5G19770/AT5G19780/AT1G50010/AT5G23860/AT1G20010/AT1G23220/AT4G15930/AT1G52245/AT1G64740/AT5G55280/AT3G16120/AT4G27360/AT3G61650/AT1G75780	22
GO:0006457	protein folding	68/6143	130/19652	4.65208e-07	2.11302e-05	1.84021e-05	AT5G42980/AT4G38740/AT3G18190/AT5G02500/AT3G55920/AT1G14980/AT4G34870/AT5G07960/AT5G56010/AT3G11830/AT3G56070/AT1G49245/AT3G44110/AT2G16600/AT2G28000/AT5G20890/AT5G02490/AT5G56030/AT3G62030/AT1G23100/AT3G09440/AT5G20720/AT5G17710/AT4G26780/AT3G60210/AT3G03960/AT5G49510/AT5G26360/AT5G56000/AT2G29960/AT4G34960/AT4G35450/AT1G76180/AT4G37910/AT5G58710/AT5G13120/AT1G24510/AT5G23290/AT2G21130/AT1G20450…	68
GO:0006096	glycolytic process	42/6143	71/19652	1.09226e-06	4.71312e-05	4.10461e-05	AT3G04120/AT1G13440/AT3G52930/AT3G55440/AT1G30120/AT2G01140/AT4G38970/AT2G36530/AT3G12780/AT5G08570/AT1G01090/AT1G79550/AT2G36460/AT4G29130/AT2G34590/AT1G20950/AT1G56190/AT1G09780/AT1G34430/AT1G59900/AT5G63680/AT3G25860/AT2G21330/AT5G56350/AT2G21170/AT3G22960/AT5G42740/AT5G50850/AT3G52990/AT1G12000/AT1G79530/AT2G19860/AT4G26530/AT3G08590/AT1G24180/AT2G36580/AT5G52920/AT1G22170/AT1G74030/AT5G47810…	42
GO:0009416	response to light stimulus	69/6143	136/19652	1.6589e-06	6.81729e-05	5.93712e-05	AT5G09810/AT2G26250/AT3G49120/AT4G38740/AT2G36530/AT2G05100/AT4G25130/AT1G79550/AT5G58070/AT1G68530/AT2G42540/AT3G49110/AT3G60530/AT2G05070/AT1G43560/AT3G62410/AT2G16280/AT4G35090/AT3G22840/AT1G42970/AT2G26640/AT4G25050/AT1G07720/AT1G26945/AT4G36240/AT4G02380/AT1G37130/AT3G51080/AT1G31580/AT2G31090/AT5G07470/AT4G14690/AT3G26650/AT2G19690/AT1G06040/AT4G01900/AT4G14110/AT3G02570/AT1G01120/AT1G55480…	69
GO:0016126	sterol biosynthetic process	27/6143	40/19652	2.61742e-06	0.000102674	8.94182e-05	AT1G11680/AT1G20050/AT1G76090/AT1G20330/AT2G34490/AT1G10030/AT1G50430/AT4G12110/AT4G37760/AT3G02580/AT4G11820/AT1G58440/AT2G17370/AT3G52940/AT4G34640/AT5G13710/AT5G24150/AT5G50375/AT5G47770/AT4G22755/AT2G38700/AT1G07420/AT4G22756/AT5G27450/AT2G34500/AT4G17190/AT3G54250	27
GO:0006629	lipid metabolic process	218/6143	541/19652	4.10229e-06	0.000153925	0.000134052	AT3G61580/AT3G47350/AT5G59500/AT1G54630/AT2G43710/AT4G39800/AT1G11910/AT1G11680/AT2G33150/AT1G20050/AT4G14440/AT1G58430/AT1G76090/AT3G12120/AT1G73650/AT2G42990/AT5G33370/AT1G54580/AT5G58070/AT3G14220/AT1G24360/AT1G65290/AT3G55360/AT1G67730/AT3G51730/AT5G42650/AT3G05020/AT5G10480/AT3G63200/AT5G55330/AT2G44620/AT2G03980/AT5G16010/AT1G76680/AT1G14290/AT1G80860/AT1G20330/AT3G12800/AT2G34490/AT4G14430…	218
GO:0010043	response to zinc ion	29/6143	45/19652	4.63477e-06	0.000166658	0.000145141	AT1G04410/AT3G55440/AT1G19570/AT1G57720/AT3G09200/AT4G31300/AT4G38220/AT1G21750/AT3G07720/AT2G30860/AT3G10920/AT2G23150/AT1G65930/AT3G14310/AT2G32520/AT1G16470/AT4G35040/AT5G17920/AT2G16770/AT5G03630/AT1G52760/AT3G02570/AT4G39260/AT5G35590/AT2G46800/AT4G31510/AT5G01600/AT1G67070/AT5G21940	29
GO:0008202	steroid metabolic process	23/6143	33/19652	6.35755e-06	0.000219463	0.000191128	AT1G11680/AT1G20050/AT4G24220/AT1G76090/AT1G20330/AT2G34490/AT1G10030/AT1G50430/AT4G12110/AT3G02580/AT4G11820/AT2G38050/AT3G52940/AT5G13710/AT5G47770/AT4G22755/AT2G38700/AT1G07420/AT4G22756/AT5G27450/AT2G34500/AT4G17190/AT3G54250	23
GO:0006979	response to oxidative stress	118/6143	268/19652	6.63067e-06	0.000220087	0.000191672	AT2G28190/AT3G49120/AT5G13930/AT3G04120/AT4G11290/AT1G07890/AT4G34710/AT1G08830/AT1G75280/AT4G11600/AT1G44970/AT1G27330/AT5G01410/AT2G39460/AT5G20230/AT1G27350/AT3G55280/AT5G26030/AT3G49110/AT1G78380/AT5G19880/AT4G04830/AT5G58400/AT3G62030/AT4G21860/AT2G37040/AT5G01820/AT5G54500/AT3G06050/AT4G35090/AT3G60980/AT4G20830/AT3G53260/AT4G21960/AT2G40880/AT5G24770/AT5G40150/AT3G53990/AT3G14430/AT1G71695…	118
GO:0042761	very long-chain fatty acid biosynthetic process	15/6143	18/19652	7.60533e-06	0.000243089	0.000211704	AT5G47120/AT1G67730/AT5G10480/AT4G24510/AT1G43580/AT2G32720/AT1G06080/AT2G31360/AT3G28910/AT1G01120/AT4G36830/AT1G13580/AT3G23840/AT3G25540/AT3G06470	15
GO:0016192	vesicle-mediated transport	109/6143	245/19652	8.33341e-06	0.00025494	0.000222025	AT5G17190/AT1G04260/AT3G56110/AT2G30050/AT4G02080/AT1G56330/AT2G40380/AT3G22845/AT3G13720/AT2G38360/AT3G15480/AT1G10630/AT1G48440/AT3G03160/AT2G17980/AT1G23490/AT1G21900/AT1G70490/AT1G02130/AT1G47830/AT1G57620/AT1G08770/AT1G29330/AT3G17780/AT3G01340/AT3G07680/AT3G62560/AT1G04750/AT3G25040/AT5G54750/AT3G11730/AT1G30630/AT5G42570/AT2G47170/AT4G08520/AT3G12180/AT2G44610/AT1G14010/AT5G47200/AT4G14455…	109
GO:0009768	photosynthesis, light harvesting in photosystem I	10/6143	10/19652	8.86236e-06	0.00025494	0.000222025	AT2G05100/AT3G54890/AT1G61520/AT2G05070/AT1G08380/AT3G61470/AT3G47470/AT1G45474/AT3G27690/AT1G19150	10
GO:0045039	protein insertion into mitochondrial inner membrane	10/6143	10/19652	8.86236e-06	0.00025494	0.000222025	AT5G24650/AT2G37410/AT2G42210/AT3G25120/AT3G10110/AT5G55510/AT4G26670/AT3G49560/AT2G29530/AT3G62880	10
GO:0006511	ubiquitin-dependent protein catabolic process	72/6143	150/19652	1.27018e-05	0.000353601	0.000307948	AT1G75950/AT4G05050/AT2G47110/AT3G51260/AT5G42190/AT4G05320/AT2G25490/AT5G41700/AT3G22110/AT4G02890/AT5G53300/AT1G10230/AT5G20570/AT2G27020/AT3G55380/AT5G20620/AT2G35635/AT3G14290/AT1G76920/AT4G38630/AT5G42790/AT1G64230/AT1G14400/AT2G47970/AT1G20140/AT5G03240/AT4G17510/AT1G79210/AT1G47250/AT3G63000/AT2G05840/AT5G50870/AT1G16470/AT2G23780/AT5G59300/AT1G16890/AT1G66620/AT3G58030/AT1G53850/AT3G08690…	72
GO:0015986	proton motive force-driven ATP synthesis	23/6143	35/19652	2.83873e-05	0.00076557	0.000666728	AT4G09650/AT5G47030/AT5G08690/AT2G33040/AT1G51650/AT1G78900/AT4G00895/AT5G13450/AT4G29480/AT4G04640/AT3G52300/AT2G19680/AT4G26210/AT5G08670/AT3G01390/ATCG00470/ATMG01170/AT4G32260/AT5G08680/ATCG00140/ATCG00150/ATCG00480/ATMG00040	23
GO:0006413	translational initiation	52/6143	105/19652	6.95085e-05	0.00177205	0.00154326	AT3G13920/AT1G26630/AT5G54760/AT3G55620/AT4G33250/AT1G04170/AT1G54270/AT1G72730/AT5G44320/AT1G69410/AT4G11175/AT2G39990/AT5G35680/AT4G09800/AT1G22780/AT1G77840/AT3G11400/AT2G04520/AT5G18110/AT1G34030/AT1G75510/AT2G46280/AT5G11900/AT5G20920/AT5G35620/AT4G18040/AT3G57290/AT1G10840/AT4G27130/AT2G34970/AT5G37475/AT2G36885/AT4G20980/AT1G54290/AT2G46290/AT3G02200/AT1G72340/AT4G34110/AT2G40780/AT5G25757…	52
GO:0010205	photoinhibition	10/6143	11/19652	6.98142e-05	0.00177205	0.00154326	AT5G66570/AT1G67740/AT4G04020/AT4G30950/AT3G15850/AT3G50820/AT1G77510/AT2G30950/AT5G42270/AT5G57050	10
GO:0002183	cytoplasmic translational initiation	16/6143	22/19652	7.66625e-05	0.00189028	0.00164623	AT3G13920/AT4G33250/AT5G44320/AT2G39990/AT3G11400/AT2G46280/AT3G57290/AT1G10840/AT5G37475/AT4G20980/AT2G46290/AT3G02200/AT5G25757/AT1G66070/AT5G25754/AT5G06000	16
GO:0009744	response to sucrose	38/6143	72/19652	0.000117722	0.00282205	0.0024577	AT3G04120/AT1G69780/AT1G20950/AT2G47400/AT4G17670/AT2G39990/AT4G34590/AT3G62410/AT4G38630/AT5G42890/AT5G20700/AT5G20270/AT1G42970/AT1G20840/AT5G41670/AT4G37680/AT2G24150/AT5G47060/AT5G61230/AT1G22160/AT3G26650/AT1G10840/AT4G01900/AT4G38320/AT1G74670/AT1G77120/AT5G65420/AT2G28900/AT3G12700/AT5G20830/AT5G47390/AT1G67070/AT3G22550/AT1G62480/AT5G08790/AT1G16880/AT3G63210/AT1G53885	38
GO:0000413	protein peptidyl-prolyl isomerization	21/6143	33/19652	0.000127067	0.00296376	0.00258111	AT4G38740/AT3G55920/AT4G34870/AT3G25220/AT5G48580/AT3G56070/AT2G16600/AT3G62030/AT2G29960/AT4G34960/AT5G58710/AT5G13120/AT2G21130/AT5G35100/AT1G74070/AT2G38730/AT2G47320/AT2G36130/AT1G26940/AT1G01940/AT4G17070	21
GO:0015995	chlorophyll biosynthetic process	25/6143	42/19652	0.000142152	0.00314668	0.00274042	AT1G69740/AT5G18660/AT5G16440/AT1G74470/AT3G02780/AT3G48730/AT5G58250/AT1G10670/AT5G45930/AT2G40490/AT1G03475/AT1G63970/AT3G21200/AT1G58290/AT5G63570/AT3G56940/AT4G25080/AT4G18480/AT1G03630/AT4G01690/AT3G14110/AT5G08280/AT3G21500/AT1G78600/AT3G51820	25
GO:0043085	positive regulation of catalytic activity	12/6143	15/19652	0.000142202	0.00314668	0.00274042	AT2G31440/AT4G03520/AT1G03680/AT3G15360/AT1G43560/AT3G02730/AT2G34470/AT1G50320/AT5G16400/AT3G51030/AT1G76760/AT2G15570	12
GO:0071806	protein transmembrane transport	14/6143	19/19652	0.000176353	0.00375943	0.00327406	AT4G24920/AT5G50460/AT1G27390/AT1G04070/AT3G27080/AT5G43970/AT1G17530/AT3G48570/AT4G14870/AT5G05000/AT4G38490/AT5G40930/AT2G01110/AT1G02280	14
GO:0006098	pentose-phosphate shunt	16/6143	23/19652	0.000178606	0.00375943	0.00327406	AT1G71100/AT1G64190/AT3G04790/AT2G01290/AT3G02360/AT5G13420/AT3G49360/AT5G41670/AT5G24400/AT1G63290/AT1G12230/AT3G27300/AT5G13110/AT3G01850/AT5G24420/AT5G61410	16
GO:0006949	syncytium formation	9/6143	10/19652	0.000204039	0.00409502	0.00356632	AT2G28950/AT4G28250/AT1G69530/AT2G03090/AT2G40610/AT2G39700/AT2G37640/AT1G26770/AT3G55500	9
GO:0009645	response to low light intensity stimulus	9/6143	10/19652	0.000204039	0.00409502	0.00356632	AT2G05100/AT3G54890/AT1G61520/AT2G05070/AT3G61470/AT3G47470/AT1G45474/AT2G06850/AT3G27690	9
GO:0006353	DNA-templated transcription termination	24/6143	41/19652	0.000275352	0.00540066	0.00470338	AT1G61980/AT4G38160/AT4G02990/AT3G46950/AT1G61990/AT1G06190/AT5G64950/AT1G61960/AT1G62150/AT1G62010/AT1G62110/AT5G07900/AT2G44020/AT1G62085/AT2G03050/AT3G18870/AT2G22370/AT1G74120/AT2G34620/AT5G54180/AT5G23930/AT5G06810/AT5G55580/AT1G62120	24
GO:0000387	spliceosomal snRNP assembly	11/6143	14/19652	0.000367583	0.00704942	0.00613928	AT1G76300/AT4G30220/AT2G18740/AT1G20580/AT4G02840/AT3G11500/AT5G62290/AT2G23930/AT4G30330/AT3G07590/AT4G03120	11
GO:0045454	cell redox homeostasis	16/6143	24/19652	0.000380209	0.00712223	0.00620269	AT3G26060/AT1G67740/AT2G17420/AT3G14395/AT3G02730/AT3G11630/AT4G35090/AT5G16400/AT1G76080/AT3G06730/AT5G15230/AT5G10860/AT2G15570/AT3G24170/AT5G06290/AT4G34120	16
GO:0001732	formation of cytoplasmic translation initiation complex	15/6143	22/19652	0.000403221	0.00712223	0.00620269	AT4G33250/AT5G44320/AT2G39990/AT3G11400/AT2G46280/AT3G57290/AT1G10840/AT5G37475/AT4G20980/AT2G46290/AT3G02200/AT5G25757/AT1G66070/AT5G25754/AT5G06000	15
GO:0006754	ATP biosynthetic process	15/6143	22/19652	0.000403221	0.00712223	0.00620269	AT4G09650/AT5G47030/AT5G08690/AT2G33040/AT1G51650/AT4G00895/AT5G13450/AT4G04640/AT5G08670/ATCG00470/ATMG01170/AT5G08680/ATCG00140/ATCG00150/ATCG00480	15
GO:0009733	response to auxin	114/6143	279/19652	0.000404391	0.00712223	0.00620269	AT1G75950/AT5G09810/AT5G13930/AT5G40770/AT2G41800/AT5G42190/AT1G04250/AT4G38860/AT5G18030/AT5G37770/AT4G38840/AT1G10230/AT1G29510/AT1G19840/AT5G20570/AT3G23050/AT3G01130/AT1G75580/AT1G64520/AT2G22670/AT4G36800/AT1G22920/AT5G65670/AT5G08640/AT1G72430/AT4G29080/AT5G54500/AT1G77690/AT4G32460/AT4G38630/AT2G22240/AT1G75590/AT1G71090/AT4G34760/AT3G55120/AT4G13520/AT1G29500/AT4G12410/AT5G53590/AT4G34750…	114
GO:0009767	photosynthetic electron transport chain	14/6143	20/19652	0.000418284	0.00721959	0.00628748	AT1G60950/AT4G03280/AT1G08380/AT3G21200/AT5G66190/ATCG00280/AT3G01440/AT4G33520/AT1G14150/ATCG00680/AT4G23890/ATCG00540/ATCG00730/ATCG00580	14
GO:0009414	response to water deprivation	132/6143	330/19652	0.000432824	0.00732406	0.00637846	AT5G59310/AT4G24960/AT1G05850/AT4G39730/AT5G59320/AT2G38530/AT3G46320/AT4G00430/AT3G45930/AT1G15690/AT4G38680/AT3G52150/AT5G47120/AT1G69700/AT5G59690/AT1G52400/AT2G17840/AT3G53730/AT4G36020/AT5G58070/AT5G65020/AT2G42540/AT2G45960/AT5G13780/AT3G18490/AT3G23050/AT1G35720/AT2G16600/AT5G48870/AT3G12630/AT5G59970/AT5G67300/AT1G01620/AT5G15970/AT5G56030/AT1G07820/AT5G01820/AT4G13850/AT2G38750/AT2G28740…	132
GO:0006888	endoplasmic reticulum to Golgi vesicle-mediated transport	31/6143	59/19652	0.000538115	0.00893065	0.00777762	AT5G17190/AT1G56330/AT2G36300/AT1G48440/AT3G03160/AT1G02130/AT3G59500/AT3G52760/AT3G17780/AT3G11730/AT5G42570/AT1G30890/AT4G30260/AT1G80500/AT4G14455/AT2G20930/AT5G02280/AT5G58060/AT2G18840/AT5G48660/AT3G52190/AT1G11905/AT4G17170/AT3G24350/AT5G01430/AT1G11890/AT1G05785/AT3G07190/AT1G51160/AT5G43670/AT3G03180	31
GO:0046686	response to cadmium ion	32/6143	62/19652	0.000663614	0.0108056	0.00941054	AT1G13440/AT3G09200/AT1G48030/AT4G02930/AT5G35630/AT1G75040/AT1G44810/AT4G14800/AT5G26220/AT4G23670/AT1G59900/AT2G30860/AT1G68560/AT4G14880/AT1G17290/AT4G14030/AT5G11200/AT1G23190/AT1G52760/AT3G02570/ATCG00490/AT3G22890/AT5G24890/AT3G56240/AT4G31510/AT1G67070/AT5G11170/AT1G36370/AT1G74910/AT5G64250/AT4G04460/AT1G02930	32
GO:0006694	steroid biosynthetic process	24/6143	43/19652	0.000723039	0.0115552	0.0100634	AT3G47350/AT1G11680/AT1G20050/AT1G76090/AT1G20330/AT2G34490/AT1G10030/AT1G50430/AT4G12110/AT3G02580/AT4G11820/AT2G38050/AT3G52940/AT2G33630/AT5G13710/AT5G47770/AT4G22755/AT2G38700/AT1G07420/AT4G22756/AT5G27450/AT2G34500/AT4G17190/AT3G54250	24
GO:0007010	cytoskeleton organization	23/6143	41/19652	0.000844455	0.0132092	0.0115038	AT5G44340/AT5G09810/AT5G12250/AT5G62700/AT4G14960/AT5G62690/AT3G18780/AT1G04820/AT2G29550/AT4G20890/AT5G19770/AT5G19780/AT4G34490/AT3G53750/AT1G50010/AT5G23860/AT3G60830/AT2G37620/AT1G20010/AT3G12110/AT1G64740/AT1G75780/AT5G59370	23
GO:0009873	ethylene-activated signaling pathway	77/6143	181/19652	0.000857142	0.0132092	0.0115038	AT1G75950/AT1G05850/AT5G38480/AT1G01250/AT5G42190/AT2G25490/AT2G46310/AT3G15210/AT1G53910/AT5G50080/AT3G61630/AT2G23340/AT1G72430/AT3G15730/AT3G46060/AT2G44940/AT1G25490/AT5G67190/AT3G25890/AT1G53170/AT1G71130/AT3G16770/AT4G11140/AT1G12890/AT1G77200/AT1G22190/AT1G74930/AT4G27950/AT5G44210/AT1G73500/AT1G68550/AT5G25350/AT4G36900/AT3G16280/AT3G52430/AT5G11590/AT5G47230/AT4G39780/AT3G60490/AT4G16750…	77
GO:0006465	signal peptide processing	13/6143	19/19652	0.000951205	0.0142018	0.0123682	AT2G22425/AT1G52600/AT4G40042/AT2G39960/AT5G27430/AT1G53530/AT3G05230/AT1G06200/AT3G15710/AT3G24590/AT1G34640/AT2G31140/AT1G29960	13
GO:0006164	purine nucleotide biosynthetic process	12/6143	17/19652	0.000986976	0.0142018	0.0123682	AT3G57610/AT4G34740/AT2G16570/AT1G09830/AT1G16350/AT3G55010/AT1G63660/AT1G79470/AT4G18440/AT1G74260/AT2G35040/AT2G37690	12
GO:0000290	deadenylation-dependent decapping of nuclear-transcribed mRNA	11/6143	15/19652	0.000987379	0.0142018	0.0123682	AT5G48870/AT2G43810/AT2G03870/AT1G76860/AT1G03330/AT1G21190/AT3G14080/AT3G59810/AT5G27720/AT1G19120/AT3G22270	11
GO:0035999	tetrahydrofolate interconversion	11/6143	15/19652	0.000987379	0.0142018	0.0123682	AT4G13930/AT2G44160/AT4G32520/AT1G50480/AT4G00620/AT3G12290/AT3G59970/AT4G37930/AT1G36370/AT2G20830/AT1G22020	11
GO:0034599	cellular response to oxidative stress	20/6143	36/19652	0.00213274	0.0292854	0.0255044	AT2G28190/AT3G52960/AT1G07890/AT1G08830/AT1G65980/AT3G26060/AT4G25130/AT5G40370/AT3G06050/AT2G20270/AT4G04800/AT4G35000/AT1G65970/AT5G57345/AT5G07460/AT4G35970/AT2G41090/AT1G31170/AT4G08390/AT1G60740	20
GO:0008295	spermidine biosynthetic process	8/6143	10/19652	0.00213787	0.0292854	0.0255044	AT4G34710/AT5G53120/AT1G23820/AT2G16500/AT3G02470/AT1G70310/AT5G18930/AT5G15950	8
GO:0110102	ribulose bisphosphate carboxylase complex assembly	8/6143	10/19652	0.00213787	0.0292854	0.0255044	AT1G67090/AT5G38410/AT5G51110/AT3G47650/AT3G56910/AT5G28500/AT5G19855/AT3G04550	8
GO:0006865	amino acid transport	31/6143	63/19652	0.00218241	0.0294285	0.025629	AT1G17120/AT1G58360/AT2G21050/AT1G80510/AT1G77690/AT5G65990/AT1G47670/AT5G63850/AT5G57685/AT2G24762/AT2G39890/AT4G25760/AT3G55740/AT3G30390/AT5G15240/AT1G25530/AT4G31730/AT2G38120/AT3G56200/AT2G42005/AT1G44800/AT3G11900/AT5G49630/AT2G01170/AT2G34960/AT5G40780/AT5G01240/AT1G44100/AT1G67640/AT1G10010/AT5G09220	31
GO:0009269	response to desiccation	11/6143	16/19652	0.00226614	0.029852	0.0259978	AT2G05100/AT4G38680/AT2G44060/AT3G44380/AT2G05070/AT1G76180/AT2G46140/AT1G01470/AT1G44170/AT3G27690/AT1G05260	11
GO:0071370	cellular response to gibberellin stimulus	9/6143	12/19652	0.0023311	0.029852	0.0259978	AT5G49510/AT5G23290/AT1G29990/AT3G22480/AT1G12080/AT1G08780/AT1G62480/AT2G07340/AT1G62660	9
GO:0006596	polyamine biosynthetic process	10/6143	14/19652	0.00235218	0.029852	0.0259978	AT4G34710/AT5G53120/AT1G23820/AT2G16500/AT3G02470/AT1G70310/AT5G08170/AT5G18930/AT5G15950/AT2G27450	10
GO:0006626	protein targeting to mitochondrion	10/6143	14/19652	0.00235218	0.029852	0.0259978	AT1G27390/AT1G04070/AT3G27080/AT5G43970/AT1G17530/AT3G20000/AT1G13900/AT5G40930/AT5G23395/AT2G19080	10
GO:0019752	carboxylic acid metabolic process	19/6143	34/19652	0.00250167	0.031289	0.0272493	AT1G04410/AT1G53240/AT2G02010/AT5G58330/AT4G35260/AT4G17260/AT1G65960/AT5G43330/AT5G03290/AT1G43710/AT1G65930/AT5G09660/AT2G22780/AT3G15020/AT3G09810/AT2G17130/AT5G17330/AT2G20340/AT5G56720	19
GO:0042538	hyperosmotic salinity response	25/6143	49/19652	0.00305904	0.0377136	0.0328445	AT4G24960/AT5G01410/AT1G69700/AT5G58070/AT5G49480/AT1G16920/AT4G30996/AT3G18030/AT3G04290/AT2G41130/AT3G14080/AT5G52310/AT1G74520/AT3G05880/AT2G37570/AT4G30960/AT5G65010/AT5G59820/AT5G62490/AT1G05260/AT1G19120/AT5G50720/AT5G46830/AT3G19580/AT2G42080	25
GO:0019684	photosynthesis, light reaction	13/6143	21/19652	0.00364261	0.0442757	0.0385593	AT5G66570/AT1G06680/AT3G50820/ATCG00220/ATCG00020/ATCG00280/AT3G01440/ATCG00420/ATCG00680/ATCG01070/ATCG00270/AT3G61320/ATCG00580	13
GO:1902600	proton transmembrane transport	59/6143	140/19652	0.00414922	0.0484934	0.0422325	AT3G58730/AT4G38920/AT4G09650/AT4G34720/AT1G75630/AT5G47030/AT2G16510/AT5G13430/AT5G08690/AT5G13440/AT2G33040/AT1G15690/AT1G51650/AT3G18830/AT1G78900/AT3G54110/AT1G19910/AT2G22500/AT4G00895/AT3G42050/AT1G12840/AT5G13450/AT4G02620/AT2G25610/AT4G29480/AT4G04640/AT3G52300/AT4G26710/AT4G11150/AT2G19680/AT2G21870/AT4G26210/AT2G20780/AT3G28710/AT5G55290/AT5G08670/AT4G36670/AT3G01390/AT3G28715/AT4G23710…	59
GO:0009073	aromatic amino acid family biosynthetic process	21/6143	40/19652	0.00415819	0.0484934	0.0422325	AT1G22410/AT1G75500/AT4G33510/AT5G22630/AT3G44720/AT1G15710/AT1G48860/AT5G54810/AT2G27820/AT2G45300/AT3G54640/AT2G04400/AT1G25220/AT4G39980/AT5G66120/AT5G10870/AT5G05590/AT5G34930/AT4G27070/AT3G29200/AT4G02610	21
GO:0043161	proteasome-mediated ubiquitin-dependent protein catabolic process	21/6143	40/19652	0.00415819	0.0484934	0.0422325	AT5G38470/AT4G29040/AT1G21720/AT1G64520/AT3G14290/AT4G22820/AT4G38630/AT2G47970/AT3G53970/AT4G37880/AT3G63000/AT5G50870/AT1G77440/AT1G53850/AT4G19700/AT1G23390/AT5G45100/AT2G37680/AT1G51710/AT5G09630/AT3G12920	21

## Sheet: PIF4ox UP
ID	Description	GeneRatio	BgRatio	pvalue	p.adjust	qvalue	geneID	Count
GO:0016310	phosphorylation	611/6049	1279/19652	1.17506e-39	1.02113e-36	7.96567e-37	AT5G35170/AT3G63340/AT2G37840/AT4G30310/AT4G03230/AT4G24740/AT5G64070/AT1G18160/AT4G32660/AT1G53440/AT1G65950/AT4G12020/AT5G04510/AT1G26150/AT4G24450/AT4G33080/AT4G04740/AT1G21590/AT3G59410/AT4G08470/AT3G22420/AT5G14720/AT5G51290/AT1G73660/AT1G29750/AT1G22870/AT1G53510/AT5G63930/AT1G13350/AT2G42640/AT5G11400/AT3G48190/AT5G09350/AT4G02260/AT3G06620/AT5G01950/AT3G04810/AT1G07650/AT3G51630/AT1G49180…	611
GO:0006468	protein phosphorylation	477/6049	998/19652	5.97654e-31	2.59681e-28	2.02573e-28	AT3G63340/AT2G37840/AT4G03230/AT4G24740/AT2G42330/AT1G18160/AT4G32660/AT1G53440/AT1G65950/AT4G12020/AT5G04510/AT1G26150/AT4G33080/AT4G04740/AT1G21590/AT3G59410/AT4G08470/AT3G22420/AT5G14720/AT1G73660/AT1G29750/AT1G22870/AT1G53510/AT5G63930/AT1G13350/AT2G42640/AT5G11400/AT3G06620/AT5G01950/AT3G04810/AT1G07650/AT3G51630/AT1G49180/AT1G03930/AT3G53570/AT1G53430/AT4G38230/AT4G24810/AT1G67580/AT1G49730…	477
GO:0006281	DNA repair	167/6049	257/19652	7.39969e-30	2.14344e-27	1.67207e-27	AT5G44750/AT1G66730/AT1G79950/AT4G02460/AT3G57300/AT2G31970/AT3G61420/AT1G48360/AT5G01630/AT5G41370/AT3G28030/AT5G61460/AT3G10010/AT1G19100/AT5G24280/AT5G07660/AT5G63920/AT3G48190/AT1G67500/AT1G80810/AT1G76710/AT1G08840/AT1G52500/AT1G31360/AT1G55750/AT5G22750/AT2G18760/AT5G01780/AT1G29630/AT4G02070/AT4G00020/AT1G05900/AT1G07745/AT3G20540/AT1G77620/AT1G80420/AT5G15920/AT2G27170/AT5G46210/AT5G52910…	167
GO:0006974	cellular response to DNA damage stimulus	148/6049	218/19652	1.07066e-29	2.326e-27	1.81448e-27	AT5G44750/AT1G66730/AT1G79950/AT4G02460/AT3G57300/AT2G31970/AT3G61420/AT1G48360/AT5G01630/AT5G41370/AT3G28030/AT5G61460/AT1G19100/AT5G24280/AT2G32700/AT5G07660/AT3G48190/AT1G67500/AT1G80810/AT1G08840/AT1G52500/AT1G55750/AT5G22750/AT2G18760/AT5G01780/AT1G29630/AT4G02070/AT1G77320/AT4G00020/AT1G05900/AT1G07745/AT3G20540/AT1G77620/AT1G80420/AT5G15920/AT2G27170/AT5G57160/AT5G22010/AT3G54670/AT5G16630…	148
GO:0006338	chromatin remodeling	106/6049	141/19652	1.71621e-27	2.98278e-25	2.32682e-25	AT5G42400/AT5G43990/AT3G48710/AT3G57300/AT1G50410/AT4G27910/AT1G63490/AT3G18520/AT2G23380/AT1G79350/AT2G40770/AT2G36740/AT1G76710/AT1G55970/AT2G31650/AT5G22750/AT2G18760/AT4G21430/AT5G51230/AT4G00990/AT2G25170/AT3G07740/AT2G23740/AT1G26330/AT3G61740/AT3G12810/AT4G30860/AT4G16845/AT3G20010/AT3G12980/AT5G19310/AT2G13370/AT1G79000/AT5G18190/AT1G16710/AT5G66750/AT1G56460/AT5G53430/AT1G48310/AT4G02020…	106
GO:0007018	microtubule-based movement	60/6049	63/19652	2.19408e-27	3.17776e-25	2.47893e-25	AT4G38950/AT5G27950/AT3G51150/AT3G50240/AT5G66310/AT3G45850/AT2G37420/AT5G06670/AT4G39050/AT3G20150/AT1G21730/AT1G20060/AT5G65460/AT2G21380/AT1G12430/AT3G12020/AT1G72250/AT5G65930/AT1G01950/AT5G47820/AT3G44050/AT3G10310/AT5G54670/AT3G17360/AT2G28620/AT3G10180/AT2G47500/AT2G22610/AT3G63480/AT3G19050/AT5G60930/AT3G43210/AT4G27180/AT2G36200/AT4G21270/AT5G27550/AT3G16630/AT5G10470/AT5G23910/AT3G23670…	60
GO:0006325	chromatin organization	129/6049	194/19652	9.35371e-25	1.1612e-22	9.05833e-23	AT5G43990/AT3G48710/AT1G05830/AT1G50410/AT4G27910/AT1G19100/AT3G18520/AT1G55250/AT2G23380/AT2G43650/AT1G21610/AT1G76710/AT2G31650/AT5G22750/AT5G51230/AT2G25170/AT2G23740/AT5G11470/AT3G61740/AT3G12810/AT4G30860/AT3G20010/AT3G12980/AT2G44950/AT4G32820/AT5G19310/AT2G13370/AT3G24010/AT1G79000/AT4G19020/AT1G16710/AT5G53430/AT5G55390/AT4G02020/AT4G24970/AT4G15180/AT1G08600/AT3G54610/AT5G63550/AT5G09740…	129
GO:0007049	cell cycle	160/6049	282/19652	9.61151e-20	1.04405e-17	8.14449e-18	AT4G33260/AT5G13840/AT4G33270/AT2G31970/AT4G26760/AT5G01630/AT5G48600/AT1G03780/AT5G62410/AT1G80810/AT4G32700/AT3G47460/AT5G15540/AT4G00020/AT2G39090/AT3G07980/AT2G27170/AT2G20000/AT5G22110/AT2G07690/AT3G54670/AT3G43210/AT1G77600/AT3G02680/AT5G47690/AT3G16320/AT5G44635/AT5G45190/AT4G31880/AT5G27620/AT5G49880/AT2G32900/AT1G61000/AT2G14120/AT4G30870/AT1G61030/AT4G21270/AT1G14350/AT2G04660/AT5G46280…	160
GO:0006397	mRNA processing	180/6049	333/19652	5.48749e-19	5.29847e-17	4.13327e-17	AT5G09880/AT3G19670/AT4G24740/AT2G42330/AT3G54230/AT3G04160/AT2G02570/AT3G50670/AT4G36690/AT1G15200/AT5G08230/AT5G64390/AT3G19840/AT1G09140/AT4G29750/AT5G37370/AT1G60200/AT2G25850/AT3G62310/AT2G42270/AT2G35340/AT5G61140/AT1G55310/AT5G14580/AT5G46400/AT3G63070/AT1G60900/AT3G01370/AT5G16180/AT5G65180/AT1G04080/AT5G10800/AT3G17040/AT2G48120/AT1G15280/AT1G14640/AT4G22350/AT2G47250/AT5G58040/AT5G63370…	180
GO:0051321	meiotic cell cycle	63/6049	82/19652	1.01868e-17	8.85229e-16	6.90555e-16	AT2G31970/AT5G23610/AT5G01630/AT5G48600/AT5G62410/AT5G63920/AT3G43610/AT3G47460/AT5G19400/AT5G15540/AT4G00020/AT2G27170/AT1G53490/AT5G63370/AT5G22010/AT3G54670/AT2G46980/AT4G30870/AT1G61030/AT5G54260/AT4G21270/AT4G22970/AT3G09660/AT1G11060/AT3G20475/AT1G35530/AT1G08620/AT1G20570/AT5G40820/AT1G22275/AT2G14050/AT5G57880/AT1G22260/AT5G61960/AT3G27730/AT5G02520/AT1G34355/AT5G07290/AT2G21800/AT2G42890…	63
GO:0051301	cell division	156/6049	287/19652	6.24911e-17	4.9368e-15	3.85113e-15	AT4G33260/AT5G13840/AT4G33270/AT4G26760/AT5G48600/AT4G37750/AT1G03780/AT5G62410/AT1G78580/AT1G80810/AT2G25170/AT4G32700/AT3G47460/AT5G15540/AT2G39090/AT3G07980/AT2G27170/AT2G44950/AT2G28350/AT2G20000/AT1G17580/AT3G54670/AT3G43210/AT1G77600/AT5G47690/AT3G16320/AT3G20550/AT5G45190/AT4G31880/AT5G27620/AT5G49880/AT2G32900/AT1G61000/AT1G54490/AT2G14120/AT4G30870/AT1G61030/AT2G26890/AT5G20490/AT4G21270…	156
GO:0006364	rRNA processing	93/6049	149/19652	1.39607e-15	9.39488e-14	7.32882e-14	AT1G01040/AT2G48100/AT5G66540/AT5G08420/AT3G01540/AT2G43650/AT1G10490/AT1G17690/AT4G02400/AT5G26180/AT5G14580/AT2G40360/AT5G38720/AT1G76050/AT3G06530/AT5G02250/AT5G59980/AT3G11964/AT2G40430/AT4G26600/AT5G42540/AT5G48240/AT4G14510/AT5G55920/AT5G18570/AT1G06560/AT3G57940/AT1G66260/AT2G17510/AT3G15080/AT4G04940/AT1G31970/AT3G01160/AT5G08600/AT5G63420/AT3G18610/AT5G40530/AT5G35910/AT2G17250/AT2G39140…	93
GO:0006310	DNA recombination	62/6049	85/19652	1.40545e-15	9.39488e-14	7.32882e-14	AT1G66730/AT1G79950/AT4G02460/AT5G01630/AT5G61460/AT5G07660/AT1G80810/AT4G25120/AT1G31360/AT5G22750/AT4G35740/AT4G00020/AT1G07745/AT5G15920/AT1G53490/AT5G57160/AT5G22010/AT1G48050/AT3G05210/AT1G77600/AT5G47690/AT4G31880/AT5G41150/AT1G80210/AT5G63950/AT4G30870/AT1G65470/AT1G08130/AT5G27680/AT1G15940/AT1G16970/AT4G21070/AT3G32920/AT1G35530/AT5G64630/AT1G27880/AT5G57880/AT3G27120/AT3G05740/AT1G10930…	62
GO:0031047	RNA-mediated gene silencing	60/6049	84/19652	1.95939e-14	1.21622e-12	9.48759e-13	AT5G43990/AT1G01040/AT3G03300/AT1G50410/AT1G19100/AT5G20320/AT5G21150/AT3G20010/AT5G23570/AT1G48410/AT3G12550/AT1G13790/AT3G20550/AT2G19930/AT4G24970/AT1G17760/AT2G13540/AT1G54440/AT3G43920/AT2G19910/AT2G27040/AT5G43810/AT5G59390/AT5G09860/AT5G23080/AT1G04050/AT4G36290/AT3G15390/AT1G80790/AT2G32940/AT2G19920/AT3G49500/AT5G35910/AT4G00380/AT2G27880/AT1G15910/AT2G27100/AT4G36280/AT3G48670/AT5G13010…	60
GO:0032508	DNA duplex unwinding	33/6049	40/19652	1.92593e-11	1.11576e-09	8.70385e-10	AT1G79950/AT5G41370/AT1G20720/AT5G08110/AT1G08840/AT4G25120/AT1G31360/AT4G35740/AT2G07690/AT1G48050/AT5G66750/AT5G44635/AT5G46280/AT5G27680/AT3G09660/AT1G06670/AT1G16970/AT1G35530/AT4G14790/AT1G03190/AT2G14050/AT1G79890/AT2G16440/AT3G27730/AT5G41360/AT3G23700/AT1G10930/AT1G30680/AT1G44900/AT2G01440/AT2G44980/AT1G30660/AT4G02060	33
GO:0008380	RNA splicing	109/6049	206/19652	2.71521e-11	1.4747e-09	1.15039e-09	AT3G19670/AT2G42330/AT3G63400/AT3G54230/AT3G04160/AT3G50670/AT4G36690/AT1G15200/AT3G19840/AT1G09140/AT4G29750/AT5G37370/AT1G60200/AT3G62310/AT2G42270/AT2G39340/AT2G35340/AT5G61140/AT5G04810/AT1G55310/AT5G46400/AT3G25840/AT1G60900/AT3G01370/AT5G16180/AT1G04080/AT5G10800/AT1G15280/AT1G14640/AT2G47250/AT5G63370/AT1G44910/AT3G52120/AT2G29210/AT1G32490/AT1G09230/AT2G20020/AT2G16860/AT1G03910/AT2G43370…	109
GO:0008033	tRNA processing	56/6049	89/19652	3.82821e-10	1.95689e-08	1.52654e-08	AT5G24670/AT1G10490/AT1G72560/AT1G76170/AT5G14580/AT2G32320/AT3G63510/AT5G47970/AT5G59980/AT4G27340/AT3G24560/AT1G78010/AT3G16260/AT1G68720/AT1G07910/AT4G40000/AT3G55160/AT3G49640/AT2G27760/AT1G34150/AT2G13440/AT2G31580/AT4G38890/AT2G22400/AT3G57940/AT4G04670/AT2G45270/AT2G04530/AT5G60430/AT3G02370/AT4G01880/AT3G56120/AT2G47300/AT1G51310/AT3G11220/AT1G49540/AT5G13680/AT2G43190/AT3G03710/AT2G32230…	56
GO:0006260	DNA replication	60/6049	98/19652	4.50159e-10	2.17327e-08	1.69533e-08	AT1G66730/AT1G79950/AT5G63960/AT4G24790/AT1G67500/AT1G08840/AT1G31360/AT4G32700/AT3G20540/AT1G78650/AT5G57160/AT5G22110/AT5G22010/AT2G07690/AT5G44740/AT5G44635/AT1G79150/AT1G08260/AT5G55300/AT5G46280/AT5G67100/AT1G19080/AT1G65470/AT1G08130/AT4G18820/AT1G50840/AT5G16690/AT2G02480/AT2G20980/AT1G14460/AT5G52950/AT4G20010/AT5G44785/AT5G45720/AT1G10520/AT2G16440/AT4G29910/AT1G10930/AT2G21790/AT1G30680…	60
GO:0016579	protein deubiquitination	36/6049	50/19652	2.34493e-09	1.04263e-07	8.13338e-08	AT5G65450/AT2G40930/AT4G22350/AT3G11910/AT3G47890/AT1G52450/AT1G17110/AT5G57990/AT5G61950/AT5G06600/AT3G47910/AT3G14400/AT5G61940/AT1G48790/AT4G22285/AT3G49600/AT4G31670/AT5G46740/AT1G65120/AT4G24560/AT4G10570/AT1G04860/AT5G22030/AT2G22310/AT4G17895/AT1G65110/AT2G24640/AT3G20630/AT1G52430/AT1G10600/AT4G10590/AT4G39370/AT2G32780/AT1G65200/AT2G27630/AT5G51530	36
GO:0032259	methylation	152/6049	329/19652	2.3996e-09	1.04263e-07	8.13338e-08	AT5G42400/AT5G43990/AT3G18000/AT1G05830/AT1G64600/AT1G23360/AT4G27910/AT2G23380/AT4G17610/AT4G20130/AT1G76710/AT2G32170/AT2G31650/AT2G23740/AT5G26180/AT3G61740/AT4G30860/AT1G45248/AT5G64030/AT4G19020/AT4G27340/AT5G05570/AT1G45231/AT1G13790/AT5G53430/AT4G26600/AT1G19340/AT4G02020/AT4G15180/AT2G28450/AT4G20920/AT1G16650/AT4G40000/AT5G55920/AT2G16370/AT3G61990/AT5G37170/AT1G06560/AT4G16570/AT5G19300…	152
GO:0042254	ribosome biogenesis	58/6049	97/19652	3.15255e-09	1.30455e-07	1.01766e-07	AT5G66540/AT5G08420/AT3G01540/AT1G69070/AT1G17690/AT1G29940/AT2G40360/AT1G06720/AT3G06530/AT2G48120/AT3G21540/AT3G11964/AT5G27120/AT2G40430/AT5G37350/AT1G13160/AT4G26600/AT1G79150/AT3G12860/AT3G12080/AT2G24990/AT5G55920/AT5G18570/AT3G57660/AT1G06560/AT2G37990/AT1G10300/AT1G31970/AT2G17250/AT4G25730/AT1G15440/AT1G31660/AT1G42440/AT1G03530/AT3G06480/AT5G39960/AT2G25870/AT1G51380/AT1G56110/AT5G46420…	58
GO:0030048	actin filament-based movement	18/6049	19/19652	8.14267e-09	3.21636e-07	2.50903e-07	AT4G27370/AT2G20290/AT3G58160/AT5G54280/AT4G28710/AT4G33200/AT2G33240/AT1G04160/AT1G17580/AT5G20490/AT1G50360/AT5G43900/AT1G08730/AT1G04600/AT2G31900/AT5G20610/AT1G42550/AT1G54560	18
GO:0000724	double-strand break repair via homologous recombination	31/6049	44/19652	6.98069e-08	2.63749e-06	2.05747e-06	AT5G01630/AT5G61460/AT5G24280/AT5G07660/AT1G67500/AT5G22750/AT4G00020/AT5G15920/AT5G16630/AT3G05210/AT3G02680/AT5G41150/AT4G30870/AT1G65470/AT3G09660/AT4G21070/AT3G18730/AT3G19210/AT1G35530/AT5G64630/AT1G10930/AT3G13782/AT5G56950/AT5G63540/AT5G64520/AT3G02920/AT2G19480/AT2G28560/AT1G14750/AT3G13170/AT4G31400	31
GO:0071897	DNA biosynthetic process	22/6049	27/19652	7.65619e-08	2.77218e-06	2.16254e-06	AT5G44750/AT1G66730/AT5G63960/AT4G24790/AT4G32700/AT3G20540/AT1G78650/AT5G57160/AT5G44740/AT1G08260/AT5G67100/AT1G08130/AT4G18820/AT1G50840/AT2G02480/AT1G14460/AT3G49500/AT5G45720/AT1G10520/AT2G27120/AT3G52050/AT1G49250	22
GO:0009908	flower development	105/6049	220/19652	9.12648e-08	3.17236e-06	2.47472e-06	AT5G65050/AT1G30970/AT1G01040/AT4G16280/AT3G23980/AT5G08230/AT5G64390/AT3G54720/AT5G06100/AT4G37750/AT3G57230/AT2G23380/AT2G32700/AT2G36740/AT1G76710/AT5G51230/AT1G72560/AT5G44180/AT3G63070/AT3G12810/AT4G25520/AT5G46210/AT4G03110/AT5G64960/AT5G45190/AT2G47700/AT3G54610/AT5G61150/AT5G13480/AT4G31610/AT4G03090/AT5G08450/AT1G79730/AT3G07610/AT3G06400/AT2G06990/AT4G02560/AT1G17110/AT2G15530/AT5G27220…	105
GO:0046777	protein autophosphorylation	61/6049	111/19652	1.01163e-07	3.38118e-06	2.63761e-06	AT4G24740/AT4G32660/AT5G04510/AT1G08720/AT3G13690/AT5G03730/AT3G20200/AT3G07980/AT5G58350/AT3G17850/AT2G31800/AT4G16970/AT1G69220/AT2G01450/AT5G58140/AT1G67840/AT1G11350/AT5G50860/AT5G35980/AT2G43850/AT3G45780/AT4G14340/AT1G61380/AT3G45240/AT1G56720/AT5G49760/AT3G13530/AT5G66850/AT5G60280/AT1G71830/AT1G09000/AT3G59110/AT1G08680/AT4G03260/AT2G46700/AT1G70520/AT1G18890/AT2G17520/AT1G06390/AT5G26570…	61
GO:0080188	gene silencing by RNA-directed DNA methylation	26/6049	35/19652	1.45341e-07	4.67783e-06	3.64911e-06	AT5G43990/AT1G50410/AT1G19100/AT3G20010/AT3G12550/AT1G05490/AT1G13790/AT1G54440/AT2G27040/AT5G59390/AT3G07610/AT1G80790/AT3G14980/AT5G35910/AT4G00380/AT1G15910/AT2G21450/AT3G48670/AT3G54760/AT3G42670/AT5G04290/AT4G03430/AT3G29375/AT3G24340/AT5G20420/AT2G33290	26
GO:0060255	regulation of macromolecule metabolic process	17/6049	19/19652	1.69628e-07	5.26453e-06	4.10678e-06	AT5G26610/AT4G27910/AT3G07740/AT3G61740/AT5G23570/AT3G12550/AT1G13790/AT5G53430/AT1G80790/AT4G16420/AT4G00380/AT1G15910/AT3G48670/AT1G74250/AT4G34430/AT5G09790/AT5G24330	17
GO:0034220	monoatomic ion transmembrane transport	62/6049	115/19652	2.01566e-07	6.04003e-06	4.71174e-06	AT2G23790/AT4G02900/AT2G23980/AT5G10490/AT5G26240/AT3G01100/AT1G30270/AT1G05200/AT2G46450/AT4G18290/AT1G73020/AT1G58200/AT5G37500/AT2G48060/AT3G17700/AT3G51480/AT1G58520/AT5G27100/AT3G07520/AT4G35440/AT1G25480/AT1G55620/AT4G22200/AT1G78610/AT1G11960/AT1G69450/AT5G33280/AT3G54510/AT4G35290/AT4G15430/AT5G46240/AT2G45870/AT2G32390/AT1G42540/AT5G14870/AT5G53130/AT4G32500/AT1G32090/AT3G14810/AT3G17690…	62
GO:0046488	phosphatidylinositol metabolic process	15/6049	16/19652	2.37402e-07	6.65492e-06	5.19141e-06	AT3G56960/AT3G09920/AT2G41210/AT3G07960/AT3G59770/AT4G33240/AT3G14270/AT1G10900/AT1G21980/AT1G60890/AT1G77740/AT1G34260/AT1G71010/AT4G01190/AT1G01460	15
GO:0051276	chromosome organization	15/6049	16/19652	2.37402e-07	6.65492e-06	5.19141e-06	AT1G79950/AT5G48600/AT5G61460/AT5G62410/AT5G07660/AT3G47460/AT5G24630/AT5G15920/AT2G27170/AT3G54670/AT5G58270/AT1G79890/AT1G10930/AT2G31270/AT5G05490	15
GO:0001510	RNA methylation	21/6049	27/19652	6.50248e-07	1.75127e-05	1.36614e-05	AT5G26180/AT1G45231/AT4G26600/AT2G28450/AT4G20920/AT4G40000/AT5G55920/AT1G06560/AT2G22400/AT3G13180/AT3G21300/AT3G54170/AT4G25730/AT5G13830/AT5G51130/AT4G10760/AT4G20910/AT1G30545/AT3G27180/AT4G38020/AT5G01230	21
GO:0009793	embryo development ending in seed dormancy	139/6049	318/19652	6.65681e-07	1.75127e-05	1.36614e-05	AT4G00060/AT4G04350/AT1G68990/AT2G14680/AT5G48600/AT3G54720/AT4G24900/AT2G32700/AT1G78580/AT5G22640/AT5G22800/AT2G35340/AT1G17690/AT1G30610/AT3G48110/AT5G15540/AT4G00020/AT1G32230/AT4G25520/AT4G07410/AT3G16810/AT1G21650/AT1G50030/AT5G16715/AT5G22110/AT2G34090/AT5G64580/AT3G24560/AT3G54010/AT2G35510/AT4G20060/AT1G03910/AT3G12670/AT3G27670/AT5G13480/AT1G61030/AT1G14610/AT2G26890/AT5G55300/AT3G12080…	139
GO:0006075	(1->3)-beta-D-glucan biosynthetic process	12/6049	12/19652	7.17859e-07	1.75127e-05	1.36614e-05	AT3G14570/AT3G59100/AT2G36850/AT1G05570/AT5G13000/AT3G07160/AT1G06490/AT4G04970/AT2G31960/AT4G03550/AT2G13680/AT5G36870	12
GO:0006282	regulation of DNA repair	12/6049	12/19652	7.17859e-07	1.75127e-05	1.36614e-05	AT1G19100/AT4G24970/AT3G13226/AT4G36290/AT5G40820/AT5G66130/AT4G36280/AT3G05480/AT2G31870/AT4G29860/AT2G31865/AT5G13130	12
GO:0007062	sister chromatid cohesion	14/6049	15/19652	7.25498e-07	1.75127e-05	1.36614e-05	AT5G61460/AT5G07660/AT5G15540/AT1G04730/AT5G15920/AT2G27170/AT3G54670/AT3G59550/AT5G16270/AT5G40840/AT4G15890/AT2G40550/AT5G05490/AT4G31400	14
GO:0045814	negative regulation of gene expression, epigenetic	25/6049	35/19652	8.75094e-07	2.05529e-05	1.6033e-05	AT1G63490/AT3G02890/AT3G18520/AT2G23380/AT1G21610/AT4G11560/AT5G16680/AT2G23740/AT5G01270/AT4G02020/AT1G03770/AT2G27350/AT5G44280/AT1G08620/AT5G11530/AT5G10010/AT4G20400/AT5G17690/AT5G46910/AT3G10490/AT1G08060/AT3G20810/AT1G09320/AT4G39100/AT3G44600	25
GO:0006357	regulation of transcription by RNA polymerase II	76/6049	154/19652	1.04153e-06	2.38181e-05	1.85801e-05	AT5G09410/AT4G32730/AT2G47410/AT2G31650/AT3G07740/AT5G44180/AT5G01270/AT5G05660/AT5G19480/AT4G21670/AT1G79000/AT5G12230/AT1G05230/AT5G58610/AT5G64960/AT5G45190/AT1G77800/AT5G27620/AT1G17920/AT2G33540/AT1G79020/AT5G13020/AT1G27630/AT2G34640/AT3G07610/AT1G79700/AT1G76510/AT4G08350/AT2G36010/AT2G17410/AT4G16420/AT5G26760/AT1G28420/AT1G55325/AT4G00450/AT5G04670/AT3G58780/AT2G43010/AT5G15800/AT5G48640…	76
GO:0008360	regulation of cell shape	19/6049	24/19652	1.41205e-06	3.14634e-05	2.45442e-05	AT3G14570/AT3G08840/AT3G59100/AT2G47410/AT2G36850/AT1G05570/AT5G13000/AT1G77460/AT3G07160/AT1G06490/AT4G04970/AT2G31960/AT2G22125/AT4G16340/AT1G63680/AT5G23260/AT4G03550/AT2G13680/AT5G36870	19
GO:0006289	nucleotide-excision repair	20/6049	26/19652	1.65655e-06	3.59885e-05	2.80742e-05	AT3G61420/AT5G41370/AT3G28030/AT1G20720/AT5G08110/AT1G55750/AT5G16630/AT4G17020/AT5G41150/AT4G15475/AT2G06040/AT1G03190/AT1G05120/AT1G10520/AT5G41360/AT5G21900/AT1G18340/AT1G16190/AT3G02920/AT3G02540	20
GO:0009553	embryo sac development	42/6049	73/19652	1.93103e-06	4.09285e-05	3.19278e-05	AT1G17690/AT4G00020/AT1G67120/AT3G03110/AT5G59980/AT3G11964/AT5G55820/AT1G17760/AT1G14350/AT4G15570/AT3G23940/AT1G72440/AT3G06400/AT1G61140/AT5G57880/AT5G62230/AT1G01690/AT5G07180/AT2G02820/AT1G15440/AT2G43410/AT1G31660/AT5G60410/AT5G05970/AT4G05410/AT3G12280/AT5G41190/AT5G48030/AT5G17020/AT2G41500/AT1G09100/AT2G34260/AT1G63990/AT2G34920/AT5G44700/AT1G14360/AT5G18000/AT4G31400/AT5G52520/AT5G24120…	42
GO:0080111	DNA demethylation	13/6049	14/19652	2.20756e-06	4.56756e-05	3.56309e-05	AT3G10010/AT1G80420/AT3G14890/AT5G04560/AT1G08130/AT1G05910/AT4G36050/AT3G15120/AT2G36490/AT5G58130/AT1G72270/AT4G31270/AT4G34060	13
GO:0040029	epigenetic regulation of gene expression	32/6049	51/19652	2.43064e-06	4.91214e-05	3.8319e-05	AT1G05830/AT1G79350/AT2G31650/AT4G21430/AT4G00990/AT5G11470/AT5G63080/AT5G66750/AT5G55390/AT4G15180/AT1G54490/AT2G46020/AT3G07610/AT2G27350/AT3G18730/AT5G11530/AT2G35160/AT4G24680/AT5G04240/AT3G48430/AT5G40340/AT3G01460/AT2G28290/AT5G27650/AT3G21820/AT3G06930/AT5G03280/AT3G09670/AT4G00830/AT3G20810/AT4G29730/AT2G33290	32
GO:0006816	calcium ion transport	31/6049	49/19652	2.70311e-06	5.33865e-05	4.1646e-05	AT4G32060/AT2G23790/AT5G53010/AT1G10130/AT4G29900/AT1G05200/AT3G51480/AT3G51860/AT4G00900/AT5G27100/AT3G07520/AT1G64150/AT4G35290/AT2G32390/AT1G42540/AT3G22910/AT1G27770/AT5G57110/AT2G17260/AT1G55730/AT3G63380/AT5G48400/AT3G21180/AT4G03560/AT1G07670/AT3G57330/AT2G41560/AT2G32400/AT1G07810/AT4G35920/AT4G31710	31
GO:0048481	plant ovule development	29/6049	45/19652	3.28643e-06	6.34646e-05	4.95079e-05	AT1G68990/AT1G25350/AT5G21150/AT4G25520/AT3G55400/AT5G49030/AT4G21530/AT2G41670/AT5G62090/AT1G11130/AT5G62230/AT5G07180/AT1G43850/AT5G60410/AT4G17300/AT1G32240/AT2G25840/AT4G36920/AT3G58780/AT5G15800/AT3G13490/AT4G29860/AT5G62000/AT1G11870/AT5G23260/AT5G16560/AT3G52600/AT5G52520/AT3G55220	29
GO:0006418	tRNA aminoacylation for protein translation	28/6049	43/19652	3.58684e-06	6.77601e-05	5.28587e-05	AT4G04350/AT1G17960/AT4G33760/AT1G25350/AT3G56300/AT3G55400/AT5G16715/AT1G28350/AT5G49030/AT5G26830/AT1G14610/AT2G31170/AT2G33840/AT4G10320/AT4G17300/AT2G25840/AT4G26300/AT3G11710/AT2G04842/AT3G13490/AT1G66530/AT4G13780/AT1G11870/AT1G29880/AT3G07420/AT3G04600/AT5G52520/AT3G23145	28
GO:0007131	reciprocal meiotic recombination	20/6049	27/19652	4.5317e-06	8.33749e-05	6.50396e-05	AT5G23610/AT1G53490/AT3G02680/AT4G14970/AT4G35520/AT3G20475/AT1G22275/AT1G22260/AT3G27730/AT5G52290/AT5G64520/AT2G33793/AT1G12790/AT4G24710/AT1G63990/AT3G13170/AT2G06510/AT5G48390/AT4G29170/AT5G50930	20
GO:0070588	calcium ion transmembrane transport	36/6049	61/19652	4.60529e-06	8.33749e-05	6.50396e-05	AT2G23790/AT5G53010/AT1G10130/AT2G23980/AT4G29900/AT1G05200/AT3G51480/AT2G17780/AT3G51860/AT4G00900/AT5G27100/AT3G07520/AT1G11960/AT1G64150/AT4G35290/AT2G32390/AT1G42540/AT3G22910/AT1G27770/AT5G57110/AT5G14870/AT2G17260/AT1G55730/AT3G63380/AT5G48400/AT5G57940/AT3G21180/AT4G03560/AT4G30560/AT1G07670/AT3G57330/AT2G41560/AT2G32400/AT1G07810/AT4G35920/AT4G31710	36
GO:0045010	actin nucleation	15/6049	18/19652	6.14822e-06	0.000109037	8.50581e-05	AT2G46225/AT2G38440/AT4G15200/AT5G18410/AT3G05470/AT5G54650/AT2G35110/AT3G25500/AT4G14147/AT5G67470/AT5G07780/AT2G43800/AT3G07540/AT1G59910/AT1G70140	15
GO:0006298	mismatch repair	12/6049	13/19652	6.68428e-06	0.000116173	9.06247e-05	AT1G65070/AT4G02460/AT4G02070/AT3G24320/AT5G54090/AT4G35520/AT3G18524/AT3G20475/AT4G25540/AT3G24495/AT4G09140/AT4G17380	12
GO:0042908	xenobiotic transport	18/6049	24/19652	1.04072e-05	0.000177331	0.000138334	AT3G60970/AT1G30420/AT1G30410/AT2G38330/AT3G21250/AT3G13080/AT4G38380/AT3G60160/AT1G30400/AT2G34660/AT3G13100/AT3G59140/AT3G62700/AT1G04120/AT2G47800/AT2G21340/AT3G08040/AT1G71140	18
GO:0006813	potassium ion transport	45/6049	84/19652	1.13314e-05	0.000189365	0.000147721	AT5G02940/AT4G00630/AT1G54370/AT5G11800/AT2G23980/AT2G35060/AT2G19600/AT2G01980/AT4G04850/AT3G46960/AT1G79610/AT1G14660/AT1G30270/AT4G18290/AT5G37500/AT1G01790/AT3G05030/AT1G31120/AT4G22200/AT5G51710/AT5G46240/AT5G55470/AT2G30070/AT1G05580/AT4G32500/AT1G30450/AT3G44900/AT4G33530/AT2G28260/AT5G01690/AT1G08140/AT2G28180/AT4G30560/AT2G25600/AT1G08150/AT5G09400/AT1G08135/AT5G14880/AT3G17630/AT4G19960…	45
GO:0007015	actin filament organization	29/6049	47/19652	1.15749e-05	0.000189785	0.000148048	AT2G20290/AT2G29890/AT4G28710/AT4G33200/AT2G33240/AT1G04160/AT1G17580/AT3G57410/AT1G75100/AT5G20490/AT2G41740/AT5G43900/AT1G08730/AT1G04600/AT3G27000/AT4G30160/AT5G57320/AT2G40820/AT2G31900/AT2G35110/AT4G14147/AT2G26770/AT2G30910/AT1G30825/AT1G60430/AT1G54560/AT2G31300/AT1G13180/AT1G01750	29
GO:0015914	phospholipid transport	13/6049	15/19652	1.1841e-05	0.000190552	0.000148647	AT1G59820/AT1G26130/AT3G27870/AT1G68710/AT5G44240/AT1G72700/AT1G17500/AT3G13900/AT1G54280/AT3G12740/AT5G63060/AT1G13210/AT5G04930	13
GO:0034204	lipid translocation	11/6049	12/19652	2.0125e-05	0.000317975	0.000248048	AT1G59820/AT1G26130/AT3G27870/AT1G68710/AT5G44240/AT1G72700/AT1G17500/AT3G13900/AT1G54280/AT1G13210/AT5G04930	11
GO:0006886	intracellular protein transport	73/6049	158/19652	3.16318e-05	0.000490858	0.000382911	AT1G23935/AT5G06120/AT3G61480/AT5G28350/AT3G56450/AT3G09560/AT5G66160/AT5G26980/AT1G22860/AT1G26170/AT4G00800/AT3G55480/AT1G21650/AT3G03110/AT3G08960/AT3G17340/AT3G15980/AT3G44340/AT1G24460/AT4G01800/AT3G27530/AT2G38020/AT3G43300/AT3G29100/AT4G02195/AT1G79990/AT2G36070/AT1G48550/AT1G52360/AT3G59020/AT5G62600/AT1G73430/AT4G32640/AT5G22770/AT2G27460/AT3G08530/AT4G23460/AT1G23900/AT3G23660/AT2G21630…	73
GO:0016573	histone acetylation	12/6049	14/19652	3.35446e-05	0.00050259	0.000392063	AT1G55970/AT3G12980/AT1G79000/AT1G16710/AT3G54610/AT5G09740/AT1G67220/AT3G33520/AT1G49540/AT5G56740/AT3G19040/AT5G64610	12
GO:0071482	cellular response to light stimulus	12/6049	14/19652	3.35446e-05	0.00050259	0.000392063	AT2G36390/AT3G53920/AT2G48120/AT2G36990/AT5G03650/AT2G30170/AT1G64860/AT5G13730/AT1G08540/AT1G07180/AT5G24120/AT3G08550	12
GO:0010073	meristem maintenance	24/6049	38/19652	3.79673e-05	0.000559213	0.000436234	AT1G52150/AT2G32700/AT1G08840/AT5G19740/AT4G07410/AT4G32980/AT5G23630/AT2G25010/AT5G02130/AT3G54170/AT1G50750/AT4G32551/AT4G36920/AT1G32120/AT3G51290/AT1G17930/AT1G50770/AT3G02130/AT2G04865/AT1G50830/AT1G71040/AT1G17240/AT1G50760/AT5G06250	24
GO:0007129	homologous chromosome pairing at meiosis	13/6049	16/19652	4.52026e-05	0.000654684	0.00051071	AT1G48360/AT3G63480/AT4G14970/AT4G30870/AT1G22275/AT1G22260/AT3G12280/AT4G17380/AT4G24710/AT1G63990/AT3G13170/AT5G48390/AT5G50930	13
GO:0009658	chloroplast organization	69/6049	149/19652	4.69148e-05	0.000668344	0.000521365	AT4G00630/AT5G67570/AT2G31530/AT5G22640/AT4G20130/AT3G19180/AT1G30610/AT5G26980/AT3G62910/AT1G10910/AT2G48120/AT5G02250/AT3G04340/AT4G35780/AT3G24560/AT4G04850/AT3G47390/AT2G04270/AT3G19570/AT5G19620/AT4G34020/AT1G01790/AT5G18570/AT2G24060/AT5G58270/AT4G23940/AT4G01800/AT4G13670/AT1G63900/AT4G02195/AT2G47940/AT5G63420/AT5G53080/AT1G49970/AT1G79600/AT1G24490/AT2G25870/AT5G35220/AT5G48470/AT5G16620…	69
GO:0031507	heterochromatin formation	10/6049	11/19652	6.01943e-05	0.000806559	0.000629185	AT1G09060/AT5G66750/AT4G02020/AT1G65470/AT2G27040/AT5G64630/AT5G17690/AT2G28240/AT1G08060/AT5G04290	10
GO:0051171	regulation of nitrogen compound metabolic process	10/6049	11/19652	6.01943e-05	0.000806559	0.000629185	AT3G59410/AT4G27910/AT3G07740/AT3G61740/AT5G53430/AT4G16420/AT4G34430/AT5G09790/AT5G24330/AT3G03910	10
GO:0000911	cytokinesis by cell plate formation	25/6049	41/19652	6.15901e-05	0.000806559	0.000629185	AT1G01040/AT4G26760/AT3G17360/AT2G28620/AT3G19050/AT3G43210/AT4G22970/AT2G35630/AT5G10470/AT1G49040/AT1G50240/AT2G41670/AT5G13260/AT1G12360/AT1G18370/AT5G51600/AT5G18700/AT5G54440/AT5G55230/AT2G35190/AT3G48860/AT3G01780/AT5G11040/AT1G53140/AT4G08630	25
GO:0007059	chromosome segregation	25/6049	41/19652	6.15901e-05	0.000806559	0.000629185	AT5G04320/AT5G63920/AT5G15540/AT2G27170/AT3G54670/AT3G10440/AT2G32900/AT1G61030/AT5G55300/AT4G22970/AT1G11060/AT2G47980/AT5G57880/AT3G59550/AT5G16270/AT5G40840/AT5G16800/AT5G51340/AT2G20635/AT1G12790/AT5G05490/AT5G06590/AT1G63990/AT3G48210/AT3G02980	25
GO:0006302	double-strand break repair	16/6049	22/19652	6.21858e-05	0.000806559	0.000629185	AT2G31970/AT5G61460/AT3G20540/AT5G57160/AT1G48050/AT3G02680/AT4G30870/AT5G54260/AT1G08130/AT5G16270/AT1G10520/AT5G40840/AT3G23100/AT5G21140/AT5G57450/AT4G29170	16
GO:0046856	phosphatidylinositol dephosphorylation	16/6049	22/19652	6.21858e-05	0.000806559	0.000629185	AT3G63240/AT3G14205/AT1G05630/AT2G43900/AT3G43220/AT1G05470/AT2G32010/AT1G34120/AT1G65580/AT1G17340/AT5G20840/AT1G71710/AT3G19420/AT1G22620/AT2G31830/AT4G18010	16
GO:0015031	protein transport	235/6049	620/19652	7.34742e-05	0.000938957	0.000732467	AT2G37840/AT1G50970/AT1G23935/AT1G55690/AT4G19490/AT3G10380/AT1G02010/AT2G31530/AT5G08470/AT2G25660/AT1G19650/AT3G56450/AT1G75850/AT5G22640/AT1G03000/AT2G21520/AT3G24840/AT1G49180/AT1G50500/AT1G21170/AT4G02030/AT5G66160/AT1G79810/AT5G26980/AT5G54730/AT1G22860/AT3G55480/AT2G04030/AT1G59820/AT1G21650/AT5G47480/AT3G53930/AT1G50730/AT3G03110/AT2G25350/AT1G13120/AT5G17670/AT4G25650/AT1G13160/AT5G66930…	235
GO:0009791	post-embryonic development	35/6049	65/19652	9.04869e-05	0.00113961	0.000888994	AT4G04350/AT1G25350/AT3G20440/AT1G17580/AT1G50030/AT5G16715/AT5G49030/AT4G15180/AT1G14610/AT5G20490/AT5G55300/AT2G25420/AT3G27530/AT5G11530/AT2G32410/AT3G16830/AT5G27030/AT5G57390/AT1G80490/AT4G10320/AT1G15750/AT3G15880/AT1G55180/AT2G25840/AT3G13300/AT5G13570/AT4G26300/AT1G66530/AT4G13780/AT4G27630/AT2G30280/AT1G18560/AT3G04600/AT1G64990/AT4G39100	35
GO:0006265	DNA topological change	11/6049	13/19652	9.40491e-05	0.00115111	0.000897963	AT5G55310/AT4G31210/AT5G63920/AT3G20780/AT5G04130/AT3G10690/AT5G55300/AT3G23890/AT2G32000/AT3G10270/AT5G04110	11
GO:0051026	chiasma assembly	11/6049	13/19652	9.40491e-05	0.00115111	0.000897963	AT1G53490/AT3G20475/AT5G57880/AT1G01690/AT3G27730/AT1G03180/AT1G63990/AT1G14750/AT3G13170/AT1G13330/AT2G06510	11
GO:0006270	DNA replication initiation	12/6049	15/19652	0.000120359	0.00143276	0.00111768	AT1G77320/AT2G07690/AT5G44635/AT5G46280/AT2G20980/AT2G16440/AT1G44900/AT2G29680/AT1G80190/AT1G67320/AT4G02060/AT1G07270	12
GO:0010072	primary shoot apical meristem specification	12/6049	15/19652	0.000120359	0.00143276	0.00111768	AT1G30490/AT2G34710/AT4G32880/AT5G43810/AT1G36160/AT3G16830/AT5G27030/AT1G80490/AT1G15750/AT3G15880/AT3G13300/AT5G13570	12
GO:0009910	negative regulation of flower development	24/6049	40/19652	0.000123933	0.00145538	0.00113532	AT5G65050/AT1G30970/AT5G65060/AT2G31650/AT5G51230/AT3G04240/AT5G61150/AT1G79280/AT5G16260/AT1G79730/AT5G11530/AT5G23150/AT4G20400/AT5G60410/AT5G49160/AT5G17690/AT5G60800/AT3G33520/AT3G05040/AT4G00650/AT1G61040/AT5G13790/AT4G26150/AT3G57390	24
GO:0030036	actin cytoskeleton organization	18/6049	27/19652	0.000130529	0.0015124	0.0011798	AT2G34150/AT1G29170/AT2G38440/AT5G35700/AT4G15200/AT5G18410/AT3G27000/AT4G18600/AT3G05470/AT3G13870/AT5G54650/AT3G25500/AT5G67470/AT5G01730/AT2G43800/AT3G07540/AT1G59910/AT1G70140	18
GO:0030422	siRNA processing	13/6049	17/19652	0.000137628	0.00157367	0.0012276	AT1G01040/AT5G23570/AT4G20920/AT3G43920/AT2G27040/AT5G23080/AT2G32940/AT3G49500/AT1G56310/AT2G40030/AT5G04290/AT1G63020/AT1G14790	13
GO:0009555	pollen development	99/6049	235/19652	0.000142375	0.0016068	0.00125345	AT1G79950/AT4G02460/AT3G18000/AT1G42470/AT2G35060/AT4G00800/AT3G63480/AT4G35420/AT3G03110/AT5G64560/AT5G05570/AT3G43210/AT5G01450/AT4G20060/AT1G08600/AT4G31610/AT3G23940/AT1G65470/AT1G72440/AT3G07610/AT3G09660/AT5G58270/AT2G36850/AT5G15470/AT2G03060/AT2G38185/AT1G77850/AT3G07160/AT4G29380/AT5G64630/AT3G10405/AT4G33240/AT4G14790/AT4G04970/AT5G57880/AT3G14270/AT1G01690/AT3G59550/AT1G31660/AT1G05960…	99
GO:0071805	potassium ion transmembrane transport	29/6049	52/19652	0.000157678	0.0017567	0.00137037	AT4G00630/AT5G11800/AT2G23980/AT2G35060/AT2G19600/AT2G01980/AT1G30270/AT4G18290/AT5G37500/AT1G01790/AT1G31120/AT4G22200/AT5G51710/AT5G46240/AT2G30070/AT1G05580/AT4G32500/AT5G13750/AT1G30450/AT4G33530/AT2G28260/AT4G30560/AT2G25600/AT5G09400/AT5G14880/AT4G19960/AT2G26650/AT4G32650/AT2G30240	29
GO:0036297	interstrand cross-link repair	9/6049	10/19652	0.000178647	0.00194031	0.00151361	AT1G79950/AT1G48360/AT5G08110/AT5G22750/AT5G65740/AT1G35530/AT5G03450/AT5G44010/AT5G50930	9
GO:0080090	regulation of primary metabolic process	9/6049	10/19652	0.000178647	0.00194031	0.00151361	AT3G59410/AT4G27910/AT3G07740/AT3G61740/AT5G53430/AT4G16420/AT4G34430/AT5G09790/AT5G24330	9
GO:0000398	mRNA splicing, via spliceosome	56/6049	120/19652	0.000180857	0.00194031	0.00151361	AT3G54230/AT1G10320/AT3G50670/AT4G36690/AT5G37370/AT1G55310/AT1G60900/AT3G48120/AT4G38780/AT5G63370/AT1G09230/AT2G16860/AT1G03910/AT5G06160/AT2G13540/AT5G52040/AT4G25500/AT3G61860/AT5G16260/AT4G21660/AT1G28060/AT1G65660/AT5G16780/AT2G40650/AT1G80070/AT1G09770/AT1G14650/AT5G13010/AT3G16650/AT3G05760/AT3G13210/AT1G17130/AT1G80060/AT1G10580/AT5G41770/AT3G07860/AT5G08550/AT2G41500/AT4G37120/AT4G03430…	56
GO:0048364	root development	79/6049	183/19652	0.000256096	0.00271399	0.00211715	AT2G31280/AT1G79950/AT1G10130/AT3G54720/AT1G78580/AT2G25170/AT1G05630/AT1G01950/AT5G24630/AT1G59820/AT2G20000/AT1G06150/AT3G54010/AT4G03090/AT3G16785/AT3G23940/AT5G58270/AT1G24460/AT5G63770/AT2G25180/AT1G17110/AT5G44280/AT5G16780/AT5G03540/AT4G13750/AT1G06230/AT1G36160/AT4G04920/AT1G19850/AT5G57390/AT5G24310/AT5G05980/AT5G13010/AT1G78240/AT1G55180/AT1G49340/AT4G24560/AT5G10510/AT1G44900/AT2G22840…	79
GO:0007064	mitotic sister chromatid cohesion	10/6049	12/19652	0.000260541	0.00272783	0.00212794	AT1G80810/AT1G77600/AT5G47690/AT4G31880/AT1G61030/AT1G11060/AT1G15940/AT5G10950/AT5G51340/AT4G31400	10
GO:2000028	regulation of photoperiodism, flowering	33/6049	63/19652	0.000283239	0.00293018	0.00228579	AT5G65060/AT3G02890/AT4G11560/AT5G16680/AT4G21430/AT4G00990/AT5G01270/AT5G23570/AT4G03110/AT2G47700/AT2G25930/AT1G76380/AT1G20670/AT5G55040/AT3G48430/AT5G40340/AT3G24870/AT5G27650/AT3G10390/AT3G09670/AT2G46340/AT1G22770/AT2G18000/AT5G62640/AT2G42280/AT2G18790/AT4G09180/AT3G20810/AT5G64610/AT3G21320/AT1G03457/AT4G39100/AT4G26150	33
GO:0006914	autophagy	28/6049	51/19652	0.000290897	0.00297399	0.00231997	AT2G37840/AT1G49180/AT4G02030/AT5G54730/AT5G47480/AT3G53930/AT5G66930/AT5G47490/AT4G30790/AT3G61710/AT2G46240/AT1G54710/AT3G19190/AT4G29380/AT3G61960/AT3G49590/AT1G03380/AT4G30510/AT3G62770/AT5G45900/AT5G24360/AT4G36630/AT4G04620/AT1G54210/AT3G56440/AT3G18770/AT3G59950/AT2G40810	28
GO:0005982	starch metabolic process	11/6049	14/19652	0.000315899	0.00315536	0.00246145	AT2G36390/AT4G18240/AT1G67140/AT5G22510/AT5G03650/AT3G52180/AT5G49190/AT3G55760/AT5G26570/AT3G22380/AT4G24620	11
GO:0048589	developmental growth	11/6049	14/19652	0.000315899	0.00315536	0.00246145	AT1G63490/AT5G01270/AT2G28350/AT2G36850/AT5G53460/AT1G08620/AT3G07160/AT4G20400/AT5G60410/AT5G13530/AT1G71800	11
GO:0007030	Golgi organization	14/6049	20/19652	0.000349756	0.00345384	0.00269429	AT2G46180/AT1G18190/AT2G19950/AT3G61570/AT4G02030/AT5G26980/AT4G02195/AT1G73430/AT1G71830/AT5G11980/AT4G24840/AT3G07100/AT3G05710/AT4G04910	14
GO:0042147	retrograde transport, endosome to Golgi	13/6049	18/19652	0.000355273	0.0034689	0.00270604	AT1G50970/AT4G19490/AT3G61480/AT1G75850/AT1G50500/AT4G02030/AT1G50730/AT2G27900/AT3G51310/AT1G50120/AT1G48550/AT2G17790/AT5G64990	13
GO:0019252	starch biosynthetic process	20/6049	33/19652	0.000376076	0.00363122	0.00283266	AT1G11720/AT2G36390/AT5G19220/AT4G18240/AT3G20440/AT5G65685/AT2G21590/AT5G04360/AT1G27070/AT5G03650/AT2G39930/AT5G03420/AT4G39210/AT3G16000/AT1G27680/AT3G58560/AT5G24300/AT4G32190/AT5G51820/AT3G30720	20
GO:0006004	fucose metabolic process	23/6049	40/19652	0.000410379	0.00391889	0.00305707	AT1G14970/AT1G35510/AT1G22460/AT5G35570/AT2G03280/AT3G54100/AT3G30300/AT1G20550/AT5G64600/AT5G01100/AT2G01480/AT5G63390/AT1G76270/AT4G38390/AT1G62330/AT1G14020/AT2G37980/AT5G15740/AT3G03810/AT3G26370/AT1G11990/AT3G02250/AT1G38065	23
GO:0009294	DNA-mediated transformation	16/6049	25/19652	0.000619694	0.00585342	0.00456617	AT3G18520/AT2G23380/AT5G22750/AT1G79000/AT5G66750/AT5G53430/AT1G32750/AT1G06230/AT5G49160/AT4G14140/AT5G56950/AT5G09790/AT5G22650/AT2G19480/AT5G65630/AT1G80740	16
GO:0009637	response to blue light	26/6049	48/19652	0.00062688	0.00585762	0.00456945	AT1G26260/AT1G05630/AT5G38150/AT4G31390/AT5G27620/AT4G28880/AT2G21150/AT5G58140/AT2G34640/AT3G45780/AT5G43630/AT1G53090/AT1G66840/AT5G35840/AT4G00050/AT2G46340/AT1G22770/AT5G02200/AT5G20610/AT4G01120/AT1G42550/AT2G02710/AT5G43470/AT2G36910/AT4G28860/AT5G55280	26
GO:0009965	leaf morphogenesis	28/6049	53/19652	0.000670286	0.00619658	0.00483386	AT3G23980/AT1G52150/AT4G36380/AT1G55250/AT2G23380/AT2G44950/AT2G48120/AT1G48410/AT1G77600/AT5G55300/AT5G67100/AT5G55920/AT5G08370/AT1G68130/AT5G55540/AT3G05040/AT3G13300/AT5G13300/AT2G26330/AT5G13680/AT1G25250/AT2G01940/AT3G20630/AT4G03550/AT3G09000/AT4G36870/AT2G01500/AT1G68480	28
GO:0010228	vegetative to reproductive phase transition of meristem	48/6049	104/19652	0.000687378	0.00624701	0.0048732	AT1G10570/AT1G01040/AT3G57300/AT1G05830/AT3G12140/AT1G55250/AT2G23380/AT1G76710/AT2G31650/AT4G12680/AT5G44180/AT1G03160/AT1G60220/AT2G44950/AT5G55390/AT4G32980/AT4G15180/AT3G04240/AT2G46240/AT5G18620/AT3G06400/AT4G02560/AT2G15530/AT5G06780/AT3G48430/AT2G43410/AT3G03140/AT1G28420/AT2G39810/AT3G10490/AT2G02560/AT3G10390/AT4G00650/AT3G28730/AT3G06930/AT4G27630/AT2G35720/AT4G34040/AT1G20960/AT4G10710…	48
GO:0044238	primary metabolic process	32/6049	63/19652	0.000706535	0.00624701	0.0048732	AT5G35170/AT2G42330/AT3G02030/AT3G28030/AT1G07745/AT5G41130/AT5G05570/AT1G54570/AT4G21060/AT5G41120/AT5G47840/AT3G26840/AT1G01220/AT3G43840/AT1G26810/AT4G31050/AT3G06580/AT3G13440/AT5G44780/AT5G08550/AT3G20930/AT1G74800/AT2G42780/AT2G21070/AT2G28560/AT3G10700/AT4G16130/AT1G53260/AT1G27120/AT5G09210/AT5G57450/AT1G17070	32
GO:0006401	RNA catabolic process	9/6049	11/19652	0.000711685	0.00624701	0.0048732	AT1G76630/AT3G46960/AT2G40410/AT2G06990/AT1G59760/AT3G03710/AT4G04880/AT1G60080/AT2G25100	9
GO:0006896	Golgi to vacuole transport	9/6049	11/19652	0.000711685	0.00624701	0.0048732	AT5G26980/AT3G55480/AT4G02195/AT1G10290/AT1G60070/AT3G05710/AT3G50860/AT5G16830/AT5G06140	9
GO:0009903	chloroplast avoidance movement	9/6049	11/19652	0.000711685	0.00624701	0.0048732	AT5G65460/AT5G38150/AT1G75100/AT2G26570/AT5G10470/AT3G45780/AT1G66840/AT5G20610/AT1G42550	9
GO:0000184	nuclear-transcribed mRNA catabolic process, nonsense-mediated decay	13/6049	19/19652	0.000807478	0.00687939	0.00536652	AT1G33980/AT3G01540/AT5G19400/AT4G21670/AT1G15280/AT2G39260/AT5G16260/AT5G47010/AT3G06480/AT5G63120/AT5G13570/AT1G55150/AT1G80000	13
GO:0006306	DNA methylation	13/6049	19/19652	0.000807478	0.00687939	0.00536652	AT5G04560/AT2G27040/AT2G32940/AT3G48670/AT1G15215/AT2G36490/AT4G26170/AT2G40030/AT5G04290/AT2G30280/AT3G17310/AT5G14620/AT5G15380	13
GO:0010492	maintenance of shoot apical meristem identity	13/6049	19/19652	0.000807478	0.00687939	0.00536652	AT5G01770/AT4G37750/AT5G19310/AT3G06010/AT1G03770/AT4G11920/AT2G25180/AT5G44280/AT3G08850/AT5G10510/AT3G07780/AT3G16857/AT1G69440	13
GO:0000723	telomere maintenance	12/6049	17/19652	0.000845505	0.00713278	0.00556418	AT4G09680/AT1G79950/AT2G05210/AT2G31970/AT1G48050/AT4G30870/AT3G48900/AT1G16970/AT5G06310/AT5G16850/AT5G13820/AT2G04395	12
GO:0010267	ta-siRNA processing	11/6049	15/19652	0.000853635	0.00713278	0.00556418	AT1G01040/AT3G03300/AT5G20320/AT5G23570/AT3G43920/AT5G09860/AT3G15390/AT3G49500/AT2G27100/AT3G10490/AT1G69440	11
GO:0010090	trichome morphogenesis	21/6049	37/19652	0.000919426	0.00753756	0.00587994	AT5G24630/AT1G17580/AT1G05230/AT5G45190/AT2G46225/AT5G20490/AT5G43900/AT2G38440/AT3G16630/AT4G01800/AT5G18410/AT3G27000/AT5G24310/AT1G19835/AT3G12280/AT4G19600/AT2G35110/AT1G03060/AT5G22220/AT1G30825/AT1G13180	21
GO:0043170	macromolecule metabolic process	21/6049	37/19652	0.000919426	0.00753756	0.00587994	AT2G42330/AT1G33410/AT2G36390/AT4G09020/AT1G07745/AT5G04360/AT5G03650/AT2G39930/AT4G27650/AT5G47880/AT5G44780/AT5G08550/AT3G20930/AT2G42780/AT2G28560/AT1G57820/AT1G53260/AT5G39550/AT5G09210/AT5G57450/AT1G17070	21
GO:0006811	monoatomic ion transport	147/6049	384/19652	0.000945306	0.0076773	0.00598895	AT5G02940/AT4G32060/AT2G23790/AT5G43745/AT4G00630/AT1G54370/AT1G10130/AT4G02900/AT5G50160/AT2G29650/AT5G11800/AT3G06450/AT2G23980/AT5G21930/AT4G29900/AT5G10490/AT2G24520/AT5G26240/AT2G35060/AT2G19600/AT3G42640/AT3G01100/AT5G64560/AT2G01980/AT4G04850/AT1G79610/AT1G14660/AT1G30270/AT1G15960/AT1G05200/AT2G46450/AT4G18290/AT1G73020/AT1G58200/AT3G26670/AT5G09690/AT5G26820/AT5G37500/AT1G01790/AT3G05030…	147
GO:0000373	Group II intron splicing	17/6049	28/19652	0.00100501	0.00808659	0.00630824	AT4G29750/AT5G27270/AT3G01370/AT5G16180/AT2G20020/AT4G14510/AT3G18390/AT3G23070/AT1G23400/AT1G70070/AT3G27550/AT4G01400/AT1G30010/AT3G22330/AT4G01037/AT4G31010/AT5G54890	17
GO:0006352	DNA-templated transcription initiation	20/6049	35/19652	0.00108028	0.00861251	0.0067185	AT3G53920/AT3G09360/AT2G45100/AT2G36990/AT5G43130/AT5G62950/AT3G13445/AT1G64860/AT1G17440/AT5G13730/AT3G10070/AT1G27720/AT2G01280/AT1G08540/AT1G55520/AT1G75670/AT1G54140/AT4G35540/AT5G24120/AT3G57370	20
GO:0006259	DNA metabolic process	16/6049	26/19652	0.00115207	0.00910134	0.00709983	AT5G44750/AT1G08840/AT1G29630/AT3G10690/AT5G44740/AT1G06670/AT3G23890/AT3G32920/AT5G10950/AT1G10520/AT5G60370/AT1G63990/AT3G46210/AT1G79050/AT3G10140/AT3G13170	16
GO:0051028	mRNA transport	32/6049	65/19652	0.00139387	0.0109124	0.0085126	AT1G33980/AT1G15280/AT3G03110/AT1G13120/AT1G75340/AT1G79280/AT5G09860/AT1G24706/AT1G55540/AT1G66260/AT2G45810/AT4G11790/AT5G40480/AT5G02770/AT3G14120/AT1G24310/AT5G05680/AT1G10390/AT1G59660/AT3G57350/AT3G10650/AT2G45000/AT5G17020/AT1G14850/AT5G42920/AT1G80680/AT3G61240/AT4G04910/AT4G32910/AT1G52380/AT1G80000/AT4G00660	32
GO:0009846	pollen germination	30/6049	60/19652	0.00142033	0.0110203	0.00859675	AT3G56960/AT1G05630/AT2G43900/AT3G03110/AT3G61710/AT5G23630/AT2G41210/AT4G24580/AT5G35700/AT3G07160/AT4G29380/AT3G45100/AT1G08660/AT2G47860/AT5G17020/AT1G77140/AT3G02130/AT2G26490/AT3G06540/AT3G48820/AT4G35540/AT4G38190/AT2G13680/AT5G36260/AT2G33100/AT3G55220/AT1G68090/AT2G07040/AT4G29470/AT3G07130	30
GO:0016571	histone methylation	14/6049	22/19652	0.00148284	0.01122	0.00875258	AT2G23380/AT1G76710/AT5G22450/AT1G79730/AT4G29790/AT5G13960/AT5G11530/AT2G35160/AT4G16420/AT3G33520/AT2G19390/AT2G22740/AT1G22950/AT2G33290	14
GO:0042127	regulation of cell population proliferation	14/6049	22/19652	0.00148284	0.01122	0.00875258	AT4G37750/AT1G69220/AT5G55920/AT5G13060/AT4G14713/AT4G16420/AT1G11130/AT1G55350/AT1G44900/AT2G26300/AT5G50915/AT3G20630/AT3G26090/AT1G63980	14
GO:0010182	sugar mediated signaling pathway	18/6049	31/19652	0.00148481	0.01122	0.00875258	AT1G16540/AT1G73660/AT1G78580/AT3G47990/AT1G05630/AT5G03730/AT5G46210/AT5G67030/AT2G36270/AT5G47010/AT3G48430/AT1G66340/AT3G51770/AT3G26090/AT5G03280/AT4G02060/AT4G15900/AT1G16610	18
GO:0006508	proteolysis	185/6049	501/19652	0.00170232	0.012657	0.00987355	AT1G10570/AT3G57470/AT4G21326/AT1G35340/AT2G24280/AT3G54720/AT1G73990/AT1G02300/AT5G53170/AT1G73310/AT1G12750/AT5G19740/AT5G65450/AT1G33360/AT1G28320/AT2G22980/AT3G26085/AT1G60220/AT5G53350/AT1G71696/AT3G50050/AT3G05790/AT2G40930/AT5G66960/AT3G19170/AT3G57680/AT4G30910/AT2G41790/AT5G19660/AT3G04340/AT5G64580/AT4G21640/AT1G67690/AT1G32940/AT4G35880/AT3G06820/AT5G56730/AT1G80210/AT5G51540/AT5G49840…	185
GO:0006417	regulation of translation	41/6049	89/19652	0.00170411	0.012657	0.00987355	AT3G59410/AT2G29140/AT5G17930/AT5G21150/AT3G20250/AT5G16180/AT3G16810/AT3G17040/AT1G48410/AT1G15280/AT1G72320/AT3G10360/AT4G30680/AT2G29200/AT2G27040/AT5G43810/AT1G80930/AT4G25880/AT2G45810/AT2G32940/AT5G42950/AT1G73180/AT5G56510/AT2G27880/AT3G60240/AT5G53180/AT5G55550/AT5G45330/AT5G42310/AT2G29190/AT1G22240/AT3G61240/AT1G29550/AT2G24050/AT1G80000/AT2G36660/AT3G01150/AT1G71770/AT1G43190/AT4G00660…	41
GO:0000045	autophagosome assembly	8/6049	10/19652	0.00191179	0.0137301	0.0107107	AT5G66930/AT4G30790/AT3G61710/AT3G19190/AT3G50590/AT3G49590/AT1G54210/AT3G18770	8
GO:0006261	DNA-templated DNA replication	8/6049	10/19652	0.00191179	0.0137301	0.0107107	AT5G63960/AT4G32700/AT3G20540/AT5G22110/AT5G13060/AT1G50840/AT1G67320/AT5G41880	8
GO:0010239	chloroplast mRNA processing	8/6049	10/19652	0.00191179	0.0137301	0.0107107	AT5G27270/AT1G30610/AT2G48120/AT2G04270/AT2G35130/AT5G08720/AT2G41720/AT5G42310	8
GO:0060236	regulation of mitotic spindle organization	8/6049	10/19652	0.00191179	0.0137301	0.0107107	AT1G03780/AT4G22860/AT5G15510/AT4G11990/AT5G05970/AT5G62240/AT3G01015/AT5G07170	8
GO:0006996	organelle organization	10/6049	14/19652	0.00206454	0.0142427	0.0111106	AT2G31970/AT4G30790/AT4G28080/AT3G52140/AT1G63900/AT1G15290/AT1G01320/AT1G59560/AT1G77720/AT1G54150	10
GO:0031349	positive regulation of defense response	10/6049	14/19652	0.00206454	0.0142427	0.0111106	AT1G19100/AT4G24970/AT4G36290/AT5G50780/AT4G36280/AT1G25540/AT1G49540/AT4G08850/AT5G36890/AT5G13130	10
GO:0006415	translational termination	9/6049	12/19652	0.00206512	0.0142427	0.0111106	AT3G62910/AT2G47020/AT5G47880/AT1G18070/AT1G62850/AT3G57190/AT3G13440/AT5G36170/AT1G56350	9
GO:0034765	regulation of monoatomic ion transmembrane transport	9/6049	12/19652	0.00206512	0.0142427	0.0111106	AT4G18290/AT5G37500/AT4G28610/AT4G22200/AT5G46240/AT4G32500/AT2G25600/AT2G26650/AT4G32650	9
GO:0051225	spindle assembly	9/6049	12/19652	0.00206512	0.0142427	0.0111106	AT1G03780/AT3G43610/AT3G44050/AT1G20570/AT5G38880/AT4G05190/AT1G50710/AT5G40740/AT5G48520	9
GO:0048544	recognition of pollen	21/6049	39/19652	0.00225812	0.0154512	0.0120533	AT4G03230/AT1G11280/AT1G61500/AT1G61430/AT1G61490/AT1G61360/AT1G11350/AT1G61370/AT3G49500/AT1G61380/AT1G11410/AT1G61400/AT1G61460/AT1G61420/AT1G11300/AT1G61440/AT1G61550/AT1G11303/AT1G61390/AT4G27300/AT4G21380	21
GO:0045037	protein import into chloroplast stroma	15/6049	25/19652	0.00235137	0.0159636	0.012453	AT1G16540/AT5G22640/AT2G04030/AT3G04340/AT5G64580/AT1G79560/AT3G16290/AT4G23940/AT1G63900/AT5G16620/AT1G06950/AT5G01590/AT3G48870/AT4G02510/AT5G50920	15
GO:0000226	microtubule cytoskeleton organization	23/6049	44/19652	0.00237631	0.0160079	0.0124875	AT1G80260/AT4G26760/AT3G43610/AT2G35880/AT3G53760/AT2G35630/AT2G01910/AT1G20570/AT2G38720/AT1G14690/AT5G51600/AT1G54460/AT4G03260/AT3G60840/AT4G05190/AT5G55230/AT3G04630/AT2G44190/AT5G27930/AT5G17410/AT3G55000/AT5G40740/AT1G27920	23
GO:0035556	intracellular signal transduction	17/6049	30/19652	0.0028646	0.0191487	0.0149376	AT4G04740/AT5G04540/AT3G10550/AT4G38230/AT4G13020/AT5G57565/AT1G69220/AT1G45160/AT5G58690/AT3G06110/AT4G21940/AT3G22190/AT1G71860/AT3G21630/AT2G40116/AT1G10940/AT2G46070	17
GO:0006139	nucleobase-containing compound metabolic process	24/6049	47/19652	0.00289401	0.0191976	0.0149758	AT5G35170/AT1G79950/AT1G20720/AT3G20540/AT5G42540/AT1G54490/AT1G54440/AT4G25280/AT1G50840/AT5G47840/AT1G03190/AT5G35910/AT1G79890/AT2G32415/AT5G24340/AT1G65440/AT1G56310/AT5G18860/AT3G60180/AT1G75660/AT1G12370/AT1G63210/AT3G15620/AT5G01310	24
GO:0005992	trehalose biosynthetic process	13/6049	21/19652	0.00312928	0.0204462	0.0159498	AT1G78580/AT5G65140/AT4G22590/AT1G78090/AT4G12430/AT1G35910/AT1G06410/AT5G51460/AT5G10100/AT2G18700/AT1G60140/AT2G22190/AT1G68020	13
GO:0007033	vacuole organization	13/6049	21/19652	0.00312928	0.0204462	0.0159498	AT2G26890/AT1G77220/AT2G38020/AT4G33240/AT3G14270/AT2G01690/AT5G04920/AT1G17260/AT1G03060/AT4G36630/AT1G15130/AT3G54860/AT2G28390	13
GO:0005983	starch catabolic process	12/6049	19/19652	0.00357195	0.0231644	0.0180702	AT4G09020/AT1G10760/AT5G04360/AT2G39930/AT1G69830/AT3G52180/AT2G40840/AT3G01510/AT4G15210/AT5G26570/AT5G55700/AT5G64860	12
GO:0010468	regulation of gene expression	48/6049	111/19652	0.00365487	0.0235265	0.0183527	AT5G64390/AT1G63490/AT4G32700/AT5G15540/AT5G01270/AT5G61190/AT2G47700/AT3G04450/AT1G67840/AT4G20480/AT1G08030/AT3G07610/AT4G28610/AT3G13040/AT5G47010/AT5G23720/AT5G46190/AT1G08060/AT5G53060/AT3G62200/AT5G05550/AT3G62050/AT3G07780/AT4G25350/AT2G01060/AT5G64710/AT3G52250/AT5G61380/AT2G46830/AT5G09840/AT2G42280/AT3G57670/AT5G29000/AT4G00830/AT4G09180/AT2G20400/AT3G20810/AT1G79430/AT3G04030/AT3G12820…	48
GO:0009845	seed germination	36/6049	79/19652	0.00395327	0.0251064	0.0195852	AT1G66730/AT2G46590/AT3G55850/AT4G03090/AT5G08450/AT5G44280/AT2G36270/AT1G43620/AT5G01930/AT5G57390/AT1G34120/AT5G53180/AT4G21540/AT3G44730/AT3G33520/AT2G32390/AT2G26300/AT4G09140/AT4G32320/AT5G01560/AT5G61780/AT4G21750/AT4G03430/AT4G00050/AT3G25230/AT1G60170/AT4G27490/AT1G30010/AT5G66460/AT4G03560/AT4G18010/AT3G01150/AT5G37260/AT4G04890/AT3G07130/AT1G74360	36
GO:0009556	microsporogenesis	15/6049	26/19652	0.00398677	0.0251064	0.0195852	AT1G34210/AT5G57790/AT5G47690/AT4G31880/AT2G36850/AT1G15940/AT1G31810/AT3G07160/AT1G71830/AT5G18700/AT1G15110/AT1G02065/AT1G77390/AT4G15890/AT2G13680	15
GO:0045892	negative regulation of DNA-templated transcription	74/6049	184/19652	0.00398698	0.0251064	0.0195852	AT3G48710/AT5G02810/AT1G10450/AT5G15020/AT4G32730/AT2G32700/AT1G70060/AT5G63320/AT2G25170/AT5G44180/AT4G14920/AT1G24190/AT3G01320/AT4G21670/AT5G58610/AT4G37460/AT3G02860/AT1G17760/AT5G63550/AT2G46790/AT5G67320/AT4G19190/AT4G26630/AT1G59750/AT1G03770/AT2G27350/AT1G59890/AT5G44280/AT4G06634/AT5G11530/AT1G05380/AT1G43850/AT5G37380/AT4G20400/AT2G34010/AT5G43170/AT5G17690/AT1G28420/AT4G32551/AT2G39810…	74
GO:0071230	cellular response to amino acid stimulus	11/6049	17/19652	0.00403388	0.025219	0.019673	AT1G05200/AT3G51480/AT5G27100/AT3G07520/AT4G35290/AT2G32390/AT1G42540/AT2G17260/AT5G48400/AT2G32400/AT4G31710	11
GO:0006812	monoatomic cation transport	34/6049	74/19652	0.00427166	0.0265148	0.0206838	AT4G00630/AT1G54370/AT5G11800/AT2G47830/AT5G21930/AT3G12100/AT2G19600/AT2G01980/AT4G04850/AT1G79610/AT1G14660/AT1G01790/AT3G05030/AT2G19110/AT3G58810/AT3G51860/AT5G51710/AT5G55470/AT1G51610/AT1G05580/AT4G37270/AT3G44900/AT1G55730/AT5G44790/AT1G08140/AT2G28180/AT1G08150/AT1G08135/AT3G17630/AT2G30240/AT5G27150/AT1G63440/AT5G37060/AT4G30110	34
GO:0001676	long-chain fatty acid metabolic process	10/6049	15/19652	0.00448636	0.0268388	0.0209366	AT1G77590/AT1G64400/AT4G23850/AT1G49430/AT3G05970/AT5G27600/AT2G47240/AT5G37300/AT1G73680/AT2G04350	10
GO:0043488	regulation of mRNA stability	10/6049	15/19652	0.00448636	0.0268388	0.0209366	AT4G11970/AT3G12640/AT1G27960/AT2G24350/AT3G57190/AT1G09810/AT1G79270/AT3G13060/AT1G48110/AT3G17330	10
GO:0048731	system development	10/6049	15/19652	0.00448636	0.0268388	0.0209366	AT1G05830/AT2G31650/AT1G26330/AT3G55400/AT2G46020/AT1G30810/AT1G08620/AT4G20400/AT3G01460/AT2G28290	10
GO:2000024	regulation of leaf development	10/6049	15/19652	0.00448636	0.0268388	0.0209366	AT2G32700/AT5G55390/AT4G32551/AT1G55350/AT3G11220/AT1G49540/AT3G07050/AT5G13680/AT4G00180/AT4G10090	10
GO:0006351	DNA-templated transcription	48/6049	112/19652	0.00451388	0.0268388	0.0209366	AT3G05380/AT1G68990/AT3G61420/AT5G15700/AT3G18090/AT4G11560/AT2G24120/AT1G55750/AT1G29940/AT5G45140/AT5G08130/AT4G21710/AT5G60040/AT5G49530/AT3G21430/AT5G25520/AT3G57660/AT3G49000/AT5G27610/AT2G25640/AT1G60620/ATCG00190/AT3G10490/AT2G22840/AT3G44530/AT3G13960/AT5G11430/AT1G60850/AT4G35800/AT2G40030/AT1G18400/AT3G13940/AT4G40050/AT4G36540/AT4G37740/AT3G03570/AT5G38860/AT4G00050/AT5G06839/AT5G61380…	48
GO:0006402	mRNA catabolic process	17/6049	31/19652	0.00454005	0.0268388	0.0209366	AT5G21160/AT5G14580/AT2G47220/AT4G03110/AT1G54490/AT2G17970/AT1G14710/AT3G13300/AT3G13290/AT5G13570/AT3G03710/AT5G07350/AT5G61780/AT1G80780/AT2G45620/AT1G03457/AT4G36090	17
GO:0009561	megagametogenesis	17/6049	31/19652	0.00454005	0.0268388	0.0209366	AT1G29940/AT5G45140/AT5G57790/AT3G63480/AT4G31610/AT2G04660/AT3G06400/AT5G38970/AT4G14790/AT3G56990/AT3G59550/AT4G14220/AT1G01960/AT3G60360/AT5G40740/AT5G22000/AT2G18080	17
GO:0035194	RNA-mediated post-transcriptional gene silencing	9/6049	13/19652	0.00487673	0.0284421	0.0221873	AT5G01400/AT1G32490/AT3G49500/AT5G13010/AT2G40030/AT5G23880/AT1G73840/AT1G05460/AT1G69440	9
GO:0042026	protein refolding	9/6049	13/19652	0.00487673	0.0284421	0.0221873	AT5G18820/AT1G26230/AT1G55490/AT2G33210/AT1G28210/AT3G13470/AT3G13860/AT2G25140/AT5G15450	9
GO:0009650	UV protection	8/6049	11/19652	0.00511207	0.0292263	0.022799	AT5G16630/AT5G44740/AT3G48900/AT2G34640/AT1G16190/AT3G02540/AT1G12370/AT1G01880	8
GO:0016441	post-transcriptional gene silencing	8/6049	11/19652	0.00511207	0.0292263	0.022799	AT1G76630/AT1G48410/AT3G46960/AT1G17760/AT3G10490/AT5G13570/AT1G70070/AT1G71800	8
GO:0106074	aminoacyl-tRNA metabolism involved in translational fidelity	8/6049	11/19652	0.00511207	0.0292263	0.022799	AT4G04350/AT5G16715/AT5G49030/AT1G14610/AT4G10320/AT2G03800/AT4G18460/AT3G23145	8
GO:0006623	protein targeting to vacuole	16/6049	29/19652	0.00540761	0.0307138	0.0239594	AT3G50380/AT5G24740/AT5G18525/AT4G00800/AT2G26890/AT3G61710/AT1G24460/AT1G48090/AT5G11710/AT1G08190/AT2G32760/AT2G14720/AT2G14740/AT5G16830/AT2G28390/AT5G06140	16
GO:0010020	chloroplast fission	13/6049	22/19652	0.00550748	0.0310779	0.0242434	AT3G29185/AT3G19180/AT5G10490/AT1G75010/AT1G58200/AT4G23940/AT3G19720/AT3G07630/AT5G42480/AT1G63680/AT2G21280/AT5G55280/AT1G20830	13
GO:0000165	MAPK cascade	22/6049	44/19652	0.00590091	0.0330832	0.0258077	AT4G08470/AT1G53510/AT1G08720/AT4G08480/AT2G42880/AT2G01450/AT1G53570/AT3G18040/AT5G19010/AT5G66850/AT1G09000/AT1G54960/AT1G73670/AT1G63700/AT5G40440/AT1G77720/AT3G14720/AT4G36450/AT4G08500/AT3G06030/AT1G07880/AT2G46070	22
GO:0010017	red or far-red light signaling pathway	27/6049	57/19652	0.00623541	0.0347345	0.0270959	AT5G02810/AT3G15354/AT3G22170/AT4G15090/AT2G47700/AT2G25930/AT2G46790/AT2G32950/AT2G34640/AT4G11110/AT4G10180/AT1G53090/AT3G59060/AT1G09530/AT2G43010/AT2G46970/AT4G21100/AT4G26430/AT4G25350/AT2G46340/AT1G22770/AT2G18790/AT3G17609/AT4G16780/AT5G61270/AT3G62090/AT3G13550	27
GO:0016485	protein processing	11/6049	18/19652	0.00750345	0.0415319	0.0323984	AT2G03140/AT1G28320/AT3G26085/AT3G19170/AT1G49630/AT1G14270/AT2G35260/AT5G47040/AT3G59990/AT3G52640/AT4G17840	11
GO:0006400	tRNA modification	14/6049	25/19652	0.00767003	0.0421852	0.0329081	AT5G24670/AT2G32320/AT4G27340/AT3G24560/AT1G78010/AT2G31580/AT4G04670/AT3G56120/AT5G13680/AT1G01760/AT1G72090/AT1G48175/AT5G12410/AT3G02320	14
GO:0051707	response to other organism	24/6049	50/19652	0.00787178	0.0430225	0.0335612	AT3G14150/AT4G19510/AT5G35450/AT1G53350/AT1G58602/AT1G59620/AT3G14470/AT3G13100/AT5G48620/AT1G50180/AT1G10920/AT3G14460/AT1G33560/AT1G59124/AT1G58807/AT3G53160/AT2G04450/AT5G43470/AT1G58848/AT5G45520/AT3G14130/AT3G46730/AT5G55450/AT3G46530	24
GO:0000278	mitotic cell cycle	16/6049	30/19652	0.0083139	0.0448744	0.0350059	AT1G03780/AT5G63920/AT3G43610/AT5G01450/AT2G32900/AT2G20190/AT2G47980/AT2G38185/AT4G21820/AT1G20570/AT3G57060/AT3G59550/AT1G09450/AT5G40840/AT5G35520/AT4G15890	16
GO:0072583	clathrin-dependent endocytosis	16/6049	30/19652	0.0083139	0.0448744	0.0350059	AT4G12780/AT3G07960/AT4G12770/AT1G59610/AT5G22770/AT5G35200/AT5G22780/AT1G03050/AT1G14910/AT4G34660/AT3G11130/AT4G02650/AT1G25240/AT2G01600/AT5G24710/AT5G57200	16
GO:0044030	regulation of DNA methylation	10/6049	16/19652	0.00867894	0.0465555	0.0363173	AT3G06290/AT5G11470/AT5G55390/AT4G24970/AT1G54440/AT1G28060/AT3G14980/AT4G20400/AT1G49540/AT1G09320	10

## Sheet: PIF4ox DOWN
ID	Description	GeneRatio	BgRatio	pvalue	p.adjust	qvalue	geneID	Count
GO:0006412	translation	348/6590	681/19652	5.65833e-22	4.90577e-19	4.15143e-19	AT5G60390/AT1G57720/AT3G13920/AT1G07930/AT3G27850/AT1G56070/AT3G49910/AT4G15000/AT1G70600/AT4G31700/AT5G17870/AT1G75350/AT1G61580/AT2G18020/AT2G47110/AT3G22230/AT5G40950/AT3G54210/AT5G19510/AT4G34670/AT4G34620/AT3G27830/AT2G09990/AT1G07940/AT1G09640/AT4G36130/AT1G26630/AT5G18380/AT3G05590/AT2G37190/AT3G62250/AT3G03600/AT2G37270/AT1G07920/AT1G74970/AT1G04270/AT3G53430/AT2G24090/AT1G30230/AT5G56940…	348
GO:0015979	photosynthesis	116/6590	167/19652	1.95887e-21	8.4917e-19	7.18596e-19	AT4G09650/AT1G29930/AT5G66570/AT3G54110/AT1G67090/AT5G38410/AT1G74470/AT5G47110/AT1G55670/AT3G21055/AT2G05100/AT3G56090/AT4G10340/AT2G06520/AT1G79040/AT3G02780/AT4G02770/AT2G30570/AT1G53310/AT1G67740/AT1G29920/AT5G01530/AT4G12800/AT5G16440/AT1G44575/AT2G05070/AT3G27690/AT1G52230/AT1G61520/AT5G54270/AT2G20890/AT1G29910/AT2G40300/AT1G31330/AT5G38420/AT1G15820/AT3G08940/AT4G28660/AT4G21280/AT3G56940…	116
GO:0009409	response to cold	184/6590	332/19652	1.33347e-16	3.85374e-14	3.26116e-14	AT2G26250/AT5G38480/AT2G01570/AT4G34710/AT1G56070/AT3G47520/AT4G09650/AT5G12250/AT3G17020/AT2G36530/AT4G24960/AT4G39730/AT3G17390/AT5G54770/AT1G67090/AT1G53240/AT2G16280/AT5G15090/AT2G05100/AT4G38840/AT5G37770/AT4G38680/AT2G17840/AT3G05880/AT5G57560/AT3G23000/AT5G58070/AT5G10450/AT5G65020/AT1G35720/AT2G33800/AT1G68530/AT3G52150/AT3G12780/AT1G05140/AT5G38470/AT1G03680/AT1G49245/AT5G04530/AT2G40880…	184
GO:0071456	cellular response to hypoxia	138/6590	231/19652	2.29951e-16	4.9842e-14	4.21779e-14	AT4G30440/AT1G09070/AT5G57560/AT4G27280/AT5G58070/AT2G22500/AT5G06320/AT2G36460/AT1G66080/AT3G56880/AT1G76680/AT3G15210/AT5G20230/AT1G72430/AT3G55980/AT2G47730/AT1G63090/AT1G73500/AT5G64260/AT5G45630/AT3G03270/AT4G24570/AT3G13310/AT5G42200/AT5G54960/AT3G50440/AT5G54940/AT1G32928/AT1G13360/AT1G67360/AT5G24590/AT1G03220/AT1G77120/AT3G52800/AT1G43800/AT3G05120/AT1G25560/AT5G13190/AT2G40140/AT2G01150…	138
GO:0022900	electron transport chain	63/6590	93/19652	1.5524e-11	2.69186e-09	2.27795e-09	AT1G60950/AT4G12880/AT5G13440/AT5G13430/AT5G08530/AT1G76100/AT5G11770/AT1G20340/AT5G40810/AT4G31840/AT4G02580/AT5G20230/AT1G10960/AT3G27240/AT5G67590/AT1G72230/AT4G10040/AT5G15350/AT5G17770/AT2G02850/AT2G27510/AT2G02510/AT2G25060/AT4G30590/AT1G79010/AT5G18400/AT5G25090/AT4G32210/AT1G16700/AT5G09600/AT5G40650/AT1G22840/AT1G14450/AT3G27380/AT3G27200/AT4G27520/AT1G64640/ATMG01360/AT3G01070/ATMG00160…	63
GO:0009853	photorespiration	39/6590	53/19652	2.8296e-09	4.08877e-07	3.46006e-07	AT1G47260/AT3G54110/AT1G67090/AT5G38410/AT3G48680/AT5G37510/AT1G49140/AT4G16450/AT5G63510/AT5G66510/AT2G33220/AT1G79870/AT5G52840/AT4G34700/AT2G27730/AT5G38420/AT4G00585/AT1G67350/AT3G18410/AT2G02050/AT1G68010/AT1G04630/AT1G19580/AT1G23310/AT5G47435/AT2G47690/AT1G12550/AT4G39660/AT2G31490/AT1G14450/ATCG00490/AT3G12290/AT2G13360/AT5G38430/AT3G14420/AT4G00620/AT5G60335/AT3G14415/AT4G18360	39
GO:0006979	response to oxidative stress	136/6590	268/19652	3.76239e-09	4.65998e-07	3.94343e-07	AT4G21960/AT3G49120/AT4G34710/AT4G11600/AT3G04120/AT2G28190/AT1G08830/AT5G13930/AT1G07890/AT5G24770/AT1G44970/AT3G17070/AT5G01410/AT1G75280/AT3G06050/AT1G45145/AT1G78380/AT1G27330/AT4G11290/AT5G20230/AT2G40880/AT2G39460/AT2G19310/AT5G51890/AT1G27350/AT5G54500/AT4G20830/AT5G26030/AT4G21860/AT5G07460/AT1G71695/AT3G53260/AT2G24150/AT1G52760/AT3G60980/AT5G54810/AT2G37040/AT4G35000/AT3G49110/AT2G16500…	136
GO:0009644	response to high light intensity	34/6590	45/19652	9.49234e-09	1.02334e-06	8.65981e-07	AT3G18780/AT2G47450/AT2G05100/AT2G17840/AT5G58070/AT2G39460/AT2G05070/AT3G27690/AT1G61520/AT5G54270/AT2G05620/AT5G61510/AT3G55280/AT3G61470/AT3G47470/AT3G54890/AT4G34190/AT5G02120/AT4G17490/AT5G61230/AT1G01470/AT1G55480/AT1G45474/AT3G28910/AT2G42540/AT1G27730/AT2G41430/AT1G77510/AT3G47860/AT4G08920/AT5G04410/AT4G32770/AT1G32070/AT1G17420	34
GO:0006631	fatty acid metabolic process	85/6590	152/19652	1.0981e-08	1.02334e-06	8.65981e-07	AT3G12120/AT2G43710/AT2G33150/AT1G54630/AT4G14440/AT2G45970/AT1G65290/AT1G67730/AT5G42650/AT3G55360/AT3G12800/AT3G15730/AT1G76680/AT3G15850/AT2G44620/AT4G30950/AT3G05020/AT5G10480/AT5G43280/AT1G63710/AT1G54580/AT1G24360/AT1G65520/AT1G06350/AT4G00360/AT3G02630/AT4G14430/AT3G06860/AT5G46290/AT4G25050/AT1G01600/AT4G05530/AT5G16240/AT1G43800/AT3G48530/AT5G16370/AT5G16340/AT2G06050/AT2G31360/AT3G16910…	85
GO:0006633	fatty acid biosynthetic process	71/6590	121/19652	1.18032e-08	1.02334e-06	8.65981e-07	AT2G26250/AT3G12120/AT2G43710/AT1G30120/AT2G33150/AT1G54630/AT2G16280/AT2G15090/AT1G68530/AT1G11600/AT1G65290/AT1G67730/AT1G10670/AT5G42650/AT3G55360/AT1G76680/AT5G04530/AT3G15850/AT2G44620/AT4G30950/AT1G07720/AT3G05020/AT5G10480/AT2G26640/AT1G54580/AT1G24360/AT1G06350/AT3G02630/AT5G10160/AT2G22230/AT5G46290/AT4G25050/AT1G19440/AT5G16240/AT1G43800/AT2G28630/AT3G48530/AT2G06050/AT2G31360/AT5G51830…	71
GO:0051603	proteolysis involved in protein catabolic process	27/6590	33/19652	1.60048e-08	1.26147e-06	1.0675e-06	AT3G27430/AT3G51260/AT1G56450/AT5G60360/AT3G22110/AT4G31300/AT4G14800/AT1G21720/AT1G13060/AT2G27020/AT5G42790/AT5G40580/AT3G14290/AT3G60820/AT2G05840/AT1G47250/AT3G22630/AT1G79210/AT1G16470/AT3G26340/AT1G53850/AT1G77440/AT5G51740/AT5G35590/AT5G66140/AT3G20210/AT1G77000	27
GO:0009765	photosynthesis, light harvesting	20/6590	22/19652	3.40179e-08	2.45779e-06	2.07986e-06	AT1G29930/AT2G05100/AT4G10340/AT1G29920/AT5G01530/AT2G05070/AT3G27690/AT1G61520/AT5G54270/AT1G29910/AT1G15820/AT3G08940/AT2G21970/AT3G61470/AT3G47470/AT2G34430/AT3G54890/AT2G40100/AT1G45474/AT1G19150	20
GO:0006099	tricarboxylic acid cycle	41/6590	60/19652	3.74381e-08	2.49683e-06	2.1129e-06	AT1G04410/AT3G47520/AT2G46505/AT5G58330/AT1G53240/AT1G65930/AT3G58750/AT2G20420/AT1G08480/AT3G47833/AT1G53310/AT1G10670/AT1G47420/AT4G35260/AT5G08300/AT5G03290/AT5G62575/AT5G49460/AT4G32210/AT2G22780/AT5G43330/AT2G46390/AT5G09600/AT3G15020/AT2G17130/AT5G40650/AT5G51040/AT1G09430/AT3G27380/AT4G26910/AT3G09810/AT5G23250/AT5G09660/AT2G44350/AT1G60810/AT5G50950/AT2G42790/AT5G56720/AT5G55070/AT2G42600…	41
GO:0019253	reductive pentose-phosphate cycle	19/6590	21/19652	9.26114e-08	5.73529e-06	4.8534e-06	AT1G67090/AT5G38410/AT3G04790/AT1G56190/AT3G12780/AT1G12900/AT2G47400/AT3G62410/AT5G38420/AT2G21170/AT1G42970/AT3G26650/ATCG00490/AT5G38430/AT3G54050/AT3G60750/AT3G55800/AT5G61410/AT1G76560	19
GO:0009414	response to water deprivation	153/6590	330/19652	7.56481e-07	4.37246e-05	3.70012e-05	AT5G59320/AT1G05850/AT2G38530/AT1G52400/AT5G67300/AT5G59310/AT3G46320/AT4G24960/AT4G39730/AT4G00430/AT5G47120/AT3G53420/AT1G69700/AT1G15690/AT4G38680/AT1G74920/AT2G17840/AT2G45960/AT3G45930/AT5G58070/AT1G01620/AT5G65020/AT1G35720/AT3G52150/AT1G12110/AT5G13780/AT5G59690/AT2G40880/AT3G53730/AT3G61430/AT1G07820/AT3G12630/AT2G38750/AT3G18490/AT5G56030/AT2G26740/AT5G59550/AT2G37760/AT5G59970/AT4G36020…	153
GO:0009611	response to wounding	101/6590	202/19652	8.91516e-07	4.8309e-05	4.08807e-05	AT5G09810/AT4G34710/AT3G16470/AT5G13930/AT2G34810/AT2G33150/AT4G24220/AT5G24770/AT1G74020/AT5G12140/AT1G26630/AT1G51760/AT5G06320/AT5G42650/AT1G76680/AT1G32920/AT3G44260/AT1G73500/AT3G17800/AT2G02990/AT3G48520/AT5G54640/AT2G21970/AT4G02380/AT2G39940/AT3G51450/AT5G10300/AT1G74930/AT3G50020/AT4G11280/AT4G34190/AT2G26690/AT2G27690/AT1G01720/AT3G11480/AT4G16760/AT3G43670/AT1G01470/AT5G54170/AT2G30020…	101
GO:0009631	cold acclimation	35/6590	53/19652	1.30941e-06	6.37186e-05	5.39208e-05	AT5G38480/AT1G56070/AT4G38680/AT2G15970/AT4G24770/AT5G67590/AT3G53460/AT4G36020/AT5G15960/AT1G18740/AT5G49510/AT1G11760/AT1G29390/AT4G04800/AT5G23290/AT5G58220/AT4G13850/AT4G31420/AT4G15910/AT2G42540/AT2G24500/AT1G20450/AT3G14080/AT5G50950/AT3G50970/AT1G29395/AT4G29810/AT4G25470/AT5G59820/AT2G17870/AT2G42530/AT1G19120/AT1G28520/AT1G20440/AT2G03740	35
GO:0010043	response to zinc ion	31/6590	45/19652	1.32288e-06	6.37186e-05	5.39208e-05	AT1G04410/AT1G57720/AT1G19570/AT3G55440/AT4G38220/AT1G21750/AT1G65930/AT3G09200/AT3G14310/AT2G30860/AT3G07720/AT4G31300/AT2G23150/AT2G32520/AT3G10920/AT2G01520/AT1G52760/AT2G46800/AT5G03630/AT4G35040/AT5G01600/AT2G21660/AT1G16470/AT2G16770/AT4G31510/AT3G02570/AT5G21940/AT5G35590/AT5G17920/AT1G67070/AT4G33020	31
GO:0006833	water transport	19/6590	23/19652	1.8215e-06	8.31179e-05	7.03371e-05	AT2G36830/AT3G54820/AT3G16240/AT2G39010/AT4G00430/AT4G35100/AT3G53420/AT2G45960/AT1G01620/AT2G16850/AT3G26520/AT3G61430/AT4G23400/AT3G04090/AT5G18290/AT2G37180/AT2G37170/AT4G01470/AT5G60660	19
GO:0015031	protein transport	262/6590	620/19652	2.5947e-06	0.00011248	9.51843e-05	AT5G09810/AT2G34250/AT2G03820/AT1G29310/AT4G02080/AT1G27310/AT5G17190/AT3G09840/AT2G30050/AT1G07140/AT1G48440/AT3G22845/AT1G56330/AT1G29330/AT3G07560/AT2G37410/AT5G20010/AT2G47840/AT1G29260/AT1G27970/AT2G17980/AT3G03160/AT1G27330/AT3G59500/AT3G07410/AT1G16920/AT1G04070/AT1G02130/AT2G45070/AT5G28750/AT3G62290/AT3G62560/AT1G70490/AT4G24920/AT1G10630/AT5G55190/AT1G27350/AT1G57620/AT5G45750/AT1G72750…	262
GO:0006096	glycolytic process	43/6590	71/19652	2.74063e-06	0.000113149	9.57503e-05	AT1G13440/AT3G55440/AT3G04120/AT3G52930/AT2G01140/AT2G36530/AT1G30120/AT5G08570/AT1G59900/AT4G38970/AT4G29130/AT1G01090/AT1G79550/AT2G36460/AT1G56190/AT3G12780/AT2G34590/AT5G63680/AT3G22960/AT2G21330/AT1G09780/AT1G34430/AT2G21170/AT5G42740/AT3G08590/AT5G56350/AT5G50850/AT1G24180/AT1G20950/AT5G52920/AT2G19860/AT3G25860/AT3G52990/AT1G79530/AT1G12000/AT1G74030/AT5G47810/AT2G36580/AT1G47840/AT1G22170…	43
GO:0006629	lipid metabolic process	231/6590	541/19652	4.18328e-06	0.000162145	0.000137212	AT3G61580/AT1G11910/AT3G12120/AT3G04290/AT1G54020/AT2G43710/AT1G11680/AT1G20050/AT2G33150/AT1G54630/AT3G47350/AT2G42990/AT5G59500/AT4G14440/AT3G14220/AT1G76090/AT1G43580/AT5G58070/AT1G14290/AT4G39800/AT1G65290/AT1G67730/AT1G10670/AT4G00400/AT5G42650/AT3G55360/AT3G12800/AT3G15730/AT1G76680/AT3G51730/AT2G03980/AT2G34490/AT3G15850/AT2G44620/AT4G30950/AT2G42690/AT3G05020/AT5G10480/AT1G71691/AT5G43280…	231
GO:0043086	negative regulation of catalytic activity	23/6590	31/19652	4.30141e-06	0.000162145	0.000137212	AT5G64620/AT1G03680/AT1G11362/AT3G17130/AT4G25260/AT3G15360/AT1G50325/AT3G55680/AT3G17230/AT3G17227/AT1G47960/AT3G02730/AT4G15750/AT1G11593/AT2G31425/AT3G17152/AT1G48010/AT5G24370/AT3G17150/AT3G17225/AT1G56100/AT2G31430/AT3G17220	23
GO:0015986	proton motive force-driven ATP synthesis	25/6590	35/19652	5.11676e-06	0.000184843	0.00015642	AT4G09650/AT5G08690/AT5G47030/AT2G33040/AT1G51650/AT5G13450/AT1G78900/AT4G00895/AT4G04640/AT3G52300/AT4G29480/AT5G08670/AT4G26210/AT2G19680/AT3G01390/ATCG00470/ATMG01170/ATCG00480/ATCG00150/AT5G08680/ATCG00140/ATMG00040/AT2G07671/AT2G07698/AT2G21410	25
GO:0007017	microtubule-based process	21/6590	28/19652	8.58237e-06	0.000287906	0.000243635	AT5G44340/AT5G62700/AT5G62690/AT5G12250/AT2G29550/AT4G14960/AT1G04820/AT4G20890/AT5G23860/AT5G19770/AT5G19780/AT1G50010/AT1G23220/AT1G20010/AT1G52245/AT4G15930/AT1G64740/AT3G16120/AT3G61650/AT1G75780/AT4G27360	21
GO:0008652	amino acid biosynthetic process	80/6590	159/19652	8.63385e-06	0.000287906	0.000243635	AT1G22410/AT3G13110/AT4G34200/AT2G17265/AT1G62180/AT3G20390/AT1G80600/AT1G75500/AT4G38800/AT1G17745/AT4G04610/AT2G43090/AT3G48560/AT2G17630/AT4G21990/AT4G29840/AT3G44720/AT4G14880/AT3G57560/AT3G58610/AT4G33510/AT4G35630/AT2G43750/AT5G22630/AT2G37250/AT5G54810/AT3G59760/AT1G15710/AT5G56760/AT2G27820/AT2G45440/AT3G53580/AT5G10920/AT3G61440/AT1G75330/AT4G24830/AT4G27070/AT1G48860/AT1G49820/AT2G04400…	80
GO:0009873	ethylene-activated signaling pathway	89/6590	181/19652	9.12196e-06	0.000292916	0.000247876	AT1G75950/AT1G05850/AT5G38480/AT5G42190/AT2G25490/AT3G16770/AT3G15730/AT3G15210/AT1G72430/AT1G01250/AT5G25350/AT3G25890/AT1G53910/AT1G73500/AT4G17500/AT2G46310/AT2G44840/AT3G46060/AT2G44940/AT5G67190/AT1G53170/AT4G11140/AT1G25560/AT1G71130/AT1G25490/AT5G47230/AT2G23340/AT1G74930/AT3G20770/AT1G22190/AT5G21960/AT4G17490/AT5G44210/AT4G36900/AT4G27950/AT3G62980/AT5G07580/AT3G60490/AT3G52430/AT1G28370…	89
GO:0009768	photosynthesis, light harvesting in photosystem I	10/6590	10/19652	1.78984e-05	0.000554211	0.000468992	AT2G05100/AT2G05070/AT3G27690/AT1G61520/AT1G08380/AT3G61470/AT3G47470/AT3G54890/AT1G45474/AT1G19150	10
GO:0042761	very long-chain fatty acid biosynthetic process	15/6590	18/19652	1.9929e-05	0.000595808	0.000504193	AT5G47120/AT1G43580/AT1G67730/AT4G24510/AT5G10480/AT2G31360/AT2G32720/AT1G01120/AT3G28910/AT1G06080/AT3G25540/AT3G23840/AT4G36830/AT1G13580/AT3G06470	15
GO:0046686	response to cadmium ion	37/6590	62/19652	2.14971e-05	0.000621267	0.000525737	AT1G13440/AT1G68560/AT1G44810/AT1G59900/AT4G23670/AT5G35630/AT3G09200/AT4G14880/AT1G48030/AT2G30860/AT4G14800/AT1G52760/AT4G04460/AT3G56240/AT5G26220/AT3G22890/AT1G17290/AT4G14030/ATCG00490/AT4G02930/AT1G23190/AT4G31510/AT3G02570/AT5G11200/AT2G24550/AT5G24890/AT1G75040/AT1G74910/AT1G36370/AT5G64250/AT5G44070/AT4G25100/AT5G11170/AT1G02930/AT4G21680/AT3G14930/AT1G67070	37
GO:0009753	response to jasmonic acid	74/6590	148/19652	2.43063e-05	0.000679791	0.000575262	AT1G75950/AT1G19570/AT4G34710/AT5G67300/AT3G16470/AT5G42190/AT5G13930/AT5G24780/AT2G34810/AT4G26850/AT5G24770/AT1G74020/AT3G16770/AT1G54040/AT5G42650/AT1G44350/AT1G10230/AT5G67160/AT5G20570/AT2G39770/AT5G09980/AT2G39940/AT3G51450/AT1G20140/AT4G11280/AT2G26690/AT3G43670/AT5G07010/AT1G22885/AT1G51360/AT5G13220/AT4G14110/AT3G51420/AT4G23600/AT2G28400/AT3G51430/AT5G56980/AT1G12160/AT4G19810/AT2G34600…	74
GO:0042546	cell wall biogenesis	35/6590	58/19652	2.5534e-05	0.000691812	0.000585434	AT5G57560/AT3G23730/AT2G03220/AT4G03210/AT2G06850/AT5G45750/AT5G44670/AT1G01050/AT4G37800/AT5G65730/AT3G48580/AT1G11545/AT4G18800/AT4G14130/AT5G61840/AT1G06400/AT5G59150/AT2G36870/AT2G01850/AT1G14720/AT4G39990/AT5G65270/AT1G07410/AT4G30270/AT2G33570/AT3G15060/AT4G00740/AT4G20170/AT2G14620/AT1G02730/AT1G14080/AT4G30280/AT3G25050/AT1G74420/AT2G03210	35
GO:0016192	vesicle-mediated transport	112/6590	245/19652	4.58924e-05	0.00117492	0.000994258	AT4G02080/AT5G17190/AT2G30050/AT1G04260/AT3G56110/AT1G48440/AT3G22845/AT3G13720/AT1G56330/AT1G29330/AT3G15480/AT2G40380/AT2G17980/AT3G03160/AT1G02130/AT3G62290/AT3G62560/AT1G70490/AT1G10630/AT1G57620/AT1G23490/AT2G38360/AT1G30630/AT3G56190/AT1G47830/AT5G42570/AT1G04750/AT3G01340/AT1G21900/AT2G44610/AT1G08770/AT3G07680/AT5G54750/AT3G25040/AT3G17780/AT2G39805/AT3G11730/AT4G08520/AT1G69460/AT1G15370…	112
GO:0009741	response to brassinosteroid	26/6590	40/19652	4.60754e-05	0.00117492	0.000994258	AT3G61460/AT5G57560/AT3G16570/AT4G08950/AT4G34760/AT1G75750/AT4G38860/AT1G18740/AT4G31910/AT5G58220/AT4G36110/AT2G21220/AT1G17560/AT2G26710/AT3G46290/AT5G18010/AT2G44080/AT4G39070/AT5G39860/AT1G13260/AT5G54380/AT1G30570/AT4G02330/AT5G26230/AT2G40530/AT3G51550	26
GO:0009416	response to light stimulus	68/6590	136/19652	5.08869e-05	0.00126054	0.00106671	AT2G26250/AT4G38740/AT3G49120/AT5G09810/AT2G36530/AT2G16280/AT2G05100/AT1G31580/AT5G58070/AT1G68530/AT1G79550/AT5G04530/AT2G05070/AT1G07720/AT3G27690/AT2G26640/AT3G62410/AT3G60530/AT1G62480/AT5G07470/AT4G25050/AT3G49110/AT1G43560/AT4G25130/AT2G31090/AT1G26945/AT4G02380/AT4G36240/AT1G42970/AT3G20060/AT2G37678/AT1G01120/AT3G26650/AT4G01900/AT1G20090/AT1G37130/AT1G22500/AT3G02570/AT1G55480/AT4G14110…	68
GO:0006457	protein folding	65/6590	130/19652	7.36952e-05	0.00177483	0.00150192	AT4G38740/AT5G42980/AT5G02500/AT3G18190/AT4G34870/AT3G44110/AT5G07960/AT1G14980/AT5G56010/AT1G49245/AT2G21130/AT3G11830/AT5G56030/AT5G26360/AT2G29960/AT5G20890/AT2G16600/AT3G56070/AT4G34960/AT3G62030/AT4G35450/AT3G09440/AT5G02490/AT5G22060/AT1G76180/AT5G17710/AT5G20720/AT5G49510/AT5G58710/AT3G60210/AT5G56000/AT1G24510/AT3G47940/AT5G23290/AT1G23100/AT3G03960/AT3G08910/AT1G29990/AT4G26780/AT2G36130…	65
GO:1902600	proton transmembrane transport	69/6590	140/19652	8.0188e-05	0.001879	0.00159007	AT3G58730/AT4G38920/AT4G09650/AT5G08690/AT5G13440/AT5G13430/AT1G75630/AT2G16510/AT5G47030/AT3G42050/AT4G34720/AT3G54110/AT2G33040/AT1G15690/AT3G18830/AT1G51650/AT2G22500/AT1G19910/AT1G12840/AT5G13450/AT1G78900/AT4G26710/AT2G25610/AT4G00895/AT4G36670/AT4G04640/AT3G52300/AT4G29480/AT4G02620/AT3G28710/AT5G08670/AT5G55290/AT2G21870/AT4G11150/AT3G28715/AT4G26210/AT2G19680/AT2G20780/AT4G30190/AT3G01390…	69
GO:0006511	ubiquitin-dependent protein catabolic process	73/6590	150/19652	8.51414e-05	0.00194257	0.00164387	AT1G75950/AT5G41700/AT4G05050/AT5G42190/AT2G25490/AT4G05320/AT2G47110/AT5G53300/AT5G20620/AT3G51260/AT1G64230/AT4G02890/AT3G22110/AT5G03240/AT1G14400/AT1G10230/AT5G25350/AT1G76920/AT5G20570/AT3G55380/AT2G35635/AT2G27020/AT5G42790/AT2G23780/AT3G14290/AT3G63000/AT4G38630/AT2G05840/AT1G47250/AT3G08690/AT1G16890/AT1G79210/AT5G50870/AT1G20140/AT2G02760/AT3G20060/AT4G15420/AT1G16470/AT4G17510/AT2G47970…	73
GO:0009269	response to desiccation	13/6590	16/19652	0.00012361	0.00274795	0.0023254	AT2G05100/AT4G38680/AT2G44060/AT3G44380/AT2G05070/AT3G27690/AT2G33380/AT1G76180/AT2G46140/AT1G01470/AT1G44170/AT1G05260/AT2G05520	13
GO:0016126	sterol biosynthetic process	25/6590	40/19652	0.000164781	0.00357163	0.00302243	AT1G11680/AT1G20050/AT1G76090/AT2G34490/AT4G12110/AT1G20330/AT1G50430/AT3G02580/AT1G58440/AT1G10030/AT2G17370/AT5G13710/AT4G22755/AT2G38700/AT4G34640/AT5G47770/AT4G22756/AT3G52940/AT4G11820/AT4G37760/AT5G50375/AT5G24150/AT5G24155/AT1G07420/AT4G17190	25
GO:0042631	cellular response to water deprivation	24/6590	38/19652	0.000175826	0.00371807	0.00314635	AT5G12140/AT2G05100/AT2G15970/AT1G78380/AT2G05070/AT3G27690/AT5G21010/AT1G68010/AT3G06190/AT4G02380/AT1G64660/AT3G28270/AT5G19000/AT1G79410/AT1G09340/AT1G29395/AT2G43350/AT3G03740/AT1G05680/AT3G53600/AT3G14320/AT1G16370/AT5G18320/AT3G20660	24
GO:0006754	ATP biosynthetic process	16/6590	22/19652	0.000196748	0.00406145	0.00343693	AT4G09650/AT5G08690/AT5G47030/AT2G33040/AT1G51650/AT5G13450/AT4G00895/AT4G04640/AT5G08670/ATCG00470/ATMG01170/ATCG00480/ATCG00150/AT5G08680/ATCG00140/AT2G07698	16
GO:0009636	response to toxic substance	37/6590	67/19652	0.000209389	0.00422186	0.00357268	AT1G19570/AT3G20390/AT1G78370/AT1G78380/AT2G30860/AT1G27130/AT1G75270/AT4G01070/AT2G47730/AT1G10370/AT2G37760/AT2G30870/AT1G59700/AT2G29450/AT4G15480/AT2G29440/AT1G17190/AT5G39050/AT5G02790/AT3G21560/AT3G23560/AT5G17220/AT4G29210/AT3G29670/AT4G15550/AT5G41210/AT2G37770/AT1G59870/AT1G17170/AT1G78320/AT5G16710/AT1G02930/AT1G02940/AT3G43800/AT1G02950/AT2G29420/AT2G02390	37
GO:0043085	positive regulation of catalytic activity	12/6590	15/19652	0.000302369	0.00595805	0.0050419	AT2G31440/AT4G03520/AT2G34470/AT1G03680/AT1G50320/AT1G43560/AT3G15360/AT5G16400/AT3G51030/AT3G02730/AT2G15570/AT1G76760	12
GO:0006949	syncytium formation	9/6590	10/19652	0.000373147	0.00673996	0.00570358	AT2G28950/AT4G28250/AT2G40610/AT2G03090/AT2G39700/AT1G69530/AT2G37640/AT1G26770/AT3G55500	9
GO:0009612	response to mechanical stimulus	9/6590	10/19652	0.000373147	0.00673996	0.00570358	AT5G37780/AT5G37770/AT5G57560/AT2G06850/AT1G54990/AT2G20990/AT4G11280/AT5G61210/AT2G41100	9
GO:0009645	response to low light intensity stimulus	9/6590	10/19652	0.000373147	0.00673996	0.00570358	AT2G05100/AT2G05070/AT3G27690/AT1G61520/AT2G06850/AT3G61470/AT3G47470/AT3G54890/AT1G45474	9
GO:0045039	protein insertion into mitochondrial inner membrane	9/6590	10/19652	0.000373147	0.00673996	0.00570358	AT2G37410/AT5G24650/AT3G25120/AT2G42210/AT4G26670/AT3G49560/AT3G10110/AT5G55510/AT2G29530	9
GO:0071806	protein transmembrane transport	14/6590	19/19652	0.000406043	0.00718447	0.00607974	AT1G17530/AT1G04070/AT4G24920/AT1G27390/AT5G50460/AT5G43970/AT3G27080/AT4G14870/AT3G48570/AT4G38490/AT5G05000/AT1G02280/AT5G40930/AT2G01110	14
GO:0009699	phenylpropanoid biosynthetic process	26/6590	44/19652	0.000441843	0.00766156	0.00648346	AT1G07890/AT4G39330/AT2G40890/AT4G23690/AT3G13662/AT1G55210/AT3G13650/AT4G37980/AT3G53260/AT4G34050/AT4G38700/AT1G58170/AT4G34230/AT1G15950/AT3G19450/AT4G36220/AT1G65870/AT3G13610/AT4G11190/AT1G72680/AT3G13660/AT1G22900/AT1G80820/AT3G24503/AT2G21730/AT2G21890	26
GO:0009617	response to bacterium	58/6590	120/19652	0.000539981	0.00917968	0.00776815	AT5G67500/AT2G17265/AT4G23630/AT5G15090/AT1G26630/AT1G31580/AT5G06320/AT3G14310/AT3G01280/AT2G23150/AT4G37980/AT5G67160/AT2G03440/AT5G45630/AT1G29640/AT1G64090/AT1G80460/AT5G11630/AT5G57490/AT5G10380/AT5G54640/AT4G00860/AT5G02490/AT1G62660/AT1G11580/AT5G03350/AT5G01600/AT1G22885/AT3G10260/AT3G52430/AT3G28910/AT5G24530/AT2G28400/AT5G56980/AT3G12580/AT4G18980/AT2G22330/AT2G41430/AT1G65490/AT4G18760…	58
GO:0042538	hyperosmotic salinity response	28/6590	49/19652	0.000576553	0.00952125	0.0080572	AT4G24960/AT3G04290/AT1G69700/AT3G05880/AT5G58070/AT5G01410/AT1G16920/AT5G49480/AT4G30960/AT3G18030/AT1G74520/AT2G37570/AT4G30996/AT5G62490/AT5G50720/AT2G41130/AT4G23600/AT1G05260/AT3G14080/AT5G59820/AT5G46830/AT1G19120/AT5G52310/AT5G49720/AT5G65010/AT1G48605/AT5G46180/AT5G46050	28
GO:0009744	response to sucrose	38/6590	72/19652	0.000582037	0.00952125	0.0080572	AT3G04120/AT2G47400/AT1G69780/AT3G62410/AT2G24150/AT1G62480/AT1G20840/AT1G74670/AT5G42890/AT4G38630/AT2G39990/AT5G20700/AT5G20270/AT1G77120/AT5G41670/AT1G42970/AT1G10840/AT5G61230/AT4G34590/AT3G26650/AT4G01900/AT1G22160/AT5G47060/AT4G37680/AT1G20950/AT4G17670/AT3G22550/AT5G20830/AT5G47390/AT2G28900/AT3G12700/AT5G08790/AT4G38320/AT1G53885/AT5G65420/AT1G67070/AT4G37220/AT3G06850	38
GO:0006865	amino acid transport	34/6590	63/19652	0.000656975	0.0105481	0.00892615	AT1G17120/AT1G80510/AT2G21050/AT1G58360/AT4G25760/AT3G30390/AT5G65990/AT1G25530/AT5G57685/AT4G31730/AT5G63850/AT1G77690/AT2G38120/AT5G49630/AT1G47670/AT1G44800/AT2G24762/AT2G42005/AT1G24400/AT3G55740/AT3G56200/AT2G39890/AT1G10010/AT5G09220/AT2G34960/AT5G15240/AT1G44100/AT3G11900/AT5G24920/AT1G71680/AT2G01170/AT4G21120/AT5G01240/AT5G40780	34
GO:0008643	carbohydrate transport	62/6590	131/19652	0.000711406	0.0110918	0.00938623	AT5G50790/AT2G25520/AT1G76670/AT5G11230/AT4G32390/AT1G21460/AT3G18830/AT1G77610/AT3G19930/AT4G02050/AT5G46110/AT1G22710/AT3G28007/AT4G36670/AT5G65000/AT5G54800/AT4G21480/AT1G21070/AT5G40260/AT3G14770/AT1G20840/AT4G23010/AT1G71890/AT5G17630/AT5G19980/AT1G76340/AT2G20780/AT4G31600/AT1G11260/AT5G42420/AT3G47420/AT2G48020/AT5G53190/AT5G26340/AT3G05960/AT1G50310/AT2G39060/AT5G25400/AT5G61520/AT5G17010…	62
GO:0000387	spliceosomal snRNP assembly	11/6590	14/19652	0.000729217	0.0110918	0.00938623	AT3G11500/AT1G76300/AT2G18740/AT4G02840/AT1G20580/AT5G62290/AT2G23930/AT4G30220/AT3G07590/AT4G03120/AT4G30330	11
GO:0006596	polyamine biosynthetic process	11/6590	14/19652	0.000729217	0.0110918	0.00938623	AT4G34710/AT3G02470/AT1G23820/AT2G16500/AT5G53120/AT1G70310/AT5G15950/AT2G27450/AT5G18930/AT5G08170/AT5G19530	11
GO:0006888	endoplasmic reticulum to Golgi vesicle-mediated transport	32/6590	59/19652	0.000836501	0.0125042	0.0105815	AT5G17190/AT1G48440/AT1G56330/AT3G03160/AT3G59500/AT1G02130/AT2G36300/AT3G52760/AT5G42570/AT3G17780/AT3G11730/AT2G20930/AT1G30890/AT4G30260/AT4G14455/AT5G48660/AT1G80500/AT1G11905/AT5G02280/AT2G18840/AT5G58060/AT4G17170/AT3G24350/AT5G01430/AT3G52190/AT1G15880/AT3G07190/AT1G05785/AT1G11890/AT1G51160/AT5G43670/AT1G62020	32
GO:0006353	DNA-templated transcription termination	24/6590	41/19652	0.000879449	0.0129234	0.0109362	AT1G61960/AT4G38160/AT1G61980/AT5G64950/AT1G61990/AT4G02990/AT3G46950/AT2G44020/AT1G62010/AT2G03050/AT1G62150/AT1G62085/AT1G62110/AT5G07900/AT1G06190/AT2G34620/AT1G74120/AT2G22370/AT5G23930/AT3G18870/AT1G62120/AT2G36000/AT5G06810/AT1G21150	24
GO:0009767	photosynthetic electron transport chain	14/6590	20/19652	0.000935098	0.0135122	0.0114344	AT1G60950/AT4G03280/AT1G08380/ATCG00280/AT4G23890/AT5G66190/ATCG00680/AT3G21200/ATCG00540/ATCG00730/AT4G33520/AT1G14150/AT3G01440/ATCG00580	14
GO:0009737	response to abscisic acid	157/6590	382/19652	0.00108542	0.0154272	0.013055	AT5G59320/AT1G52400/AT4G34710/AT5G67300/AT1G09310/AT5G59310/AT3G03450/AT2G36530/AT4G24960/AT3G48680/AT1G69700/AT5G37770/AT4G38680/AT2G17840/AT3G05880/AT4G38970/AT1G35720/AT2G15970/AT1G80080/AT5G63510/AT3G15730/AT3G15210/AT1G63840/AT4G17260/AT5G51110/AT2G38750/AT5G54270/AT3G18490/AT1G71960/AT1G75750/AT5G45630/AT4G01370/AT5G59550/AT2G45640/AT1G75580/AT4G38860/AT2G16600/AT3G57870/AT3G46620/AT5G15970…	157
GO:0009653	anatomical structure morphogenesis	21/6590	35/19652	0.00117981	0.0164983	0.0139614	AT2G28950/AT4G28250/AT1G20190/AT2G40610/AT4G38400/AT3G60830/AT3G27010/AT3G03220/AT2G03090/AT5G02260/AT2G39700/AT3G29030/AT1G69530/AT2G37640/AT3G45970/AT1G26770/AT2G20750/AT4G17030/AT3G45960/AT3G55500/AT5G56320	21
GO:0008202	steroid metabolic process	20/6590	33/19652	0.00129259	0.0177885	0.0150532	AT1G11680/AT1G20050/AT4G24220/AT1G76090/AT2G34490/AT4G12110/AT1G20330/AT1G50430/AT3G02580/AT1G10030/AT5G13710/AT4G22755/AT2G38700/AT2G38050/AT5G47770/AT4G22756/AT3G52940/AT4G11820/AT1G07420/AT4G17190	20
GO:0015995	chlorophyll biosynthetic process	24/6590	42/19652	0.00140386	0.019018	0.0160936	AT5G18660/AT1G74470/AT1G69740/AT1G58290/AT3G02780/AT1G10670/AT5G58250/AT5G16440/AT3G48730/AT3G56940/AT2G40490/AT4G27440/AT5G45930/AT5G63570/AT4G25080/AT4G18480/AT1G63970/AT1G03475/AT3G14110/AT3G21200/AT5G08280/AT4G15560/AT1G03630/AT3G14930	24
GO:0046034	ATP metabolic process	9/6590	11/19652	0.00143615	0.0191561	0.0162105	AT5G08690/AT1G78900/AT5G08670/AT1G20260/AT1G76030/ATCG00480/AT4G38510/AT5G08680/AT2G07698	9
GO:0009739	response to gibberellin	36/6590	70/19652	0.00148377	0.0194913	0.0164942	AT2G01570/AT3G03450/AT1G66350/AT1G18080/AT1G14920/AT5G15230/AT4G32460/AT1G75750/AT2G34340/AT3G05120/AT2G38560/AT5G17490/AT5G53280/AT2G16070/AT4G25000/AT3G50500/AT1G69530/AT5G27320/AT5G47390/AT3G47620/AT1G67100/AT2G37640/AT4G19700/AT1G50420/AT2G16750/AT4G23060/AT3G58070/AT5G44610/AT4G24540/AT2G04240/AT5G67480/AT5G39760/AT1G26960/AT5G13910/AT2G45660/AT3G63010	36
GO:0009651	response to salt stress	140/6590	339/19652	0.0015639	0.0202374	0.0171255	AT1G05850/AT1G52400/AT4G34710/AT5G67300/AT2G28190/AT5G59310/AT2G45180/AT1G08830/AT4G39730/AT5G44440/AT5G14040/AT5G40770/AT3G48680/AT1G15690/AT1G74920/AT2G17840/AT2G45960/AT3G49580/AT5G65020/AT1G35720/AT3G44110/AT3G52150/AT5G63510/AT5G01410/AT1G72370/AT1G13930/AT5G24660/AT5G51110/AT2G38750/AT4G39090/AT1G10370/AT1G73500/AT5G56030/AT1G71730/AT2G03440/AT4G01370/AT2G39770/AT2G37760/AT2G45640/AT4G36020…	140
GO:0010411	xyloglucan metabolic process	22/6590	38/19652	0.00174627	0.022265	0.0188414	AT4G02500/AT3G62720/AT1G68560/AT5G57560/AT3G23730/AT4G03210/AT2G06850/AT1G74380/AT4G37800/AT5G65730/AT1G70230/AT3G48580/AT1G11545/AT4G14130/AT2G36870/AT2G01850/AT1G14720/AT4G30270/AT5G07720/AT2G14620/AT4G30280/AT3G25050	22
GO:0006098	pentose-phosphate shunt	15/6590	23/19652	0.00186138	0.0233887	0.0197923	AT1G64190/AT3G02360/AT1G71100/AT5G13420/AT2G01290/AT3G04790/AT5G24420/AT5G41670/AT3G49360/AT5G24400/AT3G27300/AT1G12230/AT5G13110/AT5G61410/AT1G63290	15
GO:0019684	photosynthesis, light reaction	14/6590	21/19652	0.00194036	0.0237586	0.0201053	AT5G66570/AT1G06680/AT3G50820/ATCG00220/ATCG00280/ATCG00020/ATCG00680/ATCG00420/ATCG00270/AT3G01440/ATCG01070/ATCG00440/ATCG00580/ATCG00430	14
GO:0009733	response to auxin	117/6590	279/19652	0.00194563	0.0237586	0.0201053	AT1G75950/AT5G09810/AT5G42190/AT5G13930/AT5G40770/AT4G38840/AT5G37770/AT5G57560/AT4G27280/AT3G01130/AT1G72430/AT2G22670/AT1G04250/AT1G10230/AT2G06850/AT5G18030/AT1G64520/AT5G54500/AT4G32460/AT5G20570/AT4G29080/AT4G34760/AT1G71090/AT2G26740/AT1G29510/AT1G75580/AT1G22920/AT4G38860/AT1G75590/AT1G19830/AT5G53590/AT1G29500/AT4G38630/AT4G13520/AT5G65670/AT1G54990/AT1G54060/AT4G36800/AT4G34800/AT5G47230…	117
GO:0006465	signal peptide processing	13/6590	19/19652	0.00198532	0.0239066	0.0202306	AT1G52600/AT2G22425/AT4G40042/AT2G39960/AT5G27430/AT1G53530/AT3G05230/AT3G15710/AT1G06200/AT1G34640/AT1G29960/AT3G24590/AT2G31140	13
GO:0007010	cytoskeleton organization	23/6590	41/19652	0.00244551	0.0290446	0.0245785	AT5G44340/AT5G09810/AT5G62700/AT5G62690/AT3G18780/AT5G12250/AT2G29550/AT4G14960/AT1G04820/AT4G20890/AT5G23860/AT5G19770/AT5G19780/AT3G53750/AT4G34490/AT2G37620/AT1G50010/AT3G60830/AT3G12110/AT1G20010/AT1G64740/AT5G59370/AT1G75780	23
GO:0006635	fatty acid beta-oxidation	18/6590	30/19652	0.00263173	0.0308339	0.0260927	AT2G33150/AT3G58750/AT4G14440/AT3G07560/AT5G43280/AT1G65520/AT4G14430/AT3G06860/AT5G42890/AT4G16760/AT5G27520/AT5G25760/AT4G16210/AT3G51840/AT2G42790/AT1G76150/AT1G06290/AT3G05290	18
GO:0098869	cellular oxidant detoxification	63/6590	140/19652	0.00305157	0.0351776	0.0297684	AT4G21960/AT3G49120/AT1G19570/AT3G52960/AT4G11600/AT2G28190/AT1G65980/AT1G08830/AT1G07890/AT5G34850/AT3G49580/AT1G44970/AT1G35720/AT3G17070/AT3G06050/AT1G78380/AT3G49570/AT2G30860/AT4G11290/AT5G24660/AT1G75270/AT1G60420/AT5G51890/AT2G47730/AT3G26060/AT1G71695/AT4G35000/AT3G49110/AT5G40150/AT3G11630/AT3G52880/AT3G03670/AT3G17790/AT2G31570/AT1G65970/AT3G28200/AT2G25080/AT1G05260/AT1G63460/AT3G21770…	63
GO:0009809	lignin biosynthetic process	21/6590	37/19652	0.00308362	0.0351776	0.0297684	AT5G48930/AT3G17390/AT1G07890/AT2G36880/AT4G39330/AT5G13420/AT5G54160/AT2G40890/AT4G01070/AT4G37980/AT1G52760/AT4G34050/AT4G34230/AT1G15950/AT3G19450/AT4G36220/AT1G72680/AT2G21730/AT5G66390/AT5G60020/AT2G21890	21
GO:0010207	photosystem II assembly	15/6590	24/19652	0.00343142	0.0386369	0.0326958	AT1G54500/AT5G66570/AT4G10340/AT1G03600/AT2G20890/AT3G50820/AT5G02120/AT1G71500/AT1G55480/AT1G34000/AT1G05385/ATCG00680/AT3G60370/AT4G19100/AT4G35760	15
GO:0008295	spermidine biosynthetic process	8/6590	10/19652	0.00354536	0.0389093	0.0329263	AT4G34710/AT3G02470/AT1G23820/AT2G16500/AT5G53120/AT1G70310/AT5G15950/AT5G18930	8
GO:0110102	ribulose bisphosphate carboxylase complex assembly	8/6590	10/19652	0.00354536	0.0389093	0.0329263	AT1G67090/AT5G38410/AT5G51110/AT3G47650/AT3G56910/AT5G28500/AT5G19855/AT3G04550	8
GO:0001732	formation of cytoplasmic translation initiation complex	14/6590	22/19652	0.00369522	0.0395525	0.0334706	AT5G44320/AT4G33250/AT3G11400/AT2G46280/AT2G39990/AT1G10840/AT3G57290/AT3G02200/AT5G37475/AT5G25757/AT2G46290/AT4G20980/AT5G01940/AT5G25754	14
GO:0002183	cytoplasmic translational initiation	14/6590	22/19652	0.00369522	0.0395525	0.0334706	AT3G13920/AT5G44320/AT4G33250/AT3G11400/AT2G46280/AT2G39990/AT1G10840/AT3G57290/AT3G02200/AT5G37475/AT5G25757/AT2G46290/AT4G20980/AT5G25754	14
GO:0000413	protein peptidyl-prolyl isomerization	19/6590	33/19652	0.00386942	0.0409121	0.0346211	AT4G38740/AT4G34870/AT3G25220/AT5G48580/AT2G21130/AT2G29960/AT2G16600/AT3G56070/AT4G34960/AT3G62030/AT5G58710/AT2G47320/AT1G74070/AT5G35100/AT2G36130/AT5G13120/AT2G38730/AT1G26940/AT4G17070	19
GO:0051716	cellular response to stimulus	9/6590	12/19652	0.00402786	0.0420742	0.0356045	AT1G21710/AT3G62980/AT3G26810/AT4G35090/AT4G08920/AT1G04400/AT4G03190/AT1G12820/AT1G20620	9
GO:0009970	cellular response to sulfate starvation	10/6590	14/19652	0.00423252	0.0427929	0.0362127	AT1G64660/AT4G35090/AT2G27050/ATCG00420/AT3G44320/AT1G55920/AT1G19920/AT1G78000/AT1G43700/AT1G20620	10
GO:0009646	response to absence of light	25/6590	47/19652	0.00423995	0.0427929	0.0362127	AT5G37770/AT5G20230/AT1G31812/AT5G45630/AT1G29640/AT1G62480/AT5G42890/AT4G02380/AT1G12080/AT2G37678/AT5G18170/AT5G63190/AT5G47390/AT2G28400/AT4G24800/AT4G18980/AT1G58340/AT4G08920/AT1G11700/AT1G04400/AT1G22730/AT5G42900/AT2G41100/AT1G67070/AT3G06850	25
GO:0006032	chitin catabolic process	11/6590	16/19652	0.00424474	0.0427929	0.0362127	AT1G05850/AT2G43610/AT3G16920/AT4G19810/AT3G47540/AT1G56680/AT2G43570/AT3G12500/AT4G19820/AT2G43620/AT2G43590	11
GO:0016226	iron-sulfur cluster assembly	18/6590	31/19652	0.00432357	0.0430867	0.0364614	AT5G18400/AT4G22220/AT5G61220/AT5G50960/AT4G04770/AT1G32500/AT4G01940/AT2G16710/AT4G28730/AT1G51390/AT1G10500/AT5G49940/AT4G03240/AT3G20970/AT1G68310/AT2G26060/AT3G01020/AT4G25910	18
GO:0009408	response to heat	77/6590	179/19652	0.00495301	0.0487984	0.0412949	AT5G42980/AT5G02500/AT1G05850/AT1G13440/AT3G04120/AT5G67300/AT4G26850/AT1G07890/AT4G04950/AT5G08000/AT5G37770/AT5G57560/AT5G58070/AT5G65020/AT1G35720/AT3G44110/AT1G79550/AT1G14980/AT5G56010/AT1G13930/AT2G27580/AT2G38750/AT1G64520/AT1G71960/AT2G03440/AT2G39770/AT4G29040/AT4G14540/AT4G38630/AT4G15802/AT5G55160/AT5G05630/AT3G09440/AT2G47180/AT5G02490/AT5G22060/AT3G53990/AT4G26840/AT1G71790/AT2G43130…	77

## Sheet: commun UP
ID	Description	GeneRatio	BgRatio	pvalue	p.adjust	qvalue	Count	Total_Count	gene_ratio_value
GO:0000045	autophagosome assembly	8/5086	10/19652	0.000535678	0.00522286	0.00404963	8	5086	1.57295
GO:0000165	MAPK cascade	21/5086	44/19652	0.00146683	0.0117621	0.00911988	21	5086	4.12898
GO:0000184	nuclear-transcribed mRNA catabolic process, nonsense-mediated decay	11/5086	19/19652	0.00306999	0.0219504	0.0170196	11	5086	2.1628
GO:0000226	microtubule cytoskeleton organization	20/5086	44/19652	0.00386571	0.0258668	0.0200562	20	5086	3.93236
GO:0000278	mitotic cell cycle	16/5086	30/19652	0.001217	0.0102371	0.00793748	16	5086	3.14589
GO:0000373	Group II intron splicing	14/5086	28/19652	0.00527187	0.0327773	0.0254144	14	5086	2.75265
GO:0000398	mRNA splicing, via spliceosome	49/5086	120/19652	0.000239324	0.00279437	0.00216666	49	5086	9.63429
GO:0000723	telomere maintenance	12/5086	17/19652	0.000142556	0.00185323	0.00143693	12	5086	2.35942
GO:0000724	double-strand break repair via homologous recombination	25/5086	44/19652	1.30424e-05	0.000228374	0.000177073	25	5086	4.91545
GO:0000911	cytokinesis by cell plate formation	24/5086	41/19652	9.65779e-06	0.000178304	0.000138251	24	5086	4.71884
GO:0001510	RNA methylation	19/5086	27/19652	1.614e-06	3.64423e-05	2.82561e-05	19	5086	3.73575
GO:0005982	starch metabolic process	9/5086	14/19652	0.00278686	0.0200935	0.0155798	9	5086	1.76956
GO:0006075	(1->3)-beta-D-glucan biosynthetic process	12/5086	12/19652	8.9424e-08	3.48754e-06	2.70411e-06	12	5086	2.35942
GO:0006139	nucleobase-containing compound metabolic process	23/5086	47/19652	0.000569514	0.00549037	0.00425704	23	5086	4.52222
GO:0006259	DNA metabolic process	14/5086	26/19652	0.00217405	0.0166782	0.0129317	14	5086	2.75265
GO:0006260	DNA replication	48/5086	98/19652	7.4765e-07	1.83281e-05	1.4211e-05	48	5086	9.43767
GO:0006265	DNA topological change	11/5086	13/19652	1.57317e-05	0.000269956	0.000209314	11	5086	2.1628
GO:0006270	DNA replication initiation	10/5086	15/19652	0.00106265	0.00902729	0.00699945	10	5086	1.96618
GO:0006281	DNA repair	146/5086	257/19652	4.43718e-26	6.34517e-24	4.91982e-24	146	5086	28.7063
GO:0006282	regulation of DNA repair	12/5086	12/19652	8.9424e-08	3.48754e-06	2.70411e-06	12	5086	2.35942
GO:0006289	nucleotide-excision repair	18/5086	26/19652	4.4338e-06	8.84698e-05	6.85964e-05	18	5086	3.53913
GO:0006298	mismatch repair	12/5086	13/19652	8.85279e-07	2.05289e-05	1.59174e-05	12	5086	2.35942
GO:0006302	double-strand break repair	13/5086	22/19652	0.000992821	0.00878186	0.00680915	13	5086	2.55604
GO:0006306	DNA methylation	12/5086	19/19652	0.000677787	0.00618661	0.00479688	12	5086	2.35942
GO:0006310	DNA recombination	51/5086	85/19652	3.09788e-11	1.66124e-09	1.28807e-09	51	5086	10.0275
GO:0006325	chromatin organization	113/5086	194/19652	1.08753e-21	1.333e-19	1.03356e-19	113	5086	22.2179
GO:0006338	chromatin remodeling	101/5086	141/19652	5.28828e-30	1.13434e-27	8.79525e-28	101	5086	19.8584
GO:0006352	DNA-templated transcription initiation	17/5086	35/19652	0.00322291	0.0228533	0.0177197	17	5086	3.34251
GO:0006357	regulation of transcription by RNA polymerase II	68/5086	154/19652	6.35968e-07	1.60488e-05	1.24437e-05	68	5086	13.37
GO:0006364	rRNA processing	73/5086	149/19652	1.09094e-09	5.20014e-08	4.03201e-08	73	5086	14.3531
GO:0006366	transcription by RNA polymerase II	7/5086	10/19652	0.00432778	0.0275055	0.0213268	7	5086	1.37633
GO:0006397	mRNA processing	162/5086	333/19652	2.23753e-19	2.39975e-17	1.86068e-17	162	5086	31.8521
GO:0006400	tRNA modification	14/5086	25/19652	0.00131455	0.0107417	0.00832877	14	5086	2.75265
GO:0006402	mRNA catabolic process	15/5086	31/19652	0.00579784	0.0352805	0.0273552	15	5086	2.94927
GO:0006415	translational termination	8/5086	12/19652	0.0035156	0.0239396	0.0185619	8	5086	1.57295
GO:0006418	tRNA aminoacylation for protein translation	21/5086	43/19652	0.00101102	0.00885162	0.00686324	21	5086	4.12898
GO:0006468	protein phosphorylation	427/5086	998/19652	8.06778e-33	3.46108e-30	2.6836e-30	427	5086	83.956
GO:0006508	proteolysis	163/5086	501/19652	0.000448729	0.0047532	0.00368546	163	5086	32.0488
GO:0006623	protein targeting to vacuole	16/5086	29/19652	0.00074617	0.00673909	0.00522526	16	5086	3.14589
GO:0006816	calcium ion transport	28/5086	49/19652	3.4133e-06	7.14295e-05	5.5384e-05	28	5086	5.50531
GO:0006886	intracellular protein transport	69/5086	158/19652	8.68037e-07	2.05289e-05	1.59174e-05	69	5086	13.5667
GO:0006896	Golgi to vacuole transport	9/5086	11/19652	0.000167969	0.00203988	0.00158165	9	5086	1.76956
GO:0006897	endocytosis	20/5086	43/19652	0.00277531	0.0200935	0.0155798	20	5086	3.93236
GO:0006914	autophagy	28/5086	51/19652	9.76725e-06	0.000178304	0.000138251	28	5086	5.50531
GO:0006974	cellular response to DNA damage stimulus	132/5086	218/19652	2.22785e-27	3.82298e-25	2.96421e-25	132	5086	25.9536
GO:0006996	organelle organization	10/5086	14/19652	0.000461472	0.00477039	0.0036988	10	5086	1.96618
GO:0007015	actin filament organization	26/5086	47/19652	1.68634e-05	0.000283702	0.000219973	26	5086	5.11207
GO:0007018	microtubule-based movement	59/5086	63/19652	3.3601e-30	9.60988e-28	7.45117e-28	59	5086	11.6005
GO:0007030	Golgi organization	13/5086	20/19652	0.000265542	0.00299782	0.00232441	13	5086	2.55604
GO:0007033	vacuole organization	13/5086	21/19652	0.000531909	0.00522286	0.00404963	13	5086	2.55604
GO:0007049	cell cycle	140/5086	282/19652	6.82681e-18	6.50823e-16	5.04625e-16	140	5086	27.5265
GO:0007059	chromosome segregation	22/5086	41/19652	0.000137208	0.00183945	0.00142624	22	5086	4.3256
GO:0007062	sister chromatid cohesion	12/5086	15/19652	1.79997e-05	0.000285995	0.000221751	12	5086	2.35942
GO:0007064	mitotic sister chromatid cohesion	9/5086	12/19652	0.000516551	0.00522286	0.00404963	9	5086	1.76956
GO:0007131	reciprocal meiotic recombination	14/5086	27/19652	0.0034488	0.0239396	0.0185619	14	5086	2.75265
GO:0007165	signal transduction	104/5086	313/19652	0.00211609	0.0165055	0.0127978	104	5086	20.4483
GO:0008033	tRNA processing	46/5086	89/19652	1.70946e-07	5.4323e-06	4.21201e-06	46	5086	9.04444
GO:0008360	regulation of cell shape	19/5086	24/19652	7.15054e-08	3.06758e-06	2.37849e-06	19	5086	3.73575
GO:0008380	RNA splicing	100/5086	206/19652	1.98504e-12	1.31012e-10	1.01582e-10	100	5086	19.6618
GO:0009294	DNA-mediated transformation	13/5086	25/19652	0.00463987	0.0292721	0.0226966	13	5086	2.55604
GO:0009553	embryo sac development	35/5086	73/19652	4.04507e-05	0.000608889	0.000472111	35	5086	6.88164
GO:0009555	pollen development	82/5086	235/19652	0.00128865	0.0107346	0.0083232	82	5086	16.1227
GO:0009556	microsporogenesis	15/5086	26/19652	0.000577835	0.00550869	0.00427125	15	5086	2.94927
GO:0009561	megagametogenesis	16/5086	31/19652	0.00191534	0.0150767	0.01169	16	5086	3.14589
GO:0009637	response to blue light	21/5086	48/19652	0.00540143	0.0333412	0.0258516	21	5086	4.12898
GO:0009658	chloroplast organization	59/5086	149/19652	0.00016268	0.00203988	0.00158165	59	5086	11.6005
GO:0009791	post-embryonic development	31/5086	65/19652	0.000123895	0.00168733	0.00130829	31	5086	6.09516
GO:0009793	embryo development ending in seed dormancy	123/5086	318/19652	3.09741e-07	8.8586e-06	6.86864e-06	123	5086	24.184
GO:0009845	seed germination	31/5086	79/19652	0.00625733	0.0378084	0.0293153	31	5086	6.09516
GO:0009903	chloroplast avoidance movement	9/5086	11/19652	0.000167969	0.00203988	0.00158165	9	5086	1.76956
GO:0009908	flower development	92/5086	220/19652	1.69314e-07	5.4323e-06	4.21201e-06	92	5086	18.0889
GO:0009910	negative regulation of flower development	22/5086	40/19652	8.40517e-05	0.00116317	0.000901879	22	5086	4.3256
GO:0009933	meristem structural organization	12/5086	21/19652	0.00231515	0.0175788	0.0136299	12	5086	2.35942
GO:0009965	leaf morphogenesis	25/5086	53/19652	0.000670694	0.00618661	0.00479688	25	5086	4.91545
GO:0010072	primary shoot apical meristem specification	12/5086	15/19652	1.79997e-05	0.000285995	0.000221751	12	5086	2.35942
GO:0010073	meristem maintenance	20/5086	38/19652	0.000385628	0.00418822	0.0032474	20	5086	3.93236
GO:0010090	trichome morphogenesis	20/5086	37/19652	0.000241006	0.00279437	0.00216666	20	5086	3.93236
GO:0010182	sugar mediated signaling pathway	15/5086	31/19652	0.00579784	0.0352805	0.0273552	15	5086	2.94927
GO:0010228	vegetative to reproductive phase transition of meristem	42/5086	104/19652	0.000839815	0.00750585	0.00581977	42	5086	8.25796
GO:0010239	chloroplast mRNA processing	8/5086	10/19652	0.000535678	0.00522286	0.00404963	8	5086	1.57295
GO:0010267	ta-siRNA processing	10/5086	15/19652	0.00106265	0.00902729	0.00699945	10	5086	1.96618
GO:0010305	leaf vascular tissue pattern formation	14/5086	27/19652	0.0034488	0.0239396	0.0185619	14	5086	2.75265
GO:0010492	maintenance of shoot apical meristem identity	12/5086	19/19652	0.000677787	0.00618661	0.00479688	12	5086	2.35942
GO:0015031	protein transport	205/5086	620/19652	3.0701e-05	0.000470383	0.000364719	205	5086	40.3067
GO:0015914	phospholipid transport	12/5086	15/19652	1.79997e-05	0.000285995	0.000221751	12	5086	2.35942
GO:0016310	phosphorylation	541/5086	1279/19652	5.21714e-40	4.4763e-37	3.47077e-37	541	5086	106.37
GO:0016311	dephosphorylation	15/5086	29/19652	0.0025681	0.0191603	0.0148562	15	5086	2.94927
GO:0016441	post-transcriptional gene silencing	8/5086	11/19652	0.00151624	0.0120456	0.00933977	8	5086	1.57295
GO:0016571	histone methylation	12/5086	22/19652	0.00390194	0.0258668	0.0200562	12	5086	2.35942
GO:0016573	histone acetylation	10/5086	14/19652	0.000461472	0.00477039	0.0036988	10	5086	1.96618
GO:0016579	protein deubiquitination	36/5086	50/19652	1.11887e-11	6.85707e-10	5.31673e-10	36	5086	7.07825
GO:0019252	starch biosynthetic process	17/5086	33/19652	0.00143051	0.011579	0.00897796	17	5086	3.34251
GO:0030036	actin cytoskeleton organization	16/5086	27/19652	0.000247825	0.00283511	0.00219825	16	5086	3.14589
GO:0030048	actin filament-based movement	18/5086	19/19652	3.80821e-10	1.92203e-08	1.49027e-08	18	5086	3.53913
GO:0030422	siRNA processing	12/5086	17/19652	0.000142556	0.00185323	0.00143693	12	5086	2.35942
GO:0030433	ubiquitin-dependent ERAD pathway	9/5086	14/19652	0.00278686	0.0200935	0.0155798	9	5086	1.76956
GO:0031047	RNA-mediated gene silencing	58/5086	84/19652	1.29098e-16	1.10766e-14	8.58843e-15	58	5086	11.4039
GO:0031349	positive regulation of defense response	9/5086	14/19652	0.00278686	0.0200935	0.0155798	9	5086	1.76956
GO:0031507	heterochromatin formation	10/5086	11/19652	1.12704e-05	0.000201458	0.000156203	10	5086	1.96618
GO:0032259	methylation	127/5086	329/19652	2.28111e-07	6.98996e-06	5.41977e-06	127	5086	24.9705
GO:0032508	DNA duplex unwinding	31/5086	40/19652	1.22648e-11	7.01548e-10	5.43955e-10	31	5086	6.09516
GO:0034204	lipid translocation	11/5086	12/19652	3.16934e-06	6.79824e-05	5.27112e-05	11	5086	2.1628
GO:0034220	monoatomic ion transmembrane transport	49/5086	115/19652	6.83202e-05	0.000960963	0.000745097	49	5086	9.63429
GO:0035194	RNA-mediated post-transcriptional gene silencing	8/5086	13/19652	0.00707342	0.0415685	0.0322307	8	5086	1.57295
GO:0035556	intracellular signal transduction	17/5086	30/19652	0.000334197	0.00367617	0.00285037	17	5086	3.34251
GO:0036297	interstrand cross-link repair	7/5086	10/19652	0.00432778	0.0275055	0.0213268	7	5086	1.37633
GO:0040029	epigenetic regulation of gene expression	29/5086	51/19652	2.62315e-06	5.77093e-05	4.47457e-05	29	5086	5.70193
GO:0042127	regulation of cell population proliferation	14/5086	22/19652	0.000212817	0.00253606	0.00196638	14	5086	2.75265
GO:0042147	retrograde transport, endosome to Golgi	12/5086	18/19652	0.000326681	0.00364016	0.00282245	12	5086	2.35942
GO:0042254	ribosome biogenesis	46/5086	97/19652	3.89974e-06	7.96661e-05	6.17703e-05	46	5086	9.04444
GO:0042908	xenobiotic transport	15/5086	24/19652	0.000168801	0.00203988	0.00158165	15	5086	2.94927
GO:0043170	macromolecule metabolic process	18/5086	37/19652	0.00240794	0.0181229	0.0140519	18	5086	3.53913
GO:0044030	regulation of DNA methylation	10/5086	16/19652	0.00217711	0.0166782	0.0129317	10	5086	1.96618
GO:0044237	cellular metabolic process	11/5086	20/19652	0.00523801	0.0327773	0.0254144	11	5086	2.1628
GO:0044238	primary metabolic process	29/5086	63/19652	0.000430785	0.00462017	0.00358231	29	5086	5.70193
GO:0045010	actin nucleation	13/5086	18/19652	5.04939e-05	0.000746961	0.000579168	13	5086	2.55604
GO:0045037	protein import into chloroplast stroma	14/5086	25/19652	0.00131455	0.0107417	0.00832877	14	5086	2.75265
GO:0045324	late endosome to vacuole transport	8/5086	12/19652	0.0035156	0.0239396	0.0185619	8	5086	1.57295
GO:0045814	negative regulation of gene expression, epigenetic	24/5086	35/19652	1.44301e-07	5.15875e-06	3.99991e-06	24	5086	4.71884
GO:0045892	negative regulation of DNA-templated transcription	63/5086	184/19652	0.00701974	0.0415685	0.0322307	63	5086	12.3869
GO:0046488	phosphatidylinositol metabolic process	14/5086	16/19652	4.12665e-07	1.10646e-05	8.57909e-06	14	5086	2.75265
GO:0046777	protein autophosphorylation	53/5086	111/19652	5.66095e-07	1.47185e-05	1.14122e-05	53	5086	10.4208
GO:0046856	phosphatidylinositol dephosphorylation	16/5086	22/19652	5.61813e-06	0.000109554	8.4944e-05	16	5086	3.14589
GO:0048364	root development	64/5086	183/19652	0.00385921	0.0258668	0.0200562	64	5086	12.5836
GO:0048481	plant ovule development	25/5086	45/19652	2.21467e-05	0.000345489	0.00026788	25	5086	4.91545
GO:0048544	recognition of pollen	20/5086	39/19652	0.000600165	0.0056587	0.00438756	20	5086	3.93236
GO:0048589	developmental growth	11/5086	14/19652	5.61013e-05	0.000802249	0.000622036	11	5086	2.1628
GO:0048731	system development	10/5086	15/19652	0.00106265	0.00902729	0.00699945	10	5086	1.96618
GO:0051026	chiasma assembly	8/5086	13/19652	0.00707342	0.0415685	0.0322307	8	5086	1.57295
GO:0051028	mRNA transport	27/5086	65/19652	0.0042117	0.027376	0.0212264	27	5086	5.30869
GO:0051171	regulation of nitrogen compound metabolic process	9/5086	11/19652	0.000167969	0.00203988	0.00158165	9	5086	1.76956
GO:0051225	spindle assembly	8/5086	12/19652	0.0035156	0.0239396	0.0185619	8	5086	1.57295
GO:0051276	chromosome organization	14/5086	16/19652	4.12665e-07	1.10646e-05	8.57909e-06	14	5086	2.75265
GO:0051301	cell division	138/5086	287/19652	3.55675e-16	2.77426e-14	2.15107e-14	138	5086	27.1333
GO:0051321	meiotic cell cycle	53/5086	82/19652	1.7641e-13	1.26133e-11	9.7799e-12	53	5086	10.4208
GO:0060236	regulation of mitotic spindle organization	7/5086	10/19652	0.00432778	0.0275055	0.0213268	7	5086	1.37633
GO:0060255	regulation of macromolecule metabolic process	16/5086	19/19652	1.67476e-07	5.4323e-06	4.21201e-06	16	5086	3.14589
GO:0070588	calcium ion transmembrane transport	32/5086	61/19652	8.34331e-06	0.000159079	0.000123344	32	5086	6.29178
GO:0071230	cellular response to amino acid stimulus	10/5086	17/19652	0.00406593	0.0266303	0.0206482	10	5086	1.96618
GO:0071482	cellular response to light stimulus	11/5086	14/19652	5.61013e-05	0.000802249	0.000622036	11	5086	2.1628
GO:0071897	DNA biosynthetic process	22/5086	27/19652	2.30799e-09	1.04224e-07	8.08116e-08	22	5086	4.3256
GO:0072583	clathrin-dependent endocytosis	15/5086	30/19652	0.00391921	0.0258668	0.0200562	15	5086	2.94927
GO:0080090	regulation of primary metabolic process	8/5086	10/19652	0.000535678	0.00522286	0.00404963	8	5086	1.57295
GO:0080111	DNA demethylation	13/5086	14/19652	2.45858e-07	7.27399e-06	5.64e-06	13	5086	2.55604
GO:0080188	gene silencing by RNA-directed DNA methylation	24/5086	35/19652	1.44301e-07	5.15875e-06	3.99991e-06	24	5086	4.71884
GO:1902476	chloride transmembrane transport	8/5086	13/19652	0.00707342	0.0415685	0.0322307	8	5086	1.57295

## Sheet: commun DOWN
ID	Description	GeneRatio	BgRatio	pvalue	p.adjust	qvalue	Count	Total_Count	gene_ratio_value
GO:0000290	deadenylation-dependent decapping of nuclear-transcribed mRNA	10/4928	15/19652	0.000812055	0.0118868	0.0105523	10	4928	2.02922
GO:0000387	spliceosomal snRNP assembly	11/4928	14/19652	4.07867e-05	0.00098937	0.000878295	11	4928	2.23214
GO:0000413	protein peptidyl-prolyl isomerization	19/4928	33/19652	7.06485e-05	0.00153796	0.0013653	19	4928	3.85552
GO:0001732	formation of cytoplasmic translation initiation complex	13/4928	22/19652	0.000717799	0.0106914	0.00949112	13	4928	2.63799
GO:0002183	cytoplasmic translational initiation	14/4928	22/19652	0.000147778	0.00285145	0.00253132	14	4928	2.84091
GO:0006086	acetyl-CoA biosynthetic process from pyruvate	8/4928	12/19652	0.002832	0.0312255	0.0277199	8	4928	1.62338
GO:0006094	gluconeogenesis	10/4928	17/19652	0.00316433	0.0344425	0.0305757	10	4928	2.02922
GO:0006096	glycolytic process	39/4928	71/19652	7.33424e-08	4.15118e-06	3.68513e-06	39	4928	7.91396
GO:0006098	pentose-phosphate shunt	14/4928	23/19652	0.000290501	0.00505724	0.00448947	14	4928	2.84091
GO:0006099	tricarboxylic acid cycle	38/4928	60/19652	4.20209e-10	4.20715e-08	3.73482e-08	38	4928	7.71104
GO:0006353	DNA-templated transcription termination	22/4928	41/19652	8.27318e-05	0.00171315	0.00152082	22	4928	4.46429
GO:0006412	translation	333/4928	681/19652	2.03929e-42	1.73136e-39	1.53698e-39	333	4928	67.5731
GO:0006413	translational initiation	43/4928	105/19652	0.00025058	0.00462483	0.0041056	43	4928	8.72565
GO:0006414	translational elongation	31/4928	79/19652	0.00379365	0.038805	0.0344484	31	4928	6.29058
GO:0006457	protein folding	56/4928	130/19652	5.34578e-06	0.000189107	0.000167876	56	4928	11.3636
GO:0006465	signal peptide processing	13/4928	19/19652	8.56465e-05	0.00173128	0.00153691	13	4928	2.63799
GO:0006511	ubiquitin-dependent protein catabolic process	67/4928	150/19652	1.3028e-07	6.91299e-06	6.13688e-06	67	4928	13.5958
GO:0006526	arginine biosynthetic process	8/4928	12/19652	0.002832	0.0312255	0.0277199	8	4928	1.62338
GO:0006596	polyamine biosynthetic process	10/4928	14/19652	0.000349401	0.00593283	0.00526676	10	4928	2.02922
GO:0006605	protein targeting	7/4928	10/19652	0.00356389	0.0368993	0.0327567	7	4928	1.42045
GO:0006626	protein targeting to mitochondrion	9/4928	14/19652	0.00219644	0.0258997	0.022992	9	4928	1.8263
GO:0006629	lipid metabolic process	177/4928	541/19652	3.16902e-05	0.000791322	0.000702481	177	4928	35.9172
GO:0006631	fatty acid metabolic process	70/4928	152/19652	1.50503e-08	9.12691e-07	8.10225e-07	70	4928	14.2045
GO:0006633	fatty acid biosynthetic process	65/4928	121/19652	1.39105e-11	2.36201e-09	2.09683e-09	65	4928	13.1899
GO:0006694	steroid biosynthetic process	20/4928	43/19652	0.0018488	0.0230828	0.0204913	20	4928	4.05844
GO:0006730	one-carbon metabolic process	14/4928	27/19652	0.00251006	0.0287978	0.0255647	14	4928	2.84091
GO:0006754	ATP biosynthetic process	15/4928	22/19652	2.539e-05	0.000743314	0.000659863	15	4928	3.04383
GO:0006833	water transport	17/4928	23/19652	1.20867e-06	4.88649e-05	4.33789e-05	17	4928	3.44968
GO:0006865	amino acid transport	26/4928	63/19652	0.00346295	0.0362969	0.0322219	26	4928	5.27597
GO:0006888	endoplasmic reticulum to Golgi vesicle-mediated transport	28/4928	59/19652	0.000162201	0.0030602	0.00271664	28	4928	5.68182
GO:0006949	syncytium formation	8/4928	10/19652	0.000423809	0.00678893	0.00602675	8	4928	1.62338
GO:0006979	response to oxidative stress	97/4928	268/19652	3.0839e-05	0.000791322	0.000702481	97	4928	19.6834
GO:0007010	cytoskeleton organization	22/4928	41/19652	8.27318e-05	0.00171315	0.00152082	22	4928	4.46429
GO:0007017	microtubule-based process	20/4928	28/19652	3.33483e-07	1.57062e-05	1.39429e-05	20	4928	4.05844
GO:0008202	steroid metabolic process	19/4928	33/19652	7.06485e-05	0.00153796	0.0013653	19	4928	3.85552
GO:0008295	spermidine biosynthetic process	8/4928	10/19652	0.000423809	0.00678893	0.00602675	8	4928	1.62338
GO:0008652	amino acid biosynthetic process	76/4928	159/19652	4.45987e-10	4.20715e-08	3.73482e-08	76	4928	15.4221
GO:0009073	aromatic amino acid family biosynthetic process	19/4928	40/19652	0.00175676	0.0222611	0.0197618	19	4928	3.85552
GO:0009086	methionine biosynthetic process	13/4928	24/19652	0.00214393	0.0256366	0.0227584	13	4928	2.63799
GO:0009269	response to desiccation	11/4928	16/19652	0.000291878	0.00505724	0.00448947	11	4928	2.23214
GO:0009409	response to cold	144/4928	332/19652	1.82873e-13	5.1753e-11	4.59428e-11	144	4928	29.2208
GO:0009414	response to water deprivation	105/4928	330/19652	0.00321615	0.0345634	0.0306831	105	4928	21.3068
GO:0009416	response to light stimulus	57/4928	136/19652	1.20822e-05	0.00039453	0.000350237	57	4928	11.5666
GO:0009631	cold acclimation	28/4928	53/19652	1.35445e-05	0.000410688	0.000364581	28	4928	5.68182
GO:0009644	response to high light intensity	30/4928	45/19652	4.89867e-09	3.46581e-07	3.07671e-07	30	4928	6.08766
GO:0009645	response to low light intensity stimulus	9/4928	10/19652	3.02055e-05	0.000791322	0.000702481	9	4928	1.8263
GO:0009733	response to auxin	93/4928	279/19652	0.00114025	0.0156141	0.0138612	93	4928	18.8718
GO:0009744	response to sucrose	32/4928	72/19652	0.000264011	0.00476904	0.00423363	32	4928	6.49351
GO:0009765	photosynthesis, light harvesting	20/4928	22/19652	1.25955e-10	1.52766e-08	1.35615e-08	20	4928	4.05844
GO:0009767	photosynthetic electron transport chain	14/4928	20/19652	3.03182e-05	0.000791322	0.000702481	14	4928	2.84091
GO:0009768	photosynthesis, light harvesting in photosystem I	10/4928	10/19652	9.76485e-07	4.14518e-05	3.67981e-05	10	4928	2.02922
GO:0009853	photorespiration	37/4928	53/19652	9.35156e-12	1.98487e-09	1.76203e-09	37	4928	7.50812
GO:0010043	response to zinc ion	28/4928	45/19652	1.46968e-07	7.33974e-06	6.51572e-06	28	4928	5.68182
GO:0010143	cutin biosynthetic process	9/4928	13/19652	0.00100906	0.0142782	0.0126752	9	4928	1.8263
GO:0010196	nonphotochemical quenching	9/4928	15/19652	0.00427303	0.04268	0.0378884	9	4928	1.8263
GO:0010207	photosystem II assembly	13/4928	24/19652	0.00214393	0.0256366	0.0227584	13	4928	2.63799
GO:0015031	protein transport	228/4928	620/19652	3.55963e-11	5.03688e-09	4.4714e-09	228	4928	46.2662
GO:0015977	carbon fixation	8/4928	11/19652	0.00121051	0.016313	0.0144816	8	4928	1.62338
GO:0015979	photosynthesis	107/4928	167/19652	1.60398e-26	6.8089e-24	6.04448e-24	107	4928	21.7127
GO:0015986	proton motive force-driven ATP synthesis	22/4928	35/19652	2.52177e-06	9.72636e-05	8.6344e-05	22	4928	4.46429
GO:0015995	chlorophyll biosynthetic process	21/4928	42/19652	0.000432567	0.00680091	0.00603738	21	4928	4.26136
GO:0016126	sterol biosynthetic process	22/4928	40/19652	5.01874e-05	0.00118359	0.00105071	22	4928	4.46429
GO:0016192	vesicle-mediated transport	94/4928	245/19652	2.63494e-06	9.72636e-05	8.6344e-05	94	4928	19.0747
GO:0016226	iron-sulfur cluster assembly	16/4928	31/19652	0.0013363	0.0177269	0.0157367	16	4928	3.24675
GO:0019253	reductive pentose-phosphate cycle	18/4928	21/19652	8.88255e-09	5.80099e-07	5.14972e-07	18	4928	3.6526
GO:0019684	photosynthesis, light reaction	12/4928	21/19652	0.00172603	0.0222611	0.0197618	12	4928	2.43506
GO:0019752	carboxylic acid metabolic process	18/4928	34/19652	0.000453112	0.0069944	0.00620915	18	4928	3.6526
GO:0022900	electron transport chain	50/4928	93/19652	2.95578e-09	2.28133e-07	2.02521e-07	50	4928	10.1461
GO:0033014	tetrapyrrole biosynthetic process	8/4928	12/19652	0.002832	0.0312255	0.0277199	8	4928	1.62338
GO:0034599	cellular response to oxidative stress	17/4928	36/19652	0.00326824	0.0346842	0.0307903	17	4928	3.44968
GO:0035999	tetrahydrofolate interconversion	9/4928	15/19652	0.00427303	0.04268	0.0378884	9	4928	1.8263
GO:0042538	hyperosmotic salinity response	22/4928	49/19652	0.0019701	0.0242408	0.0215193	22	4928	4.46429
GO:0042631	cellular response to water deprivation	18/4928	38/19652	0.00239489	0.0278529	0.0247259	18	4928	3.6526
GO:0042761	very long-chain fatty acid biosynthetic process	15/4928	18/19652	3.51493e-07	1.57062e-05	1.39429e-05	15	4928	3.04383
GO:0043085	positive regulation of catalytic activity	12/4928	15/19652	1.26823e-05	0.000398789	0.000354017	12	4928	2.43506
GO:0043161	proteasome-mediated ubiquitin-dependent protein catabolic process	19/4928	40/19652	0.00175676	0.0222611	0.0197618	19	4928	3.85552
GO:0045039	protein insertion into mitochondrial inner membrane	9/4928	10/19652	3.02055e-05	0.000791322	0.000702481	9	4928	1.8263
GO:0045454	cell redox homeostasis	14/4928	24/19652	0.000536586	0.00813502	0.00722172	14	4928	2.84091
GO:0046686	response to cadmium ion	30/4928	62/19652	6.09792e-05	0.00139922	0.00124214	30	4928	6.08766
GO:0051603	proteolysis involved in protein catabolic process	25/4928	33/19652	1.4176e-09	1.20354e-07	1.06842e-07	25	4928	5.07305
GO:0071456	cellular response to hypoxia	83/4928	231/19652	0.000146775	0.00285145	0.00253132	83	4928	16.8425
GO:0071472	cellular response to salt stress	18/4928	36/19652	0.001098	0.0152821	0.0135664	18	4928	3.6526
GO:0071806	protein transmembrane transport	14/4928	19/19652	1.18416e-05	0.00039453	0.000350237	14	4928	2.84091
GO:0110102	ribulose bisphosphate carboxylase complex assembly	8/4928	10/19652	0.000423809	0.00678893	0.00602675	8	4928	1.62338
GO:1902600	proton transmembrane transport	52/4928	140/19652	0.00100171	0.0142782	0.0126752	52	4928	10.5519
