# Supplementary material for: Integrative phenotyping analyses reveal the relevance of the phyB-PIF4 pathway in Arabidopsis thaliana reproductive organs at high ambient temperature
Source: BMC Plant Biol. 2024 Jul 29;24:721. doi: 10.1186/s12870-024-05394-w (PMC11285529; doi:10.1186/s12870-024-05394-w)
Supplement: Supplementary file 14 — Additional File 4: Table S3 [file 12870_2024_5394_MOESM14_ESM.xlsx]

## Sheet: Top 100 DEG
gene_id	gene_description
AT5G60390	Elongation factor 1-alpha 4 [Source:UniProtKB/Swiss-Prot;Acc:Q8GTY0]
AT5G13930	Chalcone synthase family protein [Source:UniProtKB/TrEMBL;Acc:Q460R0]
AT5G44340	Tubulin beta-4 chain [Source:UniProtKB/Swiss-Prot;Acc:P24636]
AT2G18440	GUT15 (GENE WITH UNSTABLE TRANSCRIPT 15); other RNA [Source:TAIR;Acc:AT2G18440]
AT2G20870	At2g20870 [Source:UniProtKB/TrEMBL;Acc:A6QRC7]
AT2G43610	Endochitinase At2g43610 [Source:UniProtKB/Swiss-Prot;Acc:O22842]
AT4G11830	Phospholipase D gamma 2 [Source:UniProtKB/Swiss-Prot;Acc:Q9T051]
AT4G30440	GAE1 [Source:UniProtKB/TrEMBL;Acc:A0A384LBP5]
AT1G53780	26S proteasome regulatory complex ATPase [Source:UniProtKB/TrEMBL;Acc:F4HTC3]
AT3G02230	RGP1 [Source:UniProtKB/TrEMBL;Acc:A0A178VK37]
AT2G38530	Non-specific lipid-transfer protein [Source:UniProtKB/TrEMBL;Acc:A0A178W063]
AT2G36830	Aquaporin TIP1-1 [Source:UniProtKB/Swiss-Prot;Acc:P25818]
AT5G62210	Embryo-specific protein 3, (ATS3) [Source:UniProtKB/TrEMBL;Acc:Q9LVB5]
AT3G08030	F17A17.37 protein [Source:UniProtKB/TrEMBL;Acc:Q9SFB1]
AT5G02500	Probable mediator of RNA polymerase II transcription subunit 37e [Source:UniProtKB/Swiss-Prot;Acc:P22953]
AT3G13920	Eukaryotic translation initiation factor 4A1 [Source:UniProtKB/TrEMBL;Acc:A0A1I9LSZ7]
AT1G07930	Elongation factor 1-alpha 4 [Source:UniProtKB/Swiss-Prot;Acc:Q8GTY0]
AT3G47520	Malate dehydrogenase, chloroplastic [Source:UniProtKB/Swiss-Prot;Acc:Q9SN86]
AT1G13280	Allene oxide cyclase 4, chloroplastic [Source:UniProtKB/Swiss-Prot;Acc:Q93ZC5]
AT5G42980	Thioredoxin H3 [Source:UniProtKB/Swiss-Prot;Acc:Q42403]
AT3G08580	AAC1 [Source:UniProtKB/TrEMBL;Acc:A0A384KYV2]
AT1G67750	Probable pectate lyase 5 [Source:UniProtKB/Swiss-Prot;Acc:Q9FXD8]
AT2G25520	Probable sugar phosphate/phosphate translocator At2g25520 [Source:UniProtKB/Swiss-Prot;Acc:Q9SKJ7]
AT2G23790	Calcium uniporter protein 2, mitochondrial [Source:UniProtKB/Swiss-Prot;Acc:O64823]
AT5G25560	CHY-type/CTCHY-type/RING-type Zinc finger protein [Source:UniProtKB/TrEMBL;Acc:F4JY59]
AT3G10570	CYP77A6 [Source:UniProtKB/TrEMBL;Acc:A0A384LHU4]
AT2G36570	Leucine-rich repeat receptor-like protein kinase PXC1 [Source:UniProtKB/Swiss-Prot;Acc:Q9SJQ1]
AT1G56070	Elongation factor 2 [Source:UniProtKB/Swiss-Prot;Acc:Q9ASR1]
AT3G52960	Peroxiredoxin-2E, chloroplastic [Source:UniProtKB/Swiss-Prot;Acc:Q949U7]
AT5G51950	AT5g51950/MSG15_3 [Source:UniProtKB/TrEMBL;Acc:Q94KD2]
AT1G72290	Cysteine protease inhibitor WSCP [Source:UniProtKB/Swiss-Prot;Acc:Q9C7S6]
AT5G50790	Bidirectional sugar transporter SWEET10 [Source:UniProtKB/Swiss-Prot;Acc:Q9LUE3]
AT5G11740	ATAGP15 [Source:UniProtKB/TrEMBL;Acc:C0SVP3]
AT1G26580	At1g26580 [Source:UniProtKB/TrEMBL;Acc:Q9FZE2]
AT5G23530	Probable carboxylesterase 18 [Source:UniProtKB/Swiss-Prot;Acc:Q9LT10]
AT4G34710	Arginine decarboxylase 2 [Source:UniProtKB/Swiss-Prot;Acc:O23141]
AT2G25590	Plant Tudor-like protein [Source:UniProtKB/TrEMBL;Acc:Q9SLA4]
AT3G51600	Non-specific lipid-transfer protein 5 [Source:UniProtKB/Swiss-Prot;Acc:Q9XFS7]
AT1G05850	Chitinase-like protein 1 [Source:UniProtKB/Swiss-Prot;Acc:Q9MA41]
AT1G60950	Ferredoxin [Source:UniProtKB/TrEMBL;Acc:A0A178W2W5]
AT5G22430	Pollen Ole e 1 allergen and extensin family protein [Source:UniProtKB/TrEMBL;Acc:Q9FMQ8]
AT5G65050	Agamous-like MADS-box protein AGL31 [Source:UniProtKB/Swiss-Prot;Acc:Q9FPN7]
AT4G24960	HVA22D [Source:UniProtKB/TrEMBL;Acc:A0A384LBZ3]
AT1G30970	zinc finger (C2H2 type) family protein [Source:TAIR;Acc:AT1G30970]
AT5G19250	Uncharacterized GPI-anchored protein At5g19250 [Source:UniProtKB/Swiss-Prot;Acc:P59833]
AT2G35960	NDR1/HIN1-like protein 12 [Source:UniProtKB/Swiss-Prot;Acc:Q9SJ54]
AT1G30590	RNA polymerase I specific transcription initiation factor RRN3 protein [Source:TAIR;Acc:AT1G30590]
AT5G55100	SWAP (Suppressor-of-White-APricot)/surp domain-containing protein [Source:UniProtKB/TrEMBL;Acc:Q94BN8]
AT1G09310	T31J12.3 protein [Source:UniProtKB/TrEMBL;Acc:Q9ZPZ4]
AT4G27560	UDP-glycosyltransferase 79B2 [Source:UniProtKB/Swiss-Prot;Acc:Q9T080]
AT5G22700	F-box/RNI-like/FBD-like domains-containing protein [Source:TAIR;Acc:AT5G22700]
AT1G60260	beta glucosidase 5 [Source:TAIR;Acc:AT1G60260]
AT1G70090	Probable galacturonosyltransferase-like 9 [Source:UniProtKB/Swiss-Prot;Acc:O04536]
AT5G67070	Protein RALF-like 34 [Source:UniProtKB/Swiss-Prot;Acc:Q9FHA6]
AT4G38950	Kinesin-like protein KIN-7F [Source:UniProtKB/Swiss-Prot;Acc:F4JUI9]
AT1G53070	Lectin-like protein At1g53070 [Source:UniProtKB/Swiss-Prot;Acc:Q9LNN2]
AT1G31600	-
AT3G23810	Adenosylhomocysteinase [Source:UniProtKB/TrEMBL;Acc:A0A178VEP9]
AT1G10570	Ubiquitin-like-specific protease 1C [Source:UniProtKB/Swiss-Prot;Acc:Q8RWN0]
AT1G69750	At1g66590 [Source:UniProtKB/TrEMBL;Acc:Q9C9L6]
AT5G20330	Probable glucan endo-1,3-beta-glucosidase BG4 [Source:UniProtKB/Swiss-Prot;Acc:O49352]
AT1G04410	Malate dehydrogenase [Source:UniProtKB/TrEMBL;Acc:A0A178W4H0]
AT5G42400	SET domain protein 25 [Source:TAIR;Acc:AT5G42400]
AT1G75500	Protein WALLS ARE THIN 1 [Source:UniProtKB/Swiss-Prot;Acc:Q94AP3]
AT1G64970	Tocopherol O-methyltransferase, chloroplastic [Source:UniProtKB/Swiss-Prot;Acc:Q9ZSK1]
AT4G03205	Coproporphyrinogen III oxidase [Source:TAIR;Acc:AT4G03205]
AT1G78300	14-3-3-like protein GF14 omega [Source:UniProtKB/Swiss-Prot;Acc:Q01525]
AT4G33260	Cell division cycle 20.2, cofactor of APC complex [Source:UniProtKB/Swiss-Prot;Acc:Q9S7I8]
AT4G32060	Calcium uptake protein, mitochondrial [Source:UniProtKB/Swiss-Prot;Acc:Q9SZ45]
AT2G39580	CONTAINS InterPro DOMAIN/s: Putative zinc-finger domain (InterPro:IPR019607); Ha. [Source:TAIR;Acc:AT2G39580]
AT2G38540	Non-specific lipid-transfer protein [Source:UniProtKB/TrEMBL;Acc:A0A178VZQ3]
AT1G65370	At1g65370/T8F5_15 [Source:UniProtKB/TrEMBL;Acc:Q940M1]
AT1G47260	GAMMA CA2 [Source:UniProtKB/TrEMBL;Acc:A0A178WI45]
AT1G27520	Alpha-mannosidase I MNS5 [Source:UniProtKB/Swiss-Prot;Acc:Q9SXC9]
AT4G02430	RNA-binding (RRM/RBD/RNP motifs) family protein [Source:TAIR;Acc:AT4G02430]
AT4G39730	PLAT1 [Source:UniProtKB/TrEMBL;Acc:A0A178V098]
AT3G04120	Glyceraldehyde-3-phosphate dehydrogenase GAPC1, cytosolic [Source:UniProtKB/Swiss-Prot;Acc:P25858]
AT3G52930	Fructose-bisphosphate aldolase [Source:UniProtKB/TrEMBL;Acc:A0A178V8L4]
AT5G24670	Cytidine/deoxycytidylate deaminase family protein [Source:UniProtKB/TrEMBL;Acc:F4KH85]
AT5G47500	Probable pectinesterase 68 [Source:UniProtKB/Swiss-Prot;Acc:Q8LPF3]
AT5G19290	Alpha/beta-Hydrolases superfamily protein [Source:UniProtKB/TrEMBL;Acc:Q8VZV6]
AT4G22050	Eukaryotic aspartyl protease family protein [Source:UniProtKB/TrEMBL;Acc:F4JKD9]
AT1G75950	SKP1-like protein 1A [Source:UniProtKB/Swiss-Prot;Acc:Q39255]
AT5G02940	Protein of unknown function (DUF1012) [Source:TAIR;Acc:AT5G02940]
AT3G47680	At3g47680 [Source:UniProtKB/TrEMBL;Acc:Q9STU5]
AT5G35170	Adenylate kinase 5, chloroplastic [Source:UniProtKB/Swiss-Prot;Acc:Q8VYL1]
AT5G09880	Splicing factor, CC1-like protein [Source:UniProtKB/TrEMBL;Acc:Q93Y25]
AT3G06500	Alkaline/neutral invertase C, mitochondrial [Source:UniProtKB/Swiss-Prot;Acc:B9DFA8]
AT2G11225	-
AT3G45940	Putative alpha-xylosidase 2 [Source:UniProtKB/Swiss-Prot;Acc:F4J6T7]
AT5G66030	Protein GRIP [Source:UniProtKB/Swiss-Prot;Acc:Q8S2T0]
AT3G57470	Insulin-degrading enzyme-like 2 [Source:UniProtKB/Swiss-Prot;Acc:F4J3D9]
AT5G55310	DNA topoisomerase 1 beta [Source:UniProtKB/Swiss-Prot;Acc:Q9FJ79]
AT1G30490	Homeobox-leucine zipper protein ATHB-9 [Source:UniProtKB/Swiss-Prot;Acc:O04292]
AT3G29390	Protein RIK [Source:UniProtKB/Swiss-Prot;Acc:Q9LIA4]
AT5G44750	DNA repair protein REV1 [Source:UniProtKB/Swiss-Prot;Acc:A3EWL3]
AT3G61010	Ferritin [Source:UniProtKB/TrEMBL;Acc:F4JD24]
AT4G08035	other RNA [Source:TAIR;Acc:AT4G08035]
AT2G26250	epidermis-specific, encodes KCS10, a putative 3-ketoacyl-CoA synthase. probably involved in the synthesis of long-chain lipids found in the cuticle.
AT5G08690	Encodes the mitochondrial ATP synthase beta-subunit. This subunit is encoded by a multigene family of three members (At5g08670, At5g08680, At5g08690) that shared 98% sequence identity at the amino acid level. The mRNA is cell-to-cell mobile.

## Sheet: Auxin
gene_id	gene_description
AT1G04250	Auxin-responsive protein IAA17 [Source:UniProtKB/Swiss-Prot;Acc:P93830]
AT5G18030	Auxin-responsive protein SAUR21 [Source:UniProtKB/Swiss-Prot;Acc:Q9FJF9]
AT2G23170	Indole-3-acetic acid-amido synthetase GH3.3 [Source:UniProtKB/Swiss-Prot;Acc:O22190]
AT2G22670	Auxin-responsive protein [Source:UniProtKB/TrEMBL;Acc:F4IKE6]
AT5G18020	Auxin-responsive protein SAUR20 [Source:UniProtKB/Swiss-Prot;Acc:Q9FJG0]
AT5G18060	SAUR23 [Source:UniProtKB/TrEMBL;Acc:A0A178UM65]
AT5G18080	Auxin-responsive protein SAUR24 [Source:UniProtKB/Swiss-Prot;Acc:Q9FK62]
AT2G47170	ADP-ribosylation factor 1 [Source:UniProtKB/Swiss-Prot;Acc:P36397]
AT5G57420	Auxin-responsive protein IAA33 [Source:UniProtKB/Swiss-Prot;Acc:Q9FKM7]
AT1G19220	Auxin response factor 19 [Source:UniProtKB/Swiss-Prot;Acc:Q8RYC8]
AT5G18050	Auxin-responsive protein SAUR22 [Source:UniProtKB/Swiss-Prot;Acc:Q9FJF7]
AT1G34420	F12K21.25 [Source:UniProtKB/TrEMBL;Acc:Q9LNK3]
AT5G18010	Auxin-responsive protein SAUR19 [Source:UniProtKB/Swiss-Prot;Acc:Q9FJG1]
AT1G59500	Indole-3-acetic acid-amido synthetase GH3.4 [Source:UniProtKB/Swiss-Prot;Acc:Q9LQ68]
AT1G15050	Auxin-responsive protein IAA34 [Source:UniProtKB/Swiss-Prot;Acc:Q9C5X0]
AT2G01200	Auxin-responsive protein IAA32 [Source:UniProtKB/Swiss-Prot;Acc:Q8RYC6]
AT3G16020	F-box associated ubiquitination effector protein [Source:UniProtKB/TrEMBL;Acc:F4J1E9]
AT4G38850	Auxin-responsive protein SAUR15 [Source:UniProtKB/Swiss-Prot;Acc:Q41220]

## Sheet: MIRNA
gene_id	gene_description
AT2G42200	Squamosa promoter-binding-like protein 9 [Source:UniProtKB/Swiss-Prot;Acc:Q700W2]
AT3G15270	SPL5 [Source:UniProtKB/TrEMBL;Acc:A0A178VL13]
AT1G01040	Dicer-like 1 [Source:UniProtKB/TrEMBL;Acc:F4HQG6]
AT1G48410	ICU9 [Source:UniProtKB/TrEMBL;Acc:A0A178WL72]
AT5G10945	MIR156D; miRNA [Source:TAIR;Acc:AT5G10945]
AT5G46845	MIR160/MIR160C (MICRORNA160); miRNA [Source:TAIR;Acc:AT5G46845]
AT2G28350	Involved in root cap cell differentiation.

## Sheet: Pollen Tube Attractant Genes
gene_id	gene_description
AT1G31450	Aspartyl protease family protein [Source:UniProtKB/TrEMBL;Acc:Q9C864]
AT2G35615	Probable aspartic protease At2g35615 [Source:UniProtKB/Swiss-Prot;Acc:Q3EBM5]
AT5G48605	Defensin-like protein 220 [Source:UniProtKB/Swiss-Prot;Acc:Q2V304]
AT5G43513	Protein LURE 1.3 [Source:UniProtKB/Swiss-Prot;Acc:Q4VP10]
AT5G43285	Protein LURE 1.1 [Source:UniProtKB/Swiss-Prot;Acc:Q4VP09]
AT5G50423	Defensin-like protein 222 [Source:UniProtKB/Swiss-Prot;Acc:Q2V300]
AT5G18403	Defensin-like protein 218 [Source:UniProtKB/Swiss-Prot;Acc:Q2V370]
AT4G14276	Defensin-like protein 21 [Source:UniProtKB/Swiss-Prot;Acc:P0CAX9]
AT5G43518	Protein LURE 1.4 [Source:UniProtKB/Swiss-Prot;Acc:P0CAY6]
AT5G43510	Protein LURE 1.2 [Source:UniProtKB/Swiss-Prot;Acc:Q4VP08]
AT5G43525	Protein LURE 1.5 [Source:UniProtKB/Swiss-Prot;Acc:A8MRC6]
AT4G38780	Pre-mRNA-processing-splicing factor [Source:TAIR;Acc:AT4G38780]
AT1G80070	SUS2 [Source:UniProtKB/TrEMBL;Acc:A0A178W7J7]
AT4G12970	EPIDERMAL PATTERNING FACTOR-like protein 9 [Source:UniProtKB/Swiss-Prot;Acc:Q9SV72]
AT4G18770	Transcription factor MYB98 [Source:UniProtKB/Swiss-Prot;Acc:Q9S7L2]
AT1G10717	EMBRYO SURROUNDING FACTOR 1.3 [Source:UniProtKB/Swiss-Prot;Acc:A8MQA5]
AT5G48595	Defensin-like protein 219 [Source:UniProtKB/Swiss-Prot;Acc:Q2V305]
